# Supplementary material for: Myeloid leukemia vulnerabilities at CTCF-enriched long noncoding RNA loci
Source: Research Square preprint supplement (doi:10.21203/rs.3.rs-727909/v1), 2021-08-09
Supplement: Supplementary file 1 [file 0e90c2d8a537f1c2e385cc25.xlsx]

## Sheet: Sheet 1
Supplementary Table 7: CRISPRi lncRNA library sequences
sgRNA_name	target gene	spacer	signature
LUC1_1	LUC-Renilla	GGTATAATACACCGCGCTAC	controls
LUC1_2	LUC-Renilla	CACATATTGAGCCAGTAGCG	controls
LUC1_3	LUC-Renilla	TTGCCCATACCAATAAGGTC	controls
LUC1_4	LUC-Renilla	GGATGATAACTGGTCCGCAG	controls
LUC1_5	LUC-Renilla	GATAACTGGTCCGCAGTGGT	controls
LUC1_6	LUC-Renilla	CTTATTGGTATGGGCAAATC	controls
LUC1_7	LUC-Renilla	CGCGCTACTGGCTCAATATG	controls
LUC1_8	LUC-Renilla	TGTATTATACCAGACCTTAT	controls
LUC1_9	LUC-Renilla	TGATAACTGGTCCGCAGTGG	controls
LUC1_10	LUC-Renilla	CCATGATTGGGGTGCTTGTT	controls
LUC2_1	LUC3	CATAGCTTCTGCCAACCGAA	controls
LUC2_2	LUC3	CCTCTAGAGGATGGAACCGC	controls
LUC2_3	LUC3	AATACTTCGAAATGTCCGTT	controls
LUC2_4	LUC3	CTTCGAAATGTCCGTTCGGT	controls
LUC2_5	LUC3	CTAGAGGATAGAATGGCGCC	controls
LUC2_6	LUC3	CGCTGGAGAGCAACTGCATA	controls
LUC2_7	LUC3	TCTAGAGGATAGAATGGCGC	controls
LUC2_8	LUC3	CAGAAGCTATGAAACGATAT	controls
LUC2_9	LUC3	AAGAGATACGCCCTGGTTCC	controls
LUC2_10	LUC3	GGCTATGAAGAGATACGCCC	controls
LUC3_1	GL3-LUC3	TCCAGCGGATAGAATGGCGC	controls
LUC3_2	GL3-LUC3	TTCATTATAAATGTCGTTCG	controls
LUC3_3	GL3-LUC3	GGATTCTAAAACGGATTACC	controls
LUC3_4	GL3-LUC3	TCATTATAAATGTCGTTCGC	controls
LUC3_6	GL3-LUC3	CCCGGCGCCATTCTATCCGC	controls
LUC3_7	GL3-LUC3	CCGCTGGAAGATGGAACCGC	controls
LUC3_8	GL3-LUC3	GGGCATTTCGCAGCCTACCG	controls
LUC3_10	GL3-LUC3	CAATTCTTTATGCCGGTGTT	controls
MYC_1	MYC	CTTGGCGGGAAAAAGAACGG	controls
MYC_2	MYC	ATCGCGCTGAGTATAAAAGC	controls
MYC_3	MYC	CGGCCGCGAGCAGCACAGCT	controls
MYB_1	MYB	AGCGGCGCTCCGCACCGCTG	controls
MYB_2	MYB	CCGCTGGGGCGAAGTTTCTC	controls
MYB_3	MYB	GAAACTTCGCCCCAGCGGTG	controls
ACTB_1	ACTB	TAAGCCCGGCCAGCCGACCG	controls
ACTB_2	ACTB	GGTAAGCCCGGCCAGCCGAC	controls
ACTB_3	ACTB	GTAAGCCCGGCCAGCCGACC	controls
AC002454.1_1	AC002454.1	AGTCGCGTCGGGCCTCCCGA	HSPC, GMP
AC002454.1_2	AC002454.1	TTACCTGCTCCGCGAGGCCG	HSPC, GMP
AC002454.1_3	AC002454.1	CTCGGGAGGCCCGACGCGAC	HSPC, GMP
AC004540.4_1	AC004540.4	GGGAGGGTCATCGGCGTTTA	HSPC, CMP
AC004540.4_2	AC004540.4	TCCGGGCGGTGCACTTGGTG	HSPC, CMP
AC004540.4_3	AC004540.4	AAGCCGGGACACGCGGAGGC	HSPC, CMP
AC004941.3_1	AC004941.3	GCAGGAACCTCTTGGCGTGT	GMP
AC004941.3_2	AC004941.3	CGTAAACCATAGGAGACACC	GMP
AC004941.3_3	AC004941.3	ATAAGACATTACAGCCTTAC	GMP
AC005105.2_1	AC005105.2	CTCCGGGGCCCTGTAATGAG	GMP
AC005105.2_2	AC005105.2	CTAGGCCAGGTTCGTGACCC	GMP
AC005105.2_3	AC005105.2	CTGCCATGACCTCTCATTAC	GMP
AC005229.7_1	AC005229.7	TGCTGTCAGTCATGTTTCCG	HSC_SpotB
AC005229.7_2	AC005229.7	TGAAATAGATGCGGCGACCG	HSC_SpotB
AC005229.7_3	AC005229.7	GAGTTAGAGACTGAGACCCG	HSC_SpotB
AC005281.1_1	AC005281.1	TAAGTACTCTACTGTCATCA	HSC_SpotA
AC005281.1_2	AC005281.1	AAGTACTCTACTGTCATCAA	HSC_SpotA
AC005281.1_3	AC005281.1	TCTCATGAGAAATTAGTGAG	HSC_SpotA
AC006159.5_1	AC006159.5	CTAAAACCACTGAGACACGG	HSC_SpotA
AC006159.5_2	AC006159.5	AAGCTCACTCACATGGCCGA	HSC_SpotA
AC006159.5_3	AC006159.5	CCTCAGTCTGACAGCCTAAG	HSC_SpotA
AC007677.2_1	AC007677.2	TTTCTTGGTCAAGCGAATAG	HSC_SpotA
AC007677.2_2	AC007677.2	TTATATATGCATACCCTTGG	HSC_SpotA
AC007677.2_3	AC007677.2	TATGCATACCCTTGGTGGCC	HSC_SpotA
AC008746.3_1	AC008746.3	ACCAGGAAACTTCGGTAAAC	HSC_SpotA
AC008746.3_2	AC008746.3	TTCGGTAAACAGGACCGAGA	HSC_SpotA
AC008746.3_3	AC008746.3	ACCGAAGTTTCCTGGTACTG	HSC_SpotA
AC009120.3_1	AC009120.3	TCCTTTCTTGTAGGTTCGTG	GMP
AC009120.3_2	AC009120.3	AAGGCCTGAGAATATACAGC	GMP
AC009120.3_3	AC009120.3	TCCACACGAACCTACAAGAA	GMP
AC009299.3_1	AC009299.3	CGGAGGCTAGAAAGACGCCG	CMP, DSAMKL
AC009299.3_2	AC009299.3	GGCGGAGGCTAGAAAGACGC	CMP, DSAMKL
AC009299.3_3	AC009299.3	GCGGAGGCTAGAAAGACGCC	CMP, DSAMKL
AC010082.2_1	AC010082.2	GATTGCTTGTGGCCAGTAGT	HSC_SpotA, HSPC
AC010082.2_2	AC010082.2	AACCCTCACCAGGCTGGGCA	HSC_SpotA, HSPC
AC010082.2_3	AC010082.2	CCTCACCAGGCTGGGCATGG	HSC_SpotA, HSPC
AC012307.2_1	AC012307.2	CAAGGACTCCAAAGGTCCCT	GMP
AC012307.2_2	AC012307.2	CACACATAGTGGAACTGCAC	GMP
AC012307.2_3	AC012307.2	CAGGGACCTTTGGAGTCCTT	GMP
AC016722.3_1	AC016722.3	GCCGACAGGAACAGGATCTT	HSC_SpotA
AC016722.3_2	AC016722.3	ACTGCCCCCAACATTGTACT	HSC_SpotA
AC016722.3_3	AC016722.3	TTCGCCCAGTACAATGTTGG	HSC_SpotA
AC016908.1_1	AC016908.1	TTAAGCTTCTGGTCTAGCTC	t8:21
AC016908.1_2	AC016908.1	GAGCTAGACCAGAAGCTTAA	t8:21
AC016908.1_3	AC016908.1	CACTAGCTCCTCACTCTCTT	t8:21
AC017079.4_1	AC017079.4	AAAACGGCATGTTTTCCAAA	HSC_SpotA
AC017079.4_2	AC017079.4	AAAACATGCCGTTTTTCCTT	HSC_SpotA
AC017079.4_3	AC017079.4	ATACGTGACCAAAGGAAAAA	HSC_SpotA
AC018799.1_1	AC018799.1	ATTGGCTTACCTGCCCTCAA	HSC_SpotA
AC018799.1_2	AC018799.1	TCATTGATTTCTATTTTGAC	HSC_SpotA
AC018799.1_3	AC018799.1	AGAAATCTTCCTTTGAGGGC	HSC_SpotA
AC019178.3_1	AC019178.3	ATTTCGGTATCATTACCATT	HSC_SpotA
AC019178.3_2	AC019178.3	ACTTCTCAAGATCAACCTAA	HSC_SpotA
AC019178.3_3	AC019178.3	AATAGAAACTGAAGCTAACT	HSC_SpotA
AC021218.2_1	AC021218.2	TACTTACTGTGGACGACGGT	GMP
AC021218.2_2	AC021218.2	GTACTACTTACTGTGGACGA	GMP
AC021218.2_3	AC021218.2	AGCACGGGTACTACTTACTG	GMP
AC023347.2_1	AC023347.2	TGTCCCGTTCAGTACAGAAG	HSC_SpotA
AC023347.2_2	AC023347.2	GCAACTATACTGGAACTAAT	HSC_SpotA
AC023347.2_3	AC023347.2	TGGCCACTTCTGTACTGAAC	HSC_SpotA
AC024084.1_1	AC024084.1	CTAAGTGAATTACATATCGC	AMKL
AC024084.1_2	AC024084.1	GTGATAAAACTTCAAAAAAC	AMKL
AC024084.1_3	AC024084.1	TTTTCAAAGCTGTAAGAAAG	AMKL
AC024704.2_1	AC024704.2	TAGAAAAAGCCACTTGTCGT	AMKL
AC024704.2_2	AC024704.2	TCATCTTGTCCTACGACAAG	AMKL
AC024704.2_3	AC024704.2	TTTGAATCACTCCCCCACTG	AMKL
AC053503.6_1	AC053503.6	GATGGGCTATGTCGCTGTTG	HSC_SpotA
AC053503.6_2	AC053503.6	TGTCGCTGTTGGGGACCACG	HSC_SpotA
AC053503.6_3	AC053503.6	GTCGCTGTTGGGGACCACGA	HSC_SpotA
AC066692.3_1	AC066692.3	TGAGTCGCATGTGCACTCCT	AMKL
AC066692.3_2	AC066692.3	AGTGGGAACCTTGCAGTGAC	AMKL
AC066692.3_3	AC066692.3	AGGGCAGAGCCGATTGAGAC	AMKL
AC068831.3_1	AC068831.3	GTGCACTTCTGCTGCGGTCG	GMP
AC068831.3_2	AC068831.3	TCGTGCACTTCTGCTGCGGT	GMP
AC068831.3_3	AC068831.3	GCACGAGGTCTACGGTCATC	GMP
AC069277.2_1	AC069277.2	GGCTTAAAAATCCTCGCACC	DSAMKL
AC069277.2_2	AC069277.2	GCAATCAGCGAGACTCCCTG	DSAMKL
AC069277.2_3	AC069277.2	TGGTGCGAGGATTTTTAAGC	DSAMKL
AC073264.6_1	AC073264.6	CACGAGTGTGGCACTGACGT	DSAMKL
AC073264.6_2	AC073264.6	GTGCCACACTCGTGTCTGAA	DSAMKL
AC073264.6_3	AC073264.6	ATTCCTTTCAGACACGAGTG	DSAMKL
AC079779.5_1	AC079779.5	GCGGCCTCTGGGAGGCGAAC	HSC_SpotA
AC079779.5_2	AC079779.5	CGGCCTCTGGGAGGCGAACG	HSC_SpotA
AC079779.5_3	AC079779.5	GTGAAGCGGGCAGGGCGAGC	HSC_SpotA
AC079780.3_1	AC079780.3	CTGACCCAGAGAAAGAGTTC	CMP
AC079780.3_2	AC079780.3	TAGTTCACTTCCTTTGGGAC	CMP
AC079780.3_3	AC079780.3	ATTACCCAGAACTCTTTCTC	CMP
AC084219.4_1	AC084219.4	CCCCACTAGGCAGGCGCTCG	CMP
AC084219.4_2	AC084219.4	GCCACGAGCGCCTGCCTAGT	CMP
AC084219.4_3	AC084219.4	TGCCACTCCGAGGTGCCCAC	CMP
AC091705.1_1	AC091705.1	AGTCTACACAATATTCAGGT	AMKL
AC091705.1_2	AC091705.1	GAACTTCCCAGGAATCTCCC	AMKL
AC091705.1_3	AC091705.1	ATTGTGTAGACTTCTCAGCC	AMKL
AC092933.4_1	AC092933.4	GAACTGCGGTGTCGCGCCTC	GMP
AC092933.4_2	AC092933.4	AACTGCGGTGTCGCGCCTCC	GMP
AC092933.4_3	AC092933.4	CACGTCCTACAAGGGCGTGC	GMP
AC093627.9_1	AC093627.9	AGGTGACTATGGCGTTGCGC	HSC_SpotA
AC093627.9_2	AC093627.9	TCCTCATTGCGCCGGCGCCG	HSC_SpotA
AC093627.9_3	AC093627.9	CTCCTCATTGCGCCGGCGCC	HSC_SpotA
AC097359.2_1	AC097359.2	GGGCTCATTGCACTTTGTGC	GMP
AC097359.2_2	AC097359.2	ACGCAGCAATCAAGGTGAAC	GMP
AC097359.2_3	AC097359.2	TATAGCTCGATCATCTCCAG	GMP
AC097463.1_1	AC097463.1	GAGTGTCTTCTAGCCAGTCC	HSC_SpotA
AC097463.1_2	AC097463.1	ACTGGCTAGAAGACACTCTG	HSC_SpotA
AC097463.1_3	AC097463.1	TCTGTACCTGGTTTTCTCTA	HSC_SpotA
AC098826.4_1	AC098826.4	AAACCCGGTCTTCTTGGTTG	t8:21
AC098826.4_2	AC098826.4	TGTAGCCATAGAATTCTGTC	t8:21
AC098826.4_3	AC098826.4	CTACAGAAACCCGGTCTTCT	t8:21
AC100848.1_1	AC100848.1	GTAGAATAGTGCTAGTTTGA	AMKL
AC100848.1_2	AC100848.1	AAGATTATAGCAAATGGGTG	AMKL
AC100848.1_3	AC100848.1	CATTTGCTATAATCTTTATA	AMKL
AC106875.1_1	AC106875.1	TATAAAGAAATACCCGAACC	GMP
AC106875.1_2	AC106875.1	ATAAAGAAATACCCGAACCT	GMP
AC106875.1_3	AC106875.1	CCGTCATTGTAAGTTTCCCG	GMP
AC113189.5_1	AC113189.5	AGTCCTACTCGAGTGACCGT	GMP
AC113189.5_2	AC113189.5	CGTCACTTAGTCGCCGATCA	GMP
AC113189.5_3	AC113189.5	ACGGTCACTCGAGTAGGACT	GMP
AC133785.1_1	AC133785.1	TACGAGCCGCGCCGCCGAGC	GMP
AC133785.1_2	AC133785.1	CGGCTCGTAGTGCTGCGGCC	GMP
AC133785.1_3	AC133785.1	GTAGTGCTGCGGCCGGGCTC	GMP
AC147651.4_1	AC147651.4	CTGACCTCCGCAGATGACCG	GMP
AC147651.4_2	AC147651.4	AGGTCCTCGGTCATCTGCGG	GMP
AC147651.4_3	AC147651.4	AGGACCTGCCTCCCTGCGGT	GMP
ACSF2_1	ACSF2	CAGCTCGGTCAGGTCGTCGA	GMP
ACSF2_2	ACSF2	CGAGCTGACCTACCTCTACC	GMP
ACSF2_3	ACSF2	GCAGCACGCGGATGTCGTTA	GMP
ADAMTS9-AS1_1	ADAMTS9-AS1	GAGAACGTAAGTGGGAGCTT	HSC_SpotA
ADAMTS9-AS1_2	ADAMTS9-AS1	CTGCTGTACGCCTCGGCCAC	HSC_SpotA
ADAMTS9-AS1_3	ADAMTS9-AS1	GGCGTACAGCAGAGGCATGT	HSC_SpotA
ADAMTS9-AS1_4	ADAMTS9-AS1	GCTATGAAAGTCATTGGATT	HSC_SpotA
ADAMTS9-AS1_5	ADAMTS9-AS1	GTGGCCGAGGCGTACAGCAG	HSC_SpotA
AGAP2-AS1_1	AGAP2-AS1	GCTCTGGGTCTACCCGCTCG	GMP
AGAP2-AS1_2	AGAP2-AS1	TGCTCTGGGTCTACCCGCTC	GMP
AGAP2-AS1_3	AGAP2-AS1	TTGCTCTGGGTCTACCCGCT	GMP
AJ006998.2_1	AJ006998.2	ATCCTGAATGCCCCTCCTGC	HSC_SpotA, HSPC, GMP
AJ006998.2_2	AJ006998.2	ACTCTAAATCTTCCTTATGA	HSC_SpotA, HSPC, GMP
AJ006998.2_3	AJ006998.2	TAAATGTCAGTGCCTTCATA	HSC_SpotA, HSPC, GMP
AKR1C7P_1	AKR1C7P	TAATACATCTGAACTGACGG	DSAMKL
AKR1C7P_2	AKR1C7P	TCTGAACTGACGGTGGCCTC	DSAMKL
AKR1C7P_3	AKR1C7P	ATCAGCAATCTTCTCTCGAA	DSAMKL
AMD1P1_1	AMD1P1	GTTTGCTGCTCCCAAGGATC	t8:21
AMD1P1_2	AMD1P1	CAAAGGGGACGAGAAGCTGC	t8:21
AMD1P1_3	AMD1P1	TTTGCTGCTCCCAAGGATCT	t8:21
ANKRD30BL_1	ANKRD30BL	CGCGTGCGCGCAATCCCCGA	GMP
ANKRD30BL_2	ANKRD30BL	GCGTGCGCGCAATCCCCGAA	GMP
ANKRD30BL_3	ANKRD30BL	GTGGACTAGGGGGCCCTTCG	GMP
AOX2P_1	AOX2P	CCAGGACTGACAATAGGCGC	CMP
AOX2P_2	AOX2P	CCAGCGCCTATTGTCAGTCC	CMP
AOX2P_3	AOX2P	GTTTTTACTGGTGACATAAG	CMP
AP000253.1_1	AP000253.1	ATTTCGCGTACTGCAACCGG	AMKL
AP000253.1_2	AP000253.1	TTCTCCACATTTCGGGGTTC	AMKL
AP000253.1_3	AP000253.1	CCGGTTGCAGTACGCGAAAT	AMKL
AP001048.4_1	AP001048.4	CAGAGAAATACCTCAGTGCG	GMP
AP001048.4_2	AP001048.4	TTCTGTACAGCCACGCACTG	GMP
AP001048.4_3	AP001048.4	GTGCGTGGCTGTACAGAATA	GMP
AP001434.2_1	AP001434.2	GCAGGGCCGTGTAGAACTTG	GMP
AP001434.2_2	AP001434.2	TCCCAACTGACTAAAGACTC	GMP
AP001434.2_3	AP001434.2	GGATGGCCACAAGTTCTACA	GMP
AP002856.7_1	AP002856.7	GAGTACATGGACGGGCTTAC	GMP
AP002856.7_2	AP002856.7	TGATTCATTGAGTACGCTTG	GMP
AP002856.7_3	AP002856.7	TAAGCCCGTCCATGTACTCC	GMP
AP4B1-AS1_1	AP4B1-AS1	TTAGGTGCGTCTAACCCCTT	HSC_SpotA
AP4B1-AS1_2	AP4B1-AS1	GGTTAGACGCACCTAACCTA	HSC_SpotA
AP4B1-AS1_3	AP4B1-AS1	GGCTTCAACCCCTACATTAT	HSC_SpotA
ARF4P2_1	ARF4P2	GCACATTTGGACGGTTCGAT	t8:21
ARF4P2_2	ARF4P2	GTATAAACTGAAGTTAGGGG	t8:21
ARF4P2_3	ARF4P2	CTGCTTCTTGCTGAAGAGGC	t8:21
ARMC2-AS1_1	ARMC2-AS1	GCTCTTAAATGTTCAGCTAC	HSC_SpotA
ARMC2-AS1_2	ARMC2-AS1	TCCCATGGTGAGCTCCTCTA	HSC_SpotA
ARMC2-AS1_3	ARMC2-AS1	ACCCTAGAGGAGCTCACCAT	HSC_SpotA
ATE1-AS1_1	ATE1-AS1	GGCCGCGCCAACTCCGGCGT	CMP
ATE1-AS1_2	ATE1-AS1	TCCCGACGCCGGAGTTGGCG	CMP
ATE1-AS1_3	ATE1-AS1	GCGTCGGGAACACTCACCGC	CMP
ATP5F1P6_1	ATP5F1P6	CAATATCCCTGGACCTATGA	HSC_SpotB, t8:21
ATP5F1P6_2	ATP5F1P6	TGGTGGCAGAATGTGCCACC	HSC_SpotB, t8:21
ATP5F1P6_3	ATP5F1P6	GGCACATTCTGCCACCACCA	HSC_SpotB, t8:21
BAALC-AS2_1	BAALC-AS2	TCGCTGGTCGGGAGACCGGT	GMP
BAALC-AS2_2	BAALC-AS2	CTTGTCCAAAGCTTGCTCGC	GMP
BAALC-AS2_3	BAALC-AS2	CATCGGCGCAGCCTTCGGTA	GMP
BAK1P1_1	BAK1P1	GGTGGTAAAAAACGTAGCTG	GMP
BAK1P1_2	BAK1P1	ATGGCCTCGGGGCAAGGCCC	GMP
BAK1P1_3	BAK1P1	ACTCCTGCCTGGGAGGACCT	GMP
BDNF-AS_1	BDNF-AS	CCGCTCCTTCCGCGGTGACG	HSPC
BDNF-AS_2	BDNF-AS	AGCCAAGGGTTCGAAGCGAT	HSPC
BDNF-AS_3	BDNF-AS	GGTGGCCGAGTGTGTCGCCG	HSPC
BDNF-AS_4	BDNF-AS	GGGGACCTCGTCACCGCGGA	HSPC
BDNF-AS_5	BDNF-AS	GCCATCAGGGTAAGGGTACC	HSPC
BOLA2P3_1	BOLA2P3	CCTGTAGCTTCTGGCGGTGT	GMP
BOLA2P3_2	BOLA2P3	CCGACACCGCCAGAAGCTAC	GMP
BOLA2P3_3	BOLA2P3	ACTCAGGGCCGAATACCTCA	GMP
BRWD1P1_1	BRWD1P1	TTTGACTCCGCGATAGGCGC	t8:21
BRWD1P1_2	BRWD1P1	TGTCCGCCCAGCGCCTATCG	t8:21
BRWD1P1_3	BRWD1P1	TACAGCTTTGACTCCGCGAT	t8:21
BTF3P8_1	BTF3P8	AGGAAAACCCACCAAACTGC	t8:21
BTF3P8_2	BTF3P8	GCAGTTCCTTTCCTGCAGTT	t8:21
BTF3P8_3	BTF3P8	TTCCTTTCCTGCAGTTTGGT	t8:21
BX322557.10_1	BX322557.10	GGTTCGCGGCGGTGCTGTCG	HSPC
BX322557.10_2	BX322557.10	CCGCGAGGCCGGGAGGTCCG	HSPC
BX322557.10_3	BX322557.10	CTCCTGAGGGTCCGCGAGGC	HSPC
C20orf203_1	C20orf203	TGTGTGATCCCCAAAACCCT	DSAMKL
C20orf203_2	C20orf203	AAAAGTCAGCTCAGACCCAC	DSAMKL
C20orf203_3	C20orf203	CACCACCACTCAGCTCTGAG	DSAMKL
C3orf67-AS1_1	C3orf67-AS1	AATCTCTAGCAGCTTGATCA	HSPC
C3orf67-AS1_2	C3orf67-AS1	GATAATCCTGCCATGTTAAA	HSPC
C3orf67-AS1_3	C3orf67-AS1	TGAAGGCTAAATAAAAGAAC	HSPC
CA5BP1_1	CA5BP1	GGACTGATAGGGGCGTAACC	GMP
CA5BP1_2	CA5BP1	GAAATGACGTTTGCTGCGTA	GMP
CA5BP1_3	CA5BP1	GCAGGTGTGGACTCCGGCGC	GMP
CAHM_1	CAHM	GCGGGGGCGGCAGCCGACTA	GMP
CAHM_2	CAHM	GCCCGCCACGGCGCGGGTCT	GMP
CAHM_3	CAHM	CCCTCCGCACCGTGGGCGAC	GMP
CASC15_1	CASC15	TTCACAGTATCTCACTCACT	HSPC, CMP
CASC15_2	CASC15	TCTTCAAGGGAAGATAACAA	HSPC, CMP
CASC15_3	CASC15	GATAACAAAGGATGAAACAA	HSPC, CMP
CASC15_4	CASC15	TAAAGTTTCCGAGAGCGGCG	HSPC, CMP
CASC15_5	CASC15	TGCGAGTGAAGCGCGGGGCG	HSPC, CMP
CASC15_6	CASC15	GGCTGGTGCGAGTGAAGCGC	HSPC, CMP
CD36_1	CD36	ATATAAGCTAAGTACAAGGC	DSAMKL
CD36_2	CD36	ACTGATATAAGCTAAGTACA	DSAMKL
CD36_3	CD36	TGGGAGAATTAAAGGGAGGA	DSAMKL
CDCA4P2_1	CDCA4P2	CTGCCGCTGCAAGCTGTACG	HSC_SpotA, HSPC
CDCA4P2_2	CDCA4P2	GGGGAAACGTGTTGGCCACC	HSC_SpotA, HSPC
CDCA4P2_3	CDCA4P2	CGAGGACACGGTCTTCAAGC	HSC_SpotA, HSPC
CEP170P1_1	CEP170P1	TGTGAATGATGTAAGGATTC	HSC_SpotB
CEP170P1_2	CEP170P1	AAGGTGATATAAGTCTGTTC	HSC_SpotB
CEP170P1_3	CEP170P1	CTTGAAGATAAGCTGAGATT	HSC_SpotB
CLIP2_1	CLIP2	ACGAGAAGCATCAATGCTCC	GMP
CLIP2_2	CLIP2	GGCCCTACCCACTGCTGCTT	GMP
CLIP2_3	CLIP2	CTCTGTGACGGGGTCACACT	GMP
CNTN4-AS2_1	CNTN4-AS2	ATCATGAAGGCTTACTAGGT	GMP
CNTN4-AS2_2	CNTN4-AS2	TCCAGATACCTAAATCATGA	GMP
CNTN4-AS2_3	CNTN4-AS2	GCCTTCATGATTTAGGTATC	GMP
COL6A4P1_1	COL6A4P1	CTCTGTTAAGTGTAAGGGAT	GMP
COL6A4P1_2	COL6A4P1	CCATCCCTTACACTTAACAG	GMP
COL6A4P1_3	COL6A4P1	CCTCTGTTAAGTGTAAGGGA	GMP
CRYBB2P1_1	CRYBB2P1	AGAAGGGCGAGTACGCCCAC	HSC_SpotA
CRYBB2P1_2	CRYBB2P1	GCGAGTACGCCCACTGGGAC	HSC_SpotA
CRYBB2P1_3	CRYBB2P1	AGTACGCCCACTGGGACTGG	HSC_SpotA
CRYGFP_1	CRYGFP	CTTGCAGATCACCCTCTACG	HSPC
CRYGFP_2	CRYGFP	ATCACCCTCTACGAGGACCG	HSPC
CRYGFP_3	CRYGFP	GGAAGCCCCGGTCCTCGTAG	HSPC
CRYGGP_1	CRYGGP	CACCGCAGCACAGGAAGTAC	CMP
CRYGGP_2	CRYGGP	GCCCATCCACTGTCGGTGGT	CMP
CRYGGP_3	CRYGGP	ACTACGCCAACCACCGACAG	CMP
CTA-351J1.1_1	CTA-351J1.1	GGCGGCCATCGTGGCTAAGT	GMP
CTA-351J1.1_2	CTA-351J1.1	GTGGAGGTCGTACGCTGTGA	GMP
CTA-351J1.1_3	CTA-351J1.1	GGTGGAGGTCGTACGCTGTG	GMP
CTA-38K21.2_1	CTA-38K21.2	GATGGGTGCGCCTTGGCCGC	HSPC
CTA-38K21.2_2	CTA-38K21.2	TAAGCACCTTGGGATCTCGG	HSPC
CTA-38K21.2_3	CTA-38K21.2	GTGCTTAGATGGGTGCGCCT	HSPC
CTA-392E5.1_1	CTA-392E5.1	CTGCTGAGACTACCTGAGAC	DSAMKL
CTA-392E5.1_2	CTA-392E5.1	ACGTGGTGGCAGACAGGAGA	DSAMKL
CTA-392E5.1_3	CTA-392E5.1	TGCTGAGACTACCTGAGACT	DSAMKL
CTB-14A14.1_1	CTB-14A14.1	TGACGGGATCTTTGGCTGGC	GMP
CTB-14A14.1_2	CTB-14A14.1	CGAGACACCTTACTATGGGC	GMP
CTB-14A14.1_3	CTB-14A14.1	GGTCGGGGTGACGGGATCTT	GMP
CTC-463A16.1_1	CTC-463A16.1	TAGAAAATTTTTTCTAGGCC	DSAMKL
CTC-463A16.1_2	CTC-463A16.1	TTTTCTAGAAAATTTTTTCT	DSAMKL
CTC-463A16.1_3	CTC-463A16.1	AATTTTTTCTAGGCCGGGCG	DSAMKL
CTC-552D5.1_1	CTC-552D5.1	ATGCAAACTGGATCATCCCT	HSC_SpotA
CTC-552D5.1_2	CTC-552D5.1	GTGATAATACAAGGAATCCT	HSC_SpotA
CTC-552D5.1_3	CTC-552D5.1	AGCATGGTTAATATGCAAAC	HSC_SpotA
CTD-2024P10.1_1	CTD-2024P10.1	ACTCGGGGCCGCCGGGACTT	AMKL
CTD-2024P10.1_2	CTD-2024P10.1	CCGCCGGGACTTCGGGAGTA	AMKL
CTD-2024P10.1_3	CTD-2024P10.1	CCTTACTCCCGAAGTCCCGG	AMKL
CTD-2036J7.1_1	CTD-2036J7.1	TCTAGAAAACATGGAGTTGT	HSC_SpotA, HSPC
CTD-2036J7.1_2	CTD-2036J7.1	GAGGGGCCTTCTAGAAAACA	HSC_SpotA, HSPC
CTD-2036J7.1_3	CTD-2036J7.1	AAAACATGGAGTTGTAGGCC	HSC_SpotA, HSPC
CTD-2054N24.2_1	CTD-2054N24.2	CTGCTCCCGGGACCGCGACG	AMKL
CTD-2054N24.2_2	CTD-2054N24.2	CCCACCTCGGTGCGTGGCGA	AMKL
CTD-2054N24.2_3	CTD-2054N24.2	CCATGGTCGCCCTCAGTCAG	AMKL
CTD-2066L21.1_1	CTD-2066L21.1	TAAACCTGCTGCTGTGCGTG	HSC_SpotA
CTD-2066L21.1_2	CTD-2066L21.1	ATAAGGTGTGCTGTAAATCT	HSC_SpotA
CTD-2066L21.1_3	CTD-2066L21.1	TAGTTTCTGGGACAGCAGAC	HSC_SpotA
CTD-2203K17.1_1	CTD-2203K17.1	GACAAGTCGGCAGTCACGCC	CMP
CTD-2203K17.1_2	CTD-2203K17.1	GGCTTCGGCGCTTCCTGACC	CMP
CTD-2203K17.1_3	CTD-2203K17.1	TCCAGGGTTTCCCGCGGCTT	CMP
CTD-2228K2.7_1	CTD-2228K2.7	CCCAGTTCACTGCCCACTCG	GMP
CTD-2228K2.7_2	CTD-2228K2.7	CCCCCGAGTGGGCAGTGAAC	GMP
CTD-2228K2.7_3	CTD-2228K2.7	CCCACTCGGGGGGGATTTGA	GMP
CTD-2231E14.2_1	CTD-2231E14.2	CGGTTCCCGCAGGAATCAGC	GMP
CTD-2231E14.2_2	CTD-2231E14.2	ACGTGTCTGCTCCAGGCGGC	GMP
CTD-2231E14.2_3	CTD-2231E14.2	GCTGATTCCTGCGGGAACCG	GMP
CTD-2272G21.2_1	CTD-2272G21.2	AGGCCTAATAAAAGTAACCC	GMP
CTD-2272G21.2_2	CTD-2272G21.2	TCACCCAAATATCACTGGTG	GMP
CTD-2272G21.2_3	CTD-2272G21.2	CAACTCCTCTTGTCAACAGT	GMP
CTD-2377D24.4_1	CTD-2377D24.4	TACAGCCCGGCCTTTGAGCG	GMP
CTD-2377D24.4_2	CTD-2377D24.4	GGCGCGGCGGCCGCGCTCAA	GMP
CTD-2377D24.4_3	CTD-2377D24.4	GGCGGCCGCGCTCAAAGGCC	GMP
CTD-3060P21.1_1	CTD-3060P21.1	AGCTAACTGGTGGAGCGCGT	HSC_SpotA
CTD-3060P21.1_2	CTD-3060P21.1	CAGCTAACTGGTGGAGCGCG	HSC_SpotA
CTD-3060P21.1_3	CTD-3060P21.1	GTGCACTGGCTGACGGGGAC	HSC_SpotA
CTD-3157E16.2_1	CTD-3157E16.2	TTGATGATCAACTTAAACGC	DSAMKL
CTD-3157E16.2_2	CTD-3157E16.2	TTGATCATCAAAGGCTGGGC	DSAMKL
CTD-3157E16.2_3	CTD-3157E16.2	TAAGTTGATCATCAAAGGCT	DSAMKL
CTSG_1	CTSG	AACTGACTGGGCAGCCTTTC	GMP
CTSG_2	CTSG	GGATGAGGTCAGGCCTCTGA	GMP
CTSG_3	CTSG	GTGGCTGCATCTTTCCTGAA	GMP
DBH-AS1_1	DBH-AS1	AGATGGGCGCGAAGCTGTAC	GMP
DBH-AS1_2	DBH-AS1	GCGCTGCCATGGGCCCGGGT	GMP
DBH-AS1_3	DBH-AS1	GTCCTCAGCCGTCCGCTTCC	GMP
DCHS2_1	DCHS2	AGCAGAAGGAGCTTCCCGAC	HSC_SpotA
DCHS2_2	DCHS2	CTGCTGCCTGACCGCCCATG	HSC_SpotA
DCHS2_3	DCHS2	GGGGTGTATCTCTCCTCCCG	HSC_SpotA
DSCR8_1	DSCR8	CCCATGTTTACAGAAACGAG	HSC_SpotA
DSCR8_2	DSCR8	CAAGACGGCCCCTGCCAAGT	HSC_SpotA
DSCR8_3	DSCR8	CTCGTTTCTGTAAACATGGG	HSC_SpotA
DTX2P1-UPK3BP1-PMS2P11_1	DTX2P1-UPK3BP1-PMS2P11	AGCTGCGTCCCAGGCGTTCG	AMKL
DTX2P1-UPK3BP1-PMS2P11_2	DTX2P1-UPK3BP1-PMS2P11	GGCGGTAGCGGCCTGATACA	AMKL
DTX2P1-UPK3BP1-PMS2P11_3	DTX2P1-UPK3BP1-PMS2P11	GGCTGAACACCACGAACGCC	AMKL
DTX2P1-UPK3BP1-PMS2P11_4	DTX2P1-UPK3BP1-PMS2P11	GCGTTCGTGGTGTTCAGCCT	AMKL
DTX2P1-UPK3BP1-PMS2P11_5	DTX2P1-UPK3BP1-PMS2P11	GGGTTTGTTGTATGGTGCAA	AMKL
DUXAP8_1	DUXAP8	GAGCCGGGAGGGTTCCCGGT	DSAMKL
DUXAP8_2	DUXAP8	GTCTCCGCGGTAAGTGGCGG	DSAMKL
DUXAP8_3	DUXAP8	GACCCCACCGGGAACCCTCC	DSAMKL
E2F6P4_1	E2F6P4	CGTCTCCTCCGCCGGGTTAA	t8:21
E2F6P4_2	E2F6P4	CCTCCGCCGGGTTAATGGGC	t8:21
E2F6P4_3	E2F6P4	CCGCATTGGTGGCGTCTCGG	t8:21
EEF1A1P20_1	EEF1A1P20	TTGGGCAAGTACACCGCTAC	t8:21
EEF1A1P20_2	EEF1A1P20	GTTGATTCCACCACATTTGT	t8:21
EEF1A1P20_3	EEF1A1P20	CATATCAATATCGTTGTCAT	t8:21
EEF1A1P36_1	EEF1A1P36	CATGTTTAGATCAGTAGGGG	t8:21
EEF1A1P36_2	EEF1A1P36	CTACTGATCTAAACATGTGG	t8:21
EEF1A1P36_3	EEF1A1P36	CACCACATGTTTAGATCAGT	t8:21
EIF4A1P13_1	EIF4A1P13	ACTGTTTGAAGTGGACGGTT	GMP
EIF4A1P13_2	EIF4A1P13	ACCCGTAGAACTGTTTGAAG	GMP
EIF4A1P13_3	EIF4A1P13	GTCCACTTCAAACAGTTCTA	GMP
EIF4E2P1_1	EIF4E2P1	AAGAGGAAAGCTATTGTCCC	HSC_SpotA
EIF4E2P1_2	EIF4E2P1	ACCTTGAAAGATGATGACAC	HSC_SpotA
EIF4E2P1_3	EIF4E2P1	AGAATCAGAGCAGCAGCAAG	HSC_SpotA
ELL2P1_1	ELL2P1	GCATGTGAAGCTCACCGAGT	HSC_SpotA
ELL2P1_2	ELL2P1	GGGTCGCGGGGCAGCGCTAT	HSC_SpotA
ELL2P1_3	ELL2P1	GCTATGGGCTCTCGTGCGGA	HSC_SpotA
ETF1P1_1	ETF1P1	GTGCTGTAAGAGCTTCTGTA	t8:21
ETF1P1_2	ETF1P1	TCTGGATTCATCGTAATAGA	t8:21
ETF1P1_3	ETF1P1	CTTTCAGATGAAAGCAAGTC	t8:21
ETF1P2_1	ETF1P2	TAAGAGCTTGGAGGCGGGCT	t8:21
ETF1P2_2	ETF1P2	CACGTTCCTGTCCACAGCAC	t8:21
ETF1P2_3	ETF1P2	GGTGGACGACCCCAGTGCTG	t8:21
F10-AS1_1	F10-AS1	GACAGTAGAATCTCCTCCTG	HSC_SpotA
F10-AS1_2	F10-AS1	GTAGAATCTCCTCCTGAGGC	HSC_SpotA
F10-AS1_3	F10-AS1	CTCCTCCTGAGGCAGGACAA	HSC_SpotA
FAM13A-AS1_1	FAM13A-AS1	TTTACATGTTGGAGCAGATC	HSC_SpotA
FAM13A-AS1_2	FAM13A-AS1	GGAACAGAGTAACCTTTGGA	HSC_SpotA
FAM13A-AS1_3	FAM13A-AS1	GGTCTCAGCTGCCATCTCAA	HSC_SpotA
FGF14-AS2_1	FGF14-AS2	GAAGCCCGTGCCTGGCCCGT	GMP
FGF14-AS2_2	FGF14-AS2	GACCGGGGACTCTGGGCCAA	GMP
FGF14-AS2_3	FGF14-AS2	GCGAAGCCCCCGGCGAGCCG	GMP
FLJ46066_1	FLJ46066	GCGGAGTCATTTAAGAAGCG	AMKL
FLJ46066_2	FLJ46066	GCTATGGAGTAAATACATCC	AMKL
FLJ46066_3	FLJ46066	ATTTAAGAAGCGAGGTACTC	AMKL
FRG2FP_1	FRG2FP	GATGAGAAGAAACCGTTCAA	HSC_SpotA
FRG2FP_2	FRG2FP	GACGTGTAAGATAGTAGAGA	HSC_SpotA
FRG2FP_3	FRG2FP	CTGGTCAGTGGAACATTGGA	HSC_SpotA
FRG2FP_4	FRG2FP	CTCTACAATTTAAGTAGCAG	HSC_SpotA
FRG2FP_5	FRG2FP	GGGGCTGGTCAGTGGAACAT	HSC_SpotA
FTH1P21_1	FTH1P21	TATTCTAAGCTACATCATCG	t8:21
FTH1P21_2	FTH1P21	ACTTGGAGGTGTAGAGTTCC	t8:21
FTH1P21_3	FTH1P21	AAGACATGGACAAGTAGACT	t8:21
FTX_1	FTX	AGAGCTGGCCGTCCCAAGAT	AMKL
FTX_2	FTX	CCTGCTGTCCATTGCCGCTA	AMKL
FTX_3	FTX	GTTGCGGCTCGAGGCAAAGC	AMKL
FXYD6P3_1	FXYD6P3	ATACAGCCTGCTCGTCCCGG	HSC_SpotA
FXYD6P3_2	FXYD6P3	CCAGGACCACCGGGACGAGC	HSC_SpotA
FXYD6P3_3	FXYD6P3	TGTATACAGCCTGCTCGTCC	HSC_SpotA
GAPDHP75_1	GAPDHP75	CTGGTGACAGGTCCTCGATA	HSPC
GAPDHP75_2	GAPDHP75	AAACAAATTTGGCCATATCG	HSPC
GAPDHP75_3	GAPDHP75	CATATCGAGGACCTGTCACC	HSPC
GAS6_1	GAS6	CGGTGACAAGTCAGTGTGAC	HSC_SpotA
GAS6_2	GAS6	CTGTCACACTGACTTGTCAC	HSC_SpotA
GAS6_3	GAS6	CACACTGGTGCCTGTCACAC	HSC_SpotA
GDNF-AS1_1	GDNF-AS1	GCTTTCCTCGCGCCTGTCGA	HSPC
GDNF-AS1_2	GDNF-AS1	TCGCCCTCTCGCTTCTCCGC	HSPC
GDNF-AS1_3	GDNF-AS1	CGGGAAGGCCGGCCTTCGAC	HSPC
GDNF-AS1_4	GDNF-AS1	AGAAGGCCCAGAGCAGACGT	HSPC
GDNF-AS1_5	GDNF-AS1	AACTCACTCCTGAAGCTGAA	HSPC
GDNF-AS1_6	GDNF-AS1	CCTTCAGCATCTATTCTTTA	HSPC
GOLGA2P5_1	GOLGA2P5	GTGGCATTGATTGCATCGCC	t8:21
GOLGA2P5_2	GOLGA2P5	TGATTGCATCGCCCGGTTTG	t8:21
GOLGA2P5_3	GOLGA2P5	GAACAAAGCCGGGAAAGTAA	t8:21
GOLGA2P8_1	GOLGA2P8	TCCGACAACAAGACCGTTGC	GMP
GOLGA2P8_2	GOLGA2P8	GGCAACGGTCTTGTTGTCGG	GMP
GOLGA2P8_3	GOLGA2P8	GATGTCAGAAAAAACACGAC	GMP
GS1-204I12.3_1	GS1-204I12.3	ATGACTAACAGCATCACACG	HSC_SpotA
GS1-204I12.3_2	GS1-204I12.3	TAGCCATGGTTAAAATCTGA	HSC_SpotA
GS1-204I12.3_3	GS1-204I12.3	ACAAAAAGTTAGAATAGCCA	HSC_SpotA
GS1-259H13.7_1	GS1-259H13.7	TGGGAATTGTGGTCACCGAC	CMP
GS1-259H13.7_2	GS1-259H13.7	GTGGATCCTCATGTTGCGCC	CMP
GS1-259H13.7_3	GS1-259H13.7	ATGTTGCGCCTGGATGCGGC	CMP
GS1-541M1.2_1	GS1-541M1.2	CTAGAAGGAGGATTATTAAT	t8:21
GS1-541M1.2_2	GS1-541M1.2	CATTATGGAGAATTTCCATT	t8:21
GS1-541M1.2_3	GS1-541M1.2	GAAGGAGGATTATTAATAGG	t8:21
GTSE1_1	GTSE1	TCGGGAAGCCCGTGGAACCC	AMKL
GTSE1_2	GTSE1	GTTGCTTGGCACGGAGGCAC	AMKL
GTSE1_3	GTSE1	CTTTGGGTTGCTTGGCACGG	AMKL
HBBP1_1	HBBP1	GAGCATAACAGCTTTTCCGA	DSAMKL
HBBP1_2	HBBP1	ATGCTCACGGATGACCTCAA	DSAMKL
HBBP1_3	HBBP1	GTGTAGCAAAGGTGCCTTTG	DSAMKL
HCG20_1	HCG20	AGGACTAGGTATGTAGCTAT	HSC_SpotA
HCG20_2	HCG20	TAGGTATGTAGCTATTGGAG	HSC_SpotA
HCG20_3	HCG20	CCAAAATGGATTCACTATCA	HSC_SpotA
HHIP-AS1_1	HHIP-AS1	GCCTTCGGAACCAGCCTCGA	CMP
HHIP-AS1_2	HHIP-AS1	AGGCTGGTTCCGAAGGCTCG	CMP
HHIP-AS1_3	HHIP-AS1	ACCCTCGAGGCTGGTTCCGA	CMP
HK2P1_1	HK2P1	GAAGTAGGCAAGCAAATGCG	CMP
HK2P1_2	HK2P1	ACTGGTCAACCTTCTGCACT	CMP
HK2P1_3	HK2P1	GGTGCATGTGGTAGAGATAC	CMP
HLA-F-AS1_1	HLA-F-AS1	CAAAAAGGGCAGTGCGGATC	HSC_SpotA
HLA-F-AS1_2	HLA-F-AS1	GGTCCTCGGCGGAGCGGCAG	HSC_SpotA
HLA-F-AS1_3	HLA-F-AS1	GGCAGCGGCGGGGCGTTTCT	HSC_SpotA
HMGB1P13_1	HMGB1P13	GCATTCTTGTGCAAACTTGT	HSC_SpotA
HMGB1P13_2	HMGB1P13	GAAGCAGCACAAAGATGCTT	HSC_SpotA
HMGB1P13_3	HMGB1P13	TTTCTAAGACGTGCTCAGAG	HSC_SpotA
HMGB1P45_1	HMGB1P45	TCTTGTGAAAACTTGTCAGA	HSC_SpotA
HMGB1P45_2	HMGB1P45	TCTAAGAAGTGCTCAGAGAG	HSC_SpotA
HMGB1P45_3	HMGB1P45	GAAGTGCTCAGAGAGAGGCC	HSC_SpotA
HMGB1P4_1	HMGB1P4	TTTTGCCTCTCGGCTTCTTA	HSC_SpotA
HMGB1P4_2	HMGB1P4	GGAGACCCTAAGAAGCCGAG	HSC_SpotA
HMGB1P4_3	HMGB1P4	AGAAGTTGACTGAGGCATCT	HSC_SpotA
HMGB3P1_1	HMGB3P1	AGTGACCCCAGGAAACTAAG	HSC_SpotB
HMGB3P1_2	HMGB3P1	GAAGTGACCCCAGGAAACTA	HSC_SpotB
HMGB3P1_3	HMGB3P1	CATCTTGCCCCTTAGTTTCC	HSC_SpotB
HMGB4_1	HMGB4	AAAGGTGAACTTACGAACAT	HSC_SpotA
HMGB4_2	HMGB4	CTAGATTGCTCCTGGAGTGT	HSC_SpotA
HMGB4_3	HMGB4	AGCACTTTCTAGATTGCTCC	HSC_SpotA
HMGN1P19_1	HMGN1P19	AGCCCAAGAGGTGATCGGTA	HSC_SpotA
HMGN1P19_2	HMGN1P19	AACCATACCGATCACCTCTT	HSC_SpotA
HMGN1P19_3	HMGN1P19	AATAAAGCCAAGAAGTGGCG	HSC_SpotA
HMGN1P20_1	HMGN1P20	CGCCACAGGAAAAGCCTAAC	HSC_SpotA
HMGN1P20_2	HMGN1P20	TCTGCTGAAGGGGCCGCCAC	HSC_SpotA
HMGN1P20_3	HMGN1P20	AACAGCGCTGACCTCCTGTT	HSC_SpotA
HNRNPA1P23_1	HNRNPA1P23	ACGGCTCTTCAGAGTCTCGT	HSC_SpotA
HNRNPA1P23_2	HNRNPA1P23	ATTACCACACACCAACTGTG	HSC_SpotA
HNRNPA1P23_3	HNRNPA1P23	ATCTCTTATTACCACACAGT	HSC_SpotA
HNRNPA1P44_1	HNRNPA1P44	CTTCACTGGAGGGTTGAGCT	HSC_SpotB
HNRNPA1P44_2	HNRNPA1P44	CCAAGCGCTCCAGGGGCTTA	HSC_SpotB
HNRNPA1P44_3	HNRNPA1P44	CAGCAGAGGAAGCTCTTCAC	HSC_SpotB
HNRNPH1_1	HNRNPH1	TCTATGAAAAATCCTTTCCG	CMP
HNRNPH1_2	HNRNPH1	TTGGGAATGTATCCACGGAA	CMP
HNRNPH1_3	HNRNPH1	TAAGCTTGGGAATGTATCCA	CMP
HNRNPKP2_1	HNRNPKP2	GCGTTTACCAAATTCACCAC	HSC_SpotB
HNRNPKP2_2	HNRNPKP2	CACCACTGGTTTCAGTGTTA	HSC_SpotB
HNRNPKP2_3	HNRNPKP2	ACTGGTTTCAGTGTTAGGGA	HSC_SpotB
HOXA-AS3_1	HOXA-AS3	ACATATCCCAAGACAGTGGA	HSPC
HOXA-AS3_2	HOXA-AS3	TAAGACATATCCCAAGACAG	HSPC
HOXA-AS3_3	HOXA-AS3	CCCTCTCCCTCCACTGTCTT	HSPC
HOXA10-AS_1	HOXA10-AS	CGGGCGCCCCTGACCTTGAA	HSPC, CMP
HOXA10-AS_2	HOXA10-AS	CAGCCTTACAAGAGAATGGC	HSPC, CMP
HOXA10-AS_3	HOXA10-AS	GCTTTGGGCCATTCAAGGTC	HSPC, CMP
HOXA11-AS_1	HOXA11-AS	GTCCAATTTCTATAGCACCG	HSC_SpotA
HOXA11-AS_2	HOXA11-AS	CGAGACAGCCTACGGCACCC	HSC_SpotA
HOXA11-AS_3	HOXA11-AS	TAGAAATTGGACGAGACTGC	HSC_SpotA
HOXB-AS3_1	HOXB-AS3	GGATAGTTTGCTATCGACAA	HSPC, GMP
HOXB-AS3_2	HOXB-AS3	AGGGTCGTGGAGGCTCTACT	HSPC, GMP
HOXB-AS3_3	HOXB-AS3	AGTAGAGCCTCCACGACCCT	HSPC, GMP
HOXB-AS3_4	HOXB-AS3	AGCTTGGCCCAACTTCTTAC	HSPC, GMP
HOXB-AS3_5	HOXB-AS3	CAAGCTGGAAGGGATTGACC	HSPC, GMP
HOXB-AS3_6	HOXB-AS3	GGTAGCGGGTATACGCGGTC	HSPC, GMP
HOXB-AS3_7	HOXB-AS3	CCGTCCGGCCCGGTCATATC	HSPC, GMP
HOXB-AS3_8	HOXB-AS3	GGTCTGGTAGCGGGTATACG	HSPC, GMP
HOXB-AS3_9	HOXB-AS3	CTGTTCTCTAACTCACACCG	HSPC, GMP
HOXB-AS3_10	HOXB-AS3	CTAGCCCCAAACCTGGCGGC	HSPC, GMP
HOXB-AS3_11	HOXB-AS3	CTAGCTGAGAGCGTCGGTGT	HSPC, GMP
HOXC-AS1_1	HOXC-AS1	CCAGGAAATCGCAGGTCGCG	GMP
HOXC-AS1_2	HOXC-AS1	GTCCAGAGTTCCGGACCCCC	GMP
HOXC-AS1_3	HOXC-AS1	TGAGCTAGGAGCCGTCCTGA	GMP
HOXD-AS2_1	HOXD-AS2	GCTACAGGCGGCGGTCGGTC	AMKL
HOXD-AS2_2	HOXD-AS2	AGTGGATTACAGCAGACGCC	AMKL
HOXD-AS2_3	HOXD-AS2	GAAGCCGCGCCAGAACCGCG	AMKL
HSPC324_1	HSPC324	GGGCCCCCGACATTAGGGCA	HSC_SpotB, HSPC, GMP
HSPC324_2	HSPC324	CGGCCTTGCCCTAATGTCGG	HSC_SpotB, HSPC, GMP
HSPC324_3	HSPC324	CTGCGGCCTTGCCCTAATGT	HSC_SpotB, HSPC, GMP
IQCH-AS1_1	IQCH-AS1	CGGGCGCGTCCTCGGGCCTA	HSPC
IQCH-AS1_2	IQCH-AS1	ACGCGCCCGCAGCAGGCGAA	HSPC
IQCH-AS1_3	IQCH-AS1	GCGCGTCCTCGGGCCTAGGG	HSPC
ISM1-AS1_1	ISM1-AS1	GGAATGCCCAGGTTGGACCG	GMP
ISM1-AS1_2	ISM1-AS1	GATGAAGCCCCGGTCCAACC	GMP
ISM1-AS1_3	ISM1-AS1	TTTGTGCCACCAGGATACGT	GMP
KANTR_1	KANTR	GCCCCAGTAAAAGCTCGCGC	HSC_SpotB
KANTR_2	KANTR	CGGCGACGGCCGGAGGTGTA	HSC_SpotB
KANTR_3	KANTR	CACCCCTCGCGCGCTTCGGC	HSC_SpotB
KANTR_4	KANTR	GCCCCACCCCTCGCGCGCTT	HSC_SpotB
KANTR_5	KANTR	CTCTGGTGTCTGTGCGCGCG	HSC_SpotB
KCNH2_1	KCNH2	TGCCCATGGCCCCGTGGCGT	DSAMKL
KCNH2_2	KCNH2	GGCCCACGCCACGGGGCCAT	DSAMKL
KCNH2_3	KCNH2	GTCACCCTGGCAGTAAGCGT	DSAMKL
KCNH2_4	KCNH2	GGTTGCCAGTCGGCCAGCCT	DSAMKL
KCNH2_5	KCNH2	CACCCCCGAGGCTGGCCGAC	DSAMKL
KHDC1_1	KHDC1	AGGCCCAAAGATGGTTTACG	CMP
KHDC1_2	KHDC1	AGATGGTTTACGTGGCGTTG	CMP
KHDC1_3	KHDC1	CCCTCAGTTCAGTCGGTTAT	CMP
KHSRPP1_1	KHSRPP1	ACTCCAGATTTTGGTCTAGG	CMP
KHSRPP1_2	KHSRPP1	GAGAACTGATTGAGTCTCCC	CMP
KHSRPP1_3	KHSRPP1	TGGCCCCCTAGACCAAAATC	CMP
KLF3-AS1_1	KLF3-AS1	AGGAGGGGGTCACGGGTTCG	CMP
KLF3-AS1_2	KLF3-AS1	GGTTGAGGCGAGGCACCGTG	CMP
KLF3-AS1_3	KLF3-AS1	ATCTCCGTGCTCTCCGCGTG	CMP
KLF3-AS1_4	KLF3-AS1	CGTGCGGACCCCGGGTGCGG	CMP
KLF3-AS1_5	KLF3-AS1	GCGGAGAGCACGGAGATTTC	CMP
KRT18P16_1	KRT18P16	GGGCGCCGTAGCTGGTCGCC	GMP
KRT18P16_2	KRT18P16	CCCGGCGCCTGCATAGACTC	GMP
KRT18P16_3	KRT18P16	AGGCGACCAGCTACGGCGCC	GMP
KRT18P35_1	KRT18P35	CCCCATGGCTGCATAGACAC	HSPC
KRT18P35_2	KRT18P35	CCAGTGTCTATGCAGCCATG	HSPC
KRT18P35_3	KRT18P35	CATGGGGGGGCTTTGGTTTC	HSPC
KRT18P39_1	KRT18P39	TGACCAGTGGGCGCGGTAGC	GMP
KRT18P39_2	KRT18P39	ACACTTCTGACCAGTGGGCG	GMP
KRT18P39_3	KRT18P39	CGCCCAGCTACCGCGCCCAC	GMP
LA16c-349E10.1_1	LA16c-349E10.1	GCCTAAGAGTGGTGGCCTCG	CMP
LA16c-349E10.1_2	LA16c-349E10.1	CGCGGGGCAGCCTCACGGAA	CMP
LA16c-349E10.1_3	LA16c-349E10.1	ACACACTACCCACGTCCCAC	CMP
LINC00152_1	LINC00152	TGATGTACACACGACTAAGA	DSAMKL
LINC00152_2	LINC00152	TTAGTCGTGTGTACATCATT	DSAMKL
LINC00152_3	LINC00152	CGTGTGTACATCATTGGGAA	DSAMKL
LINC00158_1	LINC00158	ATCTAAGCTTCTGCTGTGTA	HSC_SpotA
LINC00158_2	LINC00158	TTCTGCTGTGTATGGACCTG	HSC_SpotA
LINC00158_3	LINC00158	TTCATACAGCTACAAGTTTG	HSC_SpotA
LINC00173_1	LINC00173	GCTCTAAGCGCTTGGTACCA	AMKL
LINC00173_2	LINC00173	AGGACGCTTGCGGGATAGGG	AMKL
LINC00173_3	LINC00173	GGGAGGACGCTTGCGGGATA	AMKL
LINC00202-2_1	LINC00202-2	CCACAAATGGGGCCAGCTAA	HSC_SpotA
LINC00202-2_2	LINC00202-2	AGACGCAGCCCGCAATATAC	HSC_SpotA
LINC00202-2_3	LINC00202-2	ACTCTGCTCCTGTATATTGC	HSC_SpotA
LINC00307_1	LINC00307	CAGTTGAAGATCCATTTCCC	HSC_SpotA
LINC00307_2	LINC00307	ATGGATCTTCAACTGAATTA	HSC_SpotA
LINC00307_3	LINC00307	AATTATATAGCCCTGGGAAA	HSC_SpotA
LINC00327_1	LINC00327	TATTGCAATCTTATCGGAGA	AMKL
LINC00327_2	LINC00327	CTAATGTGCCTGGAACTTGC	AMKL
LINC00327_3	LINC00327	ATTGCAATATCTTTGGGTGC	AMKL
LINC00337_1	LINC00337	GGTAGCTCAGAGAGCTGCGC	HSC_SpotA
LINC00337_2	LINC00337	TATTCCAGTTGTTCACTTAC	HSC_SpotA
LINC00337_3	LINC00337	AGAGTAAATTCTCTCACCTC	HSC_SpotA
LINC00380_1	LINC00380	AGTCAGGTTCATAACGGATA	GMP
LINC00380_2	LINC00380	TTACCAAAGTTGATTGAGGT	GMP
LINC00380_3	LINC00380	TCAATTACCAAAGTTGATTG	GMP
LINC00421_1	LINC00421	CAGACAGGCGCTCTCGCCTA	AMKL
LINC00421_2	LINC00421	GTGCTCAGCCTCAGAGCCGT	AMKL
LINC00421_3	LINC00421	CGCTCTCGCCTACGGCTCTG	AMKL
LINC00479_1	LINC00479	GAGTTCAAAGTGCCTAACAC	AMKL
LINC00479_2	LINC00479	AGCGGGGAGACCAGACTTAG	AMKL
LINC00479_3	LINC00479	TTAGGCACTTTGAACTCTCC	AMKL
LINC00710_1	LINC00710	AGATCTGAAGATACGCCCCT	HSC_SpotA
LINC00710_2	LINC00710	GCTCAGCGTGCAGAAGACCG	HSC_SpotA
LINC00710_3	LINC00710	TGCCCGAGCATCATGTTCGG	HSC_SpotA
LINC00710_4	LINC00710	CACTGCCCGAGCATCATGTT	HSC_SpotA
LINC00710_5	LINC00710	AGCCACCGAACATGATGCTC	HSC_SpotA
LINC00951_1	LINC00951	AAAGTCACACAAGATTATCG	GMP
LINC00951_2	LINC00951	TCATGAAGGTTCCGCCTGCC	GMP
LINC00951_3	LINC00951	ATGAAGGTTCCGCCTGCCTG	GMP
LINC00977_1	LINC00977	CTCACATTGAACATTGCACT	AMKL
LINC00977_2	LINC00977	CTTGGGTGTGTTTCAAGAGC	AMKL
LINC00977_3	LINC00977	CAAGAGCAGGAGCCGGCAAG	AMKL
LINC00982_1	LINC00982	AGGCGCGGAGTTGCACGTGT	HSC_SpotA, HSPC, CMP, GMP
LINC00982_2	LINC00982	ACTCCGCGCCTCCGCGTTAA	HSC_SpotA, HSPC, CMP, GMP
LINC00982_3	LINC00982	TTTCACCTCCTTTAACGCGG	HSC_SpotA, HSPC, CMP, GMP
LINC00982_4	LINC00982	GAACTGCAAGCCACTCATCG	HSC_SpotA, HSPC, CMP, GMP
LINC00982_5	LINC00982	AGAGCCTCTGGGAGTAGTGC	HSC_SpotA, HSPC, CMP, GMP
LINC00982_6	LINC00982	GATGAGTGGCTTGCAGTTCC	HSC_SpotA, HSPC, CMP, GMP
LINC01015_1	LINC01015	CTTGATGGGCTTGGAGACTC	GMP
LINC01015_2	LINC01015	TAGCAAAACTTGCTCTTGAT	GMP
LINC01015_3	LINC01015	CTTATGAAGCACATGGTGAG	GMP
LINC01017_1	LINC01017	TTCATGGCCAAACTTCTGGG	HSC_SpotA
LINC01017_2	LINC01017	GGCTCTTGCTGGGCCTGCGG	HSC_SpotA
LINC01017_3	LINC01017	TTCCTTCATGGCCAAACTTC	HSC_SpotA
LINC01048_1	LINC01048	CATGAACTCACAATTCTATG	AMKL
LINC01048_2	LINC01048	CTTATAAATTATCGAGTCTC	AMKL
LINC01048_3	LINC01048	AACTCACAATTCTATGTGGC	AMKL
LINC01135_1	LINC01135	ACGCAGTAGTACTCGGAGCC	AMKL
LINC01135_2	LINC01135	ACACTTTCGTCCCTAAGGGG	AMKL
LINC01135_3	LINC01135	CGGGTGGTGGGCGCATATCC	AMKL
LINC01135_4	LINC01135	GGGGGAGAATAAAATAACCG	AMKL
LINC01135_5	LINC01135	GCAGTAGTACTCGGAGCCCG	AMKL
LINC01273_1	LINC01273	ACGGGTTACAGAGACGACGG	GMP
LINC01273_2	LINC01273	AGGCAGAGGCCGAACGGGAT	GMP
LINC01273_3	LINC01273	GTTGCGGTGTTCAGGGGTTT	GMP
LINC01296_1	LINC01296	TGAGTTGGCTGTCAAAAACT	DSAMKL
LINC01296_2	LINC01296	TAAAGGAAAGTGTCTTGAGT	DSAMKL
LINC01296_3	LINC01296	AGTCAATTGAAAAAGTGTAA	DSAMKL
LINC01331_1	LINC01331	TAAGGTGTTAATTGGTCTCT	HSC_SpotA
LINC01331_2	LINC01331	GTTTCTTAAACAGGACTGTT	HSC_SpotA
LINC01331_3	LINC01331	ACTATCTGCAAATACCAGAA	HSC_SpotA
LINC01341_1	LINC01341	GGCCCGCGTGGGCTACTGCT	CMP
LINC01341_2	LINC01341	CAGCGGCGGGCGGCCCGCGT	CMP
LINC01341_3	LINC01341	TACTGCTGGGGGCTGCGTTC	CMP
LINC01358_1	LINC01358	TGGAGAAGTATCTCCTACCC	CMP
LINC01358_2	LINC01358	TCTCCAGGCTCTCACTTATG	CMP
LINC01358_3	LINC01358	AGGGTAGGAGATACTTCTCC	CMP
LINC01545_1	LINC01545	CATGGTGGCGTGCACCTGGG	CMP
LINC01545_2	LINC01545	AGGCATGGTGGCGTGCACCT	CMP
LINC01545_3	LINC01545	GGCGTGCACCTGGGAGGCTG	CMP
LINC01550_1	LINC01550	AAGAGCCGGGGATTGGGACG	HSC_SpotA
LINC01550_2	LINC01550	ATTTGGTAAGAGCCGGGGAT	HSC_SpotA
LINC01550_3	LINC01550	CACCGAGCTTGCACAGGGCG	HSC_SpotA
lnc-ABCA1-5_1	lnc-ABCA1-5	AGTATTGATATCTGTGGCTC	HSC_SpotA
lnc-ABCA1-5_2	lnc-ABCA1-5	TCTTGAAAACAGTGTACCAT	HSC_SpotA
lnc-ABCA1-5_3	lnc-ABCA1-5	TACTCACCTTGAATTTAAAC	HSC_SpotA
lnc-ABCG1-2_1	lnc-ABCG1-2	CCTTGGTTGTCTCACGCCAC	CMP
lnc-ABCG1-2_2	lnc-ABCG1-2	CCAGTGGCGTGAGACAACCA	CMP
lnc-ABCG1-2_3	lnc-ABCG1-2	CAAAAATAACATCGGCTCTT	CMP
lnc-ACBD6-2_1	lnc-ACBD6-2	CCCAAGGCAGGGGGTAGCGT	HSC_SpotA
lnc-ACBD6-2_2	lnc-ACBD6-2	GTGGGAATCAAGCATGTGTA	HSC_SpotA
lnc-ACBD6-2_3	lnc-ACBD6-2	GAAGTTAGAAGGGTCTGGCG	HSC_SpotA
lnc-ANGPT2-8_1	lnc-ANGPT2-8	GGATCTGGGTGAATGGCTTA	HSC_SpotA
lnc-ANGPT2-8_2	lnc-ANGPT2-8	GACATTTGGATCTGGGTGAA	HSC_SpotA
lnc-ANGPT2-8_3	lnc-ANGPT2-8	CAATGGTGACATTTGGATCT	HSC_SpotA
lnc-ANTXRL-4_1	lnc-ANTXRL-4	ATACATCATGCTCAATAATA	HSC_SpotA
lnc-ANTXRL-4_2	lnc-ANTXRL-4	AAAATATAGCTAAGGTGAAC	HSC_SpotA
lnc-ANTXRL-4_3	lnc-ANTXRL-4	CAAAAGGGAAAATATAGCTA	HSC_SpotA
lnc-ATAD5-3_1	lnc-ATAD5-3	GCCGGCCCGAAAACCCGTGC	HSC_SpotA
lnc-ATAD5-3_2	lnc-ATAD5-3	GACTCCCCGCTCCAACGCGG	HSC_SpotA
lnc-ATAD5-3_3	lnc-ATAD5-3	TCCAGCACGGGTTTTCGGGC	HSC_SpotA
lnc-ATAD5-3_4	lnc-ATAD5-3	CTGGACCCCCGCGTTGGAGC	HSC_SpotA
lnc-ATAD5-3_5	lnc-ATAD5-3	GACGTGCTGGACCCCCGCGT	HSC_SpotA
lnc-C11orf35-3_1	lnc-C11orf35-3	TGGAATAGCCGGCTCACGGA	HSC_SpotB
lnc-C11orf35-3_2	lnc-C11orf35-3	CGATTCACCGCGCCTGCTGC	HSC_SpotB
lnc-C11orf35-3_3	lnc-C11orf35-3	TGTGCCGTCCCGTGTGGATT	HSC_SpotB
lnc-C11orf35-3_4	lnc-C11orf35-3	TGTTCAGAGGAGCGCGGCGC	HSC_SpotB
lnc-C11orf35-3_5	lnc-C11orf35-3	GCGCGGTGAATCGTGCGCGC	HSC_SpotB
lnc-C1QTNF5-2_1	lnc-C1QTNF5-2	TACTAACCCCAACGCCTACC	HSC_SpotA
lnc-C1QTNF5-2_2	lnc-C1QTNF5-2	CTGTGCCCTGGTAGGCGTTG	HSC_SpotA
lnc-C1QTNF5-2_3	lnc-C1QTNF5-2	CTGCCTGTGATCGTCTGATG	HSC_SpotA
lnc-C5orf43-3_1	lnc-C5orf43-3	ATGGTGGATACGCTTTGTGA	CMP
lnc-C5orf43-3_2	lnc-C5orf43-3	GGTAAAAAGCAATTGACAAA	CMP
lnc-C5orf43-3_3	lnc-C5orf43-3	AATTTACATTTAAAACTGTT	CMP
lnc-C9orf125-2_1	lnc-C9orf125-2	CTTAGTCCATAGAAGACGCT	DSAMKL
lnc-C9orf125-2_2	lnc-C9orf125-2	AGTTTGCCAAGCGTCTTCTA	DSAMKL
lnc-C9orf125-2_3	lnc-C9orf125-2	CTATGGACTAAGCACTTGCT	DSAMKL
lnc-CCDC8-1_1	lnc-CCDC8-1	GCTGGGCTCGGGAAAACGGA	GMP
lnc-CCDC8-1_2	lnc-CCDC8-1	CGGGAAAACGGAAGGGCCAT	GMP
lnc-CCDC8-1_3	lnc-CCDC8-1	CTGGGCTCGGGAAAACGGAA	GMP
lnc-CHD1L-5_1	lnc-CHD1L-5	GCATCTGTGTGTTAGGCGAC	AMKL
lnc-CHD1L-5_2	lnc-CHD1L-5	TGTTAGGCGACCGGAGAGGT	AMKL
lnc-CHD1L-5_3	lnc-CHD1L-5	CGTCCCCAAATGACACTCGG	AMKL
lnc-CHST3-1_1	lnc-CHST3-1	GTGGGGATGTCACACCACAT	HSC_SpotA
lnc-CHST3-1_2	lnc-CHST3-1	AGCTGAGGTCCTCCCAAAAC	HSC_SpotA
lnc-CHST3-1_3	lnc-CHST3-1	CTCCCAAAACTGGGCCGATG	HSC_SpotA
lnc-DUT-1_1	lnc-DUT-1	AATGGTGTTAAAGCAGTCTA	AMKL
lnc-DUT-1_2	lnc-DUT-1	ATTGTCTTCTGGATAACTCA	AMKL
lnc-DUT-1_3	lnc-DUT-1	TAATCAAAATGATTGTCTTC	AMKL
lnc-ELOVL5-1_1	lnc-ELOVL5-1	CAAAGTGCTGATACTATCTT	HSC_SpotA
lnc-ELOVL5-1_2	lnc-ELOVL5-1	AAAGTGCTGATACTATCTTC	HSC_SpotA
lnc-ELOVL5-1_3	lnc-ELOVL5-1	CAGCACTTTGTTCTTGCCTC	HSC_SpotA
lnc-FAM131B-1_1	lnc-FAM131B-1	CCTCATCCTCAATCTAACGC	HSC_SpotA
lnc-FAM131B-1_2	lnc-FAM131B-1	ATATTTCCAGCGTTAGATTG	HSC_SpotA
lnc-FAM131B-1_3	lnc-FAM131B-1	CAATCTAACGCTGGAAATAT	HSC_SpotA
lnc-FBXO18-1_1	lnc-FBXO18-1	TAGGGTGTAGCTGAAACCCG	HSC_SpotA
lnc-FBXO18-1_2	lnc-FBXO18-1	GGCATGGACGACAACGCTTC	HSC_SpotA
lnc-FBXO18-1_3	lnc-FBXO18-1	AGCGTTGTCGTCCATGCCTC	HSC_SpotA
lnc-GTPBP8-3_1	lnc-GTPBP8-3	TCAGCGACAGTATGACGAGA	AMKL
lnc-GTPBP8-3_2	lnc-GTPBP8-3	CTGTTTCTGCATCTAAGGTT	AMKL
lnc-GTPBP8-3_3	lnc-GTPBP8-3	TAATTACAGCTGCAATGCAA	AMKL
lnc-HBEGF-2_1	lnc-HBEGF-2	TCCCACCTGTCGCTCTCCGC	HSC_SpotA
lnc-HBEGF-2_2	lnc-HBEGF-2	GTAGAAGTTTCACCAAGCGC	HSC_SpotA
lnc-HBEGF-2_3	lnc-HBEGF-2	CTGGGCGCCGAGACTATGGC	HSC_SpotA
lnc-HBEGF-2_4	lnc-HBEGF-2	ATCCCGGTGCAGCTATTCTC	HSC_SpotA
lnc-HBEGF-2_5	lnc-HBEGF-2	CTATTCTCCGGCCATAGTCT	HSC_SpotA
lnc-HDDC3-6_1	lnc-HDDC3-6	TTCATAAGGCACAGACTTGA	GMP
lnc-HDDC3-6_2	lnc-HDDC3-6	AAAAGCTTATTAGATTCATA	GMP
lnc-HDDC3-6_3	lnc-HDDC3-6	TAAGCTTTTGCTTTTATATC	GMP
lnc-HMGB2-16_1	lnc-HMGB2-16	TATAAACAGACCCGGACGCG	t8:21
lnc-HMGB2-16_2	lnc-HMGB2-16	GGGTCTGTTTATATAGCGTC	t8:21
lnc-HMGB2-16_3	lnc-HMGB2-16	GCGGAGGGCGAGCGTGACGC	t8:21
lnc-IFI27L1-2_1	lnc-IFI27L1-2	GTGATAGCAGTACAGGCTAA	DSAMKL
lnc-IFI27L1-2_2	lnc-IFI27L1-2	CACAGGAGTGATAGCAGTAC	DSAMKL
lnc-IFI27L1-2_3	lnc-IFI27L1-2	GGACTTCCAAGCCCTCCATC	DSAMKL
lnc-JAK1-7_1	lnc-JAK1-7	CGGCCGCCCCTACAGGGGGA	AMKL
lnc-JAK1-7_2	lnc-JAK1-7	CTCGCCGGCCGCCCCTACAG	AMKL
lnc-JAK1-7_3	lnc-JAK1-7	AAAGTTCCCGGGGCTTCCTC	AMKL
lnc-KCNMA1-2_1	lnc-KCNMA1-2	CCCTTATGGCTACAAAAGAG	HSPC
lnc-KCNMA1-2_2	lnc-KCNMA1-2	AGTATGAGAATAGATAATAC	HSPC
lnc-KCNMA1-2_3	lnc-KCNMA1-2	GCTACAAAAGAGGGGAGAAT	HSPC
lnc-LANCL2-7_1	lnc-LANCL2-7	TTCTGTAAAGCGTCTCCCTC	HSC_SpotA
lnc-LANCL2-7_2	lnc-LANCL2-7	TGCAGCCACCGGCTGGTGGA	HSC_SpotA
lnc-LANCL2-7_3	lnc-LANCL2-7	CGCAGCTCCTCTCTCCTGAT	HSC_SpotA
lnc-LUC7L-2_1	lnc-LUC7L-2	ACCGCAGGGGTGAACTCGGC	DSAMKL
lnc-LUC7L-2_2	lnc-LUC7L-2	ACCTCCAAATACCGTTAAGC	DSAMKL
lnc-LUC7L-2_3	lnc-LUC7L-2	TCCAGGGAGGCGTGCACCGC	DSAMKL
lnc-MAP7-1_1	lnc-MAP7-1	TACATAACCGCACCACCTCG	CMP
lnc-MAP7-1_2	lnc-MAP7-1	TATAGTAACACACCACGAGG	CMP
lnc-MAP7-1_3	lnc-MAP7-1	ACGAGGTGGTGCGGTTATGT	CMP
lnc-MDFI-2_1	lnc-MDFI-2	CAGCACTGTTTGGGGCCTAC	GMP
lnc-MDFI-2_2	lnc-MDFI-2	TGGGAGCACCTCAGCTCCGA	GMP
lnc-MDFI-2_3	lnc-MDFI-2	GGTGTGGCCCACTCTAGCTC	GMP
lnc-MRGPRX4-2_1	lnc-MRGPRX4-2	AATACAGCGAGAGTCTCATA	HSC_SpotB
lnc-MRGPRX4-2_2	lnc-MRGPRX4-2	CTCTCGCTGTATTGCTATTT	HSC_SpotB
lnc-MRGPRX4-2_3	lnc-MRGPRX4-2	AGCTTGATTTGAAATTATGC	HSC_SpotB
lnc-MYO19-1_1	lnc-MYO19-1	CTAGTTCGGGTCTAGCGGAA	HSC_SpotB
lnc-MYO19-1_2	lnc-MYO19-1	TTCGGGTCTAGCGGAATGGC	HSC_SpotB
lnc-MYO19-1_3	lnc-MYO19-1	AGACGACACCCTGACGTCGA	HSC_SpotB
lnc-MYO19-1_4	lnc-MYO19-1	CATTCCGCTAGACCCGAACT	HSC_SpotB
lnc-MYO19-1_5	lnc-MYO19-1	GAAGGCTTCCCCACGGACGA	HSC_SpotB
lnc-NEMF-1_1	lnc-NEMF-1	TTCGCAGCGTCTCCGACCGC	AMKL
lnc-NEMF-1_2	lnc-NEMF-1	TGCAGGGCAGTTACGTCATT	AMKL
lnc-NEMF-1_3	lnc-NEMF-1	GCGTCTCCGACCGCCGGGCG	AMKL
lnc-NIPSNAP3B-1_1	lnc-NIPSNAP3B-1	CGATGTCCTAGTACGAGCTC	GMP
lnc-NIPSNAP3B-1_2	lnc-NIPSNAP3B-1	GCTTGGGGCTTGCCCGACGG	GMP
lnc-NIPSNAP3B-1_3	lnc-NIPSNAP3B-1	TGCTCCCCGGTCTCCACCGT	GMP
lnc-NLRP3-1_1	lnc-NLRP3-1	GGCCGACCTTCCGGACCGGC	GMP
lnc-NLRP3-1_2	lnc-NLRP3-1	CGCGGGCCCGCCGGTCCGGA	GMP
lnc-NLRP3-1_3	lnc-NLRP3-1	GCCGGTCCGGAAGGTCGGCC	GMP
lnc-NR0B1-2_1	lnc-NR0B1-2	GGGTGGGGTAGTCAAAGAAC	HSC_SpotA
lnc-NR0B1-2_2	lnc-NR0B1-2	ACTGTAGATACACTCAGTAC	HSC_SpotA
lnc-NR0B1-2_3	lnc-NR0B1-2	AAGCAGATTGCTTCTTACAT	HSC_SpotA
lnc-NRF1-2_1	lnc-NRF1-2	ATACTGGCTTTACTCAGGGC	HSPC
lnc-NRF1-2_2	lnc-NRF1-2	CTTAAATACTGGCTTTACTC	HSPC
lnc-NRF1-2_3	lnc-NRF1-2	TACTGGCTTTACTCAGGGCT	HSPC
lnc-OR2G2-1_1	lnc-OR2G2-1	GAGGGTCAATGAGAGCTCGC	CMP
lnc-OR2G2-1_2	lnc-OR2G2-1	GCTGGAGACGGTCCCGTTTG	CMP
lnc-OR2G2-1_3	lnc-OR2G2-1	GGAGGGTCAATGAGAGCTCG	CMP
lnc-P2RY1-3_1	lnc-P2RY1-3	TGGTGCTGGTGCAGTGTACG	HSC_SpotA
lnc-P2RY1-3_2	lnc-P2RY1-3	CTGCATGATAAAGCTTGATC	HSC_SpotA
lnc-P2RY1-3_3	lnc-P2RY1-3	AGCTTGATCGGGTTCTCACT	HSC_SpotA
lnc-P2RY1-3_4	lnc-P2RY1-3	TGATCGGGTTCTCACTGGGA	HSC_SpotA
lnc-P2RY1-3_5	lnc-P2RY1-3	TCATCATTTGGGGATGCAAC	HSC_SpotA
lnc-PHB-2_1	lnc-PHB-2	CTACTCATGATGGCTGAAGT	AMKL
lnc-PHB-2_2	lnc-PHB-2	GCTACTCATGATGGCTGAAG	AMKL
lnc-PHB-2_3	lnc-PHB-2	CTTCAGCCATCATGAGTAGC	AMKL
lnc-PPP1R15A-2_1	lnc-PPP1R15A-2	TGGAGGTACCGCCGGAGATC	AMKL
lnc-PPP1R15A-2_2	lnc-PPP1R15A-2	TCCCCATTGCGGGCCCGGGA	AMKL
lnc-PPP1R15A-2_3	lnc-PPP1R15A-2	TCCCCTCCCGGGCCCGCAAT	AMKL
lnc-RAB27B-3_1	lnc-RAB27B-3	ATTTCCTTAGTGGGTGAATA	GMP
lnc-RAB27B-3_2	lnc-RAB27B-3	CTTAGTGGGTGAATAAGGGC	GMP
lnc-RAB27B-3_3	lnc-RAB27B-3	CTGCCCTTATTCACCCACTA	GMP
lnc-RB1CC1-1_1	lnc-RB1CC1-1	GGGCGCGAGTCGGTTTCCCC	GMP
lnc-RB1CC1-1_2	lnc-RB1CC1-1	CGGCATGGCCGCGCATCACC	GMP
lnc-RB1CC1-1_3	lnc-RB1CC1-1	CGCTTCCGATCTGCTAGGTC	GMP
lnc-RNF135-1_1	lnc-RNF135-1	GTTTGATTTCTAATGGATTG	t8:21
lnc-RNF135-1_2	lnc-RNF135-1	TTTCAAAAACTACGAAACAC	t8:21
lnc-RNF135-1_3	lnc-RNF135-1	ATGATAGGTTTGATTTCTAA	t8:21
lnc-RNF146-1_1	lnc-RNF146-1	GTCTTATTACTCCATTGCCC	HSC_SpotA
lnc-RNF146-1_2	lnc-RNF146-1	ACGTGTAGTTGCAGCTACTC	HSC_SpotA
lnc-RNF146-1_3	lnc-RNF146-1	TATTACTCCATTGCCCAGGC	HSC_SpotA
lnc-RPAP1-2_1	lnc-RPAP1-2	TTCTAAAACTACAGGGATCT	HSC_SpotA
lnc-RPAP1-2_2	lnc-RPAP1-2	GAGCTAGTAAGTGAATAAGT	HSC_SpotA
lnc-RPAP1-2_3	lnc-RPAP1-2	AGTATATATTCTAAAACTAC	HSC_SpotA
lnc-RUNDC3A-1_1	lnc-RUNDC3A-1	TTAAGGAATTAACAAGGGTC	HSPC
lnc-RUNDC3A-1_2	lnc-RUNDC3A-1	GGGAGACTACACCAGGCTGA	HSPC
lnc-RUNDC3A-1_3	lnc-RUNDC3A-1	CTGTAGCTGGGCATGTCTCC	HSPC
lnc-SCAF11-4_1	lnc-SCAF11-4	TTCCACCCTTAGCATAATCG	HSC_SpotA
lnc-SCAF11-4_2	lnc-SCAF11-4	AACCACGATTATGCTAAGGG	HSC_SpotA
lnc-SCAF11-4_3	lnc-SCAF11-4	CTAAAACCACGATTATGCTA	HSC_SpotA
lnc-SDCBP-2_1	lnc-SDCBP-2	AGGGACTCGAGCCGATCGAA	CMP
lnc-SDCBP-2_2	lnc-SDCBP-2	GTGAGTGGGCAACTGTCCGA	CMP
lnc-SDCBP-2_3	lnc-SDCBP-2	GCTGGTCCTCACCCTTCGAT	CMP
lnc-SPDYE1-1_1	lnc-SPDYE1-1	AAAGTGCAGTTGGTGGATGT	GMP
lnc-SPDYE1-1_2	lnc-SPDYE1-1	CACATCCACCAACTGCACTT	GMP
lnc-SPDYE1-1_3	lnc-SPDYE1-1	GCCTCCCAAAGTGCAGTTGG	GMP
lnc-STOM-1_1	lnc-STOM-1	TGTGGACAGGTTTGCGAATC	HSPC
lnc-STOM-1_2	lnc-STOM-1	AGATTCGCAAACCTGTCCAC	HSPC
lnc-STOM-1_3	lnc-STOM-1	AAGCCCAGGATGTGACGCAC	HSPC
lnc-TAB2-1_1	lnc-TAB2-1	TCTCGTAGTTCTGCTATGAA	GMP
lnc-TAB2-1_2	lnc-TAB2-1	TAGCAGAACTACGAGACAAG	GMP
lnc-TAB2-1_3	lnc-TAB2-1	GTCTGAAATGTTAAGTATGG	GMP
lnc-TH-1_1	lnc-TH-1	AAAAAGCTCCTGAGCCAACC	GMP
lnc-TH-1_2	lnc-TH-1	GGCATGACCCTTTCCTTCAC	GMP
lnc-TH-1_3	lnc-TH-1	TGCCAAGGGGACATAGACAG	GMP
lnc-THADA-4_1	lnc-THADA-4	CACATCTGGGCTCACTACAT	HSC_SpotA, HSPC, CMP
lnc-THADA-4_2	lnc-THADA-4	CCCCTTTGCCTGGGCACATC	HSC_SpotA, HSPC, CMP
lnc-THADA-4_3	lnc-THADA-4	TAGTGAGCCCAGATGTGCCC	HSC_SpotA, HSPC, CMP
lnc-TMEM160-1_1	lnc-TMEM160-1	TCTGCAGATCAGAACAACGG	t8:21
lnc-TMEM160-1_2	lnc-TMEM160-1	CGGGGAGTCCCACACTCTCT	t8:21
lnc-TMEM160-1_3	lnc-TMEM160-1	TGCCAGGGAATGTTTCGGGA	t8:21
lnc-YIF1A-7_1	lnc-YIF1A-7	CTGTGGACACTTCCCTACCG	HSC_SpotA
lnc-YIF1A-7_2	lnc-YIF1A-7	GCATGGCCTCAGCCCCGGTA	HSC_SpotA
lnc-YIF1A-7_3	lnc-YIF1A-7	AATTTGTGCTTCTGCGTCAC	HSC_SpotA
lnc-ZNF446-1_1	lnc-ZNF446-1	ATCGCTTCAACCTGGGAGGC	HSC_SpotA
lnc-ZNF446-1_2	lnc-ZNF446-1	TCCCGAGTAGCTGGAAACAC	HSC_SpotA
lnc-ZNF446-1_3	lnc-ZNF446-1	TGTGTTTCCAGCTACTCGGG	HSC_SpotA
lnc-ZNF680-42_1	lnc-ZNF680-42	TGTCATCGTGAGAGAGGGGT	t8:21
lnc-ZNF680-42_2	lnc-ZNF680-42	GCTAAAAGACCGGGACCCCC	t8:21
lnc-ZNF680-42_3	lnc-ZNF680-42	GGTCTGTCATCGTGAGAGAG	t8:21
LRRC34_1	LRRC34	GCGGACTGTAAGTGCGCGCG	t8:21
LRRC34_2	LRRC34	CAGCCTGCTTCGAGTCCCGC	t8:21
LRRC34_3	LRRC34	AAGTGCGCGCGCGGTCGCCA	t8:21
LRRC7_1	LRRC7	AATTTAGTGCCAAGCCACAA	DSAMKL
LRRC7_2	LRRC7	ATAGGAGATTTAGGATTGCT	DSAMKL
LRRC7_3	LRRC7	GTGGCTTGGCACTAAATTAT	DSAMKL
LRRC75A-AS1_1	LRRC75A-AS1	GGTAGGCTCTCTAGGAATCT	GMP, t8:21
LRRC75A-AS1_2	LRRC75A-AS1	AAGCCTGTCTAGAGGGCGGA	GMP, t8:22
LRRC75A-AS1_3	LRRC75A-AS1	GTTATGGAGGTAGGCTCTCT	GMP, t8:23
MACROD2-AS1_1	MACROD2-AS1	AATGAAAGAACGGGGTATGT	HSC_SpotA
MACROD2-AS1_2	MACROD2-AS1	GCGAGGACGTGGATTCCCCA	HSC_SpotA
MACROD2-AS1_3	MACROD2-AS1	TGGGGAATCCACGTCCTCGC	HSC_SpotA
MAPT-AS1_1	MAPT-AS1	CCCACTGTGCACGCTCGCAA	AMKL
MAPT-AS1_2	MAPT-AS1	CCTTTGCGAGCGTGCACAGT	AMKL
MAPT-AS1_3	MAPT-AS1	CCGTGCCTGAGAACAGTGCG	AMKL
MAPT-IT1_1	MAPT-IT1	TTTACGGTGCCATGCCAAAC	HSC_SpotA
MAPT-IT1_2	MAPT-IT1	TGAAGCCCGGCCACCCGGTT	HSC_SpotA
MAPT-IT1_3	MAPT-IT1	TTCGGCGTGTCACGTCTTTA	HSC_SpotA
MID1IP1-AS1_1	MID1IP1-AS1	GGGTTTATTATTAGCCGTCG	GMP
MID1IP1-AS1_2	MID1IP1-AS1	CCACGCGGGGAGCGCGCGCA	GMP
MID1IP1-AS1_3	MID1IP1-AS1	GGCCGCGGCCACTCCAGATT	GMP
MKRNP2_1	MKRNP2	ATGCCTTGACCCCCAGCGAT	GMP
MKRNP2_2	MKRNP2	GACATCGTGGAGATCAATGC	GMP
MKRNP2_3	MKRNP2	ATTGATCTCCACGATGTCCA	GMP
MMP25-AS1_1	MMP25-AS1	GATGTAAGGGATATGGCTTG	AMKL
MMP25-AS1_2	MMP25-AS1	CTCAAGGGATGTAAGGGATA	AMKL
MMP25-AS1_3	MMP25-AS1	TGGAGGACTCAAGGGATGTA	AMKL
MRPL42P6_1	MRPL42P6	TCCAATCCAAATGTTTGGAC	HSC_SpotA
MRPL42P6_2	MRPL42P6	TGTCTGTCATAGTGTATCTT	HSC_SpotA
MRPL42P6_3	MRPL42P6	TCCAGTCCAAACATTTGGAT	HSC_SpotA
MTCO2P33_1	MTCO2P33	GGAAAATAATTATAAGAGCG	AMKL
MTCO2P33_2	MTCO2P33	ATAGGGGATATAGCGTTTGA	AMKL
MTCO2P33_3	MTCO2P33	TAATTATAAGAGCGTGGTCA	AMKL
MTCO2P5_1	MTCO2P5	TCTAATACCATCAAAACAAT	AMKL
MTCO2P5_2	MTCO2P5	TTCAATTTCTTGGGCATCTA	AMKL
MTCO2P5_3	MTCO2P5	CTGTTAAATACAGAATACAT	AMKL
MTCYBP24_1	MTCYBP24	AAGTGAGCCAAAGTTTCATC	GMP
MTCYBP24_2	MTCYBP24	GTAGAAATGCTGGAGGCTGT	GMP
MTCYBP24_3	MTCYBP24	GTTTCATCAGGTAGAAATGC	GMP
MTHFD2P2_1	MTHFD2P2	CATAACTGGCAAACTCAAGT	HSC_SpotB
MTHFD2P2_2	MTHFD2P2	GGTGTTGGTCCCATGACAGA	HSC_SpotB
MTHFD2P2_3	MTHFD2P2	AGAGGTCAAGGTCCCATAAC	HSC_SpotB
MTRF1LP2_1	MTRF1LP2	GTGCGATATAAAACTTGCCG	HSC_SpotA
MTRF1LP2_2	MTRF1LP2	CAGCTCAGGGTCCGTCCGCC	HSC_SpotA
MTRF1LP2_3	MTRF1LP2	TCTGGTCCCACAGGGGCCGT	HSC_SpotA
NDUFA5P12_1	NDUFA5P12	TATGCAATACTCCACACGAG	HSC_SpotB, t8:21
NDUFA5P12_2	NDUFA5P12	AAGGATTCTTGATGCTCTTG	HSC_SpotB, t8:21
NDUFA5P12_3	NDUFA5P12	AATATTCTTAGCCTCTCGTG	HSC_SpotB, t8:21
NDUFS6P1_1	NDUFS6P1	GGGGTATGGGCCTTGCCAAC	HSC_SpotA
NDUFS6P1_2	NDUFS6P1	GGCCCATACCCCAAAACACC	HSC_SpotA
NDUFS6P1_3	NDUFS6P1	CCCTCAGGTGCCAGGTGTTT	HSC_SpotA
NIPBL-AS1_1	NIPBL-AS1	TTAGTGTTTGGCGCCGGCGG	CMP
NIPBL-AS1_2	NIPBL-AS1	TAGTGTTTGGCGCCGGCGGA	CMP
NIPBL-AS1_3	NIPBL-AS1	GCCACTTGGGCTCGCGTCCT	CMP
NIPBL-AS1_4	NIPBL-AS1	TGGTTGTTAGTGTTTGGCGC	CMP
NIPBL-AS1_5	NIPBL-AS1	GCAGGAATGACTCCCTCCGC	CMP
NKX2-1-AS1_1	NKX2-1-AS1	TCATCGACATGATTCGGCGG	GMP
NKX2-1-AS1_2	NKX2-1-AS1	TTGGACTCATCGACATGATT	GMP
NKX2-1-AS1_3	NKX2-1-AS1	GAGAACGGAGTCGTGTGCTT	GMP
NOL8P1_1	NOL8P1	TTATGTGGATGGTCTTAGCC	HSC_SpotB
NOL8P1_2	NOL8P1	GGCTAAGACCATCCACATAA	HSC_SpotB
NOL8P1_3	NOL8P1	GCTAAGACCATCCACATAAA	HSC_SpotB
NPM1P14_1	NPM1P14	AGATAGGTCTGGGGCCTCAA	HSC_SpotA
NPM1P14_2	NPM1P14	CACAATTGAAAAGATAGGTC	HSC_SpotA
NPM1P14_3	NPM1P14	ACATGGATATGAGCCCCTTG	HSC_SpotA
OR1H1P_1	OR1H1P	GAAATTCATAGATGCAGGTC	HSC_SpotA
OR1H1P_2	OR1H1P	CATGTACTTGGTCACTGTGT	HSC_SpotA
OR1H1P_3	OR1H1P	CAGTGACCAAGTACATGACC	HSC_SpotA
OR2A1-AS1_1	OR2A1-AS1	CATGCCAAGTATTCCGGGAT	AMKL
OR2A1-AS1_2	OR2A1-AS1	ACAGGTTCACTTGAACCATC	AMKL
OR2A1-AS1_3	OR2A1-AS1	CATTCCCATCCCGGAATACT	AMKL
OR4C14P_1	OR4C14P	GTTGGGAAATCTATTCATTG	HSC_SpotA
OR4C14P_2	OR4C14P	CATGTATGTGACCACAGTGT	HSC_SpotA
OR4C14P_3	OR4C14P	CAACACTGTGGTCACATACA	HSC_SpotA
OR4C1P_1	OR4C1P	GGTGATGACAATGAACAGAT	AMKL
OR4C1P_2	OR4C1P	AATGAACAGATTGGCCAGCA	AMKL
OR4C1P_3	OR4C1P	AATTCAGTCACATTGTTGGG	AMKL
PA2G4P1_1	PA2G4P1	TAACCAGGTACTACGGTCCT	GMP
PA2G4P1_2	PA2G4P1	GGGGGGCGACATCGCTAACC	GMP
PA2G4P1_3	PA2G4P1	ACATCGCTAACCAGGTACTA	GMP
PAXIP1-AS2_1	PAXIP1-AS2	ACCAAAGACGCCCGTATGTC	CMP
PAXIP1-AS2_2	PAXIP1-AS2	TCTTTGGTAAGACCGCTCTC	CMP
PAXIP1-AS2_3	PAXIP1-AS2	ACTGACTTCACCAGACATAC	CMP
PCAT6_1	PCAT6	CTGCACAAATGAGGGCGGTT	HSPC, GMP
PCAT6_2	PCAT6	GAGACGTGGCACTCGGAGCG	HSPC, GMP
PCAT6_3	PCAT6	GCTCCGAGTGCCACGTCTCC	HSPC, GMP
PCAT6_4	PCAT6	CCTGGGCTGCAGCTCCGCTA	HSPC, GMP
PCAT6_5	PCAT6	TGGGTTCCGCTCCGGCCGCC	HSPC, GMP
PCMTD1P1_1	PCMTD1P1	AGCCCTTTGAGGAATACCCT	GMP
PCMTD1P1_2	PCMTD1P1	AGGCCAAGGGTATTCCTCAA	GMP
PCMTD1P1_3	PCMTD1P1	GACTTGGCTCATATTTACAT	GMP
PRELID3BP10_1	PRELID3BP10	TCCAACCACAGTTGGTTCAT	HSC_SpotB, t8:21
PRELID3BP10_2	PRELID3BP10	CAAACCCTATGAACCAACTG	HSC_SpotB, t8:21
PRELID3BP10_3	PRELID3BP10	CCCTATGAACCAACTGTGGT	HSC_SpotB, t8:21
PRPF38AP2_1	PRPF38AP2	TTTGTGGGTGGCCTCTATGG	t8:21
PRPF38AP2_2	PRPF38AP2	GCCATGGAGTTAAGGTTTGT	t8:21
PRPF38AP2_3	PRPF38AP2	ACTTGCAGTCGATAAAGCCA	t8:21
PRRT1_1	PRRT1	GCGATGCATTAGGAAGATCC	AMKL
PRRT1_2	PRRT1	CGCCTCAGCCATGAACAACG	AMKL
PRRT1_3	PRRT1	GGAGCGAGGCCTACGGACCC	AMKL
PRSS3P4_1	PRSS3P4	GATCTTGTCATCGTCGTCAA	HSC_SpotA, HSPC, CMP
PRSS3P4_2	PRSS3P4	GACGACGATGACAAGATCAT	HSC_SpotA, HSPC, CMP
PRSS3P4_3	PRSS3P4	GCTGGTTAGCACTTCTGTGG	HSC_SpotA, HSPC, CMP
PTGES3P4_1	PTGES3P4	AATGGGGCCAGTCATGGCCA	HSC_SpotB
PTGES3P4_2	PTGES3P4	TGCTTAAAATGATCACTTCC	HSC_SpotB
PTGES3P4_3	PTGES3P4	GCATAAGAGAATGGACAGAT	HSC_SpotB
PTP4A1P7_1	PTP4A1P7	GGAGCTGGGTGGTTCATTCG	HSC_SpotB
PTP4A1P7_2	PTP4A1P7	TATGTGACTTTCACAGGAGC	HSC_SpotB
PTP4A1P7_3	PTP4A1P7	ATAGAGGAGCTTAAGAAGTA	HSC_SpotB
RAB28P3_1	RAB28P3	TTGAGCGGGATAACATTGCC	HSC_SpotA
RAB28P3_2	RAB28P3	TGAATGTTACTCTTCAAGTA	HSC_SpotA
RAB28P3_3	RAB28P3	GTTTCTTGAGCAAAACTCAT	HSC_SpotA
RBAKDN_1	RBAKDN	ACGGACCAGTCACCGGTCTC	AMKL
RBAKDN_2	RBAKDN	ACTGGTCCGTGGGCTAACTC	AMKL
RBAKDN_3	RBAKDN	GGGAGACATAGGCGGGCCGT	AMKL
REG1CP_1	REG1CP	CAAGTGAACTCATATGCATG	GMP
REG1CP_2	REG1CP	TGGGGAAAACAATCTCACCT	GMP
REG1CP_3	REG1CP	ATATGCATGAGGATAGAGTG	GMP
RFESDP1_1	RFESDP1	AGAGGGAATATTCTTCTGTC	DSAMKL
RFESDP1_2	RFESDP1	GAATATTCTTCTGTCTGGGT	DSAMKL
RFESDP1_3	RFESDP1	CTGCACAAGATACTGAAAAG	DSAMKL
RNF216P1_1	RNF216P1	CTTTGGAGGAGTAAGCGGCG	GMP
RNF216P1_2	RNF216P1	GCGGGGCGCGCTCGAGCTTC	GMP
RNF216P1_3	RNF216P1	TCACTCGCCACTCAACTCGC	GMP
RP1-140K8.3_1	RP1-140K8.3	GTCTGAAGAGTTATCCTTTC	HSPC
RP1-140K8.3_2	RP1-140K8.3	AGCCTTGTCCCACTCCCCTT	HSPC
RP1-140K8.3_3	RP1-140K8.3	AGGATGGGCCCAAGGGGAGT	HSPC
RP1-163M9.7_1	RP1-163M9.7	GCCGGGAGCTCAACGATTCC	GMP
RP1-163M9.7_2	RP1-163M9.7	GGTCTAAGGTGGCGTGAAGA	GMP
RP1-163M9.7_3	RP1-163M9.7	CAGAGGGGGCCGGGCGGGTA	GMP
RP1-20B21.4_1	RP1-20B21.4	GGAGGTTGTGATTTGGTCGA	GMP
RP1-20B21.4_2	RP1-20B21.4	TGAAAGAGGCTTAGCGTGAA	GMP
RP1-20B21.4_3	RP1-20B21.4	AGCGTGAAGGGGAATCAAAG	GMP
RP1-293L6.1_1	RP1-293L6.1	GTTACATGTTCGCCGCTTCC	GMP
RP1-293L6.1_2	RP1-293L6.1	CGGCGAACATGTAACCTGGA	GMP
RP1-293L6.1_3	RP1-293L6.1	GTGTTTGTAATTACCCGTCC	GMP
RP1-303A1.1_1	RP1-303A1.1	TATCACCAGCTGATAACTAT	HSC_SpotA
RP1-303A1.1_2	RP1-303A1.1	GGTCCCCCATAGTTATCAGC	HSC_SpotA
RP1-303A1.1_3	RP1-303A1.1	CTAAGGGGAATTTGCATGGC	HSC_SpotA
RP1-52J10.9_1	RP1-52J10.9	CACTTGGAAGGGCACTTGCA	GMP
RP1-52J10.9_2	RP1-52J10.9	TGCACTGGGATGGACAGTTT	GMP
RP1-52J10.9_3	RP1-52J10.9	CATTTCAGAGTACACTTGGA	GMP
RP11-102C16.3_1	RP11-102C16.3	AAGCACGTGGACCGACACCC	HSC_SpotA
RP11-102C16.3_2	RP11-102C16.3	GCAGTGCCTCTAGTGGTTGC	HSC_SpotA
RP11-102C16.3_3	RP11-102C16.3	CTTGTGGCCGCAGTAGGGTC	HSC_SpotA
RP11-1070A24.1_1	RP11-1070A24.1	CAGAATTAGTGGCCTTCGCT	GMP
RP11-1070A24.1_2	RP11-1070A24.1	CTGAAGGGCACTCCCAGCGA	GMP
RP11-1070A24.1_3	RP11-1070A24.1	GATGAAAATGGCAGAATTAG	GMP
RP11-1079K10.1_1	RP11-1079K10.1	CAGTGTTACCAGCAAGCTGT	HSC_SpotA
RP11-1079K10.1_2	RP11-1079K10.1	CAGCAAGCTGTTGGCATTGT	HSC_SpotA
RP11-1079K10.1_3	RP11-1079K10.1	CAACAATGCCAACAGCTTGC	HSC_SpotA
RP11-109A6.3_1	RP11-109A6.3	TCATGGGACCCAAACAGCGG	HSC_SpotA
RP11-109A6.3_2	RP11-109A6.3	TGTTTGGGTCCCATGAACGA	HSC_SpotA
RP11-109A6.3_3	RP11-109A6.3	GGGAGGCTTCCATCGTTCAT	HSC_SpotA
RP11-117D22.1_1	RP11-117D22.1	AGGAGAAGCGGCGCATCCTG	AMKL
RP11-117D22.1_2	RP11-117D22.1	CAGAAGCTCTGCAGATCTGT	AMKL
RP11-117D22.1_3	RP11-117D22.1	GACAGCTGACTCTGGCTTCC	AMKL
RP11-121M22.1_1	RP11-121M22.1	GCCGTCGGGACTTGTACTGT	GMP
RP11-121M22.1_2	RP11-121M22.1	ACAAGTCCCGACGGCCAAGA	GMP
RP11-121M22.1_3	RP11-121M22.1	GACTCCGTCTCCTTAGACGG	GMP
RP11-122M14.3_1	RP11-122M14.3	TCCCACCAGGCTACGAGGTT	AMKL
RP11-122M14.3_2	RP11-122M14.3	TCCCAACCTCGTAGCCTGGT	AMKL
RP11-122M14.3_3	RP11-122M14.3	TTCTAGGGCACTGTCTAAAC	AMKL
RP11-123B3.2_1	RP11-123B3.2	CGCCTCACAACAGCTACCTT	GMP
RP11-123B3.2_2	RP11-123B3.2	CCACTGACCTTGGGCGACCT	GMP
RP11-123B3.2_3	RP11-123B3.2	GGGCGACCTTGGGTGACTTC	GMP
RP11-124D2.1_1	RP11-124D2.1	ACATTGGAGAAGATTCAAGC	t8:21
RP11-124D2.1_2	RP11-124D2.1	AAAATCATCCCATTCCTCAG	t8:21
RP11-124D2.1_3	RP11-124D2.1	ATCCAAATCCACTGAGGAAT	t8:21
RP11-12P19.2_1	RP11-12P19.2	ACACTGTTCTGGGCTATCTT	DSAMKL
RP11-12P19.2_2	RP11-12P19.2	TGTGTTCATTGTGGCGTTTG	DSAMKL
RP11-12P19.2_3	RP11-12P19.2	CACCAATGTAGTAGGATTAG	DSAMKL
RP11-146N23.1_1	RP11-146N23.1	AAAAGTTGCTGCTGACACAC	t8:21
RP11-146N23.1_2	RP11-146N23.1	CACACTGGGTGAAGAATGGA	t8:21
RP11-146N23.1_3	RP11-146N23.1	CTGACACACTGGGTGAAGAA	t8:21
RP11-159H20.3_1	RP11-159H20.3	TGAGTCCTCAATGGGAACCC	HSC_SpotA
RP11-159H20.3_2	RP11-159H20.3	CTGCACCAGGGTTCCCATTG	HSC_SpotA
RP11-159H20.3_3	RP11-159H20.3	GGGGTGGTGGCACTGTCAGC	HSC_SpotA
RP11-15I11.3_1	RP11-15I11.3	AAGGCTTCGGGGGCTACCAG	HSC_SpotA
RP11-15I11.3_2	RP11-15I11.3	GGGAGAAAAAAAGGCTTCGG	HSC_SpotA
RP11-15I11.3_3	RP11-15I11.3	AGAGCCTTTCTTGCTCTGAT	HSC_SpotA
RP11-172H24.4_1	RP11-172H24.4	GATGGCGCGCCCGGGGGTGA	HSPC
RP11-172H24.4_2	RP11-172H24.4	CCTGCCGGGTTGCTGCGCCG	HSPC
RP11-172H24.4_3	RP11-172H24.4	TCCCTCGCTGGCGGCGGAGC	HSPC
RP11-181C3.1_1	RP11-181C3.1	CTCCAGCCGCCATCTTGCGA	AMKL
RP11-181C3.1_2	RP11-181C3.1	CATCTTGCGAAGGCCTGCGC	AMKL
RP11-181C3.1_3	RP11-181C3.1	CGGCGCAGGCCTTCGCAAGA	AMKL
RP11-18B16.2_1	RP11-18B16.2	AATGGGATGGTCATGATGCC	GMP
RP11-18B16.2_2	RP11-18B16.2	TCTACAGATGAAAGCGGCTG	GMP
RP11-18B16.2_3	RP11-18B16.2	AGCCGCTTTCATCTGTAGAA	GMP
RP11-18H21.1_1	RP11-18H21.1	TGACTGAGGAGCTCGAGAGT	HSC_SpotA, AMKL
RP11-18H21.1_2	RP11-18H21.1	CTATGAAATGTGGTGTGTGC	HSC_SpotA, AMKL
RP11-18H21.1_3	RP11-18H21.1	GCACACACCACATTTCATAG	HSC_SpotA, AMKL
RP11-191F9.3_1	RP11-191F9.3	TATTTGAGGTCGTTCATTCA	AMKL
RP11-191F9.3_2	RP11-191F9.3	TCAAGAACCCAGGGCTTTGA	AMKL
RP11-191F9.3_3	RP11-191F9.3	AAGAAAAGCCTTCAAAGCCC	AMKL
RP11-1C1.5_1	RP11-1C1.5	ACATCCCTGCTCCAGCGATC	AMKL
RP11-1C1.5_2	RP11-1C1.5	TGACCCTCACCCCAGATCGC	AMKL
RP11-1C1.5_3	RP11-1C1.5	TAGAGCCATGTGGTTATGGT	AMKL
RP11-1E11.2_1	RP11-1E11.2	AAGATCTGAAGATCCAATCA	HSC_SpotA
RP11-1E11.2_2	RP11-1E11.2	ATCTGAAGATCCAATCAGGG	HSC_SpotA
RP11-1E11.2_3	RP11-1E11.2	TCCACTGAAACACTTTGTGC	HSC_SpotA
RP11-208P4.1_1	RP11-208P4.1	GTGATCCGAAGTTGTTGTTG	HSC_SpotA
RP11-208P4.1_2	RP11-208P4.1	AACGACCACAACAACAACTT	HSC_SpotA
RP11-208P4.1_3	RP11-208P4.1	GAGGCGGAGGTGTCAGTGAG	HSC_SpotA
RP11-20B24.4_1	RP11-20B24.4	TCAACGCGCTTTATTCCGAG	HSC_SpotA, AMKL
RP11-20B24.4_2	RP11-20B24.4	GGGAGTAAGGGGACGCCTTC	HSC_SpotA, AMKL
RP11-20B24.4_3	RP11-20B24.4	CAGCCCTGCATCCGCCCGGA	HSC_SpotA, AMKL
RP11-20I23.13_1	RP11-20I23.13	AGTAATTGGGTCCATAGCGT	AMKL
RP11-20I23.13_2	RP11-20I23.13	CAGGGACCGTGTCCTCTTAT	AMKL
RP11-20I23.13_3	RP11-20I23.13	GAGGTGACTTACCTACGCTA	AMKL
RP11-237D3.1_1	RP11-237D3.1	CAATTATGCATAGGTGTCTG	HSC_SpotA
RP11-237D3.1_2	RP11-237D3.1	CTCAGACACCTATGCATAAT	HSC_SpotA
RP11-237D3.1_3	RP11-237D3.1	TTTCTGCTCCAATTATGCAT	HSC_SpotA
RP11-245G13.1_1	RP11-245G13.1	GACATACGTCTGACTGGTGC	t8:21
RP11-245G13.1_2	RP11-245G13.1	CATAACAGGTGGAAACCCAG	t8:21
RP11-245G13.1_3	RP11-245G13.1	TCAAAATGAAGCATAACAGG	t8:21
RP11-247I13.6_1	RP11-247I13.6	AGGTAGCTTCATATATGGCT	GMP
RP11-247I13.6_2	RP11-247I13.6	ATATGGCTTGGGTAGCACCT	GMP
RP11-247I13.6_3	RP11-247I13.6	AGTGAGGATCTTTGATGCCT	GMP
RP11-271M24.2_1	RP11-271M24.2	ACTGACATAATCCGCACTTT	AMKL
RP11-271M24.2_2	RP11-271M24.2	GATGCTCAGAATCGCAGAAT	AMKL
RP11-271M24.2_3	RP11-271M24.2	GCGATTCTGAGCATCAATTT	AMKL
RP11-280O24.3_1	RP11-280O24.3	TAGGCCTTTTCTCAAACAGG	GMP
RP11-280O24.3_2	RP11-280O24.3	TAAGAATTTTGGCATTAGAC	GMP
RP11-280O24.3_3	RP11-280O24.3	CAGGGGGTTGACCACTTTCT	GMP
RP11-286M16.1_1	RP11-286M16.1	GGGTCTCATGCATGAGGAAT	AMKL
RP11-286M16.1_2	RP11-286M16.1	TTCTTATGGAATCTGCTCTC	AMKL
RP11-286M16.1_3	RP11-286M16.1	AGCACACTGAAGTGGAAGAT	AMKL
RP11-294O2.1_1	RP11-294O2.1	ACTGCAGCCCGGTTACTGCT	HSC_SpotA
RP11-294O2.1_2	RP11-294O2.1	GTGGGATGAACAAACGTCAT	HSC_SpotA
RP11-294O2.1_3	RP11-294O2.1	GTCATTGCCTAGCAGTAACC	HSC_SpotA
RP11-296O14.1_1	RP11-296O14.1	TCAATCCATGCCTAACCGAA	GMP
RP11-296O14.1_2	RP11-296O14.1	ACTTCATTATCCTTTCGGTT	GMP
RP11-296O14.1_3	RP11-296O14.1	GTTCAGGTTGTACGAGTACG	GMP
RP11-296O14.3_1	RP11-296O14.3	TGGGGGTCCACTCTACACCC	AMKL
RP11-296O14.3_2	RP11-296O14.3	GAGGCAACCAGGGTGTAGAG	AMKL
RP11-296O14.3_3	RP11-296O14.3	AGGAAAAACTGAGGCAACCA	AMKL
RP11-299J3.6_1	RP11-299J3.6	ACGACTGGAATCTGATGACC	t8:21
RP11-299J3.6_2	RP11-299J3.6	AAATTATAGGATGTGAGATC	t8:21
RP11-299J3.6_3	RP11-299J3.6	AATGTTTGAAAACACTAAAG	t8:21
RP11-317P15.3_1	RP11-317P15.3	CCGGTCTGATGCCAAACAAC	AMKL
RP11-317P15.3_2	RP11-317P15.3	TCATGGTGACGACCAGGTAA	AMKL
RP11-317P15.3_3	RP11-317P15.3	ATTTCACCTACCCAGTTGTT	AMKL
RP11-319F12.2_1	RP11-319F12.2	ATTATTCTTAATCTTCTAAG	HSC_SpotA
RP11-319F12.2_2	RP11-319F12.2	CTTAGAAGATTAAGAATAAT	HSC_SpotA
RP11-319F12.2_3	RP11-319F12.2	ATACACTTCTTTGTTTTGAA	HSC_SpotA
RP11-31E13.2_1	RP11-31E13.2	ACCTCATCCCTGACCAGTGC	HSC_SpotA
RP11-31E13.2_2	RP11-31E13.2	GTGCAGGGGAAGTGTGCTAT	HSC_SpotA
RP11-31E13.2_3	RP11-31E13.2	GGCTGTTTCCTGCACTGGTC	HSC_SpotA
RP11-331F4.4_1	RP11-331F4.4	GGAGGCCGCCCAAGTCCAGA	GMP
RP11-331F4.4_2	RP11-331F4.4	GCCCGGGGGCACATAAACCC	GMP
RP11-331F4.4_3	RP11-331F4.4	TCCTGGGTTTATGTGCCCCC	GMP
RP11-331F4.4_4	RP11-331F4.4	CTATCCTCCCAGTACAAAGC	GMP
RP11-331F4.4_5	RP11-331F4.4	CAGAAGGGACCCGAGGGGCG	GMP
RP11-331F4.4_6	RP11-331F4.4	CGGGTCCCTTCTGCCCTTGT	GMP
RP11-334A14.8_1	RP11-334A14.8	ACCCTGGTGGGTTGAGCTCT	GMP
RP11-334A14.8_2	RP11-334A14.8	TTGAGCTCTGGGCTGCCCGC	GMP
RP11-334A14.8_3	RP11-334A14.8	CACGGAGTCCATGATCACCC	GMP
RP11-342F17.1_1	RP11-342F17.1	GATTCGTATCTTTGTGCTTC	HSC_SpotB
RP11-342F17.1_2	RP11-342F17.1	CACACAACCAGTCCCAAAAA	HSC_SpotB
RP11-342F17.1_3	RP11-342F17.1	TGGCAAACTGCATGTTCCTC	HSC_SpotB
RP11-344N17.13_1	RP11-344N17.13	AAACCAAAGATCGTGATGCC	t8:21
RP11-344N17.13_2	RP11-344N17.13	CATCAGGTTTGTGCCTCCAC	t8:21
RP11-344N17.13_3	RP11-344N17.13	GAGTCTTTGAATCACCTTCC	t8:21
RP11-346K17.3_1	RP11-346K17.3	CAAAGTATTCTGAGGCCCGT	t8:21
RP11-346K17.3_2	RP11-346K17.3	ACAATCTTTACTATCTCCGA	t8:21
RP11-346K17.3_3	RP11-346K17.3	TGTTGAGCTGTACACTCCGT	t8:21
RP11-348H3.4_1	RP11-348H3.4	GCTGTACTGATGACCTCAAC	HSC_SpotA
RP11-348H3.4_2	RP11-348H3.4	CGAAACCAAACTGGTGAGAT	HSC_SpotA
RP11-348H3.4_3	RP11-348H3.4	TCGGTCCATGATGCCAGTTG	HSC_SpotA
RP11-354E11.2_1	RP11-354E11.2	CTTGCAACTGACGGCCAAGC	DSAMKL
RP11-354E11.2_2	RP11-354E11.2	CTGCCTGCTGACCGTGGTCT	DSAMKL
RP11-354E11.2_3	RP11-354E11.2	CAGCTTGGCCGTCAGTTGCA	DSAMKL
RP11-359G22.2_1	RP11-359G22.2	GCCCACTTGTCTCCTGTTCG	CMP
RP11-359G22.2_2	RP11-359G22.2	CCCCCGAACAGGAGACAAGT	CMP
RP11-359G22.2_3	RP11-359G22.2	GGTTTTATCTCTCCACATGC	CMP
RP11-360F5.3_1	RP11-360F5.3	TAGAATATGAGGCCTCCGAG	HSC_SpotA
RP11-360F5.3_2	RP11-360F5.3	CTTCCGTCACCTAGAATATG	HSC_SpotA
RP11-360F5.3_3	RP11-360F5.3	ACATTTCCAACCTGTGCATG	HSC_SpotA
RP11-361D14.2_1	RP11-361D14.2	ATCAGTCACAGTAGCGACTC	HSC_SpotA
RP11-361D14.2_2	RP11-361D14.2	TCTTAACTCCAGTGTCCATA	HSC_SpotA
RP11-361D14.2_3	RP11-361D14.2	AGAGACAGCCATATGGACAC	HSC_SpotA
RP11-365D23.2_1	RP11-365D23.2	CTCTCGAAGTTTCCAACTGA	GMP
RP11-365D23.2_2	RP11-365D23.2	CTTCGAGTTCTTCCATCAGT	GMP
RP11-365D23.2_3	RP11-365D23.2	ATGGCAGTCACCACAGGATC	GMP
RP11-383G10.3_1	RP11-383G10.3	GAATACTCATGACACTTCTC	GMP, t8:21
RP11-383G10.3_2	RP11-383G10.3	ATGATTTTGTGGGGTTCTCT	GMP, t8:21
RP11-383G10.3_3	RP11-383G10.3	GACACTTCTCAGGCCATCAA	GMP, t8:21
RP11-401P9.5_1	RP11-401P9.5	CCTTGAACTTTGCATAACAG	GMP
RP11-401P9.5_2	RP11-401P9.5	GGCCTCTCTCACACTTAGCT	GMP
RP11-401P9.5_3	RP11-401P9.5	CCCCCAGCTAAGTGTGAGAG	GMP
RP11-411H5.1_1	RP11-411H5.1	AGACACAGTGTTCCATCCAG	HSPC
RP11-411H5.1_2	RP11-411H5.1	ATCCAGAGGATGTAGCATCA	HSPC
RP11-411H5.1_3	RP11-411H5.1	TTCTCATGGATGACGGTGAA	HSPC
RP11-411H5.1_4	RP11-411H5.1	AAATCTTAGGATATTGTCTT	HSPC
RP11-411H5.1_5	RP11-411H5.1	TGGAACACTGTGTCTTCTCA	HSPC
RP11-428K3.1_1	RP11-428K3.1	AGAAACTAGTTCCTCGCTCG	AMKL
RP11-428K3.1_2	RP11-428K3.1	TTCCATTGCAGTATCGGATT	AMKL
RP11-428K3.1_3	RP11-428K3.1	AGAAACGCGAGCCACGAGCG	AMKL
RP11-428P16.2_1	RP11-428P16.2	TTATGTAGGCCATTGCCAGT	AMKL
RP11-428P16.2_2	RP11-428P16.2	CTGGCAATGGCCTACATAAT	AMKL
RP11-428P16.2_3	RP11-428P16.2	AAAGACGGCTACAACCCCAC	AMKL
RP11-430K21.2_1	RP11-430K21.2	CTGCTTGCCCCAAGCTAGCG	CMP
RP11-430K21.2_2	RP11-430K21.2	CTGTTCCTGCTACTCGGGTG	CMP
RP11-430K21.2_3	RP11-430K21.2	TGGAACGGCTTTATTTCCAC	CMP
RP11-432M8.16_1	RP11-432M8.16	AAGTTCCCATCTAGGCCCTC	HSC_SpotA
RP11-432M8.16_2	RP11-432M8.16	AACAAGGATGGAATCCCTGA	HSC_SpotA
RP11-432M8.16_3	RP11-432M8.16	TGTTGCTGCCCTTCAGAACT	HSC_SpotA
RP11-436J20.1_1	RP11-436J20.1	GGTGGTAGCTGGCACCTTAT	GMP
RP11-436J20.1_2	RP11-436J20.1	GTGCCAGCTACCACCAATGC	GMP
RP11-436J20.1_3	RP11-436J20.1	GGACACACTGCTGGCCAATA	GMP
RP11-445J14.1_1	RP11-445J14.1	CTCCACTTCTTTTCCGAGTA	CMP
RP11-445J14.1_2	RP11-445J14.1	CTCCATACTCGGAAAAGAAG	CMP
RP11-445J14.1_3	RP11-445J14.1	CCTGGCAAAGCAATTGTGCT	CMP
RP11-448K10.1_1	RP11-448K10.1	CAATTGCACAGTAGGTATCT	GMP
RP11-448K10.1_2	RP11-448K10.1	CTAAGAGACAATTGCACAGT	GMP
RP11-448K10.1_3	RP11-448K10.1	CTACTGTGCAATTGTCTCTT	GMP
RP11-449J3.3_1	RP11-449J3.3	AGCTGCCGGCTGACATTCAG	HSC_SpotA
RP11-449J3.3_2	RP11-449J3.3	TGCAAAAGAGTGTCAAGAAC	HSC_SpotA
RP11-449J3.3_3	RP11-449J3.3	TTCAGCCTCTGAATGTCAGC	HSC_SpotA
RP11-452J6.2_1	RP11-452J6.2	CGACGAGATTCACCATCACG	GMP
RP11-452J6.2_2	RP11-452J6.2	TCTGTCGTTGTAATTGGTCC	GMP
RP11-452J6.2_3	RP11-452J6.2	AAGACTGGGCTGTCTAGTCC	GMP
RP11-45P15.2_1	RP11-45P15.2	CAAAGAGGTTCAAATCTTCG	HSPC
RP11-45P15.2_2	RP11-45P15.2	TCAAATCTTCGTGGTCACCT	HSPC
RP11-45P15.2_3	RP11-45P15.2	GCAGTTTCACAAGTGTTCCA	HSPC
RP11-464F9.21_1	RP11-464F9.21	GTCCTCACTGTGCAGCGGTA	GMP
RP11-464F9.21_2	RP11-464F9.21	TCAGATTCGAAGACGGAGCC	GMP
RP11-464F9.21_3	RP11-464F9.21	AGCTCTATGTCTCACTGGCC	GMP
RP11-464F9.21_4	RP11-464F9.21	GATTTCCTGAGGCATCGATG	GMP
RP11-464F9.21_5	RP11-464F9.21	GGCAATGGGAGCCCTGGATT	GMP
RP11-470C13.4_1	RP11-470C13.4	TCGTCCTCCTGCGGCAGGCG	HSC_SpotA
RP11-470C13.4_2	RP11-470C13.4	CAAGGGCATACTTTCTACCC	HSC_SpotA
RP11-470C13.4_3	RP11-470C13.4	AGTATGCCCTTGTGGACCCC	HSC_SpotA
RP11-478C6.1_1	RP11-478C6.1	GACGGCAGCCGGGTCCGGGT	CMP
RP11-478C6.1_2	RP11-478C6.1	GGGCCACCGGGGATCTCGGC	CMP
RP11-478C6.1_3	RP11-478C6.1	CACCCGGACCCGGCTGCCGT	CMP
RP11-479J7.1_1	RP11-479J7.1	TGCATAAATTGCTTAGTAAG	HSC_SpotA
RP11-479J7.1_2	RP11-479J7.1	GAGATTAAACAACTTTTCAG	HSC_SpotA
RP11-479J7.1_3	RP11-479J7.1	TTGTTTAATCTCTCTGTGCC	HSC_SpotA
RP11-483F11.7_1	RP11-483F11.7	CCCTTGGGCTTAATCTAGAT	HSC_SpotA
RP11-483F11.7_2	RP11-483F11.7	TGGACCAAACATACCTGTTA	HSC_SpotA
RP11-483F11.7_3	RP11-483F11.7	CCCATCTAGATTAAGCCCAA	HSC_SpotA
RP11-501C14.5_1	RP11-501C14.5	CGGTCCGAAACCCCTCCGAG	HSC_SpotA
RP11-501C14.5_2	RP11-501C14.5	TGGTGTGTCACGTTTCTCCG	HSC_SpotA
RP11-501C14.5_3	RP11-501C14.5	CGGAGGGGTTTCGGACCGAA	HSC_SpotA
RP11-51L5.1_1	RP11-51L5.1	GGAAGCAGAGTGGCTATGAT	GMP
RP11-51L5.1_2	RP11-51L5.1	TGAACATTCATAAAAGCCAC	GMP
RP11-51L5.1_3	RP11-51L5.1	ACTTCCTACAGAAAGTCCAG	GMP
RP11-523L1.2_1	RP11-523L1.2	GACTTTAGAATGATAATCCG	HSC_SpotA
RP11-523L1.2_2	RP11-523L1.2	AACTTGATCCTTTGGGCAAC	HSC_SpotA
RP11-523L1.2_3	RP11-523L1.2	GAAAATTGAACTTGATCCTT	HSC_SpotA
RP11-526F3.1_1	RP11-526F3.1	GAGGACAGCTACTTACCGCT	HSC_SpotA
RP11-526F3.1_2	RP11-526F3.1	GTTGTTTCTGTGCAGCGGAG	HSC_SpotA
RP11-526F3.1_3	RP11-526F3.1	CTGGAAGATACATCAACACT	HSC_SpotA
RP11-52L5.6_1	RP11-52L5.6	GGCACAGTCGAATCCACGCC	t8:21
RP11-52L5.6_2	RP11-52L5.6	GCGCCGGGTGCCCCGGCCTA	t8:21
RP11-52L5.6_3	RP11-52L5.6	CGGCCTTAGGCCGGGGCACC	t8:21
RP11-534L6.3_1	RP11-534L6.3	GCTTCACCACAACGGCCGCC	GMP
RP11-534L6.3_2	RP11-534L6.3	TGGAGACCGAGGCTACCTCC	GMP
RP11-534L6.3_3	RP11-534L6.3	GTAGCCTCGGTCTCCAGCAC	GMP
RP11-545I10.2_1	RP11-545I10.2	GAAAAACTTACCCGTGCAGC	HSC_SpotA
RP11-545I10.2_2	RP11-545I10.2	GACTGTCCATGAACTTGAGC	HSC_SpotA
RP11-545I10.2_3	RP11-545I10.2	GAACTTGAGCAGGTCTAGAC	HSC_SpotA
RP11-552J9.12_1	RP11-552J9.12	AAATGTAAGCAGAGGTTGCG	t8:21
RP11-552J9.12_2	RP11-552J9.12	AGGTTTGCTATACTTAGTCG	t8:21
RP11-552J9.12_3	RP11-552J9.12	AAGCAGAGGTTGCGGGGCCT	t8:21
RP11-552M14.1_1	RP11-552M14.1	GGAGCAAGTCATATCTAACG	AMKL
RP11-552M14.1_2	RP11-552M14.1	GCAAAAAAAGAGTTTTGTGC	AMKL
RP11-552M14.1_3	RP11-552M14.1	CAAGTCATATCTAACGTGGA	AMKL
RP11-560A15.6_1	RP11-560A15.6	GTCCCTCAGGTTCTGTGCGC	GMP
RP11-560A15.6_2	RP11-560A15.6	CTCCTGCGCACAGAACCTGA	GMP
RP11-560A15.6_3	RP11-560A15.6	GGAAGACAGGTACGAACTAC	GMP
RP11-561O4.1_1	RP11-561O4.1	AGGCCTAGTAAAAGTAACCC	HSC_SpotA
RP11-561O4.1_2	RP11-561O4.1	ACAGAAAGTGTGACGTCTCC	HSC_SpotA
RP11-561O4.1_3	RP11-561O4.1	TGGTTTCACCCAAATATCAC	HSC_SpotA
RP11-567B20.1_1	RP11-567B20.1	GTCAGGCAAAGAAGCACCCG	t8:21
RP11-567B20.1_2	RP11-567B20.1	CATCTGGCATTGTTCAATCC	t8:21
RP11-567B20.1_3	RP11-567B20.1	TGGAGGTACTGGAGCAACAC	t8:21
RP11-573D15.8_1	RP11-573D15.8	GCAGCTGCATTATCTAAGCG	GMP
RP11-573D15.8_2	RP11-573D15.8	AGCGGGGGAACATGTTAAAC	GMP
RP11-573D15.8_3	RP11-573D15.8	GGCAGCTGCATTATCTAAGC	GMP
RP11-57C19.2_1	RP11-57C19.2	CCGGATCTGCTGACGGAAGT	GMP
RP11-57C19.2_2	RP11-57C19.2	TGCTGACGGAAGTTGGCATT	GMP
RP11-57C19.2_3	RP11-57C19.2	GTATGCTCACACCTCAGAAG	GMP
RP11-57H12.3_1	RP11-57H12.3	GTAAGCTGGGCGGTCGCCTT	HSC_SpotA
RP11-57H12.3_2	RP11-57H12.3	CGAAGCTCAGCCTCTCGGTT	HSC_SpotA
RP11-57H12.3_3	RP11-57H12.3	AGAAGAGCCGGGGGTAAGCT	HSC_SpotA
RP11-5P4.3_1	RP11-5P4.3	CGAAAACTTTGGGCACAAGC	AMKL
RP11-5P4.3_2	RP11-5P4.3	GAGTTTACTTACAGATTAGC	AMKL
RP11-5P4.3_3	RP11-5P4.3	GGCTGGAGGATCGAAAACTT	AMKL
RP11-612J15.1_1	RP11-612J15.1	TAGAACAGTCACTAGCCTAG	HSC_SpotA
RP11-612J15.1_2	RP11-612J15.1	TATCTGGACACAACTATGTG	HSC_SpotA
RP11-612J15.1_3	RP11-612J15.1	TTTAGAACAGTCACTAGCCT	HSC_SpotA
RP11-61F5.1_1	RP11-61F5.1	TATAATTCACCAGCATGCCG	GMP
RP11-61F5.1_2	RP11-61F5.1	CTGGAGGGAGGCACCATAGT	GMP
RP11-61F5.1_3	RP11-61F5.1	AATAAATATGGGACCCACTA	GMP
RP11-644L4.1_1	RP11-644L4.1	TGGTAACTTCCCGAGTCTCT	HSC_SpotA
RP11-644L4.1_2	RP11-644L4.1	ACGGTATCCATGGCAACTGA	HSC_SpotA
RP11-644L4.1_3	RP11-644L4.1	CAGATTGGAGCCGAGAGACT	HSC_SpotA
RP11-649E7.5_1	RP11-649E7.5	AGAATGCCTTCACTGAATTT	HSPC
RP11-649E7.5_2	RP11-649E7.5	TTTATACCAAAATTCAGTGA	HSPC
RP11-649E7.5_3	RP11-649E7.5	AACAAAACTTATTCTGCAAA	HSPC
RP11-65D24.2_1	RP11-65D24.2	ATGGTGTCCCGCAAATTCAC	HSPC
RP11-65D24.2_2	RP11-65D24.2	GACATCAACCAGGTGATCAC	HSPC
RP11-65D24.2_3	RP11-65D24.2	ATTCAGCCCAGAGCACTGAC	HSPC
RP11-662B19.1_1	RP11-662B19.1	CTTTGTGTAAGAAGCATGGT	GMP
RP11-662B19.1_2	RP11-662B19.1	GCCAAGGGAAAGTGGCTTAA	GMP
RP11-662B19.1_3	RP11-662B19.1	CTTGTACCATGTCACTCTGT	GMP
RP11-665C14.2_1	RP11-665C14.2	TAGCTGCCATGTTGGATCAC	CMP
RP11-665C14.2_2	RP11-665C14.2	CATTTGAATATAATGGTGTC	CMP
RP11-665C14.2_3	RP11-665C14.2	CTCCTAGCTGAGCGCCCAGC	CMP
RP11-665C16.1_1	RP11-665C16.1	GATGATTGTATGTCATACAC	GMP
RP11-665C16.1_2	RP11-665C16.1	GTTTACCAACCAAGAAGGTT	GMP
RP11-665C16.1_3	RP11-665C16.1	GGACACCCTATTTCTGTTGA	GMP
RP11-690D19.1_1	RP11-690D19.1	AGGCCTACAGAACATATATA	HSC_SpotB
RP11-690D19.1_2	RP11-690D19.1	GCACCCTATATATGTTCTGT	HSC_SpotB
RP11-690D19.1_3	RP11-690D19.1	AAAACATGGAGTTGTTCCTG	HSC_SpotB
RP11-69C13.1_1	RP11-69C13.1	AAGATTGCTTTGGCTACTTC	HSC_SpotA
RP11-69C13.1_2	RP11-69C13.1	AATTCACATGGACTCACAAA	HSC_SpotA
RP11-69C13.1_3	RP11-69C13.1	ATAAATTACTTTGAGCACTG	HSC_SpotA
RP11-700P18.2_1	RP11-700P18.2	TTAAAGTAGTCCCGTTCCCG	HSC_SpotA
RP11-700P18.2_2	RP11-700P18.2	CAGCGAAGACCCTCGGGAAC	HSC_SpotA
RP11-700P18.2_3	RP11-700P18.2	TATTTGACAGCGAAGACCCT	HSC_SpotA
RP11-707O23.1_1	RP11-707O23.1	CCGCTATGTAATTCTTTCCA	CMP
RP11-707O23.1_2	RP11-707O23.1	ATGGTAGAGTTGCACTAAAG	CMP
RP11-707O23.1_3	RP11-707O23.1	GTGCAACTCTACCATTTGAA	CMP
RP11-723O4.9_1	RP11-723O4.9	CATGGGTGGCAAAATCGTCC	HSC_SpotA
RP11-723O4.9_2	RP11-723O4.9	GCGGTTACACATGCCAACAT	HSC_SpotA
RP11-723O4.9_3	RP11-723O4.9	GAGGGGCGCTGGCTGTAAAA	HSC_SpotA
RP11-734K21.3_1	RP11-734K21.3	CATATGTTTAATAGCTGGTG	HSC_SpotA
RP11-734K21.3_2	RP11-734K21.3	CTCACCAGCTATTAAACATA	HSC_SpotA
RP11-734K21.3_3	RP11-734K21.3	ATTTCCATATGTTTAATAGC	HSC_SpotA
RP11-74C13.3_1	RP11-74C13.3	CGTTCCAACACCTCTACCTT	AMKL
RP11-74C13.3_2	RP11-74C13.3	AGAGGTGTTGGAACGGGAGC	AMKL
RP11-74C13.3_3	RP11-74C13.3	TCTATCAGCCCTCCTTTCAC	AMKL
RP11-77P16.4_1	RP11-77P16.4	CCACCCGTCTGGGGCCCAAA	CMP
RP11-77P16.4_2	RP11-77P16.4	ACCGTTACATCTCCGTTGTC	CMP
RP11-77P16.4_3	RP11-77P16.4	ACTTATTAAGTGCCTGACAA	CMP
RP11-77P16.4_4	RP11-77P16.4	AGGTAAAGCTCCCTCCTTTT	CMP
RP11-77P16.4_5	RP11-77P16.4	CCGTCTGGGGCCCAAAAGGA	CMP
RP11-810P12.1_1	RP11-810P12.1	GCATGAGAGCTCCAAGGCTA	GMP
RP11-810P12.1_2	RP11-810P12.1	TTCTGCAGAGGCTTCGGCAC	GMP
RP11-810P12.1_3	RP11-810P12.1	AGGCTTCGGCACTGGCATCT	GMP
RP11-84H6.1_1	RP11-84H6.1	GTTGACATTGGCGATTTCAC	GMP
RP11-84H6.1_2	RP11-84H6.1	CTGCTGACGTGAGTTGACAT	GMP
RP11-84H6.1_3	RP11-84H6.1	GCCGCAGCAGAGGATGCTAG	GMP
RP11-85B7.2_1	RP11-85B7.2	CTCTGTGGAGCCGTAGTTGC	HSC_SpotA
RP11-85B7.2_2	RP11-85B7.2	CTCACAGGAAGGGAACGGCC	HSC_SpotA
RP11-85B7.2_3	RP11-85B7.2	AGTTGCTGGCTTGAGAATCC	HSC_SpotA
RP11-864N7.1_1	RP11-864N7.1	TAAGGATCCACTGTATGTCC	HSPC
RP11-864N7.1_2	RP11-864N7.1	CTTCTTACGGAAAGTCTGGC	HSPC
RP11-864N7.1_3	RP11-864N7.1	GACGCAGTACAAGAAGGGTA	HSPC
RP11-875O11.2_1	RP11-875O11.2	ACCACAGGGGAGTTCTTCGC	HSC_SpotA
RP11-875O11.2_2	RP11-875O11.2	GATCTGCAATGAGCGCCTTT	HSC_SpotA
RP11-875O11.2_3	RP11-875O11.2	GATCGCTTTGAACCTGCGGC	HSC_SpotA
RP11-89H19.1_1	RP11-89H19.1	CAGGGAAGTTGCGGCTGATG	AMKL
RP11-89H19.1_2	RP11-89H19.1	CCTCACAGAAGAGCACCCCT	AMKL
RP11-89H19.1_3	RP11-89H19.1	ATGAGGAAACACCTACCTGA	AMKL
RP11-983C2.2_1	RP11-983C2.2	ATTCTCTTGCATTCCACCCG	HSC_SpotA
RP11-983C2.2_2	RP11-983C2.2	GTGCTGCCAGAACGACCAGC	HSC_SpotA
RP11-983C2.2_3	RP11-983C2.2	GTGCTGTCTTGTTCCCCGGG	HSC_SpotA
RP13-463N16.6_1	RP13-463N16.6	GAAGATACCACCCCTCTTAG	HSC_SpotA
RP13-463N16.6_2	RP13-463N16.6	CTGACAGATCCATCATATCC	HSC_SpotA
RP13-463N16.6_3	RP13-463N16.6	TCCATCATATCCCGGCAAAA	HSC_SpotA
RP13-516M14.4_1	RP13-516M14.4	TCCAACCGCACGCCGATCGC	HSC_SpotA
RP13-516M14.4_2	RP13-516M14.4	TCTCCTAAAGGACGCCCGGG	HSC_SpotA
RP13-516M14.4_3	RP13-516M14.4	ATTCGCAGCCGACGTTGCGG	HSC_SpotA
RP3-331H24.4_1	RP3-331H24.4	ACATTAAGGAATAGGGTGAT	GMP
RP3-331H24.4_2	RP3-331H24.4	TTAATTCAAATTAGGTAAAC	GMP
RP3-331H24.4_3	RP3-331H24.4	CATTACAACATTAAGGAATA	GMP
RP3-341D10.1_1	RP3-341D10.1	GTGACCCTCTTCCGCCCTTT	t8:21
RP3-341D10.1_2	RP3-341D10.1	GAGGTCCAAAAGGGCGGAAG	t8:21
RP3-341D10.1_3	RP3-341D10.1	AGGTCCAAAAGGGCGGAAGA	t8:21
RP3-406A7.3_1	RP3-406A7.3	CCGAGCCTTATGCAGAATGC	GMP
RP3-406A7.3_2	RP3-406A7.3	GCTCGCCTGCATTCTGCATA	GMP
RP3-406A7.3_3	RP3-406A7.3	TCGGCCCTCATTCTGCATGA	GMP
RP3-425P12.5_1	RP3-425P12.5	CTGATCCAGTGTAATCGCGA	HSC_SpotA
RP3-425P12.5_2	RP3-425P12.5	TGTTACCTTCGCGATTACAC	HSC_SpotA
RP3-425P12.5_3	RP3-425P12.5	CACGGTTGAGCTGGCGCCTC	HSC_SpotA
RP3-525L6.2_1	RP3-525L6.2	CATGAGGATGGCCTAGCACG	GMP
RP3-525L6.2_2	RP3-525L6.2	GCACGTGGAATTCACAAAGC	GMP
RP3-525L6.2_3	RP3-525L6.2	AATACTGCTTTACATGAGGA	GMP
RP4-549F15.1_1	RP4-549F15.1	GTGGACACTGCGGGATGGCC	HSC_SpotA
RP4-549F15.1_2	RP4-549F15.1	CCGCAGTGTCCACTGGTGCA	HSC_SpotA
RP4-549F15.1_3	RP4-549F15.1	GATACTGTTCTTTATCCCCC	HSC_SpotA
RP4-580N22.2_1	RP4-580N22.2	AAGCTCTTGAGTGGGACGAT	GMP
RP4-580N22.2_2	RP4-580N22.2	GAAGAGGCTTGACCATAATT	GMP
RP4-580N22.2_3	RP4-580N22.2	GCCCGAGCATAGCTTCTTTT	GMP
RP4-591C20.9_1	RP4-591C20.9	CTTCAACTTGCGGAGTGACC	GMP
RP4-591C20.9_2	RP4-591C20.9	CATCCTGTTCCAGAGTATCC	GMP
RP4-591C20.9_3	RP4-591C20.9	GAAGCGCAACCAGGATACTC	GMP
RP4-604A21.1_1	RP4-604A21.1	GTCCTGGCTGGACGCTACTC	GMP
RP4-604A21.1_2	RP4-604A21.1	ATCCAGAGTAGCGTCCAGCC	GMP
RP4-604A21.1_3	RP4-604A21.1	TTGCCCCTACAGCCATGCTC	GMP
RP4-625H18.2_1	RP4-625H18.2	CCTTTCTGAAGCGCGCTTGC	AMKL
RP4-625H18.2_2	RP4-625H18.2	AAGCGCGCTTCAGAAAGGAC	AMKL
RP4-625H18.2_3	RP4-625H18.2	CCCTAGAAAACTACAGCGAG	AMKL
RP4-635A23.6_1	RP4-635A23.6	ACATCAATGGCCTCCTGAGC	DSAMKL
RP4-635A23.6_2	RP4-635A23.6	TGGCCTCCTGAGCTGGGAAT	DSAMKL
RP4-635A23.6_3	RP4-635A23.6	TTTATATAGCATTCAGGAAT	DSAMKL
RP4-726N1.2_1	RP4-726N1.2	TAGCAAATCCCGTTTGTTGG	AMKL
RP4-726N1.2_2	RP4-726N1.2	AATACATCTGCAGAGTCTCC	AMKL
RP4-726N1.2_3	RP4-726N1.2	AACGGGATTTGCTAGAAAGA	AMKL
RP4-800J21.3_1	RP4-800J21.3	AGAAGGGGTCTAGATCCTCG	DSAMKL
RP4-800J21.3_2	RP4-800J21.3	CTAGATCCTCGAGGGGGGGA	DSAMKL
RP4-800J21.3_3	RP4-800J21.3	CAGTTGCCAGCTGTCCTCGC	DSAMKL
RP4-800M22.2_1	RP4-800M22.2	AGGATCTCGTAGTCCTTCAA	HSC_SpotB
RP4-800M22.2_2	RP4-800M22.2	GAGTGTTTGAAAACCCTTGA	HSC_SpotB
RP4-800M22.2_3	RP4-800M22.2	ACACAAGCAGGAGTTCCTGT	HSC_SpotB
RP5-1042K10.12_1	RP5-1042K10.12	GCTGAAACCTGACTACCTAG	HSPC, GMP
RP5-1042K10.12_2	RP5-1042K10.12	ACCTAGAGGCTACTCTGGAC	HSPC, GMP
RP5-1042K10.12_3	RP5-1042K10.12	AGAGTAGCCTCTAGGTAGTC	HSPC, GMP
RP5-1120P11.4_1	RP5-1120P11.4	TGGCAAGGTGCATGCTCCTT	t8:21
RP5-1120P11.4_2	RP5-1120P11.4	GGGTGGACCTCAAGTTCCTA	t8:21
RP5-1120P11.4_3	RP5-1120P11.4	ATACAAATGTCTTAATGGGG	t8:21
RP5-1195D24.1_1	RP5-1195D24.1	GATTCAGTCTTCACGGTGCT	GMP
RP5-1195D24.1_2	RP5-1195D24.1	ACGGTGCTCGGCTGACCCCA	GMP
RP5-1195D24.1_3	RP5-1195D24.1	GAGCACCGTGAAGACTGAAT	GMP
RP5-942I16.1_1	RP5-942I16.1	GGTCTAACGGGTCCTCGAGC	HSPC
RP5-942I16.1_2	RP5-942I16.1	ACTGCGGTTTGCCGGTCTAA	HSPC
RP5-942I16.1_3	RP5-942I16.1	AAAAGTAAAGGAAGCCCGCG	HSPC
RP5-994D16.3_1	RP5-994D16.3	CACTTGAGGTAAGTATTGAC	HSC_SpotA
RP5-994D16.3_2	RP5-994D16.3	GCTCAGTTCTTCCAGGTGTT	HSC_SpotA
RP5-994D16.3_3	RP5-994D16.3	TCCAGAAGCTCAGTTCTTCC	HSC_SpotA
RPL13AP_1	RPL13AP	ATGCGGCTAGGGCCGAGAAA	GMP
RPL13AP_2	RPL13AP	TCCGCTTGCGGAGAAAGCCC	GMP
RPL13AP_3	RPL13AP	AGCGGATGAACACCTTCTGG	GMP
RPL13AP6_1	RPL13AP6	GTGGTGGTCGTACGCTGCAA	GMP
RPL13AP6_2	RPL13AP6	GTTTAGCCACGATGGTCGCC	GMP
RPL13AP6_3	RPL13AP6	GGGCCGCCTGGCGACCATCG	GMP
RPL13P6_1	RPL13P6	GGCTTCCATGCCATTCTGGC	GMP
RPL13P6_2	RPL13P6	CCCGAAGATCCGCAGATGCA	GMP
RPL13P6_3	RPL13P6	GCATCTGCGGATCTTCGGGC	GMP
RPL17P46_1	RPL17P46	TTTGGGTATGCATACCTTGA	HSPC
RPL17P46_2	RPL17P46	TGATGGCCTGCACAGTTACA	HSPC
RPL17P46_3	RPL17P46	GAACACCCATGTAACTGTGC	HSPC
RPL21P104_1	RPL21P104	AGGGCTAGGAAACATACATC	HSC_SpotA
RPL21P104_2	RPL21P104	CTTATAGATTCGCATGTGTG	HSC_SpotA
RPL21P104_3	RPL21P104	ATTCGCATGTGTGTGGTCAA	HSC_SpotA
RPL21P17_1	RPL21P17	GGTGATATTACAGACATCAA	HSC_SpotB
RPL21P17_2	RPL21P17	CTTATAGATTCACATATATG	HSC_SpotB
RPL21P17_3	RPL21P17	TATTACAGACATCAAGGGAA	HSC_SpotB
RPL26P34_1	RPL26P34	ATGCACCTTCCCACATTCGT	t8:21
RPL26P34_2	RPL26P34	GCTGAGACAGAAGCACATTC	t8:21
RPL26P34_3	RPL26P34	ACATAATCTTCCTACGAATG	t8:21
RPL26P9_1	RPL26P9	CTTGCTGTCAGAAGTCACAA	HSC_SpotA
RPL26P9_2	RPL26P9	GTGCATTGAAATACCTTTTA	HSC_SpotA
RPL26P9_3	RPL26P9	ATTGTTCTGTGAACATGGGA	HSC_SpotA
RPL34P21_1	RPL34P21	GCACACGCCACTGCAGGTGT	GMP
RPL34P21_2	RPL34P21	TGACTTAGAGGGCTTCATGC	GMP
RPL34P21_3	RPL34P21	AATAACCTCATAAGAACTCC	GMP
RPL36P19_1	RPL36P19	GCAAGCCGAGGCATAGCCGC	HSPC
RPL36P19_2	RPL36P19	CCAAGAACACAAGCAAGCCG	HSPC
RPL36P19_3	RPL36P19	CATGGCTCTGCATTACTCCG	HSPC
RPL5P18_1	RPL5P18	TCAGCAATGCTTGGTGATAC	t8:21
RPL5P18_2	RPL5P18	TTATTATTCTCAGCAATGCT	t8:21
RPL5P18_3	RPL5P18	TATTAAAGTTGTTAACAATA	t8:21
RPL5P29_1	RPL5P29	TTACTATGCTCGGAAACGCT	t8:21
RPL5P29_2	RPL5P29	CTTGGTATATCTCTTAAAGT	t8:21
RPL5P29_3	RPL5P29	TGTTAAAGTTGTTAAGAGTA	t8:21
RPL5P35_1	RPL5P35	GAAATTTAGACGATGAGGCG	t8:21
RPL5P35_2	RPL5P35	CAAGTGAAATTTAGACGATG	t8:21
RPL5P35_3	RPL5P35	AACACCACATATCCAAATAC	t8:21
RPL6P21_1	RPL6P21	CAATGAAGCTTCCCTTTCGT	HSC_SpotA
RPL6P21_2	RPL6P21	CCAAGAGGGCTGATGGTGAC	HSC_SpotA
RPL6P21_3	RPL6P21	AAGCTAAAAAGCCCACGAAA	HSC_SpotA
RPL6P25_1	RPL6P25	GACAGGATTGCGGCTGCAAT	HSC_SpotA
RPL6P25_2	RPL6P25	GGTGAAAAAGGATAACCTCA	HSC_SpotA
RPL6P25_3	RPL6P25	GAAAAAACTCAGAGCCAAGA	HSC_SpotA
RPL7AP23_1	RPL7AP23	TCCTGCTTCTTCGTGACACC	t8:21
RPL7AP23_2	RPL7AP23	CACGGAATTTACCACCTTCT	t8:21
RPL7AP23_3	RPL7AP23	GGTTTGGATGTGCTGTCCAA	t8:21
RPL7P50_1	RPL7P50	AAACTTCTTTCTCAGGCGCT	GMP
RPL7P50_2	RPL7P50	TGCCCAAAAGATGCTTCGAA	GMP
RPL7P50_3	RPL7P50	AAACCCCTAAGAAAAAGCGA	GMP
RPS15AP34_1	RPS15AP34	TGCCCTTGAGAGCATCAGTC	t8:21
RPS15AP34_2	RPS15AP34	TATCCTGACTGATGCTCTCA	t8:21
RPS15AP34_3	RPS15AP34	AGCACAGCCTAATGAGAAAC	t8:21
RPS3AP30_1	RPS3AP30	CTTGTTCTTAACAACCGCCA	GMP
RPS3AP30_2	RPS3AP30	TACTGATCTTTCATAGAGAA	GMP
RPS3AP30_3	RPS3AP30	GGAGTGAAGAAGAAAGTAGT	GMP
RPS3AP33_1	RPS3AP33	GGAGTTAAGAAGAAAGTAGT	t8:21
RPS3AP33_2	RPS3AP33	TACTGATCTTTCTTAGAGAA	t8:21
RPS3AP33_3	RPS3AP33	AAGAACAAGTGCCTTATGAA	t8:21
RPS4XP19_1	RPS4XP19	ATCGATGAGGAGCAAACACG	GMP
RPS4XP19_2	RPS4XP19	ACTCTCTTAGCTTGTGGGGA	GMP
RPS4XP19_3	RPS4XP19	AGCTCCATAGCATTTGATGC	GMP
RPS6P16_1	RPS6P16	TACGCAGTCTGAATCAGTGG	GMP
RPS6P16_2	RPS6P16	CTGATGCTCTGGGTAAACAC	GMP
RPS6P16_3	RPS6P16	TACCCAGCAGCAGGCAGATA	GMP
RSL24D1P4_1	RSL24D1P4	TGCGGATGAACGTTATGCCA	t8:21
RSL24D1P4_2	RSL24D1P4	ATGAACGTTATGCCATGGCC	t8:21
RSL24D1P4_3	RSL24D1P4	GTTCATCCGCAATGATTGCA	t8:21
RSL24D1P8_1	RSL24D1P8	AGTGCAATCCTCACAAGGTT	HSC_SpotB, t8:21
RSL24D1P8_2	RSL24D1P8	GTTCTTCTGCAACAATTGCA	HSC_SpotB, t8:21
RSL24D1P8_3	RSL24D1P8	AAAGAAGTGCAATCCTCACA	HSC_SpotB, t8:21
SAP30L-AS1_1	SAP30L-AS1	GCCCGGTTCCCGGTTCTCGC	HSC_SpotA
SAP30L-AS1_2	SAP30L-AS1	AGAGTTACCCCAGCGAGAAC	HSC_SpotA
SAP30L-AS1_3	SAP30L-AS1	GAACCGGGCTGCAGACTCTC	HSC_SpotA
SEC13P1_1	SEC13P1	CACTGTGGATACCTCCCATA	AMKL
SEC13P1_2	SEC13P1	ATAAATCATATCCTTATGGG	AMKL
SEC13P1_3	SEC13P1	TATGATTTATGATGCCCAGA	AMKL
SETP22_1	SETP22	ATTTGGAGGCCATGCTGCTA	HSC_SpotB
SETP22_2	SETP22	GAGTGGAGACTGGCGTTTGG	HSC_SpotB
SETP22_3	SETP22	GCTCTGGGACTGGAGGTTCT	HSC_SpotB
SLC25A21-AS1_1	SLC25A21-AS1	AAAACTAAGTCAGACCGAAC	DSAMKL
SLC25A21-AS1_2	SLC25A21-AS1	CTTGCTTTACAGGCTAGGAA	DSAMKL
SLC25A21-AS1_3	SLC25A21-AS1	CCCCAAGGGCAGCGACTTTG	DSAMKL
SMG1P1_1	SMG1P1	AACCCGCCTCCCGGCTCCGC	AMKL
SMG1P1_2	SMG1P1	CTCCGCGGCCCCGGCGACGT	AMKL
SMG1P1_3	SMG1P1	GCCGGGAGGCGGGTTAGCAG	AMKL
SMG1P3_1	SMG1P3	GCCATGCTCTGCTTACCGGC	HSC_SpotB
SMG1P3_2	SMG1P3	TTCCTTCTCCTCGGCCACCG	HSC_SpotB
SMG1P3_3	SMG1P3	GCACAATCCTCGCTCGGCTG	HSC_SpotB
SNAI3-AS1_1	SNAI3-AS1	GGATCGCCGACGCGGACGCC	GMP
SNAI3-AS1_2	SNAI3-AS1	CAGACCCCGGATCGCCGACG	GMP
SNAI3-AS1_3	SNAI3-AS1	GCGTCCGCGTCGGCGATCCG	GMP
SNAI3-AS1_4	SNAI3-AS1	TGTGCGGGGGGCTGTGCGAA	GMP
SNAI3-AS1_5	SNAI3-AS1	GGCCCGTGAGGAGCTGTGCG	GMP
SNAI3-AS1_6	SNAI3-AS1	AGGTGGGCGCTGTTGCCTGT	GMP
SNAP25-AS1_1	SNAP25-AS1	AGGGCGCCCGCGCGAGCCCT	AMKL
SNAP25-AS1_2	SNAP25-AS1	CCCCGGTGCTGAAAGGTCGA	AMKL
SNAP25-AS1_3	SNAP25-AS1	AGCAACACCGAGGGCTCGCG	AMKL
SNHG7_1	SNHG7	CCGGTGAGGCGCTCGAGAAC	GMP
SNHG7_2	SNHG7	GCGCTCGAGAACTGGCCGGG	GMP
SNHG7_3	SNHG7	CAGTTCTCGAGCGCCTCACC	GMP
SNX5P1_1	SNX5P1	GAATGTTGATCCCTCGCTTC	HSC_SpotB, t8:21
SNX5P1_2	SNX5P1	GGTATGTCAACCTGAAGCGA	HSC_SpotB, t8:21
SNX5P1_3	SNX5P1	GCTCTGAAACATGGGCAGTG	HSC_SpotB, t8:21
SOX21-AS1_1	SOX21-AS1	TCCGGGCAGGGTGCGCCGAT	GMP
SOX21-AS1_2	SOX21-AS1	ATGGGAAACCCCCAATCGGC	GMP
SOX21-AS1_3	SOX21-AS1	CGTCAGTCCAGCAGCGGGAG	GMP
SPATA41_1	SPATA41	TCTTTCAGCATTGCCGCATC	HSC_SpotA
SPATA41_2	SPATA41	TGATGCGGCAATGCTGAAAG	HSC_SpotA
SPATA41_3	SPATA41	CTAGGAGAGAAACGGGGCTT	HSC_SpotA
ST7-AS1_1	ST7-AS1	AGTTGCGTCTTGCCGGGCGT	DSAMKL
ST7-AS1_2	ST7-AS1	GGCCCGGAGTTGCGTCTTGC	DSAMKL
ST7-AS1_3	ST7-AS1	CGGACAGCCCGGCCGGGTCA	DSAMKL
ST8SIA6-AS1_1	ST8SIA6-AS1	CGTACGTGGAACTCACCAAT	DSAMKL
ST8SIA6-AS1_2	ST8SIA6-AS1	TGGAACTCACCAATAGGTTC	DSAMKL
ST8SIA6-AS1_3	ST8SIA6-AS1	CAAAAGAGCCCAGAACCTAT	DSAMKL
ST8SIA6-AS1_4	ST8SIA6-AS1	CCCAGGGAGGCTGACGTACG	DSAMKL
ST8SIA6-AS1_5	ST8SIA6-AS1	TGCTCCAAAGAAAAGCCGGA	DSAMKL
STRADBP1_1	STRADBP1	GACCAAGTATTGATGGATAC	DSAMKL
STRADBP1_2	STRADBP1	GCTCTTCGACCAAGTATTGA	DSAMKL
STRADBP1_3	STRADBP1	TCGAAGAGCCAACCCTTTCC	DSAMKL
TBC1D27_1	TBC1D27	ACAAGATAAACAGCGATGTC	GMP
TBC1D27_2	TBC1D27	CGATGTCTGGTTCTGCTCAG	GMP
TBC1D27_3	TBC1D27	TCTTAAGTGAGAGGCACAGT	GMP
TCEB1P20_1	TCEB1P20	GTCAAATTGATATCATCTAG	t8:21
TCEB1P20_2	TCEB1P20	AGGGCCTTCACAGTCACCAT	t8:21
TCEB1P20_3	TCEB1P20	AAGGCTATGTTGAGTGGCCC	t8:21
TERF1P1_1	TERF1P1	TAGAGATGCCGACCCTACCG	HSC_SpotB
TERF1P1_2	TERF1P1	CGACCCTACCGAGGAGCAGA	HSC_SpotB
TERF1P1_3	TERF1P1	CTGCCATCTGCTCCTCGGTA	HSC_SpotB
TMEM178A_1	TMEM178A	CGGACTGTGGATCGGAGGTA	HSC_SpotA, HSPC
TMEM178A_2	TMEM178A	AGTCGGGGGAAAGTAGGGAC	HSC_SpotA, HSPC
TMEM178A_3	TMEM178A	GAGGGCGGACTGTGGATCGG	HSC_SpotA, HSPC
TMEM254-AS1_1	TMEM254-AS1	CTGACGAACGAGCGAGCGCT	AMKL
TMEM254-AS1_2	TMEM254-AS1	TCGCTGAAAGTAGGTCGCGC	AMKL
TMEM254-AS1_3	TMEM254-AS1	TACACAGTAAGGACAGCCGC	AMKL
TMEM254-AS1_4	TMEM254-AS1	GGCTGGGCTACTTCGCGGTG	AMKL
TMEM254-AS1_5	TMEM254-AS1	ATAGGCGGTAGCCGCATTGC	AMKL
TMEM254-AS1_6	TMEM254-AS1	AGCAAGCATACTGGTCCGCC	AMKL
TMEM254-AS1_7	TMEM254-AS1	CCCTGAGAAACCGGCTAGCC	AMKL
TMEM254-AS1_8	TMEM254-AS1	ATACTGGTCCGCCAGGGTCT	AMKL
TNK2-AS1_1	TNK2-AS1	AGGCACCCCTACTGCCATCG	HSC_SpotA
TNK2-AS1_2	TNK2-AS1	CCTGCCCCCCGATGGCAGTA	HSC_SpotA
TNK2-AS1_3	TNK2-AS1	CCCTACTGCCATCGGGGGGC	HSC_SpotA
TPM3P2_1	TPM3P2	CGCCTCCAGCGGGGAGTAGA	HSC_SpotB
TPM3P2_2	TPM3P2	AGAGCTAAGCGCCTCCAGCG	HSC_SpotB
TPM3P2_3	TPM3P2	TTGCTCCCTCTACTCCCCGC	HSC_SpotB
TTC3P1_1	TTC3P1	AAGACACAATCGTCCACGTA	CMP
TTC3P1_2	TTC3P1	GTTAGAAGATTGCCCTTACG	CMP
TTC3P1_3	TTC3P1	AGTCACACGAACATAATCAT	CMP
TTTY14_1	TTTY14	GATGGACCGAGATCTTCAGT	GMP
TTTY14_2	TTTY14	AGCCTGCACCAGCGCCGGGT	GMP
TTTY14_3	TTTY14	CCAATGGCTGTGACGGATAA	GMP
TUNAR_1	TUNAR	GGCGGCGTCGGGGTCCCTAC	AMKL
TUNAR_2	TUNAR	CGAGGTGCCCCTCCCCTGTA	AMKL
TUNAR_3	TUNAR	GGCACCTCGGCGGCAGCAAT	AMKL
U47924.6_1	U47924.6	GTATAGAGCGGTAACTGCCC	GMP
U47924.6_2	U47924.6	CCTCGGAGCTGCACGGCCGT	GMP
U47924.6_3	U47924.6	CTCTATACCGGCAGCAGCCG	GMP
U91328.2_1	U91328.2	TATTTTGAGCCGGTCGGAGC	HSC_SpotB, HSPC
U91328.2_2	U91328.2	AAAAACTTGTTCGTCGCTAC	HSC_SpotB, HSPC
U91328.2_3	U91328.2	ACTGGCGCACCGGCTCCGAC	HSC_SpotB, HSPC
UBE2WP1_1	UBE2WP1	TGCAAAATGACCCACCTCCT	HSC_SpotA
UBE2WP1_2	UBE2WP1	TCATTTAAAGTCATCCCAGG	HSC_SpotA
UBE2WP1_3	UBE2WP1	TGACCATTGCTATAATCATG	HSC_SpotA
USP12PX_1	USP12PX	TACCATGGGCGCCAATGCTT	HSC_SpotB
USP12PX_2	USP12PX	CCAAAATAATGCTCGTTGAC	HSC_SpotB
USP12PX_3	USP12PX	TGCCGAAGCATTGGCGCCCA	HSC_SpotB
VENTXP7_1	VENTXP7	GGCCTGCCGACGTCTCCCCC	HSC_SpotA
VENTXP7_2	VENTXP7	GAGGCTCCCGGGGGAGACGT	HSC_SpotA
VENTXP7_3	VENTXP7	GTCCACGGAGCCAAAGCTGG	HSC_SpotA
WASH7P_1	WASH7P	ACCCGGAGCGCTGTCCTGTC	GMP
WASH7P_2	WASH7P	GGCCCGCGACTCGGCCCGAC	GMP
WASH7P_3	WASH7P	CACTGCGCCCTCCCCGAGCG	GMP
WI2-89927D4.1_1	WI2-89927D4.1	ACACCCGGACGTGAAGTGCG	HSC_SpotA
WI2-89927D4.1_2	WI2-89927D4.1	TGCAATTTATGCTGCACACC	HSC_SpotA
WI2-89927D4.1_3	WI2-89927D4.1	GCACCACGCACTTCACGTCC	HSC_SpotA
YWHAEP4_1	YWHAEP4	TTCTTATATCAACAGATAGG	HSC_SpotA
YWHAEP4_2	YWHAEP4	GCTGCTGATTATTCTCTAAG	HSC_SpotA
YWHAEP4_3	YWHAEP4	TGTTGATATAAGAATGTGAT	HSC_SpotA
YWHAZP3_1	YWHAZP3	GGCTGAGCGATATGATGACA	HSC_SpotB
YWHAZP3_2	YWHAZP3	CTGAATTATCCAATGAGGAA	HSC_SpotB
YWHAZP3_3	YWHAZP3	GAGGAGATTCCTTTCCTCAT	HSC_SpotB
ZBED3-AS1_1	ZBED3-AS1	TCATCTGTCCCAACCTAGGT	HSPC
ZBED3-AS1_2	ZBED3-AS1	CAGATGAAGGCGGCGCTTAT	HSPC
ZBED3-AS1_3	ZBED3-AS1	CCAAAGCTGGTACACCATGC	HSPC
ZEB1-AS1_1	ZEB1-AS1	GCGGATGCCGGGAAACCGTA	CMP
ZEB1-AS1_2	ZEB1-AS1	AGGCGACGGGCTGTCGGAGT	CMP
ZEB1-AS1_3	ZEB1-AS1	GCCGGGAAACCGTAGGGACG	CMP
ZNF252P_1	ZNF252P	GAACGCTAAATCCCGTGCCG	AMKL
ZNF252P_2	ZNF252P	GAGTCCCGAGCTAGGGCGCC	AMKL
ZNF252P_3	ZNF252P	GGCTTGGCTCCCCGCGGCAC	AMKL
ZNF32-AS2_1	ZNF32-AS2	ACTGAAGAACGCTACATTCT	HSC_SpotA
ZNF32-AS2_2	ZNF32-AS2	CAGCACTGGTCGGCAGTCTG	HSC_SpotA
ZNF32-AS2_3	ZNF32-AS2	TGAGTGAGTCAGTTGATGGC	HSC_SpotA
ZNF37BP_1	ZNF37BP	GCCGGGGGTAGAGTACGGGA	t8:21
ZNF37BP_2	ZNF37BP	TTCGGGGCAGAGGATGCCGG	t8:21
ZNF37BP_3	ZNF37BP	GCCCTCCCGTACTCTACCCC	t8:21
ZNF814_1	ZNF814	ATAGCACAAACCGGAGAAAT	DSAMKL
ZNF814_2	ZNF814	TCCGGTTTGTGCTATTATGA	DSAMKL
ZNF814_3	ZNF814	GCCTTCATAATAGCACAAAC	DSAMKL
ZNF969P_1	ZNF969P	TGAGGAAGAGCTGCTATCCC	t8:21
ZNF969P_2	ZNF969P	TATATAATTCTCAGTGGAGT	t8:21
ZNF969P_3	ZNF969P	AGGGATAGCAGCTCTTCCTC	t8:21
ZSCAN12P1_1	ZSCAN12P1	GCGATTGTCCTGTGGCGTCC	HSC_SpotA
ZSCAN12P1_2	ZSCAN12P1	TGGTTAGGAGCAGGATTTCG	HSC_SpotA
ZSCAN12P1_3	ZSCAN12P1	GGCGTCCGGGACCGAGTTTG	HSC_SpotA
ZSCAN16-AS1_1	ZSCAN16-AS1	CCCGAAAACGCTACGTGAGC	GMP
ZSCAN16-AS1_2	ZSCAN16-AS1	AGCTCACGTAGCGTTTTCGG	GMP
ZSCAN16-AS1_3	ZSCAN16-AS1	GTTTGGGAACCGTTAGCAAC	GMP
