# Supplementary material for: Myeloid leukemia vulnerabilities at CTCF-enriched long noncoding RNA loci
Source: Research Square preprint supplement (doi:10.21203/rs.3.rs-727909/v1), 2021-08-09
Supplement: Supplementary file 2 [file 10ba773d51608cce2533f71e.xlsx]

## Sheet: STable10
Supplementary Table 10: C-LNC library sequences
sgRNA_name	gene3	gRNA	purpose
MYC_1	MYC	CTTCGGGGAGACAACGACGG	controls
MYC_2	MYC	AGAGTGCATCGACCCCTCGG	controls
MYC_3	MYC	CTGCGGGGAGGACTCCGTCG	controls
MYC_4	MYC	GCTGCACCGAGTCGTAGTCG	controls
MYC_5	MYC	GAAGGGTGTGACCGCAACGT	controls
POLR2A_1	POLR2A	TGGGGGGTGACAATCATGCG	controls
POLR2A_2	POLR2A	GTCTGGAGCATACAACGTTG	controls
POLR2A_3	POLR2A	CTTCAAGAACTAGTGCGCAG	controls
POLR2A_4	POLR2A	CATGCGGCGGGAACACAACG	controls
POLR2A_5	POLR2A	GGCGTGGAAAAAGAACTCAG	controls
U2AF1_1	U2AF1	AAACAAACCTGGCTAAACGT	controls
U2AF1_2	U2AF1	GGTGGGGAACGTGTACGTCA	controls
U2AF1_3	U2AF1	TGATTGACTTGAATAACCGT	controls
U2AF1_4	U2AF1	CTCACCCCATCTCATACTGA	controls
U2AF1_5	U2AF1	GCTGCCGTCAGTATGAGATG	controls
MYB_1	MYB	AGTCTGGAAAGCGTCACTTG	controls
MYB_2	MYB	ACCAGGCACACAAGAGACTG	controls
MYB_3	MYB	TATTTACATGTAACGCTACA	controls
MYB_4	MYB	AGAAATACGGTCCGAAACGT	controls
MYB_5	MYB	GTCACTTGGGGAAAACAAGG	controls
RPL9_1	RPL9	GGGTGAAAAATATATCCGCA	controls
RPL9_2	RPL9	CCTGGATAACAACGTTGATG	controls
RPL9_3	RPL9	TCTAGTCGACATTACTCTGA	controls
RPL9_4	RPL9	ATGACTACAAATAGTCCGAA	controls
RPL9_5	RPL9	TGGGTGAAAAATATATCCGC	controls
EIF6_1	EIF6	GGCCACGTAGTCATTGCAGG	controls
EIF6_2	EIF6	TCCGATCGCTACCAGACAGT	controls
EIF6_3	EIF6	CGATAGACGCGTGCACCACG	controls
EIF6_4	EIF6	AGACACAGTGCAGATTAGGC	controls
EIF6_5	EIF6	CAGGCGGGGACTGTGAACCG	controls
PPP1R12C_1	PPP1R12C	CATGGACTCACTGACCCATG	controls
PPP1R12C_2	PPP1R12C	AATTGCTCCTTCATGACACG	controls
PPP1R12C_3	PPP1R12C	TACCTAGATATCGCCAGGTG	controls
PPP1R12C_4	PPP1R12C	AATGAATTGATGCAGGTCTG	controls
PPP1R12C_5	PPP1R12C	TGCTGCCAAGGGCTACATTG	controls
FAM71A_1	FAM71A	AGAGATCCGTACAAACCTCA	controls
FAM71A_2	FAM71A	GTCATCCCGTGTGTCAAGAG	controls
FAM71A_3	FAM71A	GCAGCGACAACTGTACAAGG	controls
FAM71A_4	FAM71A	CCATGGTCACCATACGGACA	controls
FAM71A_5	FAM71A	GAGATCCGTACAAACCTCAG	controls
SLC22A13_1	SLC22A13	GAGTTTCCGCCTATTGACCG	controls
SLC22A13_2	SLC22A13	CCTACGGTTTCCGCAACTGG	controls
SLC22A13_3	SLC22A13	TCACAAACCAGGTTGAACTG	controls
SLC22A13_4	SLC22A13	GCCATGTAGAGCTCAAAGCT	controls
SLC22A13_5	SLC22A13	GCAGAGGGGCCCAAACATGA	controls
TMEM225_1	TMEM225	CATTAAGACTACGGCCCAGG	controls
TMEM225_2	TMEM225	GTAAGCAGTATACATGATCC	controls
TMEM225_3	TMEM225	GCAGGGCAACACATCATCCA	controls
TMEM225_4	TMEM225	GATAGGTGAATTTCATACCC	controls
TMEM225_5	TMEM225	TGTGCACGGACAATGCTACG	controls
TAAR1_1	TAAR1	GATCACACACAGCATAGTAG	controls
TAAR1_2	TAAR1	ATGAATGAGCCAATTTGTTG	controls
TAAR1_3	TAAR1	ATAATTCTGACCACACTCGT	controls
TAAR1_4	TAAR1	TTTCTGGAGCTAAACTTCAA	controls
TAAR1_5	TAAR1	GAAAGACAAATGGAAAATGG	controls
COL20A1_1	COL20A1	CTCAGACGTGAGCCACGACG	controls
COL20A1_2	COL20A1	CCTACAGGGGGTATAGCGGA	controls
COL20A1_3	COL20A1	CAAACGATCAGATACTTGAG	controls
COL20A1_4	COL20A1	AGGTGTGAAGAACGCCGATG	controls
COL20A1_5	COL20A1	GTAGACAAGCACGCCAGACG	controls
TEX28_1	TEX28	CAGGAGGAGAAGTGTAGGTG	controls
TEX28_2	TEX28	AAGCGACTCTCCAAGATGAA	controls
TEX28_3	TEX28	GGAGTCCTATCACAGCCTAA	controls
TEX28_4	TEX28	ACAACTTACAGGATAGTGTC	controls
TEX28_5	TEX28	GGAGACAAAGACCAAGAGGA	controls
PRSS38_1	PRSS38	AAAATCTATGACATGTACGT	controls
PRSS38_2	PRSS38	TGGGGACTAGTCTCAAAACA	controls
PRSS38_3	PRSS38	GGTGGTACATCTCATATGTG	controls
PRSS38_4	PRSS38	GCGGCGTCCCTGCGCCCGAG	controls
PRSS38_5	PRSS38	ATGGAGGGGAAAATCCTGGG	controls
NEUROD2_1	NEUROD2	CGTCGGCGCCTTGCTCCGTG	controls
NEUROD2_2	NEUROD2	TTCTGCGTCTTGGAGTAGCA	controls
NEUROD2_3	NEUROD2	ACGGCGAAGACGACGAGCCG	controls
NEUROD2_4	NEUROD2	GAGTCTGCACGTAGGACACT	controls
NEUROD2_5	NEUROD2	AGAGTTGAGCTGCAGACAGC	controls
SLC6A18_1	SLC6A18	GTGGCCTACCTACTCCACTG	controls
SLC6A18_2	SLC6A18	GTGTACATGTGTGTCATCAG	controls
SLC6A18_3	SLC6A18	AGCGATGGACGCGTACAGGG	controls
SLC6A18_4	SLC6A18	CCGGTACCAGAAGTAGCTCA	controls
SLC6A18_5	SLC6A18	GCAGTCTGGGAACTACTGGC	controls
TMEM132D_1	TMEM132D	AGTCAGACGTGATCTCTCCG	controls
TMEM132D_2	TMEM132D	AATGAAAGGCAAGGTCAACG	controls
TMEM132D_3	TMEM132D	ACTATATACCAAAGACCGTG	controls
TMEM132D_4	TMEM132D	ACTGCGTCAGGGAAGACGCG	controls
TMEM132D_5	TMEM132D	GATGGAGAAAGGCCCGTAGC	controls
C7orf66_2	C7orf66	TTACCTGAAACAGCATTGCA	controls
C7orf66_3	C7orf66	AGCTCAATATCGTCACATGA	controls
C7orf66_4	C7orf66	CTGACATCACTGGATGCAAT	controls
KRTAP1-1_1	KRTAP1-1	GCTAGAGTCACAAGTCCCAC	controls
KRTAP1-1_2	KRTAP1-1	TGCTACCAGACCAGCTCCTG	controls
KRTAP1-1_3	KRTAP1-1	GCTAGGAAATCCACAGAAGC	controls
KRTAP1-1_4	KRTAP1-1	CAGCTGGTCTCACAGCAGCG	controls
KRTAP1-1_5	KRTAP1-1	GGATTTCCTAGCTTCTCAAC	controls
POU5F2_1	POU5F2	CGGGGCCCTACATTGCCCTG	controls
POU5F2_2	POU5F2	TCCCACAGCGATCCCCACAT	controls
POU5F2_3	POU5F2	AGCTAAGCGTCGCCAACATG	controls
POU5F2_4	POU5F2	AGAGTTGCAGCAATTGGCCA	controls
POU5F2_5	POU5F2	GTTGAGCCTAGGGTACTCGC	controls
LUC1_1	LUC1	GGTATAATACACCGCGCTAC	controls
LUC1_2	LUC1	CACATATTGAGCCAGTAGCG	controls
LUC1_3	LUC1	TTGCCCATACCAATAAGGTC	controls
LUC1_4	LUC1	GGATGATAACTGGTCCGCAG	controls
LUC1_5	LUC1	GATAACTGGTCCGCAGTGGT	controls
LUC1_6	LUC1	CTTATTGGTATGGGCAAATC	controls
LUC1_7	LUC1	CGCGCTACTGGCTCAATATG	controls
LUC1_8	LUC1	TGTATTATACCAGACCTTAT	controls
LUC1_9	LUC1	TGATAACTGGTCCGCAGTGG	controls
LUC1_10	LUC1	CCATGATTGGGGTGCTTGTT	controls
LUC2_1	LUC2	CATAGCTTCTGCCAACCGAA	controls
LUC2_2	LUC2	CCTCTAGAGGATGGAACCGC	controls
LUC2_3	LUC2	AATACTTCGAAATGTCCGTT	controls
LUC2_4	LUC2	CTTCGAAATGTCCGTTCGGT	controls
LUC2_5	LUC2	CTAGAGGATAGAATGGCGCC	controls
LUC2_6	LUC2	CGCTGGAGAGCAACTGCATA	controls
LUC2_7	LUC2	TCTAGAGGATAGAATGGCGC	controls
LUC2_8	LUC2	CAGAAGCTATGAAACGATAT	controls
LUC2_9	LUC2	AAGAGATACGCCCTGGTTCC	controls
LUC2_10	LUC2	GGCTATGAAGAGATACGCCC	controls
LUC3_1	LUC3	TCCAGCGGATAGAATGGCGC	controls
LUC3_2	LUC3	TTCATTATAAATGTCGTTCG	controls
LUC3_3	LUC3	GGATTCTAAAACGGATTACC	controls
LUC3_4	LUC3	TCATTATAAATGTCGTTCGC	controls
LUC3_6	LUC3	CCCGGCGCCATTCTATCCGC	controls
LUC3_7	LUC3	CCGCTGGAAGATGGAACCGC	controls
LUC3_8	LUC3	GGGCATTTCGCAGCCTACCG	controls
LUC3_10	LUC3	CAATTCTTTATGCCGGTGTT	controls
MSGN1_1	MSGN1	GGATTCCAGCGATGGAGCCG	controls
MSGN1_2	MSGN1	AGGAGCCCAAGCCATCCTCG	controls
MSGN1_3	MSGN1	CGAAGGCTGCAGTGTCGGTG	controls
MSGN1_4	MSGN1	GGAGGCCTGATTCAGCTCAA	controls
MSGN1_5	MSGN1	GAGGCGGAAAGCCAGCGAGA	controls
TGM6_2	TGM6	GAGGTCAGTGATGTCCACGC	controls
TGM6_3	TGM6	GAGAAGCACATACGAGCCCA	controls
TGM6_4	TGM6	CAAAGCTGTGTTCCAGACAT	controls
FGF6_1	FGF6	TCCCGCTGATCCGGCCGTCG	controls
FGF6_2	FGF6	CACCACGCCTCGCTCCACAG	controls
FGF6_3	FGF6	GTCTTCCTAGGCATCCTAGT	controls
FGF6_4	FGF6	GCTAGCTGGAGAGATTGCCG	controls
FGF6_5	FGF6	GTATTTGCTCAGGGCAATGT	controls
OR2T5_1	OR2T5	AGGACAGGATCGTTACAGCA	controls
OR2T5_3	OR2T5	GGACACAGCATAGGTACATG	controls
OR2T5_4	OR2T5	GACAGACCCTATGGTTCATG	controls
GJA8_1	GJA8	GGTGCACTACGTCCGCATGG	controls
GJA8_2	GJA8	CCGGTGGCCCTGCCCCAATG	controls
GJA8_3	GJA8	CGAGAACGTCTGCTACGACG	controls
GJA8_4	GJA8	ATCCCCCCACACGAACTCTG	controls
GJA8_5	GJA8	GTTGAGGAATAGGGACACAG	controls
OR1N2_1	OR1N2	GATCATCAGCTCGTTTACAT	controls
OR1N2_2	OR1N2	CAGCAACAGTGTGTGCATCA	controls
OR1N2_3	OR1N2	ATAGATGTGCTGTAATGGAG	controls
OR1N2_4	OR1N2	TCCTTCTAGGACTCTCTGAG	controls
OR1N2_5	OR1N2	GAGGAACAGAGACATGAAGG	controls
KRT77_1	KRT77	ACAGCATCATCGATGCAGTG	controls
KRT77_2	KRT77	CCCCTCTTGGAGAACTACAT	controls
KRT77_3	KRT77	CTGTGTGTTATGCTCGAGGG	controls
KRT77_4	KRT77	GCATCTCCATTAATCTAATG	controls
KRT77_5	KRT77	AGAACTACATCGGTGACCTG	controls
SLC22A6_1	SLC22A6	TCAAGATGAGTACCTTCCGG	controls
SLC22A6_2	SLC22A6	GTGGATGCCCATTCACACAC	controls
SLC22A6_3	SLC22A6	CCCATCTACCATCGTGACTG	controls
SLC22A6_4	SLC22A6	AAAGGGCAGTCCCCACTGCG	controls
SLC22A6_5	SLC22A6	GTTGTCATAGATCCAGCCAT	controls
CELA3A_1	CELA3A	GTTGGGAAGGATGTCACCAG	controls
CELA3A_2	CELA3A	GGCAGTCACAACCCAATCGG	controls
CELA3A_3	CELA3A	GAGGGATCTGACCTACCAGG	controls
CELA3A_4	CELA3A	CATCCTCACCATGGACAACG	controls
CELA3A_5	CELA3A	CAGGAGGGATCTGACCTACC	controls
OR2T10_1	OR2T10	GCCACACCCAAGGACCGAGA	controls
OR2T10_2	OR2T10	TCAAGTCTATGAGTGAGAGC	controls
OR2T10_3	OR2T10	CATGAAAATCTTGTAAAGTG	controls
OR2T10_4	OR2T10	TTCAGCCAGATCTCACACCC	controls
OR2T10_5	OR2T10	GTACATGGGAGTATGCAGAG	controls
CCKAR_1	CCKAR	GCACCAAGTTGCTATAAATG	controls
CCKAR_2	CCKAR	ATCTCTTTGGAACTCTACCA	controls
CCKAR_3	CCKAR	TGCAAAAGACCAGGCCCCCG	controls
CCKAR_4	CCKAR	CCGTGCTGATTCGGAACAAG	controls
CCKAR_5	CCKAR	GATGGTAAAGGAAAGGCACC	controls
IL3_1	IL3	GGACTTCAACAACCTCAATG	controls
IL3_2	IL3	CCTTCGAAGGCCAAACCTGG	controls
IL3_3	IL3	TTAACCCAGCTTGTCTTCAA	controls
IL3_4	IL3	TTGTCTGGGTCATGGGAGCT	controls
IL3_5	IL3	GTGACTGGAATGAATTCCGG	controls
MTNR1B_1	MTNR1B	AAGGTGCAGGAATAGATGCG	controls
MTNR1B_2	MTNR1B	AGGACACGACAGCGATAGGG	controls
MTNR1B_3	MTNR1B	CCCCTACCCGCTAATCCTCG	controls
MTNR1B_4	MTNR1B	ACCACCGAATCTACCGGCGC	controls
MTNR1B_5	MTNR1B	GATGAGGCAGATGTGCAGAG	controls
RHO_2	RHO	CCGGCTCATACCGCCCAGGG	controls
RHO_3	RHO	AGTACTGTGGGTACTCGAAG	controls
RHO_4	RHO	CATCCTGCTCAACCTAGCCG	controls
B3GNT6_1	B3GNT6	GAGGCGTTCGCCACGCACGG	controls
B3GNT6_3	B3GNT6	CCGGGGTGCCCAATAGAAAG	controls
B3GNT6_4	B3GNT6	GGCGCCAAGGTCCCCGCGGG	controls
XKR7_2	XKR7	CAAGCGCAGCATGCTCACGT	controls
XKR7_3	XKR7	AAGCGGCCGCTGTCCTACAA	controls
XKR7_4	XKR7	CTTCTGCTGGTTCAACGTCA	controls
NANOGNB_2	NANOGNB	AGAAACAATCAGCTATGCCT	controls
NANOGNB_3	NANOGNB	AAGATGAACAGGAAAACAAA	controls
NANOGNB_4	NANOGNB	GCCGAGGCGGGCAGATCACG	controls
RNASE10_1	RNASE10	ACCTCATCTTCACCGAGGAT	controls
RNASE10_2	RNASE10	TGGGCTATGCAACTCTGACT	controls
RNASE10_3	RNASE10	CTGGACCAAAATTCATTGAG	controls
RNASE10_4	RNASE10	TGACTCACAGGACAAAGCTG	controls
RNASE10_5	RNASE10	ATTGCCTGTGAGCTCAAGGG	controls
ACTRT1_1	ACTRT1	TGATTAGACAGGTAGAAACC	controls
ACTRT1_2	ACTRT1	ACGGAGCTGATGACATGGCG	controls
ACTRT1_3	ACTRT1	GGTAACAGGATGGGATGACA	controls
ACTRT1_4	ACTRT1	TTAATCAGAAGTACTTCGTG	controls
ACTRT1_5	ACTRT1	GCAGACATTGTACTCTCCGG	controls
NKX2-2_1	NKX2-2	AATGACAAGGAGACCCCGGG	controls
NKX2-2_2	NKX2-2	GCTACTTACGGGAGTACTGA	controls
NKX2-2_3	NKX2-2	CCTGCCGGACACCAACGATG	controls
NKX2-2_4	NKX2-2	AGGGGCCCGAGCCAGCCAAG	controls
NKX2-2_5	NKX2-2	CCGGGCCGAGAAAGGTATGG	controls
RP11-539E17.3_chr8+:123192828	RP11-539E17.3	TGACGTAGATCATACCTCCT	test
RP11-539E17.3_chr8-:123192831	RP11-539E17.3	TCAATGGCCTCGTGCCAAGG	test
RP11-539E17.3_chr8+:123192835	RP11-539E17.3	GATCATACCTCCTTGGCACG	test
RP11-539E17.3_chr8+:123192848	RP11-539E17.3	TGGCACGAGGCCATTGAAAC	test
RP11-539E17.3_chr8-:123192834	RP11-539E17.3	GTTTCAATGGCCTCGTGCCA	test
RP11-539E17.3_chr8-:123192847	RP11-539E17.3	ACACTTCTGACCTGTTTCAA	test
RP11-539E17.3_chr8-:123192792	RP11-539E17.3	CCAAACAGACCAGCAGCCAG	test
RP11-539E17.3_chr8+:123192803	RP11-539E17.3	CCTCTGGCTGCTGGTCTGTT	test
RP11-539E17.3_chr8+:123192787	RP11-539E17.3	GCCACAGGCCTTGGGACCTC	test
RP11-539E17.3_chr8-:123192734	RP11-539E17.3	CTCAGCTGCATCTGTGCAGA	test
RP11-539E17.3_chr8-:123192733	RP11-539E17.3	TCAGCTGCATCTGTGCAGAG	test
RP11-539E17.3_chr8-:123192777	RP11-539E17.3	GCCAGAGGTCCCAAGGCCTG	test
RP11-539E17.3_chr8-:123192728	RP11-539E17.3	TGCATCTGTGCAGAGGGGAA	test
RP11-539E17.3_chr8+:123192779	RP11-539E17.3	CTCCTGCTGCCACAGGCCTT	test
RP11-539E17.3_chr8+:123192794	RP11-539E17.3	GCCTTGGGACCTCTGGCTGC	test
RP11-539E17.3_chr8-:123192770	RP11-539E17.3	GTCCCAAGGCCTGTGGCAGC	test
RP11-539E17.3_chr8+:123192772	RP11-539E17.3	GTGCTGCCTCCTGCTGCCAC	test
RP11-539E17.3_chr8-:123192767	RP11-539E17.3	CCAAGGCCTGTGGCAGCAGG	test
RP11-539E17.3_chr8+:123192778	RP11-539E17.3	CCTCCTGCTGCCACAGGCCT	test
RP11-539E17.3_chr8-:123192784	RP11-539E17.3	ACCAGCAGCCAGAGGTCCCA	test
RP11-539E17.3_chr8-:123192729	RP11-539E17.3	CTGCATCTGTGCAGAGGGGA	test
RP11-539E17.3_chr8-:123192725	RP11-539E17.3	ATCTGTGCAGAGGGGAAGGG	test
RP11-539E17.3_chr8-:123192735	RP11-539E17.3	ACTCAGCTGCATCTGTGCAG	test
CTD-3093M3.1_chr19+:54031462	CTD-3093M3.1	TCTGGTGGTCGTTATAGATC	test
CTD-3093M3.1_chr19+:54031417	CTD-3093M3.1	AAGTTTATGCGGGGCAGTTT	test
CTD-3093M3.1_chr19+:54031406	CTD-3093M3.1	CTTAAAAGCTCAAGTTTATG	test
CTD-3093M3.1_chr19+:54031468	CTD-3093M3.1	GGTCGTTATAGATCTGGCCG	test
CTD-3093M3.1_chr19+:54031408	CTD-3093M3.1	TAAAAGCTCAAGTTTATGCG	test
CTD-3093M3.1_chr19-:54031449	CTD-3093M3.1	AGATCTATAACGACCACCAG	test
CTD-3093M3.1_chr19-:54031448	CTD-3093M3.1	GATCTATAACGACCACCAGA	test
CTD-3093M3.1_chr19+:54031474	CTD-3093M3.1	TATAGATCTGGCCGTGGAAC	test
CTD-3093M3.1_chr19+:54031407	CTD-3093M3.1	TTAAAAGCTCAAGTTTATGC	test
CTD-3093M3.1_chr19+:54031444	CTD-3093M3.1	AGAAGCTCAGGCAGTCCCTC	test
CTD-3093M3.1_chr19-:54031474	CTD-3093M3.1	TTTCATATCCACCAGTTCCA	test
CTD-3093M3.1_chr19+:54031447	CTD-3093M3.1	AGCTCAGGCAGTCCCTCTGG	test
CTD-3093M3.1_chr19+:54031477	CTD-3093M3.1	AGATCTGGCCGTGGAACTGG	test
CTD-3093M3.1_chr19+:54031493	CTD-3093M3.1	CTGGTGGATATGAAAACAGA	test
RP1-93L7.4_chrX+:85851646	RP1-93L7.4	GCTCATGCGCTTGCTACACT	test
RP1-93L7.4_chrX-:85851557	RP1-93L7.4	GAAAACAAGGATCTCCCAAC	test
RP1-93L7.4_chrX+:85851553	RP1-93L7.4	TTTAGGGGCAAGTTCCCTGT	test
RP1-93L7.4_chrX+:85851684	RP1-93L7.4	GCCTGCACTCAAGCAGGTAG	test
RP1-93L7.4_chrX+:85851609	RP1-93L7.4	TGACTTGCACCACATACTGC	test
RP1-93L7.4_chrX+:85851618	RP1-93L7.4	CCACATACTGCCGGCAGATG	test
RP1-93L7.4_chrX+:85851554	RP1-93L7.4	TTAGGGGCAAGTTCCCTGTT	test
RP1-93L7.4_chrX+:85851652	RP1-93L7.4	GCGCTTGCTACACTTGGTGC	test
RP1-93L7.4_chrX-:85851617	RP1-93L7.4	TGAGCAAGTGCCCCATCTGC	test
RP1-93L7.4_chrX-:85851556	RP1-93L7.4	AAAACAAGGATCTCCCAACA	test
RP1-93L7.4_chrX-:85851674	RP1-93L7.4	TCCTCTACCTGCTTGAGTGC	test
RP1-93L7.4_chrX-:85851570	RP1-93L7.4	ATGTTCAAATCCTGAAAACA	test
RP1-93L7.4_chrX+:85851678	RP1-93L7.4	TCATGTGCCTGCACTCAAGC	test
RP1-93L7.4_chrX-:85851607	RP1-93L7.4	CCCCATCTGCCGGCAGTATG	test
BOLA2P1_chr18-:832376	BOLA2P1	CTAGGCACGCATTCACCAGC	test
BOLA2P1_chr18+:832234	BOLA2P1	GCCCCAGCTGGACTACCGCC	test
BOLA2P1_chr18+:832259	BOLA2P1	ACTCAGCGCCAATTACCTCC	test
BOLA2P1_chr18-:832226	BOLA2P1	TTCCCTGGCGGTAGTCCAGC	test
BOLA2P1_chr18-:832241	BOLA2P1	GTAATTGGCGCTGAGTTCCC	test
BOLA2P1_chr18-:832225	BOLA2P1	TCCCTGGCGGTAGTCCAGCT	test
BOLA2P1_chr18-:832224	BOLA2P1	CCCTGGCGGTAGTCCAGCTG	test
BOLA2P1_chr18-:832444	BOLA2P1	CTCACGGGCCCACTGCTCTG	test
BOLA2P1_chr18-:832322	BOLA2P1	ACTCGGAAGCTACAGGTTGA	test
BOLA2P1_chr18+:832338	BOLA2P1	AACCTGTAGCTTCCGAGTCC	test
BOLA2P1_chr18-:832221	BOLA2P1	TGGCGGTAGTCCAGCTGGGG	test
BOLA2P1_chr18-:832439	BOLA2P1	GGGCCCACTGCTCTGGGGTC	test
BOLA2P1_chr18-:832438	BOLA2P1	GGCCCACTGCTCTGGGGTCA	test
BOLA2P1_chr18-:832339	BOLA2P1	CAGCTGACACCACCAGGACT	test
BOLA2P1_chr18+:832222	BOLA2P1	CGCTGGGCTGCCGCCCCAGC	test
BOLA2P1_chr18+:832372	BOLA2P1	GCTGCTTCAGAGACACCAGC	test
BOLA2P1_chr18-:832238	BOLA2P1	ATTGGCGCTGAGTTCCCTGG	test
BOLA2P1_chr18-:832208	BOLA2P1	GCTGGGGCGGCAGCCCAGCG	test
BOLA2P1_chr18-:832345	BOLA2P1	AAGCAGCAGCTGACACCACC	test
BOLA2P1_chr18-:832263	BOLA2P1	CCCGCTGCAGCTTCTCCTGG	test
BOLA2P1_chr18-:832209	BOLA2P1	AGCTGGGGCGGCAGCCCAGC	test
BOLA2P1_chr18+:832274	BOLA2P1	CCTCCAGGAGAAGCTGCAGC	test
BOLA2P1_chr18+:832301	BOLA2P1	GGAGGCGGAGCATGTGGAGG	test
BOLA2P1_chr18-:832460	BOLA2P1	TCCCTCATTTCTGCTGCTCA	test
BOLA2P1_chr18+:832206	BOLA2P1	GCTGGGGTTCTGTCCCCGCT	test
BOLA2P1_chr18+:832469	BOLA2P1	GCCCGTGAGCAGCAGAAATG	test
BOLA2P1_chr18-:832409	BOLA2P1	GTTCAAAGGCATGGATGTGT	test
BOLA2P1_chr18+:832235	BOLA2P1	CCCCAGCTGGACTACCGCCA	test
BOLA2P1_chr18+:832205	BOLA2P1	AGCTGGGGTTCTGTCCCCGC	test
BOLA2P1_chr18+:832475	BOLA2P1	GAGCAGCAGAAATGAGGGAC	test
BOLA2P1_chr18+:832447	BOLA2P1	AACCCTGACCCCAGAGCAGT	test
BOLA2P1_chr18-:832459	BOLA2P1	CCCTCATTTCTGCTGCTCAC	test
BOLA2P1_chr18+:832190	BOLA2P1	CGTGGCAGGGGTCCGAGCTG	test
BOLA2P1_chr18+:832470	BOLA2P1	CCCGTGAGCAGCAGAAATGA	test
BOLA2P1_chr18+:832298	BOLA2P1	CCTGGAGGCGGAGCATGTGG	test
BOLA2P1_chr18+:832304	BOLA2P1	GGCGGAGCATGTGGAGGTGG	test
BOLA2P1_chr18-:832191	BOLA2P1	GCGGGGACAGAACCCCAGCT	test
BOLA2P1_chr18-:832210	BOLA2P1	CAGCTGGGGCGGCAGCCCAG	test
BOLA2P1_chr18+:832446	BOLA2P1	AAACCCTGACCCCAGAGCAG	test
BOLA2P1_chr18-:832446	BOLA2P1	TGCTCACGGGCCCACTGCTC	test
BOLA2P1_chr18+:832273	BOLA2P1	ACCTCCAGGAGAAGCTGCAG	test
BOLA2P1_chr18-:832445	BOLA2P1	GCTCACGGGCCCACTGCTCT	test
BOLA2P1_chr18-:832256	BOLA2P1	CAGCTTCTCCTGGAGGTAAT	test
BOLA2P1_chr18-:832266	BOLA2P1	GGTCCCGCTGCAGCTTCTCC	test
BOLA2P1_chr18-:832394	BOLA2P1	TGTGTGGGAGCTCTTCTGCT	test
ATP6V1G1P3_chr9+:136780056	ATP6V1G1P3	AGCTGCGGCACTGGAATCCA	test
ATP6V1G1P3_chr9+:136780076	ATP6V1G1P3	TGGCACTGGCAGCACCAAAG	test
ATP6V1G1P3_chr9+:136779981	ATP6V1G1P3	ACAGGCCAAAGAAGCAGCTC	test
ATP6V1G1P3_chr9+:136780082	ATP6V1G1P3	TGGCAGCACCAAAGTGGAGA	test
ATP6V1G1P3_chr9+:136779963	ATP6V1G1P3	AAAGAACTGGAGGCTGACAC	test
ATP6V1G1P3_chr9-:136780062	ATP6V1G1P3	CTTTGGTGCTGCCAGTGCCA	test
ATP6V1G1P3_chr9+:136780047	ATP6V1G1P3	AGCCAAGGAAGCTGCGGCAC	test
ATP6V1G1P3_chr9-:136780038	ATP6V1G1P3	TTCCAGTGCCGCAGCTTCCT	test
ATP6V1G1P3_chr9+:136780032	ATP6V1G1P3	GGAGAAAGAGTTGAAAGCCA	test
ATP6V1G1P3_chr9+:136780091	ATP6V1G1P3	CAAAGTGGAGAAGGAGACCC	test
ATP6V1G1P3_chr9+:136780041	ATP6V1G1P3	GTTGAAAGCCAAGGAAGCTG	test
ATP6V1G1P3_chr9+:136780062	ATP6V1G1P3	GGCACTGGAATCCATGGCAC	test
ATP6V1G1P3_chr9-:136779975	ATP6V1G1P3	TTCAGCCTGAGCTGCTTCTT	test
ATP6V1G1P3_chr9-:136780079	ATP6V1G1P3	CTGGGTCTCCTTCTCCACTT	test
ATP6V1G1P3_chr9+:136780011	ATP6V1G1P3	TGAACAGTACCACCTGCAGA	test
ATP6V1G1P3_chr9+:136780010	ATP6V1G1P3	TTGAACAGTACCACCTGCAG	test
ATP6V1G1P3_chr9-:136780012	ATP6V1G1P3	TCAACTCTTTCTCCCTCTGC	test
ATP6V1G1P3_chr9-:136780238	ATP6V1G1P3	AAAATGCCTATCCAAAGAAC	test
ATP6V1G1P3_chr9-:136780209	ATP6V1G1P3	TCTTCTTCTATCCATTTATG	test
ATP6V1G1P3_chr9+:136780243	ATP6V1G1P3	GAAGCACCTGTTCTTTGGAT	test
ATP6V1G1P3_chr9-:136780266	ATP6V1G1P3	TAAAGCTTCATATTTCATGA	test
ATP6V1G1P3_chr9+:136780238	ATP6V1G1P3	GAAGAGAAGCACCTGTTCTT	test
ATP6V1G1P3_chr9-:136780267	ATP6V1G1P3	CTAAAGCTTCATATTTCATG	test
ATP6V1G1P3_chr9+:136780316	ATP6V1G1P3	AGTCTTATGAAATTATGAAG	test
ATP6V1G1P3_chr9+:136780315	ATP6V1G1P3	TAGTCTTATGAAATTATGAA	test
ATP6V1G1P3_chr9-:136780360	ATP6V1G1P3	CTCAGTCTCTCATCTCCACC	test
ATP6V1G1P3_chr9+:136780314	ATP6V1G1P3	ATAGTCTTATGAAATTATGA	test
ATP6V1G1P3_chr9+:136780356	ATP6V1G1P3	TGCGGGTATTTCTCACCAGG	test
ATP6V1G1P3_chr9+:136780353	ATP6V1G1P3	ACCTGCGGGTATTTCTCACC	test
ATP6V1G1P3_chr9-:136780333	ATP6V1G1P3	AAATACCCGCAGGTGTGGAG	test
ATP6V1G1P3_chr9-:136780338	ATP6V1G1P3	GTGAGAAATACCCGCAGGTG	test
ATP6V1G1P3_chr9-:136780334	ATP6V1G1P3	GAAATACCCGCAGGTGTGGA	test
ATP6V1G1P3_chr9+:136780339	ATP6V1G1P3	ACCTGCCCCTCCACACCTGC	test
ATP6V1G1P3_chr9-:136780329	ATP6V1G1P3	ACCCGCAGGTGTGGAGGGGC	test
ATP6V1G1P3_chr9+:136780338	ATP6V1G1P3	GACCTGCCCCTCCACACCTG	test
AB019438.66_chr14-:106436512	AB019438.66	TAAATCTCGACAGCGCCACC	test
AB019438.66_chr14-:106436442	AB019438.66	GACCTGAATGACTCTCGCCC	test
AB019438.66_chr14+:106436457	AB019438.66	GGCGAGAGTCATTCAGGTCG	test
AB019438.66_chr14+:106436451	AB019438.66	GGCCTGGGCGAGAGTCATTC	test
AB019438.66_chr14+:106436557	AB019438.66	GTCTGTCTTTAGGGAACTGT	test
AB019438.66_chr14+:106436547	AB019438.66	TCTCCTCAGTGTCTGTCTTT	test
AB019438.66_chr14+:106436427	AB019438.66	TAGTTGTCGGTGCCCAGCTT	test
AB019438.66_chr14+:106436567	AB019438.66	AGGGAACTGTAGGTTCCTCC	test
AB019438.66_chr14-:106436539	AB019438.66	TTCCCTAAAGACAGACACTG	test
AB019438.66_chr14-:106436428	AB019438.66	TCGCCCAGGCCTCCCAAGCT	test
AB019438.66_chr14-:106436429	AB019438.66	CTCGCCCAGGCCTCCCAAGC	test
AB019438.66_chr14+:106436436	AB019438.66	GTGCCCAGCTTGGGAGGCCT	test
AB019438.66_chr14+:106436430	AB019438.66	TTGTCGGTGCCCAGCTTGGG	test
AB019438.66_chr14+:106436435	AB019438.66	GGTGCCCAGCTTGGGAGGCC	test
AB019438.66_chr14-:106436485	AB019438.66	GGAGGTGAAGAGCTTCCTGG	test
AB019438.66_chr14+:106436508	AB019438.66	TCTTCACCTCCACCTCCAGG	test
AB019438.66_chr14+:106436505	AB019438.66	AGCTCTTCACCTCCACCTCC	test
AB019438.66_chr14+:106436481	AB019438.66	TCTTCCCGTCCAGCTCCTCC	test
AB019438.66_chr14-:106436475	AB019438.66	AGCTTCCTGGAGGAGCTGGA	test
AB019438.66_chr14-:106436474	AB019438.66	GCTTCCTGGAGGAGCTGGAC	test
AB019438.66_chr14+:106436573	AB019438.66	CTGTAGGTTCCTCCAGGTTC	test
AB019438.66_chr14-:106436488	AB019438.66	GGTGGAGGTGAAGAGCTTCC	test
AB019438.66_chr14-:106436506	AB019438.66	TCGACAGCGCCACCTGGAGG	test
KB-1907C4.2_chr8+:97788120	KB-1907C4.2	AAAACGTCCAACTGTCCAGA	test
KB-1907C4.2_chr8-:97788060	KB-1907C4.2	ATCATTATGAATGTGTTGGT	test
KB-1907C4.2_chr8-:97788137	KB-1907C4.2	TTCCCACAGCAAGCTGAAAA	test
KB-1907C4.2_chr8+:97788153	KB-1907C4.2	TTCAGCTTGCTGTGGGAAGA	test
KB-1907C4.2_chr8-:97788064	KB-1907C4.2	CTGAATCATTATGAATGTGT	test
KB-1907C4.2_chr8-:97788171	KB-1907C4.2	CACATATTTACACTGTGTCA	test
KB-1907C4.2_chr8+:97788159	KB-1907C4.2	TTGCTGTGGGAAGATGGTGA	test
KB-1907C4.2_chr8+:97788123	KB-1907C4.2	ACGTCCAACTGTCCAGATGG	test
KB-1907C4.2_chr8-:97788124	KB-1907C4.2	CTGAAAATGGCGCCACCATC	test
KB-1907C4.2_chr8-:97788116	KB-1907C4.2	GGCGCCACCATCTGGACAGT	test
KB-1907C4.2_chr8-:97788056	KB-1907C4.2	TTATGAATGTGTTGGTTGGC	test
RP11-693N9.1_chr11+:104873417	RP11-693N9.1	TCAAGCGAGGCCATAGGTAA	test
RP11-693N9.1_chr11+:104873486	RP11-693N9.1	CCTGTGCTCGCCCTTTAGGT	test
RP11-693N9.1_chr11+:104873491	RP11-693N9.1	GCTCGCCCTTTAGGTGGGCA	test
RP11-693N9.1_chr11+:104873485	RP11-693N9.1	ACCTGTGCTCGCCCTTTAGG	test
RP11-693N9.1_chr11-:104873475	RP11-693N9.1	CCCACCTAAAGGGCGAGCAC	test
RP11-693N9.1_chr11+:104873416	RP11-693N9.1	ATCAAGCGAGGCCATAGGTA	test
RP11-693N9.1_chr11-:104873485	RP11-693N9.1	ATTACCCGTGCCCACCTAAA	test
RP11-693N9.1_chr11+:104873482	RP11-693N9.1	CTGACCTGTGCTCGCCCTTT	test
RP11-693N9.1_chr11+:104873427	RP11-693N9.1	CCATAGGTAAGGGTGCAGCT	test
RP11-693N9.1_chr11-:104873486	RP11-693N9.1	TATTACCCGTGCCCACCTAA	test
RP11-693N9.1_chr11+:104873404	RP11-693N9.1	AATGGCATCATCATCAAGCG	test
RP11-693N9.1_chr11+:104873411	RP11-693N9.1	TCATCATCAAGCGAGGCCAT	test
RP11-693N9.1_chr11+:104873492	RP11-693N9.1	CTCGCCCTTTAGGTGGGCAC	test
RP11-693N9.1_chr11-:104873534	RP11-693N9.1	AAAGTAGCTATGTTTGGACC	test
RP11-693N9.1_chr11-:104873416	RP11-693N9.1	CCCAGCTGCACCCTTACCTA	test
RP11-693N9.1_chr11+:104873426	RP11-693N9.1	GCCATAGGTAAGGGTGCAGC	test
RP11-693N9.1_chr11-:104873468	RP11-693N9.1	AAAGGGCGAGCACAGGTCAG	test
RP11-693N9.1_chr11+:104873527	RP11-693N9.1	AAAGAGCTGGAGAATGGTCC	test
RP11-693N9.1_chr11+:104873433	RP11-693N9.1	GTAAGGGTGCAGCTGGGAGC	test
RP11-693N9.1_chr11+:104873432	RP11-693N9.1	GGTAAGGGTGCAGCTGGGAG	test
RP11-693N9.1_chr11-:104873450	RP11-693N9.1	AGAGGACAGCCCCTGCTCCC	test
RP11-693N9.1_chr11+:104873444	RP11-693N9.1	GCTGGGAGCGGGTGTGGCCT	test
RP11-693N9.1_chr11+:104873451	RP11-693N9.1	GCGGGTGTGGCCTGGGAGCA	test
RPL39P28_chr12-:68001726	RPL39P28	CAGAGAATCTCACGAGCAAG	test
RPL39P28_chr12-:68001683	RPL39P28	TAATGTCTTATGCCCTCTGG	test
RPL39P28_chr12+:68001764	RPL39P28	CATGGTTTGAAATCTCTAGG	test
RPL39P28_chr12-:68001686	RPL39P28	TCTTAATGTCTTATGCCCTC	test
RPL39P28_chr12-:68001673	RPL39P28	TGCCCTCTGGTGGTAAAATC	test
RPL39P28_chr12+:68001704	RPL39P28	GCATAAGACATTAAGAAGTA	test
RPL39P28_chr12+:68001746	RPL39P28	CGTGAGATTCTCTGATTTCA	test
RPL39P28_chr12+:68001761	RPL39P28	TTTCATGGTTTGAAATCTCT	test
RPL39P28_chr12+:68001703	RPL39P28	GGCATAAGACATTAAGAAGT	test
RPL39P28_chr12+:68001658	RPL39P28	AATTCAAAGAAAAATATAGG	test
RPL39P28_chr12+:68001655	RPL39P28	GAGAATTCAAAGAAAAATAT	test
RP11-330C7.4_chr1-:92749244	RP11-330C7.4	GCACCAGTGGTAAAACACCC	test
RP11-330C7.4_chr1+:92749264	RP11-330C7.4	TTTACCACTGGTGCATCTGC	test
RP11-330C7.4_chr1-:92749257	RP11-330C7.4	ACTGCCAGCAGATGCACCAG	test
RP11-330C7.4_chr1-:92749130	RP11-330C7.4	TGTCCTATCTCCTATCTATT	test
RP11-330C7.4_chr1+:92749172	RP11-330C7.4	GTATTATAGTCATGATGATA	test
RP11-330C7.4_chr1+:92749138	RP11-330C7.4	TAGCCAAATAGATAGGAGAT	test
RP11-330C7.4_chr1+:92749131	RP11-330C7.4	TTCTTAATAGCCAAATAGAT	test
RP11-330C7.4_chr1+:92749195	RP11-330C7.4	CTTCTTCACTCCTCCAGTAG	test
RP11-330C7.4_chr1-:92749234	RP11-330C7.4	TAAAACACCCAGGAAGCAAC	test
RP11-330C7.4_chr1-:92749197	RP11-330C7.4	TGCAAGAGTGTGCCCTCTAC	test
AC074338.5_chr7-:33129116	AC074338.5	GTCCATGCACCGCGCGACCG	test
AC074338.5_chr7+:33129131	AC074338.5	GGTCGCGCGGTGCATGGACG	test
AC074338.5_chr7+:33129129	AC074338.5	ACGGTCGCGCGGTGCATGGA	test
AC074338.5_chr7+:33129130	AC074338.5	CGGTCGCGCGGTGCATGGAC	test
AC074338.5_chr7+:33129125	AC074338.5	CGCCACGGTCGCGCGGTGCA	test
AC074338.5_chr7-:33129111	AC074338.5	TGCACCGCGCGACCGTGGCG	test
AC074338.5_chr7-:33129144	AC074338.5	TTCCTGCCGGGACACTCATG	test
AC074338.5_chr7-:33129035	AC074338.5	GGCCCAGTACATATTCACCT	test
AC074338.5_chr7-:33129110	AC074338.5	GCACCGCGCGACCGTGGCGA	test
AC074338.5_chr7-:33129143	AC074338.5	TCCTGCCGGGACACTCATGA	test
AC074338.5_chr7+:33129043	AC074338.5	TCTCCAAGGTGAATATGTAC	test
AC074338.5_chr7-:33129101	AC074338.5	GACCGTGGCGAGGGTGGTCG	test
AC074338.5_chr7+:33129149	AC074338.5	CGGGGCCCTCATGAGTGTCC	test
AC074338.5_chr7+:33129002	AC074338.5	CTTCATCATCTCGATGATCT	test
AC074338.5_chr7-:33129026	AC074338.5	CATATTCACCTTGGAGAAGA	test
AC074338.5_chr7+:33129029	AC074338.5	CCGCCTCGCCTTCTTCTCCA	test
AC074338.5_chr7-:33129018	AC074338.5	CCTTGGAGAAGAAGGCGAGG	test
AC074338.5_chr7-:33129021	AC074338.5	TCACCTTGGAGAAGAAGGCG	test
AC074338.5_chr7+:33129118	AC074338.5	CCACCCTCGCCACGGTCGCG	test
AC074338.5_chr7+:33129110	AC074338.5	TACCGCGACCACCCTCGCCA	test
AC074338.5_chr7-:33129107	AC074338.5	CCGCGCGACCGTGGCGAGGG	test
AC074338.5_chr7+:33129044	AC074338.5	CTCCAAGGTGAATATGTACT	test
RP11-864G5.7_chr11-:102306138	RP11-864G5.7	CAGCATTACAATGTTTGTCA	test
RP11-864G5.7_chr11+:102306162	RP11-864G5.7	TGTAATGCTGTATTAGCTAC	test
RP11-864G5.7_chr11-:102306130	RP11-864G5.7	CAATGTTTGTCATGGCAATC	test
RP11-864G5.7_chr11-:102306259	RP11-864G5.7	CTAATTTCACCATTCATTTG	test
RP11-864G5.7_chr11-:102306131	RP11-864G5.7	ACAATGTTTGTCATGGCAAT	test
RP11-864G5.7_chr11-:102306261	RP11-864G5.7	TACTAATTTCACCATTCATT	test
RP11-864G5.7_chr11-:102306238	RP11-864G5.7	GGTGGGACTCAGCCAACAGG	test
RP11-864G5.7_chr11-:102306239	RP11-864G5.7	GGGTGGGACTCAGCCAACAG	test
RP11-864G5.7_chr11-:102306240	RP11-864G5.7	GGGGTGGGACTCAGCCAACA	test
RP11-864G5.7_chr11-:102306241	RP11-864G5.7	TGGGGTGGGACTCAGCCAAC	test
RP11-864G5.7_chr11-:102306341	RP11-864G5.7	TCTCAGTGAACAGTTTGAGT	test
RP11-864G5.7_chr11+:102306372	RP11-864G5.7	AGAGCCACTCAGTGTGCCCT	test
RP11-864G5.7_chr11+:102306371	RP11-864G5.7	GAGAGCCACTCAGTGTGCCC	test
RP11-864G5.7_chr11-:102306260	RP11-864G5.7	ACTAATTTCACCATTCATTT	test
RP11-864G5.7_chr11-:102306256	RP11-864G5.7	ATTTCACCATTCATTTGGGG	test
RP11-864G5.7_chr11+:102306286	RP11-864G5.7	AAATTAGTAATCATCCCAGC	test
RP11-864G5.7_chr11+:102306373	RP11-864G5.7	GAGCCACTCAGTGTGCCCTG	test
RP11-864G5.7_chr11-:102306255	RP11-864G5.7	TTTCACCATTCATTTGGGGT	test
RP11-864G5.7_chr11+:102306210	RP11-864G5.7	ACATAAACAGCAACAGAAGT	test
RP11-864G5.7_chr11-:102306365	RP11-864G5.7	TTTCCCCAGGGCACACTGAG	test
RP11-864G5.7_chr11+:102306381	RP11-864G5.7	CAGTGTGCCCTGGGGAAAGG	test
RP11-864G5.7_chr11+:102306380	RP11-864G5.7	TCAGTGTGCCCTGGGGAAAG	test
RP11-864G5.7_chr11+:102306261	RP11-864G5.7	TGAGTCCCACCCCAAATGAA	test
RP11-864G5.7_chr11+:102306378	RP11-864G5.7	ACTCAGTGTGCCCTGGGGAA	test
RP11-864G5.7_chr11+:102306382	RP11-864G5.7	AGTGTGCCCTGGGGAAAGGG	test
RP11-864G5.7_chr11+:102306379	RP11-864G5.7	CTCAGTGTGCCCTGGGGAAA	test
RP11-864G5.7_chr11+:102306220	RP11-864G5.7	CAACAGAAGTTGGAAGAGAA	test
RP11-864G5.7_chr11-:102306377	RP11-864G5.7	ACTCCTCCCCCCTTTCCCCA	test
RP11-864G5.7_chr11+:102306392	RP11-864G5.7	GGGGAAAGGGGGGAGGAGTG	test
RP11-864G5.7_chr11-:102306234	RP11-864G5.7	GGACTCAGCCAACAGGGGGC	test
RP11-864G5.7_chr11+:102306237	RP11-864G5.7	GAATGGAACCTGCCCCCTGT	test
RP11-864G5.7_chr11+:102306417	RP11-864G5.7	AGGGAGTGGGAAGAGGTAGA	test
RP11-864G5.7_chr11-:102306378	RP11-864G5.7	CACTCCTCCCCCCTTTCCCC	test
RP11-864G5.7_chr11+:102306391	RP11-864G5.7	TGGGGAAAGGGGGGAGGAGT	test
RP11-864G5.7_chr11+:102306390	RP11-864G5.7	CTGGGGAAAGGGGGGAGGAG	test
RP11-864G5.7_chr11+:102306393	RP11-864G5.7	GGGAAAGGGGGGAGGAGTGG	test
RP11-864G5.7_chr11+:102306394	RP11-864G5.7	GGAAAGGGGGGAGGAGTGGG	test
CTB-35F21.5_chr5+:139775166	CTB-35F21.5	ACTTCGAAGGTTTGGAGACA	test
CTB-35F21.5_chr5+:139775257	CTB-35F21.5	TGGGGCACTGTCTCCGGGAG	test
CTB-35F21.5_chr5+:139775295	CTB-35F21.5	TACCTGGGAGGGCCGCGCGG	test
CTB-35F21.5_chr5+:139775293	CTB-35F21.5	AGTACCTGGGAGGGCCGCGC	test
CTB-35F21.5_chr5+:139775294	CTB-35F21.5	GTACCTGGGAGGGCCGCGCG	test
CTB-35F21.5_chr5+:139775182	CTB-35F21.5	GACAAGGCCTTGAGGCACTG	test
CTB-35F21.5_chr5+:139775262	CTB-35F21.5	CACTGTCTCCGGGAGTGGCG	test
CTB-35F21.5_chr5+:139775252	CTB-35F21.5	AGTGTTGGGGCACTGTCTCC	test
CTB-35F21.5_chr5+:139775260	CTB-35F21.5	GGCACTGTCTCCGGGAGTGG	test
CTB-35F21.5_chr5+:139775263	CTB-35F21.5	ACTGTCTCCGGGAGTGGCGG	test
CTB-35F21.5_chr5-:139775209	CTB-35F21.5	CCTGCTGCCTTGCAAAGATA	test
CTB-35F21.5_chr5+:139775292	CTB-35F21.5	CAGTACCTGGGAGGGCCGCG	test
CTB-35F21.5_chr5+:139775251	CTB-35F21.5	GAGTGTTGGGGCACTGTCTC	test
CTB-35F21.5_chr5+:139775238	CTB-35F21.5	GCAGGGGACGCAGGAGTGTT	test
CTB-35F21.5_chr5-:139775204	CTB-35F21.5	TGCCTTGCAAAGATAGGGTG	test
CTB-35F21.5_chr5+:139775261	CTB-35F21.5	GCACTGTCTCCGGGAGTGGC	test
CTB-35F21.5_chr5+:139775239	CTB-35F21.5	CAGGGGACGCAGGAGTGTTG	test
CTB-35F21.5_chr5+:139775280	CTB-35F21.5	CGGGGGCTGCTGCAGTACCT	test
CTB-35F21.5_chr5+:139775213	CTB-35F21.5	CTCCACACCCTATCTTTGCA	test
CTB-35F21.5_chr5+:139775221	CTB-35F21.5	CCTATCTTTGCAAGGCAGCA	test
CTB-35F21.5_chr5+:139775229	CTB-35F21.5	TGCAAGGCAGCAGGGGACGC	test
CTB-35F21.5_chr5+:139775237	CTB-35F21.5	AGCAGGGGACGCAGGAGTGT	test
CTB-35F21.5_chr5-:139775178	CTB-35F21.5	AATCTGACCTCAGTGCCTCA	test
CTC-246B18.10_chr19+:39341953	CTC-246B18.10	CCGAGTGCAGACGCCCACTG	test
CTC-246B18.10_chr19+:39341983	CTC-246B18.10	TGGGTGAGGCGGGCCACCCA	test
CTC-246B18.10_chr19+:39341984	CTC-246B18.10	GGGTGAGGCGGGCCACCCAA	test
CTC-246B18.10_chr19-:39341941	CTC-246B18.10	CTCAGTGGGCGTCTGCACTC	test
CTC-246B18.10_chr19-:39341934	CTC-246B18.10	GGCGTCTGCACTCGGGCTTC	test
CTC-246B18.10_chr19-:39341969	CTC-246B18.10	TGGGTGGCCCGCCTCACCCA	test
CTC-246B18.10_chr19-:39341942	CTC-246B18.10	CCTCAGTGGGCGTCTGCACT	test
CTC-246B18.10_chr19+:39341985	CTC-246B18.10	GGTGAGGCGGGCCACCCAAG	test
CTC-246B18.10_chr19-:39341933	CTC-246B18.10	GCGTCTGCACTCGGGCTTCT	test
CTC-246B18.10_chr19-:39341926	CTC-246B18.10	CACTCGGGCTTCTGGGCGCT	test
CTC-246B18.10_chr19+:39341964	CTC-246B18.10	CGCCCACTGAGGACAGCCTT	test
CTC-246B18.10_chr19-:39341955	CTC-246B18.10	CACCCAAGGCTGTCCTCAGT	test
CTC-246B18.10_chr19+:39342039	CTC-246B18.10	AGGAACTGTGACTTCGCTCG	test
CTC-246B18.10_chr19+:39342038	CTC-246B18.10	CAGGAACTGTGACTTCGCTC	test
CTC-246B18.10_chr19+:39342047	CTC-246B18.10	TGACTTCGCTCGGGGCAGCT	test
CTC-246B18.10_chr19+:39342048	CTC-246B18.10	GACTTCGCTCGGGGCAGCTG	test
CTC-246B18.10_chr19-:39342102	CTC-246B18.10	AACGGGCCCGGCGGAGTCTG	test
CTC-246B18.10_chr19+:39342046	CTC-246B18.10	GTGACTTCGCTCGGGGCAGC	test
CTC-246B18.10_chr19-:39342097	CTC-246B18.10	GCCCGGCGGAGTCTGAGGTT	test
CTC-246B18.10_chr19-:39342098	CTC-246B18.10	GGCCCGGCGGAGTCTGAGGT	test
CTC-246B18.10_chr19+:39342076	CTC-246B18.10	GCGCGCGAGCCTGCCCCCTG	test
CTC-246B18.10_chr19-:39342111	CTC-246B18.10	GCCCAGGGCAACGGGCCCGG	test
CTC-246B18.10_chr19-:39342114	CTC-246B18.10	GTTGCCCAGGGCAACGGGCC	test
CTC-246B18.10_chr19+:39342107	CTC-246B18.10	GCCCAACCTCAGACTCCGCC	test
RP11-295D4.7_chr16+:4433407	RP11-295D4.7	ATTTGTCATTGGTTCTCAGC	test
RP11-295D4.7_chr16+:4433479	RP11-295D4.7	GTTCTCTACTGGCATCTAGT	test
RP11-295D4.7_chr16+:4433519	RP11-295D4.7	TCTGGTGAATGTCTGGAGTA	test
RP11-295D4.7_chr16-:4433500	RP11-295D4.7	CAGACATTCACCAGAAACTC	test
RP11-295D4.7_chr16+:4433512	RP11-295D4.7	CTGAGTTTCTGGTGAATGTC	test
RP11-295D4.7_chr16+:4433409	RP11-295D4.7	TTGTCATTGGTTCTCAGCAG	test
RP11-295D4.7_chr16+:4433501	RP11-295D4.7	GTGGAGACCTCCTGAGTTTC	test
RP11-295D4.7_chr16+:4433518	RP11-295D4.7	TTCTGGTGAATGTCTGGAGT	test
RP11-295D4.7_chr16-:4433497	RP11-295D4.7	ACATTCACCAGAAACTCAGG	test
RP11-295D4.7_chr16+:4433408	RP11-295D4.7	TTTGTCATTGGTTCTCAGCA	test
RP11-295D4.7_chr16+:4433453	RP11-295D4.7	CATTTGGCAATGCCTGGAGA	test
RP11-295D4.7_chr16+:4433437	RP11-295D4.7	TTTACTTCCCAGGGGACATT	test
RP11-295D4.7_chr16+:4433478	RP11-295D4.7	AGTTCTCTACTGGCATCTAG	test
RP11-295D4.7_chr16+:4433447	RP11-295D4.7	AGGGGACATTTGGCAATGCC	test
RP11-295D4.7_chr16+:4433482	RP11-295D4.7	CTCTACTGGCATCTAGTGGG	test
RP11-295D4.7_chr16-:4433434	RP11-295D4.7	AGGCATTGCCAAATGTCCCC	test
RP11-295D4.7_chr16-:4433433	RP11-295D4.7	GGCATTGCCAAATGTCCCCT	test
RP1-300I2.3_chr20-:45229760	RP1-300I2.3	TGTCTATGTCAGCTCTAGCG	test
RP1-300I2.3_chr20+:45229773	RP1-300I2.3	CCGCTAGAGCTGACATAGAC	test
RP1-300I2.3_chr20-:45229793	RP1-300I2.3	GAAAAGGGATTGGGCGCACC	test
RP1-300I2.3_chr20-:45229747	RP1-300I2.3	TCTAGCGGGGCCCCACCAGC	test
RP1-300I2.3_chr20+:45229699	RP1-300I2.3	GGTGCTTCCGGGTCAAGTTG	test
RP1-300I2.3_chr20-:45229761	RP1-300I2.3	CTGTCTATGTCAGCTCTAGC	test
RP1-300I2.3_chr20-:45229790	RP1-300I2.3	AAGGGATTGGGCGCACCTGG	test
RP1-300I2.3_chr20-:45229762	RP1-300I2.3	CCTGTCTATGTCAGCTCTAG	test
RP1-300I2.3_chr20+:45229687	RP1-300I2.3	AAGAAAACAGCTGGTGCTTC	test
RP1-300I2.3_chr20-:45229713	RP1-300I2.3	CTCCGGGGGCTGGAGATCAG	test
RP1-300I2.3_chr20-:45229786	RP1-300I2.3	GATTGGGCGCACCTGGAGGC	test
RP1-300I2.3_chr20-:45229728	RP1-300I2.3	CAGGTGGTGCTGTGGCTCCG	test
RP1-300I2.3_chr20-:45229809	RP1-300I2.3	TAGCTTCATAATGCAAGAAA	test
RP1-300I2.3_chr20-:45229744	RP1-300I2.3	AGCGGGGCCCCACCAGCAGG	test
RP1-300I2.3_chr20-:45229730	RP1-300I2.3	AGCAGGTGGTGCTGTGGCTC	test
RP1-300I2.3_chr20-:45229803	RP1-300I2.3	CATAATGCAAGAAAAGGGAT	test
RP1-300I2.3_chr20-:45229727	RP1-300I2.3	AGGTGGTGCTGTGGCTCCGG	test
RP1-300I2.3_chr20-:45229802	RP1-300I2.3	ATAATGCAAGAAAAGGGATT	test
RP1-300I2.3_chr20+:45229678	RP1-300I2.3	TGGAAGTGAAAGAAAACAGC	test
RP1-300I2.3_chr20-:45229723	RP1-300I2.3	GGTGCTGTGGCTCCGGGGGC	test
RP1-300I2.3_chr20-:45229736	RP1-300I2.3	CCCACCAGCAGGTGGTGCTG	test
RP1-300I2.3_chr20-:45229729	RP1-300I2.3	GCAGGTGGTGCTGTGGCTCC	test
RP1-300I2.3_chr20+:45229743	RP1-300I2.3	GGAGCCACAGCACCACCTGC	test
RP1-300I2.3_chr20+:45229930	RP1-300I2.3	GTGGCGACGCGTACTGTGGC	test
RP1-300I2.3_chr20-:45229969	RP1-300I2.3	ATGAGGGCCAGGTCGTCGCA	test
RP1-300I2.3_chr20+:45229973	RP1-300I2.3	GAGGAGTCCATGCGACGACC	test
RP1-300I2.3_chr20+:45229926	RP1-300I2.3	GGGCGTGGCGACGCGTACTG	test
RP1-300I2.3_chr20+:45229906	RP1-300I2.3	GCCCTGAAAAGTGGCGGGTA	test
RP1-300I2.3_chr20+:45229936	RP1-300I2.3	ACGCGTACTGTGGCTGGAGT	test
RP1-300I2.3_chr20-:45229957	RP1-300I2.3	TCGTCGCATGGACTCCTCAG	test
RP1-300I2.3_chr20+:45229937	RP1-300I2.3	CGCGTACTGTGGCTGGAGTT	test
RP1-300I2.3_chr20+:45229954	RP1-300I2.3	GTTGGGGAGCATTTCCTCTG	test
RP1-300I2.3_chr20+:45229938	RP1-300I2.3	GCGTACTGTGGCTGGAGTTG	test
RP1-300I2.3_chr20+:45229900	RP1-300I2.3	CCTGGAGCCCTGAAAAGTGG	test
RP1-300I2.3_chr20+:45229911	RP1-300I2.3	GAAAAGTGGCGGGTAGGGCG	test
UBA52P8_chr16-:48334457	UBA52P8	TAAGGCTATTCCTTCCCCAA	test
UBA52P8_chr16+:48334544	UBA52P8	AGTTGACTGCATGGGGGCGC	test
UBA52P8_chr16-:48334475	UBA52P8	CCCAAAAAGAAGGTCGAATA	test
UBA52P8_chr16+:48334562	UBA52P8	GCAGGCGAGCACAGCTCTTG	test
UBA52P8_chr16+:48334536	UBA52P8	CTTGCAGCAGTTGACTGCAT	test
UBA52P8_chr16+:48334537	UBA52P8	TTGCAGCAGTTGACTGCATG	test
UBA52P8_chr16+:48334538	UBA52P8	TGCAGCAGTTGACTGCATGG	test
UBA52P8_chr16-:48334456	UBA52P8	AAGGCTATTCCTTCCCCAAA	test
UBA52P8_chr16+:48334505	UBA52P8	TGGGACGCAGGTTGTTGGTG	test
UBA52P8_chr16+:48334592	UBA52P8	TCTTCTTGCAGTTGTATTTC	test
UBA52P8_chr16+:48334593	UBA52P8	CTTCTTGCAGTTGTATTTCT	test
UBA52P8_chr16-:48334485	UBA52P8	CAACCTGCGTCCCAAAAAGA	test
UBA52P8_chr16+:48334458	UBA52P8	AGGAGGCTGCCCTTTGGGGA	test
UBA52P8_chr16+:48334454	UBA52P8	GGGCAGGAGGCTGCCCTTTG	test
UBA52P8_chr16+:48334535	UBA52P8	TCTTGCAGCAGTTGACTGCA	test
UBA52P8_chr16+:48334453	UBA52P8	TGGGCAGGAGGCTGCCCTTT	test
UBA52P8_chr16-:48334517	UBA52P8	GTCAACTGCTGCAAGAAGTG	test
UBA52P8_chr16+:48334452	UBA52P8	CTGGGCAGGAGGCTGCCCTT	test
UBA52P8_chr16-:48334703	UBA52P8	GAGGGCAAACAGCTGAAGGA	test
UBA52P8_chr16-:48334707	UBA52P8	ATTTGAGGGCAAACAGCTGA	test
UBA52P8_chr16+:48334691	UBA52P8	TGTTGTAGTCTAAGAGTGTG	test
UBA52P8_chr16-:48334721	UBA52P8	CAGCAGTGTCTGATATTTGA	test
UBA52P8_chr16+:48334733	UBA52P8	CCTCAAATATCAGACACTGC	test
UBA52P8_chr16+:48334738	UBA52P8	AATATCAGACACTGCTGGTC	test
UBA52P8_chr16-:48334722	UBA52P8	CCAGCAGTGTCTGATATTTG	test
UBA52P8_chr16+:48334667	UBA52P8	GGCGCAGGGTGGACTCTTTC	test
RP11-230C9.1_chr6-:156662130	RP11-230C9.1	TAGAGGGCGCACTCTGCGAG	test
RP11-230C9.1_chr6-:156662170	RP11-230C9.1	GTACCGGACCTGGGACGATG	test
RP11-230C9.1_chr6-:156662180	RP11-230C9.1	GAGTGCCACAGTACCGGACC	test
RP11-230C9.1_chr6-:156662179	RP11-230C9.1	AGTGCCACAGTACCGGACCT	test
RP11-230C9.1_chr6+:156662195	RP11-230C9.1	GTCCGGTACTGTGGCACTCC	test
RP11-230C9.1_chr6+:156662099	RP11-230C9.1	GCCACCGATGTAAAGCGCCC	test
RP11-230C9.1_chr6+:156662194	RP11-230C9.1	GGTCCGGTACTGTGGCACTC	test
RP11-230C9.1_chr6-:156662089	RP11-230C9.1	TCCTGGGCGCTTTACATCGG	test
RP11-230C9.1_chr6+:156662145	RP11-230C9.1	TCGCAGAGTGCGCCCTCTAC	test
RP11-230C9.1_chr6-:156662080	RP11-230C9.1	CTTTACATCGGTGGCCTTGT	test
RP11-230C9.1_chr6+:156662186	RP11-230C9.1	TCGTCCCAGGTCCGGTACTG	test
RP11-230C9.1_chr6+:156662178	RP11-230C9.1	GAACCTCATCGTCCCAGGTC	test
RP11-230C9.1_chr6+:156662156	RP11-230C9.1	GCCCTCTACCGGAGGGGTGA	test
RP11-230C9.1_chr6-:156662081	RP11-230C9.1	GCTTTACATCGGTGGCCTTG	test
RP11-230C9.1_chr6+:156662077	RP11-230C9.1	CACAAAGCGGACTGCCCACA	test
RP11-230C9.1_chr6-:156662202	RP11-230C9.1	TCAGATGACGTCTGATTTCC	test
RP11-230C9.1_chr6-:156662092	RP11-230C9.1	GCTTCCTGGGCGCTTTACAT	test
RP11-230C9.1_chr6+:156662173	RP11-230C9.1	TGAAGGAACCTCATCGTCCC	test
RP11-230C9.1_chr6-:156662186	RP11-230C9.1	TTCCCGGAGTGCCACAGTAC	test
RP11-230C9.1_chr6-:156662153	RP11-230C9.1	ATGAGGTTCCTTCACCCCTC	test
RP11-230C9.1_chr6-:156662105	RP11-230C9.1	TTTGCAGCCAGTGGCTTCCT	test
RP11-230C9.1_chr6+:156662109	RP11-230C9.1	TAAAGCGCCCAGGAAGCCAC	test
RP11-230C9.1_chr6+:156662148	RP11-230C9.1	CAGAGTGCGCCCTCTACCGG	test
RP11-230C9.1_chr6+:156662315	RP11-230C9.1	CGCTTCCAGACCGCAACTAT	test
RP11-230C9.1_chr6-:156662314	RP11-230C9.1	CTGCAAAGCACCAATAGTTG	test
RP11-230C9.1_chr6-:156662309	RP11-230C9.1	AAGCACCAATAGTTGCGGTC	test
RP11-230C9.1_chr6-:156662350	RP11-230C9.1	ACAAGTTAATGTCTTCAGCA	test
RP11-230C9.1_chr6+:156662326	RP11-230C9.1	CGCAACTATTGGTGCTTTGC	test
RP11-110I1.14_chr11+:119065598	RP11-110I1.14	AGACGTGGAGCTTCTGCCAT	test
RP11-110I1.14_chr11+:119065533	RP11-110I1.14	TTGTAACCCTCATCAATAAG	test
RP11-110I1.14_chr11+:119065542	RP11-110I1.14	TCATCAATAAGAGGATCCAA	test
RP11-110I1.14_chr11-:119065603	RP11-110I1.14	GTGCTCCCCCTGTTGTCCAA	test
RP11-110I1.14_chr11-:119065547	RP11-110I1.14	CTGGTTCTACTTGTGCCCAT	test
RP11-110I1.14_chr11-:119065626	RP11-110I1.14	TAGAGTGCATCTTTGTTGCT	test
RP11-110I1.14_chr11+:119065606	RP11-110I1.14	AGCTTCTGCCATTGGACAAC	test
RP11-110I1.14_chr11+:119065574	RP11-110I1.14	GAACCAGATTCAGCCCTCAG	test
RP11-110I1.14_chr11+:119065608	RP11-110I1.14	CTTCTGCCATTGGACAACAG	test
RP11-110I1.14_chr11-:119065576	RP11-110I1.14	AGCTCCACGTCTTCCTCTGA	test
RP11-110I1.14_chr11+:119065543	RP11-110I1.14	CATCAATAAGAGGATCCAAT	test
RP11-110I1.14_chr11-:119065625	RP11-110I1.14	AGAGTGCATCTTTGTTGCTT	test
RP11-110I1.14_chr11+:119065583	RP11-110I1.14	TCAGCCCTCAGAGGAAGACG	test
RP11-110I1.14_chr11+:119065609	RP11-110I1.14	TTCTGCCATTGGACAACAGG	test
RP11-110I1.14_chr11+:119065607	RP11-110I1.14	GCTTCTGCCATTGGACAACA	test
RP11-110I1.14_chr11-:119065577	RP11-110I1.14	AAGCTCCACGTCTTCCTCTG	test
RP11-110I1.14_chr11-:119065566	RP11-110I1.14	CTTCCTCTGAGGGCTGAATC	test
RP11-110I1.14_chr11-:119065529	RP11-110I1.14	ATTGGATCCTCTTATTGATG	test
RP11-110I1.14_chr11-:119065779	RP11-110I1.14	AGCAATGTGGCCAGGCAAGC	test
RP11-110I1.14_chr11-:119065787	RP11-110I1.14	TTAAAAGAAGCAATGTGGCC	test
RP11-110I1.14_chr11-:119065792	RP11-110I1.14	ATATGTTAAAAGAAGCAATG	test
GS1-388B5.2_chr3-:125679454	GS1-388B5.2	CTCACTGAGAAGCCAAAAGG	test
GS1-388B5.2_chr3-:125679392	GS1-388B5.2	GAAAGAGAGAAAGGACCTTC	test
GS1-388B5.2_chr3-:125679354	GS1-388B5.2	GGTCCATGGGCATTATCCCT	test
GS1-388B5.2_chr3+:125679375	GS1-388B5.2	ATGCCCATGGACCTTGTTAA	test
GS1-388B5.2_chr3+:125679337	GS1-388B5.2	GCCAATCTCCAACACCTTGC	test
GS1-388B5.2_chr3+:125679453	GS1-388B5.2	CTTCTAGACTTCCCTCCTTT	test
GS1-388B5.2_chr3-:125679367	GS1-388B5.2	TATCCTTTAACAAGGTCCAT	test
GS1-388B5.2_chr3+:125679362	GS1-388B5.2	AGCCCAAGGGATAATGCCCA	test
GS1-388B5.2_chr3-:125679368	GS1-388B5.2	CTATCCTTTAACAAGGTCCA	test
GS1-388B5.2_chr3+:125679388	GS1-388B5.2	TTGTTAAAGGATAGTCCTGA	test
GS1-388B5.2_chr3-:125679375	GS1-388B5.2	TTCAGGACTATCCTTTAACA	test
GS1-388B5.2_chr3-:125679327	GS1-388B5.2	TCCTGCAAGGTGTTGGAGAT	test
GS1-388B5.2_chr3-:125679323	GS1-388B5.2	GCAAGGTGTTGGAGATTGGC	test
GS1-388B5.2_chr3-:125679457	GS1-388B5.2	CTGCTCACTGAGAAGCCAAA	test
GS1-388B5.2_chr3-:125679340	GS1-388B5.2	ATCCCTTGGGCTTTCCTGCA	test
GS1-388B5.2_chr3-:125679334	GS1-388B5.2	TGGGCTTTCCTGCAAGGTGT	test
GS1-388B5.2_chr3+:125679348	GS1-388B5.2	ACACCTTGCAGGAAAGCCCA	test
GS1-388B5.2_chr3+:125679349	GS1-388B5.2	CACCTTGCAGGAAAGCCCAA	test
GS1-388B5.2_chr3-:125679419	GS1-388B5.2	TAACAGAGAGCTCCACCAGC	test
GS1-388B5.2_chr3-:125679414	GS1-388B5.2	GAGAGCTCCACCAGCAGGTG	test
GS1-388B5.2_chr3-:125679415	GS1-388B5.2	AGAGAGCTCCACCAGCAGGT	test
GS1-388B5.2_chr3+:125679418	GS1-388B5.2	TCTCTTTCCCCACCTGCTGG	test
RP1-20I3.3_chrX-:130330841	RP1-20I3.3	GCACGCCACTGACAGCTCCT	test
RP1-20I3.3_chrX-:130330821	RP1-20I3.3	CGGGCATCAGAGACCTCTAG	test
RP1-20I3.3_chrX+:130330847	RP1-20I3.3	GATGCCCGAGGAGCTGTCAG	test
RP1-20I3.3_chrX+:130330855	RP1-20I3.3	AGGAGCTGTCAGTGGCGTGC	test
RP1-20I3.3_chrX+:130330835	RP1-20I3.3	CTAGAGGTCTCTGATGCCCG	test
RP1-20I3.3_chrX-:130330840	RP1-20I3.3	CACGCCACTGACAGCTCCTC	test
RP1-20I3.3_chrX+:130330809	RP1-20I3.3	TGTTGGCAGAGCAGAGCGGC	test
RP1-20I3.3_chrX+:130330867	RP1-20I3.3	TGGCGTGCTGGAGAGAGCAA	test
RP1-20I3.3_chrX+:130330866	RP1-20I3.3	GTGGCGTGCTGGAGAGAGCA	test
RP1-20I3.3_chrX+:130330805	RP1-20I3.3	TCTTTGTTGGCAGAGCAGAG	test
RP1-20I3.3_chrX+:130330792	RP1-20I3.3	GTGTGTGTTTAAATCTTTGT	test
RP1-20I3.3_chrX+:130330819	RP1-20I3.3	GCAGAGCGGCTGGCCGCTAG	test
RP1-20I3.3_chrX+:130330887	RP1-20I3.3	GGGATCACTAACACCTGAGA	test
H3F3AP5_chrX-:50905466	H3F3AP5	TATACCACCGGTAGATTTGC	test
H3F3AP5_chrX+:50905470	H3F3AP5	TGGACTGCCCGCAAATCTAC	test
H3F3AP5_chrX-:50905467	H3F3AP5	CTATACCACCGGTAGATTTG	test
H3F3AP5_chrX+:50905450	H3F3AP5	ATACCATGGCTCGTACAAGG	test
H3F3AP5_chrX+:50905486	H3F3AP5	CTACCGGTGGTATAGCACCC	test
H3F3AP5_chrX-:50905517	H3F3AP5	AGAGGGCGCACTCTTACAAG	test
H3F3AP5_chrX+:50905447	H3F3AP5	TCTATACCATGGCTCGTACA	test
H3F3AP5_chrX-:50905478	H3F3AP5	CTTCCTGGGTGCTATACCAC	test
H3F3AP5_chrX-:50905590	H3F3AP5	TCTGATAATGTCTAATTTCA	test
H3F3AP5_chrX+:50905473	H3F3AP5	ACTGCCCGCAAATCTACCGG	test
H3F3AP5_chrX-:50905558	H3F3AP5	GTACCAGGTCTGTAACGATG	test
H3F3AP5_chrX+:50905566	H3F3AP5	AAACCTCATCGTTACAGACC	test
H3F3AP5_chrX+:50905574	H3F3AP5	TCGTTACAGACCTGGTACTG	test
H3F3AP5_chrX+:50905496	H3F3AP5	TATAGCACCCAGGAAGCAAC	test
H3F3AP5_chrX+:50905533	H3F3AP5	TGTAAGAGTGCGCCCTCTAC	test
H3F3AP5_chrX+:50905693	H3F3AP5	AAACAGATCTGCGCTTCCAG	test
H3F3AP5_chrX-:50905698	H3F3AP5	AAGTACCGATAGCTGCCCTC	test
H3F3AP5_chrX+:50905715	H3F3AP5	GGCAGCTATCGGTACTTTGC	test
H3F3AP5_chrX-:50905739	H3F3AP5	TTCAAAAAGGCCAACTAGAT	test
H3F3AP5_chrX+:50905718	H3F3AP5	AGCTATCGGTACTTTGCAGG	test
H3F3AP5_chrX+:50905704	H3F3AP5	CGCTTCCAGAGGGCAGCTAT	test
H3F3AP5_chrX+:50905740	H3F3AP5	GCAAGTGAGGCCTATCTAGT	test
H3F3AP5_chrX+:50905694	H3F3AP5	AACAGATCTGCGCTTCCAGA	test
H3F3AP5_chrX+:50905727	H3F3AP5	TACTTTGCAGGAGGCAAGTG	test
SNRPGP5_chr10-:13104888	SNRPGP5	CGACTCGCCTCCCGGTCCTG	test
SNRPGP5_chr10-:13104896	SNRPGP5	TTTCTGGCCGACTCGCCTCC	test
SNRPGP5_chr10-:13104883	SNRPGP5	CGCCTCCCGGTCCTGCGGTC	test
SNRPGP5_chr10+:13104779	SNRPGP5	ATAAATCCCTTCTAGCCATC	test
SNRPGP5_chr10+:13104892	SNRPGP5	GGCCCGACCGCAGGACCGGG	test
SNRPGP5_chr10+:13104848	SNRPGP5	AGATCTTCAAGGAACGAAGA	test
SNRPGP5_chr10+:13104888	SNRPGP5	CAGGGGCCCGACCGCAGGAC	test
SNRPGP5_chr10-:13104783	SNRPGP5	AGCATCATGTTCTAACCAGA	test
SNRPGP5_chr10+:13104837	SNRPGP5	GGTGGCATTCGAGATCTTCA	test
SNRPGP5_chr10+:13104849	SNRPGP5	GATCTTCAAGGAACGAAGAA	test
SNRPGP5_chr10-:13104876	SNRPGP5	CGGTCCTGCGGTCGGGCCCC	test
SNRPGP5_chr10+:13104889	SNRPGP5	AGGGGCCCGACCGCAGGACC	test
SNRPGP5_chr10-:13104775	SNRPGP5	GTTCTAACCAGATGGCTAGA	test
SNRPGP5_chr10-:13104774	SNRPGP5	TTCTAACCAGATGGCTAGAA	test
SNRPGP5_chr10-:13104766	SNRPGP5	AGATGGCTAGAAGGGATTTA	test
SNRPGP5_chr10+:13104871	SNRPGP5	GACAGCATGGGGGTGACCAG	test
SNRPGP5_chr10+:13104859	SNRPGP5	GAACGAAGAAGGGACAGCAT	test
SNRPGP5_chr10-:13104884	SNRPGP5	TCGCCTCCCGGTCCTGCGGT	test
SNRPGP5_chr10+:13104869	SNRPGP5	GGGACAGCATGGGGGTGACC	test
SNRPGP5_chr10+:13104861	SNRPGP5	ACGAAGAAGGGACAGCATGG	test
SNRPGP5_chr10+:13104860	SNRPGP5	AACGAAGAAGGGACAGCATG	test
SNRPGP5_chr10+:13104858	SNRPGP5	GGAACGAAGAAGGGACAGCA	test
SNRPGP5_chr10+:13104870	SNRPGP5	GGACAGCATGGGGGTGACCA	test
TUBB3P2_chr7+:134735045	TUBB3P2	ATGCCCTCATGTACCAATGC	test
TUBB3P2_chr7-:134735154	TUBB3P2	TATCCAGATACAAAGAGTCT	test
TUBB3P2_chr7-:134735038	TUBB3P2	TCTTCCTGCATTGGTACATG	test
TUBB3P2_chr7-:134735047	TUBB3P2	GACACAAGGTCTTCCTGCAT	test
TUBB3P2_chr7-:134735037	TUBB3P2	CTTCCTGCATTGGTACATGA	test
TUBB3P2_chr7-:134735091	TUBB3P2	CATCAGCAACACAACCATTC	test
TUBB3P2_chr7-:134735086	TUBB3P2	GCAACACAACCATTCAGGAG	test
TUBB3P2_chr7+:134735122	TUBB3P2	ATGAAGGTGGCGCTGTTCTC	test
TUBB3P2_chr7+:134735088	TUBB3P2	GGCAGAGAACCACTCCTGAA	test
TUBB3P2_chr7-:134735150	TUBB3P2	CAGATACAAAGAGTCTTGGA	test
TUBB3P2_chr7+:134735162	TUBB3P2	CATCCAAGACTCTTTGTATC	test
TUBB3P2_chr7+:134735175	TUBB3P2	TTGTATCTGGATATGAAAAC	test
TUBB3P2_chr7+:134735106	TUBB3P2	AATGGTTGTGTTGCTGATGA	test
TUBB3P2_chr7-:134735032	TUBB3P2	TGCATTGGTACATGAGGGCA	test
TUBB3P2_chr7+:134735109	TUBB3P2	GGTTGTGTTGCTGATGAAGG	test
TUBB3P2_chr7+:134735067	TUBB3P2	GAAGACCTTGTGTCTGAAAA	test
RP11-401F2.2_chr17-:67276249	RP11-401F2.2	CCACCTGCTAGACGACGACG	test
RP11-401F2.2_chr17+:67276323	RP11-401F2.2	TTAGCAAGGACCCGTTCTCC	test
RP11-401F2.2_chr17+:67276267	RP11-401F2.2	GTCGTCTAGCAGGTGGCGAT	test
RP11-401F2.2_chr17+:67276257	RP11-401F2.2	AGTCCTCGTCGTCGTCTAGC	test
RP11-401F2.2_chr17-:67276303	RP11-401F2.2	CGGGTCCTTGCTAAACATCA	test
RP11-401F2.2_chr17+:67276270	RP11-401F2.2	GTCTAGCAGGTGGCGATAGG	test
RP11-401F2.2_chr17+:67276260	RP11-401F2.2	CCTCGTCGTCGTCTAGCAGG	test
RP11-401F2.2_chr17-:67276322	RP11-401F2.2	AGCGCCAGGACCAGGAGAAC	test
RP11-401F2.2_chr17+:67276329	RP11-401F2.2	AGGACCCGTTCTCCTGGTCC	test
RP11-401F2.2_chr17+:67276192	RP11-401F2.2	GGGGGTGGTGGTCTTATGGA	test
RP11-401F2.2_chr17-:67276294	RP11-401F2.2	GCTAAACATCAAGGTCAATC	test
RP11-401F2.2_chr17+:67276309	RP11-401F2.2	ATTGACCTTGATGTTTAGCA	test
RP11-401F2.2_chr17-:67276225	RP11-401F2.2	CTTCAATCTTTGTGATGCCC	test
RP11-401F2.2_chr17+:67276201	RP11-401F2.2	GGTCTTATGGATGGTTTGCA	test
RP11-401F2.2_chr17-:67276291	RP11-401F2.2	AAACATCAAGGTCAATCAGG	test
RP11-401F2.2_chr17-:67276323	RP11-401F2.2	CAGCGCCAGGACCAGGAGAA	test
RP11-401F2.2_chr17+:67276188	RP11-401F2.2	TCTGGGGGGTGGTGGTCTTA	test
RP11-401F2.2_chr17-:67276330	RP11-401F2.2	AGAGGGGCAGCGCCAGGACC	test
RP11-401F2.2_chr17-:67276336	RP11-401F2.2	CCAGGCAGAGGGGCAGCGCC	test
OR10AE3P_chr12+:55646555	OR10AE3P	CAGGGCGAGGACGACGATCA	test
OR10AE3P_chr12+:55646554	OR10AE3P	CCAGGGCGAGGACGACGATC	test
OR10AE3P_chr12-:55646484	OR10AE3P	GCACCACTTCTCCTTAGGGG	test
OR10AE3P_chr12-:55646543	OR10AE3P	CCTGATCGTCGTCCTCGCCC	test
OR10AE3P_chr12+:55646484	OR10AE3P	GTGGCGTGGGACCTCCCCTA	test
OR10AE3P_chr12+:55646522	OR10AE3P	GGAAGTGCGTGGGCCAGCGC	test
OR10AE3P_chr12+:55646498	OR10AE3P	CCCCTAAGGAGAAGTGGTGC	test
OR10AE3P_chr12-:55646524	OR10AE3P	CTGGCAGCCTCTGCCTGCGC	test
OR10AE3P_chr12-:55646487	OR10AE3P	CCTGCACCACTTCTCCTTAG	test
OR10AE3P_chr12+:55646528	OR10AE3P	GCGTGGGCCAGCGCAGGCAG	test
OR10AE3P_chr12-:55646489	OR10AE3P	CTCCTGCACCACTTCTCCTT	test
OR10AE3P_chr12+:55646492	OR10AE3P	GGACCTCCCCTAAGGAGAAG	test
OR10AE3P_chr12-:55646352	OR10AE3P	ATCGCCGAATGCGCTTGCGC	test
OR10AE3P_chr12+:55646370	OR10AE3P	AAGCGCATTCGGCGATGCCA	test
OR10AE3P_chr12+:55646280	OR10AE3P	GAAGCGGGCTCGGAAGACTA	test
OR10AE3P_chr12+:55646359	OR10AE3P	TGGCCCTGCGCAAGCGCATT	test
OR10AE3P_chr12+:55646369	OR10AE3P	CAAGCGCATTCGGCGATGCC	test
OR10AE3P_chr12+:55646279	OR10AE3P	CGAAGCGGGCTCGGAAGACT	test
OR10AE3P_chr12-:55646394	OR10AE3P	GTAGGCGGCTTCCCGCTGCT	test
OR10AE3P_chr12-:55646395	OR10AE3P	GGTAGGCGGCTTCCCGCTGC	test
OR10AE3P_chr12+:55646244	OR10AE3P	GGGTGGTGCTGCGCCGCAGA	test
OR10AE3P_chr12+:55646333	OR10AE3P	AGATGGCGTCACAGCGGCGG	test
OR10AE3P_chr12+:55646373	OR10AE3P	CGCATTCGGCGATGCCAGGG	test
OR10AE3P_chr12-:55646351	OR10AE3P	TCGCCGAATGCGCTTGCGCA	test
OR10AE3P_chr12-:55646345	OR10AE3P	AATGCGCTTGCGCAGGGCCA	test
OR10AE3P_chr12+:55646309	OR10AE3P	AGGTAGTAGAATGCAGCGGC	test
OR10AE3P_chr12-:55646317	OR10AE3P	GCCGCTGTGACGCCATCTGC	test
OR10AE3P_chr12+:55646289	OR10AE3P	TCGGAAGACTAGGGCTCCTC	test
OR10AE3P_chr12+:55646327	OR10AE3P	GCCGGCAGATGGCGTCACAG	test
OR10AE3P_chr12-:55646376	OR10AE3P	CTGGGTTTCTTCGCCCTCCC	test
OR10AE3P_chr12+:55646330	OR10AE3P	GGCAGATGGCGTCACAGCGG	test
OR10AE3P_chr12+:55646245	OR10AE3P	GGTGGTGCTGCGCCGCAGAA	test
OR10AE3P_chr12+:55646374	OR10AE3P	GCATTCGGCGATGCCAGGGA	test
OR10AE3P_chr12-:55646294	OR10AE3P	CCGCTGCATTCTACTACCTG	test
OR10AE3P_chr12+:55646250	OR10AE3P	TGCTGCGCCGCAGAAGGGCA	test
RP11-293K19.1_chr1+:62530723	RP11-293K19.1	GCCCGTGAGGTGGCACCAAT	test
RP11-293K19.1_chr1-:62530695	RP11-293K19.1	ACGGGCAAAGCACCAAGTGC	test
RP11-293K19.1_chr1+:62530713	RP11-293K19.1	TTGGTGCTTTGCCCGTGAGG	test
RP11-293K19.1_chr1+:62530722	RP11-293K19.1	TGCCCGTGAGGTGGCACCAA	test
RP11-293K19.1_chr1+:62530781	RP11-293K19.1	CGACAAGATGATCTGCCTCA	test
RP11-293K19.1_chr1-:62530681	RP11-293K19.1	AAGTGCAGGCAGACTCTTTC	test
RP11-293K19.1_chr1+:62530710	RP11-293K19.1	CACTTGGTGCTTTGCCCGTG	test
RP11-293K19.1_chr1-:62530727	RP11-293K19.1	CTGGTGCAGGCAAGGCCCAT	test
RP11-293K19.1_chr1-:62530659	RP11-293K19.1	GATGTTGTAGTCTGAGTGTG	test
RP11-293K19.1_chr1-:62530785	RP11-293K19.1	GCAGGTGAGCATAACCCTTG	test
RP11-293K19.1_chr1-:62530713	RP11-293K19.1	GCCCATTGGTGCCACCTCAC	test
RP11-293K19.1_chr1-:62530740	RP11-293K19.1	GTTTCTGAGCGAGCTGGTGC	test
RP11-293K19.1_chr1+:62530782	RP11-293K19.1	GACAAGATGATCTGCCTCAA	test
RP11-293K19.1_chr1+:62530694	RP11-293K19.1	AGAAAGAGTCTGCCTGCACT	test
RP11-293K19.1_chr1-:62530746	RP11-293K19.1	AGTTGTGTTTCTGAGCGAGC	test
RP11-293K19.1_chr1-:62530735	RP11-293K19.1	TGAGCGAGCTGGTGCAGGCA	test
RP11-293K19.1_chr1-:62530714	RP11-293K19.1	GGCCCATTGGTGCCACCTCA	test
RP11-293K19.1_chr1+:62530647	RP11-293K19.1	GAAAGCAAACAGCTGAGAGA	test
RPL18AP2_chr21+:46420787	RPL18AP2	GAGTTCCTGGTACACGCTGT	test
RPL18AP2_chr21+:46420655	RPL18AP2	GTGGAGCTCTGACCACCCGC	test
RPL18AP2_chr21-:46420852	RPL18AP2	TTGGGGAAATCATCTACTTC	test
RPL18AP2_chr21-:46420773	RPL18AP2	ACAGCGTGTACCAGGAACTC	test
RPL18AP2_chr21+:46420658	RPL18AP2	GAGCTCTGACCACCCGCTGG	test
RPL18AP2_chr21+:46420577	RPL18AP2	TTGGGCTCCGAGGTGAAGCA	test
RPL18AP2_chr21-:46420573	RPL18AP2	GCACAAACCATGCTTCACCT	test
RPL18AP2_chr21-:46420772	RPL18AP2	CAGCGTGTACCAGGAACTCT	test
RPL18AP2_chr21+:46420668	RPL18AP2	CACCCGCTGGCGGCACCTGC	test
RPL18AP2_chr21+:46420628	RPL18AP2	GACAATGGGGAATGTGGTCT	test
RPL18AP2_chr21-:46420610	RPL18AP2	CACATTCCCCATTGTCCCAC	test
RPL18AP2_chr21+:46420693	RPL18AP2	GTGATCTCCTCTGGATGGAG	test
RPL18AP2_chr21-:46420781	RPL18AP2	CGGCTCCCACAGCGTGTACC	test
RPL18AP2_chr21-:46420660	RPL18AP2	CAGCCAGCAGGTGCCGCCAG	test
RPL18AP2_chr21+:46420801	RPL18AP2	CGCTGTGGGAGCCGCAGCTC	test
RPL18AP2_chr21+:46420636	RPL18AP2	GGAATGTGGTCTTGGACTTG	test
RPL18AP2_chr21-:46420801	RPL18AP2	TGTTGCATCTGCCTGAGCTG	test
RPL18AP2_chr21+:46420786	RPL18AP2	AGAGTTCCTGGTACACGCTG	test
RPL18AP2_chr21+:46420729	RPL18AP2	GCTGGGCACCCATGTCTCGG	test
RPL18AP2_chr21+:46420567	RPL18AP2	AAGGAAGGTGTTGGGCTCCG	test
RPL18AP2_chr21+:46420694	RPL18AP2	TGATCTCCTCTGGATGGAGT	test
RPL18AP2_chr21+:46420596	RPL18AP2	ATGGTTTGTGCTGAAGGCAC	test
RPL18AP2_chr21+:46420774	RPL18AP2	CAGTCACATCCCAGAGTTCC	test
RPL18AP2_chr21+:46420684	RPL18AP2	CTGCTGGCTGTGATCTCCTC	test
RPL18AP2_chr21+:46420613	RPL18AP2	CACAGGGTCCAGTGGGACAA	test
RPL18AP2_chr21+:46420688	RPL18AP2	TGGCTGTGATCTCCTCTGGA	test
RPL18AP2_chr21+:46420615	RPL18AP2	CAGGGTCCAGTGGGACAATG	test
RPL18AP2_chr21+:46420614	RPL18AP2	ACAGGGTCCAGTGGGACAAT	test
RPL18AP2_chr21+:46420622	RPL18AP2	CAGTGGGACAATGGGGAATG	test
RPL18AP2_chr21-:46420757	RPL18AP2	ACTCTGGGATGTGACTGCTG	test
RPL18AP2_chr21+:46420699	RPL18AP2	TCCTCTGGATGGAGTGGGCT	test
RPL18AP2_chr21-:46420672	RPL18AP2	CAGAGGAGATCACAGCCAGC	test
RPL18AP2_chr21-:46420825	RPL18AP2	TGAGAAATCTCTGAGGGTGA	test
RPL18AP2_chr21+:46420712	RPL18AP2	GTGGGCTGGGGCATGGTGCT	test
RPL18AP2_chr21+:46420558	RPL18AP2	CTGCACCTGAAGGAAGGTGT	test
RPL18AP2_chr21+:46420698	RPL18AP2	CTCCTCTGGATGGAGTGGGC	test
RPL18AP2_chr21-:46420656	RPL18AP2	CAGCAGGTGCCGCCAGCGGG	test
RPL18AP2_chr21+:46420711	RPL18AP2	AGTGGGCTGGGGCATGGTGC	test
RPL18AP2_chr21-:46420831	RPL18AP2	GGTGTTTGAGAAATCTCTGA	test
RPL18AP2_chr21+:46420700	RPL18AP2	CCTCTGGATGGAGTGGGCTG	test
RPL18AP2_chr21+:46420559	RPL18AP2	TGCACCTGAAGGAAGGTGTT	test
RPL18AP2_chr21+:46420605	RPL18AP2	GCTGAAGGCACAGGGTCCAG	test
RPL18AP2_chr21-:46420689	RPL18AP2	CCCCAGCCCACTCCATCCAG	test
RPL18AP2_chr21-:46420832	RPL18AP2	AGGTGTTTGAGAAATCTCTG	test
RPL18AP2_chr21+:46420705	RPL18AP2	GGATGGAGTGGGCTGGGGCA	test
RPL18AP2_chr21-:46421259	RPL18AP2	CCCGTGTGGACAAAGCTCCC	test
RPL18AP2_chr21-:46421310	RPL18AP2	AGGGTGTTAGACTTCAAAAC	test
RPL18AP2_chr21-:46421258	RPL18AP2	CCGTGTGGACAAAGCTCCCT	test
RPL18AP2_chr21+:46421270	RPL18AP2	CCAGGGAGCTTTGTCCACAC	test
RPL18AP2_chr21+:46421272	RPL18AP2	AGGGAGCTTTGTCCACACGG	test
RPL18AP2_chr21+:46421221	RPL18AP2	GTGCCGGGGCATCATCCCCC	test
RPL18AP2_chr21+:46421271	RPL18AP2	CAGGGAGCTTTGTCCACACG	test
RPL18AP2_chr21-:46421235	RPL18AP2	GAGCGGAGGCTGCAGCACTT	test
RPL18AP2_chr21-:46421184	RPL18AP2	CTGCTGAGCAGAGGGCACAC	test
RPL18AP2_chr21-:46421227	RPL18AP2	GCTGCAGCACTTGGGCACCT	test
RPL18AP2_chr21-:46421228	RPL18AP2	GGCTGCAGCACTTGGGCACC	test
RPL18AP2_chr21-:46421257	RPL18AP2	CGTGTGGACAAAGCTCCCTG	test
RPL18AP2_chr21-:46421286	RPL18AP2	GGATGAGGATGCCAGCGAGA	test
RPL18AP2_chr21-:46421329	RPL18AP2	GAGGAGGCGCCCTGGAAAAA	test
RPL18AP2_chr21-:46421183	RPL18AP2	TGCTGAGCAGAGGGCACACT	test
RPL18AP2_chr21-:46421330	RPL18AP2	GGAGGAGGCGCCCTGGAAAA	test
RPL18AP2_chr21-:46421193	RPL18AP2	CGGCACAGCCTGCTGAGCAG	test
RPL18AP2_chr21-:46421307	RPL18AP2	GTGTTAGACTTCAAAACAGG	test
RPL18AP2_chr21-:46421301	RPL18AP2	GACTTCAAAACAGGAGGATG	test
RPL18AP2_chr21+:46421196	RPL18AP2	CAGTGTGCCCTCTGCTCAGC	test
RPL18AP2_chr21-:46421226	RPL18AP2	CTGCAGCACTTGGGCACCTG	test
RPL18AP2_chr21-:46421182	RPL18AP2	GCTGAGCAGAGGGCACACTG	test
AC115115.4_chr2+:112345855	AC115115.4	TGCGCAGCAATCTTGCTAAA	test
AC115115.4_chr2-:112345828	AC115115.4	CTGCGCAGCTGCGCTCTGCC	test
AC115115.4_chr2+:112345821	AC115115.4	ACCACAGAGCAGGGCATCCC	test
AC115115.4_chr2+:112345863	AC115115.4	AATCTTGCTAAATGGAGCAG	test
AC115115.4_chr2+:112345866	AC115115.4	CTTGCTAAATGGAGCAGAGG	test
AC115115.4_chr2+:112345820	AC115115.4	GACCACAGAGCAGGGCATCC	test
AC115115.4_chr2-:112345827	AC115115.4	TGCGCAGCTGCGCTCTGCCC	test
AC115115.4_chr2-:112345811	AC115115.4	GCCCGGGATGCCCTGCTCTG	test
AC115115.4_chr2+:112345811	AC115115.4	TCCATTCTTGACCACAGAGC	test
AC115115.4_chr2-:112345801	AC115115.4	CCCTGCTCTGTGGTCAAGAA	test
AC115115.4_chr2+:112345812	AC115115.4	CCATTCTTGACCACAGAGCA	test
AC115115.4_chr2-:112345792	AC115115.4	GTGGTCAAGAATGGAACTAC	test
AC115115.4_chr2+:112346040	AC115115.4	AAGGAAAGGTCCAAGCTAGT	test
AC115115.4_chr2+:112346009	AC115115.4	TTTGAGCTGCCTTCCCATGC	test
AC115115.4_chr2+:112346039	AC115115.4	GAAGGAAAGGTCCAAGCTAG	test
AC115115.4_chr2+:112346021	AC115115.4	TCCCATGCAGGATAAAGAGA	test
AC115115.4_chr2-:112346007	AC115115.4	TCTCTTTATCCTGCATGGGA	test
AC115115.4_chr2-:112346011	AC115115.4	TCCTTCTCTTTATCCTGCAT	test
AC115115.4_chr2-:112346012	AC115115.4	TTCCTTCTCTTTATCCTGCA	test
AC115115.4_chr2+:112346026	AC115115.4	TGCAGGATAAAGAGAAGGAA	test
AC115115.4_chr2-:112346039	AC115115.4	GGCACCCCCTCCCACTAGCT	test
AC115115.4_chr2+:112346043	AC115115.4	GAAAGGTCCAAGCTAGTGGG	test
AC115115.4_chr2+:112346045	AC115115.4	AAGGTCCAAGCTAGTGGGAG	test
AC115115.4_chr2+:112346044	AC115115.4	AAAGGTCCAAGCTAGTGGGA	test
AC093106.5_chr7-:131753811	AC093106.5	GGAAACGCCACCTGCCGGAA	test
AC093106.5_chr7-:131753763	AC093106.5	GCATATTGTGACCAGACCCT	test
AC093106.5_chr7-:131753807	AC093106.5	ACGCCACCTGCCGGAAAGGA	test
AC093106.5_chr7+:131753763	AC093106.5	CACGGGCTGCTCCCAGGGTC	test
AC093106.5_chr7-:131753751	AC093106.5	CAGACCCTGGGAGCAGCCCG	test
AC093106.5_chr7-:131753835	AC093106.5	AAGAGAGGTTAAGCAGCTGC	test
AC093106.5_chr7+:131753757	AC093106.5	TCTCTCCACGGGCTGCTCCC	test
AC093106.5_chr7-:131753850	AC093106.5	GAGGGAAAGCTGGAAAAGAG	test
AC093106.5_chr7+:131753786	AC093106.5	TCACAATATGCCACCACAGT	test
AC093106.5_chr7+:131753787	AC093106.5	CACAATATGCCACCACAGTG	test
AC093106.5_chr7+:131753812	AC093106.5	AAATCACCTTCCTTTCCGGC	test
AC093106.5_chr7-:131753884	AC093106.5	ACTTTGCCAAGAGAAAACAG	test
AC093106.5_chr7-:131753816	AC093106.5	CAGGAGGAAACGCCACCTGC	test
AC093106.5_chr7+:131753815	AC093106.5	TCACCTTCCTTTCCGGCAGG	test
AC093106.5_chr7+:131753788	AC093106.5	ACAATATGCCACCACAGTGG	test
AC093106.5_chr7-:131753764	AC093106.5	GGCATATTGTGACCAGACCC	test
AC093106.5_chr7+:131753785	AC093106.5	GTCACAATATGCCACCACAG	test
AC093106.5_chr7-:131753832	AC093106.5	AGAGGTTAAGCAGCTGCAGG	test
AC093106.5_chr7-:131753872	AC093106.5	GAAAACAGTGGAAGAAACTG	test
AC093106.5_chr7+:131753982	AC093106.5	GCACTCGTGTGTCACATAGG	test
AC093106.5_chr7+:131753979	AC093106.5	GTAGCACTCGTGTGTCACAT	test
AC093106.5_chr7+:131754001	AC093106.5	GAGGTACCCCTAGGAGAGTC	test
AC093106.5_chr7+:131753992	AC093106.5	GTCACATAGGAGGTACCCCT	test
AC093106.5_chr7+:131754002	AC093106.5	AGGTACCCCTAGGAGAGTCA	test
AC093106.5_chr7-:131754060	AC093106.5	GGCCATCCGGCTGCTGAAGG	test
AC093106.5_chr7-:131754063	AC093106.5	GAAGGCCATCCGGCTGCTGA	test
AC093106.5_chr7-:131754054	AC093106.5	CCGGCTGCTGAAGGAGGCTG	test
AC093106.5_chr7-:131753997	AC093106.5	CATCTTCCCTGACTCTCCTA	test
AC093106.5_chr7-:131753996	AC093106.5	ATCTTCCCTGACTCTCCTAG	test
AC093106.5_chr7+:131754019	AC093106.5	TCAGGGAAGATGCATGGCTG	test
AC093106.5_chr7+:131754013	AC093106.5	GGAGAGTCAGGGAAGATGCA	test
AC093106.5_chr7+:131754170	AC093106.5	TGTGGATGCAACACAACTCG	test
AC093106.5_chr7-:131754156	AC093106.5	CGAGTTGTGTTGCATCCACA	test
AC093106.5_chr7+:131754173	AC093106.5	GGATGCAACACAACTCGAGG	test
AC093106.5_chr7-:131754157	AC093106.5	TCGAGTTGTGTTGCATCCAC	test
AC093106.5_chr7-:131754192	AC093106.5	GGTGTTGAGGCTTTAAAAGT	test
AC093106.5_chr7+:131754152	AC093106.5	AGTATCGGTATTTGTCCCTG	test
AC093106.5_chr7-:131754213	AC093106.5	CTGCCTGACCCATCAGCAGA	test
AC093106.5_chr7-:131754193	AC093106.5	AGGTGTTGAGGCTTTAAAAG	test
AC093106.5_chr7+:131754137	AC093106.5	TCATCAAACAAGCAAAGTAT	test
AC093106.5_chr7-:131754205	AC093106.5	CCCATCAGCAGAAGGTGTTG	test
CTD-2515O10.5_chr16-:30064185	CTD-2515O10.5	CCTGCGTACCCGGTACTCAA	test
CTD-2515O10.5_chr16+:30064197	CTD-2515O10.5	CCTTGAGTACCGGGTACGCA	test
CTD-2515O10.5_chr16+:30064163	CTD-2515O10.5	TCACCACACACAAGTGTTAT	test
CTD-2515O10.5_chr16+:30064196	CTD-2515O10.5	CCCTTGAGTACCGGGTACGC	test
CTD-2515O10.5_chr16-:30064186	CTD-2515O10.5	CCCTGCGTACCCGGTACTCA	test
CTD-2515O10.5_chr16-:30064195	CTD-2515O10.5	TTGAGGCACCCCTGCGTACC	test
CTD-2515O10.5_chr16-:30064212	CTD-2515O10.5	CCGTGGACGGAGTGTGGTTG	test
CTD-2515O10.5_chr16-:30064155	CTD-2515O10.5	CCTCCTATAACACTTGTGTG	test
CTD-2515O10.5_chr16+:30064198	CTD-2515O10.5	CTTGAGTACCGGGTACGCAG	test
CTD-2515O10.5_chr16+:30064188	CTD-2515O10.5	GAGTCTGGCCCTTGAGTACC	test
CTD-2515O10.5_chr16+:30064187	CTD-2515O10.5	GGAGTCTGGCCCTTGAGTAC	test
CTD-2515O10.5_chr16+:30064166	CTD-2515O10.5	CCACACACAAGTGTTATAGG	test
CTD-2515O10.5_chr16+:30064335	CTD-2515O10.5	CCATCACCGCAGGGAGTCAA	test
CTD-2515O10.5_chr16+:30064325	CTD-2515O10.5	AGAACAGCCACCATCACCGC	test
CTD-2515O10.5_chr16+:30064326	CTD-2515O10.5	GAACAGCCACCATCACCGCA	test
CTD-2515O10.5_chr16-:30064321	CTD-2515O10.5	TTGACTCCCTGCGGTGATGG	test
CTD-2515O10.5_chr16+:30064334	CTD-2515O10.5	ACCATCACCGCAGGGAGTCA	test
CTD-2515O10.5_chr16+:30064338	CTD-2515O10.5	TCACCGCAGGGAGTCAAGGG	test
CTD-2515O10.5_chr16-:30064324	CTD-2515O10.5	CCCTTGACTCCCTGCGGTGA	test
CTD-2515O10.5_chr16-:30064304	CTD-2515O10.5	TGGTGGCTGTTCTGATTCTC	test
CTD-2515O10.5_chr16-:30064296	CTD-2515O10.5	GTTCTGATTCTCTGGAGCCC	test
CTD-2515O10.5_chr16+:30064341	CTD-2515O10.5	CCGCAGGGAGTCAAGGGAGG	test
CTD-2515O10.5_chr16-:30064330	CTD-2515O10.5	CCTCCTCCCTTGACTCCCTG	test
CTD-2515O10.5_chr16+:30064362	CTD-2515O10.5	GGGAGATTAGAGAAGGAGCC	test
CTD-2515O10.5_chr16-:30064225	CTD-2515O10.5	AATAACGGAGAGTCCGTGGA	test
CTD-2515O10.5_chr16+:30064223	CTD-2515O10.5	CCTCAACCACACTCCGTCCA	test
CTD-2515O10.5_chr16-:30064229	CTD-2515O10.5	CTAAAATAACGGAGAGTCCG	test
CTD-2515O10.5_chr16-:30064390	CTD-2515O10.5	GTGAGGGGACTCGGATCACG	test
CTD-2515O10.5_chr16-:30064423	CTD-2515O10.5	ATCTTTGGCCAGGGACCTGT	test
CTD-2515O10.5_chr16-:30064240	CTD-2515O10.5	ACACTCACCTCCTAAAATAA	test
CTD-2515O10.5_chr16-:30064267	CTD-2515O10.5	TTAAGAAGGAGAGTAGATAC	test
CTD-2515O10.5_chr16-:30064424	CTD-2515O10.5	AATCTTTGGCCAGGGACCTG	test
CTD-2515O10.5_chr16-:30064218	CTD-2515O10.5	GAGAGTCCGTGGACGGAGTG	test
CTD-2515O10.5_chr16+:30064501	CTD-2515O10.5	AAGAATTTCCTCTGAAGCAC	test
CTD-2515O10.5_chr16-:30064484	CTD-2515O10.5	CTTCAGAGGAAATTCTTCCT	test
CTD-2515O10.5_chr16-:30064419	CTD-2515O10.5	TTGGCCAGGGACCTGTGGGA	test
CTD-2515O10.5_chr16+:30064366	CTD-2515O10.5	GATTAGAGAAGGAGCCAGGG	test
CTD-2515O10.5_chr16+:30064363	CTD-2515O10.5	GGAGATTAGAGAAGGAGCCA	test
CTD-2515O10.5_chr16+:30064342	CTD-2515O10.5	CGCAGGGAGTCAAGGGAGGA	test
CTD-2515O10.5_chr16+:30064419	CTD-2515O10.5	CTCACCCCTTTCCTTCCCAC	test
CTD-2515O10.5_chr16-:30064498	CTD-2515O10.5	CCCACTCACCGGTGCTTCAG	test
CTD-2515O10.5_chr16+:30064289	CTD-2515O10.5	TCTCCTTCTTAAAAAAAACC	test
CTD-2515O10.5_chr16-:30064399	CTD-2515O10.5	AGGAAAGGGGTGAGGGGACT	test
CTD-2515O10.5_chr16-:30064412	CTD-2515O10.5	GGGACCTGTGGGAAGGAAAG	test
CTD-2515O10.5_chr16+:30064367	CTD-2515O10.5	ATTAGAGAAGGAGCCAGGGA	test
CTD-2515O10.5_chr16+:30064290	CTD-2515O10.5	CTCCTTCTTAAAAAAAACCA	test
CTD-2515O10.5_chr16-:30064414	CTD-2515O10.5	CAGGGACCTGTGGGAAGGAA	test
CTD-2515O10.5_chr16-:30064413	CTD-2515O10.5	AGGGACCTGTGGGAAGGAAA	test
CTD-2515O10.5_chr16-:30064369	CTD-2515O10.5	GGCCTCCCTGCCACCCTCCC	test
CTD-2515O10.5_chr16-:30064407	CTD-2515O10.5	CTGTGGGAAGGAAAGGGGTG	test
CTD-2515O10.5_chr16-:30064406	CTD-2515O10.5	TGTGGGAAGGAAAGGGGTGA	test
CTD-2515O10.5_chr16+:30064456	CTD-2515O10.5	TTTATTTCTCTTGACAACCA	test
CTD-2515O10.5_chr16+:30064457	CTD-2515O10.5	TTATTTCTCTTGACAACCAA	test
CTD-2515O10.5_chr16+:30064355	CTD-2515O10.5	GGGAGGAGGGAGATTAGAGA	test
CTD-2515O10.5_chr16+:30064426	CTD-2515O10.5	CTTTCCTTCCCACAGGTCCC	test
CTD-2515O10.5_chr16-:30064438	CTD-2515O10.5	TGTCAAGAGAAATAAATCTT	test
HIST1H4PS1_chr6-:27807153	HIST1H4PS1	AGAATGCGTTTGACACCGCC	test
HIST1H4PS1_chr6+:27807166	HIST1H4PS1	TGGCGGTGTCAAACGCATTC	test
HIST1H4PS1_chr6+:27807060	HIST1H4PS1	CATGTCTGGTTGCGCAAGTG	test
HIST1H4PS1_chr6+:27807046	HIST1H4PS1	TCGTGCCTTAAAATCATGTC	test
HIST1H4PS1_chr6+:27807061	HIST1H4PS1	ATGTCTGGTTGCGCAAGTGA	test
HIST1H4PS1_chr6-:27807095	HIST1H4PS1	TGTTGCACAGCAACTTGCGG	test
HIST1H4PS1_chr6-:27807098	HIST1H4PS1	GGATGTTGCACAGCAACTTG	test
HIST1H4PS1_chr6-:27807148	HIST1H4PS1	GCGTTTGACACCGCCAGGCC	test
HIST1H4PS1_chr6-:27807119	HIST1H4PS1	GTGGTGGGTCTGGTGATGTC	test
HIST1H4PS1_chr6+:27807071	HIST1H4PS1	GCGCAAGTGAGGGAAAGGAT	test
HIST1H4PS1_chr6+:27807134	HIST1H4PS1	ACATCACCAGACCCACCACC	test
HIST1H4PS1_chr6+:27807066	HIST1H4PS1	TGGTTGCGCAAGTGAGGGAA	test
HIST1H4PS1_chr6+:27807072	HIST1H4PS1	CGCAAGTGAGGGAAAGGATT	test
HIST1H4PS1_chr6-:27807141	HIST1H4PS1	ACACCGCCAGGCCAGGCTCC	test
HIST1H4PS1_chr6+:27807078	HIST1H4PS1	TGAGGGAAAGGATTGGGTAA	test
HIST1H4PS1_chr6-:27807129	HIST1H4PS1	CAGGCTCCAGGTGGTGGGTC	test
HIST1H4PS1_chr6-:27807134	HIST1H4PS1	CAGGCCAGGCTCCAGGTGGT	test
HIST1H4PS1_chr6+:27807081	HIST1H4PS1	GGGAAAGGATTGGGTAAAGG	test
HIST1H4PS1_chr6-:27807138	HIST1H4PS1	CCGCCAGGCCAGGCTCCAGG	test
HIST1H4PS1_chr6+:27807080	HIST1H4PS1	AGGGAAAGGATTGGGTAAAG	test
HIST1H4PS1_chr6+:27807146	HIST1H4PS1	CCACCACCTGGAGCCTGGCC	test
HIST1H4PS1_chr6+:27807149	HIST1H4PS1	CCACCTGGAGCCTGGCCTGG	test
HIST1H4PS1_chr6-:27807135	HIST1H4PS1	CCAGGCCAGGCTCCAGGTGG	test
RP11-266L9.8_chr16-:25106625	RP11-266L9.8	TTTCCGGGTTGACCCGCTGT	test
RP11-266L9.8_chr16+:25106699	RP11-266L9.8	GCGTTAGGGACAGAAGTCAT	test
RP11-266L9.8_chr16-:25106624	RP11-266L9.8	TTCCGGGTTGACCCGCTGTT	test
RP11-266L9.8_chr16+:25106624	RP11-266L9.8	CTTAAAGGACTCCCAACAGC	test
RP11-266L9.8_chr16+:25106633	RP11-266L9.8	CTCCCAACAGCGGGTCAACC	test
RP11-266L9.8_chr16+:25106727	RP11-266L9.8	TAGCACAGGGCAGCGGTCCC	test
RP11-266L9.8_chr16-:25106641	RP11-266L9.8	GGCAGCATTGTCAGACTTTC	test
RP11-266L9.8_chr16+:25106623	RP11-266L9.8	ACTTAAAGGACTCCCAACAG	test
RP11-266L9.8_chr16+:25106609	RP11-266L9.8	TCTTGCTACCATGCACTTAA	test
RP11-266L9.8_chr16-:25106606	RP11-266L9.8	TTGGGAGTCCTTTAAGTGCA	test
RP11-266L9.8_chr16-:25106733	RP11-266L9.8	CCGGAGGACACAGCCAGCCT	test
RP11-266L9.8_chr16-:25106734	RP11-266L9.8	TCCGGAGGACACAGCCAGCC	test
RP11-266L9.8_chr16-:25106640	RP11-266L9.8	GCAGCATTGTCAGACTTTCC	test
RP11-266L9.8_chr16-:25106590	RP11-266L9.8	TGCATGGTAGCAAGAAATAA	test
RP11-266L9.8_chr16+:25106731	RP11-266L9.8	ACAGGGCAGCGGTCCCAGGC	test
RP11-266L9.8_chr16+:25106685	RP11-266L9.8	CAGCGCTCGGCACAGCGTTA	test
RP11-266L9.8_chr16+:25106684	RP11-266L9.8	ACAGCGCTCGGCACAGCGTT	test
RP11-266L9.8_chr16-:25106664	RP11-266L9.8	GTGCCGAGCGCTGTGCTGTG	test
RP11-266L9.8_chr16-:25106665	RP11-266L9.8	TGTGCCGAGCGCTGTGCTGT	test
RP11-266L9.8_chr16+:25106672	RP11-266L9.8	GCCCCCCACAGCACAGCGCT	test
RP11-266L9.8_chr16-:25106663	RP11-266L9.8	TGCCGAGCGCTGTGCTGTGG	test
RP11-266L9.8_chr16-:25106666	RP11-266L9.8	CTGTGCCGAGCGCTGTGCTG	test
RP11-266L9.8_chr16-:25106662	RP11-266L9.8	GCCGAGCGCTGTGCTGTGGG	test
RP11-266L9.8_chr16+:25106838	RP11-266L9.8	CACCCGAGGGGTTGCTACAG	test
RP11-266L9.8_chr16+:25106897	RP11-266L9.8	GGGGGCGATTGAGCGGCAGC	test
RP11-266L9.8_chr16+:25106861	RP11-266L9.8	AGGCAGCGGCCCGTCCCAGA	test
RP11-266L9.8_chr16+:25106890	RP11-266L9.8	AGGACCAGGGGGCGATTGAG	test
RP11-266L9.8_chr16-:25106876	RP11-266L9.8	CTCAATCGCCCCCTGGTCCT	test
RP11-266L9.8_chr16-:25106865	RP11-266L9.8	CCTGGTCCTTGGCGACCATC	test
RP11-266L9.8_chr16+:25106896	RP11-266L9.8	AGGGGGCGATTGAGCGGCAG	test
RP11-266L9.8_chr16+:25106877	RP11-266L9.8	CAGATGGTCGCCAAGGACCA	test
RP11-266L9.8_chr16+:25106841	RP11-266L9.8	CCGAGGGGTTGCTACAGAGG	test
RP11-266L9.8_chr16-:25106859	RP11-266L9.8	CCTTGGCGACCATCTGGGAC	test
RP11-266L9.8_chr16+:25106878	RP11-266L9.8	AGATGGTCGCCAAGGACCAG	test
RP11-266L9.8_chr16+:25106870	RP11-266L9.8	CCCGTCCCAGATGGTCGCCA	test
RP11-266L9.8_chr16-:25106950	RP11-266L9.8	CGACCTGACTATGGGCCGGT	test
RP11-266L9.8_chr16-:25106944	RP11-266L9.8	GACTATGGGCCGGTCGGCTC	test
RP11-266L9.8_chr16+:25106958	RP11-266L9.8	GAGCCGACCGGCCCATAGTC	test
RP11-266L9.8_chr16+:25106946	RP11-266L9.8	TGGTTCGGTCCAGAGCCGAC	test
RP11-266L9.8_chr16+:25106962	RP11-266L9.8	CGACCGGCCCATAGTCAGGT	test
RP11-266L9.8_chr16-:25106958	RP11-266L9.8	CAGGTGGCCGACCTGACTAT	test
RP11-266L9.8_chr16-:25106954	RP11-266L9.8	TGGCCGACCTGACTATGGGC	test
RP11-266L9.8_chr16-:25106959	RP11-266L9.8	GCAGGTGGCCGACCTGACTA	test
RP11-266L9.8_chr16+:25106978	RP11-266L9.8	AGGTCGGCCACCTGCTGATG	test
RP11-266L9.8_chr16+:25107009	RP11-266L9.8	CTTCTTCAAGGCAGCGGCGG	test
RP11-266L9.8_chr16-:25106977	RP11-266L9.8	AGCAGTTCAACCTCATCAGC	test
RP11-266L9.8_chr16-:25106974	RP11-266L9.8	AGTTCAACCTCATCAGCAGG	test
RMRP_chr9-:35657777	RMRP	GTCCGCGCACCAACCACACG	test
RMRP_chr9-:35657848	RMRP	GCGTATCCCGCTGAGCGGCG	test
RMRP_chr9+:35657866	RMRP	GCTCAGCGGGATACGCTTCT	test
RMRP_chr9+:35657812	RMRP	CGCACTGCCTGCGTAACTAG	test
RMRP_chr9-:35657779	RMRP	GTGTCCGCGCACCAACCACA	test
RMRP_chr9-:35657853	RMRP	AAGAAGCGTATCCCGCTGAG	test
RMRP_chr9+:35657813	RMRP	GCACTGCCTGCGTAACTAGA	test
RMRP_chr9+:35657822	RMRP	GCGTAACTAGAGGGAGCTGA	test
RMRP_chr9-:35657843	RMRP	TCCCGCTGAGCGGCGTGGCG	test
RMRP_chr9-:35657841	RMRP	CCGCTGAGCGGCGTGGCGCG	test
RMRP_chr9+:35657786	RMRP	AGCCCCGTGTGGTTGGTGCG	test
RMRP_chr9-:35657808	RMRP	TCAGCTCCCTCTAGTTACGC	test
RMRP_chr9-:35657778	RMRP	TGTCCGCGCACCAACCACAC	test
RMRP_chr9+:35657852	RMRP	CCCCGCGCCACGCCGCTCAG	test
RMRP_chr9+:35657775	RMRP	CGCTGAGAATGAGCCCCGTG	test
RMRP_chr9-:35657842	RMRP	CCCGCTGAGCGGCGTGGCGC	test
RMRP_chr9-:35657761	RMRP	CACGGGGCTCATTCTCAGCG	test
RMRP_chr9+:35657779	RMRP	GAGAATGAGCCCCGTGTGGT	test
RMRP_chr9-:35657840	RMRP	CGCTGAGCGGCGTGGCGCGG	test
RMRP_chr9+:35657737	RMRP	CTGCAGTGAGCCGTGGTCTC	test
RMRP_chr9+:35657736	RMRP	GCTGCAGTGAGCCGTGGTCT	test
RMRP_chr9+:35657869	RMRP	CAGCGGGATACGCTTCTTGG	test
RMRP_chr9+:35657853	RMRP	CCCGCGCCACGCCGCTCAGC	test
RP11-68I3.7_chr17-:29591990	RP11-68I3.7	AAAAGCTTGCAAACTCTCTC	test
RP11-68I3.7_chr17+:29591960	RP11-68I3.7	CAGGGTGTGGAGGAGGAAGG	test
RP11-68I3.7_chr17+:29591961	RP11-68I3.7	AGGGTGTGGAGGAGGAAGGA	test
RP11-68I3.7_chr17+:29591957	RP11-68I3.7	CCACAGGGTGTGGAGGAGGA	test
RP11-68I3.7_chr17-:29591757	RP11-68I3.7	GGCGCGGTTGAGGGGCATCT	test
RP11-68I3.7_chr17+:29591818	RP11-68I3.7	CACGACACTCTGCTGACCCC	test
RP11-68I3.7_chr17+:29591843	RP11-68I3.7	GTGCAGGCGGGCAGCGGTCC	test
RP11-68I3.7_chr17-:29591790	RP11-68I3.7	GTCGTGGCTGCAGCCAGTGC	test
RP11-68I3.7_chr17+:29591844	RP11-68I3.7	TGCAGGCGGGCAGCGGTCCC	test
RP11-68I3.7_chr17-:29591825	RP11-68I3.7	CGCTGCCCGCCTGCACCACC	test
RP11-68I3.7_chr17-:29591789	RP11-68I3.7	TCGTGGCTGCAGCCAGTGCA	test
RP11-68I3.7_chr17-:29591748	RP11-68I3.7	GAGGGGCATCTAGGAGTGGC	test
RP11-68I3.7_chr17-:29591882	RP11-68I3.7	CCTCGCCCCTTTCTCCCGCC	test
RP11-68I3.7_chr17-:29591766	RP11-68I3.7	GAGGGGGCTGGCGCGGTTGA	test
RP11-68I3.7_chr17-:29591752	RP11-68I3.7	GGTTGAGGGGCATCTAGGAG	test
RP11-68I3.7_chr17-:29591881	RP11-68I3.7	CTCGCCCCTTTCTCCCGCCT	test
RP11-68I3.7_chr17-:29591823	RP11-68I3.7	CTGCCCGCCTGCACCACCAG	test
RP11-68I3.7_chr17+:29591821	RP11-68I3.7	GACACTCTGCTGACCCCTGG	test
RP11-68I3.7_chr17-:29591806	RP11-68I3.7	CAGGGGTCAGCAGAGTGTCG	test
RP11-68I3.7_chr17+:29591740	RP11-68I3.7	GAAATGCACAGGCATGCTCC	test
RP11-68I3.7_chr17-:29591765	RP11-68I3.7	AGGGGGCTGGCGCGGTTGAG	test
RP11-68I3.7_chr17+:29591831	RP11-68I3.7	TGACCCCTGGTGGTGCAGGC	test
RP11-68I3.7_chr17-:29591824	RP11-68I3.7	GCTGCCCGCCTGCACCACCA	test
RP11-68I3.7_chr17+:29591875	RP11-68I3.7	GACGCCAGCTGGCTCCTCCC	test
RP11-68I3.7_chr17-:29591878	RP11-68I3.7	GCCCCTTTCTCCCGCCTGGG	test
RP11-68I3.7_chr17-:29591747	RP11-68I3.7	AGGGGCATCTAGGAGTGGCC	test
RP11-68I3.7_chr17+:29591827	RP11-68I3.7	CTGCTGACCCCTGGTGGTGC	test
RP11-726G23.10_chr8-:43276346	RP11-726G23.10	GCATTGCACTTTCCTCCACG	test
RP11-726G23.10_chr8+:43276310	RP11-726G23.10	TTGCCTGTTGGCCGCCAGCG	test
RP11-726G23.10_chr8-:43276293	RP11-726G23.10	TGGCGGCCAACAGGCAAAGC	test
RP11-726G23.10_chr8-:43276345	RP11-726G23.10	CATTGCACTTTCCTCCACGT	test
RP11-726G23.10_chr8+:43276316	RP11-726G23.10	GTTGGCCGCCAGCGGGGACG	test
RP11-726G23.10_chr8-:43276343	RP11-726G23.10	TTGCACTTTCCTCCACGTGG	test
RP11-726G23.10_chr8+:43276308	RP11-726G23.10	CTTTGCCTGTTGGCCGCCAG	test
RP11-726G23.10_chr8+:43276363	RP11-726G23.10	GGAGGAAAGTGCAATGCTTC	test
RP11-726G23.10_chr8+:43276298	RP11-726G23.10	CAAGGACCGGCTTTGCCTGT	test
RP11-726G23.10_chr8-:43276313	RP11-726G23.10	CCGCAGCTCCGCGTCCCCGC	test
RP11-726G23.10_chr8-:43276394	RP11-726G23.10	ACTCCACGCTGGAGGAGCGG	test
RP11-726G23.10_chr8+:43276342	RP11-726G23.10	TGCGGCTGGGAGCCCCCACG	test
RP11-726G23.10_chr8+:43276309	RP11-726G23.10	TTTGCCTGTTGGCCGCCAGC	test
RP11-726G23.10_chr8-:43276310	RP11-726G23.10	CAGCTCCGCGTCCCCGCTGG	test
RP11-726G23.10_chr8-:43276405	RP11-726G23.10	GTTGGAGGTGGACTCCACGC	test
RP11-726G23.10_chr8-:43276344	RP11-726G23.10	ATTGCACTTTCCTCCACGTG	test
RP11-726G23.10_chr8-:43276385	RP11-726G23.10	TGGAGGAGCGGTGGTGCAGC	test
RP11-726G23.10_chr8+:43276324	RP11-726G23.10	CCAGCGGGGACGCGGAGCTG	test
RP11-726G23.10_chr8+:43276328	RP11-726G23.10	CGGGGACGCGGAGCTGCGGC	test
RP11-726G23.10_chr8-:43276397	RP11-726G23.10	TGGACTCCACGCTGGAGGAG	test
RP11-726G23.10_chr8+:43276285	RP11-726G23.10	GCTCCTGGGAGGCCAAGGAC	test
RP11-726G23.10_chr8+:43276329	RP11-726G23.10	GGGGACGCGGAGCTGCGGCT	test
RP11-726G23.10_chr8-:43276420	RP11-726G23.10	GAGGGAGAAAAAGCAGTTGG	test
RP11-726G23.10_chr8+:43276643	RP11-726G23.10	GCACTTGAAGGCGCACTGCT	test
RP11-726G23.10_chr8-:43276582	RP11-726G23.10	CCACGCGCAGGTGTGCGTCC	test
RP11-726G23.10_chr8+:43276593	RP11-726G23.10	CCAGGACGCACACCTGCGCG	test
RP11-726G23.10_chr8+:43276594	RP11-726G23.10	CAGGACGCACACCTGCGCGT	test
RP11-726G23.10_chr8-:43276580	RP11-726G23.10	ACGCGCAGGTGTGCGTCCTG	test
RP11-726G23.10_chr8+:43276514	RP11-726G23.10	TTCCTGGAAGACTCGGCGGA	test
RP11-726G23.10_chr8-:43276623	RP11-726G23.10	GCGCCTTCAAGTGCATTCTC	test
RP11-726G23.10_chr8+:43276682	RP11-726G23.10	GCCAGCCGGTGGCAGTTCTT	test
RP11-726G23.10_chr8+:43276716	RP11-726G23.10	ACTTGCATCCAGGTCCATTT	test
RP11-726G23.10_chr8+:43276706	RP11-726G23.10	ACGTCCAGGAACTTGCATCC	test
RP11-726G23.10_chr8+:43276671	RP11-726G23.10	GGGATCACCTGGCCAGCCGG	test
RP11-726G23.10_chr8-:43276594	RP11-726G23.10	AGAAAGTGCTGCCCACGCGC	test
RP11-726G23.10_chr8+:43276553	RP11-726G23.10	CTCAGCAGGATGACTCCCAC	test
RP11-726G23.10_chr8-:43276734	RP11-726G23.10	AGGTGGAGAACAACCCAAGG	test
RP11-726G23.10_chr8+:43276649	RP11-726G23.10	GAAGGCGCACTGCTTGGTGA	test
RP11-726G23.10_chr8+:43276761	RP11-726G23.10	TCCACCTGCAAGCCCCGGTC	test
RP11-726G23.10_chr8-:43276672	RP11-726G23.10	GCCCAAGAACTGCCACCGGC	test
RP11-726G23.10_chr8-:43276713	RP11-726G23.10	GGCGGAGTCCAAAATGGACC	test
RP11-726G23.10_chr8-:43276762	RP11-726G23.10	AAATGCAAACAGCCAGACCG	test
RP11-726G23.10_chr8-:43276676	RP11-726G23.10	ACGTGCCCAAGAACTGCCAC	test
RP11-726G23.10_chr8+:43276515	RP11-726G23.10	TCCTGGAAGACTCGGCGGAG	test
RP11-726G23.10_chr8+:43276498	RP11-726G23.10	TAGGCCCGAGCTGTTCTTCC	test
RP11-726G23.10_chr8-:43276622	RP11-726G23.10	CGCCTTCAAGTGCATTCTCT	test
RP11-726G23.10_chr8+:43276681	RP11-726G23.10	GGCCAGCCGGTGGCAGTTCT	test
RP11-726G23.10_chr8-:43276557	RP11-726G23.10	ACTGCGGGACAGGAGCCAGT	test
RP11-726G23.10_chr8+:43276510	RP11-726G23.10	GTTCTTCCTGGAAGACTCGG	test
RP11-726G23.10_chr8-:43276699	RP11-726G23.10	TGGACCTGGATGCAAGTTCC	test
RP11-726G23.10_chr8+:43276524	RP11-726G23.10	ACTCGGCGGAGGGGAACAGG	test
RP11-726G23.10_chr8-:43276567	RP11-726G23.10	CGTCCTGGGGACTGCGGGAC	test
RP11-726G23.10_chr8-:43276541	RP11-726G23.10	CAGTGGGAGTCATCCTGCTG	test
RP11-726G23.10_chr8+:43276521	RP11-726G23.10	AAGACTCGGCGGAGGGGAAC	test
RP11-726G23.10_chr8-:43276581	RP11-726G23.10	CACGCGCAGGTGTGCGTCCT	test
RP11-726G23.10_chr8-:43276667	RP11-726G23.10	AGAACTGCCACCGGCTGGCC	test
RP11-726G23.10_chr8-:43276719	RP11-726G23.10	CAAGGAGGCGGAGTCCAAAA	test
RP11-726G23.10_chr8-:43276764	RP11-726G23.10	GAAAATGCAAACAGCCAGAC	test
RP11-726G23.10_chr8-:43276751	RP11-726G23.10	GCCAGACCGGGGCTTGCAGG	test
RP11-726G23.10_chr8-:43276754	RP11-726G23.10	ACAGCCAGACCGGGGCTTGC	test
RP11-726G23.10_chr8+:43276756	RP11-726G23.10	TGTTCTCCACCTGCAAGCCC	test
RP11-726G23.10_chr8-:43276737	RP11-726G23.10	TGCAGGTGGAGAACAACCCA	test
RP11-726G23.10_chr8+:43276660	RP11-726G23.10	GCTTGGTGATGGGGATCACC	test
RP11-726G23.10_chr8+:43276631	RP11-726G23.10	GCCCCAGAGAATGCACTTGA	test
RP11-726G23.10_chr8-:43276505	RP11-726G23.10	TCCCCTCCGCCGAGTCTTCC	test
RP11-726G23.10_chr8+:43276479	RP11-726G23.10	AAAATTCGTGAAGGTGCTTT	test
RP11-726G23.10_chr8-:43276491	RP11-726G23.10	TCTTCCAGGAAGAACAGCTC	test
RP11-726G23.10_chr8-:43276621	RP11-726G23.10	GCCTTCAAGTGCATTCTCTG	test
AC005618.8_chr5+:141350000	AC005618.8	GCGCTTTGAGGATAAAAAGC	test
AC005618.8_chr5+:141350052	AC005618.8	GGGCGCCGCTGTCGACCAAA	test
AC005618.8_chr5+:141350087	AC005618.8	CTCAATTCTGCAGGAGCGTC	test
AC005618.8_chr5-:141350110	AC005618.8	CTCAGTGCACCGGACAAAGC	test
AC005618.8_chr5+:141349975	AC005618.8	ACAGGGTACATAGATTCAAG	test
AC005618.8_chr5-:141350027	AC005618.8	GCGGCGCCCAGAGGTTGTCT	test
AC005618.8_chr5+:141350091	AC005618.8	ATTCTGCAGGAGCGTCAGGC	test
AC005618.8_chr5+:141349988	AC005618.8	ATTCAAGAGGTTGCGCTTTG	test
AC005618.8_chr5+:141350092	AC005618.8	TTCTGCAGGAGCGTCAGGCA	test
AC005618.8_chr5+:141350078	AC005618.8	TGAAGGCTTCTCAATTCTGC	test
AC005618.8_chr5-:141350013	AC005618.8	TTGTCTTGGAAAACTGCACA	test
AC005618.8_chr5-:141350014	AC005618.8	GTTGTCTTGGAAAACTGCAC	test
AC005618.8_chr5-:141350106	AC005618.8	GTGCACCGGACAAAGCAGGA	test
AC005618.8_chr5+:141350001	AC005618.8	CGCTTTGAGGATAAAAAGCT	test
AC005618.8_chr5+:141350061	AC005618.8	TGTCGACCAAAAGGAAGTGA	test
AC005618.8_chr5+:141349958	AC005618.8	CCTCCAGCAAATTAAAGACA	test
AC005618.8_chr5-:141350056	AC005618.8	GAGAAGCCTTCACTTCCTTT	test
AC005618.8_chr5-:141350036	AC005618.8	TGGTCGACAGCGGCGCCCAG	test
AC005618.8_chr5-:141350232	AC005618.8	CCGCGGAGCTTCTTTCCTCT	test
AC005618.8_chr5-:141350233	AC005618.8	TCCGCGGAGCTTCTTTCCTC	test
AC005618.8_chr5-:141350249	AC005618.8	TGCATTTCAGGAACTCTCCG	test
AC005618.8_chr5-:141350277	AC005618.8	TTTCATCATTTCGGCTTCTC	test
AC005618.8_chr5+:141350194	AC005618.8	GCTCAAATCACAGAAGTCCA	test
AC005618.8_chr5+:141350243	AC005618.8	CCCAGAGGAAAGAAGCTCCG	test
AC005618.8_chr5+:141350193	AC005618.8	AGCTCAAATCACAGAAGTCC	test
AC005618.8_chr5-:141350200	AC005618.8	AAAAAGAAATGGCAGCACCC	test
AC005618.8_chr5-:141350261	AC005618.8	TCTCTGGCTCTCTGCATTTC	test
CTD-2083E4.7_chr5+:195932	CTD-2083E4.7	CTGCCGCTTACGGGATGAGG	test
CTD-2083E4.7_chr5-:195920	CTD-2083E4.7	CACCTCATCCCGTAAGCGGC	test
CTD-2083E4.7_chr5+:195933	CTD-2083E4.7	TGCCGCTTACGGGATGAGGT	test
CTD-2083E4.7_chr5-:195924	CTD-2083E4.7	GGCCCACCTCATCCCGTAAG	test
CTD-2083E4.7_chr5+:195907	CTD-2083E4.7	GCTGGTCACAACCCGCTGTC	test
CTD-2083E4.7_chr5+:195922	CTD-2083E4.7	CTGTCTGGACCTGCCGCTTA	test
CTD-2083E4.7_chr5-:195908	CTD-2083E4.7	TAAGCGGCAGGTCCAGACAG	test
CTD-2083E4.7_chr5-:195890	CTD-2083E4.7	AGCGGGTTGTGACCAGCAGT	test
CTD-2083E4.7_chr5+:195929	CTD-2083E4.7	GACCTGCCGCTTACGGGATG	test
CTD-2083E4.7_chr5-:195945	CTD-2083E4.7	AGAAGCCCCGCGTTCCCTGC	test
CTD-2083E4.7_chr5-:195907	CTD-2083E4.7	AAGCGGCAGGTCCAGACAGC	test
CTD-2083E4.7_chr5+:195849	CTD-2083E4.7	GCGAAAAATGAACAGCAAAC	test
CTD-2083E4.7_chr5-:195891	CTD-2083E4.7	CAGCGGGTTGTGACCAGCAG	test
CTD-2083E4.7_chr5+:195923	CTD-2083E4.7	TGTCTGGACCTGCCGCTTAC	test
CTD-2083E4.7_chr5-:195887	CTD-2083E4.7	GGGTTGTGACCAGCAGTGGG	test
CTD-2083E4.7_chr5-:195886	CTD-2083E4.7	GGTTGTGACCAGCAGTGGGT	test
CTD-2083E4.7_chr5+:195889	CTD-2083E4.7	AGGAGGCTCCCACCCACTGC	test
CTD-2083E4.7_chr5+:195942	CTD-2083E4.7	CGGGATGAGGTGGGCCTGCA	test
CTD-2083E4.7_chr5+:195941	CTD-2083E4.7	ACGGGATGAGGTGGGCCTGC	test
CTD-2083E4.7_chr5-:195857	CTD-2083E4.7	CTGCTGGAGGAAGCAGGGTC	test
CTD-2083E4.7_chr5+:195869	CTD-2083E4.7	CGGACCCTGCTTCCTCCAGC	test
CTD-2083E4.7_chr5-:195870	CTD-2083E4.7	GGGTGGGAGCCTCCTGCTGG	test
CTD-2083E4.7_chr5-:195862	CTD-2083E4.7	GCCTCCTGCTGGAGGAAGCA	test
CTD-2083E4.7_chr5+:196027	CTD-2083E4.7	ACCGTGAGGGGCATCCGAGT	test
CTD-2083E4.7_chr5-:196105	CTD-2083E4.7	GTGAGAAACAGTGGCGCGGT	test
CTD-2083E4.7_chr5+:196059	CTD-2083E4.7	GCGTCCGCTGAAGAGCCGCC	test
CTD-2083E4.7_chr5-:196104	CTD-2083E4.7	TGAGAAACAGTGGCGCGGTC	test
CTD-2083E4.7_chr5+:196026	CTD-2083E4.7	AACCGTGAGGGGCATCCGAG	test
CTD-2083E4.7_chr5+:196082	CTD-2083E4.7	ACCAGGGCGGTCAGCGCTGC	test
CTD-2083E4.7_chr5-:196066	CTD-2083E4.7	AGCGCTGACCGCCCTGGTCC	test
CTD-2083E4.7_chr5+:196083	CTD-2083E4.7	CCAGGGCGGTCAGCGCTGCG	test
CTD-2083E4.7_chr5-:196030	CTD-2083E4.7	GACGCCTGTGCTCACCCACT	test
CTD-2083E4.7_chr5+:196037	CTD-2083E4.7	GCATCCGAGTGGGTGAGCAC	test
CTD-2083E4.7_chr5-:196063	CTD-2083E4.7	GCTGACCGCCCTGGTCCAGG	test
CTD-2083E4.7_chr5-:196098	CTD-2083E4.7	ACAGTGGCGCGGTCGGGCAA	test
RP11-746M1.1_chr17+:21000208	RP11-746M1.1	ACCTACATGGGGTGATTACT	test
RP11-746M1.1_chr17+:21000215	RP11-746M1.1	TGGGGTGATTACTAGGCAAC	test
RP11-746M1.1_chr17-:21000198	RP11-746M1.1	GCCTAGTAATCACCCCATGT	test
RP11-746M1.1_chr17+:21000196	RP11-746M1.1	GTCACAATGTACACCTACAT	test
RP11-746M1.1_chr17+:21000214	RP11-746M1.1	ATGGGGTGATTACTAGGCAA	test
RP11-746M1.1_chr17+:21000197	RP11-746M1.1	TCACAATGTACACCTACATG	test
RP11-746M1.1_chr17-:21000152	RP11-746M1.1	TGACCACTAAGGGGCCCCCT	test
RP11-746M1.1_chr17+:21000160	RP11-746M1.1	TCACCAAGGGGGCCCCTTAG	test
RP11-746M1.1_chr17+:21000147	RP11-746M1.1	GAATGTGCTGGGGTCACCAA	test
RP11-746M1.1_chr17+:21000195	RP11-746M1.1	TGTCACAATGTACACCTACA	test
RP11-746M1.1_chr17-:21000163	RP11-746M1.1	CAAAGTGCATCTGACCACTA	test
RP11-746M1.1_chr17-:21000161	RP11-746M1.1	AAGTGCATCTGACCACTAAG	test
RP11-746M1.1_chr17+:21000148	RP11-746M1.1	AATGTGCTGGGGTCACCAAG	test
RP11-746M1.1_chr17-:21000162	RP11-746M1.1	AAAGTGCATCTGACCACTAA	test
RP11-746M1.1_chr17-:21000106	RP11-746M1.1	TGTTAAAATGGCCTGCATTT	test
RP11-746M1.1_chr17+:21000071	RP11-746M1.1	AGGCCATGTGTCTTCCTGGG	test
RP11-746M1.1_chr17+:21000146	RP11-746M1.1	TGAATGTGCTGGGGTCACCA	test
RP11-746M1.1_chr17+:21000149	RP11-746M1.1	ATGTGCTGGGGTCACCAAGG	test
RP11-746M1.1_chr17-:21000074	RP11-746M1.1	CTGGCCTTTCAGTGCCTCCC	test
RP11-746M1.1_chr17+:21000081	RP11-746M1.1	TCTTCCTGGGAGGCACTGAA	test
RP11-746M1.1_chr17+:21000137	RP11-746M1.1	ACACTGCTGTGAATGTGCTG	test
RP11-746M1.1_chr17+:21000067	RP11-746M1.1	GGAAAGGCCATGTGTCTTCC	test
RP11-746M1.1_chr17+:21000068	RP11-746M1.1	GAAAGGCCATGTGTCTTCCT	test
RP11-746M1.1_chr17-:21000338	RP11-746M1.1	CTGGCACTGCCCCTTGCATT	test
RP11-746M1.1_chr17-:21000375	RP11-746M1.1	GCTGCTGAAGAGCTGCTCAC	test
RP11-746M1.1_chr17-:21000372	RP11-746M1.1	GCTGAAGAGCTGCTCACAGG	test
RP11-746M1.1_chr17-:21000363	RP11-746M1.1	CTGCTCACAGGAGGCGGCGG	test
RP11-746M1.1_chr17-:21000369	RP11-746M1.1	GAAGAGCTGCTCACAGGAGG	test
RP11-746M1.1_chr17-:21000366	RP11-746M1.1	GAGCTGCTCACAGGAGGCGG	test
RP11-746M1.1_chr17-:21000357	RP11-746M1.1	ACAGGAGGCGGCGGCGGCCC	test
RP11-746M1.1_chr17+:21000338	RP11-746M1.1	CAAACACAAGACCTAATGCA	test
RP11-746M1.1_chr17+:21000339	RP11-746M1.1	AAACACAAGACCTAATGCAA	test
RP11-746M1.1_chr17+:21000351	RP11-746M1.1	TAATGCAAGGGGCAGTGCCA	test
RP11-746M1.1_chr17+:21000350	RP11-746M1.1	CTAATGCAAGGGGCAGTGCC	test
RP11-746M1.1_chr17+:21000340	RP11-746M1.1	AACACAAGACCTAATGCAAG	test
RP5-940J5.9_chr12+:6538033	RP5-940J5.9	GACTGGCTCTTAAAAAGTGC	test
RP5-940J5.9_chr12+:6538049	RP5-940J5.9	GTGCAGGGTCTGGCGCCCTC	test
RP5-940J5.9_chr12+:6538039	RP5-940J5.9	CTCTTAAAAAGTGCAGGGTC	test
RP5-940J5.9_chr12+:6538034	RP5-940J5.9	ACTGGCTCTTAAAAAGTGCA	test
RP5-940J5.9_chr12+:6538069	RP5-940J5.9	TGGTGGCTGGCTCAGAAAAA	test
RP5-940J5.9_chr12+:6538068	RP5-940J5.9	CTGGTGGCTGGCTCAGAAAA	test
RP5-940J5.9_chr12+:6538056	RP5-940J5.9	GTCTGGCGCCCTCTGGTGGC	test
RP5-940J5.9_chr12-:6538053	RP5-940J5.9	TTTCTGAGCCAGCCACCAGA	test
RP5-940J5.9_chr12-:6538082	RP5-940J5.9	AGAAGATGAAAAGAGTTGTC	test
RP5-940J5.9_chr12+:6538052	RP5-940J5.9	CAGGGTCTGGCGCCCTCTGG	test
RP5-940J5.9_chr12-:6538081	RP5-940J5.9	GAAGATGAAAAGAGTTGTCA	test
RP5-940J5.9_chr12+:6538203	RP5-940J5.9	AGCCCCAGCAAGAGCACAAG	test
RP5-940J5.9_chr12-:6538196	RP5-940J5.9	TCTTCCTCTTGTGCTCTTGC	test
RP5-940J5.9_chr12-:6538195	RP5-940J5.9	CTTCCTCTTGTGCTCTTGCT	test
RP5-940J5.9_chr12-:6538194	RP5-940J5.9	TTCCTCTTGTGCTCTTGCTG	test
RP5-940J5.9_chr12-:6538364	RP5-940J5.9	ACAAGTAACTGGTTGAGCAC	test
RP5-940J5.9_chr12-:6538363	RP5-940J5.9	CAAGTAACTGGTTGAGCACA	test
RP5-940J5.9_chr12-:6538323	RP5-940J5.9	ATGACAAGGTGCGGCTCCCT	test
RP5-940J5.9_chr12-:6538283	RP5-940J5.9	GGGTCTACATGGCAACTGTG	test
RP5-940J5.9_chr12-:6538349	RP5-940J5.9	AGCACAGGGTACTTTATTGA	test
RP5-940J5.9_chr12+:6538306	RP5-940J5.9	CATGTAGACCCCTTGAAGAG	test
RP5-940J5.9_chr12+:6538304	RP5-940J5.9	GCCATGTAGACCCCTTGAAG	test
RP5-940J5.9_chr12+:6538305	RP5-940J5.9	CCATGTAGACCCCTTGAAGA	test
RP5-940J5.9_chr12-:6538294	RP5-940J5.9	CCCTCTTCAAGGGGTCTACA	test
RP5-940J5.9_chr12+:6538318	RP5-940J5.9	TTGAAGAGGGGAGGGGCCTA	test
RP5-940J5.9_chr12-:6538304	RP5-940J5.9	TAGGCCCCTCCCCTCTTCAA	test
RP5-940J5.9_chr12+:6538309	RP5-940J5.9	GTAGACCCCTTGAAGAGGGG	test
AC005609.18_chr5-:140875579	AC005609.18	GTGTTTGGCCTCCTCGTAGA	test
AC005609.18_chr5-:140875510	AC005609.18	AAGCGAGAGCAGCAGACGCT	test
AC005609.18_chr5+:140875876	AC005609.18	CCCGCCGGTGTTCAGAGAAA	test
AC005609.18_chr5+:140875875	AC005609.18	ACCCGCCGGTGTTCAGAGAA	test
AC005609.18_chr5-:140875984	AC005609.18	CTCATTTAGACTTAACGCAT	test
AC005609.18_chr5+:140875948	AC005609.18	TCTAGAGGGCGCTTCTGATG	test
AC005609.18_chr5+:140875912	AC005609.18	TGTTTCTGAATCTGCGCCTC	test
AC005609.18_chr5-:140875899	AC005609.18	AGAGGCGCAGATTCAGAAAC	test
AC005609.18_chr5+:140875955	AC005609.18	GGCGCTTCTGATGCGGATAT	test
AC005609.18_chr5-:140875917	AC005609.18	AGAGGAAAATGAGAGTCCAG	test
AC005609.18_chr5+:140875885	AC005609.18	GTTCAGAGAAAGGGAACAAA	test
AC005609.18_chr5-:140875935	AC005609.18	GCATCAGAAGCGCCCTCTAG	test
RP11-359J6.1_chr9-:86414535	RP11-359J6.1	CATCCTCATCGCAGCTTTAT	test
RP11-359J6.1_chr9-:86414536	RP11-359J6.1	TCATCCTCATCGCAGCTTTA	test
RP11-359J6.1_chr9+:86414509	RP11-359J6.1	TCCCAGCAGTTCTTTGTACA	test
RP11-359J6.1_chr9-:86414500	RP11-359J6.1	ATCCCTGTACAAAGAACTGC	test
RP11-359J6.1_chr9-:86414499	RP11-359J6.1	TCCCTGTACAAAGAACTGCT	test
RP11-359J6.1_chr9+:86414508	RP11-359J6.1	ATCCCAGCAGTTCTTTGTAC	test
RP11-359J6.1_chr9-:86414447	RP11-359J6.1	GTGTTGAGAAAAGAGAATTC	test
RP11-359J6.1_chr9+:86414543	RP11-359J6.1	TTTCCCATAAAGCTGCGATG	test
RP11-359J6.1_chr9+:86414515	RP11-359J6.1	CAGTTCTTTGTACAGGGATT	test
CTD-3001H11.2_chr19-:47608080	CTD-3001H11.2	CGTTGCCCTTAGCGAGCGCT	test
CTD-3001H11.2_chr19+:47608116	CTD-3001H11.2	TGAATCCGTGTCCCGCCAGC	test
CTD-3001H11.2_chr19+:47608126	CTD-3001H11.2	TCCCGCCAGCAGGGCGTTTA	test
CTD-3001H11.2_chr19+:47608131	CTD-3001H11.2	CCAGCAGGGCGTTTACGGCC	test
CTD-3001H11.2_chr19+:47608117	CTD-3001H11.2	GAATCCGTGTCCCGCCAGCA	test
CTD-3001H11.2_chr19-:47608117	CTD-3001H11.2	GGCCGTAAACGCCCTGCTGG	test
CTD-3001H11.2_chr19+:47608086	CTD-3001H11.2	GCTCACCAAGCGCTCGCTAA	test
CTD-3001H11.2_chr19-:47608138	CTD-3001H11.2	GGGTCCGTTTCCGCCCCACC	test
CTD-3001H11.2_chr19+:47608085	CTD-3001H11.2	CGCTCACCAAGCGCTCGCTA	test
CTD-3001H11.2_chr19-:47608110	CTD-3001H11.2	AACGCCCTGCTGGCGGGACA	test
CTD-3001H11.2_chr19-:47608116	CTD-3001H11.2	GCCGTAAACGCCCTGCTGGC	test
CTD-3001H11.2_chr19-:47608120	CTD-3001H11.2	CCAGGCCGTAAACGCCCTGC	test
CTD-3001H11.2_chr19-:47607911	CTD-3001H11.2	TGCACACAGTAGGTGAATGC	test
CTD-3001H11.2_chr19-:47607912	CTD-3001H11.2	GTGCACACAGTAGGTGAATG	test
CTD-3001H11.2_chr19-:47607921	CTD-3001H11.2	GAAAAGCTCGTGCACACAGT	test
CTD-3001H11.2_chr19+:47607955	CTD-3001H11.2	TAGGGCACTGGGGAGGCAGA	test
CTD-3001H11.2_chr19-:47608432	CTD-3001H11.2	CGAAAAGATAGCGGGAGTCG	test
CTD-3001H11.2_chr19-:47608376	CTD-3001H11.2	CCCCGGAGGTGGGACCGCGC	test
CTD-3001H11.2_chr19-:47608440	CTD-3001H11.2	CGCAGGTCCGAAAAGATAGC	test
CTD-3001H11.2_chr19+:47608301	CTD-3001H11.2	TGAGTGATCGAGCCACGCCT	test
CTD-3001H11.2_chr19-:47608386	CTD-3001H11.2	GGGGAGTTCCCCCCGGAGGT	test
CTD-3001H11.2_chr19-:47608387	CTD-3001H11.2	AGGGGAGTTCCCCCCGGAGG	test
CTD-3001H11.2_chr19+:47608386	CTD-3001H11.2	TCCGGCGCGGTCCCACCTCC	test
CTD-3001H11.2_chr19+:47608300	CTD-3001H11.2	GTGAGTGATCGAGCCACGCC	test
CTD-3001H11.2_chr19+:47608373	CTD-3001H11.2	TCCAACTCTGGGCTCCGGCG	test
CTD-3001H11.2_chr19-:47608425	CTD-3001H11.2	ATAGCGGGAGTCGAGGATGA	test
CTD-3001H11.2_chr19+:47608387	CTD-3001H11.2	CCGGCGCGGTCCCACCTCCG	test
CTD-3001H11.2_chr19-:47608363	CTD-3001H11.2	ACCGCGCCGGAGCCCAGAGT	test
CTD-3001H11.2_chr19+:47608302	CTD-3001H11.2	GAGTGATCGAGCCACGCCTG	test
CTD-3001H11.2_chr19-:47608352	CTD-3001H11.2	GCCCAGAGTTGGAGCCTGAC	test
CTD-3001H11.2_chr19-:47608441	CTD-3001H11.2	CCGCAGGTCCGAAAAGATAG	test
CTD-3001H11.2_chr19-:47608328	CTD-3001H11.2	TGGAAGGCGGCGGGGACTTC	test
CTD-3001H11.2_chr19-:47608390	CTD-3001H11.2	TGGAGGGGAGTTCCCCCCGG	test
CTD-3001H11.2_chr19+:47608389	CTD-3001H11.2	GGCGCGGTCCCACCTCCGGG	test
CTD-3001H11.2_chr19+:47608388	CTD-3001H11.2	CGGCGCGGTCCCACCTCCGG	test
CTD-3001H11.2_chr19-:47608307	CTD-3001H11.2	GGGTGACAGGCCGGGACCCC	test
CTD-3001H11.2_chr19+:47608361	CTD-3001H11.2	ACCCTGTCAGGCTCCAACTC	test
CTD-3001H11.2_chr19-:47608329	CTD-3001H11.2	GTGGAAGGCGGCGGGGACTT	test
CTD-3001H11.2_chr19+:47608349	CTD-3001H11.2	CCGCCGCCTTCCACCCTGTC	test
LL22NC03-22A12.12_chr22+:22371036	LL22NC03-22A12.12	CTCGGGCTACCAGTTTGGCA	test
LL22NC03-22A12.12_chr22-:22371178	LL22NC03-22A12.12	TGTAGTTAGGTCGTGCTCCT	test
LL22NC03-22A12.12_chr22+:22371095	LL22NC03-22A12.12	ACAACGCTGATCTCAACTGT	test
LL22NC03-22A12.12_chr22+:22371163	LL22NC03-22A12.12	GAGTGAGACAGGAACATGTC	test
LL22NC03-22A12.12_chr22+:22371039	LL22NC03-22A12.12	GGGCTACCAGTTTGGCAAGG	test
LL22NC03-22A12.12_chr22+:22371058	LL22NC03-22A12.12	GAGGCCTTCCCAAGCATCTC	test
LL22NC03-22A12.12_chr22-:22371128	LL22NC03-22A12.12	CCCAGACTGCAGCACTGTTT	test
LL22NC03-22A12.12_chr22+:22371059	LL22NC03-22A12.12	AGGCCTTCCCAAGCATCTCT	test
LL22NC03-22A12.12_chr22+:22371172	LL22NC03-22A12.12	AGGAACATGTCAGGTCTCCT	test
LL22NC03-22A12.12_chr22+:22371141	LL22NC03-22A12.12	CAAACAGTGCTGCAGTCTGG	test
LL22NC03-22A12.12_chr22+:22371140	LL22NC03-22A12.12	CCAAACAGTGCTGCAGTCTG	test
LL22NC03-22A12.12_chr22+:22371066	LL22NC03-22A12.12	CCCAAGCATCTCTGGGCTCC	test
LL22NC03-22A12.12_chr22-:22371118	LL22NC03-22A12.12	AGCACTGTTTGGGCCTCCAG	test
LL22NC03-22A12.12_chr22-:22371051	LL22NC03-22A12.12	GAGCCCAGAGATGCTTGGGA	test
LL22NC03-22A12.12_chr22-:22371055	LL22NC03-22A12.12	CCTGGAGCCCAGAGATGCTT	test
LL22NC03-22A12.12_chr22-:22371056	LL22NC03-22A12.12	GCCTGGAGCCCAGAGATGCT	test
LL22NC03-22A12.12_chr22-:22371119	LL22NC03-22A12.12	CAGCACTGTTTGGGCCTCCA	test
LL22NC03-22A12.12_chr22-:22371117	LL22NC03-22A12.12	GCACTGTTTGGGCCTCCAGG	test
LL22NC03-22A12.12_chr22-:22371120	LL22NC03-22A12.12	GCAGCACTGTTTGGGCCTCC	test
LL22NC03-22A12.12_chr22+:22371138	LL22NC03-22A12.12	GCCCAAACAGTGCTGCAGTC	test
LL22NC03-22A12.12_chr22+:22371139	LL22NC03-22A12.12	CCCAAACAGTGCTGCAGTCT	test
LL22NC03-22A12.12_chr22-:22371129	LL22NC03-22A12.12	CCCCAGACTGCAGCACTGTT	test
RP11-373D23.2_chr2-:28396952	RP11-373D23.2	TCCCGTAGAGGGCACTAGAG	test
RP11-373D23.2_chr2-:28396963	RP11-373D23.2	TCCTAAAAATTTCCCGTAGA	test
RP11-373D23.2_chr2-:28397016	RP11-373D23.2	CTCACCAATTTAACACTCTC	test
RP11-373D23.2_chr2-:28396932	RP11-373D23.2	AGGTATGATTGAGGCTAGCT	test
RP11-373D23.2_chr2-:28396931	RP11-373D23.2	GGTATGATTGAGGCTAGCTT	test
RP11-373D23.2_chr2-:28396913	RP11-373D23.2	TTGGGAATCACAGTCATTTC	test
RP11-373D23.2_chr2+:28397032	RP11-373D23.2	GAGTGTTAAATTGGTGAGTT	test
RP11-373D23.2_chr2-:28396964	RP11-373D23.2	TTCCTAAAAATTTCCCGTAG	test
RP11-373D23.2_chr2-:28396941	RP11-373D23.2	GCACTAGAGAGGTATGATTG	test
RP11-373D23.2_chr2-:28397015	RP11-373D23.2	TCACCAATTTAACACTCTCT	test
RP11-373D23.2_chr2+:28396961	RP11-373D23.2	TACCTCTCTAGTGCCCTCTA	test
RP11-373D23.2_chr2+:28397023	RP11-373D23.2	AGTCCCAGAGAGTGTTAAAT	test
RP11-373D23.2_chr2-:28397010	RP11-373D23.2	AATTTAACACTCTCTGGGAC	test
RP11-373D23.2_chr2-:28396892	RP11-373D23.2	GGTAAAAGTTCTTTGATGTG	test
RP11-373D23.2_chr2+:28396962	RP11-373D23.2	ACCTCTCTAGTGCCCTCTAC	test
RP11-627K11.1_chr12+:31251796	RP11-627K11.1	GGATTTATAGTTCTTTAAAA	test
RP11-627K11.1_chr12+:31251878	RP11-627K11.1	TTTAAGCAATTCTCACTAGA	test
RP11-627K11.1_chr12+:31251831	RP11-627K11.1	AAAAAATGTTACTAGTTCAA	test
RP11-627K11.1_chr12+:31252405	RP11-627K11.1	GTAGGAGCCTCGGTAAGAGT	test
RP11-627K11.1_chr12+:31252533	RP11-627K11.1	GCAGTACCTGTTTACCACGA	test
RP11-627K11.1_chr12-:31252528	RP11-627K11.1	TGGCGGCCATCGTGGTAAAC	test
RP11-627K11.1_chr12+:31252617	RP11-627K11.1	CTTCGCCAGCCGCTTGGGAA	test
RP11-627K11.1_chr12-:31252519	RP11-627K11.1	TCGTGGTAAACAGGTACTGC	test
RP11-627K11.1_chr12-:31252518	RP11-627K11.1	CGTGGTAAACAGGTACTGCT	test
RP11-627K11.1_chr12-:31252611	RP11-627K11.1	AAAAGCCTTTCCCAAGCGGC	test
RP11-627K11.1_chr12-:31252615	RP11-627K11.1	GAAGAAAAGCCTTTCCCAAG	test
RP11-627K11.1_chr12-:31252385	RP11-627K11.1	ACCGAGGCTCCTACCACTTC	test
RP11-627K11.1_chr12-:31252602	RP11-627K11.1	TCCCAAGCGGCTGGCGAAGA	test
RP11-627K11.1_chr12-:31252401	RP11-627K11.1	ATGAACACCAACTCTTACCG	test
RP11-627K11.1_chr12+:31252395	RP11-627K11.1	CCCGGAAGTGGTAGGAGCCT	test
RP11-627K11.1_chr12+:31252612	RP11-627K11.1	GCCGTCTTCGCCAGCCGCTT	test
RP11-627K11.1_chr12+:31252541	RP11-627K11.1	TGTTTACCACGATGGCCGCC	test
RP11-627K11.1_chr12-:31252596	RP11-627K11.1	GCGGCTGGCGAAGACGGCAG	test
RP11-627K11.1_chr12+:31252611	RP11-627K11.1	TGCCGTCTTCGCCAGCCGCT	test
RP11-627K11.1_chr12+:31252434	RP11-627K11.1	TCCGCTTGCGGAGGAAAGCG	test
RP11-627K11.1_chr12-:31252590	RP11-627K11.1	GGCGAAGACGGCAGAGGTGC	test
RP11-627K11.1_chr12-:31252488	RP11-627K11.1	GTGGTGGTCGTACGCTGCGA	test
RP11-627K11.1_chr12-:31252424	RP11-627K11.1	ACCTCGCTTTCCTCCGCAAG	test
RP11-627K11.1_chr12-:31252584	RP11-627K11.1	GACGGCAGAGGTGCAGGTCC	test
RP11-627K11.1_chr12-:31252514	RP11-627K11.1	GTAAACAGGTACTGCTGGGC	test
RP11-627K11.1_chr12-:31252384	RP11-627K11.1	CCGAGGCTCCTACCACTTCC	test
RP11-627K11.1_chr12-:31252473	RP11-627K11.1	TGCGAAGGCATCAACATTTC	test
RP11-627K11.1_chr12+:31252422	RP11-627K11.1	AGTTGGTGTTCATCCGCTTG	test
RP11-627K11.1_chr12+:31252544	RP11-627K11.1	TTACCACGATGGCCGCCAGG	test
RP11-644N4.1_chr7+:135704507	RP11-644N4.1	GCAGAGTGAGGGTGCGGTTA	test
RP11-644N4.1_chr7+:135704511	RP11-644N4.1	AGTGAGGGTGCGGTTAGGGG	test
RP11-644N4.1_chr7+:135704508	RP11-644N4.1	CAGAGTGAGGGTGCGGTTAG	test
RP11-644N4.1_chr7+:135704496	RP11-644N4.1	AGTCAGAAGCAGCAGAGTGA	test
RP11-644N4.1_chr7+:135704523	RP11-644N4.1	GTTAGGGGAGGAGGAGAAGA	test
RP11-644N4.1_chr7+:135704506	RP11-644N4.1	AGCAGAGTGAGGGTGCGGTT	test
RP11-644N4.1_chr7+:135704495	RP11-644N4.1	AAGTCAGAAGCAGCAGAGTG	test
RP11-644N4.1_chr7+:135704501	RP11-644N4.1	GAAGCAGCAGAGTGAGGGTG	test
RP11-644N4.1_chr7+:135704514	RP11-644N4.1	GAGGGTGCGGTTAGGGGAGG	test
RP11-644N4.1_chr7+:135704522	RP11-644N4.1	GGTTAGGGGAGGAGGAGAAG	test
RP11-644N4.1_chr7+:135704313	RP11-644N4.1	CCTGCAGAGGGCGCCATAAT	test
RP11-644N4.1_chr7-:135704302	RP11-644N4.1	CCCATTATGGCGCCCTCTGC	test
RP11-644N4.1_chr7-:135704337	RP11-644N4.1	CTGTGGGGCAACTGCCTTCA	test
RP11-644N4.1_chr7+:135704312	RP11-644N4.1	CCCTGCAGAGGGCGCCATAA	test
RP11-644N4.1_chr7-:135704301	RP11-644N4.1	CCATTATGGCGCCCTCTGCA	test
RP11-644N4.1_chr7+:135704334	RP11-644N4.1	GGATGCTCCAAAGACCCTGA	test
RP11-644N4.1_chr7-:135704330	RP11-644N4.1	GCAACTGCCTTCAGGGTCTT	test
RP11-644N4.1_chr7-:135704315	RP11-644N4.1	GTCTTTGGAGCATCCCATTA	test
RP11-644N4.1_chr7-:135704338	RP11-644N4.1	TCTGTGGGGCAACTGCCTTC	test
RP11-644N4.1_chr7-:135704294	RP11-644N4.1	GGCGCCCTCTGCAGGGCCTC	test
RP11-644N4.1_chr7+:135704289	RP11-644N4.1	AGGCCCTGCCATCAGGCCTG	test
RP11-644N4.1_chr7+:135704300	RP11-644N4.1	TCAGGCCTGAGGCCCTGCAG	test
DKFZp779M0652_chr11+:45771454	DKFZp779M0652	CGGCCCGCGGACGCTTAGAG	test
DKFZp779M0652_chr11-:45771447	DKFZp779M0652	CTCCCCTCTCTAAGCGTCCG	test
DKFZp779M0652_chr11-:45771370	DKFZp779M0652	ATCACACGCTCAGCGAGAAA	test
DKFZp779M0652_chr11+:45771456	DKFZp779M0652	GCCCGCGGACGCTTAGAGAG	test
DKFZp779M0652_chr11-:45771364	DKFZp779M0652	CGCTCAGCGAGAAAGGGTCG	test
DKFZp779M0652_chr11-:45771371	DKFZp779M0652	AATCACACGCTCAGCGAGAA	test
DKFZp779M0652_chr11+:45771455	DKFZp779M0652	GGCCCGCGGACGCTTAGAGA	test
DKFZp779M0652_chr11+:45771434	DKFZp779M0652	AGCCAGAATTCAGGCGTTCC	test
DKFZp779M0652_chr11+:45771441	DKFZp779M0652	ATTCAGGCGTTCCCGGCCCG	test
DKFZp779M0652_chr11-:45771441	DKFZp779M0652	TCTCTAAGCGTCCGCGGGCC	test
DKFZp779M0652_chr11-:45771446	DKFZp779M0652	TCCCCTCTCTAAGCGTCCGC	test
DKFZp779M0652_chr11-:45771335	DKFZp779M0652	GGTCTGTGCTAATTTCGGAG	test
DKFZp779M0652_chr11-:45771404	DKFZp779M0652	GGCTCCCGAGCACCTTCTTG	test
DKFZp779M0652_chr11+:45771464	DKFZp779M0652	ACGCTTAGAGAGGGGAGCTT	test
DKFZp779M0652_chr11+:45771472	DKFZp779M0652	AGAGGGGAGCTTCGGAGTTA	test
DKFZp779M0652_chr11+:45771323	DKFZp779M0652	GTGATAACCTTCCAATCCAC	test
DKFZp779M0652_chr11-:45771425	DKFZp779M0652	GGCCGGGAACGCCTGAATTC	test
DKFZp779M0652_chr11-:45771363	DKFZp779M0652	GCTCAGCGAGAAAGGGTCGT	test
DKFZp779M0652_chr11-:45771328	DKFZp779M0652	GCTAATTTCGGAGAGGCCAG	test
DKFZp779M0652_chr11-:45771394	DKFZp779M0652	CACCTTCTTGTGGACAGTTT	test
DKFZp779M0652_chr11+:45771411	DKFZp779M0652	CTGTCCACAAGAAGGTGCTC	test
DKFZp779M0652_chr11+:45771425	DKFZp779M0652	GTGCTCGGGAGCCAGAATTC	test
DKFZp779M0652_chr11-:45772274	DKFZp779M0652	TCACTCATCGGAATCCGGGT	test
DKFZp779M0652_chr11+:45772288	DKFZp779M0652	ACCCGGATTCCGATGAGTGA	test
DKFZp779M0652_chr11+:45772287	DKFZp779M0652	CACCCGGATTCCGATGAGTG	test
DKFZp779M0652_chr11-:45772259	DKFZp779M0652	CGGGTGGGATGAATCCTCGG	test
DKFZp779M0652_chr11-:45772275	DKFZp779M0652	CTCACTCATCGGAATCCGGG	test
DKFZp779M0652_chr11-:45772262	DKFZp779M0652	ATCCGGGTGGGATGAATCCT	test
DKFZp779M0652_chr11-:45772279	DKFZp779M0652	GTCCCTCACTCATCGGAATC	test
DKFZp779M0652_chr11-:45772286	DKFZp779M0652	AGAGAGGGTCCCTCACTCAT	test
DKFZp779M0652_chr11+:45772256	DKFZp779M0652	GTGGAGGGACCTTGCCTCCG	test
DKFZp779M0652_chr11+:45772271	DKFZp779M0652	CTCCGAGGATTCATCCCACC	test
DKFZp779M0652_chr11-:45772278	DKFZp779M0652	TCCCTCACTCATCGGAATCC	test
DKFZp779M0652_chr11+:45772299	DKFZp779M0652	GATGAGTGAGGGACCCTCTC	test
DKFZp779M0652_chr11-:45772047	DKFZp779M0652	TTCCGGTCGCCAGCGGTGCC	test
DKFZp779M0652_chr11+:45772056	DKFZp779M0652	ACCCGGGCACCGCTGGCGAC	test
DKFZp779M0652_chr11+:45772049	DKFZp779M0652	ACTGCTCACCCGGGCACCGC	test
DKFZp779M0652_chr11-:45772127	DKFZp779M0652	CCATGGGGACCCAGCGCCGC	test
DKFZp779M0652_chr11+:45772039	DKFZp779M0652	GTGAGGGTGAACTGCTCACC	test
DKFZp779M0652_chr11-:45772046	DKFZp779M0652	TCCGGTCGCCAGCGGTGCCC	test
DKFZp779M0652_chr11-:45772054	DKFZp779M0652	AGCTGGGTTCCGGTCGCCAG	test
DKFZp779M0652_chr11+:45772128	DKFZp779M0652	GTGCTGCCCTCCAGCGGCGC	test
DKFZp779M0652_chr11-:45772077	DKFZp779M0652	CGCCTCTCCCGGAGCCCGGA	test
DKFZp779M0652_chr11-:45772123	DKFZp779M0652	GGGGACCCAGCGCCGCTGGA	test
DKFZp779M0652_chr11-:45772124	DKFZp779M0652	TGGGGACCCAGCGCCGCTGG	test
DKFZp779M0652_chr11+:45772073	DKFZp779M0652	GACCGGAACCCAGCTCCCTC	test
DKFZp779M0652_chr11-:45772171	DKFZp779M0652	GCGGGAGAAGAAAAGGCCCC	test
DKFZp779M0652_chr11-:45772143	DKFZp779M0652	AGGAGAAAGCCAGGTGCCAT	test
DKFZp779M0652_chr11-:45772081	DKFZp779M0652	AGGCCGCCTCTCCCGGAGCC	test
DKFZp779M0652_chr11+:45772129	DKFZp779M0652	TGCTGCCCTCCAGCGGCGCT	test
DKFZp779M0652_chr11-:45772088	DKFZp779M0652	ACAGCTGAGGCCGCCTCTCC	test
DKFZp779M0652_chr11-:45772078	DKFZp779M0652	CCGCCTCTCCCGGAGCCCGG	test
DKFZp779M0652_chr11+:45772145	DKFZp779M0652	CGCTGGGTCCCCATGGCACC	test
DKFZp779M0652_chr11+:45772086	DKFZp779M0652	CTCCCTCCGGGCTCCGGGAG	test
DKFZp779M0652_chr11+:45772138	DKFZp779M0652	CCAGCGGCGCTGGGTCCCCA	test
DKFZp779M0652_chr11-:45772170	DKFZp779M0652	CGGGAGAAGAAAAGGCCCCT	test
DKFZp779M0652_chr11+:45772106	DKFZp779M0652	AGGCGGCCTCAGCTGTGTGC	test
RP5-1154L15.1_chr12+:591415	RP5-1154L15.1	TGCACACACGTCAACAACCT	test
RP5-1154L15.1_chr12-:591235	RP5-1154L15.1	CAGTACCTAAACTGCCCTGA	test
RP5-1154L15.1_chr12-:591210	RP5-1154L15.1	GGTTCACACAGACCACATGA	test
RP5-1154L15.1_chr12-:591231	RP5-1154L15.1	ACCTAAACTGCCCTGATGGT	test
RP5-1154L15.1_chr12-:591398	RP5-1154L15.1	TTGTTGACGTGTGTGCAGCT	test
RP5-1154L15.1_chr12+:591161	RP5-1154L15.1	ATGACAGTCCCTAGGTTCTC	test
RP5-1154L15.1_chr12-:591273	RP5-1154L15.1	GCTTGAACCCTGCTAAGGAC	test
RP5-1154L15.1_chr12+:591250	RP5-1154L15.1	CAGGGCAGTTTAGGTACTGC	test
RP5-1154L15.1_chr12-:591309	RP5-1154L15.1	TGCCGGGAATTGTAAGATCT	test
RP5-1154L15.1_chr12-:591278	RP5-1154L15.1	CCGCTGCTTGAACCCTGCTA	test
RP5-1154L15.1_chr12+:591259	RP5-1154L15.1	TTAGGTACTGCAGGGTGTTG	test
RP5-1154L15.1_chr12+:591231	RP5-1154L15.1	GTCTGTGTGAACCAACCATC	test
RP5-1154L15.1_chr12+:591414	RP5-1154L15.1	CTGCACACACGTCAACAACC	test
RP5-1154L15.1_chr12+:591416	RP5-1154L15.1	GCACACACGTCAACAACCTG	test
RP5-1154L15.1_chr12+:591439	RP5-1154L15.1	CTGTGCGCTCTCCTGATGCA	test
RP5-1154L15.1_chr12+:591276	RP5-1154L15.1	TTGGGGCCCCAGTCCTTAGC	test
RP5-1154L15.1_chr12+:591318	RP5-1154L15.1	TGCCTAGATCTTACAATTCC	test
RP5-1154L15.1_chr12-:591385	RP5-1154L15.1	TGCAGCTGGGCATGAGTGAC	test
RP5-1154L15.1_chr12+:591258	RP5-1154L15.1	TTTAGGTACTGCAGGGTGTT	test
RP5-1154L15.1_chr12-:591271	RP5-1154L15.1	TTGAACCCTGCTAAGGACTG	test
RP5-1154L15.1_chr12-:591272	RP5-1154L15.1	CTTGAACCCTGCTAAGGACT	test
RP5-1154L15.1_chr12-:591439	RP5-1154L15.1	AGCAGAAAGGACCTTGCATC	test
RP5-1154L15.1_chr12+:591363	RP5-1154L15.1	CTTGCTGAGAGCACTTTGGT	test
RP5-1154L15.1_chr12+:591232	RP5-1154L15.1	TCTGTGTGAACCAACCATCA	test
RP5-1154L15.1_chr12+:591359	RP5-1154L15.1	CCTGCTTGCTGAGAGCACTT	test
RP5-1154L15.1_chr12+:591257	RP5-1154L15.1	GTTTAGGTACTGCAGGGTGT	test
RP5-1154L15.1_chr12+:591277	RP5-1154L15.1	TGGGGCCCCAGTCCTTAGCA	test
RP5-1154L15.1_chr12+:591290	RP5-1154L15.1	CTTAGCAGGGTTCAAGCAGC	test
RP5-1154L15.1_chr12-:591203	RP5-1154L15.1	ACAGACCACATGATGGTGAG	test
RP5-1154L15.1_chr12-:591452	RP5-1154L15.1	AGTAGTCATGACTAGCAGAA	test
RP5-1154L15.1_chr12+:591209	RP5-1154L15.1	GAGGGCCTCTCACCATCATG	test
RP5-1154L15.1_chr12+:591191	RP5-1154L15.1	TTCTGGATTCAGTGCTGTGA	test
RP5-1154L15.1_chr12+:591251	RP5-1154L15.1	AGGGCAGTTTAGGTACTGCA	test
RP5-1154L15.1_chr12-:591399	RP5-1154L15.1	GTTGTTGACGTGTGTGCAGC	test
RP5-1154L15.1_chr12-:591421	RP5-1154L15.1	TCAGGAGAGCGCACAGCCCC	test
RP5-1154L15.1_chr12+:591241	RP5-1154L15.1	ACCAACCATCAGGGCAGTTT	test
RP5-1154L15.1_chr12+:591289	RP5-1154L15.1	CCTTAGCAGGGTTCAAGCAG	test
RP5-1154L15.1_chr12-:591348	RP5-1154L15.1	CCAAAGTGCTCTCAGCAAGC	test
RP5-1154L15.1_chr12-:591384	RP5-1154L15.1	GCAGCTGGGCATGAGTGACA	test
RP5-1154L15.1_chr12+:591362	RP5-1154L15.1	GCTTGCTGAGAGCACTTTGG	test
RP5-1154L15.1_chr12-:591304	RP5-1154L15.1	GGAATTGTAAGATCTAGGCA	test
RP5-1154L15.1_chr12+:591174	RP5-1154L15.1	GGTTCTCTGGCTCCTGTTTC	test
RP5-1154L15.1_chr12+:591190	RP5-1154L15.1	TTTCTGGATTCAGTGCTGTG	test
RP5-1154L15.1_chr12-:591345	RP5-1154L15.1	AAGTGCTCTCAGCAAGCAGG	test
RP5-1154L15.1_chr12-:591326	RP5-1154L15.1	GAGGTGAAGGGAGATGCTGC	test
RP5-1154L15.1_chr12+:591505	RP5-1154L15.1	TGAGTGCTGATTCACCTACT	test
RP5-1154L15.1_chr12+:591509	RP5-1154L15.1	TGCTGATTCACCTACTAGGT	test
RP5-1154L15.1_chr12-:591487	RP5-1154L15.1	GGTGAATCAGCACTCAGTCC	test
RP5-1154L15.1_chr12-:591508	RP5-1154L15.1	AACCCTCTGACCAACCTAGT	test
RP5-1154L15.1_chr12+:591480	RP5-1154L15.1	ACTACTAAGACCTGCTGCCC	test
RP5-1154L15.1_chr12+:591517	RP5-1154L15.1	CACCTACTAGGTTGGTCAGA	test
RP5-1154L15.1_chr12+:591516	RP5-1154L15.1	TCACCTACTAGGTTGGTCAG	test
RP5-1154L15.1_chr12-:591486	RP5-1154L15.1	GTGAATCAGCACTCAGTCCT	test
RP5-1154L15.1_chr12-:591479	RP5-1154L15.1	AGCACTCAGTCCTGGGCAGC	test
RP5-1154L15.1_chr12-:591325	RP5-1154L15.1	AGGTGAAGGGAGATGCTGCC	test
RP5-1154L15.1_chr12-:591338	RP5-1154L15.1	CTCAGCAAGCAGGAGGTGAA	test
FAM32B_chr22+:17214171	FAM32B	AATAGCCGCCTGCCCCCAGT	test
FAM32B_chr22+:17214190	FAM32B	TAGGGAGCAGCATCGAGGGT	test
FAM32B_chr22-:17214142	FAM32B	CTATTTCGTCCAGCTGACTC	test
FAM32B_chr22+:17214207	FAM32B	GGTTGGCAAAAGGCCATGCT	test
FAM32B_chr22-:17214141	FAM32B	TATTTCGTCCAGCTGACTCT	test
FAM32B_chr22+:17214208	FAM32B	GTTGGCAAAAGGCCATGCTG	test
FAM32B_chr22+:17214144	FAM32B	ATTACATTCCCAGAGTCAGC	test
FAM32B_chr22-:17214209	FAM32B	AAACACACACAACCCCAGCA	test
FAM32B_chr22+:17214186	FAM32B	CCAGTAGGGAGCAGCATCGA	test
FAM32B_chr22-:17214175	FAM32B	CCCTCGATGCTGCTCCCTAC	test
FAM32B_chr22+:17214197	FAM32B	CAGCATCGAGGGTTGGCAAA	test
FAM32B_chr22-:17214173	FAM32B	CTCGATGCTGCTCCCTACTG	test
FAM32B_chr22+:17214185	FAM32B	CCCAGTAGGGAGCAGCATCG	test
FAM32B_chr22-:17214168	FAM32B	TGCTGCTCCCTACTGGGGGC	test
FAM32B_chr22-:17214172	FAM32B	TCGATGCTGCTCCCTACTGG	test
FAM32B_chr22-:17214165	FAM32B	TGCTCCCTACTGGGGGCAGG	test
FAM32B_chr22+:17214206	FAM32B	GGGTTGGCAAAAGGCCATGC	test
FAM32B_chr22-:17214174	FAM32B	CCTCGATGCTGCTCCCTACT	test
FAM32B_chr22+:17214172	FAM32B	ATAGCCGCCTGCCCCCAGTA	test
FAM32B_chr22-:17214232	FAM32B	ATGTTTCTAGAATATACCAA	test
FAM32B_chr22+:17214106	FAM32B	GGAGGACTTCAACAGACACC	test
FAM32B_chr22-:17214388	FAM32B	ACTTTCCATCCGAACTAAAA	test
FAM32B_chr22-:17214389	FAM32B	AACTTTCCATCCGAACTAAA	test
FAM32B_chr22-:17214344	FAM32B	AGAAACCTAAACTGAGTACA	test
FAM32B_chr22+:17214358	FAM32B	TGTACTCAGTTTAGGTTTCT	test
FAM32B_chr22+:17214350	FAM32B	ATTGTCCTTGTACTCAGTTT	test
RPL35P4_chr7-:27269681	RPL35P4	GGCTCGAGACCTGCACGAGA	test
RPL35P4_chr7-:27269678	RPL35P4	TCGAGACCTGCACGAGAAGG	test
RPL35P4_chr7-:27269714	RPL35P4	GGCGGTGGCCTATGCAGCAA	test
RPL35P4_chr7+:27269702	RPL35P4	CAGGTCTCGAGCCTTGATCT	test
RPL35P4_chr7+:27269588	RPL35P4	GACTCAAATCTTAGAGAGCT	test
RPL35P4_chr7-:27269729	RPL35P4	CTCAGAGCAGGCAGCGGCGG	test
RPL35P4_chr7+:27269717	RPL35P4	GATCTTGGCCATTGCTGCAT	test
RPL35P4_chr7-:27269611	RPL35P4	CTGCACGTCGCCAAAGTGAC	test
RPL35P4_chr7-:27269660	RPL35P4	GGAGGAGCTGCTGAAACAGT	test
RPL35P4_chr7+:27269627	RPL35P4	CACTTTGGCGACGTGCAGCT	test
RPL35P4_chr7+:27269626	RPL35P4	TCACTTTGGCGACGTGCAGC	test
RPL35P4_chr7+:27269683	RPL35P4	GCAGCTCCTCCTTCTCGTGC	test
RPL35P4_chr7+:27269591	RPL35P4	TCAAATCTTAGAGAGCTTGG	test
RPL35P4_chr7-:27269648	RPL35P4	GAAACAGTTGGATGACCTGA	test
RPL35P4_chr7-:27269645	RPL35P4	ACAGTTGGATGACCTGAAGG	test
RPL35P4_chr7+:27269612	RPL35P4	GGCCGCGCCGCCTGTCACTT	test
RPL35P4_chr7-:27269608	RPL35P4	CACGTCGCCAAAGTGACAGG	test
KRT8P30_chr2-:218953562	KRT8P30	ATGGGGGCCTCACAAGCCCT	test
KRT8P30_chr2+:218953557	KRT8P30	CAGGCTGTAGCTGAGGCCAA	test
KRT8P30_chr2+:218953566	KRT8P30	GCTGAGGCCAAGGGCTTGTG	test
KRT8P30_chr2-:218953544	KRT8P30	CTTGGCCTCAGCTACAGCCT	test
KRT8P30_chr2-:218953611	KRT8P30	ATCCATAAGAAGACCACCAG	test
KRT8P30_chr2-:218953581	KRT8P30	GGTGGTCTGAGCTCAGCCTA	test
KRT8P30_chr2-:218953579	KRT8P30	TGGTCTGAGCTCAGCCTATG	test
KRT8P30_chr2-:218953580	KRT8P30	GTGGTCTGAGCTCAGCCTAT	test
KRT8P30_chr2-:218953545	KRT8P30	CCTTGGCCTCAGCTACAGCC	test
KRT8P30_chr2-:218953578	KRT8P30	GGTCTGAGCTCAGCCTATGG	test
KRT8P30_chr2-:218953711	KRT8P30	TGAGTACCAGAAGCTGGCCC	test
KRT8P30_chr2-:218953717	KRT8P30	GCTGGGTGAGTACCAGAAGC	test
KRT8P30_chr2-:218953657	KRT8P30	GGAGGGCGAGGAGAGCCGTC	test
KRT8P30_chr2-:218953650	KRT8P30	GAGGAGAGCCGTCTGGAGTC	test
KRT8P30_chr2+:218953653	KRT8P30	TCTGCATCCCAGACTCCAGA	test
KRT8P30_chr2-:218953649	KRT8P30	AGGAGAGCCGTCTGGAGTCT	test
KRT8P30_chr2+:218953716	KRT8P30	CGATGTCCAGGGCCAGCTTC	test
KRT8P30_chr2-:218953734	KRT8P30	GCAGGACATGGCACGCAGCT	test
KRT8P30_chr2-:218953824	KRT8P30	CATCGCAGATGCCGAGCAGT	test
KRT8P30_chr2-:218953825	KRT8P30	CCATCGCAGATGCCGAGCAG	test
KRT8P30_chr2-:218953735	KRT8P30	AGCAGGACATGGCACGCAGC	test
KRT8P30_chr2+:218953791	KRT8P30	CAGCTCAGACAGCTTGGTGT	test
KRT8P30_chr2-:218953822	KRT8P30	TCGCAGATGCCGAGCAGTGG	test
KRT8P30_chr2+:218953620	KRT8P30	AGCCACTGGTGGTCTTCTTA	test
KRT8P30_chr2-:218953779	KRT8P30	CAACACCAAGCTGTCTGAGC	test
KRT8P30_chr2-:218953821	KRT8P30	CGCAGATGCCGAGCAGTGGG	test
KRT8P30_chr2+:218953824	KRT8P30	GGCCAGCTCCCCCCACTGCT	test
KRT8P30_chr2+:218953749	KRT8P30	GCTGCGTGCCATGTCCTGCT	test
KRT8P30_chr2-:218953815	KRT8P30	TGCCGAGCAGTGGGGGGAGC	test
KRT8P30_chr2+:218953764	KRT8P30	CTGCTTGGCCCGCTGCATGG	test
KRT8P30_chr2-:218953762	KRT8P30	AGCTGGAGGCCGCCATGCAG	test
KRT8P30_chr2-:218953752	KRT8P30	CGCCATGCAGCGGGCCAAGC	test
KRT8P30_chr2-:218953761	KRT8P30	GCTGGAGGCCGCCATGCAGC	test
KRT8P30_chr2+:218953859	KRT8P30	CGGCCTCCAGGGAAGCCCCC	test
KRT8P30_chr2-:218953823	KRT8P30	ATCGCAGATGCCGAGCAGTG	test
KRT8P30_chr2-:218953881	KRT8P30	CAGGCTCCAGGCTGAGACTG	test
KRT8P30_chr2-:218953880	KRT8P30	AGGCTCCAGGCTGAGACTGA	test
KRT8P30_chr2-:218953776	KRT8P30	CACCAAGCTGTCTGAGCTGG	test
KRT8P30_chr2+:218953836	KRT8P30	CCACTGCTCGGCATCTGCGA	test
RP11-571F15.2_chr9-:34191840	RP11-571F15.2	ACGTGAATTCTGTGTCCAAA	test
RP11-571F15.2_chr9-:34191830	RP11-571F15.2	TGTGTCCAAACGGCCTCAGC	test
RP11-571F15.2_chr9+:34191836	RP11-571F15.2	ATCTTCCTGCTGAGGCCGTT	test
RP11-571F15.2_chr9-:34191792	RP11-571F15.2	TTTGGCATGTCTGTTTCCAT	test
RP11-571F15.2_chr9-:34191615	RP11-571F15.2	TTGTGTGCTCTCTTTGATTC	test
RP11-571F15.2_chr9-:34191586	RP11-571F15.2	CACTTACAGCCAACAAAAAA	test
RP11-571F15.2_chr9-:34191580	RP11-571F15.2	CAGCCAACAAAAAATGGCCT	test
RP11-571F15.2_chr9+:34191812	RP11-571F15.2	ACAGACATGCCAAATTCCAA	test
RP11-571F15.2_chr9-:34191793	RP11-571F15.2	ATTTGGCATGTCTGTTTCCA	test
RP11-571F15.2_chr9-:34191762	RP11-571F15.2	TATCTTTCCACAGATTACTC	test
RP11-571F15.2_chr9+:34191787	RP11-571F15.2	GGAAAGATAATTTGCGCCCA	test
RP11-571F15.2_chr9-:34191817	RP11-571F15.2	CCTCAGCAGGAAGATTCCTT	test
RP11-571F15.2_chr9-:34191664	RP11-571F15.2	ACAGAATTCAGCTTCATCTC	test
RP11-571F15.2_chr9+:34191828	RP11-571F15.2	CCAAAGGAATCTTCCTGCTG	test
RP11-571F15.2_chr9-:34191810	RP11-571F15.2	AGGAAGATTCCTTTGGAATT	test
RP11-571F15.2_chr9+:34191680	RP11-571F15.2	GATGAAGCTGAATTCTGTTT	test
RP11-571F15.2_chr9+:34191679	RP11-571F15.2	AGATGAAGCTGAATTCTGTT	test
RP11-571F15.2_chr9+:34191561	RP11-571F15.2	AAAAGGCAAATATGTCTGGA	test
RP11-571F15.2_chr9+:34191567	RP11-571F15.2	CAAATATGTCTGGAAGGCTG	test
RP11-277J24.1_chr12+:7860291	RP11-277J24.1	GAACATTTAGGGAAAATATC	test
RP11-277J24.1_chr12+:7860305	RP11-277J24.1	AATATCAGGCAGAAGATAAA	test
RP11-277J24.1_chr12+:7860269	RP11-277J24.1	TCAGAGAAGAGGATAAATTT	test
RP11-277J24.1_chr12+:7860280	RP11-277J24.1	GATAAATTTGGGAACATTTA	test
RP11-277J24.1_chr12+:7860268	RP11-277J24.1	CTCAGAGAAGAGGATAAATT	test
RP11-277J24.1_chr12-:7860256	RP11-277J24.1	CAAATTTATCCTCTTCTCTG	test
RP11-277J24.1_chr12+:7860258	RP11-277J24.1	AAGCAAAGCCCTCAGAGAAG	test
RP11-277J24.1_chr12-:7860240	RP11-277J24.1	TCTGAGGGCTTTGCTTCTTC	test
RP11-277J24.1_chr12+:7860310	RP11-277J24.1	CAGGCAGAAGATAAAAGGAA	test
RP11-277J24.1_chr12-:7860255	RP11-277J24.1	AAATTTATCCTCTTCTCTGA	test
RP11-277J24.1_chr12+:7860279	RP11-277J24.1	GGATAAATTTGGGAACATTT	test
RP11-277J24.1_chr12-:7860088	RP11-277J24.1	GGCCAACTGCTAACCAGCTC	test
RP11-277J24.1_chr12-:7860077	RP11-277J24.1	AACCAGCTCTGGTAATACCA	test
RP11-277J24.1_chr12+:7860071	RP11-277J24.1	TGTGGTGCTAGTAACATCCT	test
RP11-277J24.1_chr12+:7860097	RP11-277J24.1	TACCAGAGCTGGTTAGCAGT	test
RP11-277J24.1_chr12+:7860105	RP11-277J24.1	CTGGTTAGCAGTTGGCCACC	test
RP11-277J24.1_chr12+:7860086	RP11-277J24.1	ATCCTTGGTATTACCAGAGC	test
RP11-277J24.1_chr12-:7860109	RP11-277J24.1	AGATATACACTGCCACCTGG	test
RP11-277J24.1_chr12-:7860112	RP11-277J24.1	CAAAGATATACACTGCCACC	test
RP11-277J24.1_chr12+:7860144	RP11-277J24.1	TGCGCCATCCCTCCCAGTAC	test
RP11-277J24.1_chr12-:7860142	RP11-277J24.1	TCTCCAGGGCCAGTACTGGG	test
RP11-277J24.1_chr12-:7860137	RP11-277J24.1	AGGGCCAGTACTGGGAGGGA	test
RP11-277J24.1_chr12+:7860108	RP11-277J24.1	GTTAGCAGTTGGCCACCAGG	test
RP11-1072A3.4_chr16-:30957173	RP11-1072A3.4	CGAGGACTCACCCGGATGGG	test
RP11-1072A3.4_chr16+:30957188	RP11-1072A3.4	CCATCCGGGTGAGTCCTCGT	test
RP11-1072A3.4_chr16-:30957201	RP11-1072A3.4	GACTAGGGGGCGCCTCCGGG	test
RP11-1072A3.4_chr16-:30957176	RP11-1072A3.4	CCACGAGGACTCACCCGGAT	test
RP11-1072A3.4_chr16+:30957187	RP11-1072A3.4	CCCATCCGGGTGAGTCCTCG	test
RP11-1072A3.4_chr16-:30957172	RP11-1072A3.4	GAGGACTCACCCGGATGGGA	test
RP11-1072A3.4_chr16-:30957177	RP11-1072A3.4	CCCACGAGGACTCACCCGGA	test
RP11-1072A3.4_chr16-:30957125	RP11-1072A3.4	ACCGTGAGCGGTGACTCAGG	test
RP11-1072A3.4_chr16+:30957135	RP11-1072A3.4	ACCGCCTGAGTCACCGCTCA	test
RP11-1072A3.4_chr16-:30957181	RP11-1072A3.4	AGGACCCACGAGGACTCACC	test
RP11-1072A3.4_chr16-:30957137	RP11-1072A3.4	TGGAAAAACACAACCGTGAG	test
RP11-1072A3.4_chr16-:30957128	RP11-1072A3.4	ACAACCGTGAGCGGTGACTC	test
RP11-1072A3.4_chr16+:30956996	RP11-1072A3.4	GGTTTGAGTACGGCAAAGTA	test
RP11-1072A3.4_chr16+:30956995	RP11-1072A3.4	GGGTTTGAGTACGGCAAAGT	test
RP11-1072A3.4_chr16+:30956974	RP11-1072A3.4	CTGGATTTAACCACTAATGG	test
RP11-1072A3.4_chr16+:30956971	RP11-1072A3.4	TCCCTGGATTTAACCACTAA	test
RP11-1072A3.4_chr16+:30956975	RP11-1072A3.4	TGGATTTAACCACTAATGGT	test
RP11-1072A3.4_chr16+:30957009	RP11-1072A3.4	CAAAGTAGGGCACCTTCTAC	test
RP11-1072A3.4_chr16-:30956973	RP11-1072A3.4	GTACTCAAACCCACCATTAG	test
RP11-1072A3.4_chr16+:30956986	RP11-1072A3.4	ACTAATGGTGGGTTTGAGTA	test
RP11-1072A3.4_chr16-:30957031	RP11-1072A3.4	AGGATGCCCATTTGCCAGAT	test
RP11-1072A3.4_chr16-:30957032	RP11-1072A3.4	TAGGATGCCCATTTGCCAGA	test
RP11-1072A3.4_chr16-:30957010	RP11-1072A3.4	GGGAGAGTGAGGCCTGTAGA	test
RP11-1072A3.4_chr16+:30957028	RP11-1072A3.4	CAGGCCTCACTCTCCCCATC	test
HIST1H2APS1_chr6+:25732589	HIST1H2APS1	CACGCTAGCGTACCTGCCGG	test
HIST1H2APS1_chr6+:25732641	HIST1H2APS1	GAGTTGGCGGGCAACGCCGT	test
HIST1H2APS1_chr6+:25732595	HIST1H2APS1	AGCGTACCTGCCGGCGGTTC	test
HIST1H2APS1_chr6+:25732586	HIST1H2APS1	CTGCACGCTAGCGTACCTGC	test
HIST1H2APS1_chr6-:25732732	HIST1H2APS1	ACCCTAAGCCATTGTCACTC	test
HIST1H2APS1_chr6-:25732594	HIST1H2APS1	GCCAGGTACTCCAGAACCGC	test
HIST1H2APS1_chr6+:25732629	HIST1H2APS1	TCCGACACCCTGGAGTTGGC	test
HIST1H2APS1_chr6-:25732616	HIST1H2APS1	CGCCAACTCCAGGGTGTCGG	test
HIST1H2APS1_chr6-:25732625	HIST1H2APS1	GGCGTTGCCCGCCAACTCCA	test
HIST1H2APS1_chr6-:25732590	HIST1H2APS1	GGTACTCCAGAACCGCCGGC	test
HIST1H2APS1_chr6+:25732619	HIST1H2APS1	GTACCTGGCCTCCGACACCC	test
HIST1H2APS1_chr6+:25732625	HIST1H2APS1	GGCCTCCGACACCCTGGAGT	test
HIST1H2APS1_chr6+:25732604	HIST1H2APS1	GCCGGCGGTTCTGGAGTACC	test
HIST1H2APS1_chr6-:25732646	HIST1H2APS1	GGGTCTTCTTCTTGTTCCGA	test
HIST1H2APS1_chr6-:25732611	HIST1H2APS1	ACTCCAGGGTGTCGGAGGCC	test
HIST1H2APS1_chr6-:25732619	HIST1H2APS1	GCCCGCCAACTCCAGGGTGT	test
HIST1H2APS1_chr6+:25732628	HIST1H2APS1	CTCCGACACCCTGGAGTTGG	test
HIST1H2APS1_chr6-:25732700	HIST1H2APS1	TGTCGAGCTCCTTGTCGTTG	test
HIST1H2APS1_chr6+:25732720	HIST1H2APS1	CAAGGAGCTCGACAAGCTGC	test
HIST1H2APS1_chr6+:25732702	HIST1H2APS1	GCTGGCCATCCGCAACGACA	test
HIST1H2APS1_chr6-:25732696	HIST1H2APS1	GAGCTCCTTGTCGTTGCGGA	test
HIST1H2APS1_chr6-:25732626	HIST1H2APS1	CGGCGTTGCCCGCCAACTCC	test
ATP6V1G1P6_chr5+:78222260	ATP6V1G1P6	GAGACCTGCAGTGAAAGAAC	test
ATP6V1G1P6_chr5+:78222263	ATP6V1G1P6	ACCTGCAGTGAAAGAACCGG	test
ATP6V1G1P6_chr5-:78222364	ATP6V1G1P6	TGCAGCTGCCTTGGGATCGC	test
ATP6V1G1P6_chr5-:78222285	ATP6V1G1P6	TTCACCTTGAACTGCTGCTT	test
ATP6V1G1P6_chr5-:78222253	ATP6V1G1P6	CCCTCCGGTTCTTTCACTGC	test
ATP6V1G1P6_chr5-:78222363	ATP6V1G1P6	GCAGCTGCCTTGGGATCGCA	test
ATP6V1G1P6_chr5+:78222264	ATP6V1G1P6	CCTGCAGTGAAAGAACCGGA	test
ATP6V1G1P6_chr5+:78222321	ATP6V1G1P6	TGAACAATATTGCCTGCAGA	test
ATP6V1G1P6_chr5-:78222372	ATP6V1G1P6	TTTAATGCTGCAGCTGCCTT	test
ATP6V1G1P6_chr5+:78222320	ATP6V1G1P6	TTGAACAATATTGCCTGCAG	test
ATP6V1G1P6_chr5+:78222367	ATP6V1G1P6	GCTGCTGCCCTGCGATCCCA	test
ATP6V1G1P6_chr5+:78222292	ATP6V1G1P6	CAGGCCAAAGCAGCAGTTCA	test
ATP6V1G1P6_chr5-:78222348	ATP6V1G1P6	TCGCAGGGCAGCAGCCTCCT	test
ATP6V1G1P6_chr5-:78222373	ATP6V1G1P6	CTTTAATGCTGCAGCTGCCT	test
ATP6V1G1P6_chr5+:78222273	ATP6V1G1P6	AAAGAACCGGAGGGAGAAGC	test
ATP6V1G1P6_chr5-:78222268	ATP6V1G1P6	CTTTGGCCTGCTTCTCCCTC	test
ATP6V1G1P6_chr5+:78222345	ATP6V1G1P6	GAAAGAGTTCAAGGCCAAGG	test
CTC-470C15.1_chr5-:88602903	CTC-470C15.1	GCGAATCGTGCCTCACTACG	test
CTC-470C15.1_chr5+:88602904	CTC-470C15.1	TTGTTACAGGCCTCGTAGTG	test
CTC-470C15.1_chr5-:88602865	CTC-470C15.1	CTTATTCGCCCGTCCAGTAG	test
CTC-470C15.1_chr5+:88602799	CTC-470C15.1	GCGGACTGCACGCAAATCCA	test
CTC-470C15.1_chr5-:88602805	CTC-470C15.1	CCCGGGTGCTTTACCACCCG	test
CTC-470C15.1_chr5+:88602815	CTC-470C15.1	TCCACGGGTGGTAAAGCACC	test
CTC-470C15.1_chr5+:88602891	CTC-470C15.1	CGAATAAGCTTCATTGTTAC	test
CTC-470C15.1_chr5+:88602803	CTC-470C15.1	ACTGCACGCAAATCCACGGG	test
CTC-470C15.1_chr5-:88602864	CTC-470C15.1	TTATTCGCCCGTCCAGTAGA	test
CTC-470C15.1_chr5+:88602800	CTC-470C15.1	CGGACTGCACGCAAATCCAC	test
CTC-470C15.1_chr5+:88602816	CTC-470C15.1	CCACGGGTGGTAAAGCACCC	test
CTC-470C15.1_chr5-:88602847	CTC-470C15.1	AGAGGGCGCACTCTTGCAAA	test
CTC-470C15.1_chr5-:88602937	CTC-470C15.1	CAATTTCTCACACCAGACGC	test
CTC-470C15.1_chr5-:88602932	CTC-470C15.1	TCTCACACCAGACGCTGGAA	test
AC133141.1_chr3-:25441501	AC133141.1	CTACTCGAAAATCCAACCCG	test
AC133141.1_chr3+:25441457	AC133141.1	AGAGGGCGCACTCTCGTGAA	test
AC133141.1_chr3+:25441384	AC133141.1	TCGTATAAAGCCTAATTTCA	test
AC133141.1_chr3-:25441383	AC133141.1	CTGGGGTACTCCGTGAAATT	test
AC133141.1_chr3-:25441488	AC133141.1	CAACCCGTGGAAAAGCATCC	test
AC133141.1_chr3-:25441489	AC133141.1	CCAACCCGTGGAAAAGCATC	test
AC133141.1_chr3-:25441402	AC133141.1	CATTGTTACAGGCCTGGGAC	test
AC133141.1_chr3+:25441401	AC133141.1	TCACGGAGTACCCCAGTCCC	test
AC133141.1_chr3-:25441407	AC133141.1	AACCTCATTGTTACAGGCCT	test
AC133141.1_chr3-:25441401	AC133141.1	ATTGTTACAGGCCTGGGACT	test
AC133141.1_chr3-:25441478	AC133141.1	AAAAGCATCCGGGAAGAAAC	test
AC133141.1_chr3-:25441441	AC133141.1	CACGAGAGTGCGCCCTCTAC	test
AC133141.1_chr3+:25441439	AC133141.1	TTTCTCCACCCCGCCAGTAG	test
AC133141.1_chr3-:25441436	AC133141.1	GAGTGCGCCCTCTACTGGCG	test
AC133141.1_chr3-:25441400	AC133141.1	TTGTTACAGGCCTGGGACTG	test
AC133141.1_chr3-:25441437	AC133141.1	AGAGTGCGCCCTCTACTGGC	test
AC133141.1_chr3-:25441413	AC133141.1	TGGAGAAACCTCATTGTTAC	test
AC133141.1_chr3-:25441408	AC133141.1	AAACCTCATTGTTACAGGCC	test
AC133141.1_chr3-:25441433	AC133141.1	TGCGCCCTCTACTGGCGGGG	test
AC133141.1_chr3+:25441416	AC133141.1	GTCCCAGGCCTGTAACAATG	test
AC133141.1_chr3-:25441438	AC133141.1	GAGAGTGCGCCCTCTACTGG	test
CTD-2105E13.16_chr19+:55339411	CTD-2105E13.16	AGAGGGAGGCCGCGACTCTA	test
CTD-2105E13.16_chr19+:55339421	CTD-2105E13.16	CGCGACTCTATGGTGATGGA	test
CTD-2105E13.16_chr19+:55339289	CTD-2105E13.16	TAACCGCAGGCCTCGCGGGG	test
CTD-2105E13.16_chr19+:55339276	CTD-2105E13.16	TTCGTCGCCTTGGTAACCGC	test
CTD-2105E13.16_chr19+:55339286	CTD-2105E13.16	TGGTAACCGCAGGCCTCGCG	test
CTD-2105E13.16_chr19-:55339368	CTD-2105E13.16	CCGAGGAAAGCTTCGGCCAC	test
CTD-2105E13.16_chr19-:55339409	CTD-2105E13.16	CGTCCATCACCATAGAGTCG	test
CTD-2105E13.16_chr19+:55339417	CTD-2105E13.16	AGGCCGCGACTCTATGGTGA	test
CTD-2105E13.16_chr19+:55339285	CTD-2105E13.16	TTGGTAACCGCAGGCCTCGC	test
CTD-2105E13.16_chr19-:55339365	CTD-2105E13.16	AGGAAAGCTTCGGCCACAGG	test
CTD-2105E13.16_chr19+:55339290	CTD-2105E13.16	AACCGCAGGCCTCGCGGGGC	test
CTD-2105E13.16_chr19-:55339340	CTD-2105E13.16	GAAAGCCAGACCCGGCGGGA	test
CTD-2105E13.16_chr19+:55339379	CTD-2105E13.16	CCTGTGGCCGAAGCTTTCCT	test
CTD-2105E13.16_chr19+:55339340	CTD-2105E13.16	ATTCACCGCCTCCCTCCCGC	test
CTD-2105E13.16_chr19+:55339284	CTD-2105E13.16	CTTGGTAACCGCAGGCCTCG	test
CTD-2105E13.16_chr19-:55339341	CTD-2105E13.16	AGAAAGCCAGACCCGGCGGG	test
CTD-2105E13.16_chr19-:55339364	CTD-2105E13.16	GGAAAGCTTCGGCCACAGGA	test
CTD-2105E13.16_chr19+:55339346	CTD-2105E13.16	CGCCTCCCTCCCGCCGGGTC	test
CTD-2105E13.16_chr19-:55339375	CTD-2105E13.16	TATTTCTCCGAGGAAAGCTT	test
CTD-2105E13.16_chr19-:55339281	CTD-2105E13.16	CTCCCGCCCCGCGAGGCCTG	test
CTD-2105E13.16_chr19-:55339344	CTD-2105E13.16	GGGAGAAAGCCAGACCCGGC	test
CTD-2105E13.16_chr19+:55339341	CTD-2105E13.16	TTCACCGCCTCCCTCCCGCC	test
CTD-2105E13.16_chr19-:55339337	CTD-2105E13.16	AGCCAGACCCGGCGGGAGGG	test
RP11-844G16.3_chr15+:56249277	RP11-844G16.3	GCTCTCTCTTAGGCAACTCC	test
RP11-844G16.3_chr15-:56249318	RP11-844G16.3	ATTCTAAGGAGTCCTGTTCC	test
RP11-844G16.3_chr15-:56249211	RP11-844G16.3	AAGTTCCCTTGAAGCCTGCT	test
RP11-844G16.3_chr15-:56249315	RP11-844G16.3	CTAAGGAGTCCTGTTCCAGG	test
RP11-844G16.3_chr15+:56249279	RP11-844G16.3	TCTCTCTTAGGCAACTCCAG	test
RP11-844G16.3_chr15+:56249351	RP11-844G16.3	TGCAGTGTCAATGTTATTTC	test
RP11-844G16.3_chr15+:56249317	RP11-844G16.3	TAAATGAAGCCTCCTGGAAC	test
RP11-844G16.3_chr15+:56249234	RP11-844G16.3	CAAGGGAACTTTGTGTTACT	test
RP11-844G16.3_chr15-:56249206	RP11-844G16.3	CCCTTGAAGCCTGCTTGGAA	test
RP11-844G16.3_chr15+:56249217	RP11-844G16.3	CCATTCCAAGCAGGCTTCAA	test
RP11-844G16.3_chr15+:56249216	RP11-844G16.3	TCCATTCCAAGCAGGCTTCA	test
RP11-844G16.3_chr15+:56249267	RP11-844G16.3	TCTGACAAGAGCTCTCTCTT	test
RP11-844G16.3_chr15-:56249332	RP11-844G16.3	AACATTGACACTGCATTCTA	test
RP11-844G16.3_chr15+:56249208	RP11-844G16.3	CCCTCCCTTCCATTCCAAGC	test
RP11-844G16.3_chr15-:56249294	RP11-844G16.3	GGCTTCATTTAAAATGTGAA	test
RP11-844G16.3_chr15-:56249284	RP11-844G16.3	AAAATGTGAATGGTGCCCCC	test
RP13-270P17.3_chr18-:3246382	RP13-270P17.3	AAATCGGAGTCTTTAAGGGC	test
RP13-270P17.3_chr18-:3246376	RP13-270P17.3	GAGTCTTTAAGGGCAGGTCC	test
RP13-270P17.3_chr18+:3246399	RP13-270P17.3	CTTAAAGACTCCGATTTAGT	test
RP13-270P17.3_chr18+:3246369	RP13-270P17.3	CATTACATGGATGGCTTCCC	test
RP13-270P17.3_chr18-:3246375	RP13-270P17.3	AGTCTTTAAGGGCAGGTCCT	test
RP13-270P17.3_chr18-:3246387	RP13-270P17.3	CTACTAAATCGGAGTCTTTA	test
RP13-270P17.3_chr18+:3246403	RP13-270P17.3	AAGACTCCGATTTAGTAGGT	test
RP13-270P17.3_chr18-:3246386	RP13-270P17.3	TACTAAATCGGAGTCTTTAA	test
RP13-270P17.3_chr18-:3246398	RP13-270P17.3	TCATTTCCAACCTACTAAAT	test
RP13-270P17.3_chr18-:3246271	RP13-270P17.3	ACAAACCCCAGACGGCTGCG	test
RP13-270P17.3_chr18-:3246255	RP13-270P17.3	TGCGCGGATGCGTTTGTTCC	test
RP13-270P17.3_chr18-:3246229	RP13-270P17.3	TTGCGAGCACTTGCAATGCA	test
RP13-270P17.3_chr18+:3246193	RP13-270P17.3	CGGAGCTGGTGCTCTCGTGG	test
RP13-270P17.3_chr18+:3246248	RP13-270P17.3	TGCAAGTGCTCGCAAGCTCC	test
RP13-270P17.3_chr18+:3246197	RP13-270P17.3	GCTGGTGCTCTCGTGGTGGC	test
RP13-270P17.3_chr18-:3246163	RP13-270P17.3	TCCGCCAGCGTCCTCTCCAG	test
RP13-270P17.3_chr18-:3246216	RP13-270P17.3	CAATGCATGGACACCTCCAC	test
RP13-270P17.3_chr18-:3246212	RP13-270P17.3	GCATGGACACCTCCACAGGG	test
RP13-270P17.3_chr18+:3246211	RP13-270P17.3	GGTGGCAGGCCACCACCCTG	test
RP13-270P17.3_chr18+:3246158	RP13-270P17.3	TTCTGCTCTAAAGTGTCCTC	test
RP13-270P17.3_chr18+:3246163	RP13-270P17.3	CTCTAAAGTGTCCTCTGGAG	test
RP13-270P17.3_chr18-:3246215	RP13-270P17.3	AATGCATGGACACCTCCACA	test
RP13-270P17.3_chr18+:3246190	RP13-270P17.3	TGGCGGAGCTGGTGCTCTCG	test
RP13-270P17.3_chr18+:3246173	RP13-270P17.3	TCCTCTGGAGAGGACGCTGG	test
RP13-270P17.3_chr18+:3246214	RP13-270P17.3	GGCAGGCCACCACCCTGTGG	test
RP13-270P17.3_chr18+:3246179	RP13-270P17.3	GGAGAGGACGCTGGCGGAGC	test
RP13-270P17.3_chr18+:3246170	RP13-270P17.3	GTGTCCTCTGGAGAGGACGC	test
RP13-270P17.3_chr18-:3246209	RP13-270P17.3	TGGACACCTCCACAGGGTGG	test
RP13-270P17.3_chr18-:3246139	RP13-270P17.3	CACTTTAGAGCAGAAAGAAA	test
RP13-270P17.3_chr18+:3246275	RP13-270P17.3	AACGCATCCGCGCAGCCGTC	test
AC018712.2_chr2-:172674200	AC018712.2	TGAGCTAACTGCGCCACCTG	test
AC018712.2_chr2+:172674166	AC018712.2	GATCAGCCTTCCACCAGACC	test
AC018712.2_chr2-:172674152	AC018712.2	GGTCTGGTGGAAGGCTGATC	test
AC018712.2_chr2+:172674167	AC018712.2	ATCAGCCTTCCACCAGACCT	test
AC018712.2_chr2-:172674168	AC018712.2	GAAACAGCTCCTCCCAGGTC	test
AC018712.2_chr2+:172674170	AC018712.2	AGCCTTCCACCAGACCTGGG	test
AC018712.2_chr2-:172674161	AC018712.2	CTCCTCCCAGGTCTGGTGGA	test
AC018712.2_chr2+:172674138	AC018712.2	TGCAAGTGCGCACACGTGCT	test
AC018712.2_chr2+:172674233	AC018712.2	ATGACCCAGAAGTCTCTCAA	test
AC018712.2_chr2-:172674173	AC018712.2	CAAAAGAAACAGCTCCTCCC	test
AC018712.2_chr2-:172674227	AC018712.2	CTGAACCCTTGAGAGACTTC	test
AC018712.2_chr2-:172674226	AC018712.2	TGAACCCTTGAGAGACTTCT	test
AC018712.2_chr2+:172674232	AC018712.2	CATGACCCAGAAGTCTCTCA	test
AC018712.2_chr2+:172674185	AC018712.2	CTGGGAGGAGCTGTTTCTTT	test
AC018712.2_chr2-:172674165	AC018712.2	ACAGCTCCTCCCAGGTCTGG	test
AC018712.2_chr2-:172674863	AC018712.2	CAAGGTGGCGCCTTGGACGC	test
AC018712.2_chr2+:172674879	AC018712.2	GTCCAAGGCGCCACCTTGCG	test
AC018712.2_chr2+:172674877	AC018712.2	GCGTCCAAGGCGCCACCTTG	test
AC018712.2_chr2-:172674851	AC018712.2	TTGGACGCGGGCGCACAGCC	test
AC018712.2_chr2-:172674864	AC018712.2	GCAAGGTGGCGCCTTGGACG	test
AC018712.2_chr2+:172674878	AC018712.2	CGTCCAAGGCGCCACCTTGC	test
AC018712.2_chr2-:172674878	AC018712.2	CGCCTGCTGTCCCCGCAAGG	test
AC018712.2_chr2+:172674901	AC018712.2	GACAGCAGGCGGGGACTTCG	test
AC018712.2_chr2-:172674870	AC018712.2	GTCCCCGCAAGGTGGCGCCT	test
AC018712.2_chr2+:172674864	AC018712.2	GGGCTGTGCGCCCGCGTCCA	test
AC018712.2_chr2+:172674902	AC018712.2	ACAGCAGGCGGGGACTTCGC	test
AC018712.2_chr2+:172674892	AC018712.2	CCTTGCGGGGACAGCAGGCG	test
AC018712.2_chr2+:172674887	AC018712.2	CGCCACCTTGCGGGGACAGC	test
AC018712.2_chr2-:172674850	AC018712.2	TGGACGCGGGCGCACAGCCC	test
AC018712.2_chr2+:172674890	AC018712.2	CACCTTGCGGGGACAGCAGG	test
AC018712.2_chr2-:172674914	AC018712.2	GCTGTTGGAAAAATGGAACT	test
AC018712.2_chr2+:172674891	AC018712.2	ACCTTGCGGGGACAGCAGGC	test
AC018712.2_chr2-:172674881	AC018712.2	CCCCGCCTGCTGTCCCCGCA	test
AC018712.2_chr2+:172674816	AC018712.2	CGGGCTGCAGGCTGCCGGGC	test
AC018712.2_chr2+:172674824	AC018712.2	AGGCTGCCGGGCCGGGCCCT	test
AC018712.2_chr2+:172674843	AC018712.2	TGGGCTTCCTGAGCCTCTCC	test
AC018712.2_chr2-:172674845	AC018712.2	GCGGGCGCACAGCCCGGGAG	test
AC018712.2_chr2+:172674844	AC018712.2	GGGCTTCCTGAGCCTCTCCC	test
ATP6V1G1P2_chr8+:47194046	ATP6V1G1P2	TTTCTGGCTGGATGCCGCAA	test
ATP6V1G1P2_chr8+:47194091	ATP6V1G1P2	TTCCCTGTTCCGCTGAAAGT	test
ATP6V1G1P2_chr8-:47194082	ATP6V1G1P2	GACCTACTTTCAGCGGAACA	test
ATP6V1G1P2_chr8-:47194136	ATP6V1G1P2	AGGCAGCTGCAGCACGGAAG	test
ATP6V1G1P2_chr8-:47194083	ATP6V1G1P2	AGACCTACTTTCAGCGGAAC	test
ATP6V1G1P2_chr8-:47194049	ATP6V1G1P2	GGATAACCTCTTGGCCTTTG	test
ATP6V1G1P2_chr8+:47194096	ATP6V1G1P2	TGTTCCGCTGAAAGTAGGTC	test
ATP6V1G1P2_chr8-:47194283	ATP6V1G1P2	GGCCGTTGAGAAGGTGTCAG	test
ATP6V1G1P2_chr8+:47194054	ATP6V1G1P2	TGGATGCCGCAAAGGCCAAG	test
ATP6V1G1P2_chr8+:47194099	ATP6V1G1P2	TCCGCTGAAAGTAGGTCTGG	test
ATP6V1G1P2_chr8+:47194292	ATP6V1G1P2	GGCCTCTGACACCTTCTCAA	test
ATP6V1G1P2_chr8-:47194089	ATP6V1G1P2	TCCTCCAGACCTACTTTCAG	test
ATP6V1G1P2_chr8-:47194232	ATP6V1G1P2	GCAGGCCAAAGTGGCAGTTC	test
ATP6V1G1P2_chr8+:47194151	ATP6V1G1P2	TTCCGTGCTGCAGCTGCCTT	test
ATP6V1G1P2_chr8+:47194264	ATP6V1G1P2	GCTTCAGCCTCTGGTTCTTT	test
ATP6V1G1P2_chr8-:47194058	ATP6V1G1P2	AGAGGGTGTGGATAACCTCT	test
ATP6V1G1P2_chr8-:47194203	ATP6V1G1P2	TTGAATAGTGCCACCTGCAG	test
ATP6V1G1P2_chr8+:47194238	ATP6V1G1P2	TTCAGCCTGAACTGCCACTT	test
ATP6V1G1P2_chr8-:47194292	ATP6V1G1P2	TGAGAAGCAGGCCGTTGAGA	test
ATP6V1G1P2_chr8-:47194165	ATP6V1G1P2	GCCAAGGAAGCTGTGGCACT	test
ATP6V1G1P2_chr8-:47194076	ATP6V1G1P2	CTTTCAGCGGAACAGGGAAG	test
ATP6V1G1P2_chr8-:47194133	ATP6V1G1P2	CAGCTGCAGCACGGAAGTGG	test
ATP6V1G1P2_chr8-:47194202	ATP6V1G1P2	TGAATAGTGCCACCTGCAGA	test
ATP6V1G1P2_chr8+:47194152	ATP6V1G1P2	TCCGTGCTGCAGCTGCCTTG	test
ATP6V1G1P2_chr8-:47194124	ATP6V1G1P2	CACGGAAGTGGAGGAGACCC	test
ATP6V1G1P2_chr8+:47194150	ATP6V1G1P2	CTTCCGTGCTGCAGCTGCCT	test
ATP6V1G1P2_chr8-:47194075	ATP6V1G1P2	TTTCAGCGGAACAGGGAAGA	test
ATP6V1G1P2_chr8-:47194260	ATP6V1G1P2	CCTGCAGCCAAAAGAACCAG	test
ATP6V1G1P2_chr8-:47194166	ATP6V1G1P2	GGCCAAGGAAGCTGTGGCAC	test
ATP6V1G1P2_chr8-:47194156	ATP6V1G1P2	GCTGTGGCACTGGGACCCCA	test
ATP6V1G1P2_chr8+:47194175	ATP6V1G1P2	TCCCAGTGCCACAGCTTCCT	test
ATP6V1G1P2_chr8-:47194142	ATP6V1G1P2	ACCCCAAGGCAGCTGCAGCA	test
ATP6V1G1P2_chr8-:47194304	ATP6V1G1P2	GCTGCTGCAGGTTGAGAAGC	test
ATP6V1G1P2_chr8-:47194019	ATP6V1G1P2	CCAGAAATTCATGAAAACTA	test
ATP6V1G1P2_chr8-:47194241	ATP6V1G1P2	GAGGCTGAAGCAGGCCAAAG	test
ATP6V1G1P2_chr8-:47194250	ATP6V1G1P2	AAAGAACCAGAGGCTGAAGC	test
ATP6V1G1P2_chr8-:47194316	ATP6V1G1P2	GGGCATCCAGCAGCTGCTGC	test
ATP6V1G1P2_chr8-:47194070	ATP6V1G1P2	GCGGAACAGGGAAGAGGGTG	test
ATP6V1G1P2_chr8+:47194103	ATP6V1G1P2	CTGAAAGTAGGTCTGGAGGA	test
ATP6V1G1P2_chr8-:47194172	ATP6V1G1P2	GTTCAAGGCCAAGGAAGCTG	test
LL22NC03-30E12.13_chr22-:22168459	LL22NC03-30E12.13	GACTTCTGTTGCATCCAGTG	test
LL22NC03-30E12.13_chr22+:22168628	LL22NC03-30E12.13	CTACTCAAGCTACACGACAG	test
LL22NC03-30E12.13_chr22+:22168629	LL22NC03-30E12.13	TACTCAAGCTACACGACAGT	test
LL22NC03-30E12.13_chr22+:22168593	LL22NC03-30E12.13	CTCTGGGGGACCCAATCCAT	test
LL22NC03-30E12.13_chr22-:22168592	LL22NC03-30E12.13	CTCAGTCTAGCCTATGGATT	test
LL22NC03-30E12.13_chr22+:22168456	LL22NC03-30E12.13	CCAACAATTTCTATCCACAC	test
LL22NC03-30E12.13_chr22-:22168598	LL22NC03-30E12.13	GTAGTACTCAGTCTAGCCTA	test
LL22NC03-30E12.13_chr22+:22168630	LL22NC03-30E12.13	ACTCAAGCTACACGACAGTG	test
LL22NC03-30E12.13_chr22+:22168631	LL22NC03-30E12.13	CTCAAGCTACACGACAGTGG	test
LL22NC03-30E12.13_chr22+:22168717	LL22NC03-30E12.13	GAAAATGATCACGTGATATC	test
LL22NC03-30E12.13_chr22+:22168657	LL22NC03-30E12.13	CTGCAGTGAAAGATCCAGAT	test
LL22NC03-30E12.13_chr22+:22168473	LL22NC03-30E12.13	CACTGGATGCAACAGAAGTC	test
LL22NC03-30E12.13_chr22-:22168593	LL22NC03-30E12.13	ACTCAGTCTAGCCTATGGAT	test
LL22NC03-30E12.13_chr22-:22168660	LL22NC03-30E12.13	TTACGTCTTGGCTCCCCATC	test
LL22NC03-30E12.13_chr22-:22168581	LL22NC03-30E12.13	CTATGGATTGGGTCCCCCAG	test
LL22NC03-30E12.13_chr22+:22168551	LL22NC03-30E12.13	ACCTGATTCTCAGACCTTCC	test
LL22NC03-30E12.13_chr22-:22168672	LL22NC03-30E12.13	TCAGAGGCAGGGTTACGTCT	test
LL22NC03-30E12.13_chr22-:22168529	LL22NC03-30E12.13	TGAGAATCAGGTGGTCATTC	test
LL22NC03-30E12.13_chr22-:22168738	LL22NC03-30E12.13	GCCTTGAGAGCTCAGGTTTC	test
LL22NC03-30E12.13_chr22-:22168445	LL22NC03-30E12.13	CCAGTGTGGATAGAAATTGT	test
LL22NC03-30E12.13_chr22+:22168658	LL22NC03-30E12.13	TGCAGTGAAAGATCCAGATG	test
LL22NC03-30E12.13_chr22-:22168575	LL22NC03-30E12.13	ATTGGGTCCCCCAGAGGCTC	test
LL22NC03-30E12.13_chr22+:22168552	LL22NC03-30E12.13	CCTGATTCTCAGACCTTCCT	test
LL22NC03-30E12.13_chr22+:22168692	LL22NC03-30E12.13	AACCCTGCCTCTGACAGCCT	test
LL22NC03-30E12.13_chr22+:22168576	LL22NC03-30E12.13	GCAAAGCTGCCCTGAGCCTC	test
LL22NC03-30E12.13_chr22-:22168541	LL22NC03-30E12.13	CCCAGGAAGGTCTGAGAATC	test
LL22NC03-30E12.13_chr22+:22168691	LL22NC03-30E12.13	TAACCCTGCCTCTGACAGCC	test
LL22NC03-30E12.13_chr22+:22168693	LL22NC03-30E12.13	ACCCTGCCTCTGACAGCCTG	test
LL22NC03-30E12.13_chr22+:22168656	LL22NC03-30E12.13	ACTGCAGTGAAAGATCCAGA	test
LL22NC03-30E12.13_chr22+:22168578	LL22NC03-30E12.13	AAAGCTGCCCTGAGCCTCTG	test
LL22NC03-30E12.13_chr22+:22168577	LL22NC03-30E12.13	CAAAGCTGCCCTGAGCCTCT	test
LL22NC03-30E12.13_chr22-:22168554	LL22NC03-30E12.13	GGGCAGCTTTGCTCCCAGGA	test
LL22NC03-30E12.13_chr22-:22168683	LL22NC03-30E12.13	TCCCCAGGCTGTCAGAGGCA	test
LL22NC03-30E12.13_chr22+:22168579	LL22NC03-30E12.13	AAGCTGCCCTGAGCCTCTGG	test
LL22NC03-30E12.13_chr22-:22168538	LL22NC03-30E12.13	AGGAAGGTCTGAGAATCAGG	test
LL22NC03-30E12.13_chr22-:22168558	LL22NC03-30E12.13	CTCAGGGCAGCTTTGCTCCC	test
LL22NC03-30E12.13_chr22-:22168485	LL22NC03-30E12.13	AAATCAATGTCTCAAAAAGT	test
LL22NC03-30E12.13_chr22-:22168684	LL22NC03-30E12.13	CTCCCCAGGCTGTCAGAGGC	test
LL22NC03-30E12.13_chr22-:22168574	LL22NC03-30E12.13	TTGGGTCCCCCAGAGGCTCA	test
RP4-784A16.3_chr1-:53291712	RP4-784A16.3	GTGGTGTGACCGAGACCATT	test
RP4-784A16.3_chr1-:53291744	RP4-784A16.3	TGACTGCTTCTGCCCCATAG	test
RP4-784A16.3_chr1-:53291740	RP4-784A16.3	TGCTTCTGCCCCATAGTGGC	test
[truncated: 12,305 more rows]
