# Supplementary material for: Myeloid leukemia vulnerabilities at CTCF-enriched long noncoding RNA loci
Source: Research Square preprint supplement (doi:10.21203/rs.3.rs-727909/v1), 2021-08-09
Supplement: Supplementary file 4 [file 82f45e925ce3c6741a8cc45b.xlsx]

## Sheet: Sheet 1
Supplementary Table 8: MYNRL15 tiling library sequences
sgRNA name	target gene	spacer	purpose
LUC1_1	LUC-Renilla	GGTATAATACACCGCGCTAC	controls
LUC1_2	LUC-Renilla	CACATATTGAGCCAGTAGCG	controls
LUC1_3	LUC-Renilla	TTGCCCATACCAATAAGGTC	controls
LUC1_4	LUC-Renilla	GGATGATAACTGGTCCGCAG	controls
LUC1_5	LUC-Renilla	GATAACTGGTCCGCAGTGGT	controls
LUC1_6	LUC-Renilla	CTTATTGGTATGGGCAAATC	controls
LUC1_7	LUC-Renilla	CGCGCTACTGGCTCAATATG	controls
LUC1_8	LUC-Renilla	TGTATTATACCAGACCTTAT	controls
LUC1_9	LUC-Renilla	TGATAACTGGTCCGCAGTGG	controls
LUC1_10	LUC-Renilla	CCATGATTGGGGTGCTTGTT	controls
LUC2_1	LUC3	CATAGCTTCTGCCAACCGAA	controls
LUC2_2	LUC3	CCTCTAGAGGATGGAACCGC	controls
LUC2_3	LUC3	AATACTTCGAAATGTCCGTT	controls
LUC2_4	LUC3	CTTCGAAATGTCCGTTCGGT	controls
LUC2_5	LUC3	CTAGAGGATAGAATGGCGCC	controls
LUC2_6	LUC3	CGCTGGAGAGCAACTGCATA	controls
LUC2_7	LUC3	TCTAGAGGATAGAATGGCGC	controls
LUC2_8	LUC3	CAGAAGCTATGAAACGATAT	controls
LUC2_9	LUC3	AAGAGATACGCCCTGGTTCC	controls
LUC2_10	LUC3	GGCTATGAAGAGATACGCCC	controls
LUC3_1	GL3-LUC3	TCCAGCGGATAGAATGGCGC	controls
LUC3_2	GL3-LUC3	TTCATTATAAATGTCGTTCG	controls
LUC3_3	GL3-LUC3	GGATTCTAAAACGGATTACC	controls
LUC3_4	GL3-LUC3	TCATTATAAATGTCGTTCGC	controls
LUC3_6	GL3-LUC3	CCCGGCGCCATTCTATCCGC	controls
LUC3_7	GL3-LUC3	CCGCTGGAAGATGGAACCGC	controls
LUC3_8	GL3-LUC3	GGGCATTTCGCAGCCTACCG	controls
LUC3_10	GL3-LUC3	CAATTCTTTATGCCGGTGTT	controls
MYC_1	MYC	GGTGTGACCGCAACGTAGGA	controls
MYC_2	MYC	GAAGGGTGTGACCGCAACGT	controls
MYC_3	MYC	TCGCTTACCAGAGTCGCTGC	controls
MYC_4	MYC	TCCTCGTCGCAGTAGAAATA	controls
MYC_5	MYC	CTATGACCTCGACTACGACT	controls
MYB_1	MYB	AGAAATACGGTCCGAAACGT	controls
MYB_2	MYB	AATGCGTCGGAAGGTCGAAC	controls
MYB_3	MYB	ACATGTAACGCTACAGGGTA	controls
MYB_4	MYB	TATTTACATGTAACGCTACA	controls
MYB_5	MYB	TTGACATATTATTACCGTCC	controls
SF3B3_1	SF3B3	ATCATAACGGCTCGCCCTTT	controls
SF3B3_2	SF3B3	GATACTCGCACTCGGTACCT	controls
SF3B3_3	SF3B3	AATCATAACGGCTCGCCCTT	controls
SF3B3_4	SF3B3	CCCACTGTCTTACGAGACAC	controls
SF3B3_5	SF3B3	GGGCAATCACCACTTGTCGC	controls
RPL9_1	RPL9	TCTAGTCGACATTACTCTGA	controls
RPL9_2	RPL9	TACAGCTCCGGGTTGACAAA	controls
RPL9_3	RPL9	TGGGTGAAAAATATATCCGC	controls
RPL9_4	RPL9	GGGTGAAAAATATATCCGCA	controls
RPL9_5	RPL9	ACTGTCGACATTCCAGAAAA	controls
POLR2A_1	POLR2A	ACTGTGACAATCATCCACTC	controls
POLR2A_2	POLR2A	GGATGACCCACTAAGTCGAC	controls
POLR2A_3	POLR2A	TGGGGGGTGACAATCATGCG	controls
POLR2A_4	POLR2A	CACTCTGGCCGTGCATAGCG	controls
POLR2A_5	POLR2A	GGCCAAGCAGGACGTAATAG	controls
U2AF1_1	U2AF1	CAATAAACCGACGTTTAGCC	controls
U2AF1_2	U2AF1	GCTTCTCTGAAGTCCGTCAC	controls
U2AF1_3	U2AF1	TGATTGACTTGAATAACCGT	controls
U2AF1_4	U2AF1	GTCCGTCACGGGTGACAGCT	controls
U2AF1_5	U2AF1	GGTGGGGAACGTGTACGTCA	controls
25s	MYNRL15	ACATAAAAATTTAGCAGGTC	tiling
38s	MYNRL15	GCAGGTCTGGAAAACAACTG	tiling
46as	MYNRL15	TTATCACTGTGGTGCATTCT	tiling
47as	MYNRL15	TTTATCACTGTGGTGCATTC	tiling
98s	MYNRL15	AAAAAAGAAGCTAAGACAGA	tiling
101s	MYNRL15	AAAGAAGCTAAGACAGATGG	tiling
120s	MYNRL15	GAGGATAGACTGAGAAGCTT	tiling
169s	MYNRL15	AAAAAGACTAGTGAGAATAC	tiling
170s	MYNRL15	AAAAGACTAGTGAGAATACA	tiling
188s	MYNRL15	CAGGGATGAGAAAACAAAGA	tiling
257s	MYNRL15	AGCTCATTAAGTTCCAAGAA	tiling
280s	MYNRL15	TACATTTAAAAAAAAAGGCC	tiling
284s	MYNRL15	TTTAAAAAAAAAGGCCAGGC	tiling
285s	MYNRL15	TTAAAAAAAAAGGCCAGGCC	tiling
290s	MYNRL15	AAAAAAGGCCAGGCCGGGTG	tiling
293s	MYNRL15	AAAGGCCAGGCCGGGTGCGG	tiling
582s	MYNRL15	CTCAAAAAAAATAGATAGCT	tiling
587s	MYNRL15	AAAAAATAGATAGCTGGGCG	tiling
590s	MYNRL15	AAATAGATAGCTGGGCGCGG	tiling
792s	MYNRL15	TGGCATGAACCCGGAGGCAG	tiling
1066s	MYNRL15	CCAGAAAAATCAAAATGTAG	tiling
1067s	MYNRL15	CAGAAAAATCAAAATGTAGC	tiling
1068s	MYNRL15	AGAAAAATCAAAATGTAGCG	tiling
1076s	MYNRL15	CAAAATGTAGCGGGGCATGC	tiling
1243as	MYNRL15	ATTTGCAATATATCTACACG	tiling
1285s	MYNRL15	TTACGTAAGATAAAACCTAA	tiling
1290s	MYNRL15	TAAGATAAAACCTAAAGGCC	tiling
1295s	MYNRL15	TAAAACCTAAAGGCCAGGCA	tiling
1298s	MYNRL15	AACCTAAAGGCCAGGCACGG	tiling
1539as	MYNRL15	TCCCACTCACTCTATTGCCA	tiling
1580s	MYNRL15	GATTCACTCTCAAAAGAGAA	tiling
1611s	MYNRL15	AGAACTTATTGAGAAACTGC	tiling
1625as	MYNRL15	TTAAACCATGGTTGTACAAC	tiling
1637as	MYNRL15	AAAAATCTACAGTTAAACCA	tiling
1640s	MYNRL15	TATAACCTGTTGTACAACCA	tiling
1958as	MYNRL15	AAAAAAAAAGGCCAGTGTGG	tiling
2260as	MYNRL15	ACTAGGCAGGCTGGGTGCAG	tiling
2268as	MYNRL15	AGAAACACACTAGGCAGGCT	tiling
2269as	MYNRL15	AAGAAACACACTAGGCAGGC	tiling
2273as	MYNRL15	TCCAAAGAAACACACTAGGC	tiling
2277as	MYNRL15	AAGTTCCAAAGAAACACACT	tiling
2292s	MYNRL15	GCCTGCCTAGTGTGTTTCTT	tiling
2313s	MYNRL15	GGAACTTATCAAAATGTCTC	tiling
2316s	MYNRL15	ACTTATCAAAATGTCTCTGG	tiling
2319as	MYNRL15	AGGCATGAAGCCATCGTGCC	tiling
2320s	MYNRL15	ATCAAAATGTCTCTGGAGGC	tiling
2321s	MYNRL15	TCAAAATGTCTCTGGAGGCC	tiling
2329s	MYNRL15	TCTCTGGAGGCCGGGCACGA	tiling
2633as	MYNRL15	TCACAGGTCAGTAACAAAAC	tiling
2682s	MYNRL15	AAAAGTCTACTTTCGCAATT	tiling
2752s	MYNRL15	AAAATAGAAAAGTCTTACAA	tiling
2802as	MYNRL15	TCTAGGTTTGAATGGACTCC	tiling
2804s	MYNRL15	AGTTAGCTACAGTAGACACC	tiling
2835as	MYNRL15	TGTAGCTGATAGCAAATTCA	tiling
2858as	MYNRL15	ATTTCCCCCGTGCTCTTGAA	tiling
2871s	MYNRL15	AGCTACACCATTCAAGAGCA	tiling
2872s	MYNRL15	GCTACACCATTCAAGAGCAC	tiling
2873s	MYNRL15	CTACACCATTCAAGAGCACG	tiling
2874s	MYNRL15	TACACCATTCAAGAGCACGG	tiling
2936s	MYNRL15	TGCAATGTACAAAACTTTAG	tiling
2947s	MYNRL15	AAACTTTAGTGGAAGAAAGT	tiling
2978s	MYNRL15	AGCAAAAAGAGAATTTGTCT	tiling
2979s	MYNRL15	GCAAAAAGAGAATTTGTCTA	tiling
2980s	MYNRL15	CAAAAAGAGAATTTGTCTAG	tiling
2997s	MYNRL15	TAGGGGCATAAACTAATGAG	tiling
2998s	MYNRL15	AGGGGCATAAACTAATGAGA	tiling
3001s	MYNRL15	GGCATAAACTAATGAGAGGG	tiling
3002s	MYNRL15	GCATAAACTAATGAGAGGGA	tiling
3009as	MYNRL15	TACATTTATAGCCAGTATTT	tiling
3018s	MYNRL15	GGGAGGGTACACCTAAATAC	tiling
3055s	MYNRL15	CTAGTTTATAGTTTAAAAAG	tiling
3059s	MYNRL15	TTTATAGTTTAAAAAGAGGC	tiling
3102s	MYNRL15	ATATTGTGAAGAGTTATTCA	tiling
3106s	MYNRL15	TGTGAAGAGTTATTCAAGGC	tiling
3107s	MYNRL15	GTGAAGAGTTATTCAAGGCT	tiling
3115s	MYNRL15	TTATTCAAGGCTGGGCACAG	tiling
3187as	MYNRL15	TTCCACTAAGTTGGCCACAC	tiling
3263s	MYNRL15	ATCCAAAAACAGGTACTAAG	tiling
3271as	MYNRL15	TCCTAGCACCATTTGATGCA	tiling
3283s	MYNRL15	AGGACAGACCTTGCATCAAA	tiling
3290s	MYNRL15	ACCTTGCATCAAATGGTGCT	tiling
3317as	MYNRL15	TATACAAAATATATGATGTA	tiling
3436s	MYNRL15	TGGGTAACTACGTGAAATGA	tiling
3466as	MYNRL15	GCTACATACAGGTAGTAAAA	tiling
3477as	MYNRL15	GATGTTATGAGGCTACATAC	tiling
3488as	MYNRL15	AAGGTATACATGATGTTATG	tiling
3507as	MYNRL15	AATCAATTTAATTTGGTATA	tiling
3552s	MYNRL15	AAAAGAAATTTAACCCAAAA	tiling
3593s	MYNRL15	AAGAGCTAAAACGATAACTT	tiling
3594s	MYNRL15	AGAGCTAAAACGATAACTTT	tiling
3597s	MYNRL15	GCTAAAACGATAACTTTGGG	tiling
3642as	MYNRL15	GGGATTTATCCTTGCTGCCC	tiling
3875s	MYNRL15	GAAAGCTCCTAGAAGAAAAC	tiling
3888s	MYNRL15	AGAAAACAGGAAAAGCTTCA	tiling
3900s	MYNRL15	AAGCTTCATGGCATTAGATT	tiling
3935s	MYNRL15	AGATATGACACTAAAAACAC	tiling
3955s	MYNRL15	AGGCAACAAAATATATAAAG	tiling
4052as	MYNRL15	TCAGAGTAATCCCCAGGGTA	tiling
4057as	MYNRL15	AAAGTTCAGAGTAATCCCCA	tiling
4058as	MYNRL15	CAAAGTTCAGAGTAATCCCC	tiling
4060s	MYNRL15	CTCCAAAATGTACCATACCC	tiling
4061s	MYNRL15	TCCAAAATGTACCATACCCT	tiling
4062s	MYNRL15	CCAAAATGTACCATACCCTG	tiling
4117as	MYNRL15	TCTGCGAAAAAGTAGGTGAA	tiling
4124as	MYNRL15	GGAGGGCTCTGCGAAAAAGT	tiling
4141as	MYNRL15	CAAGTGAAGGCCCCAGCGGA	tiling
4142as	MYNRL15	CCAAGTGAAGGCCCCAGCGG	tiling
4145as	MYNRL15	TGCCCAAGTGAAGGCCCCAG	tiling
4151s	MYNRL15	TTTCGCAGAGCCCTCCGCTG	tiling
4154as	MYNRL15	ATAGTTGTTTGCCCAAGTGA	tiling
4162s	MYNRL15	CCTCCGCTGGGGCCTTCACT	tiling
4163s	MYNRL15	CTCCGCTGGGGCCTTCACTT	tiling
4196as	MYNRL15	TTGGGTACGAGGAAATTGTT	tiling
4207as	MYNRL15	AAGCGATCATCTTGGGTACG	tiling
4214as	MYNRL15	TCTGGAAAAGCGATCATCTT	tiling
4215as	MYNRL15	GTCTGGAAAAGCGATCATCT	tiling
4232as	MYNRL15	CCAAAGTTTATTAAGTTGTC	tiling
4252s	MYNRL15	CCAGACAACTTAATAAACTT	tiling
4261s	MYNRL15	TTAATAAACTTTGGCTTTAA	tiling
4269s	MYNRL15	CTTTGGCTTTAATGGATGAC	tiling
4299as	MYNRL15	CAGTCGTTGCTGAGCAGCTG	tiling
4327as	MYNRL15	GGGGAGGGATTGCCCGGTGG	tiling
4330as	MYNRL15	CATGGGGAGGGATTGCCCGG	tiling
4333as	MYNRL15	GGCCATGGGGAGGGATTGCC	tiling
4334s	MYNRL15	AACGACTGAAAAACCACCAC	tiling
4335s	MYNRL15	ACGACTGAAAAACCACCACC	tiling
4342as	MYNRL15	TTGCTCGGTGGCCATGGGGA	tiling
4343as	MYNRL15	TTTGCTCGGTGGCCATGGGG	tiling
4346as	MYNRL15	AACTTTGCTCGGTGGCCATG	tiling
4347as	MYNRL15	GAACTTTGCTCGGTGGCCAT	tiling
4348as	MYNRL15	GGAACTTTGCTCGGTGGCCA	tiling
4351s	MYNRL15	CACCGGGCAATCCCTCCCCA	tiling
4354as	MYNRL15	GGCGGTGGAACTTTGCTCGG	tiling
4357as	MYNRL15	GGAGGCGGTGGAACTTTGCT	tiling
4369as	MYNRL15	GGTCGGCGTAGGGGAGGCGG	tiling
4372as	MYNRL15	GGCGGTCGGCGTAGGGGAGG	tiling
4375as	MYNRL15	CCCGGCGGTCGGCGTAGGGG	tiling
4378as	MYNRL15	GAGCCCGGCGGTCGGCGTAG	tiling
4379as	MYNRL15	GGAGCCCGGCGGTCGGCGTA	tiling
4380as	MYNRL15	GGGAGCCCGGCGGTCGGCGT	tiling
4386as	MYNRL15	GACCCCGGGAGCCCGGCGGT	tiling
4390as	MYNRL15	GTCCGACCCCGGGAGCCCGG	tiling
4393as	MYNRL15	GCTGTCCGACCCCGGGAGCC	tiling
4394s	MYNRL15	GCCTCCCCTACGCCGACCGC	tiling
4395s	MYNRL15	CCTCCCCTACGCCGACCGCC	tiling
4400as	MYNRL15	GCCCGGGGCTGTCCGACCCC	tiling
4401as	MYNRL15	GGCCCGGGGCTGTCCGACCC	tiling
4402s	MYNRL15	TACGCCGACCGCCGGGCTCC	tiling
4403s	MYNRL15	ACGCCGACCGCCGGGCTCCC	tiling
4404s	MYNRL15	CGCCGACCGCCGGGCTCCCG	tiling
4408s	MYNRL15	GACCGCCGGGCTCCCGGGGT	tiling
4415as	MYNRL15	GAAGGCCCGGAAGTGGCCCG	tiling
4416as	MYNRL15	GGAAGGCCCGGAAGTGGCCC	tiling
4417as	MYNRL15	GGGAAGGCCCGGAAGTGGCC	tiling
4418s	MYNRL15	CTCCCGGGGTCGGACAGCCC	tiling
4419s	MYNRL15	TCCCGGGGTCGGACAGCCCC	tiling
4422as	MYNRL15	CTTCCGGGAAGGCCCGGAAG	tiling
4428as	MYNRL15	CAGGGACTTCCGGGAAGGCC	tiling
4429s	MYNRL15	GGACAGCCCCGGGCCACTTC	tiling
4430s	MYNRL15	GACAGCCCCGGGCCACTTCC	tiling
4433as	MYNRL15	AGTGACAGGGACTTCCGGGA	tiling
4437as	MYNRL15	GTTAAGTGACAGGGACTTCC	tiling
4438as	MYNRL15	TGTTAAGTGACAGGGACTTC	tiling
4439s	MYNRL15	GGGCCACTTCCGGGCCTTCC	tiling
4446as	MYNRL15	ACTTCGGTTGTTAAGTGACA	tiling
4447as	MYNRL15	TACTTCGGTTGTTAAGTGAC	tiling
4462as	MYNRL15	TTCCGCATTGCGGGTTACTT	tiling
4471as	MYNRL15	CCCTCGCCCTTCCGCATTGC	tiling
4472as	MYNRL15	CCCCTCGCCCTTCCGCATTG	tiling
4480s	MYNRL15	AACCGAAGTAACCCGCAATG	tiling
4484s	MYNRL15	GAAGTAACCCGCAATGCGGA	tiling
4485s	MYNRL15	AAGTAACCCGCAATGCGGAA	tiling
4490s	MYNRL15	ACCCGCAATGCGGAAGGGCG	tiling
4491s	MYNRL15	CCCGCAATGCGGAAGGGCGA	tiling
4492s	MYNRL15	CCGCAATGCGGAAGGGCGAG	tiling
4506as	MYNRL15	CTCAAGCCGCGCGGGAAACT	tiling
4514as	MYNRL15	CCCAGTACCTCAAGCCGCGC	tiling
4515as	MYNRL15	CCCCAGTACCTCAAGCCGCG	tiling
4520s	MYNRL15	GAGTCACCGAGTTTCCCGCG	tiling
4527s	MYNRL15	CGAGTTTCCCGCGCGGCTTG	tiling
4533s	MYNRL15	TCCCGCGCGGCTTGAGGTAC	tiling
4534s	MYNRL15	CCCGCGCGGCTTGAGGTACT	tiling
4535s	MYNRL15	CCGCGCGGCTTGAGGTACTG	tiling
4540as	MYNRL15	ATTGGGCCGGTGGGGGATTC	tiling
4541s	MYNRL15	GGCTTGAGGTACTGGGGAAC	tiling
4547as	MYNRL15	CAACATGATTGGGCCGGTGG	tiling
4548as	MYNRL15	GCAACATGATTGGGCCGGTG	tiling
4549as	MYNRL15	AGCAACATGATTGGGCCGGT	tiling
4550as	MYNRL15	CAGCAACATGATTGGGCCGG	tiling
4553as	MYNRL15	CAGCAGCAACATGATTGGGC	tiling
4554s	MYNRL15	GGGGAACCGGAATCCCCCAC	tiling
4557as	MYNRL15	ACCCCAGCAGCAACATGATT	tiling
4558as	MYNRL15	GACCCCAGCAGCAACATGAT	tiling
4574s	MYNRL15	CGGCCCAATCATGTTGCTGC	tiling
4575s	MYNRL15	GGCCCAATCATGTTGCTGCT	tiling
4576s	MYNRL15	GCCCAATCATGTTGCTGCTG	tiling
4584as	MYNRL15	TGACAACCACTGCTGGGCAC	tiling
4585s	MYNRL15	TGTTGCTGCTGGGGTCTCTC	tiling
4590as	MYNRL15	GCTTACTGACAACCACTGCT	tiling
4591as	MYNRL15	CGCTTACTGACAACCACTGC	tiling
4598s	MYNRL15	GTCTCTCCGGTGCCCAGCAG	tiling
4612s	MYNRL15	CAGCAGTGGTTGTCAGTAAG	tiling
4613s	MYNRL15	AGCAGTGGTTGTCAGTAAGC	tiling
4616s	MYNRL15	AGTGGTTGTCAGTAAGCGGG	tiling
4623as	MYNRL15	AAAGAAAAGACGTATCGGAA	tiling
4624as	MYNRL15	AAAAGAAAAGACGTATCGGA	tiling
4628as	MYNRL15	TGAAAAAAGAAAAGACGTAT	tiling
4930as	MYNRL15	AGTTGGAAGGGGGCCAGGCG	tiling
4935as	MYNRL15	AAGAAAGTTGGAAGGGGGCC	tiling
4940as	MYNRL15	CCGTTAAGAAAGTTGGAAGG	tiling
4941as	MYNRL15	CCCGTTAAGAAAGTTGGAAG	tiling
4942as	MYNRL15	TCCCGTTAAGAAAGTTGGAA	tiling
4943as	MYNRL15	TTCCCGTTAAGAAAGTTGGA	tiling
4947as	MYNRL15	GCCTTTCCCGTTAAGAAAGT	tiling
4960s	MYNRL15	CCCCCTTCCAACTTTCTTAA	tiling
4961s	MYNRL15	CCCCTTCCAACTTTCTTAAC	tiling
4966s	MYNRL15	TCCAACTTTCTTAACGGGAA	tiling
4975as	MYNRL15	ACACATAGGTGCTCAAGAAA	tiling
4989as	MYNRL15	CCTGATGGAGCCTGACACAT	tiling
4999s	MYNRL15	TTCTTGAGCACCTATGTGTC	tiling
5004as	MYNRL15	TTAGACTGTGACGTGCCTGA	tiling
5009s	MYNRL15	CCTATGTGTCAGGCTCCATC	tiling
5027as	MYNRL15	ACATGGGTTGTGTAATTATC	tiling
5043as	MYNRL15	GGCTTCCTTGTCAGTGACAT	tiling
5044as	MYNRL15	TGGCTTCCTTGTCAGTGACA	tiling
5058s	MYNRL15	CACAACCCATGTCACTGACA	tiling
5064as	MYNRL15	GGCCTCAACCCCTCCGAACC	tiling
5066s	MYNRL15	ATGTCACTGACAAGGAAGCC	tiling
5071s	MYNRL15	ACTGACAAGGAAGCCAGGTT	tiling
5074s	MYNRL15	GACAAGGAAGCCAGGTTCGG	tiling
5075s	MYNRL15	ACAAGGAAGCCAGGTTCGGA	tiling
5076s	MYNRL15	CAAGGAAGCCAGGTTCGGAG	tiling
5082s	MYNRL15	AGCCAGGTTCGGAGGGGTTG	tiling
5085as	MYNRL15	AGTCACCTCCCTCAGGTTGC	tiling
5086as	MYNRL15	GAGTCACCTCCCTCAGGTTG	tiling
5092as	MYNRL15	GTCCCGGAGTCACCTCCCTC	tiling
5096s	MYNRL15	GGGTTGAGGCCCGCAACCTG	tiling
5097s	MYNRL15	GGTTGAGGCCCGCAACCTGA	tiling
5100s	MYNRL15	TGAGGCCCGCAACCTGAGGG	tiling
5108as	MYNRL15	GCAGGACTAATTGTGTGTCC	tiling
5109s	MYNRL15	CAACCTGAGGGAGGTGACTC	tiling
5110s	MYNRL15	AACCTGAGGGAGGTGACTCC	tiling
5126as	MYNRL15	TATCTTTCCTTCAGCAAAGC	tiling
5139s	MYNRL15	AATTAGTCCTGCTTTGCTGA	tiling
5154as	MYNRL15	TTCTCCAGCCTCCGACTGGT	tiling
5155as	MYNRL15	CTTCTCCAGCCTCCGACTGG	tiling
5158as	MYNRL15	CTCCTTCTCCAGCCTCCGAC	tiling
5163s	MYNRL15	AAGATATGCAGCCCACCAGT	tiling
5166s	MYNRL15	ATATGCAGCCCACCAGTCGG	tiling
5170s	MYNRL15	GCAGCCCACCAGTCGGAGGC	tiling
5176s	MYNRL15	CACCAGTCGGAGGCTGGAGA	tiling
5196as	MYNRL15	ATAAAAATAACTCTGGGTTA	tiling
5202as	MYNRL15	TGGAAAATAAAAATAACTCT	tiling
5203as	MYNRL15	CTGGAAAATAAAAATAACTC	tiling
5222as	MYNRL15	TACTAGTTCCTAACACGTTC	tiling
5262as	MYNRL15	GTGGGATCTCTGGCCCCTCA	tiling
5263as	MYNRL15	GGTGGGATCTCTGGCCCCTC	tiling
5267s	MYNRL15	TAAATAATCTCAAGTCCCTG	tiling
5268s	MYNRL15	AAATAATCTCAAGTCCCTGA	tiling
5269s	MYNRL15	AATAATCTCAAGTCCCTGAG	tiling
5305as	MYNRL15	ACCGCCTCTCCCCAAGTCTT	tiling
5306as	MYNRL15	CACCGCCTCTCCCCAAGTCT	tiling
5314s	MYNRL15	TAGCAAACAGACCCAAGACT	tiling
5315s	MYNRL15	AGCAAACAGACCCAAGACTT	tiling
5316s	MYNRL15	GCAAACAGACCCAAGACTTG	tiling
5321s	MYNRL15	CAGACCCAAGACTTGGGGAG	tiling
5324s	MYNRL15	ACCCAAGACTTGGGGAGAGG	tiling
5342s	MYNRL15	GGCGGTGAGTGCATCAGAAA	tiling
5346s	MYNRL15	GTGAGTGCATCAGAAATGGA	tiling
5347s	MYNRL15	TGAGTGCATCAGAAATGGAT	tiling
5361as	MYNRL15	TAAGCTGAGCCCCGCGTGGT	tiling
5362as	MYNRL15	CTAAGCTGAGCCCCGCGTGG	tiling
5365as	MYNRL15	TAACTAAGCTGAGCCCCGCG	tiling
5370s	MYNRL15	TACATCTGATTCCCACCACG	tiling
5371s	MYNRL15	ACATCTGATTCCCACCACGC	tiling
5372s	MYNRL15	CATCTGATTCCCACCACGCG	tiling
5390s	MYNRL15	CGGGGCTCAGCTTAGTTAGC	tiling
5432as	MYNRL15	CCATCCTTCCCAGATATTAG	tiling
5448s	MYNRL15	TTGGCCTCTAATATCTGGGA	tiling
5452s	MYNRL15	CCTCTAATATCTGGGAAGGA	tiling
5455s	MYNRL15	CTAATATCTGGGAAGGATGG	tiling
5456s	MYNRL15	TAATATCTGGGAAGGATGGA	tiling
5464s	MYNRL15	GGGAAGGATGGAGGGAGCTC	tiling
5481s	MYNRL15	CTCAGGAGACACAGAAAAGA	tiling
5493as	MYNRL15	CAGCCTCGTTCAGGCCGGAC	tiling
5498as	MYNRL15	AACTCCAGCCTCGTTCAGGC	tiling
5499s	MYNRL15	GATGGCGTATGAATCCTGTC	tiling
5502as	MYNRL15	GCACAACTCCAGCCTCGTTC	tiling
5510s	MYNRL15	AATCCTGTCCGGCCTGAACG	tiling
5514s	MYNRL15	CTGTCCGGCCTGAACGAGGC	tiling
5524as	MYNRL15	CAGTGCTTGAAGCTATCCAG	tiling
5528s	MYNRL15	CGAGGCTGGAGTTGTGCCTC	tiling
5560as	MYNRL15	AGCATCTGTTCAAGCAGCGG	tiling
5561as	MYNRL15	AAGCATCTGTTCAAGCAGCG	tiling
5562as	MYNRL15	AAAGCATCTGTTCAAGCAGC	tiling
5563as	MYNRL15	TAAAGCATCTGTTCAAGCAG	tiling
5589as	MYNRL15	AACAAACCGGCAACTGGAAG	tiling
5595as	MYNRL15	TCAGGGAACAAACCGGCAAC	tiling
5602as	MYNRL15	AGGGGCTTCAGGGAACAAAC	tiling
5603s	MYNRL15	TTAGAGCCTCTTCCAGTTGC	tiling
5612as	MYNRL15	CAGGTGGTGAAGGGGCTTCA	tiling
5613as	MYNRL15	GCAGGTGGTGAAGGGGCTTC	tiling
5620as	MYNRL15	GGGCAGCGCAGGTGGTGAAG	tiling
5621as	MYNRL15	TGGGCAGCGCAGGTGGTGAA	tiling
5622as	MYNRL15	GTGGGCAGCGCAGGTGGTGA	tiling
5628as	MYNRL15	CTTCGAGTGGGCAGCGCAGG	tiling
5631as	MYNRL15	ATACTTCGAGTGGGCAGCGC	tiling
5640as	MYNRL15	AGTCCAGGAATACTTCGAGT	tiling
5641as	MYNRL15	GAGTCCAGGAATACTTCGAG	tiling
5655as	MYNRL15	ATGGTCAGAACATCGAGTCC	tiling
5657s	MYNRL15	CTGCCCACTCGAAGTATTCC	tiling
5674as	MYNRL15	CTGTCGACTCTTATGCAGGA	tiling
5678as	MYNRL15	GTTTCTGTCGACTCTTATGC	tiling
5718s	MYNRL15	AACTTGCTAGCGTGATGTCA	tiling
5730as	MYNRL15	CTTGCCAGGAAGTGGGGAAA	tiling
5736as	MYNRL15	ACCAAGCTTGCCAGGAAGTG	tiling
5737as	MYNRL15	AACCAAGCTTGCCAGGAAGT	tiling
5738as	MYNRL15	GAACCAAGCTTGCCAGGAAG	tiling
5744as	MYNRL15	GGCCTTGAACCAAGCTTGCC	tiling
5755s	MYNRL15	TCCCCACTTCCTGGCAAGCT	tiling
5762s	MYNRL15	TTCCTGGCAAGCTTGGTTCA	tiling
5765as	MYNRL15	CTCATTCCATCAGGAACTCA	tiling
5774as	MYNRL15	TCAGGACAGCTCATTCCATC	tiling
5779s	MYNRL15	TCAAGGCCATGAGTTCCTGA	tiling
5803as	MYNRL15	AATACAATAGCTGGGCCAAG	tiling
5804as	MYNRL15	AAATACAATAGCTGGGCCAA	tiling
5805as	MYNRL15	AAAATACAATAGCTGGGCCA	tiling
5808s	MYNRL15	CTGTCCTGAAAACTTCCCCT	tiling
5811as	MYNRL15	ACAGTAAAAATACAATAGCT	tiling
5812as	MYNRL15	TACAGTAAAAATACAATAGC	tiling
5853s	MYNRL15	TATGAAAGAAGATCAAAGAG	tiling
5857as	MYNRL15	AATTCCCAAATTAATCCTAC	tiling
5862s	MYNRL15	AGATCAAAGAGTGGTCCAGT	tiling
5872s	MYNRL15	GTGGTCCAGTAGGATTAATT	tiling
5873s	MYNRL15	TGGTCCAGTAGGATTAATTT	tiling
5890s	MYNRL15	TTTGGGAATTAAGAATGCCC	tiling
5891s	MYNRL15	TTGGGAATTAAGAATGCCCA	tiling
5887as	MYNRL15	CAGTTCCCCTGAAAAACCCT	tiling
5888as	MYNRL15	TCAGTTCCCCTGAAAAACCC	tiling
5911as	MYNRL15	CGCCTTCTGAAGACACATGT	tiling
5929s	MYNRL15	GACCAACATGTGTCTTCAGA	tiling
5932s	MYNRL15	CAACATGTGTCTTCAGAAGG	tiling
5938as	MYNRL15	GCTGTAAGGGAAAAGGGAGG	tiling
5939as	MYNRL15	GGCTGTAAGGGAAAAGGGAG	tiling
5940as	MYNRL15	GGGCTGTAAGGGAAAAGGGA	tiling
5941as	MYNRL15	TGGGCTGTAAGGGAAAAGGG	tiling
5944as	MYNRL15	GTATGGGCTGTAAGGGAAAA	tiling
5945as	MYNRL15	CGTATGGGCTGTAAGGGAAA	tiling
5951as	MYNRL15	CGCTTTCGTATGGGCTGTAA	tiling
5952as	MYNRL15	ACGCTTTCGTATGGGCTGTA	tiling
5960as	MYNRL15	CAGAGGGTACGCTTTCGTAT	tiling
5961as	MYNRL15	CCAGAGGGTACGCTTTCGTA	tiling
5976as	MYNRL15	CTGAATCGCTGCACCCCAGA	tiling
5977as	MYNRL15	CCTGAATCGCTGCACCCCAG	tiling
5981s	MYNRL15	CCATACGAAAGCGTACCCTC	tiling
5982s	MYNRL15	CATACGAAAGCGTACCCTCT	tiling
5983s	MYNRL15	ATACGAAAGCGTACCCTCTG	tiling
5997s	MYNRL15	CCTCTGGGGTGCAGCGATTC	tiling
6001as	MYNRL15	AGACAAGCTGTACAATCTGA	tiling
6002as	MYNRL15	CAGACAAGCTGTACAATCTG	tiling
6025as	MYNRL15	CGGGGCCAAACTGGTGAAGC	tiling
6034as	MYNRL15	CAGTAGCCCCGGGGCCAAAC	tiling
6040s	MYNRL15	GTCTGCCAGCTTCACCAGTT	tiling
6043as	MYNRL15	AGCGCCCCACAGTAGCCCCG	tiling
6044as	MYNRL15	AAGCGCCCCACAGTAGCCCC	tiling
6045as	MYNRL15	CAAGCGCCCCACAGTAGCCC	tiling
6046s	MYNRL15	CAGCTTCACCAGTTTGGCCC	tiling
6047s	MYNRL15	AGCTTCACCAGTTTGGCCCC	tiling
6048s	MYNRL15	GCTTCACCAGTTTGGCCCCG	tiling
6057s	MYNRL15	GTTTGGCCCCGGGGCTACTG	tiling
6058s	MYNRL15	TTTGGCCCCGGGGCTACTGT	tiling
6059s	MYNRL15	TTGGCCCCGGGGCTACTGTG	tiling
6070as	MYNRL15	GGAGAGAAAGAGGCTGCAGG	tiling
6073as	MYNRL15	GCTGGAGAGAAAGAGGCTGC	tiling
6091as	MYNRL15	TGACAAGACTCTGCCCAAGC	tiling
6097s	MYNRL15	CAGCCTCTTTCTCTCCAGCT	tiling
6098s	MYNRL15	AGCCTCTTTCTCTCCAGCTT	tiling
6121as	MYNRL15	AGTGCGGCGCCTGGTGGAGG	tiling
6124as	MYNRL15	ACAAGTGCGGCGCCTGGTGG	tiling
6127as	MYNRL15	GGCACAAGTGCGGCGCCTGG	tiling
6130as	MYNRL15	TGGGGCACAAGTGCGGCGCC	tiling
6132s	MYNRL15	CATCTGTTACCTCCTCCACC	tiling
6137as	MYNRL15	TACACTTTGGGGCACAAGTG	tiling
6148as	MYNRL15	TGAGGTGGAGCTACACTTTG	tiling
6149as	MYNRL15	ATGAGGTGGAGCTACACTTT	tiling
6150as	MYNRL15	GATGAGGTGGAGCTACACTT	tiling
6163as	MYNRL15	AGACACCACCCTGGATGAGG	tiling
6166as	MYNRL15	CACAGACACCACCCTGGATG	tiling
6172as	MYNRL15	GGAGGACACAGACACCACCC	tiling
6174s	MYNRL15	AGTGTAGCTCCACCTCATCC	tiling
6175s	MYNRL15	GTGTAGCTCCACCTCATCCA	tiling
6178s	MYNRL15	TAGCTCCACCTCATCCAGGG	tiling
6190as	MYNRL15	CCTGCTCCATGACACGGTGG	tiling
6193as	MYNRL15	GGCCCTGCTCCATGACACGG	tiling
6196as	MYNRL15	GGCGGCCCTGCTCCATGACA	tiling
6204s	MYNRL15	CTGTGTCCTCCACCGTGTCA	tiling
6210s	MYNRL15	CCTCCACCGTGTCATGGAGC	tiling
6211s	MYNRL15	CTCCACCGTGTCATGGAGCA	tiling
6214as	MYNRL15	AGTGGGAACTTGTCCCCAGG	tiling
6217as	MYNRL15	CTGAGTGGGAACTTGTCCCC	tiling
6219s	MYNRL15	TGTCATGGAGCAGGGCCGCC	tiling
6220s	MYNRL15	GTCATGGAGCAGGGCCGCCT	tiling
6221s	MYNRL15	TCATGGAGCAGGGCCGCCTG	tiling
6231as	MYNRL15	CTGACATCTCAGGGCTGAGT	tiling
6232as	MYNRL15	GCTGACATCTCAGGGCTGAG	tiling
6240as	MYNRL15	AACCCTTGGCTGACATCTCA	tiling
6241as	MYNRL15	CAACCCTTGGCTGACATCTC	tiling
6254as	MYNRL15	ATTCAGCAATGGGCAACCCT	tiling
6257s	MYNRL15	CAGCCCTGAGATGTCAGCCA	tiling
6258s	MYNRL15	AGCCCTGAGATGTCAGCCAA	tiling
6264as	MYNRL15	TAGGGGCCCCATTCAGCAAT	tiling
6265as	MYNRL15	TTAGGGGCCCCATTCAGCAA	tiling
6276s	MYNRL15	AAGGGTTGCCCATTGCTGAA	tiling
6277s	MYNRL15	AGGGTTGCCCATTGCTGAAT	tiling
6278s	MYNRL15	GGGTTGCCCATTGCTGAATG	tiling
6281as	MYNRL15	GAGCCTGGGATGGGGATTAG	tiling
6282as	MYNRL15	GGAGCCTGGGATGGGGATTA	tiling
6283as	MYNRL15	AGGAGCCTGGGATGGGGATT	tiling
6289as	MYNRL15	TCTGCCAGGAGCCTGGGATG	tiling
6290as	MYNRL15	CTCTGCCAGGAGCCTGGGAT	tiling
6291as	MYNRL15	TCTCTGCCAGGAGCCTGGGA	tiling
6295as	MYNRL15	CCCTTCTCTGCCAGGAGCCT	tiling
6296as	MYNRL15	CCCCTTCTCTGCCAGGAGCC	tiling
6298s	MYNRL15	GGGCCCCTAATCCCCATCCC	tiling
6303as	MYNRL15	AACTTTCCCCCTTCTCTGCC	tiling
6305s	MYNRL15	TAATCCCCATCCCAGGCTCC	tiling
6314s	MYNRL15	TCCCAGGCTCCTGGCAGAGA	tiling
6315s	MYNRL15	CCCAGGCTCCTGGCAGAGAA	tiling
6316s	MYNRL15	CCAGGCTCCTGGCAGAGAAG	tiling
6317s	MYNRL15	CAGGCTCCTGGCAGAGAAGG	tiling
6327as	MYNRL15	CACTGACATTGTGGTGTTAC	tiling
6336as	MYNRL15	GGCGGGAATCACTGACATTG	tiling
6353as	MYNRL15	CGGATCCTGACCCACGAGGC	tiling
6354as	MYNRL15	ACGGATCCTGACCCACGAGG	tiling
6357as	MYNRL15	GGCACGGATCCTGACCCACG	tiling
6362s	MYNRL15	TGTCAGTGATTCCCGCCTCG	tiling
6363s	MYNRL15	GTCAGTGATTCCCGCCTCGT	tiling
6368s	MYNRL15	TGATTCCCGCCTCGTGGGTC	tiling
6373as	MYNRL15	CCTCCCCGTCAGGTGTGGCA	tiling
6378as	MYNRL15	TTGCCCCTCCCCGTCAGGTG	tiling
6383as	MYNRL15	CTGCTTTGCCCCTCCCCGTC	tiling
6388s	MYNRL15	AGGATCCGTGCCACACCTGA	tiling
6389s	MYNRL15	GGATCCGTGCCACACCTGAC	tiling
6390s	MYNRL15	GATCCGTGCCACACCTGACG	tiling
6393s	MYNRL15	CCGTGCCACACCTGACGGGG	tiling
6394s	MYNRL15	CGTGCCACACCTGACGGGGA	tiling
6395s	MYNRL15	GTGCCACACCTGACGGGGAG	tiling
6404s	MYNRL15	CTGACGGGGAGGGGCAAAGC	tiling
6412s	MYNRL15	GAGGGGCAAAGCAGGAAGTC	tiling
6416s	MYNRL15	GGCAAAGCAGGAAGTCAGGT	tiling
6419s	MYNRL15	AAAGCAGGAAGTCAGGTCGG	tiling
6426as	MYNRL15	AACCCACAACACACCGCCTT	tiling
6427as	MYNRL15	AAACCCACAACACACCGCCT	tiling
6430s	MYNRL15	TCAGGTCGGAGGTAGTCCCA	tiling
6433s	MYNRL15	GGTCGGAGGTAGTCCCAAGG	tiling
6443s	MYNRL15	AGTCCCAAGGCGGTGTGTTG	tiling
6444s	MYNRL15	GTCCCAAGGCGGTGTGTTGT	tiling
6457as	MYNRL15	AGTCCACAAGGGGCCACATC	tiling
6467as	MYNRL15	AGCTAGTCAGAGTCCACAAG	tiling
6468as	MYNRL15	CAGCTAGTCAGAGTCCACAA	tiling
6469as	MYNRL15	CCAGCTAGTCAGAGTCCACA	tiling
6474s	MYNRL15	GAGCCAGATGTGGCCCCTTG	tiling
6489s	MYNRL15	CCTTGTGGACTCTGACTAGC	tiling
6490s	MYNRL15	CTTGTGGACTCTGACTAGCT	tiling
6496as	MYNRL15	GAGGGTAAGGTACTTGACCA	tiling
6499s	MYNRL15	TCTGACTAGCTGGGTGACCT	tiling
6509as	MYNRL15	CGGTTGGCTCCCAGAGGGTA	tiling
6514as	MYNRL15	TTTGTCGGTTGGCTCCCAGA	tiling
6515as	MYNRL15	CTTTGTCGGTTGGCTCCCAG	tiling
6519s	MYNRL15	TGGTCAAGTACCTTACCCTC	tiling
6520s	MYNRL15	GGTCAAGTACCTTACCCTCT	tiling
6525as	MYNRL15	TGATCGTTCCCTTTGTCGGT	tiling
6529as	MYNRL15	GGCATGATCGTTCCCTTTGT	tiling
6536s	MYNRL15	CTCTGGGAGCCAACCGACAA	tiling
6537s	MYNRL15	TCTGGGAGCCAACCGACAAA	tiling
6550as	MYNRL15	CTCATAACAATTGGAACGGT	tiling
6554as	MYNRL15	AAGCCTCATAACAATTGGAA	tiling
6559as	MYNRL15	CGTTTAAGCCTCATAACAAT	tiling
6571s	MYNRL15	CTACCGTTCCAATTGTTATG	tiling
6580s	MYNRL15	CAATTGTTATGAGGCTTAAA	tiling
6599s	MYNRL15	ACGGTATATCGCACTAAGCT	tiling
6600s	MYNRL15	CGGTATATCGCACTAAGCTT	tiling
6610s	MYNRL15	CACTAAGCTTGGGACAAAAC	tiling
6622s	MYNRL15	GACAAAACAGGTGCTCAATG	tiling
6631as	MYNRL15	GACTGGGAAGGAAACGTGGG	tiling
6632as	MYNRL15	GGACTGGGAAGGAAACGTGG	tiling
6633as	MYNRL15	GGGACTGGGAAGGAAACGTG	tiling
6634as	MYNRL15	GGGGACTGGGAAGGAAACGT	tiling
6635as	MYNRL15	TGGGGACTGGGAAGGAAACG	tiling
6643as	MYNRL15	CTGGGTGGTGGGGACTGGGA	tiling
6647as	MYNRL15	GCACCTGGGTGGTGGGGACT	tiling
6648as	MYNRL15	GGCACCTGGGTGGTGGGGAC	tiling
6653as	MYNRL15	GCTGCGGCACCTGGGTGGTG	tiling
6654as	MYNRL15	GGCTGCGGCACCTGGGTGGT	tiling
6655as	MYNRL15	CGGCTGCGGCACCTGGGTGG	tiling
6658as	MYNRL15	CGCCGGCTGCGGCACCTGGG	tiling
6661as	MYNRL15	GAGCGCCGGCTGCGGCACCT	tiling
6662as	MYNRL15	GGAGCGCCGGCTGCGGCACC	tiling
6664s	MYNRL15	CTTCCCAGTCCCCACCACCC	tiling
6669as	MYNRL15	CGGCCGCGGAGCGCCGGCTG	tiling
6675as	MYNRL15	GCGCGTCGGCCGCGGAGCGC	tiling
6676s	MYNRL15	CACCACCCAGGTGCCGCAGC	tiling
6683as	MYNRL15	ATCGGTGGGCGCGTCGGCCG	tiling
6686s	MYNRL15	GTGCCGCAGCCGGCGCTCCG	tiling
6689as	MYNRL15	CACCCCATCGGTGGGCGCGT	tiling
6697as	MYNRL15	ACATCAACCACCCCATCGGT	tiling
6698as	MYNRL15	TACATCAACCACCCCATCGG	tiling
6701as	MYNRL15	CCCTACATCAACCACCCCAT	tiling
6705s	MYNRL15	GCGGCCGACGCGCCCACCGA	tiling
6706s	MYNRL15	CGGCCGACGCGCCCACCGAT	tiling
6707s	MYNRL15	GGCCGACGCGCCCACCGATG	tiling
6710s	MYNRL15	CGACGCGCCCACCGATGGGG	tiling
6720s	MYNRL15	ACCGATGGGGTGGTTGATGT	tiling
6721s	MYNRL15	CCGATGGGGTGGTTGATGTA	tiling
6722s	MYNRL15	CGATGGGGTGGTTGATGTAG	tiling
6723s	MYNRL15	GATGGGGTGGTTGATGTAGG	tiling
6727as	MYNRL15	AGCGGCGGAAGGACCCCGAG	tiling
6728as	MYNRL15	CAGCGGCGGAAGGACCCCGA	tiling
6729as	MYNRL15	GCAGCGGCGGAAGGACCCCG	tiling
6732s	MYNRL15	GTTGATGTAGGGGGTCCCCT	tiling
6733s	MYNRL15	TTGATGTAGGGGGTCCCCTC	tiling
6734s	MYNRL15	TGATGTAGGGGGTCCCCTCG	tiling
6738as	MYNRL15	GCACCGGCAGCAGCGGCGGA	tiling
6742as	MYNRL15	GCAAGCACCGGCAGCAGCGG	tiling
6745as	MYNRL15	CTCGCAAGCACCGGCAGCAG	tiling
6754as	MYNRL15	ACTTCGCGGCTCGCAAGCAC	tiling
6755s	MYNRL15	GGTCCTTCCGCCGCTGCTGC	tiling
6768as	MYNRL15	GCTGGAGGCTGCCGACTTCG	tiling
6777s	MYNRL15	GTGCTTGCGAGCCGCGAAGT	tiling
6783as	MYNRL15	TGAGGCGGCGCAGCTGCTGG	tiling
6786as	MYNRL15	CTCTGAGGCGGCGCAGCTGC	tiling
6798as	MYNRL15	CCGCGCGATGGGCTCTGAGG	tiling
6801as	MYNRL15	CATCCGCGCGATGGGCTCTG	tiling
6809as	MYNRL15	GTCGGCCCCATCCGCGCGAT	tiling
6810as	MYNRL15	CGTCGGCCCCATCCGCGCGA	tiling
6818s	MYNRL15	CCGCCTCAGAGCCCATCGCG	tiling
6822s	MYNRL15	CTCAGAGCCCATCGCGCGGA	tiling
6823s	MYNRL15	TCAGAGCCCATCGCGCGGAT	tiling
6824s	MYNRL15	CAGAGCCCATCGCGCGGATG	tiling
6827as	MYNRL15	GCCCCTGCGGCCGCAGTCGT	tiling
6837s	MYNRL15	GCGGATGGGGCCGACGACTG	tiling
6840as	MYNRL15	ACGTTCCGTCCCTGCCCCTG	tiling
6844s	MYNRL15	GGGCCGACGACTGCGGCCGC	tiling
6845s	MYNRL15	GGCCGACGACTGCGGCCGCA	tiling
6846s	MYNRL15	GCCGACGACTGCGGCCGCAG	tiling
6850s	MYNRL15	ACGACTGCGGCCGCAGGGGC	tiling
6851s	MYNRL15	CGACTGCGGCCGCAGGGGCA	tiling
6855s	MYNRL15	TGCGGCCGCAGGGGCAGGGA	tiling
6871as	MYNRL15	CGGGCCTCCCCGGCGCCAGG	tiling
6872as	MYNRL15	CCGGGCCTCCCCGGCGCCAG	tiling
6873as	MYNRL15	CCCGGGCCTCCCCGGCGCCA	tiling
6874as	MYNRL15	CCCCGGGCCTCCCCGGCGCC	tiling
6876s	MYNRL15	GGAACGTTTACAGCGCCCCC	tiling
6881as	MYNRL15	CCACGATCCCCGGGCCTCCC	tiling
6882s	MYNRL15	TTTACAGCGCCCCCTGGCGC	tiling
6883s	MYNRL15	TTACAGCGCCCCCTGGCGCC	tiling
6884s	MYNRL15	TACAGCGCCCCCTGGCGCCG	tiling
6887s	MYNRL15	AGCGCCCCCTGGCGCCGGGG	tiling
6890as	MYNRL15	AATTAGCCTCCACGATCCCC	tiling
6891as	MYNRL15	GAATTAGCCTCCACGATCCC	tiling
6892s	MYNRL15	CCCCTGGCGCCGGGGAGGCC	tiling
6893s	MYNRL15	CCCTGGCGCCGGGGAGGCCC	tiling
6894s	MYNRL15	CCTGGCGCCGGGGAGGCCCG	tiling
6901s	MYNRL15	CCGGGGAGGCCCGGGGATCG	tiling
6904s	MYNRL15	GGGAGGCCCGGGGATCGTGG	tiling
6916s	MYNRL15	GATCGTGGAGGCTAATTCAG	tiling
6917s	MYNRL15	ATCGTGGAGGCTAATTCAGC	tiling
6920as	MYNRL15	CATCTGGGGCAGGCCCAACT	tiling
6926s	MYNRL15	GCTAATTCAGCGGGCCGAGT	tiling
6927s	MYNRL15	CTAATTCAGCGGGCCGAGTT	tiling
6930as	MYNRL15	CAGAGGAATTCATCTGGGGC	tiling
6934as	MYNRL15	GCTCCAGAGGAATTCATCTG	tiling
6935as	MYNRL15	AGCTCCAGAGGAATTCATCT	tiling
6936as	MYNRL15	CAGCTCCAGAGGAATTCATC	tiling
6947as	MYNRL15	CGCGGGCCGGTCAGCTCCAG	tiling
6951s	MYNRL15	CTGCCCCAGATGAATTCCTC	tiling
6960as	MYNRL15	CACTTGCTCTCTGCGCGGGC	tiling
6961s	MYNRL15	TGAATTCCTCTGGAGCTGAC	tiling
6964as	MYNRL15	ACATCACTTGCTCTCTGCGC	tiling
6965as	MYNRL15	CACATCACTTGCTCTCTGCG	tiling
6986s	MYNRL15	CGCGCAGAGAGCAAGTGATG	tiling
6996as	MYNRL15	GCTGGGGGCTGCGATGCTGA	tiling
7011as	MYNRL15	AACAGAGCACACTGAGCTGG	tiling
7012as	MYNRL15	CAACAGAGCACACTGAGCTG	tiling
7013as	MYNRL15	CCAACAGAGCACACTGAGCT	tiling
7014as	MYNRL15	CCCAACAGAGCACACTGAGC	tiling
7033s	MYNRL15	CCCAGCTCAGTGTGCTCTGT	tiling
7034s	MYNRL15	CCAGCTCAGTGTGCTCTGTT	tiling
7035s	MYNRL15	CAGCTCAGTGTGCTCTGTTG	tiling
7036s	MYNRL15	AGCTCAGTGTGCTCTGTTGG	tiling
7056as	MYNRL15	CTGTGGGCTCCCAAAGAGCC	tiling
7058s	MYNRL15	GTGCAAGAAGAACATAAGCC	tiling
7066s	MYNRL15	AGAACATAAGCCTGGCTCTT	tiling
7067s	MYNRL15	GAACATAAGCCTGGCTCTTT	tiling
7083s	MYNRL15	CTTTGGGAGCCCACAGTCTG	tiling
7091s	MYNRL15	GCCCACAGTCTGTGGAAAAG	tiling
7111s	MYNRL15	AGGAAGACAGACAAGAAATA	tiling
7117s	MYNRL15	ACAGACAAGAAATAAGGCAG	tiling
7120as	MYNRL15	CCTGGATTCAGAGCACTGTG	tiling
7138as	MYNRL15	CCCCTGAGCCTTGGCCACCC	tiling
7140s	MYNRL15	CCTCACAGTGCTCTGAATCC	tiling
7141s	MYNRL15	CTCACAGTGCTCTGAATCCA	tiling
7144s	MYNRL15	ACAGTGCTCTGAATCCAGGG	tiling
7147as	MYNRL15	TCCCATAGTCCCCTGAGCCT	tiling
7150s	MYNRL15	CTCTGAATCCAGGGTGGCCA	tiling
7156s	MYNRL15	ATCCAGGGTGGCCAAGGCTC	tiling
7157s	MYNRL15	TCCAGGGTGGCCAAGGCTCA	tiling
7158s	MYNRL15	CCAGGGTGGCCAAGGCTCAG	tiling
7165s	MYNRL15	GGCCAAGGCTCAGGGGACTA	tiling
7166s	MYNRL15	GCCAAGGCTCAGGGGACTAT	tiling
7171s	MYNRL15	GGCTCAGGGGACTATGGGAG	tiling
7172s	MYNRL15	GCTCAGGGGACTATGGGAGC	tiling
7188as	MYNRL15	TCTCTGACTCTGAGGGTGTG	tiling
7189as	MYNRL15	GTCTCTGACTCTGAGGGTGT	tiling
7190as	MYNRL15	TGTCTCTGACTCTGAGGGTG	tiling
7195as	MYNRL15	GAAGCTGTCTCTGACTCTGA	tiling
7196as	MYNRL15	AGAAGCTGTCTCTGACTCTG	tiling
7219as	MYNRL15	GGTTCTTGGGGGGAGCTTCT	tiling
7220as	MYNRL15	TGGTTCTTGGGGGGAGCTTC	tiling
7229as	MYNRL15	GGTTGAAGATGGTTCTTGGG	tiling
7230as	MYNRL15	AGGTTGAAGATGGTTCTTGG	tiling
7231as	MYNRL15	CAGGTTGAAGATGGTTCTTG	tiling
7232as	MYNRL15	ACAGGTTGAAGATGGTTCTT	tiling
7233as	MYNRL15	TACAGGTTGAAGATGGTTCT	tiling
7296as	MYNRL15	GAACCTGGCCCATCCCTACA	tiling
7297as	MYNRL15	AGAACCTGGCCCATCCCTAC	tiling
7302s	MYNRL15	CTAAAAATAGTTCTCCCTGT	tiling
7303s	MYNRL15	TAAAAATAGTTCTCCCTGTA	tiling
7307s	MYNRL15	AATAGTTCTCCCTGTAGGGA	tiling
7308s	MYNRL15	ATAGTTCTCCCTGTAGGGAT	tiling
7311as	MYNRL15	ACTCCCCTGCCCACAGAACC	tiling
7313s	MYNRL15	TCTCCCTGTAGGGATGGGCC	tiling
7321s	MYNRL15	TAGGGATGGGCCAGGTTCTG	tiling
7322s	MYNRL15	AGGGATGGGCCAGGTTCTGT	tiling
7326s	MYNRL15	ATGGGCCAGGTTCTGTGGGC	tiling
7327s	MYNRL15	TGGGCCAGGTTCTGTGGGCA	tiling
7328s	MYNRL15	GGGCCAGGTTCTGTGGGCAG	tiling
7337as	MYNRL15	GGGTCTCCTGGAGGGTCCAA	tiling
7341s	MYNRL15	TGGGCAGGGGAGTCTACCTT	tiling
7345as	MYNRL15	AGGCCCTAGGGTCTCCTGGA	tiling
7346as	MYNRL15	CAGGCCCTAGGGTCTCCTGG	tiling
7349as	MYNRL15	GGTCAGGCCCTAGGGTCTCC	tiling
7351s	MYNRL15	AGTCTACCTTTGGACCCTCC	tiling
7361s	MYNRL15	TGGACCCTCCAGGAGACCCT	tiling
7362s	MYNRL15	GGACCCTCCAGGAGACCCTA	tiling
7385as	MYNRL15	TTAGGCAGGGCTCCCAGGGA	tiling
7389as	MYNRL15	GCAATTAGGCAGGGCTCCCA	tiling
7390as	MYNRL15	AGCAATTAGGCAGGGCTCCC	tiling
7392s	MYNRL15	TGAAAAATCAGAGCCTTCCC	tiling
7393s	MYNRL15	GAAAAATCAGAGCCTTCCCT	tiling
7398as	MYNRL15	AAGTCTGAAGCAATTAGGCA	tiling
7399as	MYNRL15	TAAGTCTGAAGCAATTAGGC	tiling
7403as	MYNRL15	AGCCTAAGTCTGAAGCAATT	tiling
7421s	MYNRL15	TGCCTAATTGCTTCAGACTT	tiling
7426as	MYNRL15	CAGAAACGTCACAGCTACCT	tiling
7427as	MYNRL15	GCAGAAACGTCACAGCTACC	tiling
7429s	MYNRL15	TGCTTCAGACTTAGGCTCCC	tiling
7450s	MYNRL15	GGTAGCTGTGACGTTTCTGC	tiling
7458as	MYNRL15	GCAACACTGAGGACAAACAA	tiling
7469as	MYNRL15	AAATTTCATCTGCAACACTG	tiling
7493as	MYNRL15	TCTCATAGCATAAGAAGACA	tiling
7519as	MYNRL15	AGATGCCTAGAGACTGAAAT	tiling
7534s	MYNRL15	GAGCTCCTATTTCAGTCTCT	tiling
7546s	MYNRL15	CAGTCTCTAGGCATCTTCTG	tiling
7547s	MYNRL15	AGTCTCTAGGCATCTTCTGT	tiling
7550as	MYNRL15	GACAACACTCATCACCCCAG	tiling
7551as	MYNRL15	TGACAACACTCATCACCCCA	tiling
7552as	MYNRL15	GTGACAACACTCATCACCCC	tiling
7554s	MYNRL15	AGGCATCTTCTGTGGGCCCC	tiling
7555s	MYNRL15	GGCATCTTCTGTGGGCCCCT	tiling
7556s	MYNRL15	GCATCTTCTGTGGGCCCCTG	tiling
7581as	MYNRL15	CCTGACAACATCATGCTCCC	tiling
7583s	MYNRL15	GAGTGTTGTCACTGCTGTCC	tiling
7584s	MYNRL15	AGTGTTGTCACTGCTGTCCT	tiling
7601s	MYNRL15	CCTGGGAGCATGATGTTGTC	tiling
7604as	MYNRL15	TGTTATTCCAGTGCCTACCC	tiling
7606s	MYNRL15	GAGCATGATGTTGTCAGGCC	tiling
7607s	MYNRL15	AGCATGATGTTGTCAGGCCT	tiling
7611s	MYNRL15	TGATGTTGTCAGGCCTGGGT	tiling
7617s	MYNRL15	TGTCAGGCCTGGGTAGGCAC	tiling
7638s	MYNRL15	GGAATAACACTTAATTCTGC	tiling
7642s	MYNRL15	TAACACTTAATTCTGCTGGC	tiling
7645s	MYNRL15	CACTTAATTCTGCTGGCTGG	tiling
7648as	MYNRL15	AGGCAGGGAATTTCTCCAGA	tiling
7653s	MYNRL15	TCTGCTGGCTGGTGGCCTTC	tiling
7663as	MYNRL15	CCTCAGCTGCCCCTAAGGCA	tiling
7664as	MYNRL15	CCCTCAGCTGCCCCTAAGGC	tiling
7668as	MYNRL15	TTACCCCTCAGCTGCCCCTA	tiling
7672s	MYNRL15	CTGGAGAAATTCCCTGCCTT	tiling
7673s	MYNRL15	TGGAGAAATTCCCTGCCTTA	tiling
7674s	MYNRL15	GGAGAAATTCCCTGCCTTAG	tiling
7683s	MYNRL15	CCCTGCCTTAGGGGCAGCTG	tiling
7684s	MYNRL15	CCTGCCTTAGGGGCAGCTGA	tiling
7685s	MYNRL15	CTGCCTTAGGGGCAGCTGAG	tiling
7697as	MYNRL15	GAAGTTCTATGGGGATCACC	tiling
7699s	MYNRL15	GCTGAGGGGTAAGAGAGACC	tiling
7706as	MYNRL15	TCTCACAGAGAAGTTCTATG	tiling
7707as	MYNRL15	CTCTCACAGAGAAGTTCTAT	tiling
7708as	MYNRL15	CCTCTCACAGAGAAGTTCTA	tiling
7728s	MYNRL15	CCATAGAACTTCTCTGTGAG	tiling
7729s	MYNRL15	CATAGAACTTCTCTGTGAGA	tiling
7730s	MYNRL15	ATAGAACTTCTCTGTGAGAG	tiling
7731s	MYNRL15	TAGAACTTCTCTGTGAGAGG	tiling
7736as	MYNRL15	TAGAGTATACTTAGCTAATA	tiling
7737as	MYNRL15	TTAGAGTATACTTAGCTAAT	tiling
7794s	MYNRL15	TTTGTGTTCTGGCTGGTAGC	tiling
7795s	MYNRL15	TTGTGTTCTGGCTGGTAGCT	tiling
7796s	MYNRL15	TGTGTTCTGGCTGGTAGCTG	tiling
7805s	MYNRL15	GCTGGTAGCTGGGGCAGATA	tiling
7811s	MYNRL15	AGCTGGGGCAGATAAGGCTC	tiling
7812s	MYNRL15	GCTGGGGCAGATAAGGCTCA	tiling
7813s	MYNRL15	CTGGGGCAGATAAGGCTCAG	tiling
7818s	MYNRL15	GCAGATAAGGCTCAGGGGAA	tiling
7829s	MYNRL15	TCAGGGGAAAGGCTAATGAA	tiling
7841s	MYNRL15	CTAATGAAAGGAGTCACCCT	tiling
7837as	MYNRL15	CAAGACTAGCTGAAAACCAA	tiling
7838as	MYNRL15	CCAAGACTAGCTGAAAACCA	tiling
7867as	MYNRL15	CCTCCCTAACCTCTGCTACG	tiling
7878s	MYNRL15	TGGTGGTTGCCACGTAGCAG	tiling
7883s	MYNRL15	GTTGCCACGTAGCAGAGGTT	tiling
7884s	MYNRL15	TTGCCACGTAGCAGAGGTTA	tiling
7887s	MYNRL15	CCACGTAGCAGAGGTTAGGG	tiling
7888s	MYNRL15	CACGTAGCAGAGGTTAGGGA	tiling
7894as	MYNRL15	GACCTCAGTTCCAGCATGTG	tiling
7895as	MYNRL15	AGACCTCAGTTCCAGCATGT	tiling
7896as	MYNRL15	GAGACCTCAGTTCCAGCATG	tiling
7904s	MYNRL15	GGGAGGGAAGCCCCACATGC	tiling
7912s	MYNRL15	AGCCCCACATGCTGGAACTG	tiling
7919s	MYNRL15	CATGCTGGAACTGAGGTCTC	tiling
7920s	MYNRL15	ATGCTGGAACTGAGGTCTCT	tiling
7924as	MYNRL15	AATTCTGACCCTCCTATTTC	tiling
7932s	MYNRL15	AGGTCTCTGGGACCTGAAAT	tiling
7935s	MYNRL15	TCTCTGGGACCTGAAATAGG	tiling
7936s	MYNRL15	CTCTGGGACCTGAAATAGGA	tiling
7947as	MYNRL15	CAGGCTGCCATGGAAGCTCT	tiling
7948as	MYNRL15	CCAGGCTGCCATGGAAGCTC	tiling
7957as	MYNRL15	CTCCAACTTCCAGGCTGCCA	tiling
7960s	MYNRL15	CAGAATTCCCAGAGCTTCCA	tiling
7966as	MYNRL15	CTACCCATTCTCCAACTTCC	tiling
7968s	MYNRL15	CCAGAGCTTCCATGGCAGCC	tiling
7975s	MYNRL15	TTCCATGGCAGCCTGGAAGT	tiling
7982s	MYNRL15	GCAGCCTGGAAGTTGGAGAA	tiling
7983s	MYNRL15	CAGCCTGGAAGTTGGAGAAT	tiling
7998s	MYNRL15	AGAATGGGTAGAAACATATT	tiling
8031s	MYNRL15	TTGTTTGTTCTTCATACTAA	tiling
8051as	MYNRL15	AGGACTAGAGGACAGAATGA	tiling
8052as	MYNRL15	AAGGACTAGAGGACAGAATG	tiling
8063as	MYNRL15	GAGAAGGCTCAAAGGACTAG	tiling
8071as	MYNRL15	CTGAAGGAGAGAAGGCTCAA	tiling
8079as	MYNRL15	CCAAACTGCTGAAGGAGAGA	tiling
8087as	MYNRL15	CTGCATTGCCAAACTGCTGA	tiling
8099s	MYNRL15	CCTTCTCTCCTTCAGCAGTT	tiling
8108s	MYNRL15	CTTCAGCAGTTTGGCAATGC	tiling
8111as	MYNRL15	GTCTCCTGTTGGAAAACGTG	tiling
8112as	MYNRL15	TGTCTCCTGTTGGAAAACGT	tiling
8113as	MYNRL15	CTGTCTCCTGTTGGAAAACG	tiling
8122as	MYNRL15	ACTGGGTTTCTGTCTCCTGT	tiling
8139as	MYNRL15	AGAGAGAGATGACAGGGACT	tiling
8140as	MYNRL15	TAGAGAGAGATGACAGGGAC	tiling
8167as	MYNRL15	GCCTGAAGCTTCTCTATCAC	tiling
8186s	MYNRL15	GCCTGTGATAGAGAAGCTTC	tiling
8199s	MYNRL15	AAGCTTCAGGCTCGTATTAA	tiling
8204as	MYNRL15	GTCAAAGCCCCAAGGCCCTT	tiling
8205as	MYNRL15	AGTCAAAGCCCCAAGGCCCT	tiling
8208s	MYNRL15	GCTCGTATTAATGGTGCCCA	tiling
8209s	MYNRL15	CTCGTATTAATGGTGCCCAA	tiling
8212as	MYNRL15	AAATAAAAGTCAAAGCCCCA	tiling
8215s	MYNRL15	TTAATGGTGCCCAAGGGCCT	tiling
8216s	MYNRL15	TAATGGTGCCCAAGGGCCTT	tiling
8217s	MYNRL15	AATGGTGCCCAAGGGCCTTG	tiling
8235as	MYNRL15	GGCCGTGACTGCAGACAATA	tiling
8253s	MYNRL15	TTCCTTATTGTCTGCAGTCA	tiling
8256as	MYNRL15	ACCCCAACATCTCTCTTTCT	tiling
8273s	MYNRL15	CGGCCTAGAAAGAGAGATGT	tiling
8274s	MYNRL15	GGCCTAGAAAGAGAGATGTT	tiling
8275s	MYNRL15	GCCTAGAAAGAGAGATGTTG	tiling
8280as	MYNRL15	ACCACCTCTGTCCTGGTCCT	tiling
8281as	MYNRL15	TACCACCTCTGTCCTGGTCC	tiling
8283s	MYNRL15	AGAGAGATGTTGGGGTTCCC	tiling
8287as	MYNRL15	GTTCACTACCACCTCTGTCC	tiling
8289s	MYNRL15	ATGTTGGGGTTCCCAGGACC	tiling
8296s	MYNRL15	GGTTCCCAGGACCAGGACAG	tiling
8299s	MYNRL15	TCCCAGGACCAGGACAGAGG	tiling
8315s	MYNRL15	GAGGTGGTAGTGAACTCTCA	tiling
8316s	MYNRL15	AGGTGGTAGTGAACTCTCAT	tiling
8322as	MYNRL15	GCAAGGGGCCTGACCTTCTC	tiling
8329s	MYNRL15	CTCTCATGGGCATCCAGAGA	tiling
8334s	MYNRL15	ATGGGCATCCAGAGAAGGTC	tiling
8337as	MYNRL15	CAGATAGGCCTGTCAGCAAG	tiling
8338as	MYNRL15	ACAGATAGGCCTGTCAGCAA	tiling
8339as	MYNRL15	CACAGATAGGCCTGTCAGCA	tiling
8349s	MYNRL15	AGGTCAGGCCCCTTGCTGAC	tiling
8352as	MYNRL15	GCAGCAGTAGCCCCACAGAT	tiling
8360s	MYNRL15	CTTGCTGACAGGCCTATCTG	tiling
8361s	MYNRL15	TTGCTGACAGGCCTATCTGT	tiling
8362s	MYNRL15	TGCTGACAGGCCTATCTGTG	tiling
8383s	MYNRL15	GGCTACTGCTGCTCTTCAGC	tiling
8384s	MYNRL15	GCTACTGCTGCTCTTCAGCT	tiling
8390as	MYNRL15	GAGAGAGGTTGGCTGGACAA	tiling
8391as	MYNRL15	AGAGAGAGGTTGGCTGGACA	tiling
8397as	MYNRL15	TACCTGAGAGAGAGGTTGGC	tiling
8401as	MYNRL15	GCTGTACCTGAGAGAGAGGT	tiling
8405as	MYNRL15	AAGTGCTGTACCTGAGAGAG	tiling
8415s	MYNRL15	GTCCAGCCAACCTCTCTCTC	tiling
8429as	MYNRL15	CAGAGGCAGGTGGGCCACAG	tiling
8430as	MYNRL15	CCAGAGGCAGGTGGGCCACA	tiling
8431as	MYNRL15	ACCAGAGGCAGGTGGGCCAC	tiling
8435s	MYNRL15	AGGTACAGCACTTACCCCTG	tiling
8438as	MYNRL15	CCATAGCACCAGAGGCAGGT	tiling
8439as	MYNRL15	CCCATAGCACCAGAGGCAGG	tiling
8442as	MYNRL15	TAGCCCATAGCACCAGAGGC	tiling
8446as	MYNRL15	GGAATAGCCCATAGCACCAG	tiling
8450s	MYNRL15	CCCTGTGGCCCACCTGCCTC	tiling
8458s	MYNRL15	CCCACCTGCCTCTGGTGCTA	tiling
8459s	MYNRL15	CCACCTGCCTCTGGTGCTAT	tiling
8467as	MYNRL15	CCCCATCAGTTCCAGTTCCC	tiling
8469s	MYNRL15	CTGGTGCTATGGGCTATTCC	tiling
8470s	MYNRL15	TGGTGCTATGGGCTATTCCT	tiling
8476s	MYNRL15	TATGGGCTATTCCTGGGAAC	tiling
8485s	MYNRL15	TTCCTGGGAACTGGAACTGA	tiling
8486s	MYNRL15	TCCTGGGAACTGGAACTGAT	tiling
8487s	MYNRL15	CCTGGGAACTGGAACTGATG	tiling
8491s	MYNRL15	GGAACTGGAACTGATGGGGA	tiling
8492s	MYNRL15	GAACTGGAACTGATGGGGAT	tiling
8495s	MYNRL15	CTGGAACTGATGGGGATGGG	tiling
8499s	MYNRL15	AACTGATGGGGATGGGTGGA	tiling
8500s	MYNRL15	ACTGATGGGGATGGGTGGAA	tiling
8541as	MYNRL15	ACAGCTCACTCCACCCCTAC	tiling
8563s	MYNRL15	AGTAGGGGTGGAGTGAGCTG	tiling
8568s	MYNRL15	GGGTGGAGTGAGCTGTGGAA	tiling
8571as	MYNRL15	GTGCTAGAGACAAGCAGGAG	tiling
8572as	MYNRL15	GGTGCTAGAGACAAGCAGGA	tiling
8573as	MYNRL15	GGGTGCTAGAGACAAGCAGG	tiling
8576as	MYNRL15	TGGGGGTGCTAGAGACAAGC	tiling
8593as	MYNRL15	AGAGCTGAAGAGAGAGGTGG	tiling
8594as	MYNRL15	CAGAGCTGAAGAGAGAGGTG	tiling
8595as	MYNRL15	CCAGAGCTGAAGAGAGAGGT	tiling
8596as	MYNRL15	ACCAGAGCTGAAGAGAGAGG	tiling
8599as	MYNRL15	TGGACCAGAGCTGAAGAGAG	tiling
8615s	MYNRL15	CCCACCTCTCTCTTCAGCTC	tiling
8619as	MYNRL15	TCTGGCACAAGTGAGGGTGG	tiling
8622as	MYNRL15	TGGTCTGGCACAAGTGAGGG	tiling
8625as	MYNRL15	GGGTGGTCTGGCACAAGTGA	tiling
8626as	MYNRL15	CGGGTGGTCTGGCACAAGTG	tiling
8637as	MYNRL15	CATGGACATCCCGGGTGGTC	tiling
8642as	MYNRL15	ACGGCCATGGACATCCCGGG	tiling
8645as	MYNRL15	GTGACGGCCATGGACATCCC	tiling
8646as	MYNRL15	AGTGACGGCCATGGACATCC	tiling
8647s	MYNRL15	CTCACTTGTGCCAGACCACC	tiling
8648s	MYNRL15	TCACTTGTGCCAGACCACCC	tiling
8655as	MYNRL15	AACCAGGGTAGTGACGGCCA	tiling
8658s	MYNRL15	CAGACCACCCGGGATGTCCA	tiling
8661as	MYNRL15	AAAAGAAACCAGGGTAGTGA	tiling
8670as	MYNRL15	GACGAGGGCAAAAGAAACCA	tiling
8671as	MYNRL15	AGACGAGGGCAAAAGAAACC	tiling
8673s	MYNRL15	GTCCATGGCCGTCACTACCC	tiling
8685as	MYNRL15	CTGGAGAATCAGACAGACGA	tiling
8686as	MYNRL15	TCTGGAGAATCAGACAGACG	tiling
8704as	MYNRL15	TGGCAGCAGTAGGCTTCCTC	tiling
8708s	MYNRL15	TCGTCTGTCTGATTCTCCAG	tiling
8714as	MYNRL15	AGCCTGCAGGTGGCAGCAGT	tiling
8724as	MYNRL15	AGCCCCCTGCAGCCTGCAGG	tiling
8727as	MYNRL15	AGGAGCCCCCTGCAGCCTGC	tiling
8732s	MYNRL15	AGCCTACTGCTGCCACCTGC	tiling
8739s	MYNRL15	TGCTGCCACCTGCAGGCTGC	tiling
8740s	MYNRL15	GCTGCCACCTGCAGGCTGCA	tiling
8741s	MYNRL15	CTGCCACCTGCAGGCTGCAG	tiling
8742s	MYNRL15	TGCCACCTGCAGGCTGCAGG	tiling
8747as	MYNRL15	AAATTCAGCCCGGGTGCAGC	tiling
8756as	MYNRL15	CAGGGCCTCAAATTCAGCCC	tiling
8757as	MYNRL15	ACAGGGCCTCAAATTCAGCC	tiling
8758s	MYNRL15	CAGGGGGCTCCTGCTGCACC	tiling
8759s	MYNRL15	AGGGGGCTCCTGCTGCACCC	tiling
8771s	MYNRL15	CTGCACCCGGGCTGAATTTG	tiling
8774as	MYNRL15	GGACAGATTGACTTGGTACA	tiling
8775as	MYNRL15	CGGACAGATTGACTTGGTAC	tiling
8781as	MYNRL15	GAAGAGCGGACAGATTGACT	tiling
8795as	MYNRL15	GATGGGCGGGGGCGGAAGAG	tiling
8803as	MYNRL15	CACCTGAGGATGGGCGGGGG	tiling
8806as	MYNRL15	TCTCACCTGAGGATGGGCGG	tiling
8807as	MYNRL15	ATCTCACCTGAGGATGGGCG	tiling
8808as	MYNRL15	GATCTCACCTGAGGATGGGC	tiling
8809as	MYNRL15	AGATCTCACCTGAGGATGGG	tiling
8812as	MYNRL15	TGGAGATCTCACCTGAGGAT	tiling
8813as	MYNRL15	TTGGAGATCTCACCTGAGGA	tiling
8817as	MYNRL15	GGGGTTGGAGATCTCACCTG	tiling
8821s	MYNRL15	TTCCGCCCCCGCCCATCCTC	tiling
8832as	MYNRL15	TGTTCCAGTGGCTCTGGGGT	tiling
8836as	MYNRL15	TCGATGTTCCAGTGGCTCTG	tiling
8837as	MYNRL15	GTCGATGTTCCAGTGGCTCT	tiling
8838as	MYNRL15	TGTCGATGTTCCAGTGGCTC	tiling
8844as	MYNRL15	ACACCCTGTCGATGTTCCAG	tiling
8848s	MYNRL15	ATCTCCAACCCCAGAGCCAC	tiling
8860s	MYNRL15	AGAGCCACTGGAACATCGAC	tiling
8861s	MYNRL15	GAGCCACTGGAACATCGACA	tiling
8868as	MYNRL15	AGGAACAGAGCCCCAGATAC	tiling
8876s	MYNRL15	CGACAGGGTGTTCCAGTATC	tiling
8877s	MYNRL15	GACAGGGTGTTCCAGTATCT	tiling
8878s	MYNRL15	ACAGGGTGTTCCAGTATCTG	tiling
8888as	MYNRL15	AGCCTACCACCCCATAATTT	tiling
8897s	MYNRL15	GGGGCTCTGTTCCTAAATTA	tiling
8898s	MYNRL15	GGGCTCTGTTCCTAAATTAT	tiling
8899s	MYNRL15	GGCTCTGTTCCTAAATTATG	tiling
8902s	MYNRL15	TCTGTTCCTAAATTATGGGG	tiling
8906s	MYNRL15	TTCCTAAATTATGGGGTGGT	tiling
8931s	MYNRL15	TGTAACTTACAGACTAGTGA	tiling
8932s	MYNRL15	GTAACTTACAGACTAGTGAA	tiling
8980s	MYNRL15	GATCATGATTACAATTACAA	tiling
8991s	MYNRL15	CAATTACAAAGGAGAAGTTC	tiling
8992s	MYNRL15	AATTACAAAGGAGAAGTTCA	tiling
8993s	MYNRL15	ATTACAAAGGAGAAGTTCAG	tiling
8994s	MYNRL15	TTACAAAGGAGAAGTTCAGG	tiling
9007s	MYNRL15	GTTCAGGGGGCTGTGCAAGC	tiling
9013s	MYNRL15	GGGGCTGTGCAAGCTGGTAA	tiling
9014s	MYNRL15	GGGCTGTGCAAGCTGGTAAT	tiling
9015s	MYNRL15	GGCTGTGCAAGCTGGTAATG	tiling
9020as	MYNRL15	ACCCATGGGCAGATTCAGGA	tiling
9024as	MYNRL15	AGCCACCCATGGGCAGATTC	tiling
9034as	MYNRL15	CTCATCCTAGAGCCACCCAT	tiling
9035as	MYNRL15	GCTCATCCTAGAGCCACCCA	tiling
9038s	MYNRL15	AGCCATCCTGAATCTGCCCA	tiling
9039s	MYNRL15	GCCATCCTGAATCTGCCCAT	tiling
9042s	MYNRL15	ATCCTGAATCTGCCCATGGG	tiling
9049s	MYNRL15	ATCTGCCCATGGGTGGCTCT	tiling
9059as	MYNRL15	ACACATTTGCATACGAATTT	tiling
9103s	MYNRL15	TATGTAAGACGACACTTATT	tiling
9104s	MYNRL15	ATGTAAGACGACACTTATTT	tiling
9105s	MYNRL15	TGTAAGACGACACTTATTTG	tiling
9108s	MYNRL15	AAGACGACACTTATTTGGGG	tiling
9109s	MYNRL15	AGACGACACTTATTTGGGGA	tiling
9115as	MYNRL15	TGGGAGTCCGGAGAAAGCTC	tiling
9127as	MYNRL15	GTACAGAATCCCTGGGAGTC	tiling
9128s	MYNRL15	AGGGAGTCCTGAGCTTTCTC	tiling
9134as	MYNRL15	GTGGGGGGTACAGAATCCCT	tiling
9135as	MYNRL15	TGTGGGGGGTACAGAATCCC	tiling
9137s	MYNRL15	TGAGCTTTCTCCGGACTCCC	tiling
9138s	MYNRL15	GAGCTTTCTCCGGACTCCCA	tiling
9149as	MYNRL15	TCGCTGCTGCGCTCTGTGGG	tiling
9150as	MYNRL15	CTCGCTGCTGCGCTCTGTGG	tiling
9151as	MYNRL15	TCTCGCTGCTGCGCTCTGTG	tiling
9152as	MYNRL15	CTCTCGCTGCTGCGCTCTGT	tiling
9153as	MYNRL15	GCTCTCGCTGCTGCGCTCTG	tiling
9177s	MYNRL15	AGAGCGCAGCAGCGAGAGCG	tiling
9181s	MYNRL15	CGCAGCAGCGAGAGCGCGGT	tiling
9182s	MYNRL15	GCAGCAGCGAGAGCGCGGTC	tiling
9183s	MYNRL15	CAGCAGCGAGAGCGCGGTCG	tiling
9186as	MYNRL15	GAGAAAAAGTATCTGGATCC	tiling
9187s	MYNRL15	AGCGAGAGCGCGGTCGGGGC	tiling
9188s	MYNRL15	GCGAGAGCGCGGTCGGGGCC	tiling
9193as	MYNRL15	TGCGGGAGAGAAAAAGTATC	tiling
9210as	MYNRL15	GAGCGGGCCTGGGCCCCTGC	tiling
9211as	MYNRL15	GGAGCGGGCCTGGGCCCCTG	tiling
9220as	MYNRL15	CCAGCACTAGGAGCGGGCCT	tiling
9221as	MYNRL15	CCCAGCACTAGGAGCGGGCC	tiling
9223s	MYNRL15	TTTCTCTCCCGCAGGGGCCC	tiling
9226as	MYNRL15	AGAGGCCCAGCACTAGGAGC	tiling
9227as	MYNRL15	TAGAGGCCCAGCACTAGGAG	tiling
9232as	MYNRL15	GGTTGTAGAGGCCCAGCACT	tiling
9240s	MYNRL15	CCCAGGCCCGCTCCTAGTGC	tiling
9241s	MYNRL15	CCAGGCCCGCTCCTAGTGCT	tiling
9244as	MYNRL15	TCACAACCAGTAGGTTGTAG	tiling
9253as	MYNRL15	TCATCAGGGTCACAACCAGT	tiling
9258s	MYNRL15	GCTGGGCCTCTACAACCTAC	tiling
9267as	MYNRL15	CACGAGGTCTACGGTCATCA	tiling
9268as	MYNRL15	GCACGAGGTCTACGGTCATC	tiling
9276as	MYNRL15	GCAGAAGTGCACGAGGTCTA	tiling
9283as	MYNRL15	GACCGCAGCAGAAGTGCACG	tiling
9301s	MYNRL15	GACCTCGTGCACTTCTGCTG	tiling
9305s	MYNRL15	TCGTGCACTTCTGCTGCGGT	tiling
9306s	MYNRL15	CGTGCACTTCTGCTGCGGTC	tiling
9307s	MYNRL15	GTGCACTTCTGCTGCGGTCG	tiling
9310as	MYNRL15	GGTGGCTCCAGCCCAGACTC	tiling
9311s	MYNRL15	ACTTCTGCTGCGGTCGGGGC	tiling
9318s	MYNRL15	CTGCGGTCGGGGCCGGAGTC	tiling
9319s	MYNRL15	TGCGGTCGGGGCCGGAGTCT	tiling
9323s	MYNRL15	GTCGGGGCCGGAGTCTGGGC	tiling
9328as	MYNRL15	ACCCAGAGGGAGGCCTGCGG	tiling
9331as	MYNRL15	AGGACCCAGAGGGAGGCCTG	tiling
9335s	MYNRL15	GTCTGGGCTGGAGCCACCGC	tiling
9338as	MYNRL15	GCGGCGGAGGACCCAGAGGG	tiling
9341as	MYNRL15	CTCGCGGCGGAGGACCCAGA	tiling
9342as	MYNRL15	GCTCGCGGCGGAGGACCCAG	tiling
9346s	MYNRL15	AGCCACCGCAGGCCTCCCTC	tiling
9347s	MYNRL15	GCCACCGCAGGCCTCCCTCT	tiling
9351as	MYNRL15	CTGCAGGGAGCTCGCGGCGG	tiling
9354as	MYNRL15	GACCTGCAGGGAGCTCGCGG	tiling
9357as	MYNRL15	AGAGACCTGCAGGGAGCTCG	tiling
9366as	MYNRL15	TGTCCCCGCAGAGACCTGCA	tiling
9367as	MYNRL15	CTGTCCCCGCAGAGACCTGC	tiling
9372s	MYNRL15	CTCCGCCGCGAGCTCCCTGC	tiling
9381s	MYNRL15	GAGCTCCCTGCAGGTCTCTG	tiling
9382s	MYNRL15	AGCTCCCTGCAGGTCTCTGC	tiling
9383s	MYNRL15	GCTCCCTGCAGGTCTCTGCG	tiling
9393s	MYNRL15	GGTCTCTGCGGGGACAGCTT	tiling
9400as	MYNRL15	CGCAGGTGCAGGCAAGCTCC	tiling
9401as	MYNRL15	TCGCAGGTGCAGGCAAGCTC	tiling
9402s	MYNRL15	GGGGACAGCTTAGGTGCGCC	tiling
9411as	MYNRL15	TGGCTCTGGATCGCAGGTGC	tiling
9417as	MYNRL15	GGCGCTTGGCTCTGGATCGC	tiling
9425as	MYNRL15	AGGGGCGGGGCGCTTGGCTC	tiling
9431as	MYNRL15	CCGGGCAGGGGCGGGGCGCT	tiling
9438as	MYNRL15	AGCGCGCCCGGGCAGGGGCG	tiling
9439as	MYNRL15	GAGCGCGCCCGGGCAGGGGC	tiling
9440as	MYNRL15	GGAGCGCGCCCGGGCAGGGG	tiling
9443as	MYNRL15	GAGGGAGCGCGCCCGGGCAG	tiling
9444as	MYNRL15	GGAGGGAGCGCGCCCGGGCA	tiling
9445as	MYNRL15	AGGAGGGAGCGCGCCCGGGC	tiling
9449as	MYNRL15	GCTAAGGAGGGAGCGCGCCC	tiling
9450as	MYNRL15	GGCTAAGGAGGGAGCGCGCC	tiling
9451s	MYNRL15	CCAAGCGCCCCGCCCCTGCC	tiling
9452s	MYNRL15	CAAGCGCCCCGCCCCTGCCC	tiling
9461as	MYNRL15	GAGAGGGGCAGGGCTAAGGA	tiling
9462as	MYNRL15	AGAGAGGGGCAGGGCTAAGG	tiling
9465as	MYNRL15	GTCAGAGAGGGGCAGGGCTA	tiling
9471as	MYNRL15	GGTGGGGTCAGAGAGGGGCA	tiling
9472as	MYNRL15	AGGTGGGGTCAGAGAGGGGC	tiling
9476as	MYNRL15	TCGGAGGTGGGGTCAGAGAG	tiling
9477as	MYNRL15	GTCGGAGGTGGGGTCAGAGA	tiling
9478as	MYNRL15	CGTCGGAGGTGGGGTCAGAG	tiling
9487as	MYNRL15	CCACTCTTGCGTCGGAGGTG	tiling
9488as	MYNRL15	CCCACTCTTGCGTCGGAGGT	tiling
9489as	MYNRL15	CCCCACTCTTGCGTCGGAGG	tiling
9492as	MYNRL15	CCGCCCCACTCTTGCGTCGG	tiling
9495as	MYNRL15	GCCCCGCCCCACTCTTGCGT	tiling
9507s	MYNRL15	CCCCACCTCCGACGCAAGAG	tiling
9508s	MYNRL15	CCCACCTCCGACGCAAGAGT	tiling
9509s	MYNRL15	CCACCTCCGACGCAAGAGTG	tiling
9512s	MYNRL15	CCTCCGACGCAAGAGTGGGG	tiling
9513s	MYNRL15	CTCCGACGCAAGAGTGGGGC	tiling
9514s	MYNRL15	TCCGACGCAAGAGTGGGGCG	tiling
9523as	MYNRL15	GTCTGGGTTCGGGACGCCAC	tiling
9524s	MYNRL15	GAGTGGGGCGGGGCAGCTGC	tiling
9527s	MYNRL15	TGGGGCGGGGCAGCTGCCGG	tiling
9533as	MYNRL15	GGCGGGGCGAGTCTGGGTTC	tiling
9534as	MYNRL15	GGGCGGGGCGAGTCTGGGTT	tiling
9539as	MYNRL15	CTCTGGGGCGGGGCGAGTCT	tiling
9540as	MYNRL15	TCTCTGGGGCGGGGCGAGTC	tiling
9549as	MYNRL15	CAGGCGCAGTCTCTGGGGCG	tiling
9550as	MYNRL15	GCAGGCGCAGTCTCTGGGGC	tiling
9551as	MYNRL15	CGCAGGCGCAGTCTCTGGGG	tiling
9554as	MYNRL15	CCGCGCAGGCGCAGTCTCTG	tiling
9555as	MYNRL15	CCCGCGCAGGCGCAGTCTCT	tiling
9556as	MYNRL15	GCCCGCGCAGGCGCAGTCTC	tiling
9568as	MYNRL15	AGGTTGTCTCGTGCCCGCGC	tiling
9574s	MYNRL15	CCCCAGAGACTGCGCCTGCG	tiling
9575s	MYNRL15	CCCAGAGACTGCGCCTGCGC	tiling
9588as	MYNRL15	CACTCACAGTCATCGCGGAG	tiling
9593as	MYNRL15	TGGACCACTCACAGTCATCG	tiling
9609s	MYNRL15	CTCTCCGCGATGACTGTGAG	tiling
9613as	MYNRL15	GGCCGGGGCTCGGGGGTCCC	tiling
9615s	MYNRL15	GCGATGACTGTGAGTGGTCC	tiling
9616s	MYNRL15	CGATGACTGTGAGTGGTCCA	tiling
9620as	MYNRL15	GGTGGCCGGCCGGGGCTCGG	tiling
9621as	MYNRL15	GGGTGGCCGGCCGGGGCTCG	tiling
9622as	MYNRL15	GGGGTGGCCGGCCGGGGCTC	tiling
9623as	MYNRL15	GGGGGTGGCCGGCCGGGGCT	tiling
9628as	MYNRL15	ACCCCGGGGGTGGCCGGCCG	tiling
9629as	MYNRL15	CACCCCGGGGGTGGCCGGCC	tiling
9630as	MYNRL15	GCACCCCGGGGGTGGCCGGC	tiling
9631s	MYNRL15	GTCCAGGGACCCCCGAGCCC	tiling
9634as	MYNRL15	GTACGCACCCCGGGGGTGGC	tiling
9635s	MYNRL15	AGGGACCCCCGAGCCCCGGC	tiling
9638as	MYNRL15	TTGGGTACGCACCCCGGGGG	tiling
9641as	MYNRL15	GGGTTGGGTACGCACCCCGG	tiling
9642as	MYNRL15	GGGGTTGGGTACGCACCCCG	tiling
9643as	MYNRL15	GGGGGTTGGGTACGCACCCC	tiling
9644as	MYNRL15	CGGGGGTTGGGTACGCACCC	tiling
9645s	MYNRL15	GAGCCCCGGCCGGCCACCCC	tiling
9646s	MYNRL15	AGCCCCGGCCGGCCACCCCC	tiling
9647s	MYNRL15	GCCCCGGCCGGCCACCCCCG	tiling
9656as	MYNRL15	GGGGTGATGGCGCGGGGGTT	tiling
9657as	MYNRL15	AGGGGTGATGGCGCGGGGGT	tiling
9661as	MYNRL15	GCGAAGGGGTGATGGCGCGG	tiling
9662as	MYNRL15	TGCGAAGGGGTGATGGCGCG	tiling
9663as	MYNRL15	GTGCGAAGGGGTGATGGCGC	tiling
9664as	MYNRL15	GGTGCGAAGGGGTGATGGCG	tiling
9669as	MYNRL15	GGGCGGGTGCGAAGGGGTGA	tiling
9675as	MYNRL15	TGGTCAGGGCGGGTGCGAAG	tiling
9676as	MYNRL15	ATGGTCAGGGCGGGTGCGAA	tiling
9677as	MYNRL15	GATGGTCAGGGCGGGTGCGA	tiling
9685as	MYNRL15	AGGCCAGGGATGGTCAGGGC	tiling
9686as	MYNRL15	GAGGCCAGGGATGGTCAGGG	tiling
9689as	MYNRL15	AAGGAGGCCAGGGATGGTCA	tiling
9690as	MYNRL15	GAAGGAGGCCAGGGATGGTC	tiling
9695as	MYNRL15	GGGGAGAAGGAGGCCAGGGA	tiling
9699as	MYNRL15	GGATGGGGAGAAGGAGGCCA	tiling
9700as	MYNRL15	TGGATGGGGAGAAGGAGGCC	tiling
9702s	MYNRL15	GCACCCGCCCTGACCATCCC	tiling
9705as	MYNRL15	CCTCATGGATGGGGAGAAGG	tiling
9708as	MYNRL15	GAGCCTCATGGATGGGGAGA	tiling
9714as	MYNRL15	CGGGGCGAGCCTCATGGATG	tiling
9715as	MYNRL15	TCGGGGCGAGCCTCATGGAT	tiling
9716as	MYNRL15	ATCGGGGCGAGCCTCATGGA	tiling
9720as	MYNRL15	AGGGATCGGGGCGAGCCTCA	tiling
9725s	MYNRL15	CCTCCTTCTCCCCATCCATG	tiling
9732as	MYNRL15	GGAGAGGAGAGGAGGGATCG	tiling
9733as	MYNRL15	GGGAGAGGAGAGGAGGGATC	tiling
9734as	MYNRL15	GGGGAGAGGAGAGGAGGGAT	tiling
9739as	MYNRL15	GCTAAGGGGAGAGGAGAGGA	tiling
9740as	MYNRL15	AGCTAAGGGGAGAGGAGAGG	tiling
9743as	MYNRL15	GGGAGCTAAGGGGAGAGGAG	tiling
9748as	MYNRL15	AGCCCGGGAGCTAAGGGGAG	tiling
9753as	MYNRL15	GGCAGAGCCCGGGAGCTAAG	tiling
9754as	MYNRL15	GGGCAGAGCCCGGGAGCTAA	tiling
9755as	MYNRL15	GGGGCAGAGCCCGGGAGCTA	tiling
9763as	MYNRL15	GGGGGTTCGGGGCAGAGCCC	tiling
9764as	MYNRL15	AGGGGGTTCGGGGCAGAGCC	tiling
9765s	MYNRL15	TCTCCTCTCCCCTTAGCTCC	tiling
9766s	MYNRL15	CTCCTCTCCCCTTAGCTCCC	tiling
9774as	MYNRL15	GAAACGTCGGAGGGGGTTCG	tiling
9775as	MYNRL15	GGAAACGTCGGAGGGGGTTC	tiling
9776as	MYNRL15	CGGAAACGTCGGAGGGGGTT	tiling
9781as	MYNRL15	GGGGGCGGAAACGTCGGAGG	tiling
9782as	MYNRL15	AGGGGGCGGAAACGTCGGAG	tiling
9783as	MYNRL15	AAGGGGGCGGAAACGTCGGA	tiling
9784as	MYNRL15	AAAGGGGGCGGAAACGTCGG	tiling
9787as	MYNRL15	GAGAAAGGGGGCGGAAACGT	tiling
9796as	MYNRL15	GCCTGTAGAGAGAAAGGGGG	tiling
9799as	MYNRL15	CTGGCCTGTAGAGAGAAAGG	tiling
9800as	MYNRL15	GCTGGCCTGTAGAGAGAAAG	tiling
9801as	MYNRL15	AGCTGGCCTGTAGAGAGAAA	tiling
9802as	MYNRL15	GAGCTGGCCTGTAGAGAGAA	tiling
9815s	MYNRL15	TCCGCCCCCTTTCTCTCTAC	tiling
9818as	MYNRL15	CCGCAGCTGCTCCACTGAGC	tiling
9827s	MYNRL15	CTCTCTACAGGCCAGCTCAG	tiling
9838s	MYNRL15	CCAGCTCAGTGGAGCAGCTG	tiling
9842s	MYNRL15	CTCAGTGGAGCAGCTGCGGA	tiling
9845s	MYNRL15	AGTGGAGCAGCTGCGGAAGG	tiling
9846s	MYNRL15	GTGGAGCAGCTGCGGAAGGA	tiling
9867s	MYNRL15	GGCAATGAGCTGTTCAAATG	tiling
9876s	MYNRL15	CTGTTCAAATGTGGAGACTA	tiling
9877s	MYNRL15	TGTTCAAATGTGGAGACTAC	tiling
9878s	MYNRL15	GTTCAAATGTGGAGACTACG	tiling
9879s	MYNRL15	TTCAAATGTGGAGACTACGG	tiling
9884as	MYNRL15	GGCCTGAGTGTAGGCCGCCA	tiling
9885as	MYNRL15	GGGCCTGAGTGTAGGCCGCC	tiling
9887s	MYNRL15	TGGAGACTACGGGGGCGCCC	tiling
9890s	MYNRL15	AGACTACGGGGGCGCCCTGG	tiling
9893as	MYNRL15	CAGACCCAGGGCCTGAGTGT	tiling
9902s	MYNRL15	CGCCCTGGCGGCCTACACTC	tiling
9905as	MYNRL15	GGGCGTCGCGTCCAGACCCA	tiling
9906as	MYNRL15	GGGGCGTCGCGTCCAGACCC	tiling
9908s	MYNRL15	GGCGGCCTACACTCAGGCCC	tiling
9909s	MYNRL15	GCGGCCTACACTCAGGCCCT	tiling
9914s	MYNRL15	CTACACTCAGGCCCTGGGTC	tiling
9925as	MYNRL15	TGCAGAACGGCCTGGTCCTG	tiling
9926as	MYNRL15	GTGCAGAACGGCCTGGTCCT	tiling
9927as	MYNRL15	GGTGCAGAACGGCCTGGTCC	tiling
9929s	MYNRL15	GGGTCTGGACGCGACGCCCC	tiling
9933as	MYNRL15	GGTTCCGGTGCAGAACGGCC	tiling
9935s	MYNRL15	GGACGCGACGCCCCAGGACC	tiling
9938as	MYNRL15	GGCCCGGTTCCGGTGCAGAA	tiling
9948as	MYNRL15	GGTGGCAGGCGGCCCGGTTC	tiling
9949s	MYNRL15	AGGACCAGGCCGTTCTGCAC	tiling
9954as	MYNRL15	GCTTGAGGTGGCAGGCGGCC	tiling
9955s	MYNRL15	AGGCCGTTCTGCACCGGAAC	tiling
9956s	MYNRL15	GGCCGTTCTGCACCGGAACC	tiling
9959as	MYNRL15	CACCAGCTTGAGGTGGCAGG	tiling
9962as	MYNRL15	CCTCACCAGCTTGAGGTGGC	tiling
9966as	MYNRL15	GCTCCCTCACCAGCTTGAGG	tiling
9969as	MYNRL15	CAGGCTCCCTCACCAGCTTG	tiling
9977s	MYNRL15	GGCCGCCTGCCACCTCAAGC	tiling
9982s	MYNRL15	CCTGCCACCTCAAGCTGGTG	tiling
9983s	MYNRL15	CTGCCACCTCAAGCTGGTGA	tiling
9988as	MYNRL15	CGGGCGAGGGGAAGAGCGCC	tiling
9990s	MYNRL15	CTCAAGCTGGTGAGGGAGCC	tiling
10000as	MYNRL15	CCGGGGCCCGGGCGGGCGAG	tiling
10001as	MYNRL15	ACCGGGGCCCGGGCGGGCGA	tiling
10002as	MYNRL15	AACCGGGGCCCGGGCGGGCG	tiling
10007as	MYNRL15	GGGCGAACCGGGGCCCGGGC	tiling
10008as	MYNRL15	TGGGCGAACCGGGGCCCGGG	tiling
10011as	MYNRL15	AGATGGGCGAACCGGGGCCC	tiling
10012as	MYNRL15	TAGATGGGCGAACCGGGGCC	tiling
10013s	MYNRL15	CGCTCTTCCCCTCGCCCGCC	tiling
10014s	MYNRL15	GCTCTTCCCCTCGCCCGCCC	tiling
10017as	MYNRL15	CAGCTTAGATGGGCGAACCG	tiling
10018as	MYNRL15	TCAGCTTAGATGGGCGAACC	tiling
10019as	MYNRL15	ATCAGCTTAGATGGGCGAAC	tiling
10020s	MYNRL15	CCCCTCGCCCGCCCGGGCCC	tiling
10027as	MYNRL15	GCCCAAGCATCAGCTTAGAT	tiling
10028as	MYNRL15	GGCCCAAGCATCAGCTTAGA	tiling
10045s	MYNRL15	CGCCCATCTAAGCTGATGCT	tiling
10046s	MYNRL15	GCCCATCTAAGCTGATGCTT	tiling
10049as	MYNRL15	GGAGCGTGAATGTCCAGCTG	tiling
10050as	MYNRL15	GGGAGCGTGAATGTCCAGCT	tiling
10051as	MYNRL15	TGGGAGCGTGAATGTCCAGC	tiling
10056s	MYNRL15	GCTGATGCTTGGGCCCCAGC	tiling
10070as	MYNRL15	CTGGCAAGCGGGGATGGCCT	tiling
10071as	MYNRL15	TCTGGCAAGCGGGGATGGCC	tiling
10073s	MYNRL15	AGCTGGACATTCACGCTCCC	tiling
10076as	MYNRL15	AAACATCTGGCAAGCGGGGA	tiling
10080as	MYNRL15	CAAAAAACATCTGGCAAGCG	tiling
10081as	MYNRL15	GCAAAAAACATCTGGCAAGC	tiling
10082as	MYNRL15	TGCAAAAAACATCTGGCAAG	tiling
10089as	MYNRL15	CCTGAGGTGCAAAAAACATC	tiling
10105as	MYNRL15	CCCGATCCCCCACCACCCTG	tiling
10119s	MYNRL15	TTTGCACCTCAGGGTGGTGG	tiling
10124s	MYNRL15	ACCTCAGGGTGGTGGGGGAT	tiling
10125s	MYNRL15	CCTCAGGGTGGTGGGGGATC	tiling
10131as	MYNRL15	AGGGGTACTCTCGCTCTCCA	tiling
10134s	MYNRL15	GGTGGGGGATCGGGTGACCT	tiling
10149as	MYNRL15	GGGCACTAACCAGGCAGCAG	tiling
10150as	MYNRL15	GGGGCACTAACCAGGCAGCA	tiling
10151as	MYNRL15	CGGGGCACTAACCAGGCAGC	tiling
10158as	MYNRL15	TCCCTCTCGGGGCACTAACC	tiling
10160s	MYNRL15	GCGAGAGTACCCCTGCTGCC	tiling
10169as	MYNRL15	GAATGGTCATCTCCCTCTCG	tiling
10170as	MYNRL15	GGAATGGTCATCTCCCTCTC	tiling
10171as	MYNRL15	AGGAATGGTCATCTCCCTCT	tiling
10176s	MYNRL15	TGCCTGGTTAGTGCCCCGAG	tiling
10177s	MYNRL15	GCCTGGTTAGTGCCCCGAGA	tiling
10186as	MYNRL15	AAGACAGGAGCCTGAAGGAA	tiling
10191as	MYNRL15	AGAGAAAGACAGGAGCCTGA	tiling
10196s	MYNRL15	AGGGAGATGACCATTCCTTC	tiling
10201as	MYNRL15	TCTTCCTGTAAGAGAAAGAC	tiling
10217s	MYNRL15	GGCTCCTGTCTTTCTCTTAC	tiling
10244s	MYNRL15	TTACGACAAAGCAGAAACAG	tiling
10250as	MYNRL15	GCCCACCATTCCCCTACCTT	tiling
10254s	MYNRL15	GCAGAAACAGAGGCATCCAA	tiling
10258s	MYNRL15	AAACAGAGGCATCCAAAGGT	tiling
10259s	MYNRL15	AACAGAGGCATCCAAAGGTA	tiling
10260s	MYNRL15	ACAGAGGCATCCAAAGGTAG	tiling
10265s	MYNRL15	GGCATCCAAAGGTAGGGGAA	tiling
10268s	MYNRL15	ATCCAAAGGTAGGGGAATGG	tiling
10269s	MYNRL15	TCCAAAGGTAGGGGAATGGT	tiling
10272as	MYNRL15	AGCCCTACAGCTCCACACCA	tiling
10273as	MYNRL15	AAGCCCTACAGCTCCACACC	tiling
10275s	MYNRL15	GGTAGGGGAATGGTGGGCCC	tiling
10280s	MYNRL15	GGGAATGGTGGGCCCTGGTG	tiling
10289s	MYNRL15	GGGCCCTGGTGTGGAGCTGT	tiling
10290s	MYNRL15	GGCCCTGGTGTGGAGCTGTA	tiling
10299s	MYNRL15	GTGGAGCTGTAGGGCTTCTG	tiling
10302s	MYNRL15	GAGCTGTAGGGCTTCTGTGG	tiling
10303s	MYNRL15	AGCTGTAGGGCTTCTGTGGT	tiling
10308s	MYNRL15	TAGGGCTTCTGTGGTGGGCA	tiling
10315s	MYNRL15	TCTGTGGTGGGCAAGGACTC	tiling
10316s	MYNRL15	CTGTGGTGGGCAAGGACTCT	tiling
10320as	MYNRL15	AGGAGAATGTGACGGTGCAG	tiling
10328as	MYNRL15	GCCAAAGGAGGAGAATGTGA	tiling
10340as	MYNRL15	TGTGTCTCTGGGGCCAAAGG	tiling
10343as	MYNRL15	AGATGTGTCTCTGGGGCCAA	tiling
10347s	MYNRL15	ACCGTCACATTCTCCTCCTT	tiling
10350as	MYNRL15	AGAAGGCAGATGTGTCTCTG	tiling
10351as	MYNRL15	AAGAAGGCAGATGTGTCTCT	tiling
10352as	MYNRL15	AAAGAAGGCAGATGTGTCTC	tiling
10367as	MYNRL15	GAGGCAGTGGGAAAGAAAGA	tiling
10379as	MYNRL15	AAGGAAAGGCCCGAGGCAGT	tiling
10380as	MYNRL15	AAAGGAAAGGCCCGAGGCAG	tiling
10386as	MYNRL15	TGCAGAAAAGGAAAGGCCCG	tiling
10389s	MYNRL15	TTCTTTCTTTCCCACTGCCT	tiling
10390s	MYNRL15	TCTTTCTTTCCCACTGCCTC	tiling
10393as	MYNRL15	GGGTAGCTGCAGAAAAGGAA	tiling
10398as	MYNRL15	GGTGAGGGTAGCTGCAGAAA	tiling
10413as	MYNRL15	TTCAGCCTCAGAAAAGGTGA	tiling
10414as	MYNRL15	CTTCAGCCTCAGAAAAGGTG	tiling
10419as	MYNRL15	CGGTGCTTCAGCCTCAGAAA	tiling
10439as	MYNRL15	GGGGGGACGAATGTGGGGCT	tiling
10444as	MYNRL15	AGGTGGGGGGGACGAATGTG	tiling
10445as	MYNRL15	AAGGTGGGGGGGACGAATGT	tiling
10446as	MYNRL15	GAAGGTGGGGGGGACGAATG	tiling
10456as	MYNRL15	AAGGCCAGAAGAAGGTGGGG	tiling
10457as	MYNRL15	AAAGGCCAGAAGAAGGTGGG	tiling
10458as	MYNRL15	GAAAGGCCAGAAGAAGGTGG	tiling
10459as	MYNRL15	GGAAAGGCCAGAAGAAGGTG	tiling
10460as	MYNRL15	AGGAAAGGCCAGAAGAAGGT	tiling
10461as	MYNRL15	GAGGAAAGGCCAGAAGAAGG	tiling
10464as	MYNRL15	CTCGAGGAAAGGCCAGAAGA	tiling
10472s	MYNRL15	TCGTCCCCCCCACCTTCTTC	tiling
10475as	MYNRL15	TAGGGAAAGATCTCGAGGAA	tiling
10480as	MYNRL15	AGCAGTAGGGAAAGATCTCG	tiling
10493as	MYNRL15	GTCTCCAGGCAAGAGCAGTA	tiling
10494as	MYNRL15	TGTCTCCAGGCAAGAGCAGT	tiling
10507as	MYNRL15	CCCATGAGGCCACTGTCTCC	tiling
10509s	MYNRL15	CTTTCCCTACTGCTCTTGCC	tiling
10518s	MYNRL15	CTGCTCTTGCCTGGAGACAG	tiling
10521as	MYNRL15	GAGCGCTGTCAGCACCCATG	tiling
10526s	MYNRL15	GCCTGGAGACAGTGGCCTCA	tiling
10527s	MYNRL15	CCTGGAGACAGTGGCCTCAT	tiling
10543as	MYNRL15	TTCAATGGCTGAGCACAAAC	tiling
10567s	MYNRL15	TTTGTGCTCAGCCATTGAAA	tiling
10571s	MYNRL15	TGCTCAGCCATTGAAAAGGA	tiling
10574s	MYNRL15	TCAGCCATTGAAAAGGATGG	tiling
10575s	MYNRL15	CAGCCATTGAAAAGGATGGT	tiling
10576s	MYNRL15	AGCCATTGAAAAGGATGGTG	tiling
10595as	MYNRL15	TCTCTAGGGCTTGGCTCCGC	tiling
10596s	MYNRL15	GGGATGTCAAAGCACTCTAC	tiling
10599s	MYNRL15	ATGTCAAAGCACTCTACCGG	tiling
10604as	MYNRL15	GGCCCAGCTTCTCTAGGGCT	tiling
10609as	MYNRL15	CAGGCGGCCCAGCTTCTCTA	tiling
10610as	MYNRL15	CCAGGCGGCCCAGCTTCTCT	tiling
10621s	MYNRL15	GAGCCAAGCCCTAGAGAAGC	tiling
10622s	MYNRL15	AGCCAAGCCCTAGAGAAGCT	tiling
10625as	MYNRL15	CAAGGACAGCCTGGTCCAGG	tiling
10628as	MYNRL15	GGTCAAGGACAGCCTGGTCC	tiling
10630s	MYNRL15	CCTAGAGAAGCTGGGCCGCC	tiling
10634as	MYNRL15	TCTGCAGGTCAAGGACAGCC	tiling
10636s	MYNRL15	GAAGCTGGGCCGCCTGGACC	tiling
10643as	MYNRL15	TCACACATCTCTGCAGGTCA	tiling
10649as	MYNRL15	CCAAGCTCACACATCTCTGC	tiling
10669s	MYNRL15	CCTGCAGAGATGTGTGAGCT	tiling
10674as	MYNRL15	TCCTGGAAAACTTTGTTCTT	tiling
10675as	MYNRL15	CTCCTGGAAAACTTTGTTCT	tiling
10691as	MYNRL15	CGATGTTCCGCAAGGCCTCC	tiling
10699as	MYNRL15	CTGGCCCCCGATGTTCCGCA	tiling
10712s	MYNRL15	CAGGAGGCCTTGCGGAACAT	tiling
10713s	MYNRL15	AGGAGGCCTTGCGGAACATC	tiling
10714s	MYNRL15	GGAGGCCTTGCGGAACATCG	tiling
10715s	MYNRL15	GAGGCCTTGCGGAACATCGG	tiling
10718as	MYNRL15	CACATACCTTCTCCTGAATC	tiling
10726s	MYNRL15	GAACATCGGGGGCCAGATTC	tiling
10732s	MYNRL15	CGGGGGCCAGATTCAGGAGA	tiling
10746as	MYNRL15	GTCAATGCTTCCACCTCTCT	tiling
10747as	MYNRL15	AGTCAATGCTTCCACCTCTC	tiling
10753s	MYNRL15	GGTATGTGAGTGACCCAGAG	tiling
10756s	MYNRL15	ATGTGAGTGACCCAGAGAGG	tiling
10769s	MYNRL15	AGAGAGGTGGAAGCATTGAC	tiling
10772s	MYNRL15	GAGGTGGAAGCATTGACTGG	tiling
10778s	MYNRL15	GAAGCATTGACTGGTGGTGA	tiling
10779s	MYNRL15	AAGCATTGACTGGTGGTGAA	tiling
10780s	MYNRL15	AGCATTGACTGGTGGTGAAG	tiling
10785s	MYNRL15	TGACTGGTGGTGAAGGGGTC	tiling
10786s	MYNRL15	GACTGGTGGTGAAGGGGTCT	tiling
10789as	MYNRL15	GAGAACTGTGTCTACACCCC	tiling
10791s	MYNRL15	GTGGTGAAGGGGTCTGGGCC	tiling
10792s	MYNRL15	TGGTGAAGGGGTCTGGGCCA	tiling
10793s	MYNRL15	GGTGAAGGGGTCTGGGCCAG	tiling
10811as	MYNRL15	CTTGCCACCGGGATCTCGTC	tiling
10822as	MYNRL15	GGCAAGGTTCACTTGCCACC	tiling
10823as	MYNRL15	AGGCAAGGTTCACTTGCCAC	tiling
10824s	MYNRL15	CAGTTCTCCAGACGAGATCC	tiling
10827s	MYNRL15	TTCTCCAGACGAGATCCCGG	tiling
10847s	MYNRL15	TGGCAAGTGAACCTTGCCTG	tiling
10852s	MYNRL15	AGTGAACCTTGCCTGTGGCC	tiling
10853s	MYNRL15	GTGAACCTTGCCTGTGGCCA	tiling
10893s	MYNRL15	ACAGCACATTACTGTTGATT	tiling
10896s	MYNRL15	GCACATTACTGTTGATTTGG	tiling
10905s	MYNRL15	TGTTGATTTGGAGGTCTGTC	tiling
10962s	MYNRL15	GAGAGAGGCAGACACATCAG	tiling
10967s	MYNRL15	AGGCAGACACATCAGTGGTG	tiling
10971s	MYNRL15	AGACACATCAGTGGTGAGGC	tiling
10972s	MYNRL15	GACACATCAGTGGTGAGGCT	tiling
10973s	MYNRL15	ACACATCAGTGGTGAGGCTG	tiling
10974s	MYNRL15	CACATCAGTGGTGAGGCTGG	tiling
10977as	MYNRL15	AGCAGTCATCAGAGAGCCCT	tiling
10980s	MYNRL15	AGTGGTGAGGCTGGGGGCCA	tiling
10981s	MYNRL15	GTGGTGAGGCTGGGGGCCAA	tiling
10999s	MYNRL15	AAGGGCTCTCTGATGACTGC	tiling
11002s	MYNRL15	GGCTCTCTGATGACTGCTGG	tiling
11003s	MYNRL15	GCTCTCTGATGACTGCTGGA	tiling
11004s	MYNRL15	CTCTCTGATGACTGCTGGAG	tiling
11014s	MYNRL15	ACTGCTGGAGGGGTATAAAT	tiling
11080as	MYNRL15	ACAGCAAGAAGTAAACATAT	tiling
11081as	MYNRL15	AACAGCAAGAAGTAAACATA	tiling
11117as	MYNRL15	TCTACTTGTGCACGTGGACA	tiling
11123as	MYNRL15	CACATGTCTACTTGTGCACG	tiling
11192as	MYNRL15	TCCTCTATGGCTGGGCATTC	tiling
11200as	MYNRL15	TCAGCCATTCCTCTATGGCT	tiling
11201as	MYNRL15	TTCAGCCATTCCTCTATGGC	tiling
11205as	MYNRL15	TTTATTCAGCCATTCCTCTA	tiling
11211s	MYNRL15	GCCTGAATGCCCAGCCATAG	tiling
11216s	MYNRL15	AATGCCCAGCCATAGAGGAA	tiling
11228s	MYNRL15	TAGAGGAATGGCTGAATAAA	tiling
11229s	MYNRL15	AGAGGAATGGCTGAATAAAT	tiling
11238as	MYNRL15	CTATATAAGAGTCTGTAGTA	tiling
11272s	MYNRL15	CTTATATAGTTACTGAGAAT	tiling
11295s	MYNRL15	TAGATACACACATATTGAAA	tiling
11296s	MYNRL15	AGATACACACATATTGAAAT	tiling
11305s	MYNRL15	CATATTGAAATGGGAAGCTC	tiling
11306s	MYNRL15	ATATTGAAATGGGAAGCTCT	tiling
11336s	MYNRL15	TTGAATGAACAAAGCAAAAT	tiling
11340s	MYNRL15	ATGAACAAAGCAAAATAGGC	tiling
11341s	MYNRL15	TGAACAAAGCAAAATAGGCA	tiling
11346s	MYNRL15	AAAGCAAAATAGGCAGGGCA	tiling
11349s	MYNRL15	GCAAAATAGGCAGGGCATGG	tiling
11404s	MYNRL15	CAAGATGGGATGATCACTGG	tiling
11475s	MYNRL15	CCAAAACCTAAAAAGTTAGC	tiling
11476s	MYNRL15	CAAAACCTAAAAAGTTAGCT	tiling
11533as	MYNRL15	CTGCAAAATCCAGGGCTCAA	tiling
11541as	MYNRL15	CACTGTAACTGCAAAATCCA	tiling
11542as	MYNRL15	TCACTGTAACTGCAAAATCC	tiling
11751s	MYNRL15	ACTTGGGTATGTAAATACAA	tiling
12134as	MYNRL15	AAGAGGTTGTACTCCAGCAT	tiling
12135as	MYNRL15	GAAGAGGTTGTACTCCAGCA	tiling
12162s	MYNRL15	GGAGTACAACCTCTTCCTCC	tiling
12192as	MYNRL15	TGCATTTGTCCCAGCTACTT	tiling
12193as	MYNRL15	ATGCATTTGTCCCAGCTACT	tiling
12283s	MYNRL15	TACTGTGTTGCCCAGGTGGC	tiling
12295as	MYNRL15	TGAGTAGATCCCTTGAGCCT	tiling
12355as	MYNRL15	GCATATTTGGCCCAGTGCCA	tiling
12368as	MYNRL15	AAGAAACAAAAATGCATATT	tiling
12439s	MYNRL15	TATACATCAAAATGATAACA	tiling
12445as	MYNRL15	AATCCCATTCCTTTCCCCAG	tiling
12446as	MYNRL15	CAATCCCATTCCTTTCCCCA	tiling
12447as	MYNRL15	TCAATCCCATTCCTTTCCCC	tiling
12449s	MYNRL15	AATGATAACACGGTGACCCC	tiling
12450s	MYNRL15	ATGATAACACGGTGACCCCT	tiling
12451s	MYNRL15	TGATAACACGGTGACCCCTG	tiling
12456s	MYNRL15	ACACGGTGACCCCTGGGGAA	tiling
12461s	MYNRL15	GTGACCCCTGGGGAAAGGAA	tiling
12462s	MYNRL15	TGACCCCTGGGGAAAGGAAT	tiling
12471s	MYNRL15	GGGAAAGGAATGGGATTGAG	tiling
12472s	MYNRL15	GGAAAGGAATGGGATTGAGA	tiling
12479as	MYNRL15	ACAGGTGATGCAGTCTCCTT	tiling
12483s	MYNRL15	GGATTGAGAGGGCTTTCCAA	tiling
12497as	MYNRL15	TTTATTAAAAAAATATGAAC	tiling
12574as	MYNRL15	AGCTTGGTTGTAGCTCATAA	tiling
12590as	MYNRL15	TTATCTGGCGAATTTGAGCT	tiling
12637s	MYNRL15	ACGTTAAAATGCTGACACAG	tiling
12655s	MYNRL15	AGTGGAAGCAGATAACATGA	tiling
12664as	MYNRL15	CAGGCTTCAACATTTCAGTG	tiling
12683as	MYNRL15	GGAAACCTATTTGCTTTCCC	tiling
12685s	MYNRL15	CTCACTGAAATGTTGAAGCC	tiling
12686s	MYNRL15	TCACTGAAATGTTGAAGCCT	tiling
12698s	MYNRL15	TGAAGCCTGGGAAAGCAAAT	tiling
12704as	MYNRL15	ATCAGAGTTGGCATTGAGAG	tiling
12716as	MYNRL15	CAGCCACTGCCAATCAGAGT	tiling
12727s	MYNRL15	CTCTCAATGCCAACTCTGAT	tiling
12733s	MYNRL15	ATGCCAACTCTGATTGGCAG	tiling
12739as	MYNRL15	TCTTCTCAACATAGGACTCT	tiling
12740as	MYNRL15	TTCTTCTCAACATAGGACTC	tiling
12747as	MYNRL15	TTCCTAATTCTTCTCAACAT	tiling
12765s	MYNRL15	GTCCTATGTTGAGAAGAATT	tiling
12778as	MYNRL15	CACGTTCCCCTGCTTGGCTC	tiling
12784as	MYNRL15	TCATGGCACGTTCCCCTGCT	tiling
12790s	MYNRL15	GCAGATTGCCTGAGCCAAGC	tiling
12791s	MYNRL15	CAGATTGCCTGAGCCAAGCA	tiling
12792s	MYNRL15	AGATTGCCTGAGCCAAGCAG	tiling
12801as	MYNRL15	CAGCCATGACTAACCAGTCA	tiling
12808s	MYNRL15	GCAGGGGAACGTGCCATGAC	tiling
12818s	MYNRL15	GTGCCATGACTGGTTAGTCA	tiling
12824as	MYNRL15	GCCTTCCTCTCTTGCATCCA	tiling
12827s	MYNRL15	CTGGTTAGTCATGGCTGCCA	tiling
12839s	MYNRL15	GGCTGCCATGGATGCAAGAG	tiling
12843s	MYNRL15	GCCATGGATGCAAGAGAGGA	tiling
12846s	MYNRL15	ATGGATGCAAGAGAGGAAGG	tiling
12847s	MYNRL15	TGGATGCAAGAGAGGAAGGC	tiling
12850s	MYNRL15	ATGCAAGAGAGGAAGGCGGG	tiling
12854as	MYNRL15	GGTGGCACAAGCCTAGCATG	tiling
12863s	MYNRL15	AGGCGGGTGGTCCACATGCT	tiling
12872as	MYNRL15	AGAGTCCTGGGCATAGATGG	tiling
12875as	MYNRL15	CCCAGAGTCCTGGGCATAGA	tiling
12884as	MYNRL15	CCCCCACCCCCCAGAGTCCT	tiling
12885as	MYNRL15	TCCCCCACCCCCCAGAGTCC	tiling
12887s	MYNRL15	TTGTGCCACCATCTATGCCC	tiling
12894s	MYNRL15	ACCATCTATGCCCAGGACTC	tiling
12895s	MYNRL15	CCATCTATGCCCAGGACTCT	tiling
12896s	MYNRL15	CATCTATGCCCAGGACTCTG	tiling
12897s	MYNRL15	ATCTATGCCCAGGACTCTGG	tiling
12898s	MYNRL15	TCTATGCCCAGGACTCTGGG	tiling
12901s	MYNRL15	ATGCCCAGGACTCTGGGGGG	tiling
12902s	MYNRL15	TGCCCAGGACTCTGGGGGGT	tiling
12903s	MYNRL15	GCCCAGGACTCTGGGGGGTG	tiling
12904s	MYNRL15	CCCAGGACTCTGGGGGGTGG	tiling
12910s	MYNRL15	ACTCTGGGGGGTGGGGGAGT	tiling
12913as	MYNRL15	TGAATGGGGAAGATCATCCT	tiling
12916s	MYNRL15	GGGGGTGGGGGAGTAGGCCT	tiling
12927as	MYNRL15	ATAAATAAATAATCTGAATG	tiling
13230as	MYNRL15	AAATCTGAAGCCAGGCACGG	tiling
13233as	MYNRL15	ATAAAATCTGAAGCCAGGCA	tiling
13238as	MYNRL15	AATAAATAAAATCTGAAGCC	tiling
13296s	MYNRL15	GAGTTTCACAGTTATTGCCC	tiling
13539as	MYNRL15	ATAATCTGAGCTGGGCGCAG	tiling
13587s	MYNRL15	AAACAGTGAAAAGAGAATTC	tiling
13596s	MYNRL15	AAAGAGAATTCTGGAGCTAA	tiling
13614as	MYNRL15	CAGGGAGCTGGCAGATCGTG	tiling
13626as	MYNRL15	TATACCTCCTGCCAGGGAGC	tiling
13632as	MYNRL15	AGCATTTATACCTCCTGCCA	tiling
13633as	MYNRL15	CAGCATTTATACCTCCTGCC	tiling
13635s	MYNRL15	CTCACGATCTGCCAGCTCCC	tiling
13639s	MYNRL15	CGATCTGCCAGCTCCCTGGC	tiling
13642s	MYNRL15	TCTGCCAGCTCCCTGGCAGG	tiling
13665as	MYNRL15	CAGCGTGAATGGGCTTCCCA	tiling
13668s	MYNRL15	AAATGCTGAGTTCAGTGCCA	tiling
13669s	MYNRL15	AATGCTGAGTTCAGTGCCAT	tiling
13675as	MYNRL15	TACATTGTGGCAGCGTGAAT	tiling
13676as	MYNRL15	CTACATTGTGGCAGCGTGAA	tiling
13688as	MYNRL15	CAGTGGTGCCATCTACATTG	tiling
13700s	MYNRL15	TCACGCTGCCACAATGTAGA	tiling
13705as	MYNRL15	ACGAGGCAACCCACTCCCAG	tiling
13709s	MYNRL15	CACAATGTAGATGGCACCAC	tiling
13710s	MYNRL15	ACAATGTAGATGGCACCACT	tiling
13715s	MYNRL15	GTAGATGGCACCACTGGGAG	tiling
13716s	MYNRL15	TAGATGGCACCACTGGGAGT	tiling
13722as	MYNRL15	GAGGTATCCTGTCAGCTACG	tiling
13735s	MYNRL15	TGGGTTGCCTCGTAGCTGAC	tiling
13755s	MYNRL15	AGGATACCTCCCCTCCGAAA	tiling
13762as	MYNRL15	AGCAGGGGCTGCGCCGATGC	tiling
13769s	MYNRL15	CCGAAAAGGCACTCCAGCAT	tiling
13777as	MYNRL15	ATTTCCTGCTTGGGCAGCAG	tiling
13778as	MYNRL15	TATTTCCTGCTTGGGCAGCA	tiling
13779as	MYNRL15	CTATTTCCTGCTTGGGCAGC	tiling
13786as	MYNRL15	TTCTGAGCTATTTCCTGCTT	tiling
13787as	MYNRL15	TTTCTGAGCTATTTCCTGCT	tiling
13793s	MYNRL15	GCAGCCCCTGCTGCCCAAGC	tiling
13817s	MYNRL15	AATAGCTCAGAAAGAAAAAC	tiling
13822s	MYNRL15	CTCAGAAAGAAAAACAGGTG	tiling
13823s	MYNRL15	TCAGAAAGAAAAACAGGTGC	tiling
13832s	MYNRL15	AAAACAGGTGCGGGAAATTT	tiling
13835s	MYNRL15	ACAGGTGCGGGAAATTTAGG	tiling
13843as	MYNRL15	TGGGCAGGAAGAGACTTGCC	tiling
13845s	MYNRL15	GAAATTTAGGAGGCACTGCC	tiling
13858as	MYNRL15	AGCACCTAGCTACCCTGGGC	tiling
13862as	MYNRL15	GGCTAGCACCTAGCTACCCT	tiling
13863as	MYNRL15	GGGCTAGCACCTAGCTACCC	tiling
13865s	MYNRL15	AGGCAAGTCTCTTCCTGCCC	tiling
13866s	MYNRL15	GGCAAGTCTCTTCCTGCCCA	tiling
13874s	MYNRL15	TCTTCCTGCCCAGGGTAGCT	tiling
13883as	MYNRL15	AGTAAAGATGTCCAGGCTCA	tiling
13884as	MYNRL15	CAGTAAAGATGTCCAGGCTC	tiling
13890as	MYNRL15	GAGGCACAGTAAAGATGTCC	tiling
13892s	MYNRL15	CTAGGTGCTAGCCCTGAGCC	tiling
13909as	MYNRL15	CTCCAGCTCCTCACTCTGGG	tiling
13912as	MYNRL15	TGTCTCCAGCTCCTCACTCT	tiling
13913as	MYNRL15	TTGTCTCCAGCTCCTCACTC	tiling
13921s	MYNRL15	TTACTGTGCCTCCCAGAGTG	tiling
13927s	MYNRL15	TGCCTCCCAGAGTGAGGAGC	tiling
13942s	MYNRL15	GGAGCTGGAGACAAATGAAT	tiling
13943s	MYNRL15	GAGCTGGAGACAAATGAATA	tiling
13959s	MYNRL15	AATAGGGAGTGTGATGTCTC	tiling
13962as	MYNRL15	ATGGAACAAATCACGGCTCT	tiling
13969as	MYNRL15	ACAAAGCATGGAACAAATCA	tiling
13981as	MYNRL15	CTAGACAAACCAACAAAGCA	tiling
13992s	MYNRL15	TGATTTGTTCCATGCTTTGT	tiling
14002s	MYNRL15	CATGCTTTGTTGGTTTGTCT	tiling
14017as	MYNRL15	TTCCACTTTGGCATCCGTCG	tiling
14023s	MYNRL15	GGTGCGATACATGTCCTCGA	tiling
14029as	MYNRL15	CTGAAACATCTGTTCCACTT	tiling
14035s	MYNRL15	GTCCTCGACGGATGCCAAAG	tiling
14059s	MYNRL15	ACAGATGTTTCAGATACTGT	tiling
14063as	MYNRL15	TCTCAGTGCCCTTCTCTTCT	tiling
14064as	MYNRL15	TTCTCAGTGCCCTTCTCTTC	tiling
14074s	MYNRL15	ACTGTTGGACCCAGAAGAGA	tiling
14075s	MYNRL15	CTGTTGGACCCAGAAGAGAA	tiling
14095s	MYNRL15	GGGCACTGAGAAAAAGCAAA	tiling
14101s	MYNRL15	TGAGAAAAAGCAAAAGGTAT	tiling
14104as	MYNRL15	TCACTCACTGACTCAGCCCA	tiling
14105as	MYNRL15	CTCACTCACTGACTCAGCCC	tiling
14107s	MYNRL15	AAAGCAAAAGGTATAGGCCC	tiling
14108s	MYNRL15	AAGCAAAAGGTATAGGCCCT	tiling
14130as	MYNRL15	TATGGATGGGTGGCTCTAGT	tiling
14131as	MYNRL15	CTATGGATGGGTGGCTCTAG	tiling
14140as	MYNRL15	TTCGGGGGCCTATGGATGGG	tiling
14143as	MYNRL15	GGCTTCGGGGGCCTATGGAT	tiling
14144as	MYNRL15	TGGCTTCGGGGGCCTATGGA	tiling
14148as	MYNRL15	GCAGTGGCTTCGGGGGCCTA	tiling
14152s	MYNRL15	CACTAGAGCCACCCATCCAT	tiling
14155as	MYNRL15	CAAGGCAGCAGTGGCTTCGG	tiling
14156as	MYNRL15	GCAAGGCAGCAGTGGCTTCG	tiling
14157as	MYNRL15	AGCAAGGCAGCAGTGGCTTC	tiling
14158as	MYNRL15	GAGCAAGGCAGCAGTGGCTT	tiling
14164as	MYNRL15	GCGGCAGAGCAAGGCAGCAG	tiling
14173as	MYNRL15	ATTGGAGGAGCGGCAGAGCA	tiling
14183as	MYNRL15	CAGCTGCACGATTGGAGGAG	tiling
14188as	MYNRL15	GAGCCCAGCTGCACGATTGG	tiling
14191as	MYNRL15	CGTGAGCCCAGCTGCACGAT	tiling
14204s	MYNRL15	CGCTCCTCCAATCGTGCAGC	tiling
14205s	MYNRL15	GCTCCTCCAATCGTGCAGCT	tiling
14212s	MYNRL15	CAATCGTGCAGCTGGGCTCA	tiling
14213s	MYNRL15	AATCGTGCAGCTGGGCTCAC	tiling
14214s	MYNRL15	ATCGTGCAGCTGGGCTCACG	tiling
14217as	MYNRL15	GACCCTCAGAGCTCCCATCC	tiling
14219s	MYNRL15	GCAGCTGGGCTCACGGGGCC	tiling
14223s	MYNRL15	CTGGGCTCACGGGGCCTGGA	tiling
14224s	MYNRL15	TGGGCTCACGGGGCCTGGAT	tiling
14234s	MYNRL15	GGGCCTGGATGGGAGCTCTG	tiling
14235s	MYNRL15	GGCCTGGATGGGAGCTCTGA	tiling
14240s	MYNRL15	GGATGGGAGCTCTGAGGGTC	tiling
14241s	MYNRL15	GATGGGAGCTCTGAGGGTCT	tiling
14242s	MYNRL15	ATGGGAGCTCTGAGGGTCTG	tiling
14257as	MYNRL15	GAACACTGGTTCTCTTTCCT	tiling
14260s	MYNRL15	TGGGGCTTTAGCGTGAACCA	tiling
14271as	MYNRL15	ACAAGGTACTCTGTGAACAC	tiling
14288as	MYNRL15	GGCACAGGGCGTGGCCAACA	tiling
14294s	MYNRL15	GTGTTCACAGAGTACCTTGT	tiling
14297as	MYNRL15	CCAGTTCCTGGCACAGGGCG	tiling
14302as	MYNRL15	TACACCCAGTTCCTGGCACA	tiling
14303as	MYNRL15	GTACACCCAGTTCCTGGCAC	tiling
14309as	MYNRL15	ACCTCTGTACACCCAGTTCC	tiling
14311s	MYNRL15	TGTTGGCCACGCCCTGTGCC	tiling
14317s	MYNRL15	CCACGCCCTGTGCCAGGAAC	tiling
14318s	MYNRL15	CACGCCCTGTGCCAGGAACT	tiling
14328s	MYNRL15	GCCAGGAACTGGGTGTACAG	tiling
14337s	MYNRL15	TGGGTGTACAGAGGTAACTG	tiling
14346as	MYNRL15	CCAGCAGAGCCTGAGGGGCT	tiling
14347as	MYNRL15	CCCAGCAGAGCCTGAGGGGC	tiling
14351as	MYNRL15	AGTCCCCAGCAGAGCCTGAG	tiling
14352as	MYNRL15	GAGTCCCCAGCAGAGCCTGA	tiling
14353as	MYNRL15	TGAGTCCCCAGCAGAGCCTG	tiling
14357s	MYNRL15	AGGCACTGTCCCAGCCCCTC	tiling
14366s	MYNRL15	CCCAGCCCCTCAGGCTCTGC	tiling
14367s	MYNRL15	CCAGCCCCTCAGGCTCTGCT	tiling
14368s	MYNRL15	CAGCCCCTCAGGCTCTGCTG	tiling
14386as	MYNRL15	GAGCCTTCTCTCGGGATTGA	tiling
14394as	MYNRL15	AGAGGGAAGAGCCTTCTCTC	tiling
14395as	MYNRL15	TAGAGGGAAGAGCCTTCTCT	tiling
14403s	MYNRL15	TAACCATCAATCCCGAGAGA	tiling
14411as	MYNRL15	TAGCTTCCTCTGTAAATAGA	tiling
14412as	MYNRL15	TTAGCTTCCTCTGTAAATAG	tiling
14425s	MYNRL15	GCTCTTCCCTCTATTTACAG	tiling
14444s	MYNRL15	GAGGAAGCTAAACTTCAAAG	tiling
14458as	MYNRL15	ACTTCACAGTTGAGTGACCA	tiling
14480s	MYNRL15	GTGGTCACTCAACTGTGAAG	tiling
14491s	MYNRL15	ACTGTGAAGTGGAAGCAGAG	tiling
14495as	MYNRL15	TGAGCAGGGGCCCCGAGCCC	tiling
14497s	MYNRL15	AAGTGGAAGCAGAGAGGTCC	tiling
14498s	MYNRL15	AGTGGAAGCAGAGAGGTCCA	tiling
14503s	MYNRL15	AAGCAGAGAGGTCCAGGGCT	tiling
14504s	MYNRL15	AGCAGAGAGGTCCAGGGCTC	tiling
14505s	MYNRL15	GCAGAGAGGTCCAGGGCTCG	tiling
14508as	MYNRL15	GATGCAGCACTGGTGAGCAG	tiling
14509as	MYNRL15	GGATGCAGCACTGGTGAGCA	tiling
14510as	MYNRL15	AGGATGCAGCACTGGTGAGC	tiling
14518as	MYNRL15	CACGGCATAGGATGCAGCAC	tiling
