# Supplementary material for: Myeloid leukemia vulnerabilities at CTCF-enriched long noncoding RNA loci
Source: Research Square preprint supplement (doi:10.21203/rs.3.rs-727909/v1), 2021-08-09
Supplement: Supplementary file 6 [file 21d23be58406884f03cadd56.xlsx]

## Sheet: sample info
Supplementary Table 11: CTCF-enriched lncRNA loci (C-LNC) catalog
Cell	Class	Type	Tissue	Cancer / normal	Tier	ENCODE experiment	Accession no	# C-LNC
K562	cell line	leukemia	blood	cancer	1	ENCSR000AKO	ENCFF519CXF	531
GM12878	cell line	B-lymphocyte	blood	normal	1	ENCSR000DZN	ENCFF960ZGP	509
H1-hESC	cell line	embryonic stem cell	embryonic	normal	1	ENCSR000BNH	ENCFF821AQO	615
A549	cell line	lung carcinoma	epithelial	cancer	2	ENCSR000DNA	ENCFF535MZG	503
HeLa-S3	cell line	cervical carcinoma	cervix	cancer	2	ENCSR000AOA	ENCFF502CZS	536
IMR90	cell line	fetal lung fibroblasts	lung	normal	2	ENCSR000EFI	ENCFF307XFM	524
MCF-7	cell line	mammary gland adenocarcinoma	breast	cancer	2	ENCSR000DWH	ENCFF867BUQ	676
HCT-116	cell line	colorectal carninoma	colon	cancer	3	ENCSR000DTO	ENCFF171SNH	592
HEK293	cell line	embryonic kidney	kidney	normal	3	ENCSR617IFZ	ENCFF285QVL	496
HL-60	cell line	acute myeloid leukemia	blood	cancer	3	ENCSR000DUP	ENCFF432AMS	332
NB4	cell line	acute myeloid leukemia	blood	cancer	3	ENCSR000DWN	ENCFF456PDQ	467
CD14+ monocyte	primary cell	monocyte	blood	normal	2	ENCSR000ATN	ENCFF300XXC	456
B cell	primary cell	B-lymphocyte	blood	normal	2	ENCSR000AUV	ENCFF910TER	537
neutrophil	primary cell	neutrophil	blood	normal	3	ENCSR785YRL	ENCFF122IMV	338
fibroblast lung	primary cell	fibroblast	lung	normal	3	ENCSR000DVA	ENCFF777ODE	548
kidney epithelial cell	primary cell	kidney epithelial	kidney	normal	3	ENCSR000DVH	ENCFF674KUN	538
cardiac muscle cell	primary cell	cardiac muscle	heart	normal	3	ENCSR000DTI	ENCFF301YXM	588
osteoblast	primary cell	osteoblast	bone	normal	3	ENCSR000APF	ENCFF744PXO	527

## Sheet: K562
chromosome	start	end	width	strand	gene id	gene type	gene name	havana gene	biotype	CTCF count	CTCF density
chr1	1399522	1402046	2524	+	ENSG00000224870.6	processed_transcript	RP4-758J18.2	OTTHUMG00000002908.4	processed_transcript	3	1.18859
chr1	2049203	2050070	867	-	ENSG00000226969.1	antisense	RP11-547D24.3	OTTHUMG00000041087.1	lncRNA	1	1.1534
chr1	3785008	3785538	530	+	ENSG00000272153.1	antisense	RP1-286D6.5	OTTHUMG00000185643.1	lncRNA	1	1.88679
chr1	6204840	6205780	940	-	ENSG00000226944.1	antisense	RP1-120G22.11	OTTHUMG00000041452.1	lncRNA	1	1.06383
chr1	6393555	6394391	836	+	ENSG00000271746.1	antisense	RP1-202O8.3	OTTHUMG00000185645.1	lncRNA	1	1.19617
chr1	7942372	7942726	354	+	ENSG00000270330.1	processed_pseudogene	RP5-892F13.2	OTTHUMG00000184257.1	pseudogene	1	2.82486
chr1	8831007	8831375	368	+	ENSG00000229716.2	processed_pseudogene	RPL23AP19	OTTHUMG00000001780.3	pseudogene	1	2.71739
chr1	8878835	8879894	1059	+	ENSG00000230679.1	antisense	ENO1-AS1	OTTHUMG00000001779.1	lncRNA	1	0.944287
chr1	10429881	10430677	796	-	ENSG00000271989.1	antisense	RP4-736L20.3	OTTHUMG00000185648.1	lncRNA	1	1.25628
chr1	20732880	20733952	1072	+	ENSG00000233069.1	antisense	RP5-930J4.2	OTTHUMG00000002621.1	lncRNA	2	1.86567
chr1	22023994	22024968	974	-	ENSG00000228397.1	lincRNA	RP1-224A6.3	OTTHUMG00000002754.1	lincRNA	2	2.05339
chr1	23368997	23371839	2842	+	ENSG00000249087.6	antisense	ZNF436-AS1	OTTHUMG00000003225.2	lncRNA	3	1.05559
chr1	23949016	23949383	367	-	ENSG00000230228.2	processed_pseudogene	RP11-4M23.4	OTTHUMG00000013896.2	pseudogene	1	2.7248
chr1	31789130	31791322	2192	+	ENSG00000254545.1	antisense	RP11-84A19.3	OTTHUMG00000165113.1	lncRNA	2	0.912409
chr1	44103306	44104703	1397	-	ENSG00000271647.1	processed_pseudogene	KRT8P47	OTTHUMG00000184285.1	pseudogene	1	0.71582
chr1	47179250	47180339	1089	+	ENSG00000224805.2	antisense	LINC00853	OTTHUMG00000007850.2	lncRNA	1	0.918274
chr1	47432133	47434641	2508	-	ENSG00000237424.1	antisense	FOXD2-AS1	OTTHUMG00000007949.2	lncRNA	2	0.797448
chr1	51707138	51708137	999	-	ENSG00000236973.2	processed_pseudogene	GAPDHP51	OTTHUMG00000008961.2	pseudogene	1	1.001
chr1	53291791	53292138	347	-	ENSG00000225030.1	sense_intronic	RP4-784A16.3	OTTHUMG00000008933.1	lncRNA	1	2.88184
chr1	62530636	62530873	237	+	ENSG00000270549.1	processed_pseudogene	RP11-293K19.1	OTTHUMG00000184290.1	pseudogene	1	4.21941
chr1	68161761	68163090	1329	-	ENSG00000234383.1	processed_pseudogene	CTBP2P8	OTTHUMG00000009154.1	pseudogene	1	0.752445
chr1	74468195	74469543	1348	+	ENSG00000233894.1	antisense	RP4-650F12.2	OTTHUMG00000009610.1	lncRNA	1	0.74184
chr1	86703502	86704462	960	-	ENSG00000261737.1	antisense	RP4-612B15.3	OTTHUMG00000175864.1	lncRNA	1	1.04167
chr1	92749175	92749330	155	-	ENSG00000234202.2	processed_pseudogene	RP11-330C7.4	OTTHUMG00000010893.2	pseudogene	1	6.45161
chr1	109100193	109100619	426	+	ENSG00000270066.3	lincRNA	SCARNA2	OTTHUMG00000184013.1	lincRNA	1	2.34742
chr1	110963302	110964649	1347	+	ENSG00000273010.1	antisense	RP11-96K19.5	OTTHUMG00000186361.1	lncRNA	2	1.48478
chr1	119886304	119886927	623	+	ENSG00000226446.1	processed_pseudogene	NOTCH2P1	OTTHUMG00000057603.1	pseudogene	1	1.60514
chr1	145892847	145893483	636	+	ENSG00000244619.2	antisense	RP11-315I20.3	OTTHUMG00000042455.2	lncRNA	1	1.57233
chr1	147840962	147842359	1397	+	ENSG00000223728.3	processed_pseudogene	RP11-314N2.2	OTTHUMG00000037548.2	pseudogene	1	0.71582
chr1	150255095	150257286	2191	-	ENSG00000276110.1	antisense	RP4-790G17.7	OTTHUMG00000185690.2	lncRNA	2	0.912825
chr1	151340648	151341966	1318	+	ENSG00000224645.1	antisense	RP11-126K1.8	OTTHUMG00000073673.1	lncRNA	1	0.758725
chr1	154480012	154481501	1489	+	ENSG00000273110.1	antisense	RP11-350G8.9	OTTHUMG00000186422.1	lncRNA	1	0.671592
chr1	154553609	154555017	1408	+	ENSG00000229780.1	antisense	UBE2Q1-AS1	OTTHUMG00000037263.1	lncRNA	1	0.710227
chr1	154961825	154962623	798	+	ENSG00000271380.1	antisense	RP11-307C12.12	OTTHUMG00000185142.1	lncRNA	1	1.25313
chr1	155045191	155046118	927	-	ENSG00000232093.1	antisense	RP11-307C12.11	OTTHUMG00000041316.1	lncRNA	2	2.1575
chr1	157073257	157074703	1446	+	ENSG00000224520.2	processed_pseudogene	KRT8P45	OTTHUMG00000041329.2	pseudogene	3	2.07469
chr1	169486076	169486986	910	+	ENSG00000213062.4	lincRNA	RP1-206D15.6	OTTHUMG00000186558.1	lincRNA	1	1.0989
chr1	179447578	179448440	862	-	ENSG00000224620.2	processed_pseudogene	MEF2AP1	OTTHUMG00000035267.2	pseudogene	2	2.32019
chr1	179881607	179882595	988	-	ENSG00000272906.1	lincRNA	RP11-533E19.7	OTTHUMG00000186037.1	lincRNA	1	1.01215
chr1	179953184	179954440	1256	-	ENSG00000260360.1	lincRNA	RP11-533E19.5	OTTHUMG00000176152.1	lincRNA	1	0.796178
chr1	181190471	181191149	678	-	ENSG00000225359.1	lincRNA	RP11-540K16.2	OTTHUMG00000035181.1	lincRNA	1	1.47493
chr1	201222113	201223123	1010	-	ENSG00000229821.1	antisense	RP11-567E21.3	OTTHUMG00000040658.1	lncRNA	1	0.990099
chr1	204528845	204529692	847	-	ENSG00000236779.1	processed_pseudogene	RP11-430C7.2	OTTHUMG00000035988.1	pseudogene	1	1.18064
chr1	206907619	206908229	610	+	ENSG00000226945.1	processed_pseudogene	RP11-564A8.4	OTTHUMG00000036458.1	pseudogene	1	1.63934
chr1	223144049	223144954	905	+	ENSG00000236846.1	lincRNA	RP11-239E10.2	OTTHUMG00000037934.2	lincRNA	1	1.10497
chr1	227234269	227235355	1086	+	ENSG00000228729.1	processed_pseudogene	RP11-211A18.2	OTTHUMG00000037614.1	pseudogene	1	0.92081
chr1	228073909	228076550	2641	-	ENSG00000276255.2	lincRNA	RP5-881P19.7	OTTHUMG00000189299.1	lincRNA	2	0.757289
chr1	228650241	228651379	1138	+	ENSG00000183929.7	processed_pseudogene	DUSP5P1	OTTHUMG00000037916.3	pseudogene	1	0.878735
chr1	234607008	234609483	2475	+	ENSG00000228830.1	antisense	RP4-781K5.2	OTTHUMG00000037978.1	lncRNA	3	1.21212
chr1	235104180	235104609	429	-	ENSG00000273416.1	lincRNA	RP4-597N16.4	OTTHUMG00000185835.1	lincRNA	1	2.331
chr1	244969350	244971088	1738	-	ENSG00000272195.1	antisense	RP11-156E8.1	OTTHUMG00000185820.1	lncRNA	2	1.15075
chr1	247833349	247834288	939	-	ENSG00000230576.1	unprocessed_pseudogene	OR6R1P	OTTHUMG00000040202.1	pseudogene	2	2.12993
chr1	247936061	247937513	1452	-	ENSG00000226191.3	processed_pseudogene	CLK3P2	OTTHUMG00000040208.2	pseudogene	1	0.688705
chr2	7671604	7672246	642	-	ENSG00000230515.1	lincRNA	AC092580.3	OTTHUMG00000151592.1	lincRNA	1	1.55763
chr2	9555899	9556775	876	+	ENSG00000271855.1	lincRNA	RP11-214N9.1	OTTHUMG00000185545.1	lincRNA	1	1.14155
chr2	12715415	12716227	812	+	ENSG00000261117.1	lincRNA	RP11-333O1.1	OTTHUMG00000175731.1	lincRNA	2	2.46305
chr2	20451042	20452947	1905	+	ENSG00000228950.1	lincRNA	AC023137.2	OTTHUMG00000151780.1	lincRNA	2	1.04987
chr2	28396815	28397110	295	+	ENSG00000270640.1	sense_intronic	RP11-373D23.2	OTTHUMG00000185291.1	lncRNA	1	3.38983
chr2	38535258	38536249	991	-	ENSG00000271443.1	transcribed_processed_pseudogene	RP11-541E12.1	OTTHUMG00000184445.1	pseudogene	1	1.00908
chr2	55617909	55618373	464	+	ENSG00000272606.1	antisense	RP11-554J4.1	OTTHUMG00000185926.1	lncRNA	1	2.15517
chr2	64644612	64646698	2086	+	ENSG00000226756.1	lincRNA	AC007365.3	OTTHUMG00000152702.1	lincRNA	2	0.958773
chr2	70301451	70302072	621	+	ENSG00000233849.1	antisense	AC022201.5	OTTHUMG00000154180.1	lncRNA	1	1.61031
chr2	85186409	85187253	844	+	ENSG00000231134.1	sense_intronic	TCF7L1-IT1	OTTHUMG00000153211.1	lncRNA	1	1.18483
chr2	94737337	94738249	912	+	ENSG00000213355.3	processed_pseudogene	CNN2P8	OTTHUMG00000155130.1	pseudogene	1	1.09649
chr2	95413456	95414296	840	-	ENSG00000248821.1	unprocessed_pseudogene	AC009238.6	OTTHUMG00000155175.1	pseudogene	1	1.19048
chr2	102411243	102412108	865	+	ENSG00000236785.1	processed_pseudogene	AC007248.7	OTTHUMG00000153095.1	pseudogene	1	1.15607
chr2	106543014	106544297	1283	+	ENSG00000232001.1	lincRNA	AC108868.6	OTTHUMG00000153180.1	lincRNA	2	1.55885
chr2	111887914	111888741	827	+	ENSG00000236307.2	processed_pseudogene	EEF1E1P1	OTTHUMG00000153261.2	pseudogene	1	1.20919
chr2	112346011	112346258	247	+	ENSG00000236555.1	processed_pseudogene	AC115115.4	OTTHUMG00000153285.1	pseudogene	1	4.04858
chr2	169790093	169790885	792	+	ENSG00000214369.2	processed_pseudogene	AC009967.3	OTTHUMG00000153985.1	pseudogene	1	1.26263
chr2	171491422	171491931	509	+	ENSG00000228507.1	processed_pseudogene	DAP3P2	OTTHUMG00000154084.1	pseudogene	1	1.96464
chr2	172674212	172674898	686	-	ENSG00000230104.1	processed_pseudogene	AC018712.2	OTTHUMG00000154093.1	pseudogene	2	2.91545
chr2	177264359	177265515	1156	+	ENSG00000222043.2	antisense	AC079305.10	OTTHUMG00000154178.1	lncRNA	1	0.865052
chr2	181961212	181962478	1266	-	ENSG00000213958.2	processed_pseudogene	KRT18P29	OTTHUMG00000154327.1	pseudogene	1	0.789889
chr2	183071040	183072486	1446	-	ENSG00000231203.1	processed_pseudogene	KRT8P10	OTTHUMG00000154237.2	pseudogene	1	0.691563
chr2	187001876	187003377	1501	-	ENSG00000226553.1	processed_pseudogene	AC018735.1	OTTHUMG00000154260.1	pseudogene	1	0.666223
chr2	189762704	189765556	2852	+	ENSG00000253559.1	antisense	OSGEPL1-AS1	OTTHUMG00000164097.1	lncRNA	3	1.05189
chr2	202032770	202033537	767	-	ENSG00000273209.1	lincRNA	RP11-107N15.1	OTTHUMG00000186300.1	lincRNA	1	1.30378
chr2	208255247	208256181	934	+	ENSG00000231908.1	antisense	IDH1-AS1	OTTHUMG00000154707.1	lncRNA	1	1.07066
chr2	208269343	208269957	614	-	ENSG00000228380.1	processed_pseudogene	MYL6BP1	OTTHUMG00000154704.1	pseudogene	1	1.62866
chr2	208466238	208466626	388	-	ENSG00000227430.1	processed_pseudogene	AC019185.2	OTTHUMG00000154661.1	pseudogene	1	2.57732
chr2	213152970	213153659	689	+	ENSG00000270659.1	lincRNA	RP11-105N14.1	OTTHUMG00000185233.1	lincRNA	1	1.45138
chr2	218953401	218954050	649	-	ENSG00000224928.2	processed_pseudogene	KRT8P30	OTTHUMG00000154667.1	pseudogene	2	3.08166
chr2	231452195	231453153	958	+	ENSG00000233538.1	lincRNA	AC017104.2	OTTHUMG00000153867.1	lincRNA	1	1.04384
chr2	241724615	241725693	1078	-	ENSG00000235351.1	antisense	AC114730.11	OTTHUMG00000151506.1	lncRNA	1	0.927644
chr2	241734715	241735498	783	-	ENSG00000215692.2	antisense	AC114730.8	OTTHUMG00000151478.1	lncRNA	1	1.27714
chr3	12787393	12788671	1278	-	ENSG00000213943.3	processed_pseudogene	KRT18P17	OTTHUMG00000155395.1	pseudogene	1	0.782473
chr3	13926813	13927778	965	+	ENSG00000233121.1	unitary_pseudogene	VN1R20P	OTTHUMG00000154485.1	pseudogene	1	1.03627
chr3	17877455	17878169	714	-	ENSG00000214286.2	processed_pseudogene	PDCL3P3	OTTHUMG00000155541.1	pseudogene	1	1.40056
chr3	25441164	25441502	338	-	ENSG00000229421.1	processed_pseudogene	AC133141.1	OTTHUMG00000155597.2	pseudogene	1	2.95858
chr3	26712307	26713364	1057	+	ENSG00000234165.1	lincRNA	AC114877.3	OTTHUMG00000155686.1	lincRNA	1	0.946074
chr3	43087479	43088068	589	+	ENSG00000227245.1	lincRNA	RP11-136C24.2	OTTHUMG00000156464.1	lincRNA	1	1.69779
chr3	52239258	52241097	1839	+	ENSG00000243224.1	antisense	RP5-1157M23.2	OTTHUMG00000158107.1	lncRNA	2	1.08755
chr3	70753854	70754573	719	+	ENSG00000243873.1	processed_pseudogene	HMGB1P36	OTTHUMG00000158798.1	pseudogene	1	1.39082
chr3	109396616	109397870	1254	+	ENSG00000244561.1	processed_pseudogene	RP11-702L6.1	OTTHUMG00000159214.1	pseudogene	1	0.797448
chr3	109409678	109410084	406	-	ENSG00000230618.3	processed_pseudogene	H3F3AP3	OTTHUMG00000159215.1	pseudogene	1	2.46305
chr3	125679573	125679781	208	+	ENSG00000243072.1	processed_pseudogene	GS1-388B5.2	OTTHUMG00000159570.1	pseudogene	1	4.80769
chr3	131526447	131527179	732	+	ENSG00000248530.1	processed_pseudogene	BCL2L12P1	OTTHUMG00000159630.2	pseudogene	2	2.73224
chr3	138101478	138102917	1439	-	ENSG00000240668.1	processed_pseudogene	KRT8P36	OTTHUMG00000159822.1	pseudogene	1	0.694927
chr3	156044155	156044948	793	-	ENSG00000242017.1	processed_pseudogene	ALG1L15P	OTTHUMG00000158546.1	pseudogene	1	1.26103
chr3	156671862	156674378	2516	-	ENSG00000243926.1	antisense	TIPARP-AS1	OTTHUMG00000158643.1	lncRNA	2	0.794913
chr3	157162663	157163932	1269	-	ENSG00000244515.1	processed_pseudogene	KRT18P34	OTTHUMG00000158716.1	pseudogene	1	0.788022
chr3	170062244	170062951	707	+	ENSG00000242583.1	processed_pseudogene	RP11-379K17.9	OTTHUMG00000158778.1	pseudogene	1	1.41443
chr3	170495627	170496636	1009	+	ENSG00000241416.1	processed_pseudogene	KRT8P13	OTTHUMG00000158860.1	pseudogene	2	1.98216
chr3	179649494	179650200	706	-	ENSG00000243977.1	processed_pseudogene	RP11-473P24.2	OTTHUMG00000157785.1	pseudogene	1	1.41643
chr3	184134019	184135238	1219	-	ENSG00000272721.5	antisense	RP11-778D9.12	OTTHUMG00000186109.1	lncRNA	1	0.820345
chr3	184741937	184742462	525	+	ENSG00000273403.1	lincRNA	RP11-329B9.3	OTTHUMG00000186128.1	lincRNA	1	1.90476
chr3	196527339	196528791	1452	-	ENSG00000213358.3	unprocessed_pseudogene	AC092933.4	OTTHUMG00000155583.1	pseudogene	1	0.688705
chr4	1356581	1358075	1494	+	ENSG00000254094.1	sense_intronic	AC078852.1	OTTHUMG00000163525.1	lncRNA	1	0.669344
chr4	3323977	3324762	785	-	ENSG00000248843.1	processed_pseudogene	RP11-357G3.1	OTTHUMG00000157427.1	pseudogene	1	1.27389
chr4	26859806	26860599	793	-	ENSG00000240005.5	antisense	RP11-293A21.1	OTTHUMG00000159680.2	lncRNA	2	2.52207
chr4	55547112	55547889	777	+	ENSG00000272969.1	antisense	RP11-528I4.2	OTTHUMG00000186305.1	lncRNA	1	1.287
chr4	70703747	70704491	744	-	ENSG00000272986.1	antisense	RP11-46J23.1	OTTHUMG00000186293.1	lncRNA	1	1.34409
chr4	84244003	84245488	1485	+	ENSG00000214980.4	processed_pseudogene	RP11-274J2.1	OTTHUMG00000160895.1	pseudogene	1	0.673401
chr4	126106139	126106923	784	-	ENSG00000251005.1	processed_pseudogene	RP11-318I4.2	OTTHUMG00000161148.1	pseudogene	1	1.27551
chr4	128069014	128069612	598	-	ENSG00000241651.4	processed_pseudogene	RP11-214O14.1	OTTHUMG00000157552.2	pseudogene	1	1.67224
chr4	138560704	138561941	1237	+	ENSG00000248795.1	processed_pseudogene	RP11-173E2.1	OTTHUMG00000161280.1	pseudogene	1	0.808407
chr4	144572238	144572983	745	+	ENSG00000250504.2	processed_pseudogene	KRT18P51	OTTHUMG00000161431.2	pseudogene	1	1.34228
chr4	146241806	146243669	1863	+	ENSG00000251010.1	antisense	RP11-6L6.7	OTTHUMG00000162030.1	lncRNA	4	2.14707
chr4	151407551	151408835	1284	-	ENSG00000251611.1	lincRNA	RP11-610P16.1	OTTHUMG00000161670.1	lincRNA	1	0.778816
chr4	157204462	157204855	393	-	ENSG00000249819.1	processed_pseudogene	RP11-392C20.1	OTTHUMG00000161953.1	pseudogene	1	2.54453
chr4	165016887	165017433	546	+	ENSG00000276623.1	processed_pseudogene	RP11-366M4.19	OTTHUMG00000187585.1	pseudogene	1	1.8315
chr4	169791221	169791702	481	-	ENSG00000229204.3	processed_pseudogene	PTGES3P3	OTTHUMG00000160905.1	pseudogene	1	2.079
chr4	185471516	185472263	747	+	ENSG00000249679.1	antisense	RP11-279O9.4	OTTHUMG00000160454.1	lncRNA	1	1.33869
chr5	195778	196341	563	+	ENSG00000261434.1	sense_overlapping	CTD-2083E4.7	OTTHUMG00000175446.1	lncRNA	2	3.5524
chr5	10627260	10628225	965	-	ENSG00000250106.1	antisense	ANKRD33B-AS1	OTTHUMG00000162124.1	lncRNA	1	1.03627
chr5	10775058	10777062	2004	-	ENSG00000250576.1	lincRNA	CTD-2154B17.1	OTTHUMG00000162122.1	lincRNA	2	0.998004
chr5	13250235	13250662	427	-	ENSG00000242608.1	processed_pseudogene	RPS23P5	OTTHUMG00000157616.1	pseudogene	1	2.34192
chr5	17620533	17620939	406	-	ENSG00000250351.1	processed_pseudogene	RP11-432M8.10	OTTHUMG00000161841.1	pseudogene	1	2.46305
chr5	33997044	33997724	680	-	ENSG00000250767.1	processed_pseudogene	RP11-1084J3.3	OTTHUMG00000162528.1	pseudogene	1	1.47059
chr5	41967139	41968366	1227	-	ENSG00000249266.1	processed_pseudogene	MTHFD2P6	OTTHUMG00000162085.2	pseudogene	1	0.814996
chr5	43231812	43233173	1361	-	ENSG00000247763.2	processed_pseudogene	RP11-447H19.1	OTTHUMG00000162228.2	pseudogene	2	1.46951
chr5	71475761	71476316	555	-	ENSG00000253536.1	processed_pseudogene	RP11-1174L13.2	OTTHUMG00000163655.1	pseudogene	1	1.8018
chr5	73451498	73453395	1897	+	ENSG00000251604.1	lincRNA	LINC01385	OTTHUMG00000162491.1	lincRNA	2	1.0543
chr5	78222184	78222517	333	+	ENSG00000249372.1	processed_pseudogene	ATP6V1G1P6	OTTHUMG00000162480.1	pseudogene	1	3.003
chr5	88602780	88603117	337	+	ENSG00000250705.1	processed_pseudogene	CTC-470C15.1	OTTHUMG00000162633.1	pseudogene	1	2.96736
chr5	91226475	91227071	596	-	ENSG00000251093.1	lincRNA	RP11-414H23.3	OTTHUMG00000162808.1	lincRNA	1	1.67785
chr5	109467353	109467952	599	+	ENSG00000251367.1	lincRNA	RP11-231G15.2	OTTHUMG00000163118.1	lincRNA	1	1.66945
chr5	109588338	109589592	1254	+	ENSG00000214794.4	processed_pseudogene	KRT18P42	OTTHUMG00000162835.1	pseudogene	1	0.797448
chr5	112419583	112420978	1395	+	ENSG00000278921.2	lincRNA	EPB41L4A-AS2	OTTHUMG00000169519.1	lincRNA	1	0.716846
chr5	115770586	115770989	403	+	ENSG00000251118.1	processed_pseudogene	CTC-505O3.1	OTTHUMG00000162915.2	pseudogene	1	2.48139
chr5	139775305	139775472	167	+	ENSG00000271792.1	lincRNA	CTB-35F21.5	OTTHUMG00000185580.1	lincRNA	1	5.98802
chr5	140875346	140875922	576	-	ENSG00000278915.1	antisense	AC005609.18	OTTHUMG00000189138.1	lncRNA	2	3.47222
chr5	141350109	141350662	553	-	ENSG00000280026.1	antisense	AC005618.8	OTTHUMG00000189141.1	lncRNA	2	3.61664
chr5	147887112	147887704	592	+	ENSG00000251320.1	antisense	CTC-327F10.4	OTTHUMG00000163419.1	lncRNA	1	1.68919
chr5	149430286	149432834	2548	+	ENSG00000269936.3	lincRNA	RP11-394O4.5	OTTHUMG00000184101.1	lincRNA	2	0.784929
chr5	158173601	158176422	2821	-	ENSG00000253792.1	lincRNA	CTC-436K13.5	OTTHUMG00000163534.1	lincRNA	2	0.708968
chr5	159950493	159951498	1005	-	ENSG00000248626.1	processed_pseudogene	GAPDHP40	OTTHUMG00000159985.1	pseudogene	1	0.995025
chr5	173144162	173145039	877	-	ENSG00000253172.1	antisense	CTC-209H22.3	OTTHUMG00000163320.1	lncRNA	1	1.14025
chr5	174056060	174056585	525	-	ENSG00000253244.1	antisense	RP11-619L12.3	OTTHUMG00000163446.1	lncRNA	1	1.90476
chr5	177554824	177555364	540	+	ENSG00000272459.1	lincRNA	RP11-1277A3.3	OTTHUMG00000185636.1	lincRNA	1	1.85185
chr5	180293245	180295253	2008	+	ENSG00000248367.1	antisense	CTB-129O4.1	OTTHUMG00000163311.1	lncRNA	2	0.996016
chr6	2910613	2912113	1500	-	ENSG00000232999.1	unitary_pseudogene	RP1-90J20.10	OTTHUMG00000155040.1	pseudogene	1	0.666667
chr6	2916894	2917733	839	+	ENSG00000228365.1	lincRNA	RP1-90J20.2	OTTHUMG00000014132.1	lincRNA	2	2.38379
chr6	3055890	3056761	871	+	ENSG00000229282.1	lincRNA	RP1-40E16.2	OTTHUMG00000014139.1	lincRNA	1	1.14811
chr6	3068045	3068894	849	-	ENSG00000272277.1	antisense	RP1-40E16.12	OTTHUMG00000185651.1	lncRNA	2	2.35571
chr6	3978062	3979099	1037	+	ENSG00000216657.1	processed_pseudogene	GLRX3P2	OTTHUMG00000014155.1	pseudogene	1	0.96432
chr6	4018713	4019202	489	+	ENSG00000272248.1	lincRNA	RP3-406P24.4	OTTHUMG00000185653.1	lincRNA	1	2.04499
chr6	6758276	6759291	1015	-	ENSG00000224532.2	lincRNA	RP3-470L22.1	OTTHUMG00000014193.2	lincRNA	1	0.985222
chr6	7338839	7339568	729	-	ENSG00000220472.1	processed_pseudogene	RP11-69L16.5	OTTHUMG00000014205.1	pseudogene	2	2.74348
chr6	13614111	13615155	1044	-	ENSG00000261071.1	antisense	RP1-223E5.4	OTTHUMG00000175899.1	lncRNA	1	0.957854
chr6	25732497	25732827	330	+	ENSG00000216436.2	processed_pseudogene	HIST1H2APS1	OTTHUMG00000014405.2	pseudogene	1	3.0303
chr6	26321876	26322292	416	-	ENSG00000220875.1	processed_pseudogene	HIST1H3PS1	OTTHUMG00000014455.1	pseudogene	1	2.40385
chr6	27807075	27807339	264	+	ENSG00000217862.2	processed_pseudogene	HIST1H4PS1	OTTHUMG00000016429.2	pseudogene	1	3.78788
chr6	28217643	28218634	991	-	ENSG00000176933.5	processed_pseudogene	TOB2P1	OTTHUMG00000014512.1	pseudogene	1	1.00908
chr6	28837869	28839006	1137	-	ENSG00000225173.1	lincRNA	XXbac-BPG308K3.5	OTTHUMG00000084883.1	lincRNA	1	0.879507
chr6	28896530	28897322	792	+	ENSG00000224157.1	antisense	HCG14	OTTHUMG00000031281.1	lncRNA	1	1.26263
chr6	29071824	29072599	775	-	ENSG00000236909.1	unprocessed_pseudogene	OR2P1P	OTTHUMG00000031042.3	pseudogene	1	1.29032
chr6	33365548	33366243	695	-	ENSG00000228285.2	processed_pseudogene	LYPLA2P1	OTTHUMG00000031128.2	pseudogene	1	1.43885
chr6	34189780	34191079	1299	+	ENSG00000271231.1	processed_pseudogene	KRT18P9	OTTHUMG00000184543.1	pseudogene	1	0.769823
chr6	44073913	44077952	4039	+	ENSG00000231881.1	lincRNA	RP5-1120P11.3	OTTHUMG00000014754.1	lincRNA	3	0.742758
chr6	45421079	45422005	926	-	ENSG00000271857.1	antisense	RP1-244F24.1	OTTHUMG00000185755.1	lncRNA	1	1.07991
chr6	72522641	72523238	597	+	ENSG00000217483.1	processed_pseudogene	RP11-135M8__A.1	OTTHUMG00000015011.1	pseudogene	1	1.67504
chr6	85659892	85660606	714	-	ENSG00000220563.1	processed_pseudogene	PKMP3	OTTHUMG00000015143.1	pseudogene	1	1.40056
chr6	89301783	89303114	1331	+	ENSG00000220418.1	processed_pseudogene	TUBB3P1	OTTHUMG00000015197.1	pseudogene	1	0.751315
chr6	109382795	109383666	871	+	ENSG00000260273.1	antisense	RP11-425D10.10	OTTHUMG00000175937.1	lncRNA	1	1.14811
chr6	136550661	136552554	1893	+	ENSG00000272189.1	antisense	RP3-325F22.5	OTTHUMG00000185823.1	lncRNA	2	1.05652
chr6	137705423	137707201	1778	-	ENSG00000220412.1	processed_pseudogene	RP11-95M15.2	OTTHUMG00000015660.1	pseudogene	2	1.12486
chr6	138402585	138403560	975	-	ENSG00000215878.3	processed_pseudogene	MARCKSL1P2	OTTHUMG00000015672.2	pseudogene	1	1.02564
chr6	144036618	144037704	1086	+	ENSG00000217231.2	processed_pseudogene	RP3-340H11.2	OTTHUMG00000015735.3	pseudogene	1	0.92081
chr6	147406889	147408281	1392	+	ENSG00000220494.4	processed_pseudogene	YAP1P1	OTTHUMG00000015765.2	pseudogene	1	0.718391
chr6	152898047	152899280	1233	+	ENSG00000217372.2	processed_pseudogene	TUBB4BP7	OTTHUMG00000015853.2	pseudogene	1	0.81103
chr6	156662050	156662437	387	+	ENSG00000220347.1	processed_pseudogene	RP11-230C9.1	OTTHUMG00000015886.1	pseudogene	2	5.16796
chr6	156776360	156778422	2062	-	ENSG00000271551.2	antisense	RP11-230C9.2	OTTHUMG00000185117.2	lncRNA	2	0.969932
chr6	157872571	157875210	2639	-	ENSG00000229502.5	antisense	RP11-52J3.2	OTTHUMG00000015897.1	lncRNA	2	0.757863
chr6	164346489	164348644	2155	-	ENSG00000226739.1	lincRNA	RP11-347L18.1	OTTHUMG00000015981.1	lincRNA	2	0.928074
chr6	166275462	166277077	1615	-	ENSG00000280850.1	lincRNA	RP4-655C5.9	OTTHUMG00000190284.1	lincRNA	2	1.23839
chr6	167767083	167768568	1485	-	ENSG00000213065.2	processed_pseudogene	RP3-431P23.2	OTTHUMG00000016028.1	pseudogene	1	0.673401
chr7	5428731	5429672	941	+	ENSG00000273084.1	lincRNA	RP11-1275H24.3	OTTHUMG00000186132.1	lincRNA	1	1.0627
chr7	22725395	22727620	2225	-	ENSG00000179428.2	antisense	AC073072.5	OTTHUMG00000152547.1	lncRNA	2	0.898876
chr7	23811144	23811660	516	-	ENSG00000231328.1	processed_pseudogene	TPT1P7	OTTHUMG00000152552.2	pseudogene	1	1.93798
chr7	27269357	27269678	321	-	ENSG00000213783.4	processed_pseudogene	RPL35P4	OTTHUMG00000033372.3	pseudogene	1	3.11526
chr7	33128988	33129143	155	-	ENSG00000228015.1	processed_pseudogene	AC074338.5	OTTHUMG00000153034.1	pseudogene	1	6.45161
chr7	35971147	35971567	420	-	ENSG00000270889.1	processed_pseudogene	RP11-609L3.1	OTTHUMG00000184662.1	pseudogene	1	2.38095
chr7	39947522	39949755	2233	-	ENSG00000259826.1	antisense	RP11-467D6.1	OTTHUMG00000173374.1	lncRNA	2	0.895656
chr7	45391626	45392205	579	-	ENSG00000234359.3	processed_pseudogene	ELK1P1	OTTHUMG00000159177.1	pseudogene	1	1.72712
chr7	50141540	50142823	1283	-	ENSG00000228005.1	antisense	AC020743.2	OTTHUMG00000155880.1	lncRNA	1	0.779423
chr7	55593777	55595006	1229	+	ENSG00000231394.1	lincRNA	RP11-310H4.3	OTTHUMG00000156122.1	lincRNA	1	0.81367
chr7	65235790	65236723	933	-	ENSG00000237026.1	processed_pseudogene	RP11-328P23.2	OTTHUMG00000156728.1	pseudogene	2	2.14362
chr7	66606738	66607107	369	-	ENSG00000225573.4	processed_pseudogene	RPL35P5	OTTHUMG00000156759.1	pseudogene	1	2.71003
chr7	73735038	73736054	1016	+	ENSG00000225969.1	antisense	ABHD11-AS1	OTTHUMG00000153263.1	lncRNA	1	0.984252
chr7	100963828	100968124	4296	-	ENSG00000274993.1	antisense	RP11-395B7.2	OTTHUMG00000157043.3	lncRNA	3	0.698324
chr7	105013425	105014321	896	-	ENSG00000239569.3	antisense	KMT2E-AS1	OTTHUMG00000157280.1	lncRNA	1	1.11607
chr7	107742817	107744581	1764	-	ENSG00000241764.3	antisense	AC002467.7	OTTHUMG00000154805.3	lncRNA	2	1.13379
chr7	113415689	113416322	633	+	ENSG00000270997.1	processed_pseudogene	RP11-703P11.1	OTTHUMG00000184435.1	pseudogene	1	1.57978
chr7	131753746	131754252	506	-	ENSG00000236281.1	processed_pseudogene	AC093106.5	OTTHUMG00000155054.1	pseudogene	2	3.95257
chr7	134734898	134735129	231	-	ENSG00000230101.5	processed_pseudogene	TUBB3P2	OTTHUMG00000155458.1	pseudogene	1	4.329
chr7	135168403	135169547	1144	+	ENSG00000272941.1	antisense	RP11-134L10.1	OTTHUMG00000186343.1	lncRNA	1	0.874126
chr7	135704537	135704841	304	+	ENSG00000273219.1	antisense	RP11-644N4.1	OTTHUMG00000186345.1	lncRNA	1	3.28947
chr7	138645671	138646448	777	-	ENSG00000234658.1	processed_pseudogene	AC013429.4	OTTHUMG00000155874.3	pseudogene	1	1.287
chr7	139359032	139359566	534	-	ENSG00000273391.1	antisense	RP11-634H22.1	OTTHUMG00000186346.1	lncRNA	1	1.87266
chr7	143379692	143380495	803	-	ENSG00000232533.1	antisense	AC093673.5	OTTHUMG00000152694.1	lncRNA	2	2.49066
chr7	151028781	151029754	973	-	ENSG00000243433.1	antisense	RP11-148K1.10	OTTHUMG00000158684.1	lncRNA	1	1.02775
chr8	4787332	4788584	1252	+	ENSG00000254244.1	processed_pseudogene	PAICSP4	OTTHUMG00000163651.1	pseudogene	1	0.798722
chr8	6898878	6899468	590	-	ENSG00000250752.2	processed_pseudogene	RPL23AP96	OTTHUMG00000160431.2	pseudogene	1	1.69492
chr8	6928608	6930473	1865	+	ENSG00000254625.1	antisense	GS1-24F4.3	OTTHUMG00000165211.1	lncRNA	2	1.07239
chr8	11553224	11554207	983	-	ENSG00000254774.1	antisense	RP11-148O21.3	OTTHUMG00000165415.1	lncRNA	1	1.01729
chr8	18387108	18387777	669	-	ENSG00000271654.1	processed_pseudogene	RP11-685B14.3	OTTHUMG00000184844.1	pseudogene	1	1.49477
chr8	30082758	30083467	709	+	ENSG00000272256.1	antisense	RP11-489E7.4	OTTHUMG00000185429.1	lncRNA	1	1.41044
chr8	31497423	31498612	1189	+	ENSG00000253275.1	lincRNA	RP11-566H8.1	OTTHUMG00000163914.1	lincRNA	1	0.841043
chr8	38400536	38401683	1147	-	ENSG00000254981.1	antisense	RP11-350N15.3	OTTHUMG00000165098.1	lncRNA	1	0.87184
chr8	41511240	41512521	1281	+	ENSG00000253943.1	processed_pseudogene	KRT18P37	OTTHUMG00000164078.1	pseudogene	1	0.78064
chr8	41828165	41829934	1769	-	ENSG00000260588.1	lincRNA	RP11-930P14.2	OTTHUMG00000164085.2	lincRNA	2	1.13058
chr8	42151772	42152763	991	-	ENSG00000261449.1	antisense	RP11-589C21.5	OTTHUMG00000173375.1	lncRNA	1	1.00908
chr8	43276270	43276823	553	-	ENSG00000234713.3	processed_pseudogene	RP11-726G23.10	OTTHUMG00000164109.1	pseudogene	2	3.61664
chr8	47194002	47194347	345	-	ENSG00000253502.1	processed_pseudogene	ATP6V1G1P2	OTTHUMG00000164147.1	pseudogene	1	2.89855
chr8	47511034	47512141	1107	-	ENSG00000253330.1	processed_pseudogene	RP11-697N18.3	OTTHUMG00000164177.1	pseudogene	1	0.903342
chr8	56074592	56075274	682	+	ENSG00000253603.1	antisense	CTA-397H3.3	OTTHUMG00000164298.1	lncRNA	1	1.46628
chr8	86481754	86483002	1248	-	ENSG00000250569.1	processed_pseudogene	NTAN1P2	OTTHUMG00000160478.1	pseudogene	1	0.801282
chr8	93646066	93647092	1026	+	ENSG00000253781.1	processed_pseudogene	ZNF317P1	OTTHUMG00000164237.1	pseudogene	1	0.974659
chr8	97788210	97788357	147	-	ENSG00000270682.1	processed_pseudogene	KB-1907C4.2	OTTHUMG00000184717.1	pseudogene	1	6.80272
chr8	104990308	104990692	384	-	ENSG00000253997.1	processed_pseudogene	RP11-200A13.3	OTTHUMG00000164815.1	pseudogene	1	2.60417
chr8	123192875	123192932	57	+	ENSG00000253410.1	transcribed_processed_pseudogene	RP11-539E17.3	OTTHUMG00000165085.1	pseudogene	1	17.5439
chr8	123924759	123925933	1174	-	ENSG00000254000.1	lincRNA	RP11-245A18.1	OTTHUMG00000164999.1	lincRNA	1	0.851789
chr8	135455865	135456952	1087	-	ENSG00000254372.1	antisense	RP11-343P9.1	OTTHUMG00000164166.1	lncRNA	1	0.919963
chr8	140636281	140638283	2002	+	ENSG00000280303.2	lincRNA	ERICD	OTTHUMG00000164249.2	lincRNA	2	0.999001
chr8	144409492	144409976	484	+	ENSG00000272115.1	antisense	GS1-393G12.14	OTTHUMG00000185629.1	lncRNA	1	2.06612
chr8	144463817	144465101	1284	+	ENSG00000254578.1	antisense	CTD-2517M22.16	OTTHUMG00000165651.1	lncRNA	1	0.778816
chr9	3647335	3648338	1003	+	ENSG00000237359.1	lincRNA	RP11-509J21.2	OTTHUMG00000019458.1	lincRNA	2	1.99402
chr9	14068932	14069417	485	+	ENSG00000213954.3	processed_pseudogene	ATP5HP3	OTTHUMG00000019568.2	pseudogene	1	2.06186
chr9	33719690	33722555	2865	+	ENSG00000227301.1	lincRNA	RP11-384P7.5	OTTHUMG00000000412.1	lincRNA	4	1.39616
chr9	34191555	34191881	326	+	ENSG00000227383.1	processed_pseudogene	RP11-571F15.2	OTTHUMG00000019811.2	pseudogene	1	3.06748
chr9	34546524	34546996	472	-	ENSG00000232983.2	processed_pseudogene	RP11-296L22.7	OTTHUMG00000000444.2	pseudogene	1	2.11864
chr9	35096378	35098141	1763	+	ENSG00000234181.1	antisense	RP11-182N22.8	OTTHUMG00000019849.1	lncRNA	3	1.70164
chr9	35646270	35647099	829	+	ENSG00000227933.1	antisense	RP11-331F9.4	OTTHUMG00000019866.1	lncRNA	1	1.20627
chr9	35657751	35658018	267	-	ENSG00000269900.3	lincRNA	RMRP	OTTHUMG00000184014.1	lincRNA	1	3.74532
chr9	35756712	35757940	1228	-	ENSG00000228843.2	antisense	RP11-112J3.15	OTTHUMG00000019883.2	lncRNA	1	0.814332
chr9	69428248	69428721	473	-	ENSG00000243888.1	3prime_overlapping_ncrna	RP11-548B3.3	OTTHUMG00000019980.1	lncRNA	1	2.11416
chr9	69672749	69673713	964	+	ENSG00000261447.1	lincRNA	RP11-109D9.4	OTTHUMG00000175664.1	lincRNA	1	1.03734
chr9	76419934	76420631	697	+	ENSG00000233814.1	processed_pseudogene	RP11-66C24.1	OTTHUMG00000020042.1	pseudogene	1	1.43472
chr9	77176756	77177994	1238	-	ENSG00000232998.1	antisense	VPS13A-AS1	OTTHUMG00000020054.1	lncRNA	1	0.807754
chr9	86414282	86414570	288	+	ENSG00000235819.1	lincRNA	RP11-359J6.1	OTTHUMG00000020138.1	lincRNA	1	3.47222
chr9	91426238	91427144	906	+	ENSG00000233081.1	lincRNA	RP11-440G5.2	OTTHUMG00000020208.1	lincRNA	1	1.10375
chr9	98234709	98235567	858	+	ENSG00000224001.2	processed_pseudogene	RP11-270F18.2	OTTHUMG00000020342.2	pseudogene	1	1.1655
chr9	134168769	134169340	571	+	ENSG00000273473.1	lincRNA	LL09NC01-139C3.1	OTTHUMG00000186052.1	lincRNA	1	1.75131
chr9	136122521	136124363	1842	+	ENSG00000275329.1	lincRNA	RP11-83N9.6	OTTHUMG00000187245.1	lincRNA	2	1.08578
chr9	136779939	136780218	279	+	ENSG00000224662.2	processed_pseudogene	ATP6V1G1P3	OTTHUMG00000020944.2	pseudogene	2	7.16846
chr9	137063535	137064581	1046	+	ENSG00000231864.2	antisense	RP11-229P13.23	OTTHUMG00000020975.2	lncRNA	2	1.91205
chr9	137286112	137287236	1124	+	ENSG00000270259.2	processed_pseudogene	RP13-122B23.9	OTTHUMG00000184711.2	pseudogene	1	0.88968
chr10	8052242	8053449	1207	-	ENSG00000243350.1	lincRNA	RP11-379F12.3	OTTHUMG00000017641.1	lincRNA	1	0.8285
chr10	8513687	8515106	1419	-	ENSG00000213771.3	processed_pseudogene	KRT8P37	OTTHUMG00000017647.1	pseudogene	1	0.704722
chr10	13104574	13104793	219	-	ENSG00000235763.1	processed_pseudogene	SNRPGP5	OTTHUMG00000017684.1	pseudogene	1	4.56621
chr10	32346499	32347179	680	+	ENSG00000233825.1	antisense	RP11-135A24.4	OTTHUMG00000017924.1	lncRNA	1	1.47059
chr10	48745545	48746128	583	-	ENSG00000228754.1	processed_pseudogene	RP11-534L6.3	OTTHUMG00000018177.1	pseudogene	1	1.71527
chr10	72274915	72275980	1065	-	ENSG00000269926.1	antisense	RP11-442H21.2	OTTHUMG00000018435.2	lncRNA	2	1.87793
chr10	88727485	88728914	1429	+	ENSG00000226358.1	processed_pseudogene	KRT8P38	OTTHUMG00000018697.1	pseudogene	1	0.69979
chr10	91908131	91909348	1217	+	ENSG00000272817.1	antisense	RP11-402D21.2	OTTHUMG00000186460.1	lncRNA	1	0.821693
chr10	93071972	93073466	1494	+	ENSG00000279607.1	lincRNA	RP11-348J12.5	OTTHUMG00000189113.1	lincRNA	1	0.669344
chr10	95183653	95184217	564	+	ENSG00000225533.1	processed_pseudogene	PAWRP1	OTTHUMG00000018807.1	pseudogene	1	1.77305
chr10	101060029	101061005	976	-	ENSG00000273162.1	lincRNA	RP11-108L7.15	OTTHUMG00000186479.1	lincRNA	1	1.02459
chr10	124489823	124490578	755	-	ENSG00000229455.2	processed_pseudogene	RPS10P18	OTTHUMG00000019212.3	pseudogene	2	2.64901
chr10	133246478	133247891	1413	-	ENSG00000166917.8	antisense	MIR202HG	OTTHUMG00000170605.1	lncRNA	1	0.707714
chr11	1309769	1310707	938	+	ENSG00000255153.1	antisense	TOLLIP-AS1	OTTHUMG00000166230.1	lncRNA	1	1.0661
chr11	3854318	3855509	1191	-	ENSG00000228661.1	antisense	AC090587.5	OTTHUMG00000012285.1	lncRNA	1	0.839631
chr11	3854612	3855399	787	+	ENSG00000229368.1	sense_overlapping	AC090587.4	OTTHUMG00000012284.1	lncRNA	1	1.27065
chr11	5291761	5292380	619	-	ENSG00000229093.1	unprocessed_pseudogene	OR51AB1P	OTTHUMG00000066677.1	pseudogene	1	1.61551
chr11	6297189	6298606	1417	-	ENSG00000270435.1	processed_pseudogene	RP11-304C12.4	OTTHUMG00000184841.1	pseudogene	2	1.41143
chr11	6603642	6604420	778	-	ENSG00000254400.1	antisense	RP11-732A19.8	OTTHUMG00000166620.1	lncRNA	1	1.28535
chr11	14907518	14907986	468	+	ENSG00000253179.1	unprocessed_pseudogene	CALCP	OTTHUMG00000164573.23	pseudogene	1	2.13675
chr11	45771432	45772358	926	+	ENSG00000205106.4	lincRNA	DKFZp779M0652	OTTHUMG00000166518.1	lincRNA	3	3.23974
chr11	46238382	46239267	885	+	ENSG00000254639.1	lincRNA	CTD-2589M5.5	OTTHUMG00000166909.1	lincRNA	1	1.12994
chr11	47270657	47272110	1453	-	ENSG00000256746.5	antisense	RP11-17G12.3	OTTHUMG00000167884.1	lncRNA	1	0.688231
chr11	55714996	55715632	636	+	ENSG00000254457.1	unprocessed_pseudogene	OR5D2P	OTTHUMG00000166804.1	pseudogene	1	1.57233
chr11	59142121	59142610	489	-	ENSG00000255381.1	processed_pseudogene	AP001258.5	OTTHUMG00000167436.1	pseudogene	1	2.04499
chr11	59263389	59263802	413	-	ENSG00000254799.1	processed_pseudogene	SLC25A47P1	OTTHUMG00000167415.1	pseudogene	1	2.42131
chr11	59753015	59754975	1960	-	ENSG00000254477.1	antisense	AP000640.10	OTTHUMG00000167407.1	lncRNA	2	1.02041
chr11	62786023	62786785	762	-	ENSG00000269176.2	antisense	RP11-727F15.12	OTTHUMG00000183002.2	lncRNA	1	1.31234
chr11	64245964	64248217	2253	+	ENSG00000256940.1	antisense	RP11-783K16.5	OTTHUMG00000167815.1	lncRNA	2	0.887705
chr11	64246939	64249494	2555	-	ENSG00000257086.1	lincRNA	RP11-783K16.13	OTTHUMG00000167847.2	lincRNA	2	0.782779
chr11	64449074	64451657	2583	+	ENSG00000181908.5	lincRNA	AP003774.4	OTTHUMG00000046124.3	lincRNA	2	0.774293
chr11	64778954	64779405	451	+	ENSG00000269038.1	lincRNA	AP001462.6	OTTHUMG00000066836.2	lincRNA	1	2.21729
chr11	66067277	66069619	2342	-	ENSG00000255038.1	antisense	RP11-1167A19.2	OTTHUMG00000166666.1	lncRNA	3	1.28096
chr11	66264777	66265666	889	-	ENSG00000254855.1	antisense	RP11-867G23.1	OTTHUMG00000166905.1	lncRNA	1	1.12486
chr11	67374416	67374932	516	+	ENSG00000275484.1	lincRNA	CTC-1337H24.4	OTTHUMG00000188153.1	lincRNA	1	1.93798
chr11	67605521	67606642	1121	+	ENSG00000255119.1	antisense	RP11-655M14.12	OTTHUMG00000167300.1	lncRNA	1	0.892061
chr11	69000765	69002048	1283	-	ENSG00000261625.1	sense_overlapping	RP11-554A11.4	OTTHUMG00000172938.1	lncRNA	1	0.779423
chr11	69909184	69910994	1810	-	ENSG00000260348.1	lincRNA	RP11-643C9.1	OTTHUMG00000175910.1	lincRNA	3	1.65746
chr11	73760563	73761070	507	+	ENSG00000256034.1	antisense	RP11-707G14.1	OTTHUMG00000168031.1	lncRNA	1	1.97239
chr11	89498748	89499198	450	-	ENSG00000255295.1	processed_pseudogene	RP11-745I13.1	OTTHUMG00000167299.1	pseudogene	1	2.22222
chr11	102306112	102306271	159	+	ENSG00000270868.1	processed_pseudogene	RP11-864G5.7	OTTHUMG00000184750.1	pseudogene	1	6.28931
chr11	104873264	104873417	153	+	ENSG00000254569.1	unprocessed_pseudogene	RP11-693N9.1	OTTHUMG00000165999.1	pseudogene	1	6.53595
chr11	118791254	118793137	1883	+	ENSG00000278376.1	lincRNA	RP11-158I9.8	OTTHUMG00000188156.1	lincRNA	2	1.06213
chr11	118994824	118998004	3180	-	ENSG00000255121.2	lincRNA	RP11-110I1.12	OTTHUMG00000166415.2	lincRNA	3	0.943396
chr11	119044188	119045493	1305	+	ENSG00000255114.1	antisense	RP11-110I1.6	OTTHUMG00000166353.1	lncRNA	1	0.766284
chr11	119065263	119065677	414	-	ENSG00000271751.1	lincRNA	RP11-110I1.14	OTTHUMG00000185714.1	lincRNA	2	4.83092
chr11	119602875	119604306	1431	-	ENSG00000230716.3	processed_pseudogene	KRT8P7	OTTHUMG00000166175.1	pseudogene	2	1.39762
chr11	120168977	120171679	2702	+	ENSG00000176984.6	antisense	AP000679.2	OTTHUMG00000166138.3	lncRNA	2	0.740192
chr11	126292922	126294254	1332	-	ENSG00000254905.1	antisense	RP11-712L6.7	OTTHUMG00000166619.1	lncRNA	1	0.750751
chr12	590633	591269	636	+	ENSG00000255825.1	antisense	RP5-1154L15.1	OTTHUMG00000168058.1	lncRNA	2	3.14465
chr12	6537794	6538370	576	-	ENSG00000269968.1	antisense	RP5-940J5.9	OTTHUMG00000183895.1	lncRNA	2	3.47222
chr12	6943508	6944604	1096	-	ENSG00000272173.1	antisense	U47924.31	OTTHUMG00000185702.1	lncRNA	1	0.912409
chr12	6964949	6965382	433	+	ENSG00000271969.1	antisense	U47924.29	OTTHUMG00000185704.1	lncRNA	1	2.30947
chr12	7860437	7860764	327	+	ENSG00000241828.2	processed_pseudogene	RP11-277J24.1	OTTHUMG00000157430.2	pseudogene	1	3.0581
chr12	9135084	9135591	507	+	ENSG00000256720.1	processed_pseudogene	BTG1P1	OTTHUMG00000168328.1	pseudogene	1	1.97239
chr12	11512723	11514136	1413	+	ENSG00000270863.1	processed_pseudogene	DDX55P1	OTTHUMG00000184770.1	pseudogene	1	0.707714
chr12	25385670	25386241	571	-	ENSG00000278743.1	lincRNA	RP11-707G18.1	OTTHUMG00000187136.1	lincRNA	1	1.75131
chr12	31251992	31252597	605	-	ENSG00000243517.1	processed_pseudogene	RP11-627K11.1	OTTHUMG00000157517.1	pseudogene	2	3.30579
chr12	47817451	47817966	515	-	ENSG00000274737.1	sense_intronic	RP5-1057I20.6	OTTHUMG00000187387.2	lncRNA	1	1.94175
chr12	48442030	48442947	917	-	ENSG00000226413.2	unprocessed_pseudogene	OR8T1P	OTTHUMG00000154311.2	pseudogene	1	1.09051
chr12	48995150	48996334	1184	+	ENSG00000258283.1	antisense	RP11-386G11.3	OTTHUMG00000170404.1	lncRNA	1	0.844595
chr12	53159586	53161000	1414	+	ENSG00000257808.1	lincRNA	RP11-1136G11.8	OTTHUMG00000170026.1	lincRNA	1	0.707214
chr12	55646195	55646663	468	-	ENSG00000272837.1	unprocessed_pseudogene	OR10AE3P	OTTHUMG00000185941.1	pseudogene	2	4.2735
chr12	56118968	56119939	971	-	ENSG00000258345.1	antisense	RP11-603J24.6	OTTHUMG00000170141.1	lncRNA	1	1.02987
chr12	56376818	56377331	513	-	ENSG00000274823.1	processed_pseudogene	RP11-348M3.6	OTTHUMG00000188037.1	pseudogene	1	1.94932
chr12	57803838	57804415	577	+	ENSG00000270039.1	lincRNA	RP11-571M6.17	OTTHUMG00000183984.1	lincRNA	1	1.7331
chr12	62021570	62022174	604	-	ENSG00000213363.4	processed_pseudogene	RPS3P6	OTTHUMG00000157595.1	pseudogene	1	1.65563
chr12	68001394	68001548	154	-	ENSG00000244432.2	processed_pseudogene	RPL39P28	OTTHUMG00000157610.2	pseudogene	1	6.49351
chr12	68035767	68036853	1086	+	ENSG00000236946.2	processed_pseudogene	HNRNPA1P70	OTTHUMG00000169109.1	pseudogene	1	0.92081
chr12	69284397	69285485	1088	+	ENSG00000257818.1	processed_pseudogene	C1GALT1P1	OTTHUMG00000169341.1	pseudogene	1	0.919118
chr12	75333798	75334486	688	-	ENSG00000273987.1	sense_intronic	RP11-585P4.6	OTTHUMG00000187280.1	lncRNA	1	1.45349
chr12	94140077	94141337	1260	+	ENSG00000257360.1	processed_pseudogene	RP11-74K11.1	OTTHUMG00000170234.1	pseudogene	1	0.793651
chr12	101773114	101773755	641	-	ENSG00000258230.2	transcribed_processed_pseudogene	RP11-511H9.3	OTTHUMG00000170445.2	pseudogene	1	1.56006
chr12	104976749	104978027	1278	-	ENSG00000257758.1	processed_pseudogene	KRT18P20	OTTHUMG00000169821.1	pseudogene	2	1.56495
chr12	107910403	107912620	2217	-	ENSG00000257129.1	transcribed_processed_pseudogene	RP11-554D14.1	OTTHUMG00000169712.1	pseudogene	2	0.90212
chr12	118375350	118376275	925	-	ENSG00000270482.1	lincRNA	RP11-131L12.2	OTTHUMG00000185168.1	lincRNA	1	1.08108
chr12	126874821	126876232	1411	+	ENSG00000256286.1	lincRNA	RP11-983C2.3	OTTHUMG00000168454.1	lincRNA	1	0.708717
chr12	127145072	127146532	1460	-	ENSG00000256001.1	lincRNA	RP11-575F12.2	OTTHUMG00000168461.1	lincRNA	1	0.684932
chr12	130047132	130048376	1244	+	ENSG00000256298.1	lincRNA	RP11-474D1.1	OTTHUMG00000168374.1	lincRNA	1	0.803859
chr13	19563589	19564900	1311	-	ENSG00000238132.2	processed_pseudogene	CASC4P1	OTTHUMG00000016496.2	pseudogene	1	0.762777
chr13	19587118	19588350	1232	+	ENSG00000225316.1	lincRNA	LINC00350	OTTHUMG00000016497.1	lincRNA	1	0.811688
chr13	19818121	19818619	498	-	ENSG00000233469.1	processed_pseudogene	ST6GALNAC4P1	OTTHUMG00000016501.1	pseudogene	1	2.00803
chr13	19863858	19865048	1190	+	ENSG00000275964.1	lincRNA	RP11-61K9.3	OTTHUMG00000187050.1	lincRNA	1	0.840336
chr13	45340039	45341183	1144	+	ENSG00000273149.1	antisense	RP11-290D2.6	OTTHUMG00000186000.1	lncRNA	1	0.874126
chr13	95744726	95745765	1039	+	ENSG00000276809.1	sense_intronic	RP11-10E18.7	OTTHUMG00000188627.1	lncRNA	1	0.962464
chr14	19796345	19797260	915	+	ENSG00000258564.1	unprocessed_pseudogene	OR4N1P	OTTHUMG00000154362.2	pseudogene	2	2.18579
chr14	20305730	20306811	1081	+	ENSG00000258459.1	antisense	CTD-2292M16.7	OTTHUMG00000170853.1	lncRNA	1	0.925069
chr14	22556311	22557062	751	-	ENSG00000259054.1	lincRNA	AE000662.93	OTTHUMG00000170967.2	lincRNA	2	2.66312
chr14	22556640	22559037	2397	+	ENSG00000259003.1	lincRNA	AE000662.92	OTTHUMG00000170968.2	lincRNA	3	1.25156
chr14	25431193	25432234	1041	-	ENSG00000257976.1	processed_pseudogene	RP11-388G3.1	OTTHUMG00000170317.1	pseudogene	1	0.960615
chr14	48398310	48399375	1065	+	ENSG00000258750.2	processed_pseudogene	RP11-2G1.2	OTTHUMG00000170799.2	pseudogene	1	0.938967
chr14	70906657	70907111	454	-	ENSG00000274818.1	lincRNA	RP1-292L20.3	OTTHUMG00000186911.2	lincRNA	1	2.20264
chr14	73571159	73571667	508	-	ENSG00000258524.1	processed_pseudogene	NT5CP1	OTTHUMG00000171605.1	pseudogene	1	1.9685
chr14	93138066	93138465	399	+	ENSG00000258595.2	processed_pseudogene	RP11-371E8.2	OTTHUMG00000171264.2	pseudogene	1	2.50627
chr14	101843394	101844122	728	-	ENSG00000259161.2	processed_pseudogene	CTD-2017C7.3	OTTHUMG00000171643.2	pseudogene	1	1.37363
chr14	106286811	106287657	846	-	ENSG00000238275.2	processed_pseudogene	HOMER2P2	OTTHUMG00000152092.2	pseudogene	2	2.36407
chr14	106436415	106436555	140	-	ENSG00000228757.1	unprocessed_pseudogene	AB019438.66	OTTHUMG00000152076.2	pseudogene	1	7.14286
chr14	106460092	106461055	963	-	ENSG00000228966.2	processed_pseudogene	HOMER2P1	OTTHUMG00000152103.3	pseudogene	1	1.03842
chr15	34489002	34490571	1569	-	ENSG00000259917.1	unprocessed_pseudogene	HNRNPLP2	OTTHUMG00000173388.1	pseudogene	2	1.2747
chr15	42800968	42802405	1437	-	ENSG00000260799.1	processed_pseudogene	KRT8P50	OTTHUMG00000176056.1	pseudogene	1	0.695894
chr15	45198517	45199139	622	-	ENSG00000259932.1	sense_intronic	CTD-2651B20.7	OTTHUMG00000172833.1	lncRNA	1	1.60772
chr15	45215547	45215943	396	+	ENSG00000259338.1	processed_pseudogene	CTD-2651B20.2	OTTHUMG00000172001.1	pseudogene	1	2.52525
chr15	48810701	48811909	1208	+	ENSG00000259700.3	processed_transcript	RP11-485O10.3	OTTHUMG00000172160.1	processed_transcript	1	0.827815
chr15	49177610	49178741	1131	-	ENSG00000259545.2	processed_pseudogene	RP11-325E5.4	OTTHUMG00000172327.2	pseudogene	1	0.884173
chr15	56248787	56249127	340	+	ENSG00000275417.1	sense_intronic	RP11-844G16.3	OTTHUMG00000186900.1	lncRNA	1	2.94118
chr15	65083042	65083663	621	-	ENSG00000278737.1	lincRNA	RP11-325L12.7	OTTHUMG00000186925.1	lincRNA	1	1.61031
chr15	74303005	74304343	1338	+	ENSG00000261384.1	sense_intronic	RP11-60L3.2	OTTHUMG00000172634.1	lncRNA	1	0.747384
chr15	74374678	74375511	833	+	ENSG00000274937.1	lincRNA	CTD-2311M21.4	OTTHUMG00000186953.1	lincRNA	1	1.20048
chr15	75368155	75369584	1429	+	ENSG00000260274.1	lincRNA	RP11-817O13.8	OTTHUMG00000173067.1	lincRNA	1	0.69979
chr15	75452964	75453947	983	-	ENSG00000276744.1	sense_intronic	CTD-2562G15.3	OTTHUMG00000186962.1	lncRNA	2	2.03459
chr15	75639760	75640976	1216	+	ENSG00000275454.1	antisense	CTD-2026K11.4	OTTHUMG00000186970.1	lncRNA	1	0.822368
chr15	86139838	86140240	402	-	ENSG00000261077.1	processed_pseudogene	RP11-553E24.1	OTTHUMG00000172871.1	pseudogene	1	2.48756
chr15	90932586	90935130	2544	-	ENSG00000224441.1	antisense	AC068831.3	OTTHUMG00000141259.1	lncRNA	3	1.17925
chr15	94168349	94168751	402	+	ENSG00000258570.1	processed_pseudogene	RP11-452K20.1	OTTHUMG00000171812.1	pseudogene	1	2.48756
chr16	525155	527407	2252	-	ENSG00000277142.1	lincRNA	LINC00235	OTTHUMG00000186631.1	lincRNA	2	0.888099
chr16	1286351	1288837	2486	-	ENSG00000260284.1	unprocessed_pseudogene	TPSP2	OTTHUMG00000172998.1	pseudogene	2	0.804505
chr16	3263743	3267567	3824	+	ENSG00000281005.1	lincRNA	LINC00921	OTTHUMG00000189522.1	lincRNA	3	0.784519
chr16	4433202	4433387	185	-	ENSG00000275515.1	processed_pseudogene	RP11-295D4.7	OTTHUMG00000187870.2	pseudogene	1	5.40541
chr16	11797468	11798275	807	+	ENSG00000277369.1	lincRNA	RP11-486I11.2	OTTHUMG00000186782.1	lincRNA	1	1.23916
chr16	21950218	21951708	1490	-	ENSG00000274460.1	processed_transcript	CTD-2649C14.2	OTTHUMG00000186800.1	processed_transcript	1	0.671141
chr16	25106569	25107102	533	-	ENSG00000275494.1	sense_intronic	RP11-266L9.8	OTTHUMG00000186826.1	lncRNA	2	3.75235
chr16	28553709	28554140	431	-	ENSG00000275441.1	antisense	RP11-666O2.2	OTTHUMG00000186839.1	lncRNA	1	2.32019
chr16	28862166	28863340	1174	-	ENSG00000261766.1	antisense	RP11-22P6.2	OTTHUMG00000176591.1	lncRNA	1	0.851789
chr16	29806496	29807732	1236	-	ENSG00000259952.1	antisense	AC009133.15	OTTHUMG00000177140.1	lncRNA	1	0.809061
chr16	30064306	30064825	519	-	ENSG00000274904.1	antisense	CTD-2515O10.5	OTTHUMG00000186864.1	lncRNA	2	3.85356
chr16	30615256	30615679	423	-	ENSG00000260678.1	transcribed_processed_pseudogene	RP11-146F11.4	OTTHUMG00000176952.1	pseudogene	1	2.36407
chr16	30956872	30957199	327	-	ENSG00000275263.1	lincRNA	RP11-1072A3.4	OTTHUMG00000186886.1	lincRNA	1	3.0581
chr16	31699676	31700465	789	-	ENSG00000260568.1	lincRNA	CTD-2358C21.3	OTTHUMG00000176629.1	lincRNA	1	1.26743
chr16	48334471	48334854	383	-	ENSG00000240793.1	processed_pseudogene	UBA52P8	OTTHUMG00000158140.1	pseudogene	2	5.22193
chr16	50806668	50807629	961	+	ENSG00000261703.1	lincRNA	RP11-327F22.5	OTTHUMG00000173406.1	lincRNA	1	1.04058
chr16	56643705	56644786	1081	+	ENSG00000205361.8	transcribed_unprocessed_pseudogene	MT1DP	OTTHUMG00000158354.2	pseudogene	1	0.925069
chr16	69709874	69710583	709	+	ENSG00000261602.1	antisense	CTD-2033A16.1	OTTHUMG00000176835.1	lncRNA	2	2.82087
chr16	71723180	71724230	1050	+	ENSG00000261513.1	antisense	RP11-432I5.8	OTTHUMG00000176869.1	lncRNA	1	0.952381
chr16	72728616	72729894	1278	+	ENSG00000261764.1	transcribed_processed_pseudogene	KRT18P18	OTTHUMG00000173050.1	pseudogene	1	0.782473
chr16	86158206	86158798	592	-	ENSG00000268078.1	lincRNA	RP11-805I24.4	OTTHUMG00000183861.1	lincRNA	1	1.68919
chr16	88696501	88698610	2109	+	ENSG00000259813.1	antisense	RP5-1142A6.5	OTTHUMG00000173416.1	lncRNA	2	0.948317
chr16	88742767	88745748	2981	+	ENSG00000182376.2	antisense	RP5-1142A6.8	OTTHUMG00000173435.1	lncRNA	2	0.670916
chr16	89166383	89169147	2764	+	ENSG00000205015.1	lincRNA	RP11-46C24.3	OTTHUMG00000175525.1	lincRNA	2	0.723589
chr17	4731756	4732371	615	-	ENSG00000261898.2	antisense	RP11-314A20.5	OTTHUMG00000177897.2	lncRNA	1	1.62602
chr17	4986466	4987324	858	+	ENSG00000262678.1	antisense	RP5-1050D4.4	OTTHUMG00000177765.1	lncRNA	1	1.1655
chr17	4987706	4988446	740	+	ENSG00000262227.1	antisense	RP5-1050D4.5	OTTHUMG00000177767.1	lncRNA	1	1.35135
chr17	5019214	5020093	879	-	ENSG00000227495.1	antisense	AC109333.10	OTTHUMG00000132924.2	lncRNA	1	1.13766
chr17	7282947	7284071	1124	-	ENSG00000263342.1	antisense	RP1-4G17.2	OTTHUMG00000177991.1	lncRNA	1	0.88968
chr17	8220642	8224043	3401	-	ENSG00000178977.3	lincRNA	LINC00324	OTTHUMG00000132866.3	lincRNA	3	0.882094
chr17	16427474	16428719	1245	+	ENSG00000239203.1	processed_transcript	AC093484.4	OTTHUMG00000058991.1	processed_transcript	1	0.803213
chr17	20008051	20009234	1183	-	ENSG00000261033.1	antisense	RP11-209D14.2	OTTHUMG00000175977.2	lncRNA	1	0.845309
chr17	20999747	21000323	576	+	ENSG00000263986.1	antisense	RP11-746M1.1	OTTHUMG00000178940.1	lncRNA	2	3.47222
chr17	22693325	22694831	1506	-	ENSG00000264431.1	processed_pseudogene	RP11-285M22.2	OTTHUMG00000179097.2	pseudogene	1	0.664011
chr17	28247444	28248289	845	+	ENSG00000265060.1	transcribed_unprocessed_pseudogene	PPY2P	OTTHUMG00000179302.1	pseudogene	1	1.18343
chr17	28416922	28417492	570	+	ENSG00000265541.1	unprocessed_pseudogene	H3F3BP2	OTTHUMG00000179306.1	pseudogene	1	1.75439
chr17	28749731	28750079	348	-	ENSG00000265840.1	antisense	AC010761.10	OTTHUMG00000179493.1	lncRNA	1	2.87356
chr17	28848860	28849592	732	+	ENSG00000264138.1	unprocessed_pseudogene	RP11-20B24.3	OTTHUMG00000179496.1	pseudogene	2	2.73224
chr17	28861072	28861966	894	-	ENSG00000264066.4	lincRNA	RP11-20B24.2	OTTHUMG00000179497.3	lincRNA	2	2.23714
chr17	29591703	29592241	538	-	ENSG00000264647.1	antisense	RP11-68I3.7	OTTHUMG00000179725.1	lncRNA	2	3.71747
chr17	29639627	29640825	1198	+	ENSG00000263370.1	antisense	RP11-68I3.5	OTTHUMG00000179727.1	lncRNA	1	0.834725
chr17	32111562	32112590	1028	-	ENSG00000265574.1	processed_pseudogene	WDR45BP1	OTTHUMG00000179563.1	pseudogene	2	1.94553
chr17	32876759	32878637	1878	+	ENSG00000226377.1	antisense	AC084809.2	OTTHUMG00000132777.1	lncRNA	2	1.06496
chr17	34080882	34082224	1342	-	ENSG00000263485.1	sense_intronic	CTC-304I17.4	OTTHUMG00000179673.1	lncRNA	1	0.745156
chr17	39835037	39836080	1043	-	ENSG00000264663.1	processed_pseudogene	KRT8P34	OTTHUMG00000179518.1	pseudogene	1	0.958773
chr17	42679963	42682020	2057	+	ENSG00000267042.1	antisense	CTD-3193K9.4	OTTHUMG00000180642.1	lncRNA	3	1.45843
chr17	43938363	43938959	596	+	ENSG00000261514.1	lincRNA	RP11-527L4.2	OTTHUMG00000176999.1	lincRNA	1	1.67785
chr17	44328613	44331462	2849	+	ENSG00000267211.1	lincRNA	RP5-1067M6.3	OTTHUMG00000181815.1	lincRNA	3	1.053
chr17	47946802	47948275	1473	-	ENSG00000264019.1	antisense	RP11-6N17.6	OTTHUMG00000178296.1	lncRNA	1	0.678887
chr17	50094065	50094647	582	+	ENSG00000276851.1	lincRNA	RP5-875H18.9	OTTHUMG00000186661.1	lincRNA	1	1.71821
chr17	50396438	50397888	1450	+	ENSG00000253102.1	antisense	RP1-117B12.4	OTTHUMG00000162080.3	lncRNA	2	1.37931
chr17	50563203	50563783	580	-	ENSG00000250976.1	antisense	RP11-94C24.11	OTTHUMG00000162216.1	lncRNA	1	1.72414
chr17	50693448	50695449	2001	+	ENSG00000262967.1	antisense	RP11-294J22.6	OTTHUMG00000177508.1	lncRNA	2	0.9995
chr17	54754165	54754649	484	-	ENSG00000263125.1	processed_pseudogene	ARL2BPP8	OTTHUMG00000177815.2	pseudogene	1	2.06612
chr17	56939932	56941275	1343	+	ENSG00000262298.1	antisense	RP5-1107A17.3	OTTHUMG00000178127.1	lncRNA	1	0.744602
chr17	60315834	60316215	381	+	ENSG00000271626.1	processed_pseudogene	RP11-3K24.2	OTTHUMG00000184886.1	pseudogene	1	2.62467
chr17	67276118	67276351	233	-	ENSG00000264093.1	processed_pseudogene	RP11-401F2.2	OTTHUMG00000179557.1	pseudogene	1	4.29185
chr17	75271369	75273895	2526	+	ENSG00000263843.1	antisense	RP11-649A18.12	OTTHUMG00000179606.1	lncRNA	2	0.791766
chr17	75394123	75394963	840	+	ENSG00000265342.1	antisense	RP11-16C1.1	OTTHUMG00000179610.1	lncRNA	1	1.19048
chr17	81927829	81930753	2924	+	ENSG00000265688.1	antisense	MAFG-AS1	OTTHUMG00000178435.1	lncRNA	2	0.683995
chr17	82153430	82154815	1385	+	ENSG00000265678.1	antisense	RP11-1376P16.2	OTTHUMG00000178560.1	lncRNA	2	1.44404
chr17	82244770	82245591	821	+	ENSG00000275888.1	antisense	RP13-516M14.10	OTTHUMG00000188129.1	lncRNA	1	1.21803
chr18	832238	832469	231	+	ENSG00000266575.1	processed_pseudogene	BOLA2P1	OTTHUMG00000178360.1	pseudogene	2	8.65801
chr18	3246401	3247086	685	-	ENSG00000272688.1	lincRNA	RP13-270P17.3	OTTHUMG00000186210.1	lincRNA	2	2.91971
chr18	3770017	3771430	1413	-	ENSG00000266513.1	sense_intronic	RP11-874J12.3	OTTHUMG00000178332.1	lncRNA	1	0.707714
chr18	6728821	6729862	1041	-	ENSG00000266441.1	antisense	RP11-91I8.3	OTTHUMG00000178470.1	lncRNA	1	0.960615
chr18	12067173	12068417	1244	-	ENSG00000267533.1	processed_pseudogene	RP11-815J4.7	OTTHUMG00000180682.1	pseudogene	1	0.803859
chr18	12091674	12093141	1467	-	ENSG00000267478.1	processed_pseudogene	RP11-815J4.5	OTTHUMG00000180684.1	pseudogene	2	1.36333
chr18	12246589	12247055	466	+	ENSG00000267663.1	processed_pseudogene	RP11-64C12.9	OTTHUMG00000180721.1	pseudogene	1	2.14592
chr18	13139780	13140489	709	-	ENSG00000267656.1	processed_pseudogene	RP11-807E13.3	OTTHUMG00000181947.1	pseudogene	2	2.82087
chr18	24402153	24402714	561	+	ENSG00000273321.1	lincRNA	RP11-621L6.3	OTTHUMG00000186241.1	lincRNA	1	1.78253
chr18	58398663	58400082	1419	-	ENSG00000267396.1	antisense	RP11-845C23.3	OTTHUMG00000179965.1	lncRNA	1	0.704722
chr18	61957273	61958014	741	-	ENSG00000267597.1	processed_pseudogene	RPIAP1	OTTHUMG00000180097.1	pseudogene	1	1.34953
chr18	76256891	76258337	1446	+	ENSG00000264212.1	lincRNA	RP11-94B19.3	OTTHUMG00000179136.1	lincRNA	1	0.691563
chr19	999796	1002757	2961	-	ENSG00000266990.1	antisense	LLNLR-284B4.2	OTTHUMG00000189099.1	lncRNA	2	0.675447
chr19	1852382	1853622	1240	+	ENSG00000267125.2	antisense	CTB-31O20.6	OTTHUMG00000179993.2	lncRNA	1	0.806452
chr19	6716386	6717742	1356	-	ENSG00000276980.1	sense_intronic	CTD-3128G10.7	OTTHUMG00000186561.1	lncRNA	2	1.47493
chr19	10259109	10260045	936	-	ENSG00000267105.1	antisense	CTD-2369P2.4	OTTHUMG00000180402.1	lncRNA	1	1.06838
chr19	12944118	12944487	369	-	ENSG00000267458.1	antisense	CTC-425F1.4	OTTHUMG00000180575.1	lncRNA	1	2.71003
chr19	13153071	13154193	1122	-	ENSG00000267598.1	antisense	CTC-250I14.6	OTTHUMG00000180791.1	lncRNA	1	0.891266
chr19	17391429	17392284	855	-	ENSG00000269720.1	lincRNA	CTD-2521M24.5	OTTHUMG00000182789.1	lincRNA	1	1.16959
chr19	36378028	36378832	804	+	ENSG00000266973.1	antisense	CTD-3162L10.3	OTTHUMG00000180676.1	lncRNA	1	1.24378
chr19	36489649	36491040	1391	+	ENSG00000267309.1	antisense	CTD-2630F21.1	OTTHUMG00000180679.1	lncRNA	1	0.718907
chr19	38361795	38362484	689	-	ENSG00000266963.1	antisense	AC005625.1	OTTHUMG00000182326.1	lncRNA	1	1.45138
chr19	39341773	39341945	172	-	ENSG00000269246.1	lincRNA	CTC-246B18.10	OTTHUMG00000183224.1	lincRNA	1	5.81395
chr19	42424384	42425071	687	-	ENSG00000268605.1	sense_intronic	CTB-50E14.4	OTTHUMG00000182816.1	lncRNA	1	1.4556
chr19	42560433	42561750	1317	-	ENSG00000230558.2	unprocessed_pseudogene	CEACAMP2	OTTHUMG00000151119.2	pseudogene	2	1.5186
chr19	45641494	45642840	1346	+	ENSG00000267757.4	processed_transcript	EML2-AS1	OTTHUMG00000182128.1	processed_transcript	2	1.48588
chr19	47607873	47608454	581	-	ENSG00000277383.1	antisense	CTD-3001H11.2	OTTHUMG00000186770.1	lncRNA	2	3.44234
chr19	47794467	47794890	423	-	ENSG00000213035.4	processed_pseudogene	RPL23AP80	OTTHUMG00000158216.2	pseudogene	1	2.36407
chr19	47794650	47794920	270	+	ENSG00000271150.1	processed_pseudogene	CTD-2571L23.9	OTTHUMG00000185249.1	pseudogene	1	3.7037
chr19	47863483	47865341	1858	-	ENSG00000259108.2	lincRNA	LINC01595	OTTHUMG00000170611.2	lincRNA	2	1.07643
chr19	49018247	49019484	1237	-	ENSG00000268655.1	lincRNA	CTB-60B18.10	OTTHUMG00000183335.1	lincRNA	1	0.808407
chr19	50486810	50487638	828	-	ENSG00000268518.1	lincRNA	CTD-2545M3.8	OTTHUMG00000183047.1	lincRNA	1	1.20773
chr19	51194118	51195540	1422	-	ENSG00000268652.1	processed_pseudogene	CTD-3187F8.7	OTTHUMG00000183126.1	pseudogene	1	0.703235
chr19	51563797	51564910	1113	-	ENSG00000268267.1	unprocessed_pseudogene	SIGLEC29P	OTTHUMG00000183514.1	pseudogene	1	0.898473
chr19	53512092	53512616	524	-	ENSG00000274892.1	unprocessed_pseudogene	CTB-167G5.7	OTTHUMG00000188032.1	pseudogene	1	1.9084
chr19	53772506	53773280	774	-	ENSG00000229000.1	processed_pseudogene	SEPT7P8	OTTHUMG00000060777.1	pseudogene	1	1.29199
chr19	54031412	54031504	92	+	ENSG00000276206.1	unprocessed_pseudogene	CTD-3093M3.1	OTTHUMG00000188518.1	pseudogene	1	10.8696
chr19	54298105	54298814	709	-	ENSG00000251431.1	unprocessed_pseudogene	AC008984.5	OTTHUMG00000065810.1	pseudogene	1	1.41044
chr19	54438665	54439544	879	-	ENSG00000267838.2	lincRNA	AC008746.12	OTTHUMG00000150514.2	lincRNA	1	1.13766
chr19	55338945	55339283	338	-	ENSG00000276831.1	lincRNA	CTD-2105E13.16	OTTHUMG00000186783.1	lincRNA	1	2.95858
chr19	55670632	55672069	1437	+	ENSG00000267096.1	sense_intronic	CTD-2537I9.13	OTTHUMG00000180910.1	lncRNA	1	0.695894
chr19	55777553	55778900	1347	+	ENSG00000255238.1	processed_pseudogene	RFPL4AP1	OTTHUMG00000165451.1	pseudogene	1	0.74239
chr20	267186	268857	1671	+	ENSG00000272874.1	lincRNA	RP5-1103G7.10	OTTHUMG00000186509.1	lincRNA	2	1.19689
chr20	2780614	2781041	427	+	ENSG00000226217.1	processed_pseudogene	RPL19P1	OTTHUMG00000031708.1	pseudogene	1	2.34192
chr20	3888239	3888868	629	-	ENSG00000229539.1	antisense	RP11-119B16.2	OTTHUMG00000031766.1	lncRNA	1	1.58983
chr20	31563166	31564076	910	+	ENSG00000235313.1	sense_intronic	HM13-IT1	OTTHUMG00000046194.1	lncRNA	1	1.0989
chr20	31721507	31723409	1902	+	ENSG00000281376.1	antisense	ABALON	OTTHUMG00000189574.1	lncRNA	2	1.05152
chr20	34833575	34834462	887	-	ENSG00000225336.2	processed_pseudogene	HMGB3P1	OTTHUMG00000032313.1	pseudogene	1	1.1274
chr20	37095785	37097178	1393	+	ENSG00000269846.1	antisense	RP4-621N11.2	OTTHUMG00000187317.1	lncRNA	1	0.717875
chr20	38962472	38962993	521	+	ENSG00000277581.1	sense_intronic	RP4-616B8.6	OTTHUMG00000186879.1	lncRNA	1	1.91939
chr20	44448777	44450092	1315	-	ENSG00000237907.1	antisense	LINC01430	OTTHUMG00000032534.2	lncRNA	1	0.760456
chr20	45229817	45230191	374	+	ENSG00000233352.1	unprocessed_pseudogene	RP1-300I2.3	OTTHUMG00000154638.1	pseudogene	2	5.34759
chr20	45892694	45893419	725	-	ENSG00000271984.1	antisense	RP3-337O18.9	OTTHUMG00000185813.1	lncRNA	1	1.37931
chr20	46681676	46682375	699	-	ENSG00000273893.1	sense_intronic	RP1-101A2.1	OTTHUMG00000186929.1	lncRNA	1	1.43062
chr20	46689659	46690289	630	+	ENSG00000271784.1	lincRNA	RP1-28H20.3	OTTHUMG00000185332.1	lincRNA	1	1.5873
chr20	59515191	59516039	848	+	ENSG00000227282.1	lincRNA	RP11-164D18.2	OTTHUMG00000137386.1	lincRNA	2	2.35849
chr20	61369879	61370855	976	+	ENSG00000276786.1	lincRNA	WI2-8325B5.1	OTTHUMG00000186968.1	lincRNA	1	1.02459
chr20	62477870	62478594	724	+	ENSG00000272050.1	lincRNA	RP13-379O24.3	OTTHUMG00000185378.1	lincRNA	1	1.38122
chr21	20388334	20388845	511	+	ENSG00000233676.2	processed_pseudogene	FDPSP6	OTTHUMG00000078059.2	pseudogene	1	1.95695
chr21	20424949	20426206	1257	-	ENSG00000234439.1	processed_pseudogene	KRT18P2	OTTHUMG00000078062.1	pseudogene	1	0.795545
chr21	29024255	29024890	635	-	ENSG00000273254.1	antisense	RP1-100J12.1	OTTHUMG00000186465.1	lncRNA	1	1.5748
chr21	33309491	33310181	690	+	ENSG00000272659.1	lincRNA	AP000295.10	OTTHUMG00000186478.2	lincRNA	1	1.44928
chr21	36168970	36170180	1210	-	ENSG00000228149.1	processed_pseudogene	RPL3P1	OTTHUMG00000086610.1	pseudogene	1	0.826446
chr21	39313935	39314962	1027	+	ENSG00000255568.3	antisense	BRWD1-AS2	OTTHUMG00000066154.5	lncRNA	1	0.97371
chr21	44802577	44804717	2140	+	ENSG00000236519.1	antisense	LINC01424	OTTHUMG00000090255.1	lncRNA	2	0.934579
chr21	46420553	46421034	481	-	ENSG00000225043.1	processed_pseudogene	RPL18AP2	OTTHUMG00000154992.1	pseudogene	2	4.158
chr22	17213516	17214155	639	+	ENSG00000203416.3	processed_pseudogene	FAM32B	OTTHUMG00000150068.2	pseudogene	2	3.12989
chr22	20110821	20111875	1054	-	ENSG00000243762.1	antisense	AC006547.8	OTTHUMG00000150489.2	lncRNA	1	0.948767
chr22	20482815	20484105	1290	-	ENSG00000236670.1	processed_pseudogene	KRT18P5	OTTHUMG00000150808.1	pseudogene	1	0.775194
chr22	20981361	20981755	394	-	ENSG00000272829.1	lincRNA	XXbac-B135H6.18	OTTHUMG00000186195.1	lincRNA	1	2.53807
chr22	22168289	22168634	345	+	ENSG00000227710.1	unprocessed_pseudogene	LL22NC03-30E12.13	OTTHUMG00000150858.1	pseudogene	1	2.89855
chr22	22370829	22371120	291	+	ENSG00000232603.1	unprocessed_pseudogene	LL22NC03-22A12.12	OTTHUMG00000151055.1	pseudogene	1	3.43643
chr22	23433564	23435071	1507	+	ENSG00000234928.1	lincRNA	AP000344.3	OTTHUMG00000150668.1	lincRNA	1	0.66357
chr22	25048967	25051966	2999	-	ENSG00000279006.1	antisense	CTA-243E7.2	OTTHUMG00000189170.1	lncRNA	2	0.666889
chr22	29608900	29609501	601	+	ENSG00000233010.1	processed_pseudogene	RPEP4	OTTHUMG00000155625.1	pseudogene	1	1.66389
chr22	31082156	31083565	1409	-	ENSG00000273387.1	antisense	RP3-412A9.16	OTTHUMG00000186126.1	lncRNA	1	0.709723
chr22	37950965	37951778	813	+	ENSG00000272582.1	antisense	RP5-1039K5.17	OTTHUMG00000186180.1	lncRNA	1	1.23001
chr22	38043230	38043920	690	+	ENSG00000273214.1	lincRNA	RP5-1039K5.18	OTTHUMG00000186181.1	lincRNA	1	1.44928
chr22	44443327	44444788	1461	+	ENSG00000232655.1	lincRNA	CTA-397C4.2	OTTHUMG00000150468.1	lincRNA	1	0.684463
chr22	44566965	44568247	1282	+	ENSG00000215333.3	processed_pseudogene	KRT18P23	OTTHUMG00000150459.1	pseudogene	1	0.780031
chrX	8783514	8784461	947	-	ENSG00000225574.1	processed_pseudogene	DRAXINP1	OTTHUMG00000021108.2	pseudogene	1	1.05597
chrX	28659065	28659469	404	-	ENSG00000226436.1	processed_pseudogene	RP1-22N22.1	OTTHUMG00000021314.1	pseudogene	1	2.47525
chrX	41275739	41276778	1039	+	ENSG00000223714.1	lincRNA	RP5-1172N10.2	OTTHUMG00000021366.1	lincRNA	1	0.962464
chrX	45632292	45633733	1441	-	ENSG00000214282.3	processed_pseudogene	KRT8P14	OTTHUMG00000021407.2	pseudogene	1	0.693963
chrX	45951762	45952333	571	-	ENSG00000224701.1	processed_pseudogene	MED28P4	OTTHUMG00000021412.1	pseudogene	1	1.75131
chrX	47204921	47205865	944	+	ENSG00000224975.1	sense_intronic	INE1	OTTHUMG00000046428.1	lncRNA	2	2.11864
chrX	49876724	49879241	2517	-	ENSG00000234390.4	lincRNA	USP27X-AS1	OTTHUMG00000024154.2	lincRNA	2	0.794597
chrX	49911620	49912362	742	-	ENSG00000220132.1	processed_pseudogene	AF238380.8	OTTHUMG00000048045.1	pseudogene	1	1.34771
chrX	50905438	50905866	428	+	ENSG00000226881.5	processed_pseudogene	H3F3AP5	OTTHUMG00000021523.1	pseudogene	2	4.6729
chrX	85851575	85851682	107	-	ENSG00000276892.1	processed_pseudogene	RP1-93L7.4	OTTHUMG00000188095.1	pseudogene	1	9.34579
chrX	103687284	103691772	4488	+	ENSG00000231154.1	antisense	MORF4L2-AS1	OTTHUMG00000022108.2	lncRNA	3	0.668449
chrX	107272582	107273656	1074	+	ENSG00000204053.6	processed_pseudogene	MYCLP1	OTTHUMG00000022162.3	pseudogene	2	1.8622
chrX	123514473	123514872	399	+	ENSG00000179101.5	processed_pseudogene	RP11-349N19.2	OTTHUMG00000022327.1	pseudogene	1	2.50627
chrX	130330857	130331069	212	+	ENSG00000225046.2	processed_pseudogene	RP1-20I3.3	OTTHUMG00000022396.2	pseudogene	1	4.71698
chrX	131803312	131803741	429	-	ENSG00000228089.1	processed_pseudogene	PNKDP1	OTTHUMG00000022418.1	pseudogene	1	2.331
chrX	153610694	153612925	2231	+	ENSG00000228616.1	lincRNA	RP11-66N11.7	OTTHUMG00000024201.1	lincRNA	2	0.896459

## Sheet: GM12878
chromosome	start	end	width	strand	gene id	gene type	gene name	havana gene	biotype	CTCF count	CTCF density
chr1	1249777	1251334	1557	-	ENSG00000260179.1	lincRNA	RP5-902P8.12	OTTHUMG00000175732.1	lincRNA	1	0.642261
chr1	3785008	3785538	530	+	ENSG00000272153.1	antisense	RP1-286D6.5	OTTHUMG00000185643.1	lncRNA	1	1.88679
chr1	6204840	6205780	940	-	ENSG00000226944.1	antisense	RP1-120G22.11	OTTHUMG00000041452.1	lncRNA	1	1.06383
chr1	6393555	6394391	836	+	ENSG00000271746.1	antisense	RP1-202O8.3	OTTHUMG00000185645.1	lncRNA	1	1.19617
chr1	7942372	7942726	354	+	ENSG00000270330.1	processed_pseudogene	RP5-892F13.2	OTTHUMG00000184257.1	pseudogene	1	2.82486
chr1	8878835	8879894	1059	+	ENSG00000230679.1	antisense	ENO1-AS1	OTTHUMG00000001779.1	lncRNA	1	0.944287
chr1	9182007	9183750	1743	-	ENSG00000228526.3	lincRNA	RP3-510D11.1	OTTHUMG00000001762.2	lincRNA	1	0.573723
chr1	9652610	9654586	1976	-	ENSG00000179840.5	antisense	PIK3CD-AS1	OTTHUMG00000001452.1	lncRNA	1	0.506073
chr1	10429881	10430677	796	-	ENSG00000271989.1	antisense	RP4-736L20.3	OTTHUMG00000185648.1	lncRNA	1	1.25628
chr1	20732880	20733952	1072	+	ENSG00000233069.1	antisense	RP5-930J4.2	OTTHUMG00000002621.1	lncRNA	1	0.932836
chr1	23949016	23949383	367	-	ENSG00000230228.2	processed_pseudogene	RP11-4M23.4	OTTHUMG00000013896.2	pseudogene	1	2.7248
chr1	24961345	24963097	1752	+	ENSG00000229162.1	antisense	RP11-84D1.1	OTTHUMG00000003322.1	lncRNA	1	0.570776
chr1	26692132	26694131	1999	-	ENSG00000260063.1	antisense	RP5-968P14.2	OTTHUMG00000175777.1	lncRNA	1	0.50025
chr1	26876133	26878245	2112	+	ENSG00000226698.1	antisense	RP1-50O24.6	OTTHUMG00000004228.1	lncRNA	1	0.473485
chr1	39788976	39790171	1195	+	ENSG00000261798.1	antisense	RP1-118J21.25	OTTHUMG00000175804.1	lncRNA	1	0.83682
chr1	45303910	45305619	1709	+	ENSG00000281912.1	lincRNA	LINC01144	OTTHUMG00000189536.1	lincRNA	1	0.585138
chr1	47179250	47180339	1089	+	ENSG00000224805.2	antisense	LINC00853	OTTHUMG00000007850.2	lncRNA	1	0.918274
chr1	47432133	47434641	2508	-	ENSG00000237424.1	antisense	FOXD2-AS1	OTTHUMG00000007949.2	lncRNA	2	0.797448
chr1	53291791	53292138	347	-	ENSG00000225030.1	sense_intronic	RP4-784A16.3	OTTHUMG00000008933.1	lncRNA	1	2.88184
chr1	74468195	74469543	1348	+	ENSG00000233894.1	antisense	RP4-650F12.2	OTTHUMG00000009610.1	lncRNA	1	0.74184
chr1	86703502	86704462	960	-	ENSG00000261737.1	antisense	RP4-612B15.3	OTTHUMG00000175864.1	lncRNA	1	1.04167
chr1	92749175	92749330	155	-	ENSG00000234202.2	processed_pseudogene	RP11-330C7.4	OTTHUMG00000010893.2	pseudogene	1	6.45161
chr1	93847174	93848939	1765	+	ENSG00000260464.1	lincRNA	RP4-561L24.3	OTTHUMG00000175883.1	lincRNA	1	0.566572
chr1	108199926	108201491	1565	+	ENSG00000260879.1	antisense	RP11-483I13.5	OTTHUMG00000175898.1	lncRNA	1	0.638978
chr1	110963302	110964649	1347	+	ENSG00000273010.1	antisense	RP11-96K19.5	OTTHUMG00000186361.1	lncRNA	2	1.48478
chr1	112715672	112717796	2124	+	ENSG00000261595.1	antisense	RP11-426L16.9	OTTHUMG00000176040.1	lncRNA	1	0.47081
chr1	114032393	114034511	2118	+	ENSG00000282048.1	sense_intronic	RP4-590F24.2	OTTHUMG00000191422.1	lncRNA	1	0.472144
chr1	119886304	119886927	623	+	ENSG00000226446.1	processed_pseudogene	NOTCH2P1	OTTHUMG00000057603.1	pseudogene	1	1.60514
chr1	150255095	150257286	2191	-	ENSG00000276110.1	antisense	RP4-790G17.7	OTTHUMG00000185690.2	lncRNA	2	0.912825
chr1	151280024	151281929	1905	-	ENSG00000232671.5	antisense	RP11-126K1.2	OTTHUMG00000012346.6	lncRNA	1	0.524934
chr1	151340648	151341966	1318	+	ENSG00000224645.1	antisense	RP11-126K1.8	OTTHUMG00000073673.1	lncRNA	1	0.758725
chr1	154402328	154406564	4236	-	ENSG00000228013.1	antisense	RP11-350G8.5	OTTHUMG00000036070.1	lncRNA	2	0.472144
chr1	154480012	154481501	1489	+	ENSG00000273110.1	antisense	RP11-350G8.9	OTTHUMG00000186422.1	lncRNA	1	0.671592
chr1	154937370	154938059	689	+	ENSG00000270361.1	lincRNA	RP11-307C12.13	OTTHUMG00000185167.1	lincRNA	1	1.45138
chr1	154961825	154962623	798	+	ENSG00000271380.1	antisense	RP11-307C12.12	OTTHUMG00000185142.1	lncRNA	1	1.25313
chr1	156687695	156691997	4302	-	ENSG00000237588.2	lincRNA	RP11-66D17.3	OTTHUMG00000041297.2	lincRNA	2	0.4649
chr1	157073257	157074703	1446	+	ENSG00000224520.2	processed_pseudogene	KRT8P45	OTTHUMG00000041329.2	pseudogene	1	0.691563
chr1	179447578	179448440	862	-	ENSG00000224620.2	processed_pseudogene	MEF2AP1	OTTHUMG00000035267.2	pseudogene	1	1.16009
chr1	181190471	181191149	678	-	ENSG00000225359.1	lincRNA	RP11-540K16.2	OTTHUMG00000035181.1	lincRNA	1	1.47493
chr1	201222113	201223123	1010	-	ENSG00000229821.1	antisense	RP11-567E21.3	OTTHUMG00000040658.1	lncRNA	1	0.990099
chr1	206634649	206635622	973	-	ENSG00000237605.1	antisense	RP11-343H5.6	OTTHUMG00000036345.1	lncRNA	1	1.02775
chr1	220485104	220487043	1939	-	ENSG00000231529.1	lincRNA	RP11-410C4.4	OTTHUMG00000037350.1	lincRNA	1	0.51573
chr1	226331999	226333655	1656	-	ENSG00000275406.1	unprocessed_pseudogene	RP11-125A15.3	OTTHUMG00000187548.1	pseudogene	1	0.603865
chr1	227234269	227235355	1086	+	ENSG00000228729.1	processed_pseudogene	RP11-211A18.2	OTTHUMG00000037614.1	pseudogene	1	0.92081
chr1	234372807	234373593	786	-	ENSG00000231663.1	antisense	RP5-827C21.4	OTTHUMG00000037946.1	lncRNA	1	1.27226
chr1	234607008	234609483	2475	+	ENSG00000228830.1	antisense	RP4-781K5.2	OTTHUMG00000037978.1	lncRNA	2	0.808081
chr1	235104180	235104609	429	-	ENSG00000273416.1	lincRNA	RP4-597N16.4	OTTHUMG00000185835.1	lincRNA	1	2.331
chr1	239898016	239899872	1856	-	ENSG00000234601.1	antisense	CHRM3-AS1	OTTHUMG00000039650.1	lncRNA	1	0.538793
chr1	244969350	244971088	1738	-	ENSG00000272195.1	antisense	RP11-156E8.1	OTTHUMG00000185820.1	lncRNA	1	0.575374
chr1	247936061	247937513	1452	-	ENSG00000226191.3	processed_pseudogene	CLK3P2	OTTHUMG00000040208.2	pseudogene	1	0.688705
chr2	7671604	7672246	642	-	ENSG00000230515.1	lincRNA	AC092580.3	OTTHUMG00000151592.1	lincRNA	1	1.55763
chr2	10021578	10022825	1247	+	ENSG00000260476.1	lincRNA	RP11-254F7.1	OTTHUMG00000175723.1	lincRNA	1	0.801925
chr2	11681460	11683328	1868	+	ENSG00000228496.1	sense_intronic	AC106875.1	OTTHUMG00000151822.1	lncRNA	1	0.535332
chr2	12715415	12716227	812	+	ENSG00000261117.1	lincRNA	RP11-333O1.1	OTTHUMG00000175731.1	lincRNA	1	1.23153
chr2	21362292	21364025	1733	-	ENSG00000270654.1	processed_pseudogene	NUTF2P8	OTTHUMG00000184437.1	pseudogene	1	0.577034
chr2	28396815	28397110	295	+	ENSG00000270640.1	sense_intronic	RP11-373D23.2	OTTHUMG00000185291.1	lncRNA	1	3.38983
chr2	38535258	38536249	991	-	ENSG00000271443.1	transcribed_processed_pseudogene	RP11-541E12.1	OTTHUMG00000184445.1	pseudogene	1	1.00908
chr2	43227210	43228855	1645	+	ENSG00000279873.2	lincRNA	LINC01126	OTTHUMG00000152397.3	lincRNA	1	0.607903
chr2	43229573	43233394	3821	+	ENSG00000234936.1	antisense	AC010883.5	OTTHUMG00000152402.2	lncRNA	2	0.523423
chr2	47905678	47907810	2132	+	ENSG00000233230.1	antisense	AC079807.2	OTTHUMG00000151834.2	lncRNA	1	0.469043
chr2	55617909	55618373	464	+	ENSG00000272606.1	antisense	RP11-554J4.1	OTTHUMG00000185926.1	lncRNA	1	2.15517
chr2	64330486	64332131	1645	-	ENSG00000238012.1	lincRNA	AC114752.1	OTTHUMG00000152671.1	lincRNA	1	0.607903
chr2	64522187	64524093	1906	-	ENSG00000260101.1	lincRNA	RP11-568N6.1	OTTHUMG00000175896.1	lincRNA	1	0.524659
chr2	64644612	64646698	2086	+	ENSG00000226756.1	lincRNA	AC007365.3	OTTHUMG00000152702.1	lincRNA	2	0.958773
chr2	70301451	70302072	621	+	ENSG00000233849.1	antisense	AC022201.5	OTTHUMG00000154180.1	lncRNA	1	1.61031
chr2	74148009	74150061	2052	+	ENSG00000225439.2	antisense	BOLA3-AS1	OTTHUMG00000152835.2	lncRNA	1	0.487329
chr2	74502595	74504678	2083	+	ENSG00000257702.3	antisense	LBX2-AS1	OTTHUMG00000170509.3	lncRNA	1	0.480077
chr2	85186409	85187253	844	+	ENSG00000231134.1	sense_intronic	TCF7L1-IT1	OTTHUMG00000153211.1	lncRNA	1	1.18483
chr2	95413456	95414296	840	-	ENSG00000248821.1	unprocessed_pseudogene	AC009238.6	OTTHUMG00000155175.1	pseudogene	1	1.19048
chr2	95525109	95526702	1593	-	ENSG00000272913.1	lincRNA	RP11-440D17.3	OTTHUMG00000186024.1	lincRNA	1	0.627746
chr2	104412227	104414008	1781	-	ENSG00000225765.1	lincRNA	AC068535.3	OTTHUMG00000153049.1	lincRNA	1	0.561482
chr2	109127327	109128930	1603	-	ENSG00000259863.1	lincRNA	SH3RF3-AS1	OTTHUMG00000153437.1	lincRNA	1	0.62383
chr2	111887914	111888741	827	+	ENSG00000236307.2	processed_pseudogene	EEF1E1P1	OTTHUMG00000153261.2	pseudogene	1	1.20919
chr2	113888203	113889750	1547	-	ENSG00000270019.1	lincRNA	RP11-141B14.1	OTTHUMG00000183982.1	lincRNA	1	0.646412
chr2	162073256	162075169	1913	+	ENSG00000230918.1	antisense	AC008063.2	OTTHUMG00000153863.1	lncRNA	1	0.522739
chr2	169767185	169768799	1614	-	ENSG00000231550.1	processed_pseudogene	PTCHD3P2	OTTHUMG00000154119.1	pseudogene	1	0.619579
chr2	172464262	172466022	1760	-	ENSG00000232788.1	antisense	AC078883.3	OTTHUMG00000154089.1	lncRNA	1	0.568182
chr2	172674212	172674898	686	-	ENSG00000230104.1	processed_pseudogene	AC018712.2	OTTHUMG00000154093.1	pseudogene	1	1.45773
chr2	177264359	177265515	1156	+	ENSG00000222043.2	antisense	AC079305.10	OTTHUMG00000154178.1	lncRNA	1	0.865052
chr2	181961212	181962478	1266	-	ENSG00000213958.2	processed_pseudogene	KRT18P29	OTTHUMG00000154327.1	pseudogene	1	0.789889
chr2	189762704	189765556	2852	+	ENSG00000253559.1	antisense	OSGEPL1-AS1	OTTHUMG00000164097.1	lncRNA	3	1.05189
chr2	189763859	189764456	597	-	ENSG00000273240.1	antisense	RP11-455J20.3	OTTHUMG00000186272.1	lncRNA	1	1.67504
chr2	202032770	202033537	767	-	ENSG00000273209.1	lincRNA	RP11-107N15.1	OTTHUMG00000186300.1	lincRNA	1	1.30378
chr2	206084605	206086564	1959	+	ENSG00000227946.1	lincRNA	AC007383.3	OTTHUMG00000154653.1	lincRNA	1	0.510465
chr2	208255247	208256181	934	+	ENSG00000231908.1	antisense	IDH1-AS1	OTTHUMG00000154707.1	lncRNA	1	1.07066
chr2	208269343	208269957	614	-	ENSG00000228380.1	processed_pseudogene	MYL6BP1	OTTHUMG00000154704.1	pseudogene	1	1.62866
chr2	208466238	208466626	388	-	ENSG00000227430.1	processed_pseudogene	AC019185.2	OTTHUMG00000154661.1	pseudogene	1	2.57732
chr2	221572506	221574454	1948	+	ENSG00000272944.1	antisense	CTD-2308L22.1	OTTHUMG00000186317.1	lncRNA	2	1.02669
chr2	222317242	222318653	1411	-	ENSG00000267034.1	lincRNA	RP11-384O8.1	OTTHUMG00000180633.1	lincRNA	1	0.708717
chr2	231452195	231453153	958	+	ENSG00000233538.1	lincRNA	AC017104.2	OTTHUMG00000153867.1	lincRNA	1	1.04384
chr2	241724615	241725693	1078	-	ENSG00000235351.1	antisense	AC114730.11	OTTHUMG00000151506.1	lncRNA	1	0.927644
chr2	241734715	241735498	783	-	ENSG00000215692.2	antisense	AC114730.8	OTTHUMG00000151478.1	lncRNA	1	1.27714
chr3	25441164	25441502	338	-	ENSG00000229421.1	processed_pseudogene	AC133141.1	OTTHUMG00000155597.2	pseudogene	1	2.95858
chr3	26712307	26713364	1057	+	ENSG00000234165.1	lincRNA	AC114877.3	OTTHUMG00000155686.1	lincRNA	1	0.946074
chr3	40970541	40971578	1037	-	ENSG00000233096.1	lincRNA	RP11-520A21.1	OTTHUMG00000156006.1	lincRNA	1	0.96432
chr3	43087479	43088068	589	+	ENSG00000227245.1	lincRNA	RP11-136C24.2	OTTHUMG00000156464.1	lincRNA	1	1.69779
chr3	49029316	49029706	390	+	ENSG00000272434.1	antisense	RP13-131K19.6	OTTHUMG00000185526.1	lncRNA	1	2.5641
chr3	52239258	52241097	1839	+	ENSG00000243224.1	antisense	RP5-1157M23.2	OTTHUMG00000158107.1	lncRNA	2	1.08755
chr3	55487699	55488308	609	+	ENSG00000244586.1	antisense	WNT5A-AS1	OTTHUMG00000158382.1	lncRNA	1	1.64204
chr3	57078943	57080101	1158	+	ENSG00000272202.1	antisense	RP11-157F20.3	OTTHUMG00000185634.1	lncRNA	1	0.863558
chr3	140972744	140973255	511	+	ENSG00000248773.1	sense_intronic	RP11-231L11.3	OTTHUMG00000160261.1	lncRNA	1	1.95695
chr3	146589602	146590325	723	+	ENSG00000241457.1	antisense	PLSCR5-AS1	OTTHUMG00000159436.1	lncRNA	1	1.38313
chr3	150238519	150240209	1690	+	ENSG00000244541.5	lincRNA	LINC01213	OTTHUMG00000159737.1	lincRNA	1	0.591716
chr3	156671862	156674378	2516	-	ENSG00000243926.1	antisense	TIPARP-AS1	OTTHUMG00000158643.1	lncRNA	2	0.794913
chr3	175938929	175941037	2108	-	ENSG00000260217.1	lincRNA	RP11-809F4.3	OTTHUMG00000175847.2	lincRNA	1	0.474383
chr3	179649494	179650200	706	-	ENSG00000243977.1	processed_pseudogene	RP11-473P24.2	OTTHUMG00000157785.1	pseudogene	1	1.41643
chr4	3323977	3324762	785	-	ENSG00000248843.1	processed_pseudogene	RP11-357G3.1	OTTHUMG00000157427.1	pseudogene	1	1.27389
chr4	26859806	26860599	793	-	ENSG00000240005.5	antisense	RP11-293A21.1	OTTHUMG00000159680.2	lncRNA	1	1.26103
chr4	39133913	39135608	1695	+	ENSG00000249685.1	lincRNA	RP11-360F5.3	OTTHUMG00000160465.1	lincRNA	1	0.589971
chr4	55547112	55547889	777	+	ENSG00000272969.1	antisense	RP11-528I4.2	OTTHUMG00000186305.1	lncRNA	1	1.287
chr4	76756960	76758474	1514	-	ENSG00000233860.1	antisense	RP11-359D14.2	OTTHUMG00000157074.3	lncRNA	1	0.660502
chr4	81919995	81920387	392	-	ENSG00000248448.2	processed_pseudogene	COX5BP1	OTTHUMG00000160936.2	pseudogene	1	2.55102
chr4	82275071	82276600	1529	+	ENSG00000234568.3	processed_pseudogene	BIN2P1	OTTHUMG00000160953.1	pseudogene	1	0.654022
chr4	128069014	128069612	598	-	ENSG00000241651.4	processed_pseudogene	RP11-214O14.1	OTTHUMG00000157552.2	pseudogene	1	1.67224
chr4	135371177	135371924	747	-	ENSG00000250834.1	processed_pseudogene	KRT18P54	OTTHUMG00000161222.1	pseudogene	1	1.33869
chr4	146241806	146243669	1863	+	ENSG00000251010.1	antisense	RP11-6L6.7	OTTHUMG00000162030.1	lncRNA	2	1.07354
chr4	151407551	151408835	1284	-	ENSG00000251611.1	lincRNA	RP11-610P16.1	OTTHUMG00000161670.1	lincRNA	1	0.778816
chr4	157204462	157204855	393	-	ENSG00000249819.1	processed_pseudogene	RP11-392C20.1	OTTHUMG00000161953.1	pseudogene	1	2.54453
chr4	165016887	165017433	546	+	ENSG00000276623.1	processed_pseudogene	RP11-366M4.19	OTTHUMG00000187585.1	pseudogene	1	1.8315
chr4	184471924	184472609	685	-	ENSG00000270426.1	sense_intronic	RP11-326I11.5	OTTHUMG00000185263.1	lncRNA	1	1.45985
chr5	10627260	10628225	965	-	ENSG00000250106.1	antisense	ANKRD33B-AS1	OTTHUMG00000162124.1	lncRNA	1	1.03627
chr5	10775058	10777062	2004	-	ENSG00000250576.1	lincRNA	CTD-2154B17.1	OTTHUMG00000162122.1	lincRNA	1	0.499002
chr5	14872332	14872713	381	+	ENSG00000272057.1	lincRNA	CTB-40H15.4	OTTHUMG00000185443.1	lincRNA	1	2.62467
chr5	33997044	33997724	680	-	ENSG00000250767.1	processed_pseudogene	RP11-1084J3.3	OTTHUMG00000162528.1	pseudogene	1	1.47059
chr5	43041575	43045390	3815	+	ENSG00000215068.7	antisense	AC025171.1	OTTHUMG00000131146.2	lncRNA	2	0.524246
chr5	43231812	43233173	1361	-	ENSG00000247763.2	processed_pseudogene	RP11-447H19.1	OTTHUMG00000162228.2	pseudogene	1	0.734754
chr5	71475761	71476316	555	-	ENSG00000253536.1	processed_pseudogene	RP11-1174L13.2	OTTHUMG00000163655.1	pseudogene	1	1.8018
chr5	73451498	73453395	1897	+	ENSG00000251604.1	lincRNA	LINC01385	OTTHUMG00000162491.1	lincRNA	1	0.527148
chr5	78222184	78222517	333	+	ENSG00000249372.1	processed_pseudogene	ATP6V1G1P6	OTTHUMG00000162480.1	pseudogene	1	3.003
chr5	79191549	79191747	198	+	ENSG00000249829.2	processed_pseudogene	CTC-422A18.1	OTTHUMG00000162789.2	pseudogene	1	5.05051
chr5	88602780	88603117	337	+	ENSG00000250705.1	processed_pseudogene	CTC-470C15.1	OTTHUMG00000162633.1	pseudogene	1	2.96736
chr5	95834424	95835046	622	-	ENSG00000251000.1	processed_pseudogene	AC008592.3	OTTHUMG00000162736.1	pseudogene	1	1.60772
chr5	98769618	98773469	3851	-	ENSG00000246763.6	antisense	RGMB-AS1	OTTHUMG00000162743.1	lncRNA	2	0.519346
chr5	109467353	109467952	599	+	ENSG00000251367.1	lincRNA	RP11-231G15.2	OTTHUMG00000163118.1	lincRNA	1	1.66945
chr5	112173570	112175548	1978	+	ENSG00000250882.1	antisense	CTC-459M5.1	OTTHUMG00000162896.1	lncRNA	1	0.505561
chr5	112419583	112420978	1395	+	ENSG00000278921.2	lincRNA	EPB41L4A-AS2	OTTHUMG00000169519.1	lincRNA	1	0.716846
chr5	115770586	115770989	403	+	ENSG00000251118.1	processed_pseudogene	CTC-505O3.1	OTTHUMG00000162915.2	pseudogene	1	2.48139
chr5	124919947	124921598	1651	+	ENSG00000249423.1	lincRNA	RP11-284A20.1	OTTHUMG00000162992.1	lincRNA	1	0.605694
chr5	130140031	130141950	1919	+	ENSG00000248610.1	processed_pseudogene	HSPA8P4	OTTHUMG00000163044.1	pseudogene	1	0.521105
chr5	132179234	132181128	1894	-	ENSG00000224015.1	lincRNA	AC063976.3	OTTHUMG00000059642.1	lincRNA	1	0.527983
chr5	134005147	134005562	415	+	ENSG00000271737.1	lincRNA	CTB-113I20.2	OTTHUMG00000185563.1	lincRNA	1	2.40964
chr5	139648999	139649728	729	-	ENSG00000250635.1	lincRNA	CTD-3224K15.2	OTTHUMG00000163330.1	lincRNA	1	1.37174
chr5	139775305	139775472	167	+	ENSG00000271792.1	lincRNA	CTB-35F21.5	OTTHUMG00000185580.1	lincRNA	1	5.98802
chr5	141350109	141350662	553	-	ENSG00000280026.1	antisense	AC005618.8	OTTHUMG00000189141.1	lncRNA	1	1.80832
chr5	142317620	142318322	702	-	ENSG00000281881.1	lincRNA	SPRY4-IT1	OTTHUMG00000189512.1	lincRNA	1	1.4245
chr5	147887112	147887704	592	+	ENSG00000251320.1	antisense	CTC-327F10.4	OTTHUMG00000163419.1	lncRNA	1	1.68919
chr5	151319422	151319776	354	+	ENSG00000270904.1	processed_pseudogene	CTC-224D3.1	OTTHUMG00000184553.1	pseudogene	1	2.82486
chr5	159950493	159951498	1005	-	ENSG00000248626.1	processed_pseudogene	GAPDHP40	OTTHUMG00000159985.1	pseudogene	1	0.995025
chr5	171365595	171367693	2098	+	ENSG00000254256.1	processed_pseudogene	RP11-117L6.1	OTTHUMG00000163206.1	pseudogene	1	0.476644
chr5	173144162	173145039	877	-	ENSG00000253172.1	antisense	CTC-209H22.3	OTTHUMG00000163320.1	lncRNA	2	2.2805
chr5	174056060	174056585	525	-	ENSG00000253244.1	antisense	RP11-619L12.3	OTTHUMG00000163446.1	lncRNA	1	1.90476
chr5	180293245	180295253	2008	+	ENSG00000248367.1	antisense	CTB-129O4.1	OTTHUMG00000163311.1	lncRNA	1	0.498008
chr5	181191046	181191852	806	-	ENSG00000248473.1	lincRNA	CTC-338M12.2	OTTHUMG00000162379.1	lincRNA	1	1.24069
chr6	524171	525581	1410	+	ENSG00000230433.1	antisense	RP1-20B11.2	OTTHUMG00000014117.2	lncRNA	1	0.70922
chr6	2910613	2912113	1500	-	ENSG00000232999.1	unitary_pseudogene	RP1-90J20.10	OTTHUMG00000155040.1	pseudogene	1	0.666667
chr6	2987967	2991173	3206	+	ENSG00000244041.7	lincRNA	LINC01011	OTTHUMG00000014128.5	lincRNA	2	0.62383
chr6	3978062	3979099	1037	+	ENSG00000216657.1	processed_pseudogene	GLRX3P2	OTTHUMG00000014155.1	pseudogene	1	0.96432
chr6	6758276	6759291	1015	-	ENSG00000224532.2	lincRNA	RP3-470L22.1	OTTHUMG00000014193.2	lincRNA	1	0.985222
chr6	10423140	10426176	3036	-	ENSG00000228478.1	lincRNA	RP1-290I10.3	OTTHUMG00000014230.1	lincRNA	2	0.658762
chr6	15247815	15248634	819	-	ENSG00000235488.1	antisense	JARID2-AS1	OTTHUMG00000014292.1	lncRNA	1	1.221
chr6	16761138	16762652	1514	+	ENSG00000229931.1	antisense	RP1-151F17.1	OTTHUMG00000153136.1	lncRNA	2	1.321
chr6	25882026	25882395	369	-	ENSG00000242387.1	transcribed_processed_pseudogene	HIST1H2APS2	OTTHUMG00000187599.1	pseudogene	1	2.71003
chr6	26321876	26322292	416	-	ENSG00000220875.1	processed_pseudogene	HIST1H3PS1	OTTHUMG00000014455.1	pseudogene	1	2.40385
chr6	28837869	28839006	1137	-	ENSG00000225173.1	lincRNA	XXbac-BPG308K3.5	OTTHUMG00000084883.1	lincRNA	1	0.879507
chr6	28896530	28897322	792	+	ENSG00000224157.1	antisense	HCG14	OTTHUMG00000031281.1	lncRNA	1	1.26263
chr6	29071824	29072599	775	-	ENSG00000236909.1	unprocessed_pseudogene	OR2P1P	OTTHUMG00000031042.3	pseudogene	1	1.29032
chr6	29791753	29792750	997	-	ENSG00000176998.4	unprocessed_pseudogene	HCG4	OTTHUMG00000035423.2	pseudogene	1	1.00301
chr6	32970232	32970886	654	+	ENSG00000223837.2	sense_intronic	BRD2-IT1	OTTHUMG00000140321.2	lncRNA	1	1.52905
chr6	45421079	45422005	926	-	ENSG00000271857.1	antisense	RP1-244F24.1	OTTHUMG00000185755.1	lncRNA	1	1.07991
chr6	67933485	67934682	1197	+	ENSG00000270509.1	processed_pseudogene	RP11-301G19.2	OTTHUMG00000184409.1	pseudogene	1	0.835422
chr6	72522641	72523238	597	+	ENSG00000217483.1	processed_pseudogene	RP11-135M8__A.1	OTTHUMG00000015011.1	pseudogene	1	1.67504
chr6	85659892	85660606	714	-	ENSG00000220563.1	processed_pseudogene	PKMP3	OTTHUMG00000015143.1	pseudogene	1	1.40056
chr6	109382795	109383666	871	+	ENSG00000260273.1	antisense	RP11-425D10.10	OTTHUMG00000175937.1	lncRNA	1	1.14811
chr6	126627484	126628570	1086	-	ENSG00000275953.1	processed_pseudogene	RP11-753G20.2	OTTHUMG00000187640.1	pseudogene	1	0.92081
chr6	137705423	137707201	1778	-	ENSG00000220412.1	processed_pseudogene	RP11-95M15.2	OTTHUMG00000015660.1	pseudogene	1	0.56243
chr6	138402585	138403560	975	-	ENSG00000215878.3	processed_pseudogene	MARCKSL1P2	OTTHUMG00000015672.2	pseudogene	1	1.02564
chr6	144036618	144037704	1086	+	ENSG00000217231.2	processed_pseudogene	RP3-340H11.2	OTTHUMG00000015735.3	pseudogene	1	0.92081
chr6	152898047	152899280	1233	+	ENSG00000217372.2	processed_pseudogene	TUBB4BP7	OTTHUMG00000015853.2	pseudogene	1	0.81103
chr6	156776360	156778422	2062	-	ENSG00000271551.2	antisense	RP11-230C9.2	OTTHUMG00000185117.2	lncRNA	1	0.484966
chr6	157323964	157324477	513	+	ENSG00000271040.1	lincRNA	RP5-933K21.3	OTTHUMG00000185283.1	lincRNA	1	1.94932
chr6	166275462	166277077	1615	-	ENSG00000280850.1	lincRNA	RP4-655C5.9	OTTHUMG00000190284.1	lincRNA	1	0.619195
chr6	166383189	166384824	1635	+	ENSG00000261420.1	antisense	RP1-168L15.5	OTTHUMG00000175947.1	lncRNA	1	0.611621
chr7	20328299	20331747	3448	-	ENSG00000271133.5	antisense	CTA-293F17.1	OTTHUMG00000185140.1	lncRNA	3	0.87007
chr7	22725395	22727620	2225	-	ENSG00000179428.2	antisense	AC073072.5	OTTHUMG00000152547.1	lncRNA	2	0.898876
chr7	28615097	28615888	791	-	ENSG00000225286.1	processed_pseudogene	AC005105.2	OTTHUMG00000152816.1	pseudogene	1	1.26422
chr7	35971147	35971567	420	-	ENSG00000270889.1	processed_pseudogene	RP11-609L3.1	OTTHUMG00000184662.1	pseudogene	1	2.38095
chr7	50141540	50142823	1283	-	ENSG00000228005.1	antisense	AC020743.2	OTTHUMG00000155880.1	lncRNA	1	0.779423
chr7	55593777	55595006	1229	+	ENSG00000231394.1	lincRNA	RP11-310H4.3	OTTHUMG00000156122.1	lincRNA	1	0.81367
chr7	65840212	65840596	384	+	ENSG00000236529.1	processed_pseudogene	RP13-254B10.1	OTTHUMG00000156742.1	pseudogene	1	2.60417
chr7	66902857	66906297	3440	+	ENSG00000273142.1	lincRNA	RP11-458F8.4	OTTHUMG00000186265.1	lincRNA	2	0.581395
chr7	105013425	105014321	896	-	ENSG00000239569.3	antisense	KMT2E-AS1	OTTHUMG00000157280.1	lncRNA	1	1.11607
chr7	107742817	107744581	1764	-	ENSG00000241764.3	antisense	AC002467.7	OTTHUMG00000154805.3	lncRNA	1	0.566893
chr7	121398452	121398767	315	+	ENSG00000213310.3	processed_pseudogene	CYCSP19	OTTHUMG00000157004.1	pseudogene	1	3.1746
chr7	131753746	131754252	506	-	ENSG00000236281.1	processed_pseudogene	AC093106.5	OTTHUMG00000155054.1	pseudogene	1	1.97628
chr7	135168403	135169547	1144	+	ENSG00000272941.1	antisense	RP11-134L10.1	OTTHUMG00000186343.1	lncRNA	1	0.874126
chr7	143379692	143380495	803	-	ENSG00000232533.1	antisense	AC093673.5	OTTHUMG00000152694.1	lncRNA	1	1.24533
chr7	151028781	151029754	973	-	ENSG00000243433.1	antisense	RP11-148K1.10	OTTHUMG00000158684.1	lncRNA	1	1.02775
chr8	6928608	6930473	1865	+	ENSG00000254625.1	antisense	GS1-24F4.3	OTTHUMG00000165211.1	lncRNA	1	0.536193
chr8	11553224	11554207	983	-	ENSG00000254774.1	antisense	RP11-148O21.3	OTTHUMG00000165415.1	lncRNA	1	1.01729
chr8	30082758	30083467	709	+	ENSG00000272256.1	antisense	RP11-489E7.4	OTTHUMG00000185429.1	lncRNA	1	1.41044
chr8	41828165	41829934	1769	-	ENSG00000260588.1	lincRNA	RP11-930P14.2	OTTHUMG00000164085.2	lincRNA	2	1.13058
chr8	42151772	42152763	991	-	ENSG00000261449.1	antisense	RP11-589C21.5	OTTHUMG00000173375.1	lncRNA	2	2.01816
chr8	43276270	43276823	553	-	ENSG00000234713.3	processed_pseudogene	RP11-726G23.10	OTTHUMG00000164109.1	pseudogene	1	1.80832
chr8	47194002	47194347	345	-	ENSG00000253502.1	processed_pseudogene	ATP6V1G1P2	OTTHUMG00000164147.1	pseudogene	1	2.89855
chr8	51810110	51810681	571	-	ENSG00000272076.1	lincRNA	RP11-11C20.3	OTTHUMG00000185455.1	lincRNA	1	1.75131
chr8	56074592	56075274	682	+	ENSG00000253603.1	antisense	CTA-397H3.3	OTTHUMG00000164298.1	lncRNA	1	1.46628
chr8	85177522	85178150	628	-	ENSG00000254208.1	antisense	RP11-219B4.3	OTTHUMG00000164786.1	lncRNA	1	1.59236
chr8	97788210	97788357	147	-	ENSG00000270682.1	processed_pseudogene	KB-1907C4.2	OTTHUMG00000184717.1	pseudogene	1	6.80272
chr8	101223941	101224573	632	-	ENSG00000253942.1	processed_pseudogene	KB-1410C5.1	OTTHUMG00000164824.1	pseudogene	1	1.58228
chr8	104990308	104990692	384	-	ENSG00000253997.1	processed_pseudogene	RP11-200A13.3	OTTHUMG00000164815.1	pseudogene	1	2.60417
chr8	109973943	109974781	838	+	ENSG00000255402.1	antisense	RP11-696P8.2	OTTHUMG00000165638.1	lncRNA	1	1.19332
chr8	122779971	122780830	859	-	ENSG00000272384.1	lincRNA	RP11-44N11.2	OTTHUMG00000185333.1	lincRNA	1	1.16414
chr8	123924759	123925933	1174	-	ENSG00000254000.1	lincRNA	RP11-245A18.1	OTTHUMG00000164999.1	lincRNA	1	0.851789
chr8	124996985	124998198	1213	-	ENSG00000253513.1	antisense	RP11-6D1.3	OTTHUMG00000164989.1	lncRNA	1	0.824402
chr8	127400399	127402150	1751	+	ENSG00000280997.1	lincRNA	CCAT2	OTTHUMG00000189734.1	lincRNA	1	0.571102
chr8	140636281	140638283	2002	+	ENSG00000280303.2	lincRNA	ERICD	OTTHUMG00000164249.2	lincRNA	2	0.999001
chr8	144409492	144409976	484	+	ENSG00000272115.1	antisense	GS1-393G12.14	OTTHUMG00000185629.1	lncRNA	1	2.06612
chr8	144463817	144465101	1284	+	ENSG00000254578.1	antisense	CTD-2517M22.16	OTTHUMG00000165651.1	lncRNA	1	0.778816
chr9	3647335	3648338	1003	+	ENSG00000237359.1	lincRNA	RP11-509J21.2	OTTHUMG00000019458.1	lincRNA	1	0.997009
chr9	14068932	14069417	485	+	ENSG00000213954.3	processed_pseudogene	ATP5HP3	OTTHUMG00000019568.2	pseudogene	1	2.06186
chr9	19967239	19967994	755	-	ENSG00000277711.1	processed_pseudogene	RP11-378I6.3	OTTHUMG00000187717.1	pseudogene	1	1.3245
chr9	21394888	21396346	1458	-	ENSG00000261696.1	lincRNA	RP11-354P17.15	OTTHUMG00000175506.1	lincRNA	1	0.685871
chr9	21403081	21403651	570	+	ENSG00000235108.1	unprocessed_pseudogene	IFNA12P	OTTHUMG00000019678.1	pseudogene	1	1.75439
chr9	21455484	21456049	565	+	ENSG00000238271.2	unprocessed_pseudogene	IFNWP19	OTTHUMG00000019680.2	pseudogene	1	1.76991
chr9	21995482	21996013	531	+	ENSG00000266446.1	sense_intronic	RP11-149I2.4	OTTHUMG00000179348.1	lncRNA	1	1.88324
chr9	30773464	30774732	1268	+	ENSG00000235626.2	processed_pseudogene	KRT18P66	OTTHUMG00000019729.1	pseudogene	1	0.788644
chr9	33719690	33722555	2865	+	ENSG00000227301.1	lincRNA	RP11-384P7.5	OTTHUMG00000000412.1	lincRNA	2	0.69808
chr9	34546524	34546996	472	-	ENSG00000232983.2	processed_pseudogene	RP11-296L22.7	OTTHUMG00000000444.2	pseudogene	1	2.11864
chr9	35096378	35098141	1763	+	ENSG00000234181.1	antisense	RP11-182N22.8	OTTHUMG00000019849.1	lncRNA	1	0.567215
chr9	35646270	35647099	829	+	ENSG00000227933.1	antisense	RP11-331F9.4	OTTHUMG00000019866.1	lncRNA	1	1.20627
chr9	35756712	35757940	1228	-	ENSG00000228843.2	antisense	RP11-112J3.15	OTTHUMG00000019883.2	lncRNA	1	0.814332
chr9	35859062	35859983	921	-	ENSG00000236083.1	unitary_pseudogene	OR13E1P	OTTHUMG00000019877.1	pseudogene	1	1.08578
chr9	69672749	69673713	964	+	ENSG00000261447.1	lincRNA	RP11-109D9.4	OTTHUMG00000175664.1	lincRNA	1	1.03734
chr9	76419934	76420631	697	+	ENSG00000233814.1	processed_pseudogene	RP11-66C24.1	OTTHUMG00000020042.1	pseudogene	1	1.43472
chr9	77176756	77177994	1238	-	ENSG00000232998.1	antisense	VPS13A-AS1	OTTHUMG00000020054.1	lncRNA	1	0.807754
chr9	86414282	86414570	288	+	ENSG00000235819.1	lincRNA	RP11-359J6.1	OTTHUMG00000020138.1	lincRNA	1	3.47222
chr9	91426238	91427144	906	+	ENSG00000233081.1	lincRNA	RP11-440G5.2	OTTHUMG00000020208.1	lincRNA	1	1.10375
chr9	99183373	99184891	1518	+	ENSG00000227269.1	lincRNA	RP11-96L7.2	OTTHUMG00000020352.1	lincRNA	1	0.658762
chr9	132768965	132770212	1247	-	ENSG00000224992.2	sense_intronic	RP11-295G24.5	OTTHUMG00000020846.2	lncRNA	1	0.801925
chr9	136122521	136124363	1842	+	ENSG00000275329.1	lincRNA	RP11-83N9.6	OTTHUMG00000187245.1	lincRNA	1	0.542888
chr9	137063535	137064581	1046	+	ENSG00000231864.2	antisense	RP11-229P13.23	OTTHUMG00000020975.2	lncRNA	1	0.956023
chr9	137084946	137086817	1871	-	ENSG00000268996.3	antisense	MAN1B1-AS1	OTTHUMG00000187259.3	lncRNA	1	0.534474
chr9	137286112	137287236	1124	+	ENSG00000270259.2	processed_pseudogene	RP13-122B23.9	OTTHUMG00000184711.2	pseudogene	1	0.88968
chr9	137293868	137295721	1853	-	ENSG00000260996.1	sense_overlapping	RP13-122B23.8	OTTHUMG00000175633.1	lncRNA	2	1.07933
chr10	8052242	8053449	1207	-	ENSG00000243350.1	lincRNA	RP11-379F12.3	OTTHUMG00000017641.1	lincRNA	1	0.8285
chr10	43420738	43422100	1362	+	ENSG00000230555.2	lincRNA	RP11-517P14.2	OTTHUMG00000018028.2	lincRNA	1	0.734214
chr10	63465229	63466563	1334	+	ENSG00000272767.1	antisense	JMJD1C-AS1	OTTHUMG00000186280.1	lncRNA	1	0.749625
chr10	72274915	72275980	1065	-	ENSG00000269926.1	antisense	RP11-442H21.2	OTTHUMG00000018435.2	lncRNA	1	0.938967
chr10	73252791	73254349	1558	+	ENSG00000227540.1	antisense	RP11-152N13.5	OTTHUMG00000018458.1	lncRNA	1	0.641849
chr10	84138420	84140582	2162	-	ENSG00000271933.1	antisense	RP11-338I21.1	OTTHUMG00000185666.1	lncRNA	1	0.462535
chr10	88727485	88728914	1429	+	ENSG00000226358.1	processed_pseudogene	KRT8P38	OTTHUMG00000018697.1	pseudogene	1	0.69979
chr10	89837612	89839334	1722	-	ENSG00000270670.1	processed_pseudogene	RP11-248C1.3	OTTHUMG00000184689.1	pseudogene	1	0.58072
chr10	91908131	91909348	1217	+	ENSG00000272817.1	antisense	RP11-402D21.2	OTTHUMG00000186460.1	lncRNA	1	0.821693
chr10	95183653	95184217	564	+	ENSG00000225533.1	processed_pseudogene	PAWRP1	OTTHUMG00000018807.1	pseudogene	1	1.77305
chr10	101060029	101061005	976	-	ENSG00000273162.1	lincRNA	RP11-108L7.15	OTTHUMG00000186479.1	lincRNA	1	1.02459
chr10	120597949	120600124	2175	+	ENSG00000177234.7	lincRNA	LINC01561	OTTHUMG00000019167.3	lincRNA	1	0.45977
chr10	133246478	133247891	1413	-	ENSG00000166917.8	antisense	MIR202HG	OTTHUMG00000170605.1	lncRNA	1	0.707714
chr11	1309769	1310707	938	+	ENSG00000255153.1	antisense	TOLLIP-AS1	OTTHUMG00000166230.1	lncRNA	1	1.0661
chr11	3854318	3855509	1191	-	ENSG00000228661.1	antisense	AC090587.5	OTTHUMG00000012285.1	lncRNA	1	0.839631
chr11	3854612	3855399	787	+	ENSG00000229368.1	sense_overlapping	AC090587.4	OTTHUMG00000012284.1	lncRNA	1	1.27065
chr11	6297189	6298606	1417	-	ENSG00000270435.1	processed_pseudogene	RP11-304C12.4	OTTHUMG00000184841.1	pseudogene	1	0.705716
chr11	6603642	6604420	778	-	ENSG00000254400.1	antisense	RP11-732A19.8	OTTHUMG00000166620.1	lncRNA	2	2.57069
chr11	14907518	14907986	468	+	ENSG00000253179.1	unprocessed_pseudogene	CALCP	OTTHUMG00000164573.23	pseudogene	2	4.2735
chr11	45771432	45772358	926	+	ENSG00000205106.4	lincRNA	DKFZp779M0652	OTTHUMG00000166518.1	lincRNA	2	2.15983
chr11	46238382	46239267	885	+	ENSG00000254639.1	lincRNA	CTD-2589M5.5	OTTHUMG00000166909.1	lincRNA	1	1.12994
chr11	47270657	47272110	1453	-	ENSG00000256746.5	antisense	RP11-17G12.3	OTTHUMG00000167884.1	lncRNA	1	0.688231
chr11	55714996	55715632	636	+	ENSG00000254457.1	unprocessed_pseudogene	OR5D2P	OTTHUMG00000166804.1	pseudogene	1	1.57233
chr11	57476493	57477534	1041	-	ENSG00000255301.1	antisense	RP11-624G17.3	OTTHUMG00000167029.1	lncRNA	2	1.92123
chr11	59142121	59142610	489	-	ENSG00000255381.1	processed_pseudogene	AP001258.5	OTTHUMG00000167436.1	pseudogene	1	2.04499
chr11	59263389	59263802	413	-	ENSG00000254799.1	processed_pseudogene	SLC25A47P1	OTTHUMG00000167415.1	pseudogene	1	2.42131
chr11	59753015	59754975	1960	-	ENSG00000254477.1	antisense	AP000640.10	OTTHUMG00000167407.1	lncRNA	1	0.510204
chr11	62786023	62786785	762	-	ENSG00000269176.2	antisense	RP11-727F15.12	OTTHUMG00000183002.2	lncRNA	1	1.31234
chr11	65177606	65181834	4228	-	ENSG00000254614.2	antisense	AP003068.23	OTTHUMG00000165613.2	lncRNA	2	0.473037
chr11	65487241	65488136	895	-	ENSG00000279243.1	lincRNA	CMB9-22P13.2	OTTHUMG00000189231.1	lincRNA	1	1.11732
chr11	65568482	65570423	1941	-	ENSG00000260233.3	processed_transcript	SSSCA1-AS1	OTTHUMG00000166387.2	processed_transcript	1	0.515198
chr11	65726939	65728214	1275	+	ENSG00000214659.4	processed_pseudogene	KRT8P26	OTTHUMG00000166591.1	pseudogene	1	0.784314
chr11	66067277	66069619	2342	-	ENSG00000255038.1	antisense	RP11-1167A19.2	OTTHUMG00000166666.1	lncRNA	3	1.28096
chr11	66264777	66265666	889	-	ENSG00000254855.1	antisense	RP11-867G23.1	OTTHUMG00000166905.1	lncRNA	1	1.12486
chr11	67374416	67374932	516	+	ENSG00000275484.1	lincRNA	CTC-1337H24.4	OTTHUMG00000188153.1	lincRNA	1	1.93798
chr11	67612653	67616257	3604	-	ENSG00000231793.4	unitary_pseudogene	DOC2GP	OTTHUMG00000154229.1	pseudogene	2	0.554939
chr11	69909184	69910994	1810	-	ENSG00000260348.1	lincRNA	RP11-643C9.1	OTTHUMG00000175910.1	lincRNA	1	0.552486
chr11	72351347	72353210	1863	+	ENSG00000256739.1	antisense	RP11-45F15.1	OTTHUMG00000167904.1	lncRNA	1	0.536769
chr11	73307235	73309361	2126	-	ENSG00000257038.1	antisense	RP11-800A3.7	OTTHUMG00000167970.2	lncRNA	1	0.470367
chr11	75800877	75803415	2538	-	ENSG00000254814.1	antisense	RP11-535A19.1	OTTHUMG00000165317.1	lncRNA	2	0.788022
chr11	89498748	89499198	450	-	ENSG00000255295.1	processed_pseudogene	RP11-745I13.1	OTTHUMG00000167299.1	pseudogene	1	2.22222
chr11	118433121	118435206	2085	-	ENSG00000255384.1	lincRNA	RP11-770J1.4	OTTHUMG00000166406.1	lincRNA	1	0.479616
chr11	118688039	118690600	2561	-	ENSG00000255239.1	unprocessed_pseudogene	AP002954.6	OTTHUMG00000166410.1	pseudogene	2	0.780945
chr11	118791254	118793137	1883	+	ENSG00000278376.1	lincRNA	RP11-158I9.8	OTTHUMG00000188156.1	lincRNA	2	1.06213
chr11	119065263	119065677	414	-	ENSG00000271751.1	lincRNA	RP11-110I1.14	OTTHUMG00000185714.1	lincRNA	1	2.41546
chr11	121426645	121427416	771	-	ENSG00000271022.1	processed_pseudogene	RP11-142I2.1	OTTHUMG00000184782.1	pseudogene	1	1.29702
chr11	124744634	124746337	1703	-	ENSG00000255045.1	antisense	RP11-677M14.2	OTTHUMG00000165929.1	lncRNA	1	0.587199
chr12	6537794	6538370	576	-	ENSG00000269968.1	antisense	RP5-940J5.9	OTTHUMG00000183895.1	lncRNA	1	1.73611
chr12	6964949	6965382	433	+	ENSG00000271969.1	antisense	U47924.29	OTTHUMG00000185704.1	lncRNA	1	2.30947
chr12	7129079	7131198	2119	-	ENSG00000256967.1	antisense	RP11-273B20.1	OTTHUMG00000168166.1	lncRNA	1	0.471921
chr12	9135084	9135591	507	+	ENSG00000256720.1	processed_pseudogene	BTG1P1	OTTHUMG00000168328.1	pseudogene	1	1.97239
chr12	12355406	12357067	1661	-	ENSG00000205791.3	lincRNA	LOH12CR2	OTTHUMG00000187482.1	lincRNA	1	0.602047
chr12	25210652	25211233	581	+	ENSG00000274987.1	antisense	RP11-295I5.3	OTTHUMG00000187134.1	lncRNA	1	1.72117
chr12	25385670	25386241	571	-	ENSG00000278743.1	lincRNA	RP11-707G18.1	OTTHUMG00000187136.1	lincRNA	1	1.75131
chr12	27779821	27781067	1246	-	ENSG00000256747.1	antisense	RP11-860B13.1	OTTHUMG00000169218.1	lncRNA	1	0.802568
chr12	31324316	31325829	1513	+	ENSG00000177340.5	antisense	FLJ13224	OTTHUMG00000187470.1	lncRNA	1	0.660939
chr12	46371463	46373778	2315	+	ENSG00000258096.1	antisense	RP11-474P2.2	OTTHUMG00000169472.1	lncRNA	2	0.863931
chr12	47817451	47817966	515	-	ENSG00000274737.1	sense_intronic	RP5-1057I20.6	OTTHUMG00000187387.2	lncRNA	1	1.94175
chr12	47905122	47906865	1743	+	ENSG00000278385.1	lincRNA	RP11-89H19.2	OTTHUMG00000187441.1	lincRNA	1	0.573723
chr12	48995150	48996334	1184	+	ENSG00000258283.1	antisense	RP11-386G11.3	OTTHUMG00000170404.1	lncRNA	1	0.844595
chr12	51820459	51822415	1956	-	ENSG00000261308.1	processed_pseudogene	FIGNL2	OTTHUMG00000175693.1	pseudogene	1	0.511247
chr12	53159586	53161000	1414	+	ENSG00000257808.1	lincRNA	RP11-1136G11.8	OTTHUMG00000170026.1	lincRNA	1	0.707214
chr12	53298655	53300314	1659	-	ENSG00000257605.2	antisense	RP11-680A11.5	OTTHUMG00000170029.2	lncRNA	1	0.602773
chr12	55646195	55646663	468	-	ENSG00000272837.1	unprocessed_pseudogene	OR10AE3P	OTTHUMG00000185941.1	pseudogene	1	2.13675
chr12	55729104	55730852	1748	+	ENSG00000258056.2	antisense	RP11-644F5.11	OTTHUMG00000170187.2	lncRNA	1	0.572082
chr12	56118968	56119939	971	-	ENSG00000258345.1	antisense	RP11-603J24.6	OTTHUMG00000170141.1	lncRNA	1	1.02987
chr12	56376818	56377331	513	-	ENSG00000274823.1	processed_pseudogene	RP11-348M3.6	OTTHUMG00000188037.1	pseudogene	1	1.94932
chr12	62601751	62603690	1939	-	ENSG00000221949.5	lincRNA	LINC01465	OTTHUMG00000169983.2	lincRNA	1	0.51573
chr12	66234079	66235234	1155	-	ENSG00000225422.4	processed_pseudogene	RBMS1P1	OTTHUMG00000169003.2	pseudogene	1	0.865801
chr12	67440998	67442559	1561	-	ENSG00000256172.1	lincRNA	RP11-473M14.3	OTTHUMG00000169068.1	lincRNA	1	0.640615
chr12	75333798	75334486	688	-	ENSG00000273987.1	sense_intronic	RP11-585P4.6	OTTHUMG00000187280.1	lncRNA	1	1.45349
chr12	94140077	94141337	1260	+	ENSG00000257360.1	processed_pseudogene	RP11-74K11.1	OTTHUMG00000170234.1	pseudogene	1	0.793651
chr12	96900697	96902698	2001	-	ENSG00000258846.1	processed_pseudogene	EEF1A1P33	OTTHUMG00000170603.1	pseudogene	1	0.49975
chr12	101773114	101773755	641	-	ENSG00000258230.2	transcribed_processed_pseudogene	RP11-511H9.3	OTTHUMG00000170445.2	pseudogene	1	1.56006
chr12	103503381	103504936	1555	+	ENSG00000257415.1	processed_pseudogene	RP11-626I20.1	OTTHUMG00000170053.1	pseudogene	1	0.643087
chr12	118375350	118376275	925	-	ENSG00000270482.1	lincRNA	RP11-131L12.2	OTTHUMG00000185168.1	lincRNA	1	1.08108
chr12	122501187	122501641	454	+	ENSG00000275265.1	lincRNA	RP11-15J22.8	OTTHUMG00000187270.1	lincRNA	1	2.20264
chr12	122865335	122867021	1686	+	ENSG00000256152.2	lincRNA	RP11-463O12.3	OTTHUMG00000168766.2	lincRNA	1	0.59312
chr12	130047132	130048376	1244	+	ENSG00000256298.1	lincRNA	RP11-474D1.1	OTTHUMG00000168374.1	lincRNA	1	0.803859
chr13	19563589	19564900	1311	-	ENSG00000238132.2	processed_pseudogene	CASC4P1	OTTHUMG00000016496.2	pseudogene	1	0.762777
chr13	19587118	19588350	1232	+	ENSG00000225316.1	lincRNA	LINC00350	OTTHUMG00000016497.1	lincRNA	1	0.811688
chr13	19863858	19865048	1190	+	ENSG00000275964.1	lincRNA	RP11-61K9.3	OTTHUMG00000187050.1	lincRNA	1	0.840336
chr13	27953526	27955370	1844	+	ENSG00000260704.1	lincRNA	LINC00543	OTTHUMG00000170880.1	lincRNA	2	1.0846
chr13	28136843	28138193	1350	-	ENSG00000261485.1	antisense	PAN3-AS1	OTTHUMG00000175971.1	lncRNA	1	0.740741
chr13	40992779	40993331	552	-	ENSG00000229473.2	processed_pseudogene	RGS17P1	OTTHUMG00000016782.2	pseudogene	1	1.81159
chr13	45340039	45341183	1144	+	ENSG00000273149.1	antisense	RP11-290D2.6	OTTHUMG00000186000.1	lncRNA	1	0.874126
chr13	48974967	48976867	1900	-	ENSG00000275202.1	antisense	RP11-156K23.3	OTTHUMG00000187380.1	lncRNA	2	1.05263
chr13	52454775	52455331	556	-	ENSG00000278238.1	lincRNA	RP11-245D16.4	OTTHUMG00000187321.1	lincRNA	1	1.79856
chr13	98577244	98578830	1586	+	ENSG00000224418.1	antisense	STK24-AS1	OTTHUMG00000017249.1	lncRNA	1	0.630517
chr13	102903339	102904000	661	+	ENSG00000278445.1	lincRNA	RP11-255P5.3	OTTHUMG00000187302.1	lincRNA	1	1.51286
chr13	112686769	112689815	3046	-	ENSG00000274922.1	lincRNA	RP11-88E10.5	OTTHUMG00000187192.1	lincRNA	2	0.656599
chr14	20305730	20306811	1081	+	ENSG00000258459.1	antisense	CTD-2292M16.7	OTTHUMG00000170853.1	lncRNA	1	0.925069
chr14	22556640	22559037	2397	+	ENSG00000259003.1	lincRNA	AE000662.92	OTTHUMG00000170968.2	lincRNA	2	0.834376
chr14	23293852	23295798	1946	+	ENSG00000270433.1	transcribed_unprocessed_pseudogene	RP11-124D2.7	OTTHUMG00000184412.1	pseudogene	1	0.513875
chr14	25431193	25432234	1041	-	ENSG00000257976.1	processed_pseudogene	RP11-388G3.1	OTTHUMG00000170317.1	pseudogene	1	0.960615
chr14	34874343	34876459	2116	+	ENSG00000258738.1	antisense	RP11-73E17.2	OTTHUMG00000170792.1	lncRNA	1	0.47259
chr14	48398310	48399375	1065	+	ENSG00000258750.2	processed_pseudogene	RP11-2G1.2	OTTHUMG00000170799.2	pseudogene	1	0.938967
chr14	65411170	65412690	1520	-	ENSG00000276116.2	antisense	FUT8-AS1	OTTHUMG00000186893.2	lncRNA	1	0.657895
chr14	73057925	73059415	1490	-	ENSG00000258813.2	antisense	RP11-109N23.4	OTTHUMG00000171423.2	lncRNA	1	0.671141
chr14	73539221	73539781	560	-	ENSG00000258408.1	processed_pseudogene	NT5CP2	OTTHUMG00000171604.1	pseudogene	1	1.78571
chr14	73571159	73571667	508	-	ENSG00000258524.1	processed_pseudogene	NT5CP1	OTTHUMG00000171605.1	pseudogene	1	1.9685
chr14	90697333	90699374	2041	+	ENSG00000258716.1	antisense	RP11-661G16.2	OTTHUMG00000171052.1	lncRNA	1	0.489956
chr14	95516136	95517911	1775	+	ENSG00000258572.1	lincRNA	RP11-1070N10.3	OTTHUMG00000171637.1	lincRNA	1	0.56338
chr14	96275046	96276723	1677	-	ENSG00000258729.2	lincRNA	RP11-404P21.6	OTTHUMG00000171413.1	lincRNA	1	0.596303
chr14	96500810	96502321	1511	-	ENSG00000260806.1	antisense	RP11-872J21.3	OTTHUMG00000171440.1	lncRNA	1	0.661813
chr14	101730437	101732522	2085	+	ENSG00000258512.1	lincRNA	LINC00239	OTTHUMG00000171596.1	lincRNA	1	0.479616
chr14	101843394	101844122	728	-	ENSG00000259161.2	processed_pseudogene	CTD-2017C7.3	OTTHUMG00000171643.2	pseudogene	1	1.37363
chr14	103187221	103189028	1807	-	ENSG00000251533.2	lincRNA	LINC00605	OTTHUMG00000171894.1	lincRNA	1	0.553403
chr14	104137150	104137898	748	-	ENSG00000258748.1	antisense	CTD-2223O18.1	OTTHUMG00000171595.1	lncRNA	1	1.3369
chr14	106286811	106287657	846	-	ENSG00000238275.2	processed_pseudogene	HOMER2P2	OTTHUMG00000152092.2	pseudogene	1	1.18203
chr14	106436415	106436555	140	-	ENSG00000228757.1	unprocessed_pseudogene	AB019438.66	OTTHUMG00000152076.2	pseudogene	1	7.14286
chr14	106460092	106461055	963	-	ENSG00000228966.2	processed_pseudogene	HOMER2P1	OTTHUMG00000152103.3	pseudogene	1	1.03842
chr15	39593580	39594231	651	-	ENSG00000259279.1	antisense	CTD-2033D15.1	OTTHUMG00000172463.1	lncRNA	1	1.5361
chr15	41016990	41018843	1853	-	ENSG00000280036.1	sense_intronic	RP11-540O11.8	OTTHUMG00000172520.1	lncRNA	1	0.539665
chr15	45198517	45199139	622	-	ENSG00000259932.1	sense_intronic	CTD-2651B20.7	OTTHUMG00000172833.1	lncRNA	2	3.21543
chr15	57527187	57529009	1822	-	ENSG00000261265.1	lincRNA	CTD-2515H24.4	OTTHUMG00000176408.1	lincRNA	1	0.548847
chr15	59688517	59689418	901	+	ENSG00000259238.1	antisense	RP11-361D15.2	OTTHUMG00000171925.1	lncRNA	1	1.10988
chr15	62060503	62062434	1931	+	ENSG00000259251.2	antisense	RP11-643M14.1	OTTHUMG00000171941.2	lncRNA	1	0.517866
chr15	63046034	63049387	3353	-	ENSG00000259498.1	antisense	RP11-244F12.3	OTTHUMG00000172299.1	lncRNA	2	0.596481
chr15	70635249	70637314	2065	+	ENSG00000280515.1	lincRNA	SALRNA2	OTTHUMG00000189722.1	lincRNA	1	0.484262
chr15	74303005	74304343	1338	+	ENSG00000261384.1	sense_intronic	RP11-60L3.2	OTTHUMG00000172634.1	lncRNA	1	0.747384
chr15	74374678	74375511	833	+	ENSG00000274937.1	lincRNA	CTD-2311M21.4	OTTHUMG00000186953.1	lincRNA	1	1.20048
chr15	75452964	75453947	983	-	ENSG00000276744.1	sense_intronic	CTD-2562G15.3	OTTHUMG00000186962.1	lncRNA	1	1.01729
chr15	75624793	75625690	897	+	ENSG00000260235.1	antisense	CTD-2026K11.3	OTTHUMG00000172791.1	lncRNA	1	1.11483
chr15	85415228	85415633	405	+	ENSG00000259630.2	transcribed_processed_pseudogene	CTD-2262B20.1	OTTHUMG00000172209.2	pseudogene	1	2.46914
chr15	86139838	86140240	402	-	ENSG00000261077.1	processed_pseudogene	RP11-553E24.1	OTTHUMG00000172871.1	pseudogene	1	2.48756
chr15	86914443	86916155	1712	+	ENSG00000273540.1	sense_intronic	RP11-133L19.3	OTTHUMG00000172873.1	lncRNA	1	0.584112
chr15	90932586	90935130	2544	-	ENSG00000224441.1	antisense	AC068831.3	OTTHUMG00000141259.1	lncRNA	2	0.786164
chr15	94168349	94168751	402	+	ENSG00000258570.1	processed_pseudogene	RP11-452K20.1	OTTHUMG00000171812.1	pseudogene	1	2.48756
chr16	1579242	1580308	1066	-	ENSG00000260954.1	sense_intronic	LA16c-425C2.1	OTTHUMG00000176603.1	lncRNA	1	0.938086
chr16	3003431	3005101	1670	-	ENSG00000262362.1	sense_overlapping	LA16c-380H5.2	OTTHUMG00000177449.1	lncRNA	1	0.598802
chr16	3263743	3267567	3824	+	ENSG00000281005.1	lincRNA	LINC00921	OTTHUMG00000189522.1	lincRNA	2	0.523013
chr16	19410729	19411662	933	-	ENSG00000260681.1	antisense	CTA-363E6.5	OTTHUMG00000177223.1	lncRNA	1	1.07181
chr16	21950218	21951708	1490	-	ENSG00000274460.1	processed_transcript	CTD-2649C14.2	OTTHUMG00000186800.1	processed_transcript	1	0.671141
chr16	25106569	25107102	533	-	ENSG00000275494.1	sense_intronic	RP11-266L9.8	OTTHUMG00000186826.1	lncRNA	1	1.87617
chr16	28553709	28554140	431	-	ENSG00000275441.1	antisense	RP11-666O2.2	OTTHUMG00000186839.1	lncRNA	1	2.32019
chr16	28822431	28823969	1538	-	ENSG00000275807.1	antisense	RP11-1348G14.8	OTTHUMG00000188139.1	lncRNA	1	0.650195
chr16	28862166	28863340	1174	-	ENSG00000261766.1	antisense	RP11-22P6.2	OTTHUMG00000176591.1	lncRNA	1	0.851789
chr16	29806496	29807732	1236	-	ENSG00000259952.1	antisense	AC009133.15	OTTHUMG00000177140.1	lncRNA	1	0.809061
chr16	29862760	29863417	657	+	ENSG00000278713.1	antisense	CTD-2574D22.7	OTTHUMG00000186861.1	lncRNA	2	3.04414
chr16	30615256	30615679	423	-	ENSG00000260678.1	transcribed_processed_pseudogene	RP11-146F11.4	OTTHUMG00000176952.1	pseudogene	1	2.36407
chr16	30956872	30957199	327	-	ENSG00000275263.1	lincRNA	RP11-1072A3.4	OTTHUMG00000186886.1	lincRNA	1	3.0581
chr16	31456711	31459736	3025	-	ENSG00000260267.1	antisense	RP11-452L6.5	OTTHUMG00000176617.1	lncRNA	2	0.661157
chr16	50806668	50807629	961	+	ENSG00000261703.1	lincRNA	RP11-327F22.5	OTTHUMG00000173406.1	lincRNA	1	1.04058
chr16	56609501	56611375	1874	-	ENSG00000260823.1	lincRNA	RP11-249C24.10	OTTHUMG00000176939.1	lincRNA	1	0.533618
chr16	56643705	56644786	1081	+	ENSG00000205361.8	transcribed_unprocessed_pseudogene	MT1DP	OTTHUMG00000158354.2	pseudogene	1	0.925069
chr16	57461055	57462737	1682	+	ENSG00000260345.1	processed_transcript	AC009052.12	OTTHUMG00000176595.1	processed_transcript	1	0.59453
chr16	66549280	66551189	1909	+	ENSG00000261519.3	lincRNA	RP11-403P17.4	OTTHUMG00000176438.1	lincRNA	1	0.523834
chr16	75108601	75110712	2111	-	ENSG00000247033.1	antisense	RP11-252E2.1	OTTHUMG00000176990.1	lncRNA	1	0.473709
chr16	85935281	85936223	942	-	ENSG00000268804.1	lincRNA	RP11-542M13.3	OTTHUMG00000183858.1	lincRNA	1	1.06157
chr16	87773488	87779374	5886	-	ENSG00000260498.5	lincRNA	RP4-536B24.4	OTTHUMG00000176390.1	lincRNA	3	0.509684
chr16	88696501	88698610	2109	+	ENSG00000259813.1	antisense	RP5-1142A6.5	OTTHUMG00000173416.1	lncRNA	1	0.474158
chr16	89166383	89169147	2764	+	ENSG00000205015.1	lincRNA	RP11-46C24.3	OTTHUMG00000175525.1	lincRNA	2	0.723589
chr17	2215482	2216015	533	-	ENSG00000236457.1	sense_intronic	AC130689.5	OTTHUMG00000132217.1	lncRNA	1	1.87617
chr17	4731756	4732371	615	-	ENSG00000261898.2	antisense	RP11-314A20.5	OTTHUMG00000177897.2	lncRNA	1	1.62602
chr17	5019214	5020093	879	-	ENSG00000227495.1	antisense	AC109333.10	OTTHUMG00000132924.2	lncRNA	1	1.13766
chr17	7436557	7437523	966	-	ENSG00000262624.1	antisense	RP11-104H15.9	OTTHUMG00000178213.1	lncRNA	1	1.0352
chr17	8079482	8081565	2083	+	ENSG00000214999.3	antisense	AC129492.6	OTTHUMG00000132872.1	lncRNA	1	0.480077
chr17	8220642	8224043	3401	-	ENSG00000178977.3	lincRNA	LINC00324	OTTHUMG00000132866.3	lincRNA	2	0.588062
chr17	8965896	8967070	1174	+	ENSG00000266389.1	lincRNA	CTB-41I6.1	OTTHUMG00000178278.1	lincRNA	1	0.851789
chr17	16414524	16416689	2165	-	ENSG00000264739.1	antisense	RP11-138I1.2	OTTHUMG00000179142.1	lncRNA	1	0.461894
chr17	16427474	16428719	1245	+	ENSG00000239203.1	processed_transcript	AC093484.4	OTTHUMG00000058991.1	processed_transcript	1	0.803213
chr17	16988329	16990177	1848	+	ENSG00000230969.2	lincRNA	AC104024.2	OTTHUMG00000059263.2	lincRNA	1	0.541126
chr17	20008051	20009234	1183	-	ENSG00000261033.1	antisense	RP11-209D14.2	OTTHUMG00000175977.2	lncRNA	1	0.845309
chr17	28416922	28417492	570	+	ENSG00000265541.1	unprocessed_pseudogene	H3F3BP2	OTTHUMG00000179306.1	pseudogene	1	1.75439
chr17	28848860	28849592	732	+	ENSG00000264138.1	unprocessed_pseudogene	RP11-20B24.3	OTTHUMG00000179496.1	pseudogene	2	2.73224
chr17	29591703	29592241	538	-	ENSG00000264647.1	antisense	RP11-68I3.7	OTTHUMG00000179725.1	lncRNA	1	1.85874
chr17	29639627	29640825	1198	+	ENSG00000263370.1	antisense	RP11-68I3.5	OTTHUMG00000179727.1	lncRNA	1	0.834725
chr17	32141226	32143135	1909	-	ENSG00000214708.4	antisense	AC090616.2	OTTHUMG00000132778.2	lncRNA	1	0.523834
chr17	32876759	32878637	1878	+	ENSG00000226377.1	antisense	AC084809.2	OTTHUMG00000132777.1	lncRNA	2	1.06496
chr17	34080882	34082224	1342	-	ENSG00000263485.1	sense_intronic	CTC-304I17.4	OTTHUMG00000179673.1	lncRNA	1	0.745156
chr17	37649133	37650894	1761	+	ENSG00000274244.1	lincRNA	RP11-697E22.3	OTTHUMG00000188477.1	lincRNA	1	0.567859
chr17	42546764	42548706	1942	+	ENSG00000108785.7	unprocessed_pseudogene	HSD17B1P1	OTTHUMG00000180242.1	pseudogene	1	0.514933
chr17	42679963	42682020	2057	+	ENSG00000267042.1	antisense	CTD-3193K9.4	OTTHUMG00000180642.1	lncRNA	2	0.97229
chr17	43917194	43917985	791	+	ENSG00000267496.4	lincRNA	FAM215A	OTTHUMG00000181798.1	lincRNA	1	1.26422
chr17	44328613	44331462	2849	+	ENSG00000267211.1	lincRNA	RP5-1067M6.3	OTTHUMG00000181815.1	lincRNA	2	0.702001
chr17	47946802	47948275	1473	-	ENSG00000264019.1	antisense	RP11-6N17.6	OTTHUMG00000178296.1	lncRNA	1	0.678887
chr17	50094065	50094647	582	+	ENSG00000276851.1	lincRNA	RP5-875H18.9	OTTHUMG00000186661.1	lincRNA	1	1.71821
chr17	50396438	50397888	1450	+	ENSG00000253102.1	antisense	RP1-117B12.4	OTTHUMG00000162080.3	lncRNA	1	0.689655
chr17	50693448	50695449	2001	+	ENSG00000262967.1	antisense	RP11-294J22.6	OTTHUMG00000177508.1	lncRNA	1	0.49975
chr17	54754165	54754649	484	-	ENSG00000263125.1	processed_pseudogene	ARL2BPP8	OTTHUMG00000177815.2	pseudogene	1	2.06612
chr17	56939932	56941275	1343	+	ENSG00000262298.1	antisense	RP5-1107A17.3	OTTHUMG00000178127.1	lncRNA	1	0.744602
chr17	61411751	61413280	1529	+	ENSG00000187013.4	lincRNA	C17orf82	OTTHUMG00000180077.1	lincRNA	1	0.654022
chr17	68205489	68207493	2004	+	ENSG00000274712.1	lincRNA	RP11-147L13.15	OTTHUMG00000186697.1	lincRNA	1	0.499002
chr17	74209980	74213342	3362	-	ENSG00000246731.2	antisense	MGC16275	OTTHUMG00000166017.1	lncRNA	2	0.594884
chr17	75271369	75273895	2526	+	ENSG00000263843.1	antisense	RP11-649A18.12	OTTHUMG00000179606.1	lncRNA	2	0.791766
chr17	75818815	75820055	1240	-	ENSG00000266980.1	antisense	RP11-552F3.4	OTTHUMG00000179894.1	lncRNA	1	0.806452
chr17	75876372	75879546	3174	+	ENSG00000267801.1	antisense	RP11-552F3.9	OTTHUMG00000179917.1	lncRNA	3	0.94518
chr17	81023545	81025503	1958	-	ENSG00000262098.1	lincRNA	CTD-2561B21.10	OTTHUMG00000177696.1	lincRNA	1	0.510725
chr17	81701324	81703300	1976	-	ENSG00000262049.1	antisense	RP13-1032I1.7	OTTHUMG00000178170.1	lncRNA	1	0.506073
chr17	82153430	82154815	1385	+	ENSG00000265678.1	antisense	RP11-1376P16.2	OTTHUMG00000178560.1	lncRNA	1	0.722022
chr18	832238	832469	231	+	ENSG00000266575.1	processed_pseudogene	BOLA2P1	OTTHUMG00000178360.1	pseudogene	1	4.329
chr18	5236724	5238598	1874	-	ENSG00000264575.1	lincRNA	LINC00526	OTTHUMG00000178804.1	lincRNA	1	0.533618
chr18	12091674	12093141	1467	-	ENSG00000267478.1	processed_pseudogene	RP11-815J4.5	OTTHUMG00000180684.1	pseudogene	1	0.681663
chr18	12246589	12247055	466	+	ENSG00000267663.1	processed_pseudogene	RP11-64C12.9	OTTHUMG00000180721.1	pseudogene	1	2.14592
chr18	13139780	13140489	709	-	ENSG00000267656.1	processed_pseudogene	RP11-807E13.3	OTTHUMG00000181947.1	pseudogene	1	1.41044
chr18	31942575	31944156	1581	+	ENSG00000263823.1	antisense	RP11-326K13.4	OTTHUMG00000179804.1	lncRNA	1	0.632511
chr18	51687525	51688209	684	-	ENSG00000265712.1	processed_pseudogene	RP11-440L16.1	OTTHUMG00000179696.1	pseudogene	1	1.46199
chr18	58398663	58400082	1419	-	ENSG00000267396.1	antisense	RP11-845C23.3	OTTHUMG00000179965.1	lncRNA	1	0.704722
chr18	59696459	59698111	1652	+	ENSG00000267774.2	antisense	RP11-2N1.2	OTTHUMG00000180091.2	lncRNA	1	0.605327
chr18	76256891	76258337	1446	+	ENSG00000264212.1	lincRNA	RP11-94B19.3	OTTHUMG00000179136.1	lincRNA	1	0.691563
chr19	999796	1002757	2961	-	ENSG00000266990.1	antisense	LLNLR-284B4.2	OTTHUMG00000189099.1	lncRNA	2	0.675447
chr19	1852382	1853622	1240	+	ENSG00000267125.2	antisense	CTB-31O20.6	OTTHUMG00000179993.2	lncRNA	1	0.806452
chr19	2610155	2611862	1707	-	ENSG00000267412.1	sense_intronic	CTC-265F19.2	OTTHUMG00000180437.1	lncRNA	1	0.585823
chr19	6562123	6563848	1725	-	ENSG00000269546.1	processed_pseudogene	CLIC4P2	OTTHUMG00000181833.1	pseudogene	1	0.57971
chr19	10259109	10260045	936	-	ENSG00000267105.1	antisense	CTD-2369P2.4	OTTHUMG00000180402.1	lncRNA	1	1.06838
chr19	13796574	13796933	359	-	ENSG00000267582.1	antisense	CTD-3252C9.2	OTTHUMG00000181753.1	lncRNA	1	2.78552
chr19	15124160	15126174	2014	+	ENSG00000268564.1	antisense	AC003956.1	OTTHUMG00000183208.1	lncRNA	1	0.496524
chr19	36378028	36378832	804	+	ENSG00000266973.1	antisense	CTD-3162L10.3	OTTHUMG00000180676.1	lncRNA	1	1.24378
chr19	39532412	39534422	2010	+	ENSG00000269792.1	antisense	CTB-60E11.9	OTTHUMG00000183069.1	lncRNA	1	0.497512
chr19	43553445	43555494	2049	+	ENSG00000269177.1	antisense	L34079.3	OTTHUMG00000182732.1	lncRNA	1	0.488043
chr19	45641494	45642840	1346	+	ENSG00000267757.4	processed_transcript	EML2-AS1	OTTHUMG00000182128.1	processed_transcript	1	0.742942
chr19	47863483	47865341	1858	-	ENSG00000259108.2	lincRNA	LINC01595	OTTHUMG00000170611.2	lincRNA	1	0.538213
chr19	49688853	49690573	1720	-	ENSG00000268677.1	antisense	CTB-33G10.6	OTTHUMG00000183248.1	lncRNA	1	0.581395
chr19	49808933	49809738	805	+	ENSG00000269194.1	antisense	AC006942.4	OTTHUMG00000183160.1	lncRNA	1	1.24224
chr19	50486810	50487638	828	-	ENSG00000268518.1	lincRNA	CTD-2545M3.8	OTTHUMG00000183047.1	lincRNA	1	1.20773
chr19	53512092	53512616	524	-	ENSG00000274892.1	unprocessed_pseudogene	CTB-167G5.7	OTTHUMG00000188032.1	pseudogene	1	1.9084
chr19	53772506	53773280	774	-	ENSG00000229000.1	processed_pseudogene	SEPT7P8	OTTHUMG00000060777.1	pseudogene	1	1.29199
chr19	54438665	54439544	879	-	ENSG00000267838.2	lincRNA	AC008746.12	OTTHUMG00000150514.2	lincRNA	1	1.13766
chr19	54647944	54648853	909	+	ENSG00000242856.3	transcribed_processed_pseudogene	VN1R105P	OTTHUMG00000065711.1	pseudogene	1	1.10011
chr19	55338945	55339283	338	-	ENSG00000276831.1	lincRNA	CTD-2105E13.16	OTTHUMG00000186783.1	lincRNA	1	2.95858
chr19	55670632	55672069	1437	+	ENSG00000267096.1	sense_intronic	CTD-2537I9.13	OTTHUMG00000180910.1	lncRNA	1	0.695894
chr19	55777553	55778900	1347	+	ENSG00000255238.1	processed_pseudogene	RFPL4AP1	OTTHUMG00000165451.1	pseudogene	1	0.74239
chr19	58404238	58408484	4246	-	ENSG00000232098.3	lincRNA	CTD-2619J13.14	OTTHUMG00000183534.1	lincRNA	2	0.471032
chr20	267186	268857	1671	+	ENSG00000272874.1	lincRNA	RP5-1103G7.10	OTTHUMG00000186509.1	lincRNA	1	0.598444
chr20	1117847	1118450	603	-	ENSG00000276026.1	antisense	RP4-545L17.11	OTTHUMG00000186544.1	lncRNA	1	1.65837
chr20	3888239	3888868	629	-	ENSG00000229539.1	antisense	RP11-119B16.2	OTTHUMG00000031766.1	lncRNA	1	1.58983
chr20	19212852	19213477	625	-	ENSG00000235996.1	antisense	RP11-97N19.2	OTTHUMG00000031988.1	lncRNA	1	1.6
chr20	21302731	21303704	973	-	ENSG00000275457.1	antisense	RP1-198K11.5	OTTHUMG00000186716.1	lncRNA	1	1.02775
chr20	31721507	31723409	1902	+	ENSG00000281376.1	antisense	ABALON	OTTHUMG00000189574.1	lncRNA	2	1.05152
chr20	34475924	34476474	550	-	ENSG00000181741.7	processed_pseudogene	FDX1P1	OTTHUMG00000032297.1	pseudogene	1	1.81818
chr20	34476205	34476787	582	+	ENSG00000277558.1	sense_intronic	RP3-468O1.6	OTTHUMG00000186779.1	lncRNA	1	1.71821
chr20	37095785	37097178	1393	+	ENSG00000269846.1	antisense	RP4-621N11.2	OTTHUMG00000187317.1	lncRNA	1	0.717875
chr20	38446578	38450921	4343	+	ENSG00000174365.19	processed_transcript	SNHG11	OTTHUMG00000032449.1	processed_transcript	2	0.460511
chr20	38962472	38962993	521	+	ENSG00000277581.1	sense_intronic	RP4-616B8.6	OTTHUMG00000186879.1	lncRNA	1	1.91939
chr20	44448777	44450092	1315	-	ENSG00000237907.1	antisense	LINC01430	OTTHUMG00000032534.2	lncRNA	1	0.760456
chr20	45229817	45230191	374	+	ENSG00000233352.1	unprocessed_pseudogene	RP1-300I2.3	OTTHUMG00000154638.1	pseudogene	1	2.6738
chr20	46099518	46100176	658	+	ENSG00000213820.3	processed_pseudogene	RPL13P2	OTTHUMG00000032642.1	pseudogene	1	1.51976
chr20	59515191	59516039	848	+	ENSG00000227282.1	lincRNA	RP11-164D18.2	OTTHUMG00000137386.1	lincRNA	1	1.17925
chr20	64034344	64039962	5618	+	ENSG00000196421.7	lincRNA	LINC00176	OTTHUMG00000033015.2	lincRNA	3	0.533998
chr21	33309491	33310181	690	+	ENSG00000272659.1	lincRNA	AP000295.10	OTTHUMG00000186478.2	lincRNA	1	1.44928
chr21	39313935	39314962	1027	+	ENSG00000255568.3	antisense	BRWD1-AS2	OTTHUMG00000066154.5	lncRNA	1	0.97371
chr21	46420553	46421034	481	-	ENSG00000225043.1	processed_pseudogene	RPL18AP2	OTTHUMG00000154992.1	pseudogene	1	2.079
chr22	17213516	17214155	639	+	ENSG00000203416.3	processed_pseudogene	FAM32B	OTTHUMG00000150068.2	pseudogene	1	1.56495
chr22	20110821	20111875	1054	-	ENSG00000243762.1	antisense	AC006547.8	OTTHUMG00000150489.2	lncRNA	1	0.948767
chr22	20206397	20208524	2127	+	ENSG00000236499.2	lincRNA	LINC00896	OTTHUMG00000186112.1	lincRNA	1	0.470146
chr22	22103219	22104857	1638	+	ENSG00000225741.1	unprocessed_pseudogene	LL22NC03-88E1.17	OTTHUMG00000150843.1	pseudogene	1	0.610501
chr22	22692778	22693312	534	-	ENSG00000223999.1	lincRNA	LL22NC03-102D1.18	OTTHUMG00000151209.1	lincRNA	1	1.87266
chr22	23433564	23435071	1507	+	ENSG00000234928.1	lincRNA	AP000344.3	OTTHUMG00000150668.1	lincRNA	1	0.66357
chr22	31082156	31083565	1409	-	ENSG00000273387.1	antisense	RP3-412A9.16	OTTHUMG00000186126.1	lncRNA	1	0.709723
chr22	35298838	35299541	703	-	ENSG00000273176.1	antisense	RP3-510H16.3	OTTHUMG00000186162.1	lncRNA	1	1.42248
chr22	42278188	42278846	658	+	ENSG00000273366.1	lincRNA	CTA-989H11.1	OTTHUMG00000186179.1	lincRNA	1	1.51976
chr22	46013606	46015498	1892	+	ENSG00000273145.1	lincRNA	CITF22-92A6.1	OTTHUMG00000170172.1	lincRNA	1	0.528541
chr22	46295143	46296660	1517	-	ENSG00000277232.2	lincRNA	GTSE1-AS1	OTTHUMG00000189497.1	lincRNA	1	0.659196
chr22	46761894	46762563	669	-	ENSG00000260708.1	antisense	CTA-29F11.1	OTTHUMG00000172744.1	lncRNA	1	1.49477
chrX	28659065	28659469	404	-	ENSG00000226436.1	processed_pseudogene	RP1-22N22.1	OTTHUMG00000021314.1	pseudogene	1	2.47525
chrX	41275739	41276778	1039	+	ENSG00000223714.1	lincRNA	RP5-1172N10.2	OTTHUMG00000021366.1	lincRNA	1	0.962464
chrX	47204921	47205865	944	+	ENSG00000224975.1	sense_intronic	INE1	OTTHUMG00000046428.1	lncRNA	1	1.05932
chrX	49876724	49879241	2517	-	ENSG00000234390.4	lincRNA	USP27X-AS1	OTTHUMG00000024154.2	lincRNA	2	0.794597
chrX	71491682	71492928	1246	-	ENSG00000243468.5	transcribed_processed_pseudogene	INGX	OTTHUMG00000024051.3	pseudogene	1	0.802568
chrX	85851575	85851682	107	-	ENSG00000276892.1	processed_pseudogene	RP1-93L7.4	OTTHUMG00000188095.1	pseudogene	1	9.34579
chrX	103687284	103691772	4488	+	ENSG00000231154.1	antisense	MORF4L2-AS1	OTTHUMG00000022108.2	lncRNA	3	0.668449
chrX	103917411	103919548	2137	-	ENSG00000231728.3	antisense	LL0XNC01-116E7.2	OTTHUMG00000022115.3	lncRNA	2	0.935891
chrX	123959233	123961341	2108	-	ENSG00000232412.1	lincRNA	RP1-315G1.3	OTTHUMG00000022338.2	lincRNA	1	0.474383
chrX	149649174	149650124	950	-	ENSG00000229322.1	processed_pseudogene	RP5-937E21.1	OTTHUMG00000022624.2	pseudogene	1	1.05263

## Sheet: H1-hESC
chromosome	start	end	width	strand	gene id	gene type	gene name	havana gene	biotype	CTCF count	CTCF density
chr1	2049203	2050070	867	-	ENSG00000226969.1	antisense	RP11-547D24.3	OTTHUMG00000041087.1	lncRNA	1	1.1534
chr1	3785008	3785538	530	+	ENSG00000272153.1	antisense	RP1-286D6.5	OTTHUMG00000185643.1	lncRNA	1	1.88679
chr1	6204840	6205780	940	-	ENSG00000226944.1	antisense	RP1-120G22.11	OTTHUMG00000041452.1	lncRNA	2	2.12766
chr1	6393555	6394391	836	+	ENSG00000271746.1	antisense	RP1-202O8.3	OTTHUMG00000185645.1	lncRNA	1	1.19617
chr1	7942372	7942726	354	+	ENSG00000270330.1	processed_pseudogene	RP5-892F13.2	OTTHUMG00000184257.1	pseudogene	1	2.82486
chr1	9197143	9198906	1763	-	ENSG00000281937.1	lincRNA	RP3-510D11.4	OTTHUMG00000191469.1	lincRNA	1	0.567215
chr1	9576427	9576985	558	+	ENSG00000231181.1	processed_pseudogene	RP13-15M17.1	OTTHUMG00000001323.1	pseudogene	1	1.79211
chr1	10429881	10430677	796	-	ENSG00000271989.1	antisense	RP4-736L20.3	OTTHUMG00000185648.1	lncRNA	1	1.25628
chr1	20732880	20733952	1072	+	ENSG00000233069.1	antisense	RP5-930J4.2	OTTHUMG00000002621.1	lncRNA	1	0.932836
chr1	23949016	23949383	367	-	ENSG00000230228.2	processed_pseudogene	RP11-4M23.4	OTTHUMG00000013896.2	pseudogene	1	2.7248
chr1	24961345	24963097	1752	+	ENSG00000229162.1	antisense	RP11-84D1.1	OTTHUMG00000003322.1	lncRNA	1	0.570776
chr1	25247837	25248321	484	+	ENSG00000272432.1	lincRNA	RP3-465N24.6	OTTHUMG00000185697.1	lincRNA	1	2.06612
chr1	39718028	39718595	567	+	ENSG00000225333.6	processed_pseudogene	RP1-144F13.4	OTTHUMG00000000457.4	pseudogene	1	1.76367
chr1	45303910	45305619	1709	+	ENSG00000281912.1	lincRNA	LINC01144	OTTHUMG00000189536.1	lincRNA	1	0.585138
chr1	46665910	46666375	465	-	ENSG00000233647.2	processed_pseudogene	NENFP1	OTTHUMG00000007990.2	pseudogene	1	2.15054
chr1	47179250	47180339	1089	+	ENSG00000224805.2	antisense	LINC00853	OTTHUMG00000007850.2	lncRNA	1	0.918274
chr1	47432133	47434641	2508	-	ENSG00000237424.1	antisense	FOXD2-AS1	OTTHUMG00000007949.2	lncRNA	2	0.797448
chr1	48227888	48229561	1673	-	ENSG00000272491.1	antisense	RP5-1024N4.4	OTTHUMG00000185781.1	lncRNA	1	0.597729
chr1	53291791	53292138	347	-	ENSG00000225030.1	sense_intronic	RP4-784A16.3	OTTHUMG00000008933.1	lncRNA	1	2.88184
chr1	62530636	62530873	237	+	ENSG00000270549.1	processed_pseudogene	RP11-293K19.1	OTTHUMG00000184290.1	pseudogene	1	4.21941
chr1	68161761	68163090	1329	-	ENSG00000234383.1	processed_pseudogene	CTBP2P8	OTTHUMG00000009154.1	pseudogene	1	0.752445
chr1	68282388	68282622	234	+	ENSG00000225242.2	processed_pseudogene	COX6B1P7	OTTHUMG00000009209.2	pseudogene	1	4.2735
chr1	74468195	74469543	1348	+	ENSG00000233894.1	antisense	RP4-650F12.2	OTTHUMG00000009610.1	lncRNA	1	0.74184
chr1	81557121	81557832	711	-	ENSG00000242598.1	processed_pseudogene	MED28P8	OTTHUMG00000009841.1	pseudogene	1	1.40647
chr1	86703502	86704462	960	-	ENSG00000261737.1	antisense	RP4-612B15.3	OTTHUMG00000175864.1	lncRNA	1	1.04167
chr1	91534666	91535593	927	-	ENSG00000241318.3	processed_pseudogene	WDR82P2	OTTHUMG00000010094.3	pseudogene	1	1.07875
chr1	92749175	92749330	155	-	ENSG00000234202.2	processed_pseudogene	RP11-330C7.4	OTTHUMG00000010893.2	pseudogene	1	6.45161
chr1	93847174	93848939	1765	+	ENSG00000260464.1	lincRNA	RP4-561L24.3	OTTHUMG00000175883.1	lincRNA	1	0.566572
chr1	109087971	109090858	2887	-	ENSG00000273382.1	antisense	RP5-1065J22.8	OTTHUMG00000186359.1	lncRNA	2	0.692761
chr1	110963302	110964649	1347	+	ENSG00000273010.1	antisense	RP11-96K19.5	OTTHUMG00000186361.1	lncRNA	1	0.74239
chr1	112715672	112717796	2124	+	ENSG00000261595.1	antisense	RP11-426L16.9	OTTHUMG00000176040.1	lncRNA	2	0.94162
chr1	112923423	112924337	914	+	ENSG00000229020.4	processed_pseudogene	AKR7A2P1	OTTHUMG00000012135.2	pseudogene	1	1.09409
chr1	114001433	114002235	802	-	ENSG00000270780.1	processed_pseudogene	RP4-590F24.1	OTTHUMG00000184325.1	pseudogene	1	1.24688
chr1	119886304	119886927	623	+	ENSG00000226446.1	processed_pseudogene	NOTCH2P1	OTTHUMG00000057603.1	pseudogene	1	1.60514
chr1	147840962	147842359	1397	+	ENSG00000223728.3	processed_pseudogene	RP11-314N2.2	OTTHUMG00000037548.2	pseudogene	1	0.71582
chr1	150255095	150257286	2191	-	ENSG00000276110.1	antisense	RP4-790G17.7	OTTHUMG00000185690.2	lncRNA	2	0.912825
chr1	151340648	151341966	1318	+	ENSG00000224645.1	antisense	RP11-126K1.8	OTTHUMG00000073673.1	lncRNA	1	0.758725
chr1	154480012	154481501	1489	+	ENSG00000273110.1	antisense	RP11-350G8.9	OTTHUMG00000186422.1	lncRNA	1	0.671592
chr1	154961825	154962623	798	+	ENSG00000271380.1	antisense	RP11-307C12.12	OTTHUMG00000185142.1	lncRNA	1	1.25313
chr1	155045191	155046118	927	-	ENSG00000232093.1	antisense	RP11-307C12.11	OTTHUMG00000041316.1	lncRNA	1	1.07875
chr1	156687695	156691997	4302	-	ENSG00000237588.2	lincRNA	RP11-66D17.3	OTTHUMG00000041297.2	lincRNA	4	0.9298
chr1	157073257	157074703	1446	+	ENSG00000224520.2	processed_pseudogene	KRT8P45	OTTHUMG00000041329.2	pseudogene	1	0.691563
chr1	167219831	167220512	681	-	ENSG00000272205.1	lincRNA	RP11-277B15.3	OTTHUMG00000185307.1	lincRNA	1	1.46843
chr1	178091508	178093984	2476	-	ENSG00000224687.1	lincRNA	RASAL2-AS1	OTTHUMG00000040865.1	lincRNA	2	0.807754
chr1	179447578	179448440	862	-	ENSG00000224620.2	processed_pseudogene	MEF2AP1	OTTHUMG00000035267.2	pseudogene	1	1.16009
chr1	181190471	181191149	678	-	ENSG00000225359.1	lincRNA	RP11-540K16.2	OTTHUMG00000035181.1	lincRNA	1	1.47493
chr1	201222113	201223123	1010	-	ENSG00000229821.1	antisense	RP11-567E21.3	OTTHUMG00000040658.1	lncRNA	1	0.990099
chr1	204141408	204143009	1601	+	ENSG00000230550.1	antisense	RP11-74C13.3	OTTHUMG00000036062.1	lncRNA	1	0.62461
chr1	206907619	206908229	610	+	ENSG00000226945.1	processed_pseudogene	RP11-564A8.4	OTTHUMG00000036458.1	pseudogene	1	1.63934
chr1	226331999	226333655	1656	-	ENSG00000275406.1	unprocessed_pseudogene	RP11-125A15.3	OTTHUMG00000187548.1	pseudogene	1	0.603865
chr1	227234269	227235355	1086	+	ENSG00000228729.1	processed_pseudogene	RP11-211A18.2	OTTHUMG00000037614.1	pseudogene	1	0.92081
chr1	228650241	228651379	1138	+	ENSG00000183929.7	processed_pseudogene	DUSP5P1	OTTHUMG00000037916.3	pseudogene	1	0.878735
chr1	230280312	230281893	1581	-	ENSG00000224407.1	antisense	RP5-956O18.3	OTTHUMG00000037756.1	lncRNA	1	0.632511
chr1	235104180	235104609	429	-	ENSG00000273416.1	lincRNA	RP4-597N16.4	OTTHUMG00000185835.1	lincRNA	1	2.331
chr1	244969350	244971088	1738	-	ENSG00000272195.1	antisense	RP11-156E8.1	OTTHUMG00000185820.1	lncRNA	1	0.575374
chr1	247833349	247834288	939	-	ENSG00000230576.1	unprocessed_pseudogene	OR6R1P	OTTHUMG00000040202.1	pseudogene	1	1.06496
chr1	247936061	247937513	1452	-	ENSG00000226191.3	processed_pseudogene	CLK3P2	OTTHUMG00000040208.2	pseudogene	1	0.688705
chr2	7671604	7672246	642	-	ENSG00000230515.1	lincRNA	AC092580.3	OTTHUMG00000151592.1	lincRNA	1	1.55763
chr2	12715415	12716227	812	+	ENSG00000261117.1	lincRNA	RP11-333O1.1	OTTHUMG00000175731.1	lincRNA	1	1.23153
chr2	24825610	24826717	1107	+	ENSG00000271936.1	antisense	RP11-443B20.1	OTTHUMG00000185752.1	lncRNA	1	0.903342
chr2	25856461	25856966	505	-	ENSG00000218682.1	processed_pseudogene	AC010150.1	OTTHUMG00000152174.1	pseudogene	1	1.9802
chr2	28396815	28397110	295	+	ENSG00000270640.1	sense_intronic	RP11-373D23.2	OTTHUMG00000185291.1	lncRNA	1	3.38983
chr2	38535258	38536249	991	-	ENSG00000271443.1	transcribed_processed_pseudogene	RP11-541E12.1	OTTHUMG00000184445.1	pseudogene	1	1.00908
chr2	43227210	43228855	1645	+	ENSG00000279873.2	lincRNA	LINC01126	OTTHUMG00000152397.3	lincRNA	1	0.607903
chr2	45013214	45013668	454	-	ENSG00000231156.1	lincRNA	AC093702.1	OTTHUMG00000152444.1	lincRNA	1	2.20264
chr2	55617909	55618373	464	+	ENSG00000272606.1	antisense	RP11-554J4.1	OTTHUMG00000185926.1	lncRNA	1	2.15517
chr2	64330486	64332131	1645	-	ENSG00000238012.1	lincRNA	AC114752.1	OTTHUMG00000152671.1	lincRNA	1	0.607903
chr2	70301451	70302072	621	+	ENSG00000233849.1	antisense	AC022201.5	OTTHUMG00000154180.1	lncRNA	1	1.61031
chr2	71067519	71068125	606	-	ENSG00000272735.1	lincRNA	RP11-467P9.1	OTTHUMG00000185975.1	lincRNA	2	3.30033
chr2	75598071	75598559	488	+	ENSG00000230477.1	processed_pseudogene	AC005034.2	OTTHUMG00000152943.1	pseudogene	1	2.04918
chr2	85186409	85187253	844	+	ENSG00000231134.1	sense_intronic	TCF7L1-IT1	OTTHUMG00000153211.1	lncRNA	1	1.18483
chr2	95413456	95414296	840	-	ENSG00000248821.1	unprocessed_pseudogene	AC009238.6	OTTHUMG00000155175.1	pseudogene	1	1.19048
chr2	104412227	104414008	1781	-	ENSG00000225765.1	lincRNA	AC068535.3	OTTHUMG00000153049.1	lincRNA	1	0.561482
chr2	109127327	109128930	1603	-	ENSG00000259863.1	lincRNA	SH3RF3-AS1	OTTHUMG00000153437.1	lincRNA	1	0.62383
chr2	111887914	111888741	827	+	ENSG00000236307.2	processed_pseudogene	EEF1E1P1	OTTHUMG00000153261.2	pseudogene	1	1.20919
chr2	127024252	127025723	1471	-	ENSG00000260634.1	lincRNA	RP11-521O16.1	OTTHUMG00000176160.1	lincRNA	2	1.35962
chr2	130776646	130776957	311	+	ENSG00000232503.1	processed_pseudogene	CYCSP8	OTTHUMG00000154067.1	pseudogene	1	3.21543
chr2	132037787	132037993	206	-	ENSG00000226886.1	processed_pseudogene	AC093787.1	OTTHUMG00000153595.1	pseudogene	1	4.85437
chr2	169767185	169768799	1614	-	ENSG00000231550.1	processed_pseudogene	PTCHD3P2	OTTHUMG00000154119.1	pseudogene	1	0.619579
chr2	169790093	169790885	792	+	ENSG00000214369.2	processed_pseudogene	AC009967.3	OTTHUMG00000153985.1	pseudogene	1	1.26263
chr2	171491422	171491931	509	+	ENSG00000228507.1	processed_pseudogene	DAP3P2	OTTHUMG00000154084.1	pseudogene	1	1.96464
chr2	172427774	172428603	829	-	ENSG00000226963.1	antisense	AC078883.4	OTTHUMG00000154231.1	lncRNA	1	1.20627
chr2	172464262	172466022	1760	-	ENSG00000232788.1	antisense	AC078883.3	OTTHUMG00000154089.1	lncRNA	1	0.568182
chr2	172674212	172674898	686	-	ENSG00000230104.1	processed_pseudogene	AC018712.2	OTTHUMG00000154093.1	pseudogene	2	2.91545
chr2	173431349	173431812	463	-	ENSG00000213148.3	processed_pseudogene	AC073465.1	OTTHUMG00000154105.1	pseudogene	1	2.15983
chr2	177264359	177265515	1156	+	ENSG00000222043.2	antisense	AC079305.10	OTTHUMG00000154178.1	lncRNA	1	0.865052
chr2	183071040	183072486	1446	-	ENSG00000231203.1	processed_pseudogene	KRT8P10	OTTHUMG00000154237.2	pseudogene	1	0.691563
chr2	189762704	189765556	2852	+	ENSG00000253559.1	antisense	OSGEPL1-AS1	OTTHUMG00000164097.1	lncRNA	2	0.701262
chr2	208255247	208256181	934	+	ENSG00000231908.1	antisense	IDH1-AS1	OTTHUMG00000154707.1	lncRNA	1	1.07066
chr2	208466238	208466626	388	-	ENSG00000227430.1	processed_pseudogene	AC019185.2	OTTHUMG00000154661.1	pseudogene	1	2.57732
chr2	218953401	218954050	649	-	ENSG00000224928.2	processed_pseudogene	KRT8P30	OTTHUMG00000154667.1	pseudogene	1	1.54083
chr2	222317242	222318653	1411	-	ENSG00000267034.1	lincRNA	RP11-384O8.1	OTTHUMG00000180633.1	lincRNA	1	0.708717
chr2	231452195	231453153	958	+	ENSG00000233538.1	lincRNA	AC017104.2	OTTHUMG00000153867.1	lincRNA	1	1.04384
chr2	232385750	232387457	1707	-	ENSG00000244280.1	transcribed_unprocessed_pseudogene	ECEL1P2	OTTHUMG00000153343.2	pseudogene	1	0.585823
chr2	238427077	238427729	652	-	ENSG00000229915.1	antisense	AC016999.2	OTTHUMG00000152867.1	lncRNA	1	1.53374
chr2	239401436	239402364	928	+	ENSG00000222020.2	antisense	AC062017.1	OTTHUMG00000152658.1	lncRNA	1	1.07759
chr2	241724615	241725693	1078	-	ENSG00000235351.1	antisense	AC114730.11	OTTHUMG00000151506.1	lncRNA	1	0.927644
chr3	12787393	12788671	1278	-	ENSG00000213943.3	processed_pseudogene	KRT18P17	OTTHUMG00000155395.1	pseudogene	1	0.782473
chr3	25441164	25441502	338	-	ENSG00000229421.1	processed_pseudogene	AC133141.1	OTTHUMG00000155597.2	pseudogene	1	2.95858
chr3	26015669	26016369	700	+	ENSG00000234158.1	processed_pseudogene	RPEP2	OTTHUMG00000155599.1	pseudogene	1	1.42857
chr3	26712307	26713364	1057	+	ENSG00000234165.1	lincRNA	AC114877.3	OTTHUMG00000155686.1	lincRNA	1	0.946074
chr3	43484972	43485880	908	-	ENSG00000223916.1	processed_pseudogene	RP11-353H3.1	OTTHUMG00000156492.1	pseudogene	1	1.10132
chr3	49029316	49029706	390	+	ENSG00000272434.1	antisense	RP13-131K19.6	OTTHUMG00000185526.1	lncRNA	1	2.5641
chr3	52239258	52241097	1839	+	ENSG00000243224.1	antisense	RP5-1157M23.2	OTTHUMG00000158107.1	lncRNA	2	1.08755
chr3	57078943	57080101	1158	+	ENSG00000272202.1	antisense	RP11-157F20.3	OTTHUMG00000185634.1	lncRNA	1	0.863558
chr3	62926371	62926882	511	+	ENSG00000226082.2	processed_pseudogene	RP11-24H1.1	OTTHUMG00000157308.1	pseudogene	1	1.95695
chr3	64444482	64445476	994	-	ENSG00000243993.1	lincRNA	RP11-14D22.2	OTTHUMG00000158710.1	lincRNA	1	1.00604
chr3	69535664	69536693	1029	-	ENSG00000240265.1	processed_pseudogene	RP11-62G11.1	OTTHUMG00000158768.1	pseudogene	1	0.971817
chr3	70753854	70754573	719	+	ENSG00000243873.1	processed_pseudogene	HMGB1P36	OTTHUMG00000158798.1	pseudogene	1	1.39082
chr3	109396616	109397870	1254	+	ENSG00000244561.1	processed_pseudogene	RP11-702L6.1	OTTHUMG00000159214.1	pseudogene	1	0.797448
chr3	129045763	129046921	1158	+	ENSG00000249505.1	processed_pseudogene	RP11-434H6.2	OTTHUMG00000159945.1	pseudogene	1	0.863558
chr3	131526447	131527179	732	+	ENSG00000248530.1	processed_pseudogene	BCL2L12P1	OTTHUMG00000159630.2	pseudogene	1	1.36612
chr3	136609050	136609602	552	+	ENSG00000244101.1	processed_pseudogene	HMGN1P10	OTTHUMG00000159802.1	pseudogene	1	1.81159
chr3	138101478	138102917	1439	-	ENSG00000240668.1	processed_pseudogene	KRT8P36	OTTHUMG00000159822.1	pseudogene	1	0.694927
chr3	140972744	140973255	511	+	ENSG00000248773.1	sense_intronic	RP11-231L11.3	OTTHUMG00000160261.1	lncRNA	1	1.95695
chr3	146589602	146590325	723	+	ENSG00000241457.1	antisense	PLSCR5-AS1	OTTHUMG00000159436.1	lncRNA	1	1.38313
chr3	150238519	150240209	1690	+	ENSG00000244541.5	lincRNA	LINC01213	OTTHUMG00000159737.1	lincRNA	1	0.591716
chr3	170062244	170062951	707	+	ENSG00000242583.1	processed_pseudogene	RP11-379K17.9	OTTHUMG00000158778.1	pseudogene	1	1.41443
chr3	170495627	170496636	1009	+	ENSG00000241416.1	processed_pseudogene	KRT8P13	OTTHUMG00000158860.1	pseudogene	1	0.99108
chr3	179649494	179650200	706	-	ENSG00000243977.1	processed_pseudogene	RP11-473P24.2	OTTHUMG00000157785.1	pseudogene	1	1.41643
chr3	184149704	184150435	731	+	ENSG00000228205.1	processed_pseudogene	RP11-778D9.4	OTTHUMG00000156842.1	pseudogene	1	1.36799
chr3	192515022	192516573	1551	+	ENSG00000230126.1	antisense	FGF12-AS2	OTTHUMG00000156143.1	lncRNA	1	0.644745
chr3	195094588	195096057	1469	+	ENSG00000233303.1	antisense	XXYLT1-AS1	OTTHUMG00000155917.1	lncRNA	1	0.680735
chr3	196631498	196632587	1089	-	ENSG00000232065.1	antisense	LINC01063	OTTHUMG00000155570.1	lncRNA	1	0.918274
chr4	3323977	3324762	785	-	ENSG00000248843.1	processed_pseudogene	RP11-357G3.1	OTTHUMG00000157427.1	pseudogene	1	1.27389
chr4	6687448	6690519	3071	-	ENSG00000246526.2	lincRNA	RP11-539L10.2	OTTHUMG00000160124.2	lincRNA	2	0.651254
chr4	25504997	25506675	1678	+	ENSG00000248608.2	processed_pseudogene	RP11-206P5.2	OTTHUMG00000160586.2	pseudogene	1	0.595948
chr4	26859806	26860599	793	-	ENSG00000240005.5	antisense	RP11-293A21.1	OTTHUMG00000159680.2	lncRNA	1	1.26103
chr4	39133913	39135608	1695	+	ENSG00000249685.1	lincRNA	RP11-360F5.3	OTTHUMG00000160465.1	lincRNA	1	0.589971
chr4	73944011	73944324	313	-	ENSG00000250339.2	processed_pseudogene	CXCL1P	OTTHUMG00000160868.2	pseudogene	1	3.19489
chr4	76756960	76758474	1514	-	ENSG00000233860.1	antisense	RP11-359D14.2	OTTHUMG00000157074.3	lncRNA	1	0.660502
chr4	82275071	82276600	1529	+	ENSG00000234568.3	processed_pseudogene	BIN2P1	OTTHUMG00000160953.1	pseudogene	1	0.654022
chr4	84244003	84245488	1485	+	ENSG00000214980.4	processed_pseudogene	RP11-274J2.1	OTTHUMG00000160895.1	pseudogene	1	0.673401
chr4	112564988	112565398	410	+	ENSG00000250966.2	processed_pseudogene	RP11-402J6.3	OTTHUMG00000161133.2	pseudogene	1	2.43902
chr4	126106139	126106923	784	-	ENSG00000251005.1	processed_pseudogene	RP11-318I4.2	OTTHUMG00000161148.1	pseudogene	1	1.27551
chr4	128069014	128069612	598	-	ENSG00000241651.4	processed_pseudogene	RP11-214O14.1	OTTHUMG00000157552.2	pseudogene	1	1.67224
chr4	135371177	135371924	747	-	ENSG00000250834.1	processed_pseudogene	KRT18P54	OTTHUMG00000161222.1	pseudogene	1	1.33869
chr4	138560704	138561941	1237	+	ENSG00000248795.1	processed_pseudogene	RP11-173E2.1	OTTHUMG00000161280.1	pseudogene	1	0.808407
chr4	140756528	140757921	1393	+	ENSG00000273472.1	lincRNA	RP11-102N12.3	OTTHUMG00000186399.1	lincRNA	1	0.717875
chr4	144572238	144572983	745	+	ENSG00000250504.2	processed_pseudogene	KRT18P51	OTTHUMG00000161431.2	pseudogene	1	1.34228
chr4	146241806	146243669	1863	+	ENSG00000251010.1	antisense	RP11-6L6.7	OTTHUMG00000162030.1	lncRNA	2	1.07354
chr4	155206529	155209027	2498	-	ENSG00000250538.5	antisense	RP11-92A5.2	OTTHUMG00000161487.1	lncRNA	2	0.800641
chr4	157204462	157204855	393	-	ENSG00000249819.1	processed_pseudogene	RP11-392C20.1	OTTHUMG00000161953.1	pseudogene	1	2.54453
chr4	165016887	165017433	546	+	ENSG00000276623.1	processed_pseudogene	RP11-366M4.19	OTTHUMG00000187585.1	pseudogene	1	1.8315
chr4	184471924	184472609	685	-	ENSG00000270426.1	sense_intronic	RP11-326I11.5	OTTHUMG00000185263.1	lncRNA	1	1.45985
chr4	185471516	185472263	747	+	ENSG00000249679.1	antisense	RP11-279O9.4	OTTHUMG00000160454.1	lncRNA	1	1.33869
chr5	195778	196341	563	+	ENSG00000261434.1	sense_overlapping	CTD-2083E4.7	OTTHUMG00000175446.1	lncRNA	1	1.7762
chr5	441498	443160	1662	-	ENSG00000221990.4	antisense	EXOC3-AS1	OTTHUMG00000162235.1	lncRNA	1	0.601685
chr5	10441290	10441792	502	-	ENSG00000250600.1	antisense	ROPN1L-AS1	OTTHUMG00000162052.1	lncRNA	1	1.99203
chr5	10627260	10628225	965	-	ENSG00000250106.1	antisense	ANKRD33B-AS1	OTTHUMG00000162124.1	lncRNA	1	1.03627
chr5	14639426	14641018	1592	-	ENSG00000250526.1	processed_pseudogene	CCT6P2	OTTHUMG00000161827.3	pseudogene	1	0.628141
chr5	17620533	17620939	406	-	ENSG00000250351.1	processed_pseudogene	RP11-432M8.10	OTTHUMG00000161841.1	pseudogene	1	2.46305
chr5	17670168	17670571	403	-	ENSG00000250715.1	processed_pseudogene	RP11-432M8.19	OTTHUMG00000161846.1	pseudogene	1	2.48139
chr5	29001760	29003357	1597	+	ENSG00000249226.1	processed_pseudogene	SUCLG2P4	OTTHUMG00000160376.1	pseudogene	1	0.626174
chr5	31747644	31748078	434	-	ENSG00000250164.1	lincRNA	RP11-5N11.6	OTTHUMG00000162519.1	lincRNA	1	2.30415
chr5	33997044	33997724	680	-	ENSG00000250767.1	processed_pseudogene	RP11-1084J3.3	OTTHUMG00000162528.1	pseudogene	1	1.47059
chr5	34837549	34839278	1729	-	ENSG00000272323.1	antisense	CTD-2517O10.6	OTTHUMG00000185459.1	lncRNA	1	0.578369
chr5	43231812	43233173	1361	-	ENSG00000247763.2	processed_pseudogene	RP11-447H19.1	OTTHUMG00000162228.2	pseudogene	1	0.734754
chr5	66144156	66144795	639	-	ENSG00000253744.1	antisense	AC025442.3	OTTHUMG00000164088.1	lncRNA	1	1.56495
chr5	71475761	71476316	555	-	ENSG00000253536.1	processed_pseudogene	RP11-1174L13.2	OTTHUMG00000163655.1	pseudogene	1	1.8018
chr5	73152416	73152938	522	-	ENSG00000250747.1	processed_pseudogene	RP11-232L2.1	OTTHUMG00000162493.1	pseudogene	1	1.91571
chr5	78222184	78222517	333	+	ENSG00000249372.1	processed_pseudogene	ATP6V1G1P6	OTTHUMG00000162480.1	pseudogene	1	3.003
chr5	88602780	88603117	337	+	ENSG00000250705.1	processed_pseudogene	CTC-470C15.1	OTTHUMG00000162633.1	pseudogene	1	2.96736
chr5	95834424	95835046	622	-	ENSG00000251000.1	processed_pseudogene	AC008592.3	OTTHUMG00000162736.1	pseudogene	1	1.60772
chr5	112419583	112420978	1395	+	ENSG00000278921.2	lincRNA	EPB41L4A-AS2	OTTHUMG00000169519.1	lincRNA	1	0.716846
chr5	115770586	115770989	403	+	ENSG00000251118.1	processed_pseudogene	CTC-505O3.1	OTTHUMG00000162915.2	pseudogene	1	2.48139
chr5	134005147	134005562	415	+	ENSG00000271737.1	lincRNA	CTB-113I20.2	OTTHUMG00000185563.1	lincRNA	1	2.40964
chr5	134226410	134227827	1417	+	ENSG00000270177.1	lincRNA	CTD-2410N18.3	OTTHUMG00000184010.1	lincRNA	2	1.41143
chr5	139775305	139775472	167	+	ENSG00000271792.1	lincRNA	CTB-35F21.5	OTTHUMG00000185580.1	lincRNA	1	5.98802
chr5	140875346	140875922	576	-	ENSG00000278915.1	antisense	AC005609.18	OTTHUMG00000189138.1	lncRNA	2	3.47222
chr5	141350109	141350662	553	-	ENSG00000280026.1	antisense	AC005618.8	OTTHUMG00000189141.1	lncRNA	1	1.80832
chr5	142317620	142318322	702	-	ENSG00000281881.1	lincRNA	SPRY4-IT1	OTTHUMG00000189512.1	lincRNA	1	1.4245
chr5	146706381	146707600	1219	-	ENSG00000248568.1	processed_pseudogene	KRT8P48	OTTHUMG00000163409.1	pseudogene	1	0.820345
chr5	147887112	147887704	592	+	ENSG00000251320.1	antisense	CTC-327F10.4	OTTHUMG00000163419.1	lncRNA	1	1.68919
chr5	149430286	149432834	2548	+	ENSG00000269936.3	lincRNA	RP11-394O4.5	OTTHUMG00000184101.1	lincRNA	2	0.784929
chr5	151319422	151319776	354	+	ENSG00000270904.1	processed_pseudogene	CTC-224D3.1	OTTHUMG00000184553.1	pseudogene	1	2.82486
chr5	159950493	159951498	1005	-	ENSG00000248626.1	processed_pseudogene	GAPDHP40	OTTHUMG00000159985.1	pseudogene	1	0.995025
chr5	173144162	173145039	877	-	ENSG00000253172.1	antisense	CTC-209H22.3	OTTHUMG00000163320.1	lncRNA	2	2.2805
chr5	174923090	174923945	855	+	ENSG00000251122.1	processed_pseudogene	NIFKP2	OTTHUMG00000163127.1	pseudogene	1	1.16959
chr5	177494995	177503647	8652	+	ENSG00000248996.1	antisense	RP11-1334A24.6	OTTHUMG00000163398.1	lncRNA	5	0.577901
chr5	180784782	180787869	3087	-	ENSG00000260841.1	sense_overlapping	CTC-205M6.5	OTTHUMG00000173461.1	lncRNA	2	0.647878
chr6	524171	525581	1410	+	ENSG00000230433.1	antisense	RP1-20B11.2	OTTHUMG00000014117.2	lncRNA	1	0.70922
chr6	2910613	2912113	1500	-	ENSG00000232999.1	unitary_pseudogene	RP1-90J20.10	OTTHUMG00000155040.1	pseudogene	1	0.666667
chr6	2987967	2991173	3206	+	ENSG00000244041.7	lincRNA	LINC01011	OTTHUMG00000014128.5	lincRNA	2	0.62383
chr6	3068045	3068894	849	-	ENSG00000272277.1	antisense	RP1-40E16.12	OTTHUMG00000185651.1	lncRNA	1	1.17786
chr6	3978062	3979099	1037	+	ENSG00000216657.1	processed_pseudogene	GLRX3P2	OTTHUMG00000014155.1	pseudogene	1	0.96432
chr6	6758276	6759291	1015	-	ENSG00000224532.2	lincRNA	RP3-470L22.1	OTTHUMG00000014193.2	lincRNA	1	0.985222
chr6	7338839	7339568	729	-	ENSG00000220472.1	processed_pseudogene	RP11-69L16.5	OTTHUMG00000014205.1	pseudogene	1	1.37174
chr6	15247815	15248634	819	-	ENSG00000235488.1	antisense	JARID2-AS1	OTTHUMG00000014292.1	lncRNA	1	1.221
chr6	16761138	16762652	1514	+	ENSG00000229931.1	antisense	RP1-151F17.1	OTTHUMG00000153136.1	lncRNA	2	1.321
chr6	17706257	17707344	1087	+	ENSG00000272269.1	antisense	RP11-500C11.3	OTTHUMG00000185678.1	lncRNA	1	0.919963
chr6	21522476	21523772	1296	-	ENSG00000231754.1	lincRNA	RP11-204E9.1	OTTHUMG00000014342.1	lincRNA	1	0.771605
chr6	25732497	25732827	330	+	ENSG00000216436.2	processed_pseudogene	HIST1H2APS1	OTTHUMG00000014405.2	pseudogene	1	3.0303
chr6	25882026	25882395	369	-	ENSG00000242387.1	transcribed_processed_pseudogene	HIST1H2APS2	OTTHUMG00000187599.1	pseudogene	1	2.71003
chr6	26321876	26322292	416	-	ENSG00000220875.1	processed_pseudogene	HIST1H3PS1	OTTHUMG00000014455.1	pseudogene	1	2.40385
chr6	28837869	28839006	1137	-	ENSG00000225173.1	lincRNA	XXbac-BPG308K3.5	OTTHUMG00000084883.1	lincRNA	1	0.879507
chr6	28969130	28970460	1330	-	ENSG00000228666.1	processed_pseudogene	KRT18P1	OTTHUMG00000031205.2	pseudogene	1	0.75188
chr6	29071824	29072599	775	-	ENSG00000236909.1	unprocessed_pseudogene	OR2P1P	OTTHUMG00000031042.3	pseudogene	1	1.29032
chr6	29553219	29554166	947	+	ENSG00000237988.3	unprocessed_pseudogene	OR2I1P	OTTHUMG00000031230.2	pseudogene	1	1.05597
chr6	29791753	29792750	997	-	ENSG00000176998.4	unprocessed_pseudogene	HCG4	OTTHUMG00000035423.2	pseudogene	1	1.00301
chr6	32970232	32970886	654	+	ENSG00000223837.2	sense_intronic	BRD2-IT1	OTTHUMG00000140321.2	lncRNA	1	1.52905
chr6	34189780	34191079	1299	+	ENSG00000271231.1	processed_pseudogene	KRT18P9	OTTHUMG00000184543.1	pseudogene	1	0.769823
chr6	67933485	67934682	1197	+	ENSG00000270509.1	processed_pseudogene	RP11-301G19.2	OTTHUMG00000184409.1	pseudogene	1	0.835422
chr6	72522641	72523238	597	+	ENSG00000217483.1	processed_pseudogene	RP11-135M8__A.1	OTTHUMG00000015011.1	pseudogene	1	1.67504
chr6	79233718	79236797	3079	+	ENSG00000270362.1	antisense	HMGN3-AS1	OTTHUMG00000185118.1	lncRNA	2	0.649562
chr6	105302453	105302823	370	-	ENSG00000219902.1	processed_pseudogene	RPL35P3	OTTHUMG00000015294.1	pseudogene	1	2.7027
chr6	109382795	109383666	871	+	ENSG00000260273.1	antisense	RP11-425D10.10	OTTHUMG00000175937.1	lncRNA	1	1.14811
chr6	137705423	137707201	1778	-	ENSG00000220412.1	processed_pseudogene	RP11-95M15.2	OTTHUMG00000015660.1	pseudogene	1	0.56243
chr6	138402585	138403560	975	-	ENSG00000215878.3	processed_pseudogene	MARCKSL1P2	OTTHUMG00000015672.2	pseudogene	1	1.02564
chr6	144036618	144037704	1086	+	ENSG00000217231.2	processed_pseudogene	RP3-340H11.2	OTTHUMG00000015735.3	pseudogene	1	0.92081
chr6	147406889	147408281	1392	+	ENSG00000220494.4	processed_pseudogene	YAP1P1	OTTHUMG00000015765.2	pseudogene	1	0.718391
chr6	152898047	152899280	1233	+	ENSG00000217372.2	processed_pseudogene	TUBB4BP7	OTTHUMG00000015853.2	pseudogene	1	0.81103
chr6	155380511	155381183	672	-	ENSG00000232529.1	lincRNA	RP1-257I9.2	OTTHUMG00000015884.1	lincRNA	1	1.4881
chr6	156662050	156662437	387	+	ENSG00000220347.1	processed_pseudogene	RP11-230C9.1	OTTHUMG00000015886.1	pseudogene	1	2.58398
chr6	164346489	164348644	2155	-	ENSG00000226739.1	lincRNA	RP11-347L18.1	OTTHUMG00000015981.1	lincRNA	2	0.928074
chr6	166275462	166277077	1615	-	ENSG00000280850.1	lincRNA	RP4-655C5.9	OTTHUMG00000190284.1	lincRNA	1	0.619195
chr6	168225279	168226517	1238	-	ENSG00000237987.1	lincRNA	RP11-503C24.2	OTTHUMG00000016041.1	lincRNA	1	0.807754
chr7	5556731	5557245	514	+	ENSG00000272719.1	antisense	CTB-161C1.1	OTTHUMG00000186133.1	lncRNA	1	1.94553
chr7	12685637	12686033	396	+	ENSG00000271253.1	processed_pseudogene	CTD-2320J21.1	OTTHUMG00000184480.1	pseudogene	1	2.52525
chr7	22725395	22727620	2225	-	ENSG00000179428.2	antisense	AC073072.5	OTTHUMG00000152547.1	lncRNA	2	0.898876
chr7	27048169	27048628	459	+	ENSG00000213786.3	processed_pseudogene	NHP2P2	OTTHUMG00000033542.2	pseudogene	1	2.17865
chr7	28615097	28615888	791	-	ENSG00000225286.1	processed_pseudogene	AC005105.2	OTTHUMG00000152816.1	pseudogene	1	1.26422
chr7	28957667	28959345	1678	+	ENSG00000228421.2	lincRNA	AC005013.5	OTTHUMG00000152794.3	lincRNA	1	0.595948
chr7	39609610	39610290	680	-	ENSG00000231951.1	antisense	AC004837.4	OTTHUMG00000155272.1	lncRNA	1	1.47059
chr7	39609717	39610280	563	+	ENSG00000106540.4	processed_pseudogene	AC004837.3	OTTHUMG00000155283.1	pseudogene	1	1.7762
chr7	45391626	45392205	579	-	ENSG00000234359.3	processed_pseudogene	ELK1P1	OTTHUMG00000159177.1	pseudogene	1	1.72712
chr7	55593777	55595006	1229	+	ENSG00000231394.1	lincRNA	RP11-310H4.3	OTTHUMG00000156122.1	lincRNA	1	0.81367
chr7	105013425	105014321	896	-	ENSG00000239569.3	antisense	KMT2E-AS1	OTTHUMG00000157280.1	lncRNA	1	1.11607
chr7	107742817	107744581	1764	-	ENSG00000241764.3	antisense	AC002467.7	OTTHUMG00000154805.3	lncRNA	1	0.566893
chr7	121398452	121398767	315	+	ENSG00000213310.3	processed_pseudogene	CYCSP19	OTTHUMG00000157004.1	pseudogene	1	3.1746
chr7	131753746	131754252	506	-	ENSG00000236281.1	processed_pseudogene	AC093106.5	OTTHUMG00000155054.1	pseudogene	1	1.97628
chr7	135168403	135169547	1144	+	ENSG00000272941.1	antisense	RP11-134L10.1	OTTHUMG00000186343.1	lncRNA	1	0.874126
chr7	141351977	141352768	791	+	ENSG00000261624.1	processed_pseudogene	RP5-914M6.1	OTTHUMG00000172760.1	pseudogene	1	1.26422
chr7	143379692	143380495	803	-	ENSG00000232533.1	antisense	AC093673.5	OTTHUMG00000152694.1	lncRNA	1	1.24533
chr7	144118461	144119360	899	-	ENSG00000239981.1	unprocessed_pseudogene	OR2A15P	OTTHUMG00000157999.1	pseudogene	1	1.11235
chr7	144142009	144142938	929	+	ENSG00000273234.1	unprocessed_pseudogene	OR2A13P	OTTHUMG00000154312.1	pseudogene	1	1.07643
chr7	151028781	151029754	973	-	ENSG00000243433.1	antisense	RP11-148K1.10	OTTHUMG00000158684.1	lncRNA	1	1.02775
chr7	155295918	155297541	1623	-	ENSG00000273117.1	lincRNA	AC144652.1	OTTHUMG00000186379.1	lincRNA	1	0.616143
chr7	157739010	157740456	1446	-	ENSG00000231515.1	sense_intronic	AC006003.3	OTTHUMG00000153023.1	lncRNA	1	0.691563
chr8	11553224	11554207	983	-	ENSG00000254774.1	antisense	RP11-148O21.3	OTTHUMG00000165415.1	lncRNA	1	1.01729
chr8	18387108	18387777	669	-	ENSG00000271654.1	processed_pseudogene	RP11-685B14.3	OTTHUMG00000184844.1	pseudogene	1	1.49477
chr8	24956621	24957110	489	+	ENSG00000272157.1	antisense	CTD-2168K21.2	OTTHUMG00000185425.1	lncRNA	1	2.04499
chr8	30082758	30083467	709	+	ENSG00000272256.1	antisense	RP11-489E7.4	OTTHUMG00000185429.1	lncRNA	1	1.41044
chr8	31497423	31498612	1189	+	ENSG00000253275.1	lincRNA	RP11-566H8.1	OTTHUMG00000163914.1	lincRNA	1	0.841043
chr8	38400536	38401683	1147	-	ENSG00000254981.1	antisense	RP11-350N15.3	OTTHUMG00000165098.1	lncRNA	1	0.87184
chr8	41511240	41512521	1281	+	ENSG00000253943.1	processed_pseudogene	KRT18P37	OTTHUMG00000164078.1	pseudogene	1	0.78064
chr8	41828165	41829934	1769	-	ENSG00000260588.1	lincRNA	RP11-930P14.2	OTTHUMG00000164085.2	lincRNA	2	1.13058
chr8	42151772	42152763	991	-	ENSG00000261449.1	antisense	RP11-589C21.5	OTTHUMG00000173375.1	lncRNA	2	2.01816
chr8	47511034	47512141	1107	-	ENSG00000253330.1	processed_pseudogene	RP11-697N18.3	OTTHUMG00000164177.1	pseudogene	1	0.903342
chr8	56074592	56075274	682	+	ENSG00000253603.1	antisense	CTA-397H3.3	OTTHUMG00000164298.1	lncRNA	1	1.46628
chr8	56101199	56102267	1068	-	ENSG00000248578.1	processed_pseudogene	NPM1P21	OTTHUMG00000160268.1	pseudogene	1	0.93633
chr8	61202350	61203220	870	+	ENSG00000213881.3	processed_pseudogene	NPM1P6	OTTHUMG00000164349.1	pseudogene	1	1.14943
chr8	74804287	74804811	524	-	ENSG00000253777.1	processed_pseudogene	RP11-758M4.3	OTTHUMG00000164515.2	pseudogene	1	1.9084
chr8	80032724	80033300	576	-	ENSG00000272264.1	lincRNA	RP11-92K15.3	OTTHUMG00000185496.1	lincRNA	1	1.73611
chr8	81279871	81281446	1575	-	ENSG00000254027.1	antisense	RP11-363E6.3	OTTHUMG00000164598.1	lncRNA	2	1.26984
chr8	86481754	86483002	1248	-	ENSG00000250569.1	processed_pseudogene	NTAN1P2	OTTHUMG00000160478.1	pseudogene	1	0.801282
chr8	97788210	97788357	147	-	ENSG00000270682.1	processed_pseudogene	KB-1907C4.2	OTTHUMG00000184717.1	pseudogene	1	6.80272
chr8	99233048	99234459	1411	-	ENSG00000236583.1	processed_pseudogene	AP004290.1	OTTHUMG00000140386.1	pseudogene	1	0.708717
chr8	99340305	99341761	1456	-	ENSG00000237704.1	processed_pseudogene	AP004289.2	OTTHUMG00000140384.1	pseudogene	1	0.686813
chr8	101223941	101224573	632	-	ENSG00000253942.1	processed_pseudogene	KB-1410C5.1	OTTHUMG00000164824.1	pseudogene	1	1.58228
chr8	104990308	104990692	384	-	ENSG00000253997.1	processed_pseudogene	RP11-200A13.3	OTTHUMG00000164815.1	pseudogene	1	2.60417
chr8	109973943	109974781	838	+	ENSG00000255402.1	antisense	RP11-696P8.2	OTTHUMG00000165638.1	lncRNA	1	1.19332
chr8	122779971	122780830	859	-	ENSG00000272384.1	lincRNA	RP11-44N11.2	OTTHUMG00000185333.1	lincRNA	1	1.16414
chr8	123924759	123925933	1174	-	ENSG00000254000.1	lincRNA	RP11-245A18.1	OTTHUMG00000164999.1	lincRNA	1	0.851789
chr8	124996985	124998198	1213	-	ENSG00000253513.1	antisense	RP11-6D1.3	OTTHUMG00000164989.1	lncRNA	1	0.824402
chr8	127400399	127402150	1751	+	ENSG00000280997.1	lincRNA	CCAT2	OTTHUMG00000189734.1	lincRNA	1	0.571102
chr8	129728744	129730445	1701	+	ENSG00000224110.3	processed_pseudogene	MTRF1LP2	OTTHUMG00000160430.1	pseudogene	1	0.587889
chr8	143280161	143281690	1529	-	ENSG00000253716.5	antisense	LINC01604	OTTHUMG00000164976.1	lncRNA	1	0.654022
chr8	144078002	144079265	1263	-	ENSG00000255224.1	antisense	CTD-3065J16.9	OTTHUMG00000165436.1	lncRNA	1	0.791766
chr8	144409492	144409976	484	+	ENSG00000272115.1	antisense	GS1-393G12.14	OTTHUMG00000185629.1	lncRNA	2	4.13223
chr8	144463817	144465101	1284	+	ENSG00000254578.1	antisense	CTD-2517M22.16	OTTHUMG00000165651.1	lncRNA	1	0.778816
chr9	15055057	15056052	995	+	ENSG00000234297.2	processed_pseudogene	RP11-54D18.4	OTTHUMG00000019580.2	pseudogene	1	1.00503
chr9	21394888	21396346	1458	-	ENSG00000261696.1	lincRNA	RP11-354P17.15	OTTHUMG00000175506.1	lincRNA	1	0.685871
chr9	21403081	21403651	570	+	ENSG00000235108.1	unprocessed_pseudogene	IFNA12P	OTTHUMG00000019678.1	pseudogene	1	1.75439
chr9	21455484	21456049	565	+	ENSG00000238271.2	unprocessed_pseudogene	IFNWP19	OTTHUMG00000019680.2	pseudogene	1	1.76991
chr9	21695176	21696943	1767	+	ENSG00000229835.2	processed_pseudogene	KHSRPP1	OTTHUMG00000019683.2	pseudogene	1	0.565931
chr9	30773464	30774732	1268	+	ENSG00000235626.2	processed_pseudogene	KRT18P66	OTTHUMG00000019729.1	pseudogene	1	0.788644
chr9	32333457	32334354	897	-	ENSG00000225347.1	processed_pseudogene	SLC25A5P8	OTTHUMG00000019739.1	pseudogene	1	1.11483
chr9	33719690	33722555	2865	+	ENSG00000227301.1	lincRNA	RP11-384P7.5	OTTHUMG00000000412.1	lincRNA	3	1.04712
chr9	34191555	34191881	326	+	ENSG00000227383.1	processed_pseudogene	RP11-571F15.2	OTTHUMG00000019811.2	pseudogene	1	3.06748
chr9	34318407	34319655	1248	+	ENSG00000229207.1	processed_pseudogene	SERPINH1P1	OTTHUMG00000000429.2	pseudogene	1	0.801282
chr9	35096378	35098141	1763	+	ENSG00000234181.1	antisense	RP11-182N22.8	OTTHUMG00000019849.1	lncRNA	1	0.567215
chr9	35646270	35647099	829	+	ENSG00000227933.1	antisense	RP11-331F9.4	OTTHUMG00000019866.1	lncRNA	2	2.41255
chr9	35756712	35757940	1228	-	ENSG00000228843.2	antisense	RP11-112J3.15	OTTHUMG00000019883.2	lncRNA	1	0.814332
chr9	35859062	35859983	921	-	ENSG00000236083.1	unitary_pseudogene	OR13E1P	OTTHUMG00000019877.1	pseudogene	1	1.08578
chr9	69428248	69428721	473	-	ENSG00000243888.1	3prime_overlapping_ncrna	RP11-548B3.3	OTTHUMG00000019980.1	lncRNA	1	2.11416
chr9	69672749	69673713	964	+	ENSG00000261447.1	lincRNA	RP11-109D9.4	OTTHUMG00000175664.1	lincRNA	1	1.03734
chr9	76419934	76420631	697	+	ENSG00000233814.1	processed_pseudogene	RP11-66C24.1	OTTHUMG00000020042.1	pseudogene	1	1.43472
chr9	77176756	77177994	1238	-	ENSG00000232998.1	antisense	VPS13A-AS1	OTTHUMG00000020054.1	lncRNA	1	0.807754
chr9	86414282	86414570	288	+	ENSG00000235819.1	lincRNA	RP11-359J6.1	OTTHUMG00000020138.1	lincRNA	1	3.47222
chr9	91426238	91427144	906	+	ENSG00000233081.1	lincRNA	RP11-440G5.2	OTTHUMG00000020208.1	lincRNA	1	1.10375
chr9	99183373	99184891	1518	+	ENSG00000227269.1	lincRNA	RP11-96L7.2	OTTHUMG00000020352.1	lincRNA	1	0.658762
chr9	128392007	128393510	1503	-	ENSG00000207955.3	lincRNA	MIR219A2	OTTHUMG00000185897.2	lincRNA	1	0.665336
chr9	132768965	132770212	1247	-	ENSG00000224992.2	sense_intronic	RP11-295G24.5	OTTHUMG00000020846.2	lncRNA	1	0.801925
chr9	135343249	135346562	3313	+	ENSG00000178243.4	lincRNA	C9orf62	OTTHUMG00000020900.2	lincRNA	2	0.603682
chr9	136483495	136486067	2572	+	ENSG00000196366.3	lincRNA	C9orf163	OTTHUMG00000131725.1	lincRNA	2	0.777605
chr9	137063535	137064581	1046	+	ENSG00000231864.2	antisense	RP11-229P13.23	OTTHUMG00000020975.2	lncRNA	1	0.956023
chr9	137286112	137287236	1124	+	ENSG00000270259.2	processed_pseudogene	RP13-122B23.9	OTTHUMG00000184711.2	pseudogene	1	0.88968
chr10	8052242	8053449	1207	-	ENSG00000243350.1	lincRNA	RP11-379F12.3	OTTHUMG00000017641.1	lincRNA	1	0.8285
chr10	8513687	8515106	1419	-	ENSG00000213771.3	processed_pseudogene	KRT8P37	OTTHUMG00000017647.1	pseudogene	1	0.704722
chr10	19489101	19489400	299	+	ENSG00000239539.1	processed_pseudogene	HMGN1P20	OTTHUMG00000017774.1	pseudogene	1	3.34448
chr10	43420738	43422100	1362	+	ENSG00000230555.2	lincRNA	RP11-517P14.2	OTTHUMG00000018028.2	lincRNA	1	0.734214
chr10	48745545	48746128	583	-	ENSG00000228754.1	processed_pseudogene	RP11-534L6.3	OTTHUMG00000018177.1	pseudogene	1	1.71527
chr10	63465229	63466563	1334	+	ENSG00000272767.1	antisense	JMJD1C-AS1	OTTHUMG00000186280.1	lncRNA	1	0.749625
chr10	70198988	70199239	251	-	ENSG00000232142.1	processed_pseudogene	RP11-367H5.8	OTTHUMG00000018403.1	pseudogene	1	3.98406
chr10	71217224	71218228	1004	-	ENSG00000237512.6	antisense	UNC5B-AS1	OTTHUMG00000018423.2	lncRNA	1	0.996016
chr10	72274915	72275980	1065	-	ENSG00000269926.1	antisense	RP11-442H21.2	OTTHUMG00000018435.2	lncRNA	1	0.938967
chr10	75430571	75431588	1017	-	ENSG00000236842.1	antisense	RP11-399K21.10	OTTHUMG00000018527.1	lncRNA	1	0.983284
chr10	88727485	88728914	1429	+	ENSG00000226358.1	processed_pseudogene	KRT8P38	OTTHUMG00000018697.1	pseudogene	1	0.69979
chr10	91908131	91909348	1217	+	ENSG00000272817.1	antisense	RP11-402D21.2	OTTHUMG00000186460.1	lncRNA	1	0.821693
chr10	93059663	93060426	763	-	ENSG00000226425.1	antisense	RP11-348J12.2	OTTHUMG00000018768.1	lncRNA	1	1.31062
chr10	95183653	95184217	564	+	ENSG00000225533.1	processed_pseudogene	PAWRP1	OTTHUMG00000018807.1	pseudogene	1	1.77305
chr10	101060029	101061005	976	-	ENSG00000273162.1	lincRNA	RP11-108L7.15	OTTHUMG00000186479.1	lincRNA	1	1.02459
chr10	102449837	102451543	1706	-	ENSG00000120055.7	lincRNA	C10orf95	OTTHUMG00000018959.1	lincRNA	1	0.586166
chr10	124867510	124868326	816	+	ENSG00000214807.2	processed_pseudogene	NPM1P31	OTTHUMG00000019219.1	pseudogene	1	1.22549
chr10	125718771	125719365	594	-	ENSG00000234134.1	sense_intronic	RP11-383C5.5	OTTHUMG00000019232.1	lncRNA	1	1.6835
chr10	133246478	133247891	1413	-	ENSG00000166917.8	antisense	MIR202HG	OTTHUMG00000170605.1	lncRNA	1	0.707714
chr11	3854318	3855509	1191	-	ENSG00000228661.1	antisense	AC090587.5	OTTHUMG00000012285.1	lncRNA	1	0.839631
chr11	3854612	3855399	787	+	ENSG00000229368.1	sense_overlapping	AC090587.4	OTTHUMG00000012284.1	lncRNA	1	1.27065
chr11	4722740	4724171	1431	-	ENSG00000271602.1	processed_pseudogene	KRT8P49	OTTHUMG00000184842.1	pseudogene	1	0.698812
chr11	7568866	7572046	3180	-	ENSG00000254864.1	antisense	CTD-2516F10.4	OTTHUMG00000165664.1	lncRNA	2	0.628931
chr11	9094377	9095890	1513	+	ENSG00000213538.5	processed_pseudogene	KRT8P41	OTTHUMG00000165715.1	pseudogene	1	0.660939
chr11	9459556	9460702	1146	-	ENSG00000268403.2	antisense	CTD-2371O3.3	OTTHUMG00000187446.1	lncRNA	1	0.8726
chr11	14907518	14907986	468	+	ENSG00000253179.1	unprocessed_pseudogene	CALCP	OTTHUMG00000164573.23	pseudogene	2	4.2735
chr11	43943787	43947206	3419	-	ENSG00000244953.1	lincRNA	RP11-613D13.8	OTTHUMG00000166556.1	lincRNA	2	0.584966
chr11	44071462	44072403	941	+	ENSG00000255165.1	sense_intronic	CTD-2609K8.3	OTTHUMG00000166430.1	lncRNA	1	1.0627
chr11	45771432	45772358	926	+	ENSG00000205106.4	lincRNA	DKFZp779M0652	OTTHUMG00000166518.1	lincRNA	2	2.15983
chr11	55714996	55715632	636	+	ENSG00000254457.1	unprocessed_pseudogene	OR5D2P	OTTHUMG00000166804.1	pseudogene	1	1.57233
chr11	57476493	57477534	1041	-	ENSG00000255301.1	antisense	RP11-624G17.3	OTTHUMG00000167029.1	lncRNA	1	0.960615
chr11	59142121	59142610	489	-	ENSG00000255381.1	processed_pseudogene	AP001258.5	OTTHUMG00000167436.1	pseudogene	1	2.04499
chr11	59263389	59263802	413	-	ENSG00000254799.1	processed_pseudogene	SLC25A47P1	OTTHUMG00000167415.1	pseudogene	1	2.42131
chr11	62336911	62338090	1179	-	ENSG00000255118.1	antisense	RP11-703H8.7	OTTHUMG00000167512.1	lncRNA	1	0.848176
chr11	62786023	62786785	762	-	ENSG00000269176.2	antisense	RP11-727F15.12	OTTHUMG00000183002.2	lncRNA	1	1.31234
chr11	65110714	65111695	981	-	ENSG00000254501.1	antisense	AP003068.9	OTTHUMG00000165602.1	lncRNA	1	1.01937
chr11	65726939	65728214	1275	+	ENSG00000214659.4	processed_pseudogene	KRT8P26	OTTHUMG00000166591.1	pseudogene	1	0.784314
chr11	66067277	66069619	2342	-	ENSG00000255038.1	antisense	RP11-1167A19.2	OTTHUMG00000166666.1	lncRNA	2	0.853971
chr11	66264777	66265666	889	-	ENSG00000254855.1	antisense	RP11-867G23.1	OTTHUMG00000166905.1	lncRNA	1	1.12486
chr11	67374416	67374932	516	+	ENSG00000275484.1	lincRNA	CTC-1337H24.4	OTTHUMG00000188153.1	lincRNA	1	1.93798
chr11	67612653	67616257	3604	-	ENSG00000231793.4	unitary_pseudogene	DOC2GP	OTTHUMG00000154229.1	pseudogene	2	0.554939
chr11	69000765	69002048	1283	-	ENSG00000261625.1	sense_overlapping	RP11-554A11.4	OTTHUMG00000172938.1	lncRNA	1	0.779423
chr11	75800877	75803415	2538	-	ENSG00000254814.1	antisense	RP11-535A19.1	OTTHUMG00000165317.1	lncRNA	2	0.788022
chr11	89498748	89499198	450	-	ENSG00000255295.1	processed_pseudogene	RP11-745I13.1	OTTHUMG00000167299.1	pseudogene	1	2.22222
chr11	104873264	104873417	153	+	ENSG00000254569.1	unprocessed_pseudogene	RP11-693N9.1	OTTHUMG00000165999.1	pseudogene	1	6.53595
chr11	118688039	118690600	2561	-	ENSG00000255239.1	unprocessed_pseudogene	AP002954.6	OTTHUMG00000166410.1	pseudogene	2	0.780945
chr11	118791254	118793137	1883	+	ENSG00000278376.1	lincRNA	RP11-158I9.8	OTTHUMG00000188156.1	lincRNA	2	1.06213
chr11	119044188	119045493	1305	+	ENSG00000255114.1	antisense	RP11-110I1.6	OTTHUMG00000166353.1	lncRNA	1	0.766284
chr11	119065263	119065677	414	-	ENSG00000271751.1	lincRNA	RP11-110I1.14	OTTHUMG00000185714.1	lincRNA	1	2.41546
chr11	119602875	119604306	1431	-	ENSG00000230716.3	processed_pseudogene	KRT8P7	OTTHUMG00000166175.1	pseudogene	1	0.698812
chr11	121426645	121427416	771	-	ENSG00000271022.1	processed_pseudogene	RP11-142I2.1	OTTHUMG00000184782.1	pseudogene	1	1.29702
chr11	124744634	124746337	1703	-	ENSG00000255045.1	antisense	RP11-677M14.2	OTTHUMG00000165929.1	lncRNA	1	0.587199
chr11	124891304	124892126	822	+	ENSG00000254943.1	antisense	RP11-664I21.6	OTTHUMG00000165937.1	lncRNA	1	1.21655
chr11	127002910	127006058	3148	+	ENSG00000218109.5	antisense	KIRREL3-AS3	OTTHUMG00000165805.2	lncRNA	2	0.635324
chr12	203642	205094	1452	+	ENSG00000256577.2	antisense	RP11-283I3.2	OTTHUMG00000168005.2	lncRNA	1	0.688705
chr12	2752597	2753132	535	-	ENSG00000256902.1	processed_pseudogene	IQSEC3P1	OTTHUMG00000168141.1	pseudogene	1	1.86916
chr12	6537794	6538370	576	-	ENSG00000269968.1	antisense	RP5-940J5.9	OTTHUMG00000183895.1	lncRNA	1	1.73611
chr12	6964949	6965382	433	+	ENSG00000271969.1	antisense	U47924.29	OTTHUMG00000185704.1	lncRNA	1	2.30947
chr12	9135084	9135591	507	+	ENSG00000256720.1	processed_pseudogene	BTG1P1	OTTHUMG00000168328.1	pseudogene	1	1.97239
chr12	11512723	11514136	1413	+	ENSG00000270863.1	processed_pseudogene	DDX55P1	OTTHUMG00000184770.1	pseudogene	1	0.707714
chr12	12355406	12357067	1661	-	ENSG00000205791.3	lincRNA	LOH12CR2	OTTHUMG00000187482.1	lincRNA	1	0.602047
chr12	31324316	31325829	1513	+	ENSG00000177340.5	antisense	FLJ13224	OTTHUMG00000187470.1	lncRNA	1	0.660939
chr12	47905122	47906865	1743	+	ENSG00000278385.1	lincRNA	RP11-89H19.2	OTTHUMG00000187441.1	lincRNA	1	0.573723
chr12	48442030	48442947	917	-	ENSG00000226413.2	unprocessed_pseudogene	OR8T1P	OTTHUMG00000154311.2	pseudogene	1	1.09051
chr12	48995150	48996334	1184	+	ENSG00000258283.1	antisense	RP11-386G11.3	OTTHUMG00000170404.1	lncRNA	1	0.844595
chr12	51820459	51822415	1956	-	ENSG00000261308.1	processed_pseudogene	FIGNL2	OTTHUMG00000175693.1	pseudogene	3	1.53374
chr12	55646195	55646663	468	-	ENSG00000272837.1	unprocessed_pseudogene	OR10AE3P	OTTHUMG00000185941.1	pseudogene	1	2.13675
chr12	55729104	55730852	1748	+	ENSG00000258056.2	antisense	RP11-644F5.11	OTTHUMG00000170187.2	lncRNA	1	0.572082
chr12	56118968	56119939	971	-	ENSG00000258345.1	antisense	RP11-603J24.6	OTTHUMG00000170141.1	lncRNA	1	1.02987
chr12	56376818	56377331	513	-	ENSG00000274823.1	processed_pseudogene	RP11-348M3.6	OTTHUMG00000188037.1	pseudogene	1	1.94932
chr12	62021570	62022174	604	-	ENSG00000213363.4	processed_pseudogene	RPS3P6	OTTHUMG00000157595.1	pseudogene	1	1.65563
chr12	67440998	67442559	1561	-	ENSG00000256172.1	lincRNA	RP11-473M14.3	OTTHUMG00000169068.1	lincRNA	1	0.640615
chr12	69284397	69285485	1088	+	ENSG00000257818.1	processed_pseudogene	C1GALT1P1	OTTHUMG00000169341.1	pseudogene	1	0.919118
chr12	94140077	94141337	1260	+	ENSG00000257360.1	processed_pseudogene	RP11-74K11.1	OTTHUMG00000170234.1	pseudogene	1	0.793651
chr12	101773114	101773755	641	-	ENSG00000258230.2	transcribed_processed_pseudogene	RP11-511H9.3	OTTHUMG00000170445.2	pseudogene	1	1.56006
chr12	103503381	103504936	1555	+	ENSG00000257415.1	processed_pseudogene	RP11-626I20.1	OTTHUMG00000170053.1	pseudogene	1	0.643087
chr12	109052350	109053952	1602	-	ENSG00000256262.1	antisense	USP30-AS1	OTTHUMG00000169245.1	lncRNA	1	0.62422
chr12	117889454	117891008	1554	+	ENSG00000256071.1	antisense	RP11-465L8.1	OTTHUMG00000169021.1	lncRNA	1	0.643501
chr12	118375350	118376275	925	-	ENSG00000270482.1	lincRNA	RP11-131L12.2	OTTHUMG00000185168.1	lincRNA	1	1.08108
chr12	122501187	122501641	454	+	ENSG00000275265.1	lincRNA	RP11-15J22.8	OTTHUMG00000187270.1	lincRNA	1	2.20264
chr12	122865335	122867021	1686	+	ENSG00000256152.2	lincRNA	RP11-463O12.3	OTTHUMG00000168766.2	lincRNA	1	0.59312
chr12	130047132	130048376	1244	+	ENSG00000256298.1	lincRNA	RP11-474D1.1	OTTHUMG00000168374.1	lincRNA	1	0.803859
chr12	132282814	132284606	1792	+	ENSG00000277011.1	lincRNA	RP13-895J2.6	OTTHUMG00000167983.1	lincRNA	1	0.558036
chr13	19587118	19588350	1232	+	ENSG00000225316.1	lincRNA	LINC00350	OTTHUMG00000016497.1	lincRNA	1	0.811688
chr13	19818121	19818619	498	-	ENSG00000233469.1	processed_pseudogene	ST6GALNAC4P1	OTTHUMG00000016501.1	pseudogene	1	2.00803
chr13	22915651	22916523	872	+	ENSG00000234685.1	processed_pseudogene	NUS1P2	OTTHUMG00000016556.3	pseudogene	1	1.14679
chr13	27953526	27955370	1844	+	ENSG00000260704.1	lincRNA	LINC00543	OTTHUMG00000170880.1	lincRNA	2	1.0846
chr13	45340039	45341183	1144	+	ENSG00000273149.1	antisense	RP11-290D2.6	OTTHUMG00000186000.1	lncRNA	1	0.874126
chr13	53199981	53202753	2772	+	ENSG00000225510.2	transcribed_processed_pseudogene	PCDH8P1	OTTHUMG00000016982.2	pseudogene	2	0.721501
chr13	55999200	56000448	1248	-	ENSG00000228611.2	processed_pseudogene	HNF4GP1	OTTHUMG00000016986.2	pseudogene	1	0.801282
chr13	57632759	57633575	816	-	ENSG00000278722.1	antisense	RP11-95F22.1	OTTHUMG00000188188.1	lncRNA	1	1.22549
chr13	62327988	62328384	396	+	ENSG00000232105.1	processed_pseudogene	RPL32P28	OTTHUMG00000017018.1	pseudogene	1	2.52525
chr13	93226612	93227317	705	-	ENSG00000278177.1	antisense	RP11-632L2.2	OTTHUMG00000187253.1	lncRNA	1	1.41844
chr13	102903339	102904000	661	+	ENSG00000278445.1	lincRNA	RP11-255P5.3	OTTHUMG00000187302.1	lincRNA	1	1.51286
chr13	103444620	103444968	348	-	ENSG00000230474.1	processed_pseudogene	ATP6V1G1P7	OTTHUMG00000017315.1	pseudogene	1	2.87356
chr14	20305730	20306811	1081	+	ENSG00000258459.1	antisense	CTD-2292M16.7	OTTHUMG00000170853.1	lncRNA	1	0.925069
chr14	22556640	22559037	2397	+	ENSG00000259003.1	lincRNA	AE000662.92	OTTHUMG00000170968.2	lincRNA	2	0.834376
chr14	25431193	25432234	1041	-	ENSG00000257976.1	processed_pseudogene	RP11-388G3.1	OTTHUMG00000170317.1	pseudogene	1	0.960615
chr14	38605255	38606098	843	+	ENSG00000271468.1	processed_pseudogene	RP11-14N4.1	OTTHUMG00000184397.1	pseudogene	1	1.18624
chr14	39174885	39175880	995	-	ENSG00000259083.1	antisense	RP11-407N17.4	OTTHUMG00000170768.1	lncRNA	1	1.00503
chr14	43540883	43541826	943	-	ENSG00000258828.2	processed_pseudogene	KRT8P2	OTTHUMG00000170707.2	pseudogene	1	1.06045
chr14	48398310	48399375	1065	+	ENSG00000258750.2	processed_pseudogene	RP11-2G1.2	OTTHUMG00000170799.2	pseudogene	1	0.938967
chr14	50397013	50398345	1332	+	ENSG00000258857.1	lincRNA	RP11-247L20.3	OTTHUMG00000170887.1	lincRNA	1	0.750751
chr14	65411170	65412690	1520	-	ENSG00000276116.2	antisense	FUT8-AS1	OTTHUMG00000186893.2	lncRNA	1	0.657895
chr14	70858844	70859429	585	-	ENSG00000258431.1	processed_pseudogene	RP1-292L20.2	OTTHUMG00000171284.3	pseudogene	1	1.7094
chr14	73539221	73539781	560	-	ENSG00000258408.1	processed_pseudogene	NT5CP2	OTTHUMG00000171604.1	pseudogene	1	1.78571
chr14	73571159	73571667	508	-	ENSG00000258524.1	processed_pseudogene	NT5CP1	OTTHUMG00000171605.1	pseudogene	1	1.9685
chr14	73631475	73632019	544	+	ENSG00000258972.1	processed_pseudogene	NDUFB8P1	OTTHUMG00000171641.1	pseudogene	1	1.83824
chr14	75970924	75971587	663	+	ENSG00000258876.1	lincRNA	RP11-270M14.5	OTTHUMG00000171614.1	lincRNA	1	1.5083
chr14	85528599	85529386	787	+	ENSG00000258945.1	lincRNA	RP11-497E19.2	OTTHUMG00000171371.1	lincRNA	1	1.27065
chr14	93138066	93138465	399	+	ENSG00000258595.2	processed_pseudogene	RP11-371E8.2	OTTHUMG00000171264.2	pseudogene	1	2.50627
chr14	95516136	95517911	1775	+	ENSG00000258572.1	lincRNA	RP11-1070N10.3	OTTHUMG00000171637.1	lincRNA	1	0.56338
chr14	96275046	96276723	1677	-	ENSG00000258729.2	lincRNA	RP11-404P21.6	OTTHUMG00000171413.1	lincRNA	1	0.596303
chr14	101843394	101844122	728	-	ENSG00000259161.2	processed_pseudogene	CTD-2017C7.3	OTTHUMG00000171643.2	pseudogene	1	1.37363
chr14	103187221	103189028	1807	-	ENSG00000251533.2	lincRNA	LINC00605	OTTHUMG00000171894.1	lincRNA	1	0.553403
chr14	103279223	103279955	732	+	ENSG00000270938.1	transcribed_processed_pseudogene	RAP2CP1	OTTHUMG00000184396.1	pseudogene	1	1.36612
chr14	103694516	103695050	534	-	ENSG00000269910.1	antisense	RP11-73M18.10	OTTHUMG00000183944.1	lncRNA	1	1.87266
chr14	103694560	103695170	610	+	ENSG00000269940.1	sense_intronic	RP11-73M18.7	OTTHUMG00000183945.1	lncRNA	1	1.63934
chr14	104137150	104137898	748	-	ENSG00000258748.1	antisense	CTD-2223O18.1	OTTHUMG00000171595.1	lncRNA	1	1.3369
chr14	106436415	106436555	140	-	ENSG00000228757.1	unprocessed_pseudogene	AB019438.66	OTTHUMG00000152076.2	pseudogene	1	7.14286
chr15	25345633	25347235	1602	-	ENSG00000261529.1	sense_intronic	RP13-487P22.1	OTTHUMG00000176881.1	lncRNA	1	0.62422
chr15	29612570	29614274	1704	+	ENSG00000259300.2	processed_pseudogene	TUBBP8	OTTHUMG00000172188.3	pseudogene	1	0.586854
chr15	42313687	42314386	699	+	ENSG00000260571.1	processed_pseudogene	BNIP3P5	OTTHUMG00000172874.1	pseudogene	1	1.43062
chr15	42800968	42802405	1437	-	ENSG00000260799.1	processed_pseudogene	KRT8P50	OTTHUMG00000176056.1	pseudogene	1	0.695894
chr15	45198517	45199139	622	-	ENSG00000259932.1	sense_intronic	CTD-2651B20.7	OTTHUMG00000172833.1	lncRNA	2	3.21543
chr15	45215547	45215943	396	+	ENSG00000259338.1	processed_pseudogene	CTD-2651B20.2	OTTHUMG00000172001.1	pseudogene	1	2.52525
chr15	48971803	48973361	1558	+	ENSG00000259500.1	processed_pseudogene	KRT8P24	OTTHUMG00000172162.1	pseudogene	1	0.641849
chr15	49177610	49178741	1131	-	ENSG00000259545.2	processed_pseudogene	RP11-325E5.4	OTTHUMG00000172327.2	pseudogene	1	0.884173
chr15	60593027	60593460	433	+	ENSG00000273958.1	lincRNA	RP11-219B17.3	OTTHUMG00000186916.1	lincRNA	1	2.30947
chr15	63046034	63049387	3353	-	ENSG00000259498.1	antisense	RP11-244F12.3	OTTHUMG00000172299.1	lncRNA	2	0.596481
chr15	65083042	65083663	621	-	ENSG00000278737.1	lincRNA	RP11-325L12.7	OTTHUMG00000186925.1	lincRNA	1	1.61031
chr15	74125915	74129278	3363	-	ENSG00000248540.2	lincRNA	RP11-247C2.2	OTTHUMG00000173053.1	lincRNA	2	0.594707
chr15	74303005	74304343	1338	+	ENSG00000261384.1	sense_intronic	RP11-60L3.2	OTTHUMG00000172634.1	lncRNA	1	0.747384
chr15	74374678	74375511	833	+	ENSG00000274937.1	lincRNA	CTD-2311M21.4	OTTHUMG00000186953.1	lincRNA	2	2.40096
chr15	75251743	75252934	1191	-	ENSG00000261205.2	processed_pseudogene	NIFKP4	OTTHUMG00000172670.2	pseudogene	1	0.839631
chr15	75368155	75369584	1429	+	ENSG00000260274.1	lincRNA	RP11-817O13.8	OTTHUMG00000173067.1	lincRNA	1	0.69979
chr15	75452964	75453947	983	-	ENSG00000276744.1	sense_intronic	CTD-2562G15.3	OTTHUMG00000186962.1	lncRNA	1	1.01729
chr15	75639760	75640976	1216	+	ENSG00000275454.1	antisense	CTD-2026K11.4	OTTHUMG00000186970.1	lncRNA	1	0.822368
chr15	86139838	86140240	402	-	ENSG00000261077.1	processed_pseudogene	RP11-553E24.1	OTTHUMG00000172871.1	pseudogene	1	2.48756
chr15	86914443	86916155	1712	+	ENSG00000273540.1	sense_intronic	RP11-133L19.3	OTTHUMG00000172873.1	lncRNA	1	0.584112
chr15	90932586	90935130	2544	-	ENSG00000224441.1	antisense	AC068831.3	OTTHUMG00000141259.1	lncRNA	2	0.786164
chr15	94168349	94168751	402	+	ENSG00000258570.1	processed_pseudogene	RP11-452K20.1	OTTHUMG00000171812.1	pseudogene	1	2.48756
chr15	99791127	99792847	1720	+	ENSG00000259655.1	unprocessed_pseudogene	CTD-2054N24.1	OTTHUMG00000172117.1	pseudogene	1	0.581395
chr16	2922662	2923202	540	-	ENSG00000262959.2	processed_pseudogene	RPL23AP86	OTTHUMG00000177365.2	pseudogene	1	1.85185
chr16	3003431	3005101	1670	-	ENSG00000262362.1	sense_overlapping	LA16c-380H5.2	OTTHUMG00000177449.1	lncRNA	1	0.598802
chr16	8869251	8870032	781	+	ENSG00000261481.1	antisense	RP11-77H9.6	OTTHUMG00000176902.1	lncRNA	1	1.28041
chr16	11380859	11381118	259	-	ENSG00000262636.1	processed_pseudogene	CTD-3088G3.4	OTTHUMG00000177412.1	pseudogene	1	3.861
chr16	11741910	11744506	2596	+	ENSG00000262420.3	antisense	RP11-490O6.2	OTTHUMG00000177468.1	lncRNA	2	0.770416
chr16	12093627	12095307	1680	-	ENSG00000261293.1	antisense	RP11-276H1.2	OTTHUMG00000172961.2	lncRNA	1	0.595238
chr16	13331368	13332583	1215	-	ENSG00000262011.1	antisense	AC003009.1	OTTHUMG00000177335.1	lncRNA	1	0.823045
chr16	19410729	19411662	933	-	ENSG00000260681.1	antisense	CTA-363E6.5	OTTHUMG00000177223.1	lncRNA	1	1.07181
chr16	21950218	21951708	1490	-	ENSG00000274460.1	processed_transcript	CTD-2649C14.2	OTTHUMG00000186800.1	processed_transcript	1	0.671141
chr16	25106569	25107102	533	-	ENSG00000275494.1	sense_intronic	RP11-266L9.8	OTTHUMG00000186826.1	lncRNA	1	1.87617
chr16	28553709	28554140	431	-	ENSG00000275441.1	antisense	RP11-666O2.2	OTTHUMG00000186839.1	lncRNA	1	2.32019
chr16	28862166	28863340	1174	-	ENSG00000261766.1	antisense	RP11-22P6.2	OTTHUMG00000176591.1	lncRNA	1	0.851789
chr16	29806496	29807732	1236	-	ENSG00000259952.1	antisense	AC009133.15	OTTHUMG00000177140.1	lncRNA	1	0.809061
chr16	30355441	30357104	1663	+	ENSG00000260219.2	lincRNA	RP11-347C12.10	OTTHUMG00000176862.2	lincRNA	1	0.601323
chr16	30359825	30360336	511	+	ENSG00000274653.1	antisense	RP11-347C12.11	OTTHUMG00000186866.2	lncRNA	1	1.95695
chr16	30615256	30615679	423	-	ENSG00000260678.1	transcribed_processed_pseudogene	RP11-146F11.4	OTTHUMG00000176952.1	pseudogene	1	2.36407
chr16	31118078	31118747	669	+	ENSG00000262766.1	sense_intronic	RP11-196G11.4	OTTHUMG00000177740.1	lncRNA	1	1.49477
chr16	31456711	31459736	3025	-	ENSG00000260267.1	antisense	RP11-452L6.5	OTTHUMG00000176617.1	lncRNA	2	0.661157
chr16	48334471	48334854	383	-	ENSG00000240793.1	processed_pseudogene	UBA52P8	OTTHUMG00000158140.1	pseudogene	1	2.61097
chr16	49920730	49924154	3424	-	ENSG00000261751.1	lincRNA	RP11-305A4.3	OTTHUMG00000173446.1	lincRNA	2	0.584112
chr16	50666211	50671639	5428	+	ENSG00000260249.2	antisense	RP11-401P9.5	OTTHUMG00000173401.2	lncRNA	3	0.55269
chr16	50806668	50807629	961	+	ENSG00000261703.1	lincRNA	RP11-327F22.5	OTTHUMG00000173406.1	lincRNA	1	1.04058
chr16	56643705	56644786	1081	+	ENSG00000205361.8	transcribed_unprocessed_pseudogene	MT1DP	OTTHUMG00000158354.2	pseudogene	1	0.925069
chr16	57461055	57462737	1682	+	ENSG00000260345.1	processed_transcript	AC009052.12	OTTHUMG00000176595.1	processed_transcript	1	0.59453
chr16	68236845	68237667	822	-	ENSG00000261469.1	sense_intronic	RP11-96D1.6	OTTHUMG00000176679.1	lncRNA	1	1.21655
chr16	75694434	75696107	1673	-	ENSG00000282757.1	unprocessed_pseudogene	RP11-490B18.8	OTTHUMG00000191434.1	pseudogene	1	0.597729
chr17	4731756	4732371	615	-	ENSG00000261898.2	antisense	RP11-314A20.5	OTTHUMG00000177897.2	lncRNA	1	1.62602
chr17	5019214	5020093	879	-	ENSG00000227495.1	antisense	AC109333.10	OTTHUMG00000132924.2	lncRNA	1	1.13766
chr17	6653464	6655009	1545	-	ENSG00000261996.1	lincRNA	CTC-281F24.1	OTTHUMG00000177865.1	lincRNA	1	0.647249
chr17	6749685	6749978	293	-	ENSG00000262990.1	processed_pseudogene	CTC-281F24.2	OTTHUMG00000177868.1	pseudogene	1	3.41297
chr17	6749718	6750188	470	+	ENSG00000244283.1	processed_pseudogene	RPL23AP73	OTTHUMG00000157675.1	pseudogene	1	2.12766
chr17	7436557	7437523	966	-	ENSG00000262624.1	antisense	RP11-104H15.9	OTTHUMG00000178213.1	lncRNA	1	1.0352
chr17	8079482	8081565	2083	+	ENSG00000214999.3	antisense	AC129492.6	OTTHUMG00000132872.1	lncRNA	2	0.960154
chr17	8965896	8967070	1174	+	ENSG00000266389.1	lincRNA	CTB-41I6.1	OTTHUMG00000178278.1	lincRNA	1	0.851789
chr17	16427474	16428719	1245	+	ENSG00000239203.1	processed_transcript	AC093484.4	OTTHUMG00000058991.1	processed_transcript	1	0.803213
chr17	20008051	20009234	1183	-	ENSG00000261033.1	antisense	RP11-209D14.2	OTTHUMG00000175977.2	lncRNA	1	0.845309
chr17	22693325	22694831	1506	-	ENSG00000264431.1	processed_pseudogene	RP11-285M22.2	OTTHUMG00000179097.2	pseudogene	1	0.664011
chr17	28226563	28228065	1502	+	ENSG00000237575.4	transcribed_unprocessed_pseudogene	PYY2	OTTHUMG00000132450.2	pseudogene	2	1.33156
chr17	28247444	28248289	845	+	ENSG00000265060.1	transcribed_unprocessed_pseudogene	PPY2P	OTTHUMG00000179302.1	pseudogene	1	1.18343
chr17	28416922	28417492	570	+	ENSG00000265541.1	unprocessed_pseudogene	H3F3BP2	OTTHUMG00000179306.1	pseudogene	1	1.75439
chr17	28848860	28849592	732	+	ENSG00000264138.1	unprocessed_pseudogene	RP11-20B24.3	OTTHUMG00000179496.1	pseudogene	2	2.73224
chr17	28897738	28899402	1664	+	ENSG00000266642.2	antisense	RP11-20B24.4	OTTHUMG00000179498.3	lncRNA	1	0.600962
chr17	29591703	29592241	538	-	ENSG00000264647.1	antisense	RP11-68I3.7	OTTHUMG00000179725.1	lncRNA	1	1.85874
chr17	29639627	29640825	1198	+	ENSG00000263370.1	antisense	RP11-68I3.5	OTTHUMG00000179727.1	lncRNA	1	0.834725
chr17	32111562	32112590	1028	-	ENSG00000265574.1	processed_pseudogene	WDR45BP1	OTTHUMG00000179563.1	pseudogene	2	1.94553
chr17	32876759	32878637	1878	+	ENSG00000226377.1	antisense	AC084809.2	OTTHUMG00000132777.1	lncRNA	2	1.06496
chr17	34080882	34082224	1342	-	ENSG00000263485.1	sense_intronic	CTC-304I17.4	OTTHUMG00000179673.1	lncRNA	1	0.745156
chr17	34176538	34178166	1628	+	ENSG00000264990.1	lincRNA	RP11-215E13.2	OTTHUMG00000179677.1	lincRNA	1	0.614251
chr17	35406948	35407818	870	-	ENSG00000267648.1	transcribed_processed_pseudogene	RP11-686D22.3	OTTHUMG00000179880.2	pseudogene	1	1.14943
chr17	37649133	37650894	1761	+	ENSG00000274244.1	lincRNA	RP11-697E22.3	OTTHUMG00000188477.1	lincRNA	1	0.567859
chr17	39835037	39836080	1043	-	ENSG00000264663.1	processed_pseudogene	KRT8P34	OTTHUMG00000179518.1	pseudogene	1	0.958773
chr17	42552436	42554748	2312	-	ENSG00000266962.2	antisense	RP11-400F19.6	OTTHUMG00000180244.2	lncRNA	2	0.865052
chr17	42679963	42682020	2057	+	ENSG00000267042.1	antisense	CTD-3193K9.4	OTTHUMG00000180642.1	lncRNA	2	0.97229
chr17	43917194	43917985	791	+	ENSG00000267496.4	lincRNA	FAM215A	OTTHUMG00000181798.1	lincRNA	1	1.26422
chr17	43938363	43938959	596	+	ENSG00000261514.1	lincRNA	RP11-527L4.2	OTTHUMG00000176999.1	lincRNA	1	1.67785
chr17	44328613	44331462	2849	+	ENSG00000267211.1	lincRNA	RP5-1067M6.3	OTTHUMG00000181815.1	lincRNA	2	0.702001
chr17	46193576	46196723	3147	+	ENSG00000214401.4	antisense	KANSL1-AS1	OTTHUMG00000178028.2	lncRNA	3	0.953289
chr17	47946802	47948275	1473	-	ENSG00000264019.1	antisense	RP11-6N17.6	OTTHUMG00000178296.1	lncRNA	1	0.678887
chr17	50094065	50094647	582	+	ENSG00000276851.1	lincRNA	RP5-875H18.9	OTTHUMG00000186661.1	lincRNA	1	1.71821
chr17	50396438	50397888	1450	+	ENSG00000253102.1	antisense	RP1-117B12.4	OTTHUMG00000162080.3	lncRNA	1	0.689655
chr17	54754165	54754649	484	-	ENSG00000263125.1	processed_pseudogene	ARL2BPP8	OTTHUMG00000177815.2	pseudogene	1	2.06612
chr17	56939932	56941275	1343	+	ENSG00000262298.1	antisense	RP5-1107A17.3	OTTHUMG00000178127.1	lncRNA	1	0.744602
chr17	58157028	58157800	772	+	ENSG00000229590.3	processed_pseudogene	MSX2P1	OTTHUMG00000178800.1	pseudogene	1	1.29534
chr17	60315834	60316215	381	+	ENSG00000271626.1	processed_pseudogene	RP11-3K24.2	OTTHUMG00000184886.1	pseudogene	1	2.62467
chr17	61354763	61355155	392	-	ENSG00000273982.1	antisense	RP11-332H18.7	OTTHUMG00000186680.1	lncRNA	1	2.55102
chr17	61411751	61413280	1529	+	ENSG00000187013.4	lincRNA	C17orf82	OTTHUMG00000180077.1	lincRNA	2	1.30804
chr17	64491523	64491789	266	+	ENSG00000256826.1	processed_pseudogene	AC138744.2	OTTHUMG00000132312.1	pseudogene	1	3.7594
chr17	67276118	67276351	233	-	ENSG00000264093.1	processed_pseudogene	RP11-401F2.2	OTTHUMG00000179557.1	pseudogene	1	4.29185
chr17	74209980	74213342	3362	-	ENSG00000246731.2	antisense	MGC16275	OTTHUMG00000166017.1	lncRNA	2	0.594884
chr17	75271369	75273895	2526	+	ENSG00000263843.1	antisense	RP11-649A18.12	OTTHUMG00000179606.1	lncRNA	2	0.791766
chr17	75876372	75879546	3174	+	ENSG00000267801.1	antisense	RP11-552F3.9	OTTHUMG00000179917.1	lncRNA	2	0.63012
chr17	77373818	77377236	3418	-	ENSG00000266998.1	antisense	RP11-936I5.1	OTTHUMG00000177710.1	lncRNA	2	0.585138
chr17	81345476	81345966	490	-	ENSG00000275966.1	lincRNA	RP11-1055B8.9	OTTHUMG00000186721.1	lincRNA	1	2.04082
chr17	82153430	82154815	1385	+	ENSG00000265678.1	antisense	RP11-1376P16.2	OTTHUMG00000178560.1	lncRNA	1	0.722022
chr18	832238	832469	231	+	ENSG00000266575.1	processed_pseudogene	BOLA2P1	OTTHUMG00000178360.1	pseudogene	1	4.329
chr18	6728821	6729862	1041	-	ENSG00000266441.1	antisense	RP11-91I8.3	OTTHUMG00000178470.1	lncRNA	1	0.960615
chr18	12056676	12057822	1146	-	ENSG00000212712.2	processed_pseudogene	AP002414.1	OTTHUMG00000073721.2	pseudogene	1	0.8726
chr18	12091674	12093141	1467	-	ENSG00000267478.1	processed_pseudogene	RP11-815J4.5	OTTHUMG00000180684.1	pseudogene	1	0.681663
chr18	12246589	12247055	466	+	ENSG00000267663.1	processed_pseudogene	RP11-64C12.9	OTTHUMG00000180721.1	pseudogene	1	2.14592
chr18	14074912	14075741	829	-	ENSG00000267756.1	unprocessed_pseudogene	RP11-411B10.4	OTTHUMG00000182056.1	pseudogene	1	1.20627
chr18	24402153	24402714	561	+	ENSG00000273321.1	lincRNA	RP11-621L6.3	OTTHUMG00000186241.1	lincRNA	1	1.78253
chr18	58398663	58400082	1419	-	ENSG00000267396.1	antisense	RP11-845C23.3	OTTHUMG00000179965.1	lncRNA	1	0.704722
chr18	59696459	59698111	1652	+	ENSG00000267774.2	antisense	RP11-2N1.2	OTTHUMG00000180091.2	lncRNA	1	0.605327
chr18	61957273	61958014	741	-	ENSG00000267597.1	processed_pseudogene	RPIAP1	OTTHUMG00000180097.1	pseudogene	1	1.34953
chr18	76256891	76258337	1446	+	ENSG00000264212.1	lincRNA	RP11-94B19.3	OTTHUMG00000179136.1	lincRNA	1	0.691563
chr18	76259166	76260114	948	+	ENSG00000266614.1	lincRNA	RP11-94B19.4	OTTHUMG00000179137.1	lincRNA	1	1.05485
chr18	76805151	76805736	585	-	ENSG00000278107.1	lincRNA	RP11-162A12.4	OTTHUMG00000186681.1	lincRNA	1	1.7094
chr18	78505165	78506410	1245	+	ENSG00000265378.1	lincRNA	RP11-123I22.1	OTTHUMG00000179397.1	lincRNA	1	0.803213
chr19	999796	1002757	2961	-	ENSG00000266990.1	antisense	LLNLR-284B4.2	OTTHUMG00000189099.1	lncRNA	2	0.675447
chr19	1852382	1853622	1240	+	ENSG00000267125.2	antisense	CTB-31O20.6	OTTHUMG00000179993.2	lncRNA	1	0.806452
chr19	2610155	2611862	1707	-	ENSG00000267412.1	sense_intronic	CTC-265F19.2	OTTHUMG00000180437.1	lncRNA	1	0.585823
chr19	3672582	3674295	1713	+	ENSG00000267304.1	antisense	AC004637.1	OTTHUMG00000180871.1	lncRNA	1	0.583771
chr19	6716386	6717742	1356	-	ENSG00000276980.1	sense_intronic	CTD-3128G10.7	OTTHUMG00000186561.1	lncRNA	1	0.737463
chr19	9834079	9835013	934	-	ENSG00000267289.1	lincRNA	CTD-2623N2.11	OTTHUMG00000180387.1	lincRNA	1	1.07066
chr19	10259109	10260045	936	-	ENSG00000267105.1	antisense	CTD-2369P2.4	OTTHUMG00000180402.1	lncRNA	1	1.06838
chr19	10333436	10336248	2812	+	ENSG00000274425.1	antisense	AC114271.2	OTTHUMG00000186597.1	lncRNA	3	1.06686
chr19	17296196	17296695	499	-	ENSG00000269815.1	sense_intronic	CTD-2278I10.4	OTTHUMG00000182664.1	lncRNA	1	2.00401
chr19	34904392	34905057	665	-	ENSG00000271171.1	lincRNA	CTC-523E23.15	OTTHUMG00000185150.1	lincRNA	1	1.50376
chr19	36378028	36378832	804	+	ENSG00000266973.1	antisense	CTD-3162L10.3	OTTHUMG00000180676.1	lncRNA	1	1.24378
chr19	36489649	36491040	1391	+	ENSG00000267309.1	antisense	CTD-2630F21.1	OTTHUMG00000180679.1	lncRNA	1	0.718907
chr19	39264382	39265817	1435	+	ENSG00000272311.1	unprocessed_pseudogene	IFNL4P1	OTTHUMG00000185300.2	pseudogene	1	0.696864
chr19	39341773	39341945	172	-	ENSG00000269246.1	lincRNA	CTC-246B18.10	OTTHUMG00000183224.1	lincRNA	1	5.81395
chr19	42424384	42425071	687	-	ENSG00000268605.1	sense_intronic	CTB-50E14.4	OTTHUMG00000182816.1	lncRNA	1	1.4556
chr19	42560433	42561750	1317	-	ENSG00000230558.2	unprocessed_pseudogene	CEACAMP2	OTTHUMG00000151119.2	pseudogene	1	0.759301
chr19	45641494	45642840	1346	+	ENSG00000267757.4	processed_transcript	EML2-AS1	OTTHUMG00000182128.1	processed_transcript	1	0.742942
chr19	47607873	47608454	581	-	ENSG00000277383.1	antisense	CTD-3001H11.2	OTTHUMG00000186770.1	lncRNA	1	1.72117
chr19	47794467	47794890	423	-	ENSG00000213035.4	processed_pseudogene	RPL23AP80	OTTHUMG00000158216.2	pseudogene	1	2.36407
chr19	47794650	47794920	270	+	ENSG00000271150.1	processed_pseudogene	CTD-2571L23.9	OTTHUMG00000185249.1	pseudogene	1	3.7037
chr19	49688853	49690573	1720	-	ENSG00000268677.1	antisense	CTB-33G10.6	OTTHUMG00000183248.1	lncRNA	1	0.581395
chr19	50486810	50487638	828	-	ENSG00000268518.1	lincRNA	CTD-2545M3.8	OTTHUMG00000183047.1	lincRNA	1	1.20773
chr19	50555370	50557969	2599	-	ENSG00000268231.1	sense_intronic	CTD-2560K21.6	OTTHUMG00000183148.1	lncRNA	2	0.769527
chr19	51563797	51564910	1113	-	ENSG00000268267.1	unprocessed_pseudogene	SIGLEC29P	OTTHUMG00000183514.1	pseudogene	1	0.898473
chr19	52049007	52049754	747	+	ENSG00000275055.1	antisense	CTC-471J1.11	OTTHUMG00000186778.1	lncRNA	1	1.33869
chr19	53512092	53512616	524	-	ENSG00000274892.1	unprocessed_pseudogene	CTB-167G5.7	OTTHUMG00000188032.1	pseudogene	1	1.9084
chr19	53772506	53773280	774	-	ENSG00000229000.1	processed_pseudogene	SEPT7P8	OTTHUMG00000060777.1	pseudogene	1	1.29199
chr19	54031412	54031504	92	+	ENSG00000276206.1	unprocessed_pseudogene	CTD-3093M3.1	OTTHUMG00000188518.1	pseudogene	1	10.8696
chr19	55670632	55672069	1437	+	ENSG00000267096.1	sense_intronic	CTD-2537I9.13	OTTHUMG00000180910.1	lncRNA	1	0.695894
chr19	55777553	55778900	1347	+	ENSG00000255238.1	processed_pseudogene	RFPL4AP1	OTTHUMG00000165451.1	pseudogene	1	0.74239
chr20	267186	268857	1671	+	ENSG00000272874.1	lincRNA	RP5-1103G7.10	OTTHUMG00000186509.1	lincRNA	1	0.598444
chr20	14757563	14758056	493	+	ENSG00000213950.2	processed_pseudogene	RPS10P2	OTTHUMG00000031918.1	pseudogene	1	2.0284
chr20	18090116	18090715	599	-	ENSG00000227343.1	processed_pseudogene	RPL15P1	OTTHUMG00000031959.1	pseudogene	1	1.66945
chr20	19212852	19213477	625	-	ENSG00000235996.1	antisense	RP11-97N19.2	OTTHUMG00000031988.1	lncRNA	1	1.6
chr20	25284915	25285588	673	-	ENSG00000276952.1	antisense	RP5-965G21.6	OTTHUMG00000186746.1	lncRNA	1	1.48588
chr20	25669857	25670386	529	-	ENSG00000236542.1	processed_pseudogene	MED28P7	OTTHUMG00000032128.1	pseudogene	1	1.89036
chr20	31721507	31723409	1902	+	ENSG00000281376.1	antisense	ABALON	OTTHUMG00000189574.1	lncRNA	2	1.05152
chr20	34475924	34476474	550	-	ENSG00000181741.7	processed_pseudogene	FDX1P1	OTTHUMG00000032297.1	pseudogene	1	1.81818
chr20	34476205	34476787	582	+	ENSG00000277558.1	sense_intronic	RP3-468O1.6	OTTHUMG00000186779.1	lncRNA	1	1.71821
chr20	44448777	44450092	1315	-	ENSG00000237907.1	antisense	LINC01430	OTTHUMG00000032534.2	lncRNA	1	0.760456
chr20	46099518	46100176	658	+	ENSG00000213820.3	processed_pseudogene	RPL13P2	OTTHUMG00000032642.1	pseudogene	1	1.51976
chr20	59515191	59516039	848	+	ENSG00000227282.1	lincRNA	RP11-164D18.2	OTTHUMG00000137386.1	lincRNA	1	1.17925
chr20	61369879	61370855	976	+	ENSG00000276786.1	lincRNA	WI2-8325B5.1	OTTHUMG00000186968.1	lincRNA	1	1.02459
chr20	62477870	62478594	724	+	ENSG00000272050.1	lincRNA	RP13-379O24.3	OTTHUMG00000185378.1	lincRNA	1	1.38122
chr21	20424949	20426206	1257	-	ENSG00000234439.1	processed_pseudogene	KRT18P2	OTTHUMG00000078062.1	pseudogene	1	0.795545
chr21	36168970	36170180	1210	-	ENSG00000228149.1	processed_pseudogene	RPL3P1	OTTHUMG00000086610.1	pseudogene	1	0.826446
chr21	36388878	36389112	234	-	ENSG00000224421.1	processed_pseudogene	ATP5J2LP	OTTHUMG00000086613.1	pseudogene	1	4.2735
chr21	36994643	36995075	432	+	ENSG00000215734.3	processed_pseudogene	MRPL20P1	OTTHUMG00000086645.1	pseudogene	1	2.31481
chr21	39313935	39314962	1027	+	ENSG00000255568.3	antisense	BRWD1-AS2	OTTHUMG00000066154.5	lncRNA	1	0.97371
chr21	44339376	44340470	1094	+	ENSG00000232969.1	antisense	AP001062.9	OTTHUMG00000086923.1	lncRNA	1	0.914077
chr21	44686358	44686629	271	+	ENSG00000276647.1	processed_pseudogene	RP1-225L15.1	OTTHUMG00000187956.1	pseudogene	1	3.69004
chr21	45288052	45291738	3686	+	ENSG00000215447.7	processed_transcript	BX322557.10	OTTHUMG00000090398.1	processed_transcript	3	0.81389
chr22	17213516	17214155	639	+	ENSG00000203416.3	processed_pseudogene	FAM32B	OTTHUMG00000150068.2	pseudogene	1	1.56495
chr22	17418697	17419828	1131	+	ENSG00000229492.1	processed_pseudogene	AC004019.10	OTTHUMG00000150062.1	pseudogene	1	0.884173
chr22	20110821	20111875	1054	-	ENSG00000243762.1	antisense	AC006547.8	OTTHUMG00000150489.2	lncRNA	1	0.948767
chr22	22103219	22104857	1638	+	ENSG00000225741.1	unprocessed_pseudogene	LL22NC03-88E1.17	OTTHUMG00000150843.1	pseudogene	1	0.610501
chr22	22370829	22371120	291	+	ENSG00000232603.1	unprocessed_pseudogene	LL22NC03-22A12.12	OTTHUMG00000151055.1	pseudogene	1	3.43643
chr22	22692778	22693312	534	-	ENSG00000223999.1	lincRNA	LL22NC03-102D1.18	OTTHUMG00000151209.1	lincRNA	1	1.87266
chr22	23322543	23322927	384	-	ENSG00000214526.3	processed_pseudogene	AP000343.1	OTTHUMG00000150656.1	pseudogene	1	2.60417
chr22	23433564	23435071	1507	+	ENSG00000234928.1	lincRNA	AP000344.3	OTTHUMG00000150668.1	lincRNA	1	0.66357
chr22	25048967	25051966	2999	-	ENSG00000279006.1	antisense	CTA-243E7.2	OTTHUMG00000189170.1	lncRNA	2	0.666889
chr22	25179309	25179554	245	-	ENSG00000271181.1	processed_pseudogene	CTA-221G9.10	OTTHUMG00000150902.2	pseudogene	1	4.08163
chr22	29608900	29609501	601	+	ENSG00000233010.1	processed_pseudogene	RPEP4	OTTHUMG00000155625.1	pseudogene	1	1.66389
chr22	30246205	30246998	793	+	ENSG00000268812.3	antisense	RP1-102K2.8	OTTHUMG00000186198.1	lncRNA	1	1.26103
chr22	31082156	31083565	1409	-	ENSG00000273387.1	antisense	RP3-412A9.16	OTTHUMG00000186126.1	lncRNA	1	0.709723
chr22	32583300	32584204	904	+	ENSG00000236054.1	antisense	LL22NC03-104C7.1	OTTHUMG00000058269.1	lncRNA	1	1.10619
chr22	36175857	36176526	669	+	ENSG00000237129.1	processed_pseudogene	Z95114.7	OTTHUMG00000150638.1	pseudogene	1	1.49477
chr22	42278188	42278846	658	+	ENSG00000273366.1	lincRNA	CTA-989H11.1	OTTHUMG00000186179.1	lincRNA	1	1.51976
chrX	28659065	28659469	404	-	ENSG00000226436.1	processed_pseudogene	RP1-22N22.1	OTTHUMG00000021314.1	pseudogene	1	2.47525
chrX	36985523	36986093	570	-	ENSG00000231069.1	unprocessed_pseudogene	BX842568.4	OTTHUMG00000024027.1	pseudogene	1	1.75439
chrX	41275739	41276778	1039	+	ENSG00000223714.1	lincRNA	RP5-1172N10.2	OTTHUMG00000021366.1	lincRNA	1	0.962464
chrX	45632292	45633733	1441	-	ENSG00000214282.3	processed_pseudogene	KRT8P14	OTTHUMG00000021407.2	pseudogene	1	0.693963
chrX	45951762	45952333	571	-	ENSG00000224701.1	processed_pseudogene	MED28P4	OTTHUMG00000021412.1	pseudogene	1	1.75131
chrX	47156638	47158199	1561	-	ENSG00000237351.1	processed_pseudogene	CTD-2522E6.4	OTTHUMG00000021434.1	pseudogene	1	0.640615
chrX	49876724	49879241	2517	-	ENSG00000234390.4	lincRNA	USP27X-AS1	OTTHUMG00000024154.2	lincRNA	2	0.794597
chrX	49911620	49912362	742	-	ENSG00000220132.1	processed_pseudogene	AF238380.8	OTTHUMG00000048045.1	pseudogene	1	1.34771
chrX	85851575	85851682	107	-	ENSG00000276892.1	processed_pseudogene	RP1-93L7.4	OTTHUMG00000188095.1	pseudogene	1	9.34579
chrX	103687284	103691772	4488	+	ENSG00000231154.1	antisense	MORF4L2-AS1	OTTHUMG00000022108.2	lncRNA	3	0.668449
chrX	103917411	103919548	2137	-	ENSG00000231728.3	antisense	LL0XNC01-116E7.2	OTTHUMG00000022115.3	lncRNA	2	0.935891
chrX	104803915	104804440	525	+	ENSG00000223733.1	processed_pseudogene	RPL18AP14	OTTHUMG00000022128.1	pseudogene	1	1.90476
chrX	107272582	107273656	1074	+	ENSG00000204053.6	processed_pseudogene	MYCLP1	OTTHUMG00000022162.3	pseudogene	1	0.931099
chrX	130330857	130331069	212	+	ENSG00000225046.2	processed_pseudogene	RP1-20I3.3	OTTHUMG00000022396.2	pseudogene	1	4.71698
chrX	131803312	131803741	429	-	ENSG00000228089.1	processed_pseudogene	PNKDP1	OTTHUMG00000022418.1	pseudogene	1	2.331
chrX	140091743	140092561	818	+	ENSG00000230707.1	processed_pseudogene	RP11-364B14.3	OTTHUMG00000022542.1	pseudogene	1	1.22249
chrX	149649174	149650124	950	-	ENSG00000229322.1	processed_pseudogene	RP5-937E21.1	OTTHUMG00000022624.2	pseudogene	1	1.05263
chrX	153662162	153662692	530	+	ENSG00000237793.3	processed_pseudogene	RPL18AP16	OTTHUMG00000024214.3	pseudogene	1	1.88679

## Sheet: A549
chromosome	start	end	width	strand	gene id	gene type	gene name	havana gene	biotype	CTCF count	CTCF density
chr1	2049203	2050070	867	-	ENSG00000226969.1	antisense	RP11-547D24.3	OTTHUMG00000041087.1	lncRNA	1	1.1534
chr1	6204840	6205780	940	-	ENSG00000226944.1	antisense	RP1-120G22.11	OTTHUMG00000041452.1	lncRNA	2	2.12766
chr1	6393555	6394391	836	+	ENSG00000271746.1	antisense	RP1-202O8.3	OTTHUMG00000185645.1	lncRNA	1	1.19617
chr1	8878835	8879894	1059	+	ENSG00000230679.1	antisense	ENO1-AS1	OTTHUMG00000001779.1	lncRNA	1	0.944287
chr1	10429881	10430677	796	-	ENSG00000271989.1	antisense	RP4-736L20.3	OTTHUMG00000185648.1	lncRNA	1	1.25628
chr1	16888538	16889649	1111	-	ENSG00000238142.1	lincRNA	RP11-108M9.4	OTTHUMG00000002204.1	lincRNA	1	0.90009
chr1	16889095	16889602	507	+	ENSG00000235241.1	processed_pseudogene	RP11-108M9.5	OTTHUMG00000002205.1	pseudogene	1	1.97239
chr1	20732880	20733952	1072	+	ENSG00000233069.1	antisense	RP5-930J4.2	OTTHUMG00000002621.1	lncRNA	1	0.932836
chr1	23949016	23949383	367	-	ENSG00000230228.2	processed_pseudogene	RP11-4M23.4	OTTHUMG00000013896.2	pseudogene	1	2.7248
chr1	25247837	25248321	484	+	ENSG00000272432.1	lincRNA	RP3-465N24.6	OTTHUMG00000185697.1	lincRNA	1	2.06612
chr1	44103306	44104703	1397	-	ENSG00000271647.1	processed_pseudogene	KRT8P47	OTTHUMG00000184285.1	pseudogene	1	0.71582
chr1	47179250	47180339	1089	+	ENSG00000224805.2	antisense	LINC00853	OTTHUMG00000007850.2	lncRNA	1	0.918274
chr1	53291791	53292138	347	-	ENSG00000225030.1	sense_intronic	RP4-784A16.3	OTTHUMG00000008933.1	lncRNA	1	2.88184
chr1	62530636	62530873	237	+	ENSG00000270549.1	processed_pseudogene	RP11-293K19.1	OTTHUMG00000184290.1	pseudogene	1	4.21941
chr1	68161761	68163090	1329	-	ENSG00000234383.1	processed_pseudogene	CTBP2P8	OTTHUMG00000009154.1	pseudogene	1	0.752445
chr1	86703502	86704462	960	-	ENSG00000261737.1	antisense	RP4-612B15.3	OTTHUMG00000175864.1	lncRNA	1	1.04167
chr1	92749175	92749330	155	-	ENSG00000234202.2	processed_pseudogene	RP11-330C7.4	OTTHUMG00000010893.2	pseudogene	1	6.45161
chr1	108199926	108201491	1565	+	ENSG00000260879.1	antisense	RP11-483I13.5	OTTHUMG00000175898.1	lncRNA	1	0.638978
chr1	110963302	110964649	1347	+	ENSG00000273010.1	antisense	RP11-96K19.5	OTTHUMG00000186361.1	lncRNA	2	1.48478
chr1	119886304	119886927	623	+	ENSG00000226446.1	processed_pseudogene	NOTCH2P1	OTTHUMG00000057603.1	pseudogene	1	1.60514
chr1	147840962	147842359	1397	+	ENSG00000223728.3	processed_pseudogene	RP11-314N2.2	OTTHUMG00000037548.2	pseudogene	1	0.71582
chr1	150255095	150257286	2191	-	ENSG00000276110.1	antisense	RP4-790G17.7	OTTHUMG00000185690.2	lncRNA	2	0.912825
chr1	151340648	151341966	1318	+	ENSG00000224645.1	antisense	RP11-126K1.8	OTTHUMG00000073673.1	lncRNA	1	0.758725
chr1	154480012	154481501	1489	+	ENSG00000273110.1	antisense	RP11-350G8.9	OTTHUMG00000186422.1	lncRNA	1	0.671592
chr1	154937370	154938059	689	+	ENSG00000270361.1	lincRNA	RP11-307C12.13	OTTHUMG00000185167.1	lincRNA	1	1.45138
chr1	154961825	154962623	798	+	ENSG00000271380.1	antisense	RP11-307C12.12	OTTHUMG00000185142.1	lncRNA	1	1.25313
chr1	157073257	157074703	1446	+	ENSG00000224520.2	processed_pseudogene	KRT8P45	OTTHUMG00000041329.2	pseudogene	1	0.691563
chr1	160776975	160780140	3165	-	ENSG00000274562.1	unprocessed_pseudogene	RP11-404F10.5	OTTHUMG00000187540.1	pseudogene	2	0.631912
chr1	178724306	178726285	1979	-	ENSG00000273062.1	antisense	RP11-428K3.1	OTTHUMG00000186473.1	lncRNA	2	1.01061
chr1	179447578	179448440	862	-	ENSG00000224620.2	processed_pseudogene	MEF2AP1	OTTHUMG00000035267.2	pseudogene	1	1.16009
chr1	181190471	181191149	678	-	ENSG00000225359.1	lincRNA	RP11-540K16.2	OTTHUMG00000035181.1	lincRNA	1	1.47493
chr1	201222113	201223123	1010	-	ENSG00000229821.1	antisense	RP11-567E21.3	OTTHUMG00000040658.1	lncRNA	1	0.990099
chr1	206907619	206908229	610	+	ENSG00000226945.1	processed_pseudogene	RP11-564A8.4	OTTHUMG00000036458.1	pseudogene	1	1.63934
chr1	227234269	227235355	1086	+	ENSG00000228729.1	processed_pseudogene	RP11-211A18.2	OTTHUMG00000037614.1	pseudogene	1	0.92081
chr1	229270927	229271599	672	-	ENSG00000240524.2	transcribed_processed_pseudogene	RP5-1061H20.3	OTTHUMG00000037659.2	pseudogene	1	1.4881
chr1	230280312	230281893	1581	-	ENSG00000224407.1	antisense	RP5-956O18.3	OTTHUMG00000037756.1	lncRNA	1	0.632511
chr1	234979647	234980804	1157	-	ENSG00000258082.1	lincRNA	RP11-443B7.3	OTTHUMG00000170191.1	lincRNA	1	0.864304
chr1	235104180	235104609	429	-	ENSG00000273416.1	lincRNA	RP4-597N16.4	OTTHUMG00000185835.1	lincRNA	1	2.331
chr1	247936061	247937513	1452	-	ENSG00000226191.3	processed_pseudogene	CLK3P2	OTTHUMG00000040208.2	pseudogene	1	0.688705
chr2	7671604	7672246	642	-	ENSG00000230515.1	lincRNA	AC092580.3	OTTHUMG00000151592.1	lincRNA	1	1.55763
chr2	12715415	12716227	812	+	ENSG00000261117.1	lincRNA	RP11-333O1.1	OTTHUMG00000175731.1	lincRNA	1	1.23153
chr2	25856461	25856966	505	-	ENSG00000218682.1	processed_pseudogene	AC010150.1	OTTHUMG00000152174.1	pseudogene	1	1.9802
chr2	28396815	28397110	295	+	ENSG00000270640.1	sense_intronic	RP11-373D23.2	OTTHUMG00000185291.1	lncRNA	1	3.38983
chr2	38535258	38536249	991	-	ENSG00000271443.1	transcribed_processed_pseudogene	RP11-541E12.1	OTTHUMG00000184445.1	pseudogene	1	1.00908
chr2	43227210	43228855	1645	+	ENSG00000279873.2	lincRNA	LINC01126	OTTHUMG00000152397.3	lincRNA	2	1.21581
chr2	45168583	45169414	831	+	ENSG00000231054.1	lincRNA	AC009236.2	OTTHUMG00000152442.1	lincRNA	1	1.20337
chr2	48440043	48440597	554	-	ENSG00000272663.1	lincRNA	RP11-191L17.1	OTTHUMG00000185920.2	lincRNA	1	1.80505
chr2	55617909	55618373	464	+	ENSG00000272606.1	antisense	RP11-554J4.1	OTTHUMG00000185926.1	lncRNA	1	2.15517
chr2	58241349	58241686	337	+	ENSG00000273063.1	antisense	RP11-334G22.1	OTTHUMG00000185927.1	lncRNA	1	2.96736
chr2	64644612	64646698	2086	+	ENSG00000226756.1	lincRNA	AC007365.3	OTTHUMG00000152702.1	lincRNA	2	0.958773
chr2	70301451	70302072	621	+	ENSG00000233849.1	antisense	AC022201.5	OTTHUMG00000154180.1	lncRNA	1	1.61031
chr2	94961047	94961503	456	-	ENSG00000232594.1	unprocessed_pseudogene	AC103563.3	OTTHUMG00000155164.1	pseudogene	1	2.19298
chr2	95413456	95414296	840	-	ENSG00000248821.1	unprocessed_pseudogene	AC009238.6	OTTHUMG00000155175.1	pseudogene	1	1.19048
chr2	106543014	106544297	1283	+	ENSG00000232001.1	lincRNA	AC108868.6	OTTHUMG00000153180.1	lincRNA	1	0.779423
chr2	109127327	109128930	1603	-	ENSG00000259863.1	lincRNA	SH3RF3-AS1	OTTHUMG00000153437.1	lincRNA	1	0.62383
chr2	111887914	111888741	827	+	ENSG00000236307.2	processed_pseudogene	EEF1E1P1	OTTHUMG00000153261.2	pseudogene	1	1.20919
chr2	127024252	127025723	1471	-	ENSG00000260634.1	lincRNA	RP11-521O16.1	OTTHUMG00000176160.1	lincRNA	2	1.35962
chr2	130427731	130429225	1494	+	ENSG00000230646.1	processed_pseudogene	KLF2P2	OTTHUMG00000153926.1	pseudogene	1	0.669344
chr2	130692243	130693770	1527	-	ENSG00000223349.1	processed_pseudogene	KLF2P3	OTTHUMG00000154048.2	pseudogene	1	0.654879
chr2	130776646	130776957	311	+	ENSG00000232503.1	processed_pseudogene	CYCSP8	OTTHUMG00000154067.1	pseudogene	1	3.21543
chr2	132037787	132037993	206	-	ENSG00000226886.1	processed_pseudogene	AC093787.1	OTTHUMG00000153595.1	pseudogene	1	4.85437
chr2	169767185	169768799	1614	-	ENSG00000231550.1	processed_pseudogene	PTCHD3P2	OTTHUMG00000154119.1	pseudogene	1	0.619579
chr2	169790093	169790885	792	+	ENSG00000214369.2	processed_pseudogene	AC009967.3	OTTHUMG00000153985.1	pseudogene	1	1.26263
chr2	172427774	172428603	829	-	ENSG00000226963.1	antisense	AC078883.4	OTTHUMG00000154231.1	lncRNA	1	1.20627
chr2	172464262	172466022	1760	-	ENSG00000232788.1	antisense	AC078883.3	OTTHUMG00000154089.1	lncRNA	2	1.13636
chr2	173431349	173431812	463	-	ENSG00000213148.3	processed_pseudogene	AC073465.1	OTTHUMG00000154105.1	pseudogene	1	2.15983
chr2	177197985	177198547	562	+	ENSG00000213069.3	processed_pseudogene	KRT8P40	OTTHUMG00000154099.3	pseudogene	1	1.77936
chr2	177264359	177265515	1156	+	ENSG00000222043.2	antisense	AC079305.10	OTTHUMG00000154178.1	lncRNA	1	0.865052
chr2	183071040	183072486	1446	-	ENSG00000231203.1	processed_pseudogene	KRT8P10	OTTHUMG00000154237.2	pseudogene	1	0.691563
chr2	189625443	189626259	816	-	ENSG00000276828.1	unprocessed_pseudogene	RP11-88L20.1	OTTHUMG00000187702.1	pseudogene	1	1.22549
chr2	189762704	189765556	2852	+	ENSG00000253559.1	antisense	OSGEPL1-AS1	OTTHUMG00000164097.1	lncRNA	2	0.701262
chr2	202032770	202033537	767	-	ENSG00000273209.1	lincRNA	RP11-107N15.1	OTTHUMG00000186300.1	lincRNA	1	1.30378
chr2	208255247	208256181	934	+	ENSG00000231908.1	antisense	IDH1-AS1	OTTHUMG00000154707.1	lncRNA	1	1.07066
chr2	208466238	208466626	388	-	ENSG00000227430.1	processed_pseudogene	AC019185.2	OTTHUMG00000154661.1	pseudogene	1	2.57732
chr2	218953401	218954050	649	-	ENSG00000224928.2	processed_pseudogene	KRT8P30	OTTHUMG00000154667.1	pseudogene	1	1.54083
chr2	222317242	222318653	1411	-	ENSG00000267034.1	lincRNA	RP11-384O8.1	OTTHUMG00000180633.1	lincRNA	1	0.708717
chr2	231452195	231453153	958	+	ENSG00000233538.1	lincRNA	AC017104.2	OTTHUMG00000153867.1	lincRNA	1	1.04384
chr2	232420661	232421461	800	-	ENSG00000237087.1	lincRNA	AC068134.6	OTTHUMG00000153335.1	lincRNA	1	1.25
chr2	241724615	241725693	1078	-	ENSG00000235351.1	antisense	AC114730.11	OTTHUMG00000151506.1	lncRNA	1	0.927644
chr2	241734715	241735498	783	-	ENSG00000215692.2	antisense	AC114730.8	OTTHUMG00000151478.1	lncRNA	1	1.27714
chr2	241844380	241845036	656	+	ENSG00000235151.1	lincRNA	AC114730.2	OTTHUMG00000151392.1	lincRNA	1	1.52439
chr3	12787393	12788671	1278	-	ENSG00000213943.3	processed_pseudogene	KRT18P17	OTTHUMG00000155395.1	pseudogene	1	0.782473
chr3	13926813	13927778	965	+	ENSG00000233121.1	unitary_pseudogene	VN1R20P	OTTHUMG00000154485.1	pseudogene	1	1.03627
chr3	25441164	25441502	338	-	ENSG00000229421.1	processed_pseudogene	AC133141.1	OTTHUMG00000155597.2	pseudogene	1	2.95858
chr3	26712307	26713364	1057	+	ENSG00000234165.1	lincRNA	AC114877.3	OTTHUMG00000155686.1	lincRNA	1	0.946074
chr3	40970541	40971578	1037	-	ENSG00000233096.1	lincRNA	RP11-520A21.1	OTTHUMG00000156006.1	lincRNA	1	0.96432
chr3	49029316	49029706	390	+	ENSG00000272434.1	antisense	RP13-131K19.6	OTTHUMG00000185526.1	lncRNA	1	2.5641
chr3	57078943	57080101	1158	+	ENSG00000272202.1	antisense	RP11-157F20.3	OTTHUMG00000185634.1	lncRNA	1	0.863558
chr3	70753854	70754573	719	+	ENSG00000243873.1	processed_pseudogene	HMGB1P36	OTTHUMG00000158798.1	pseudogene	1	1.39082
chr3	109396616	109397870	1254	+	ENSG00000244561.1	processed_pseudogene	RP11-702L6.1	OTTHUMG00000159214.1	pseudogene	1	0.797448
chr3	131526447	131527179	732	+	ENSG00000248530.1	processed_pseudogene	BCL2L12P1	OTTHUMG00000159630.2	pseudogene	1	1.36612
chr3	138101478	138102917	1439	-	ENSG00000240668.1	processed_pseudogene	KRT8P36	OTTHUMG00000159822.1	pseudogene	1	0.694927
chr3	156671862	156674378	2516	-	ENSG00000243926.1	antisense	TIPARP-AS1	OTTHUMG00000158643.1	lncRNA	2	0.794913
chr3	157162663	157163932	1269	-	ENSG00000244515.1	processed_pseudogene	KRT18P34	OTTHUMG00000158716.1	pseudogene	1	0.788022
chr3	170062244	170062951	707	+	ENSG00000242583.1	processed_pseudogene	RP11-379K17.9	OTTHUMG00000158778.1	pseudogene	1	1.41443
chr3	170495627	170496636	1009	+	ENSG00000241416.1	processed_pseudogene	KRT8P13	OTTHUMG00000158860.1	pseudogene	1	0.99108
chr3	179649494	179650200	706	-	ENSG00000243977.1	processed_pseudogene	RP11-473P24.2	OTTHUMG00000157785.1	pseudogene	1	1.41643
chr3	196631498	196632587	1089	-	ENSG00000232065.1	antisense	LINC01063	OTTHUMG00000155570.1	lncRNA	1	0.918274
chr4	6687448	6690519	3071	-	ENSG00000246526.2	lincRNA	RP11-539L10.2	OTTHUMG00000160124.2	lincRNA	2	0.651254
chr4	26859806	26860599	793	-	ENSG00000240005.5	antisense	RP11-293A21.1	OTTHUMG00000159680.2	lncRNA	1	1.26103
chr4	76756960	76758474	1514	-	ENSG00000233860.1	antisense	RP11-359D14.2	OTTHUMG00000157074.3	lncRNA	1	0.660502
chr4	81919995	81920387	392	-	ENSG00000248448.2	processed_pseudogene	COX5BP1	OTTHUMG00000160936.2	pseudogene	1	2.55102
chr4	82275071	82276600	1529	+	ENSG00000234568.3	processed_pseudogene	BIN2P1	OTTHUMG00000160953.1	pseudogene	1	0.654022
chr4	101347780	101348883	1103	+	ENSG00000254531.1	lincRNA	FLJ20021	OTTHUMG00000166283.1	lincRNA	1	0.906618
chr4	128069014	128069612	598	-	ENSG00000241651.4	processed_pseudogene	RP11-214O14.1	OTTHUMG00000157552.2	pseudogene	1	1.67224
chr4	135371177	135371924	747	-	ENSG00000250834.1	processed_pseudogene	KRT18P54	OTTHUMG00000161222.1	pseudogene	1	1.33869
chr4	139556799	139557643	844	+	ENSG00000272717.1	antisense	RP11-342I1.2	OTTHUMG00000186389.1	lncRNA	1	1.18483
chr4	140756528	140757921	1393	+	ENSG00000273472.1	lincRNA	RP11-102N12.3	OTTHUMG00000186399.1	lincRNA	1	0.717875
chr4	146241806	146243669	1863	+	ENSG00000251010.1	antisense	RP11-6L6.7	OTTHUMG00000162030.1	lncRNA	2	1.07354
chr4	155206529	155209027	2498	-	ENSG00000250538.5	antisense	RP11-92A5.2	OTTHUMG00000161487.1	lncRNA	2	0.800641
chr4	157204462	157204855	393	-	ENSG00000249819.1	processed_pseudogene	RP11-392C20.1	OTTHUMG00000161953.1	pseudogene	1	2.54453
chr4	165016887	165017433	546	+	ENSG00000276623.1	processed_pseudogene	RP11-366M4.19	OTTHUMG00000187585.1	pseudogene	1	1.8315
chr4	185471516	185472263	747	+	ENSG00000249679.1	antisense	RP11-279O9.4	OTTHUMG00000160454.1	lncRNA	1	1.33869
chr5	10627260	10628225	965	-	ENSG00000250106.1	antisense	ANKRD33B-AS1	OTTHUMG00000162124.1	lncRNA	1	1.03627
chr5	14872332	14872713	381	+	ENSG00000272057.1	lincRNA	CTB-40H15.4	OTTHUMG00000185443.1	lincRNA	1	2.62467
chr5	17620533	17620939	406	-	ENSG00000250351.1	processed_pseudogene	RP11-432M8.10	OTTHUMG00000161841.1	pseudogene	1	2.46305
chr5	23303565	23305143	1578	-	ENSG00000250332.1	processed_pseudogene	CTD-2272G21.2	OTTHUMG00000161923.1	pseudogene	1	0.633714
chr5	32522758	32523865	1107	+	ENSG00000249142.1	processed_pseudogene	CTD-2290P7.1	OTTHUMG00000161977.1	pseudogene	1	0.903342
chr5	33997044	33997724	680	-	ENSG00000250767.1	processed_pseudogene	RP11-1084J3.3	OTTHUMG00000162528.1	pseudogene	1	1.47059
chr5	43231812	43233173	1361	-	ENSG00000247763.2	processed_pseudogene	RP11-447H19.1	OTTHUMG00000162228.2	pseudogene	1	0.734754
chr5	73152416	73152938	522	-	ENSG00000250747.1	processed_pseudogene	RP11-232L2.1	OTTHUMG00000162493.1	pseudogene	1	1.91571
chr5	74865893	74867854	1961	+	ENSG00000271714.1	antisense	CTD-2377O17.1	OTTHUMG00000185527.1	lncRNA	2	1.01989
chr5	88602780	88603117	337	+	ENSG00000250705.1	processed_pseudogene	CTC-470C15.1	OTTHUMG00000162633.1	pseudogene	1	2.96736
chr5	95834424	95835046	622	-	ENSG00000251000.1	processed_pseudogene	AC008592.3	OTTHUMG00000162736.1	pseudogene	1	1.60772
chr5	112419583	112420978	1395	+	ENSG00000278921.2	lincRNA	EPB41L4A-AS2	OTTHUMG00000169519.1	lincRNA	1	0.716846
chr5	115770586	115770989	403	+	ENSG00000251118.1	processed_pseudogene	CTC-505O3.1	OTTHUMG00000162915.2	pseudogene	1	2.48139
chr5	116083807	116085416	1609	-	ENSG00000271918.1	antisense	CTD-2287O16.5	OTTHUMG00000185552.1	lncRNA	1	0.621504
chr5	139648999	139649728	729	-	ENSG00000250635.1	lincRNA	CTD-3224K15.2	OTTHUMG00000163330.1	lincRNA	1	1.37174
chr5	139775305	139775472	167	+	ENSG00000271792.1	lincRNA	CTB-35F21.5	OTTHUMG00000185580.1	lincRNA	1	5.98802
chr5	140875346	140875922	576	-	ENSG00000278915.1	antisense	AC005609.18	OTTHUMG00000189138.1	lncRNA	1	1.73611
chr5	141350109	141350662	553	-	ENSG00000280026.1	antisense	AC005618.8	OTTHUMG00000189141.1	lncRNA	1	1.80832
chr5	146706381	146707600	1219	-	ENSG00000248568.1	processed_pseudogene	KRT8P48	OTTHUMG00000163409.1	pseudogene	1	0.820345
chr5	149430286	149432834	2548	+	ENSG00000269936.3	lincRNA	RP11-394O4.5	OTTHUMG00000184101.1	lincRNA	2	0.784929
chr5	151319422	151319776	354	+	ENSG00000270904.1	processed_pseudogene	CTC-224D3.1	OTTHUMG00000184553.1	pseudogene	1	2.82486
chr5	159950493	159951498	1005	-	ENSG00000248626.1	processed_pseudogene	GAPDHP40	OTTHUMG00000159985.1	pseudogene	1	0.995025
chr5	173144162	173145039	877	-	ENSG00000253172.1	antisense	CTC-209H22.3	OTTHUMG00000163320.1	lncRNA	2	2.2805
chr5	176006145	176007387	1242	+	ENSG00000272494.1	unprocessed_pseudogene	OR1X1P	OTTHUMG00000185807.1	pseudogene	1	0.805153
chr5	177554824	177555364	540	+	ENSG00000272459.1	lincRNA	RP11-1277A3.3	OTTHUMG00000185636.1	lincRNA	1	1.85185
chr5	177836434	177837646	1212	-	ENSG00000214351.5	unprocessed_pseudogene	OR1X5P	OTTHUMG00000154337.1	pseudogene	1	0.825083
chr6	524171	525581	1410	+	ENSG00000230433.1	antisense	RP1-20B11.2	OTTHUMG00000014117.2	lncRNA	1	0.70922
chr6	2910613	2912113	1500	-	ENSG00000232999.1	unitary_pseudogene	RP1-90J20.10	OTTHUMG00000155040.1	pseudogene	1	0.666667
chr6	2987967	2991173	3206	+	ENSG00000244041.7	lincRNA	LINC01011	OTTHUMG00000014128.5	lincRNA	2	0.62383
chr6	3068045	3068894	849	-	ENSG00000272277.1	antisense	RP1-40E16.12	OTTHUMG00000185651.1	lncRNA	1	1.17786
chr6	3978062	3979099	1037	+	ENSG00000216657.1	processed_pseudogene	GLRX3P2	OTTHUMG00000014155.1	pseudogene	1	0.96432
chr6	6758276	6759291	1015	-	ENSG00000224532.2	lincRNA	RP3-470L22.1	OTTHUMG00000014193.2	lincRNA	1	0.985222
chr6	7338839	7339568	729	-	ENSG00000220472.1	processed_pseudogene	RP11-69L16.5	OTTHUMG00000014205.1	pseudogene	1	1.37174
chr6	13486294	13486852	558	+	ENSG00000237786.1	antisense	GFOD1-AS1	OTTHUMG00000014274.1	lncRNA	1	1.79211
chr6	15247815	15248634	819	-	ENSG00000235488.1	antisense	JARID2-AS1	OTTHUMG00000014292.1	lncRNA	1	1.221
chr6	16761138	16762652	1514	+	ENSG00000229931.1	antisense	RP1-151F17.1	OTTHUMG00000153136.1	lncRNA	1	0.660502
chr6	21522476	21523772	1296	-	ENSG00000231754.1	lincRNA	RP11-204E9.1	OTTHUMG00000014342.1	lincRNA	1	0.771605
chr6	25882026	25882395	369	-	ENSG00000242387.1	transcribed_processed_pseudogene	HIST1H2APS2	OTTHUMG00000187599.1	pseudogene	1	2.71003
chr6	26321876	26322292	416	-	ENSG00000220875.1	processed_pseudogene	HIST1H3PS1	OTTHUMG00000014455.1	pseudogene	1	2.40385
chr6	27807075	27807339	264	+	ENSG00000217862.2	processed_pseudogene	HIST1H4PS1	OTTHUMG00000016429.2	pseudogene	1	3.78788
chr6	28837869	28839006	1137	-	ENSG00000225173.1	lincRNA	XXbac-BPG308K3.5	OTTHUMG00000084883.1	lincRNA	1	0.879507
chr6	28896530	28897322	792	+	ENSG00000224157.1	antisense	HCG14	OTTHUMG00000031281.1	lncRNA	1	1.26263
chr6	29071824	29072599	775	-	ENSG00000236909.1	unprocessed_pseudogene	OR2P1P	OTTHUMG00000031042.3	pseudogene	1	1.29032
chr6	29791753	29792750	997	-	ENSG00000176998.4	unprocessed_pseudogene	HCG4	OTTHUMG00000035423.2	pseudogene	1	1.00301
chr6	34189780	34191079	1299	+	ENSG00000271231.1	processed_pseudogene	KRT18P9	OTTHUMG00000184543.1	pseudogene	1	0.769823
chr6	45421079	45422005	926	-	ENSG00000271857.1	antisense	RP1-244F24.1	OTTHUMG00000185755.1	lncRNA	1	1.07991
chr6	63440766	63443580	2814	+	ENSG00000218048.2	unprocessed_pseudogene	RP3-407E4.4	OTTHUMG00000014945.2	pseudogene	2	0.710732
chr6	63571005	63572408	1403	-	ENSG00000266680.1	antisense	RP5-1148A21.3	OTTHUMG00000179475.1	lncRNA	1	0.712758
chr6	72522641	72523238	597	+	ENSG00000217483.1	processed_pseudogene	RP11-135M8__A.1	OTTHUMG00000015011.1	pseudogene	1	1.67504
chr6	85659892	85660606	714	-	ENSG00000220563.1	processed_pseudogene	PKMP3	OTTHUMG00000015143.1	pseudogene	1	1.40056
chr6	105302453	105302823	370	-	ENSG00000219902.1	processed_pseudogene	RPL35P3	OTTHUMG00000015294.1	pseudogene	1	2.7027
chr6	109382795	109383666	871	+	ENSG00000260273.1	antisense	RP11-425D10.10	OTTHUMG00000175937.1	lncRNA	1	1.14811
chr6	126627484	126628570	1086	-	ENSG00000275953.1	processed_pseudogene	RP11-753G20.2	OTTHUMG00000187640.1	pseudogene	1	0.92081
chr6	138402585	138403560	975	-	ENSG00000215878.3	processed_pseudogene	MARCKSL1P2	OTTHUMG00000015672.2	pseudogene	1	1.02564
chr6	152898047	152899280	1233	+	ENSG00000217372.2	processed_pseudogene	TUBB4BP7	OTTHUMG00000015853.2	pseudogene	1	0.81103
chr6	156662050	156662437	387	+	ENSG00000220347.1	processed_pseudogene	RP11-230C9.1	OTTHUMG00000015886.1	pseudogene	1	2.58398
chr6	157323964	157324477	513	+	ENSG00000271040.1	lincRNA	RP5-933K21.3	OTTHUMG00000185283.1	lincRNA	1	1.94932
chr6	166275462	166277077	1615	-	ENSG00000280850.1	lincRNA	RP4-655C5.9	OTTHUMG00000190284.1	lincRNA	1	0.619195
chr6	167767083	167768568	1485	-	ENSG00000213065.2	processed_pseudogene	RP3-431P23.2	OTTHUMG00000016028.1	pseudogene	1	0.673401
chr6	167823876	167826709	2833	-	ENSG00000198221.8	lincRNA	MLLT4-AS1	OTTHUMG00000016029.2	lincRNA	2	0.705965
chr6	168225279	168226517	1238	-	ENSG00000237987.1	lincRNA	RP11-503C24.2	OTTHUMG00000016041.1	lincRNA	1	0.807754
chr7	8262233	8262821	588	+	ENSG00000244239.1	antisense	AC007009.1	OTTHUMG00000152018.1	lncRNA	1	1.70068
chr7	12685637	12686033	396	+	ENSG00000271253.1	processed_pseudogene	CTD-2320J21.1	OTTHUMG00000184480.1	pseudogene	1	2.52525
chr7	22725395	22727620	2225	-	ENSG00000179428.2	antisense	AC073072.5	OTTHUMG00000152547.1	lncRNA	2	0.898876
chr7	28615097	28615888	791	-	ENSG00000225286.1	processed_pseudogene	AC005105.2	OTTHUMG00000152816.1	pseudogene	1	1.26422
chr7	35971147	35971567	420	-	ENSG00000270889.1	processed_pseudogene	RP11-609L3.1	OTTHUMG00000184662.1	pseudogene	1	2.38095
chr7	55593777	55595006	1229	+	ENSG00000231394.1	lincRNA	RP11-310H4.3	OTTHUMG00000156122.1	lincRNA	1	0.81367
chr7	65235790	65236723	933	-	ENSG00000237026.1	processed_pseudogene	RP11-328P23.2	OTTHUMG00000156728.1	pseudogene	1	1.07181
chr7	105013425	105014321	896	-	ENSG00000239569.3	antisense	KMT2E-AS1	OTTHUMG00000157280.1	lncRNA	1	1.11607
chr7	121398452	121398767	315	+	ENSG00000213310.3	processed_pseudogene	CYCSP19	OTTHUMG00000157004.1	pseudogene	1	3.1746
chr7	131753746	131754252	506	-	ENSG00000236281.1	processed_pseudogene	AC093106.5	OTTHUMG00000155054.1	pseudogene	1	1.97628
chr7	135168403	135169547	1144	+	ENSG00000272941.1	antisense	RP11-134L10.1	OTTHUMG00000186343.1	lncRNA	1	0.874126
chr7	143379692	143380495	803	-	ENSG00000232533.1	antisense	AC093673.5	OTTHUMG00000152694.1	lncRNA	1	1.24533
chr7	151028781	151029754	973	-	ENSG00000243433.1	antisense	RP11-148K1.10	OTTHUMG00000158684.1	lncRNA	1	1.02775
chr8	11553224	11554207	983	-	ENSG00000254774.1	antisense	RP11-148O21.3	OTTHUMG00000165415.1	lncRNA	1	1.01729
chr8	18387108	18387777	669	-	ENSG00000271654.1	processed_pseudogene	RP11-685B14.3	OTTHUMG00000184844.1	pseudogene	1	1.49477
chr8	22565997	22567171	1174	-	ENSG00000254230.1	antisense	RP11-582J16.3	OTTHUMG00000163842.1	lncRNA	1	0.851789
chr8	24956621	24957110	489	+	ENSG00000272157.1	antisense	CTD-2168K21.2	OTTHUMG00000185425.1	lncRNA	1	2.04499
chr8	30082758	30083467	709	+	ENSG00000272256.1	antisense	RP11-489E7.4	OTTHUMG00000185429.1	lncRNA	1	1.41044
chr8	31497423	31498612	1189	+	ENSG00000253275.1	lincRNA	RP11-566H8.1	OTTHUMG00000163914.1	lincRNA	1	0.841043
chr8	38400536	38401683	1147	-	ENSG00000254981.1	antisense	RP11-350N15.3	OTTHUMG00000165098.1	lncRNA	1	0.87184
chr8	38844866	38846439	1573	-	ENSG00000253829.1	antisense	RP11-723D22.3	OTTHUMG00000164087.1	lncRNA	1	0.635728
chr8	41828165	41829934	1769	-	ENSG00000260588.1	lincRNA	RP11-930P14.2	OTTHUMG00000164085.2	lincRNA	2	1.13058
chr8	42151772	42152763	991	-	ENSG00000261449.1	antisense	RP11-589C21.5	OTTHUMG00000173375.1	lncRNA	1	1.00908
chr8	43247191	43247410	219	+	ENSG00000255166.1	processed_pseudogene	RP11-726G23.11	OTTHUMG00000165528.1	pseudogene	1	4.56621
chr8	43276270	43276823	553	-	ENSG00000234713.3	processed_pseudogene	RP11-726G23.10	OTTHUMG00000164109.1	pseudogene	1	1.80832
chr8	47194002	47194347	345	-	ENSG00000253502.1	processed_pseudogene	ATP6V1G1P2	OTTHUMG00000164147.1	pseudogene	1	2.89855
chr8	47511034	47512141	1107	-	ENSG00000253330.1	processed_pseudogene	RP11-697N18.3	OTTHUMG00000164177.1	pseudogene	2	1.80668
chr8	56074592	56075274	682	+	ENSG00000253603.1	antisense	CTA-397H3.3	OTTHUMG00000164298.1	lncRNA	1	1.46628
chr8	81279871	81281446	1575	-	ENSG00000254027.1	antisense	RP11-363E6.3	OTTHUMG00000164598.1	lncRNA	1	0.634921
chr8	85177522	85178150	628	-	ENSG00000254208.1	antisense	RP11-219B4.3	OTTHUMG00000164786.1	lncRNA	1	1.59236
chr8	86481754	86483002	1248	-	ENSG00000250569.1	processed_pseudogene	NTAN1P2	OTTHUMG00000160478.1	pseudogene	1	0.801282
chr8	97788210	97788357	147	-	ENSG00000270682.1	processed_pseudogene	KB-1907C4.2	OTTHUMG00000184717.1	pseudogene	1	6.80272
chr8	109973943	109974781	838	+	ENSG00000255402.1	antisense	RP11-696P8.2	OTTHUMG00000165638.1	lncRNA	1	1.19332
chr8	122779971	122780830	859	-	ENSG00000272384.1	lincRNA	RP11-44N11.2	OTTHUMG00000185333.1	lincRNA	1	1.16414
chr8	123924759	123925933	1174	-	ENSG00000254000.1	lincRNA	RP11-245A18.1	OTTHUMG00000164999.1	lincRNA	1	0.851789
chr8	124996985	124998198	1213	-	ENSG00000253513.1	antisense	RP11-6D1.3	OTTHUMG00000164989.1	lncRNA	1	0.824402
chr8	126556896	126557433	537	+	ENSG00000254010.1	antisense	RP11-103H7.5	OTTHUMG00000165044.1	lncRNA	1	1.8622
chr8	140636281	140638283	2002	+	ENSG00000280303.2	lincRNA	ERICD	OTTHUMG00000164249.2	lincRNA	2	0.999001
chr8	143280161	143281690	1529	-	ENSG00000253716.5	antisense	LINC01604	OTTHUMG00000164976.1	lncRNA	1	0.654022
chr8	143788920	143790459	1539	+	ENSG00000214733.8	antisense	RP11-429J17.8	OTTHUMG00000165153.1	lncRNA	1	0.649773
chr8	144409492	144409976	484	+	ENSG00000272115.1	antisense	GS1-393G12.14	OTTHUMG00000185629.1	lncRNA	1	2.06612
chr8	144463817	144465101	1284	+	ENSG00000254578.1	antisense	CTD-2517M22.16	OTTHUMG00000165651.1	lncRNA	1	0.778816
chr9	14068932	14069417	485	+	ENSG00000213954.3	processed_pseudogene	ATP5HP3	OTTHUMG00000019568.2	pseudogene	1	2.06186
chr9	21394888	21396346	1458	-	ENSG00000261696.1	lincRNA	RP11-354P17.15	OTTHUMG00000175506.1	lincRNA	1	0.685871
chr9	21403081	21403651	570	+	ENSG00000235108.1	unprocessed_pseudogene	IFNA12P	OTTHUMG00000019678.1	pseudogene	1	1.75439
chr9	21455484	21456049	565	+	ENSG00000238271.2	unprocessed_pseudogene	IFNWP19	OTTHUMG00000019680.2	pseudogene	1	1.76991
chr9	30773464	30774732	1268	+	ENSG00000235626.2	processed_pseudogene	KRT18P66	OTTHUMG00000019729.1	pseudogene	1	0.788644
chr9	32333457	32334354	897	-	ENSG00000225347.1	processed_pseudogene	SLC25A5P8	OTTHUMG00000019739.1	pseudogene	1	1.11483
chr9	33719690	33722555	2865	+	ENSG00000227301.1	lincRNA	RP11-384P7.5	OTTHUMG00000000412.1	lincRNA	2	0.69808
chr9	34191555	34191881	326	+	ENSG00000227383.1	processed_pseudogene	RP11-571F15.2	OTTHUMG00000019811.2	pseudogene	1	3.06748
chr9	34546524	34546996	472	-	ENSG00000232983.2	processed_pseudogene	RP11-296L22.7	OTTHUMG00000000444.2	pseudogene	1	2.11864
chr9	35646270	35647099	829	+	ENSG00000227933.1	antisense	RP11-331F9.4	OTTHUMG00000019866.1	lncRNA	1	1.20627
chr9	35657751	35658018	267	-	ENSG00000269900.3	lincRNA	RMRP	OTTHUMG00000184014.1	lincRNA	1	3.74532
chr9	35756712	35757940	1228	-	ENSG00000228843.2	antisense	RP11-112J3.15	OTTHUMG00000019883.2	lncRNA	1	0.814332
chr9	69428248	69428721	473	-	ENSG00000243888.1	3prime_overlapping_ncrna	RP11-548B3.3	OTTHUMG00000019980.1	lncRNA	1	2.11416
chr9	69672749	69673713	964	+	ENSG00000261447.1	lincRNA	RP11-109D9.4	OTTHUMG00000175664.1	lincRNA	1	1.03734
chr9	76419934	76420631	697	+	ENSG00000233814.1	processed_pseudogene	RP11-66C24.1	OTTHUMG00000020042.1	pseudogene	1	1.43472
chr9	77176756	77177994	1238	-	ENSG00000232998.1	antisense	VPS13A-AS1	OTTHUMG00000020054.1	lncRNA	1	0.807754
chr9	98234709	98235567	858	+	ENSG00000224001.2	processed_pseudogene	RP11-270F18.2	OTTHUMG00000020342.2	pseudogene	1	1.1655
chr9	99183373	99184891	1518	+	ENSG00000227269.1	lincRNA	RP11-96L7.2	OTTHUMG00000020352.1	lincRNA	1	0.658762
chr9	127690098	127690840	742	-	ENSG00000279571.1	lincRNA	RP11-56D16.8	OTTHUMG00000189321.1	lincRNA	1	1.34771
chr9	129438216	129439118	902	+	ENSG00000226355.1	lincRNA	RP11-65J3.2	OTTHUMG00000020779.2	lincRNA	1	1.10865
chr9	132768965	132770212	1247	-	ENSG00000224992.2	sense_intronic	RP11-295G24.5	OTTHUMG00000020846.2	lncRNA	1	0.801925
chr9	134168769	134169340	571	+	ENSG00000273473.1	lincRNA	LL09NC01-139C3.1	OTTHUMG00000186052.1	lincRNA	1	1.75131
chr9	136779939	136780218	279	+	ENSG00000224662.2	processed_pseudogene	ATP6V1G1P3	OTTHUMG00000020944.2	pseudogene	1	3.58423
chr9	137063535	137064581	1046	+	ENSG00000231864.2	antisense	RP11-229P13.23	OTTHUMG00000020975.2	lncRNA	1	0.956023
chr9	137286112	137287236	1124	+	ENSG00000270259.2	processed_pseudogene	RP13-122B23.9	OTTHUMG00000184711.2	pseudogene	1	0.88968
chr9	137293868	137295721	1853	-	ENSG00000260996.1	sense_overlapping	RP13-122B23.8	OTTHUMG00000175633.1	lncRNA	2	1.07933
chr10	5776071	5776858	787	+	ENSG00000270427.1	processed_pseudogene	NRBF2P5	OTTHUMG00000184677.1	pseudogene	1	1.27065
chr10	8052242	8053449	1207	-	ENSG00000243350.1	lincRNA	RP11-379F12.3	OTTHUMG00000017641.1	lincRNA	1	0.8285
chr10	14877688	14878686	998	-	ENSG00000272853.1	lincRNA	RP11-398C13.6	OTTHUMG00000186172.1	lincRNA	1	1.002
chr10	21174014	21175048	1034	+	ENSG00000231920.1	antisense	NEBL-AS1	OTTHUMG00000017789.1	lncRNA	1	0.967118
chr10	37857740	37859110	1370	+	ENSG00000236514.1	antisense	RP11-162G10.5	OTTHUMG00000017979.1	lncRNA	1	0.729927
chr10	43136824	43138334	1510	-	ENSG00000273008.1	lincRNA	RP11-351D16.3	OTTHUMG00000186248.1	lincRNA	1	0.662252
chr10	43420738	43422100	1362	+	ENSG00000230555.2	lincRNA	RP11-517P14.2	OTTHUMG00000018028.2	lincRNA	1	0.734214
chr10	48745545	48746128	583	-	ENSG00000228754.1	processed_pseudogene	RP11-534L6.3	OTTHUMG00000018177.1	pseudogene	1	1.71527
chr10	63465229	63466563	1334	+	ENSG00000272767.1	antisense	JMJD1C-AS1	OTTHUMG00000186280.1	lncRNA	1	0.749625
chr10	72274915	72275980	1065	-	ENSG00000269926.1	antisense	RP11-442H21.2	OTTHUMG00000018435.2	lncRNA	1	0.938967
chr10	86521945	86525101	3156	+	ENSG00000227896.2	antisense	RP11-77P6.2	OTTHUMG00000018652.2	lncRNA	2	0.633714
chr10	88727485	88728914	1429	+	ENSG00000226358.1	processed_pseudogene	KRT8P38	OTTHUMG00000018697.1	pseudogene	1	0.69979
chr10	89644603	89645223	620	-	ENSG00000249962.1	processed_pseudogene	RP11-80H5.5	OTTHUMG00000018721.1	pseudogene	1	1.6129
chr10	91908131	91909348	1217	+	ENSG00000272817.1	antisense	RP11-402D21.2	OTTHUMG00000186460.1	lncRNA	1	0.821693
chr10	92216332	92216793	461	+	ENSG00000105988.6	processed_pseudogene	NHP2P1	OTTHUMG00000018755.1	pseudogene	1	2.1692
chr10	95183653	95184217	564	+	ENSG00000225533.1	processed_pseudogene	PAWRP1	OTTHUMG00000018807.1	pseudogene	1	1.77305
chr10	101060029	101061005	976	-	ENSG00000273162.1	lincRNA	RP11-108L7.15	OTTHUMG00000186479.1	lincRNA	1	1.02459
chr10	124489823	124490578	755	-	ENSG00000229455.2	processed_pseudogene	RPS10P18	OTTHUMG00000019212.3	pseudogene	1	1.3245
chr10	133246478	133247891	1413	-	ENSG00000166917.8	antisense	MIR202HG	OTTHUMG00000170605.1	lncRNA	1	0.707714
chr11	1309769	1310707	938	+	ENSG00000255153.1	antisense	TOLLIP-AS1	OTTHUMG00000166230.1	lncRNA	1	1.0661
chr11	3854318	3855509	1191	-	ENSG00000228661.1	antisense	AC090587.5	OTTHUMG00000012285.1	lncRNA	1	0.839631
chr11	3854612	3855399	787	+	ENSG00000229368.1	sense_overlapping	AC090587.4	OTTHUMG00000012284.1	lncRNA	1	1.27065
chr11	6603642	6604420	778	-	ENSG00000254400.1	antisense	RP11-732A19.8	OTTHUMG00000166620.1	lncRNA	1	1.28535
chr11	9094377	9095890	1513	+	ENSG00000213538.5	processed_pseudogene	KRT8P41	OTTHUMG00000165715.1	pseudogene	1	0.660939
chr11	12086891	12089441	2550	+	ENSG00000255400.1	lincRNA	RP13-631K18.5	OTTHUMG00000165727.1	lincRNA	2	0.784314
chr11	14907518	14907986	468	+	ENSG00000253179.1	unprocessed_pseudogene	CALCP	OTTHUMG00000164573.23	pseudogene	1	2.13675
chr11	45771432	45772358	926	+	ENSG00000205106.4	lincRNA	DKFZp779M0652	OTTHUMG00000166518.1	lincRNA	2	2.15983
chr11	46238382	46239267	885	+	ENSG00000254639.1	lincRNA	CTD-2589M5.5	OTTHUMG00000166909.1	lincRNA	1	1.12994
chr11	55714996	55715632	636	+	ENSG00000254457.1	unprocessed_pseudogene	OR5D2P	OTTHUMG00000166804.1	pseudogene	1	1.57233
chr11	55726118	55727158	1040	+	ENSG00000186886.6	unprocessed_pseudogene	OR5D3P	OTTHUMG00000166805.2	pseudogene	1	0.961538
chr11	57476493	57477534	1041	-	ENSG00000255301.1	antisense	RP11-624G17.3	OTTHUMG00000167029.1	lncRNA	1	0.960615
chr11	59142121	59142610	489	-	ENSG00000255381.1	processed_pseudogene	AP001258.5	OTTHUMG00000167436.1	pseudogene	1	2.04499
chr11	59263389	59263802	413	-	ENSG00000254799.1	processed_pseudogene	SLC25A47P1	OTTHUMG00000167415.1	pseudogene	1	2.42131
chr11	62336911	62338090	1179	-	ENSG00000255118.1	antisense	RP11-703H8.7	OTTHUMG00000167512.1	lncRNA	1	0.848176
chr11	62786023	62786785	762	-	ENSG00000269176.2	antisense	RP11-727F15.12	OTTHUMG00000183002.2	lncRNA	1	1.31234
chr11	64449074	64451657	2583	+	ENSG00000181908.5	lincRNA	AP003774.4	OTTHUMG00000046124.3	lincRNA	2	0.774293
chr11	65487241	65488136	895	-	ENSG00000279243.1	lincRNA	CMB9-22P13.2	OTTHUMG00000189231.1	lincRNA	1	1.11732
chr11	65726939	65728214	1275	+	ENSG00000214659.4	processed_pseudogene	KRT8P26	OTTHUMG00000166591.1	pseudogene	1	0.784314
chr11	66067277	66069619	2342	-	ENSG00000255038.1	antisense	RP11-1167A19.2	OTTHUMG00000166666.1	lncRNA	2	0.853971
chr11	66264777	66265666	889	-	ENSG00000254855.1	antisense	RP11-867G23.1	OTTHUMG00000166905.1	lncRNA	1	1.12486
chr11	67374416	67374932	516	+	ENSG00000275484.1	lincRNA	CTC-1337H24.4	OTTHUMG00000188153.1	lincRNA	1	1.93798
chr11	67605521	67606642	1121	+	ENSG00000255119.1	antisense	RP11-655M14.12	OTTHUMG00000167300.1	lncRNA	1	0.892061
chr11	69000765	69002048	1283	-	ENSG00000261625.1	sense_overlapping	RP11-554A11.4	OTTHUMG00000172938.1	lncRNA	1	0.779423
chr11	89498748	89499198	450	-	ENSG00000255295.1	processed_pseudogene	RP11-745I13.1	OTTHUMG00000167299.1	pseudogene	1	2.22222
chr11	104873264	104873417	153	+	ENSG00000254569.1	unprocessed_pseudogene	RP11-693N9.1	OTTHUMG00000165999.1	pseudogene	1	6.53595
chr11	118688039	118690600	2561	-	ENSG00000255239.1	unprocessed_pseudogene	AP002954.6	OTTHUMG00000166410.1	pseudogene	2	0.780945
chr11	118791254	118793137	1883	+	ENSG00000278376.1	lincRNA	RP11-158I9.8	OTTHUMG00000188156.1	lincRNA	2	1.06213
chr11	119065263	119065677	414	-	ENSG00000271751.1	lincRNA	RP11-110I1.14	OTTHUMG00000185714.1	lincRNA	1	2.41546
chr11	119602875	119604306	1431	-	ENSG00000230716.3	processed_pseudogene	KRT8P7	OTTHUMG00000166175.1	pseudogene	1	0.698812
chr11	121426645	121427416	771	-	ENSG00000271022.1	processed_pseudogene	RP11-142I2.1	OTTHUMG00000184782.1	pseudogene	1	1.29702
chr11	127002910	127006058	3148	+	ENSG00000218109.5	antisense	KIRREL3-AS3	OTTHUMG00000165805.2	lncRNA	2	0.635324
chr12	203642	205094	1452	+	ENSG00000256577.2	antisense	RP11-283I3.2	OTTHUMG00000168005.2	lncRNA	1	0.688705
chr12	6537794	6538370	576	-	ENSG00000269968.1	antisense	RP5-940J5.9	OTTHUMG00000183895.1	lncRNA	1	1.73611
chr12	6964949	6965382	433	+	ENSG00000271969.1	antisense	U47924.29	OTTHUMG00000185704.1	lncRNA	1	2.30947
chr12	9135084	9135591	507	+	ENSG00000256720.1	processed_pseudogene	BTG1P1	OTTHUMG00000168328.1	pseudogene	1	1.97239
chr12	11512723	11514136	1413	+	ENSG00000270863.1	processed_pseudogene	DDX55P1	OTTHUMG00000184770.1	pseudogene	1	0.707714
chr12	25385670	25386241	571	-	ENSG00000278743.1	lincRNA	RP11-707G18.1	OTTHUMG00000187136.1	lincRNA	1	1.75131
chr12	26125155	26126617	1462	-	ENSG00000256894.1	antisense	RP11-283G6.3	OTTHUMG00000169175.1	lncRNA	1	0.683995
chr12	27779821	27781067	1246	-	ENSG00000256747.1	antisense	RP11-860B13.1	OTTHUMG00000169218.1	lncRNA	1	0.802568
chr12	31251992	31252597	605	-	ENSG00000243517.1	processed_pseudogene	RP11-627K11.1	OTTHUMG00000157517.1	pseudogene	1	1.65289
chr12	31324316	31325829	1513	+	ENSG00000177340.5	antisense	FLJ13224	OTTHUMG00000187470.1	lncRNA	1	0.660939
chr12	32726383	32727387	1004	-	ENSG00000257511.1	processed_pseudogene	RP11-278C7.1	OTTHUMG00000169453.1	pseudogene	1	0.996016
chr12	47817451	47817966	515	-	ENSG00000274737.1	sense_intronic	RP5-1057I20.6	OTTHUMG00000187387.2	lncRNA	1	1.94175
chr12	48442030	48442947	917	-	ENSG00000226413.2	unprocessed_pseudogene	OR8T1P	OTTHUMG00000154311.2	pseudogene	1	1.09051
chr12	48995150	48996334	1184	+	ENSG00000258283.1	antisense	RP11-386G11.3	OTTHUMG00000170404.1	lncRNA	1	0.844595
chr12	51820459	51822415	1956	-	ENSG00000261308.1	processed_pseudogene	FIGNL2	OTTHUMG00000175693.1	pseudogene	2	1.02249
chr12	53159586	53161000	1414	+	ENSG00000257808.1	lincRNA	RP11-1136G11.8	OTTHUMG00000170026.1	lincRNA	1	0.707214
chr12	56118968	56119939	971	-	ENSG00000258345.1	antisense	RP11-603J24.6	OTTHUMG00000170141.1	lncRNA	1	1.02987
chr12	57726271	57728356	2085	+	ENSG00000255737.2	antisense	AGAP2-AS1	OTTHUMG00000170286.1	lncRNA	2	0.959233
chr12	62021570	62022174	604	-	ENSG00000213363.4	processed_pseudogene	RPS3P6	OTTHUMG00000157595.1	pseudogene	1	1.65563
chr12	67440998	67442559	1561	-	ENSG00000256172.1	lincRNA	RP11-473M14.3	OTTHUMG00000169068.1	lincRNA	1	0.640615
chr12	69284397	69285485	1088	+	ENSG00000257818.1	processed_pseudogene	C1GALT1P1	OTTHUMG00000169341.1	pseudogene	1	0.919118
chr12	74538145	74538633	488	-	ENSG00000257386.1	antisense	RP11-56G10.2	OTTHUMG00000169696.1	lncRNA	1	2.04918
chr12	75333798	75334486	688	-	ENSG00000273987.1	sense_intronic	RP11-585P4.6	OTTHUMG00000187280.1	lncRNA	1	1.45349
chr12	94140077	94141337	1260	+	ENSG00000257360.1	processed_pseudogene	RP11-74K11.1	OTTHUMG00000170234.1	pseudogene	1	0.793651
chr12	101773114	101773755	641	-	ENSG00000258230.2	transcribed_processed_pseudogene	RP11-511H9.3	OTTHUMG00000170445.2	pseudogene	2	3.12012
chr12	103503381	103504936	1555	+	ENSG00000257415.1	processed_pseudogene	RP11-626I20.1	OTTHUMG00000170053.1	pseudogene	1	0.643087
chr12	118375350	118376275	925	-	ENSG00000270482.1	lincRNA	RP11-131L12.2	OTTHUMG00000185168.1	lincRNA	1	1.08108
chr12	122501187	122501641	454	+	ENSG00000275265.1	lincRNA	RP11-15J22.8	OTTHUMG00000187270.1	lincRNA	1	2.20264
chr12	127145072	127146532	1460	-	ENSG00000256001.1	lincRNA	RP11-575F12.2	OTTHUMG00000168461.1	lincRNA	1	0.684932
chr12	130047132	130048376	1244	+	ENSG00000256298.1	lincRNA	RP11-474D1.1	OTTHUMG00000168374.1	lincRNA	1	0.803859
chr13	19563589	19564900	1311	-	ENSG00000238132.2	processed_pseudogene	CASC4P1	OTTHUMG00000016496.2	pseudogene	1	0.762777
chr13	19587118	19588350	1232	+	ENSG00000225316.1	lincRNA	LINC00350	OTTHUMG00000016497.1	lincRNA	2	1.62338
chr13	19818121	19818619	498	-	ENSG00000233469.1	processed_pseudogene	ST6GALNAC4P1	OTTHUMG00000016501.1	pseudogene	1	2.00803
chr13	19863858	19865048	1190	+	ENSG00000275964.1	lincRNA	RP11-61K9.3	OTTHUMG00000187050.1	lincRNA	1	0.840336
chr13	27953526	27955370	1844	+	ENSG00000260704.1	lincRNA	LINC00543	OTTHUMG00000170880.1	lincRNA	3	1.6269
chr13	48974967	48976867	1900	-	ENSG00000275202.1	antisense	RP11-156K23.3	OTTHUMG00000187380.1	lncRNA	2	1.05263
chr14	19796345	19797260	915	+	ENSG00000258564.1	unprocessed_pseudogene	OR4N1P	OTTHUMG00000154362.2	pseudogene	1	1.0929
chr14	20305730	20306811	1081	+	ENSG00000258459.1	antisense	CTD-2292M16.7	OTTHUMG00000170853.1	lncRNA	1	0.925069
chr14	22556311	22557062	751	-	ENSG00000259054.1	lincRNA	AE000662.93	OTTHUMG00000170967.2	lincRNA	1	1.33156
chr14	22556640	22559037	2397	+	ENSG00000259003.1	lincRNA	AE000662.92	OTTHUMG00000170968.2	lincRNA	3	1.25156
chr14	25431193	25432234	1041	-	ENSG00000257976.1	processed_pseudogene	RP11-388G3.1	OTTHUMG00000170317.1	pseudogene	1	0.960615
chr14	39103140	39103812	672	+	ENSG00000258651.1	lincRNA	RP11-545M17.1	OTTHUMG00000170749.1	lincRNA	1	1.4881
chr14	43540883	43541826	943	-	ENSG00000258828.2	processed_pseudogene	KRT8P2	OTTHUMG00000170707.2	pseudogene	1	1.06045
chr14	65411170	65412690	1520	-	ENSG00000276116.2	antisense	FUT8-AS1	OTTHUMG00000186893.2	lncRNA	1	0.657895
chr14	73057925	73059415	1490	-	ENSG00000258813.2	antisense	RP11-109N23.4	OTTHUMG00000171423.2	lncRNA	1	0.671141
chr14	73539221	73539781	560	-	ENSG00000258408.1	processed_pseudogene	NT5CP2	OTTHUMG00000171604.1	pseudogene	1	1.78571
chr14	73571159	73571667	508	-	ENSG00000258524.1	processed_pseudogene	NT5CP1	OTTHUMG00000171605.1	pseudogene	1	1.9685
chr14	77696591	77697377	786	+	ENSG00000258917.1	processed_pseudogene	ZMYND19P1	OTTHUMG00000171543.1	pseudogene	1	1.27226
chr14	85528599	85529386	787	+	ENSG00000258945.1	lincRNA	RP11-497E19.2	OTTHUMG00000171371.1	lincRNA	1	1.27065
chr14	88551597	88552493	896	+	ENSG00000258789.1	antisense	RP11-507K2.3	OTTHUMG00000170802.1	lncRNA	1	1.11607
chr14	93138066	93138465	399	+	ENSG00000258595.2	processed_pseudogene	RP11-371E8.2	OTTHUMG00000171264.2	pseudogene	1	2.50627
chr14	96500810	96502321	1511	-	ENSG00000260806.1	antisense	RP11-872J21.3	OTTHUMG00000171440.1	lncRNA	1	0.661813
chr14	101843394	101844122	728	-	ENSG00000259161.2	processed_pseudogene	CTD-2017C7.3	OTTHUMG00000171643.2	pseudogene	1	1.37363
chr14	103694516	103695050	534	-	ENSG00000269910.1	antisense	RP11-73M18.10	OTTHUMG00000183944.1	lncRNA	1	1.87266
chr14	103694560	103695170	610	+	ENSG00000269940.1	sense_intronic	RP11-73M18.7	OTTHUMG00000183945.1	lncRNA	1	1.63934
chr14	104137150	104137898	748	-	ENSG00000258748.1	antisense	CTD-2223O18.1	OTTHUMG00000171595.1	lncRNA	1	1.3369
chr14	104681146	104684932	3786	+	ENSG00000256050.2	lincRNA	RP11-982M15.6	OTTHUMG00000170816.1	lincRNA	3	0.792393
chr14	106286811	106287657	846	-	ENSG00000238275.2	processed_pseudogene	HOMER2P2	OTTHUMG00000152092.2	pseudogene	1	1.18203
chr14	106436415	106436555	140	-	ENSG00000228757.1	unprocessed_pseudogene	AB019438.66	OTTHUMG00000152076.2	pseudogene	1	7.14286
chr14	106460092	106461055	963	-	ENSG00000228966.2	processed_pseudogene	HOMER2P1	OTTHUMG00000152103.3	pseudogene	1	1.03842
chr15	34494420	34495900	1480	+	ENSG00000261559.1	processed_pseudogene	FSCN1P1	OTTHUMG00000173389.1	pseudogene	1	0.675676
chr15	42313687	42314386	699	+	ENSG00000260571.1	processed_pseudogene	BNIP3P5	OTTHUMG00000172874.1	pseudogene	1	1.43062
chr15	45198517	45199139	622	-	ENSG00000259932.1	sense_intronic	CTD-2651B20.7	OTTHUMG00000172833.1	lncRNA	2	3.21543
chr15	45215547	45215943	396	+	ENSG00000259338.1	processed_pseudogene	CTD-2651B20.2	OTTHUMG00000172001.1	pseudogene	1	2.52525
chr15	48810701	48811909	1208	+	ENSG00000259700.3	processed_transcript	RP11-485O10.3	OTTHUMG00000172160.1	processed_transcript	1	0.827815
chr15	56887107	56888219	1112	+	ENSG00000276524.1	lincRNA	RP11-323F24.3	OTTHUMG00000186905.1	lincRNA	1	0.899281
chr15	59688517	59689418	901	+	ENSG00000259238.1	antisense	RP11-361D15.2	OTTHUMG00000171925.1	lncRNA	1	1.10988
chr15	62082450	62083305	855	-	ENSG00000259466.1	processed_pseudogene	NPM1P47	OTTHUMG00000171958.1	pseudogene	1	1.16959
chr15	63046034	63049387	3353	-	ENSG00000259498.1	antisense	RP11-244F12.3	OTTHUMG00000172299.1	lncRNA	3	0.894721
chr15	74303005	74304343	1338	+	ENSG00000261384.1	sense_intronic	RP11-60L3.2	OTTHUMG00000172634.1	lncRNA	1	0.747384
chr15	74374678	74375511	833	+	ENSG00000274937.1	lincRNA	CTD-2311M21.4	OTTHUMG00000186953.1	lincRNA	1	1.20048
chr15	75368155	75369584	1429	+	ENSG00000260274.1	lincRNA	RP11-817O13.8	OTTHUMG00000173067.1	lincRNA	1	0.69979
chr15	75452964	75453947	983	-	ENSG00000276744.1	sense_intronic	CTD-2562G15.3	OTTHUMG00000186962.1	lncRNA	1	1.01729
chr15	75624793	75625690	897	+	ENSG00000260235.1	antisense	CTD-2026K11.3	OTTHUMG00000172791.1	lncRNA	1	1.11483
chr15	84633874	84634635	761	+	ENSG00000254779.4	transcribed_processed_pseudogene	EGLN1P1	OTTHUMG00000166918.3	pseudogene	1	1.31406
chr15	85579046	85580178	1132	-	ENSG00000259375.1	antisense	RP11-815J21.2	OTTHUMG00000172210.1	lncRNA	1	0.883392
chr15	86139838	86140240	402	-	ENSG00000261077.1	processed_pseudogene	RP11-553E24.1	OTTHUMG00000172871.1	pseudogene	1	2.48756
chr15	90932586	90935130	2544	-	ENSG00000224441.1	antisense	AC068831.3	OTTHUMG00000141259.1	lncRNA	2	0.786164
chr15	91022766	91023200	434	+	ENSG00000278514.1	lincRNA	AC068831.16	OTTHUMG00000187012.1	lincRNA	1	2.30415
chr15	94168349	94168751	402	+	ENSG00000258570.1	processed_pseudogene	RP11-452K20.1	OTTHUMG00000171812.1	pseudogene	1	2.48756
chr16	1579242	1580308	1066	-	ENSG00000260954.1	sense_intronic	LA16c-425C2.1	OTTHUMG00000176603.1	lncRNA	1	0.938086
chr16	19410729	19411662	933	-	ENSG00000260681.1	antisense	CTA-363E6.5	OTTHUMG00000177223.1	lncRNA	1	1.07181
chr16	21950218	21951708	1490	-	ENSG00000274460.1	processed_transcript	CTD-2649C14.2	OTTHUMG00000186800.1	processed_transcript	1	0.671141
chr16	25106569	25107102	533	-	ENSG00000275494.1	sense_intronic	RP11-266L9.8	OTTHUMG00000186826.1	lncRNA	1	1.87617
chr16	28553709	28554140	431	-	ENSG00000275441.1	antisense	RP11-666O2.2	OTTHUMG00000186839.1	lncRNA	1	2.32019
chr16	28862166	28863340	1174	-	ENSG00000261766.1	antisense	RP11-22P6.2	OTTHUMG00000176591.1	lncRNA	1	0.851789
chr16	29806496	29807732	1236	-	ENSG00000259952.1	antisense	AC009133.15	OTTHUMG00000177140.1	lncRNA	1	0.809061
chr16	29862760	29863417	657	+	ENSG00000278713.1	antisense	CTD-2574D22.7	OTTHUMG00000186861.1	lncRNA	1	1.52207
chr16	30615256	30615679	423	-	ENSG00000260678.1	transcribed_processed_pseudogene	RP11-146F11.4	OTTHUMG00000176952.1	pseudogene	1	2.36407
chr16	30956872	30957199	327	-	ENSG00000275263.1	lincRNA	RP11-1072A3.4	OTTHUMG00000186886.1	lincRNA	1	3.0581
chr16	31456711	31459736	3025	-	ENSG00000260267.1	antisense	RP11-452L6.5	OTTHUMG00000176617.1	lncRNA	2	0.661157
chr16	31699676	31700465	789	-	ENSG00000260568.1	lincRNA	CTD-2358C21.3	OTTHUMG00000176629.1	lincRNA	1	1.26743
chr16	48334471	48334854	383	-	ENSG00000240793.1	processed_pseudogene	UBA52P8	OTTHUMG00000158140.1	pseudogene	1	2.61097
chr16	50806668	50807629	961	+	ENSG00000261703.1	lincRNA	RP11-327F22.5	OTTHUMG00000173406.1	lincRNA	1	1.04058
chr16	56643705	56644786	1081	+	ENSG00000205361.8	transcribed_unprocessed_pseudogene	MT1DP	OTTHUMG00000158354.2	pseudogene	1	0.925069
chr16	67430667	67431464	797	-	ENSG00000261320.1	lincRNA	RP11-297D21.2	OTTHUMG00000175505.1	lincRNA	1	1.25471
chr17	2042900	2043425	525	-	ENSG00000262533.1	antisense	RP11-667K14.4	OTTHUMG00000177679.1	lncRNA	1	1.90476
chr17	4731756	4732371	615	-	ENSG00000261898.2	antisense	RP11-314A20.5	OTTHUMG00000177897.2	lncRNA	1	1.62602
chr17	5019214	5020093	879	-	ENSG00000227495.1	antisense	AC109333.10	OTTHUMG00000132924.2	lncRNA	1	1.13766
chr17	7436557	7437523	966	-	ENSG00000262624.1	antisense	RP11-104H15.9	OTTHUMG00000178213.1	lncRNA	1	1.0352
chr17	15261015	15265707	4692	+	ENSG00000265445.1	antisense	RP11-849N15.1	OTTHUMG00000178498.1	lncRNA	3	0.639386
chr17	16427474	16428719	1245	+	ENSG00000239203.1	processed_transcript	AC093484.4	OTTHUMG00000058991.1	processed_transcript	1	0.803213
chr17	20008051	20009234	1183	-	ENSG00000261033.1	antisense	RP11-209D14.2	OTTHUMG00000175977.2	lncRNA	1	0.845309
chr17	22693325	22694831	1506	-	ENSG00000264431.1	processed_pseudogene	RP11-285M22.2	OTTHUMG00000179097.2	pseudogene	1	0.664011
chr17	22704415	22705685	1270	+	ENSG00000264970.1	processed_pseudogene	RP11-846F4.11	OTTHUMG00000179098.1	pseudogene	1	0.787402
chr17	28226563	28228065	1502	+	ENSG00000237575.4	transcribed_unprocessed_pseudogene	PYY2	OTTHUMG00000132450.2	pseudogene	1	0.665779
chr17	28416922	28417492	570	+	ENSG00000265541.1	unprocessed_pseudogene	H3F3BP2	OTTHUMG00000179306.1	pseudogene	1	1.75439
chr17	28848860	28849592	732	+	ENSG00000264138.1	unprocessed_pseudogene	RP11-20B24.3	OTTHUMG00000179496.1	pseudogene	2	2.73224
chr17	29591703	29592241	538	-	ENSG00000264647.1	antisense	RP11-68I3.7	OTTHUMG00000179725.1	lncRNA	2	3.71747
chr17	29639627	29640825	1198	+	ENSG00000263370.1	antisense	RP11-68I3.5	OTTHUMG00000179727.1	lncRNA	1	0.834725
chr17	32111562	32112590	1028	-	ENSG00000265574.1	processed_pseudogene	WDR45BP1	OTTHUMG00000179563.1	pseudogene	2	1.94553
chr17	32876759	32878637	1878	+	ENSG00000226377.1	antisense	AC084809.2	OTTHUMG00000132777.1	lncRNA	2	1.06496
chr17	34080882	34082224	1342	-	ENSG00000263485.1	sense_intronic	CTC-304I17.4	OTTHUMG00000179673.1	lncRNA	1	0.745156
chr17	35596904	35597128	224	-	ENSG00000267592.1	processed_pseudogene	CTC-507E2.2	OTTHUMG00000179970.1	pseudogene	1	4.46429
chr17	39835037	39836080	1043	-	ENSG00000264663.1	processed_pseudogene	KRT8P34	OTTHUMG00000179518.1	pseudogene	1	0.958773
chr17	42679963	42682020	2057	+	ENSG00000267042.1	antisense	CTD-3193K9.4	OTTHUMG00000180642.1	lncRNA	2	0.97229
chr17	43917194	43917985	791	+	ENSG00000267496.4	lincRNA	FAM215A	OTTHUMG00000181798.1	lincRNA	1	1.26422
chr17	44328613	44331462	2849	+	ENSG00000267211.1	lincRNA	RP5-1067M6.3	OTTHUMG00000181815.1	lincRNA	2	0.702001
chr17	45585871	45586929	1058	+	ENSG00000264070.1	processed_pseudogene	DND1P1	OTTHUMG00000178253.1	pseudogene	1	0.94518
chr17	47946802	47948275	1473	-	ENSG00000264019.1	antisense	RP11-6N17.6	OTTHUMG00000178296.1	lncRNA	1	0.678887
chr17	50094065	50094647	582	+	ENSG00000276851.1	lincRNA	RP5-875H18.9	OTTHUMG00000186661.1	lincRNA	1	1.71821
chr17	50396438	50397888	1450	+	ENSG00000253102.1	antisense	RP1-117B12.4	OTTHUMG00000162080.3	lncRNA	1	0.689655
chr17	50563203	50563783	580	-	ENSG00000250976.1	antisense	RP11-94C24.11	OTTHUMG00000162216.1	lncRNA	1	1.72414
chr17	50847950	50849270	1320	+	ENSG00000243521.2	processed_pseudogene	RPL5P33	OTTHUMG00000157880.2	pseudogene	1	0.757576
chr17	54754165	54754649	484	-	ENSG00000263125.1	processed_pseudogene	ARL2BPP8	OTTHUMG00000177815.2	pseudogene	1	2.06612
chr17	56939932	56941275	1343	+	ENSG00000262298.1	antisense	RP5-1107A17.3	OTTHUMG00000178127.1	lncRNA	1	0.744602
chr17	60315834	60316215	381	+	ENSG00000271626.1	processed_pseudogene	RP11-3K24.2	OTTHUMG00000184886.1	pseudogene	1	2.62467
chr17	61411751	61413280	1529	+	ENSG00000187013.4	lincRNA	C17orf82	OTTHUMG00000180077.1	lincRNA	1	0.654022
chr17	67276118	67276351	233	-	ENSG00000264093.1	processed_pseudogene	RP11-401F2.2	OTTHUMG00000179557.1	pseudogene	1	4.29185
chr17	75271369	75273895	2526	+	ENSG00000263843.1	antisense	RP11-649A18.12	OTTHUMG00000179606.1	lncRNA	2	0.791766
chr17	75679474	75679967	493	-	ENSG00000264829.1	antisense	RP11-474I11.8	OTTHUMG00000179799.1	lncRNA	1	2.0284
chr17	75818815	75820055	1240	-	ENSG00000266980.1	antisense	RP11-552F3.4	OTTHUMG00000179894.1	lncRNA	1	0.806452
chr17	75876372	75879546	3174	+	ENSG00000267801.1	antisense	RP11-552F3.9	OTTHUMG00000179917.1	lncRNA	4	1.26024
chr17	81480523	81481570	1047	-	ENSG00000278200.1	lincRNA	RP13-766D20.4	OTTHUMG00000186760.1	lincRNA	1	0.95511
chr17	81701324	81703300	1976	-	ENSG00000262049.1	antisense	RP13-1032I1.7	OTTHUMG00000178170.1	lncRNA	3	1.51822
chr17	81922899	81924511	1612	+	ENSG00000264769.1	antisense	RP11-498C9.12	OTTHUMG00000178434.1	lncRNA	1	0.620347
chr17	82153430	82154815	1385	+	ENSG00000265678.1	antisense	RP11-1376P16.2	OTTHUMG00000178560.1	lncRNA	2	1.44404
chr18	832238	832469	231	+	ENSG00000266575.1	processed_pseudogene	BOLA2P1	OTTHUMG00000178360.1	pseudogene	1	4.329
chr18	3770017	3771430	1413	-	ENSG00000266513.1	sense_intronic	RP11-874J12.3	OTTHUMG00000178332.1	lncRNA	1	0.707714
chr18	12056676	12057822	1146	-	ENSG00000212712.2	processed_pseudogene	AP002414.1	OTTHUMG00000073721.2	pseudogene	1	0.8726
chr18	12091674	12093141	1467	-	ENSG00000267478.1	processed_pseudogene	RP11-815J4.5	OTTHUMG00000180684.1	pseudogene	1	0.681663
chr18	12246589	12247055	466	+	ENSG00000267663.1	processed_pseudogene	RP11-64C12.9	OTTHUMG00000180721.1	pseudogene	1	2.14592
chr18	13139780	13140489	709	-	ENSG00000267656.1	processed_pseudogene	RP11-807E13.3	OTTHUMG00000181947.1	pseudogene	1	1.41044
chr18	24402153	24402714	561	+	ENSG00000273321.1	lincRNA	RP11-621L6.3	OTTHUMG00000186241.1	lincRNA	1	1.78253
chr18	31942575	31944156	1581	+	ENSG00000263823.1	antisense	RP11-326K13.4	OTTHUMG00000179804.1	lncRNA	1	0.632511
chr18	58398663	58400082	1419	-	ENSG00000267396.1	antisense	RP11-845C23.3	OTTHUMG00000179965.1	lncRNA	1	0.704722
chr18	76256891	76258337	1446	+	ENSG00000264212.1	lincRNA	RP11-94B19.3	OTTHUMG00000179136.1	lincRNA	1	0.691563
chr19	999796	1002757	2961	-	ENSG00000266990.1	antisense	LLNLR-284B4.2	OTTHUMG00000189099.1	lncRNA	2	0.675447
chr19	1852382	1853622	1240	+	ENSG00000267125.2	antisense	CTB-31O20.6	OTTHUMG00000179993.2	lncRNA	1	0.806452
chr19	6716386	6717742	1356	-	ENSG00000276980.1	sense_intronic	CTD-3128G10.7	OTTHUMG00000186561.1	lncRNA	1	0.737463
chr19	10259109	10260045	936	-	ENSG00000267105.1	antisense	CTD-2369P2.4	OTTHUMG00000180402.1	lncRNA	1	1.06838
chr19	13796574	13796933	359	-	ENSG00000267582.1	antisense	CTD-3252C9.2	OTTHUMG00000181753.1	lncRNA	1	2.78552
chr19	14916428	14917380	952	+	ENSG00000198367.3	unprocessed_pseudogene	OR7A11P	OTTHUMG00000154276.2	pseudogene	1	1.05042
chr19	36378028	36378832	804	+	ENSG00000266973.1	antisense	CTD-3162L10.3	OTTHUMG00000180676.1	lncRNA	1	1.24378
chr19	36489649	36491040	1391	+	ENSG00000267309.1	antisense	CTD-2630F21.1	OTTHUMG00000180679.1	lncRNA	1	0.718907
chr19	38526954	38528555	1601	-	ENSG00000269445.1	antisense	AC067969.1	OTTHUMG00000182523.1	lncRNA	1	0.62461
chr19	38738284	38739863	1579	+	ENSG00000267892.1	antisense	CTD-2540F13.2	OTTHUMG00000182526.1	lncRNA	1	0.633312
chr19	42424384	42425071	687	-	ENSG00000268605.1	sense_intronic	CTB-50E14.4	OTTHUMG00000182816.1	lncRNA	1	1.4556
chr19	42560433	42561750	1317	-	ENSG00000230558.2	unprocessed_pseudogene	CEACAMP2	OTTHUMG00000151119.2	pseudogene	1	0.759301
chr19	45641494	45642840	1346	+	ENSG00000267757.4	processed_transcript	EML2-AS1	OTTHUMG00000182128.1	processed_transcript	2	1.48588
chr19	46787815	46789043	1228	+	ENSG00000275719.1	antisense	CTB-147N14.6	OTTHUMG00000186769.1	lncRNA	1	0.814332
chr19	47607873	47608454	581	-	ENSG00000277383.1	antisense	CTD-3001H11.2	OTTHUMG00000186770.1	lncRNA	1	1.72117
chr19	47794467	47794890	423	-	ENSG00000213035.4	processed_pseudogene	RPL23AP80	OTTHUMG00000158216.2	pseudogene	1	2.36407
chr19	47794650	47794920	270	+	ENSG00000271150.1	processed_pseudogene	CTD-2571L23.9	OTTHUMG00000185249.1	pseudogene	1	3.7037
chr19	49808933	49809738	805	+	ENSG00000269194.1	antisense	AC006942.4	OTTHUMG00000183160.1	lncRNA	1	1.24224
chr19	50486810	50487638	828	-	ENSG00000268518.1	lincRNA	CTD-2545M3.8	OTTHUMG00000183047.1	lincRNA	1	1.20773
chr19	53512092	53512616	524	-	ENSG00000274892.1	unprocessed_pseudogene	CTB-167G5.7	OTTHUMG00000188032.1	pseudogene	1	1.9084
chr19	53772506	53773280	774	-	ENSG00000229000.1	processed_pseudogene	SEPT7P8	OTTHUMG00000060777.1	pseudogene	1	1.29199
chr19	54031412	54031504	92	+	ENSG00000276206.1	unprocessed_pseudogene	CTD-3093M3.1	OTTHUMG00000188518.1	pseudogene	1	10.8696
chr19	54438665	54439544	879	-	ENSG00000267838.2	lincRNA	AC008746.12	OTTHUMG00000150514.2	lincRNA	1	1.13766
chr19	55338945	55339283	338	-	ENSG00000276831.1	lincRNA	CTD-2105E13.16	OTTHUMG00000186783.1	lincRNA	1	2.95858
chr19	55670632	55672069	1437	+	ENSG00000267096.1	sense_intronic	CTD-2537I9.13	OTTHUMG00000180910.1	lncRNA	1	0.695894
chr19	55777553	55778900	1347	+	ENSG00000255238.1	processed_pseudogene	RFPL4AP1	OTTHUMG00000165451.1	pseudogene	1	0.74239
chr20	1117847	1118450	603	-	ENSG00000276026.1	antisense	RP4-545L17.11	OTTHUMG00000186544.1	lncRNA	1	1.65837
chr20	2780614	2781041	427	+	ENSG00000226217.1	processed_pseudogene	RPL19P1	OTTHUMG00000031708.1	pseudogene	1	2.34192
chr20	3888239	3888868	629	-	ENSG00000229539.1	antisense	RP11-119B16.2	OTTHUMG00000031766.1	lncRNA	1	1.58983
chr20	19212852	19213477	625	-	ENSG00000235996.1	antisense	RP11-97N19.2	OTTHUMG00000031988.1	lncRNA	1	1.6
chr20	21302731	21303704	973	-	ENSG00000275457.1	antisense	RP1-198K11.5	OTTHUMG00000186716.1	lncRNA	1	1.02775
chr20	25284915	25285588	673	-	ENSG00000276952.1	antisense	RP5-965G21.6	OTTHUMG00000186746.1	lncRNA	1	1.48588
chr20	34475924	34476474	550	-	ENSG00000181741.7	processed_pseudogene	FDX1P1	OTTHUMG00000032297.1	pseudogene	1	1.81818
chr20	34476205	34476787	582	+	ENSG00000277558.1	sense_intronic	RP3-468O1.6	OTTHUMG00000186779.1	lncRNA	1	1.71821
chr20	37095785	37097178	1393	+	ENSG00000269846.1	antisense	RP4-621N11.2	OTTHUMG00000187317.1	lncRNA	1	0.717875
chr20	38962472	38962993	521	+	ENSG00000277581.1	sense_intronic	RP4-616B8.6	OTTHUMG00000186879.1	lncRNA	1	1.91939
chr20	44448777	44450092	1315	-	ENSG00000237907.1	antisense	LINC01430	OTTHUMG00000032534.2	lncRNA	1	0.760456
chr20	57710183	57712780	2597	+	ENSG00000278709.1	antisense	NKILA	OTTHUMG00000186958.1	lncRNA	2	0.770119
chr20	59515191	59516039	848	+	ENSG00000227282.1	lincRNA	RP11-164D18.2	OTTHUMG00000137386.1	lincRNA	1	1.17925
chr20	62477870	62478594	724	+	ENSG00000272050.1	lincRNA	RP13-379O24.3	OTTHUMG00000185378.1	lincRNA	1	1.38122
chr21	39313935	39314962	1027	+	ENSG00000255568.3	antisense	BRWD1-AS2	OTTHUMG00000066154.5	lncRNA	1	0.97371
chr21	46420553	46421034	481	-	ENSG00000225043.1	processed_pseudogene	RPL18AP2	OTTHUMG00000154992.1	pseudogene	1	2.079
chr22	17213516	17214155	639	+	ENSG00000203416.3	processed_pseudogene	FAM32B	OTTHUMG00000150068.2	pseudogene	1	1.56495
chr22	20110821	20111875	1054	-	ENSG00000243762.1	antisense	AC006547.8	OTTHUMG00000150489.2	lncRNA	1	0.948767
chr22	22692778	22693312	534	-	ENSG00000223999.1	lincRNA	LL22NC03-102D1.18	OTTHUMG00000151209.1	lincRNA	1	1.87266
chr22	25048967	25051966	2999	-	ENSG00000279006.1	antisense	CTA-243E7.2	OTTHUMG00000189170.1	lncRNA	2	0.666889
chr22	29608900	29609501	601	+	ENSG00000233010.1	processed_pseudogene	RPEP4	OTTHUMG00000155625.1	pseudogene	1	1.66389
chr22	31082156	31083565	1409	-	ENSG00000273387.1	antisense	RP3-412A9.16	OTTHUMG00000186126.1	lncRNA	1	0.709723
chr22	42278188	42278846	658	+	ENSG00000273366.1	lincRNA	CTA-989H11.1	OTTHUMG00000186179.1	lincRNA	1	1.51976
chr22	46053093	46053560	467	+	ENSG00000273289.1	antisense	RP6-109B7.5	OTTHUMG00000186115.1	lncRNA	1	2.14133
chr22	46295143	46296660	1517	-	ENSG00000277232.2	lincRNA	GTSE1-AS1	OTTHUMG00000189497.1	lincRNA	1	0.659196
chrX	28659065	28659469	404	-	ENSG00000226436.1	processed_pseudogene	RP1-22N22.1	OTTHUMG00000021314.1	pseudogene	1	2.47525
chrX	41275739	41276778	1039	+	ENSG00000223714.1	lincRNA	RP5-1172N10.2	OTTHUMG00000021366.1	lincRNA	1	0.962464
chrX	47204921	47205865	944	+	ENSG00000224975.1	sense_intronic	INE1	OTTHUMG00000046428.1	lncRNA	1	1.05932
chrX	49876724	49879241	2517	-	ENSG00000234390.4	lincRNA	USP27X-AS1	OTTHUMG00000024154.2	lincRNA	2	0.794597
chrX	85851575	85851682	107	-	ENSG00000276892.1	processed_pseudogene	RP1-93L7.4	OTTHUMG00000188095.1	pseudogene	1	9.34579
chrX	107272582	107273656	1074	+	ENSG00000204053.6	processed_pseudogene	MYCLP1	OTTHUMG00000022162.3	pseudogene	2	1.8622
chrX	107428630	107429461	831	+	ENSG00000214720.4	processed_pseudogene	KRT18P49	OTTHUMG00000022163.2	pseudogene	1	1.20337
chrX	123514473	123514872	399	+	ENSG00000179101.5	processed_pseudogene	RP11-349N19.2	OTTHUMG00000022327.1	pseudogene	1	2.50627
chrX	130330857	130331069	212	+	ENSG00000225046.2	processed_pseudogene	RP1-20I3.3	OTTHUMG00000022396.2	pseudogene	1	4.71698
chrX	153028785	153030148	1363	+	ENSG00000234200.2	unprocessed_pseudogene	U82671.8	OTTHUMG00000024188.4	pseudogene	1	0.733676
chrX	153662162	153662692	530	+	ENSG00000237793.3	processed_pseudogene	RPL18AP16	OTTHUMG00000024214.3	pseudogene	1	1.88679
chrX	154396878	154398816	1938	-	ENSG00000280195.1	antisense	XX-FW83563B9.5	OTTHUMG00000057501.1	lncRNA	2	1.03199

## Sheet: HeLa-S3
chromosome	start	end	width	strand	gene id	gene type	gene name	havana gene	biotype	CTCF count	CTCF density
chr1	2049203	2050070	867	-	ENSG00000226969.1	antisense	RP11-547D24.3	OTTHUMG00000041087.1	lncRNA	1	1.1534
chr1	6204840	6205780	940	-	ENSG00000226944.1	antisense	RP1-120G22.11	OTTHUMG00000041452.1	lncRNA	1	1.06383
chr1	8878835	8879894	1059	+	ENSG00000230679.1	antisense	ENO1-AS1	OTTHUMG00000001779.1	lncRNA	1	0.944287
chr1	10429881	10430677	796	-	ENSG00000271989.1	antisense	RP4-736L20.3	OTTHUMG00000185648.1	lncRNA	2	2.51256
chr1	20243095	20244655	1560	+	ENSG00000228105.1	lincRNA	RP3-340N1.6	OTTHUMG00000002707.2	lincRNA	1	0.641026
chr1	20732880	20733952	1072	+	ENSG00000233069.1	antisense	RP5-930J4.2	OTTHUMG00000002621.1	lncRNA	1	0.932836
chr1	23949016	23949383	367	-	ENSG00000230228.2	processed_pseudogene	RP11-4M23.4	OTTHUMG00000013896.2	pseudogene	1	2.7248
chr1	26169947	26171821	1874	-	ENSG00000236782.5	antisense	RP11-96L14.7	OTTHUMG00000007539.1	lncRNA	1	0.533618
chr1	27686810	27687471	661	-	ENSG00000226662.2	processed_pseudogene	CHMP1AP1	OTTHUMG00000003514.3	pseudogene	1	1.51286
chr1	31789130	31791322	2192	+	ENSG00000254545.1	antisense	RP11-84A19.3	OTTHUMG00000165113.1	lncRNA	2	0.912409
chr1	39718028	39718595	567	+	ENSG00000225333.6	processed_pseudogene	RP1-144F13.4	OTTHUMG00000000457.4	pseudogene	1	1.76367
chr1	45303910	45305619	1709	+	ENSG00000281912.1	lincRNA	LINC01144	OTTHUMG00000189536.1	lincRNA	1	0.585138
chr1	46665910	46666375	465	-	ENSG00000233647.2	processed_pseudogene	NENFP1	OTTHUMG00000007990.2	pseudogene	1	2.15054
chr1	47179250	47180339	1089	+	ENSG00000224805.2	antisense	LINC00853	OTTHUMG00000007850.2	lncRNA	1	0.918274
chr1	48227888	48229561	1673	-	ENSG00000272491.1	antisense	RP5-1024N4.4	OTTHUMG00000185781.1	lncRNA	1	0.597729
chr1	52368677	52369244	567	+	ENSG00000224680.4	processed_pseudogene	PLA2G12AP1	OTTHUMG00000008103.2	pseudogene	1	1.76367
chr1	53180921	53186900	5979	+	ENSG00000277397.1	unprocessed_pseudogene	RP5-1024G6.9	OTTHUMG00000187525.1	pseudogene	3	0.501756
chr1	53291791	53292138	347	-	ENSG00000225030.1	sense_intronic	RP4-784A16.3	OTTHUMG00000008933.1	lncRNA	1	2.88184
chr1	62038842	62039111	269	+	ENSG00000236646.1	processed_pseudogene	LAMTOR5P1	OTTHUMG00000008916.2	pseudogene	1	3.71747
chr1	68161761	68163090	1329	-	ENSG00000234383.1	processed_pseudogene	CTBP2P8	OTTHUMG00000009154.1	pseudogene	1	0.752445
chr1	68282388	68282622	234	+	ENSG00000225242.2	processed_pseudogene	COX6B1P7	OTTHUMG00000009209.2	pseudogene	1	4.2735
chr1	74468195	74469543	1348	+	ENSG00000233894.1	antisense	RP4-650F12.2	OTTHUMG00000009610.1	lncRNA	1	0.74184
chr1	86703502	86704462	960	-	ENSG00000261737.1	antisense	RP4-612B15.3	OTTHUMG00000175864.1	lncRNA	1	1.04167
chr1	92749175	92749330	155	-	ENSG00000234202.2	processed_pseudogene	RP11-330C7.4	OTTHUMG00000010893.2	pseudogene	1	6.45161
chr1	108199926	108201491	1565	+	ENSG00000260879.1	antisense	RP11-483I13.5	OTTHUMG00000175898.1	lncRNA	1	0.638978
chr1	109100193	109100619	426	+	ENSG00000270066.3	lincRNA	SCARNA2	OTTHUMG00000184013.1	lincRNA	1	2.34742
chr1	110963302	110964649	1347	+	ENSG00000273010.1	antisense	RP11-96K19.5	OTTHUMG00000186361.1	lncRNA	2	1.48478
chr1	119886304	119886927	623	+	ENSG00000226446.1	processed_pseudogene	NOTCH2P1	OTTHUMG00000057603.1	pseudogene	1	1.60514
chr1	147840962	147842359	1397	+	ENSG00000223728.3	processed_pseudogene	RP11-314N2.2	OTTHUMG00000037548.2	pseudogene	1	0.71582
chr1	150255095	150257286	2191	-	ENSG00000276110.1	antisense	RP4-790G17.7	OTTHUMG00000185690.2	lncRNA	2	0.912825
chr1	151280024	151281929	1905	-	ENSG00000232671.5	antisense	RP11-126K1.2	OTTHUMG00000012346.6	lncRNA	1	0.524934
chr1	151340648	151341966	1318	+	ENSG00000224645.1	antisense	RP11-126K1.8	OTTHUMG00000073673.1	lncRNA	1	0.758725
chr1	154402328	154406564	4236	-	ENSG00000228013.1	antisense	RP11-350G8.5	OTTHUMG00000036070.1	lncRNA	3	0.708215
chr1	154480012	154481501	1489	+	ENSG00000273110.1	antisense	RP11-350G8.9	OTTHUMG00000186422.1	lncRNA	3	2.01478
chr1	154937370	154938059	689	+	ENSG00000270361.1	lincRNA	RP11-307C12.13	OTTHUMG00000185167.1	lincRNA	1	1.45138
chr1	154961825	154962623	798	+	ENSG00000271380.1	antisense	RP11-307C12.12	OTTHUMG00000185142.1	lncRNA	1	1.25313
chr1	155045191	155046118	927	-	ENSG00000232093.1	antisense	RP11-307C12.11	OTTHUMG00000041316.1	lncRNA	1	1.07875
chr1	157073257	157074703	1446	+	ENSG00000224520.2	processed_pseudogene	KRT8P45	OTTHUMG00000041329.2	pseudogene	1	0.691563
chr1	160776975	160780140	3165	-	ENSG00000274562.1	unprocessed_pseudogene	RP11-404F10.5	OTTHUMG00000187540.1	pseudogene	2	0.631912
chr1	179137764	179137934	170	+	ENSG00000234041.1	processed_pseudogene	RP11-345I18.1	OTTHUMG00000041095.1	pseudogene	1	5.88235
chr1	179447578	179448440	862	-	ENSG00000224620.2	processed_pseudogene	MEF2AP1	OTTHUMG00000035267.2	pseudogene	1	1.16009
chr1	181190471	181191149	678	-	ENSG00000225359.1	lincRNA	RP11-540K16.2	OTTHUMG00000035181.1	lincRNA	1	1.47493
chr1	201222113	201223123	1010	-	ENSG00000229821.1	antisense	RP11-567E21.3	OTTHUMG00000040658.1	lncRNA	1	0.990099
chr1	203835585	203835912	327	-	ENSG00000223505.2	processed_pseudogene	RP11-397P13.7	OTTHUMG00000057667.2	pseudogene	1	3.0581
chr1	206634649	206635622	973	-	ENSG00000237605.1	antisense	RP11-343H5.6	OTTHUMG00000036345.1	lncRNA	1	1.02775
chr1	206905928	206906393	465	+	ENSG00000271680.1	processed_pseudogene	RP11-564A8.8	OTTHUMG00000184466.1	pseudogene	1	2.15054
chr1	206907619	206908229	610	+	ENSG00000226945.1	processed_pseudogene	RP11-564A8.4	OTTHUMG00000036458.1	pseudogene	1	1.63934
chr1	226331999	226333655	1656	-	ENSG00000275406.1	unprocessed_pseudogene	RP11-125A15.3	OTTHUMG00000187548.1	pseudogene	1	0.603865
chr1	227234269	227235355	1086	+	ENSG00000228729.1	processed_pseudogene	RP11-211A18.2	OTTHUMG00000037614.1	pseudogene	1	0.92081
chr1	229270927	229271599	672	-	ENSG00000240524.2	transcribed_processed_pseudogene	RP5-1061H20.3	OTTHUMG00000037659.2	pseudogene	1	1.4881
chr1	235104180	235104609	429	-	ENSG00000273416.1	lincRNA	RP4-597N16.4	OTTHUMG00000185835.1	lincRNA	1	2.331
chr1	239898016	239899872	1856	-	ENSG00000234601.1	antisense	CHRM3-AS1	OTTHUMG00000039650.1	lncRNA	1	0.538793
chr1	247936061	247937513	1452	-	ENSG00000226191.3	processed_pseudogene	CLK3P2	OTTHUMG00000040208.2	pseudogene	1	0.688705
chr2	7671604	7672246	642	-	ENSG00000230515.1	lincRNA	AC092580.3	OTTHUMG00000151592.1	lincRNA	2	3.11526
chr2	9555899	9556775	876	+	ENSG00000271855.1	lincRNA	RP11-214N9.1	OTTHUMG00000185545.1	lincRNA	1	1.14155
chr2	11681460	11683328	1868	+	ENSG00000228496.1	sense_intronic	AC106875.1	OTTHUMG00000151822.1	lncRNA	2	1.07066
chr2	20590775	20592548	1773	-	ENSG00000231948.2	sense_intronic	HS1BP3-IT1	OTTHUMG00000151789.2	lncRNA	1	0.564016
chr2	25856461	25856966	505	-	ENSG00000218682.1	processed_pseudogene	AC010150.1	OTTHUMG00000152174.1	pseudogene	1	1.9802
chr2	28396815	28397110	295	+	ENSG00000270640.1	sense_intronic	RP11-373D23.2	OTTHUMG00000185291.1	lncRNA	1	3.38983
chr2	38535258	38536249	991	-	ENSG00000271443.1	transcribed_processed_pseudogene	RP11-541E12.1	OTTHUMG00000184445.1	pseudogene	1	1.00908
chr2	43227210	43228855	1645	+	ENSG00000279873.2	lincRNA	LINC01126	OTTHUMG00000152397.3	lincRNA	1	0.607903
chr2	43229573	43233394	3821	+	ENSG00000234936.1	antisense	AC010883.5	OTTHUMG00000152402.2	lncRNA	3	0.785135
chr2	45168583	45169414	831	+	ENSG00000231054.1	lincRNA	AC009236.2	OTTHUMG00000152442.1	lincRNA	1	1.20337
chr2	46166789	46167978	1189	-	ENSG00000231336.1	antisense	AC017006.3	OTTHUMG00000151721.1	lncRNA	1	0.841043
chr2	55617909	55618373	464	+	ENSG00000272606.1	antisense	RP11-554J4.1	OTTHUMG00000185926.1	lncRNA	1	2.15517
chr2	64330486	64332131	1645	-	ENSG00000238012.1	lincRNA	AC114752.1	OTTHUMG00000152671.1	lincRNA	2	1.21581
chr2	64522187	64524093	1906	-	ENSG00000260101.1	lincRNA	RP11-568N6.1	OTTHUMG00000175896.1	lincRNA	1	0.524659
chr2	70301451	70302072	621	+	ENSG00000233849.1	antisense	AC022201.5	OTTHUMG00000154180.1	lncRNA	1	1.61031
chr2	85186409	85187253	844	+	ENSG00000231134.1	sense_intronic	TCF7L1-IT1	OTTHUMG00000153211.1	lncRNA	1	1.18483
chr2	85889280	85890980	1700	+	ENSG00000232504.4	lincRNA	ST3GAL5-AS1	OTTHUMG00000153169.4	lincRNA	1	0.588235
chr2	95413456	95414296	840	-	ENSG00000248821.1	unprocessed_pseudogene	AC009238.6	OTTHUMG00000155175.1	pseudogene	1	1.19048
chr2	100607028	100609358	2330	+	ENSG00000234988.1	lincRNA	AC068538.4	OTTHUMG00000153149.1	lincRNA	2	0.858369
chr2	104412227	104414008	1781	-	ENSG00000225765.1	lincRNA	AC068535.3	OTTHUMG00000153049.1	lincRNA	1	0.561482
chr2	106543014	106544297	1283	+	ENSG00000232001.1	lincRNA	AC108868.6	OTTHUMG00000153180.1	lincRNA	1	0.779423
chr2	109127327	109128930	1603	-	ENSG00000259863.1	lincRNA	SH3RF3-AS1	OTTHUMG00000153437.1	lincRNA	1	0.62383
chr2	111887914	111888741	827	+	ENSG00000236307.2	processed_pseudogene	EEF1E1P1	OTTHUMG00000153261.2	pseudogene	1	1.20919
chr2	112346011	112346258	247	+	ENSG00000236555.1	processed_pseudogene	AC115115.4	OTTHUMG00000153285.1	pseudogene	1	4.04858
chr2	169767185	169768799	1614	-	ENSG00000231550.1	processed_pseudogene	PTCHD3P2	OTTHUMG00000154119.1	pseudogene	1	0.619579
chr2	169790093	169790885	792	+	ENSG00000214369.2	processed_pseudogene	AC009967.3	OTTHUMG00000153985.1	pseudogene	1	1.26263
chr2	172464262	172466022	1760	-	ENSG00000232788.1	antisense	AC078883.3	OTTHUMG00000154089.1	lncRNA	1	0.568182
chr2	177264359	177265515	1156	+	ENSG00000222043.2	antisense	AC079305.10	OTTHUMG00000154178.1	lncRNA	1	0.865052
chr2	183071040	183072486	1446	-	ENSG00000231203.1	processed_pseudogene	KRT8P10	OTTHUMG00000154237.2	pseudogene	1	0.691563
chr2	202178660	202179391	731	-	ENSG00000231903.1	antisense	AC079354.5	OTTHUMG00000154582.1	lncRNA	1	1.36799
chr2	206084605	206086564	1959	+	ENSG00000227946.1	lincRNA	AC007383.3	OTTHUMG00000154653.1	lincRNA	1	0.510465
chr2	208255247	208256181	934	+	ENSG00000231908.1	antisense	IDH1-AS1	OTTHUMG00000154707.1	lncRNA	2	2.14133
chr2	208269343	208269957	614	-	ENSG00000228380.1	processed_pseudogene	MYL6BP1	OTTHUMG00000154704.1	pseudogene	1	1.62866
chr2	208466238	208466626	388	-	ENSG00000227430.1	processed_pseudogene	AC019185.2	OTTHUMG00000154661.1	pseudogene	1	2.57732
chr2	222317242	222318653	1411	-	ENSG00000267034.1	lincRNA	RP11-384O8.1	OTTHUMG00000180633.1	lincRNA	1	0.708717
chr2	231452195	231453153	958	+	ENSG00000233538.1	lincRNA	AC017104.2	OTTHUMG00000153867.1	lincRNA	1	1.04384
chr2	241734715	241735498	783	-	ENSG00000215692.2	antisense	AC114730.8	OTTHUMG00000151478.1	lncRNA	1	1.27714
chr3	13926813	13927778	965	+	ENSG00000233121.1	unitary_pseudogene	VN1R20P	OTTHUMG00000154485.1	pseudogene	1	1.03627
chr3	25441164	25441502	338	-	ENSG00000229421.1	processed_pseudogene	AC133141.1	OTTHUMG00000155597.2	pseudogene	1	2.95858
chr3	26712307	26713364	1057	+	ENSG00000234165.1	lincRNA	AC114877.3	OTTHUMG00000155686.1	lincRNA	1	0.946074
chr3	33144104	33147721	3617	-	ENSG00000272149.1	antisense	RP11-627J17.1	OTTHUMG00000185462.1	lncRNA	2	0.552944
chr3	40970541	40971578	1037	-	ENSG00000233096.1	lincRNA	RP11-520A21.1	OTTHUMG00000156006.1	lincRNA	1	0.96432
chr3	43087479	43088068	589	+	ENSG00000227245.1	lincRNA	RP11-136C24.2	OTTHUMG00000156464.1	lincRNA	1	1.69779
chr3	52239258	52241097	1839	+	ENSG00000243224.1	antisense	RP5-1157M23.2	OTTHUMG00000158107.1	lncRNA	1	0.543774
chr3	109409678	109410084	406	-	ENSG00000230618.3	processed_pseudogene	H3F3AP3	OTTHUMG00000159215.1	pseudogene	1	2.46305
chr3	125679573	125679781	208	+	ENSG00000243072.1	processed_pseudogene	GS1-388B5.2	OTTHUMG00000159570.1	pseudogene	1	4.80769
chr3	146589602	146590325	723	+	ENSG00000241457.1	antisense	PLSCR5-AS1	OTTHUMG00000159436.1	lncRNA	1	1.38313
chr3	150238519	150240209	1690	+	ENSG00000244541.5	lincRNA	LINC01213	OTTHUMG00000159737.1	lincRNA	1	0.591716
chr3	156044155	156044948	793	-	ENSG00000242017.1	processed_pseudogene	ALG1L15P	OTTHUMG00000158546.1	pseudogene	2	2.52207
chr3	156671862	156674378	2516	-	ENSG00000243926.1	antisense	TIPARP-AS1	OTTHUMG00000158643.1	lncRNA	2	0.794913
chr3	157162663	157163932	1269	-	ENSG00000244515.1	processed_pseudogene	KRT18P34	OTTHUMG00000158716.1	pseudogene	1	0.788022
chr3	170062244	170062951	707	+	ENSG00000242583.1	processed_pseudogene	RP11-379K17.9	OTTHUMG00000158778.1	pseudogene	1	1.41443
chr3	170495627	170496636	1009	+	ENSG00000241416.1	processed_pseudogene	KRT8P13	OTTHUMG00000158860.1	pseudogene	1	0.99108
chr3	179649494	179650200	706	-	ENSG00000243977.1	processed_pseudogene	RP11-473P24.2	OTTHUMG00000157785.1	pseudogene	1	1.41643
chr3	183884924	183888449	3525	+	ENSG00000234371.6	transcribed_processed_pseudogene	RPSAP31	OTTHUMG00000156888.1	pseudogene	3	0.851064
chr3	184134019	184135238	1219	-	ENSG00000272721.5	antisense	RP11-778D9.12	OTTHUMG00000186109.1	lncRNA	2	1.64069
chr3	187448845	187449450	605	+	ENSG00000228952.1	lincRNA	RP11-567G11.1	OTTHUMG00000156460.1	lincRNA	1	1.65289
chr3	196527339	196528791	1452	-	ENSG00000213358.3	unprocessed_pseudogene	AC092933.4	OTTHUMG00000155583.1	pseudogene	1	0.688705
chr4	26859806	26860599	793	-	ENSG00000240005.5	antisense	RP11-293A21.1	OTTHUMG00000159680.2	lncRNA	1	1.26103
chr4	39133913	39135608	1695	+	ENSG00000249685.1	lincRNA	RP11-360F5.3	OTTHUMG00000160465.1	lincRNA	1	0.589971
chr4	76756960	76758474	1514	-	ENSG00000233860.1	antisense	RP11-359D14.2	OTTHUMG00000157074.3	lncRNA	1	0.660502
chr4	126106139	126106923	784	-	ENSG00000251005.1	processed_pseudogene	RP11-318I4.2	OTTHUMG00000161148.1	pseudogene	1	1.27551
chr4	128069014	128069612	598	-	ENSG00000241651.4	processed_pseudogene	RP11-214O14.1	OTTHUMG00000157552.2	pseudogene	1	1.67224
chr4	135371177	135371924	747	-	ENSG00000250834.1	processed_pseudogene	KRT18P54	OTTHUMG00000161222.1	pseudogene	1	1.33869
chr4	146241806	146243669	1863	+	ENSG00000251010.1	antisense	RP11-6L6.7	OTTHUMG00000162030.1	lncRNA	1	0.536769
chr4	157204462	157204855	393	-	ENSG00000249819.1	processed_pseudogene	RP11-392C20.1	OTTHUMG00000161953.1	pseudogene	1	2.54453
chr4	165016887	165017433	546	+	ENSG00000276623.1	processed_pseudogene	RP11-366M4.19	OTTHUMG00000187585.1	pseudogene	1	1.8315
chr4	169791221	169791702	481	-	ENSG00000229204.3	processed_pseudogene	PTGES3P3	OTTHUMG00000160905.1	pseudogene	1	2.079
chr5	195778	196341	563	+	ENSG00000261434.1	sense_overlapping	CTD-2083E4.7	OTTHUMG00000175446.1	lncRNA	1	1.7762
chr5	10441290	10441792	502	-	ENSG00000250600.1	antisense	ROPN1L-AS1	OTTHUMG00000162052.1	lncRNA	1	1.99203
chr5	10627260	10628225	965	-	ENSG00000250106.1	antisense	ANKRD33B-AS1	OTTHUMG00000162124.1	lncRNA	1	1.03627
chr5	14639426	14641018	1592	-	ENSG00000250526.1	processed_pseudogene	CCT6P2	OTTHUMG00000161827.3	pseudogene	1	0.628141
chr5	17620533	17620939	406	-	ENSG00000250351.1	processed_pseudogene	RP11-432M8.10	OTTHUMG00000161841.1	pseudogene	1	2.46305
chr5	29001760	29003357	1597	+	ENSG00000249226.1	processed_pseudogene	SUCLG2P4	OTTHUMG00000160376.1	pseudogene	1	0.626174
chr5	32174471	32175272	801	+	ENSG00000272086.1	lincRNA	CTD-2186M15.3	OTTHUMG00000185453.1	lincRNA	1	1.24844
chr5	32522758	32523865	1107	+	ENSG00000249142.1	processed_pseudogene	CTD-2290P7.1	OTTHUMG00000161977.1	pseudogene	1	0.903342
chr5	33997044	33997724	680	-	ENSG00000250767.1	processed_pseudogene	RP11-1084J3.3	OTTHUMG00000162528.1	pseudogene	1	1.47059
chr5	35938822	35939993	1171	+	ENSG00000249748.1	antisense	RP11-79C6.3	OTTHUMG00000162092.1	lncRNA	1	0.853971
chr5	43006733	43007543	810	-	ENSG00000271788.1	lincRNA	CTD-2201E18.5	OTTHUMG00000185475.1	lincRNA	1	1.23457
chr5	43041575	43045390	3815	+	ENSG00000215068.7	antisense	AC025171.1	OTTHUMG00000131146.2	lncRNA	2	0.524246
chr5	61347126	61347716	590	+	ENSG00000251682.1	processed_pseudogene	RP11-631M6.3	OTTHUMG00000162250.1	pseudogene	1	1.69492
chr5	71475761	71476316	555	-	ENSG00000253536.1	processed_pseudogene	RP11-1174L13.2	OTTHUMG00000163655.1	pseudogene	1	1.8018
chr5	78222184	78222517	333	+	ENSG00000249372.1	processed_pseudogene	ATP6V1G1P6	OTTHUMG00000162480.1	pseudogene	1	3.003
chr5	88602780	88603117	337	+	ENSG00000250705.1	processed_pseudogene	CTC-470C15.1	OTTHUMG00000162633.1	pseudogene	2	5.93472
chr5	91280097	91281142	1045	-	ENSG00000234292.3	lincRNA	RP11-213H15.1	OTTHUMG00000162618.1	lincRNA	1	0.956938
chr5	93741640	93743500	1860	+	ENSG00000272406.1	lincRNA	RP11-185E12.2	OTTHUMG00000182153.2	lincRNA	1	0.537634
chr5	95834424	95835046	622	-	ENSG00000251000.1	processed_pseudogene	AC008592.3	OTTHUMG00000162736.1	pseudogene	1	1.60772
chr5	112173570	112175548	1978	+	ENSG00000250882.1	antisense	CTC-459M5.1	OTTHUMG00000162896.1	lncRNA	1	0.505561
chr5	112419583	112420978	1395	+	ENSG00000278921.2	lincRNA	EPB41L4A-AS2	OTTHUMG00000169519.1	lincRNA	1	0.716846
chr5	115389643	115392370	2727	-	ENSG00000249026.2	processed_pseudogene	CTNNAP1	OTTHUMG00000162908.2	pseudogene	2	0.733407
chr5	115770586	115770989	403	+	ENSG00000251118.1	processed_pseudogene	CTC-505O3.1	OTTHUMG00000162915.2	pseudogene	1	2.48139
chr5	130140031	130141950	1919	+	ENSG00000248610.1	processed_pseudogene	HSPA8P4	OTTHUMG00000163044.1	pseudogene	1	0.521105
chr5	132179234	132181128	1894	-	ENSG00000224015.1	lincRNA	AC063976.3	OTTHUMG00000059642.1	lincRNA	1	0.527983
chr5	139772528	139775406	2878	-	ENSG00000251387.1	lincRNA	CTB-35F21.3	OTTHUMG00000163334.1	lincRNA	2	0.694927
chr5	139775305	139775472	167	+	ENSG00000271792.1	lincRNA	CTB-35F21.5	OTTHUMG00000185580.1	lincRNA	2	11.976
chr5	146706381	146707600	1219	-	ENSG00000248568.1	processed_pseudogene	KRT8P48	OTTHUMG00000163409.1	pseudogene	1	0.820345
chr5	147887112	147887704	592	+	ENSG00000251320.1	antisense	CTC-327F10.4	OTTHUMG00000163419.1	lncRNA	1	1.68919
chr5	149430286	149432834	2548	+	ENSG00000269936.3	lincRNA	RP11-394O4.5	OTTHUMG00000184101.1	lincRNA	2	0.784929
chr5	151319422	151319776	354	+	ENSG00000270904.1	processed_pseudogene	CTC-224D3.1	OTTHUMG00000184553.1	pseudogene	1	2.82486
chr5	159950493	159951498	1005	-	ENSG00000248626.1	processed_pseudogene	GAPDHP40	OTTHUMG00000159985.1	pseudogene	1	0.995025
chr5	173144162	173145039	877	-	ENSG00000253172.1	antisense	CTC-209H22.3	OTTHUMG00000163320.1	lncRNA	1	1.14025
chr5	174056060	174056585	525	-	ENSG00000253244.1	antisense	RP11-619L12.3	OTTHUMG00000163446.1	lncRNA	1	1.90476
chr5	177554824	177555364	540	+	ENSG00000272459.1	lincRNA	RP11-1277A3.3	OTTHUMG00000185636.1	lincRNA	1	1.85185
chr6	2910613	2912113	1500	-	ENSG00000232999.1	unitary_pseudogene	RP1-90J20.10	OTTHUMG00000155040.1	pseudogene	1	0.666667
chr6	2987967	2991173	3206	+	ENSG00000244041.7	lincRNA	LINC01011	OTTHUMG00000014128.5	lincRNA	2	0.62383
chr6	3055890	3056761	871	+	ENSG00000229282.1	lincRNA	RP1-40E16.2	OTTHUMG00000014139.1	lincRNA	2	2.29621
chr6	3068045	3068894	849	-	ENSG00000272277.1	antisense	RP1-40E16.12	OTTHUMG00000185651.1	lncRNA	2	2.35571
chr6	3978062	3979099	1037	+	ENSG00000216657.1	processed_pseudogene	GLRX3P2	OTTHUMG00000014155.1	pseudogene	2	1.92864
chr6	4018713	4019202	489	+	ENSG00000272248.1	lincRNA	RP3-406P24.4	OTTHUMG00000185653.1	lincRNA	1	2.04499
chr6	6758276	6759291	1015	-	ENSG00000224532.2	lincRNA	RP3-470L22.1	OTTHUMG00000014193.2	lincRNA	1	0.985222
chr6	7338839	7339568	729	-	ENSG00000220472.1	processed_pseudogene	RP11-69L16.5	OTTHUMG00000014205.1	pseudogene	2	2.74348
chr6	13614111	13615155	1044	-	ENSG00000261071.1	antisense	RP1-223E5.4	OTTHUMG00000175899.1	lncRNA	1	0.957854
chr6	26321876	26322292	416	-	ENSG00000220875.1	processed_pseudogene	HIST1H3PS1	OTTHUMG00000014455.1	pseudogene	1	2.40385
chr6	28837869	28839006	1137	-	ENSG00000225173.1	lincRNA	XXbac-BPG308K3.5	OTTHUMG00000084883.1	lincRNA	1	0.879507
chr6	28896530	28897322	792	+	ENSG00000224157.1	antisense	HCG14	OTTHUMG00000031281.1	lncRNA	1	1.26263
chr6	29071824	29072599	775	-	ENSG00000236909.1	unprocessed_pseudogene	OR2P1P	OTTHUMG00000031042.3	pseudogene	1	1.29032
chr6	29975112	29978410	3298	+	ENSG00000204625.10	lincRNA	HCG9	OTTHUMG00000031119.5	lincRNA	2	0.606428
chr6	30742929	30743592	663	+	ENSG00000272273.1	antisense	XXbac-BPG252P9.10	OTTHUMG00000185725.1	lncRNA	1	1.5083
chr6	31366352	31366898	546	-	ENSG00000228432.1	processed_pseudogene	DHFRP2	OTTHUMG00000031113.2	pseudogene	1	1.8315
chr6	31441667	31446973	5306	+	ENSG00000230174.1	lincRNA	LINC01149	OTTHUMG00000133747.1	lincRNA	3	0.565398
chr6	32970232	32970886	654	+	ENSG00000223837.2	sense_intronic	BRD2-IT1	OTTHUMG00000140321.2	lncRNA	1	1.52905
chr6	63571005	63572408	1403	-	ENSG00000266680.1	antisense	RP5-1148A21.3	OTTHUMG00000179475.1	lncRNA	1	0.712758
chr6	72522641	72523238	597	+	ENSG00000217483.1	processed_pseudogene	RP11-135M8__A.1	OTTHUMG00000015011.1	pseudogene	1	1.67504
chr6	85659892	85660606	714	-	ENSG00000220563.1	processed_pseudogene	PKMP3	OTTHUMG00000015143.1	pseudogene	1	1.40056
chr6	109382795	109383666	871	+	ENSG00000260273.1	antisense	RP11-425D10.10	OTTHUMG00000175937.1	lncRNA	1	1.14811
chr6	136550661	136552554	1893	+	ENSG00000272189.1	antisense	RP3-325F22.5	OTTHUMG00000185823.1	lncRNA	1	0.528262
chr6	137705423	137707201	1778	-	ENSG00000220412.1	processed_pseudogene	RP11-95M15.2	OTTHUMG00000015660.1	pseudogene	1	0.56243
chr6	152898047	152899280	1233	+	ENSG00000217372.2	processed_pseudogene	TUBB4BP7	OTTHUMG00000015853.2	pseudogene	1	0.81103
chr6	156662050	156662437	387	+	ENSG00000220347.1	processed_pseudogene	RP11-230C9.1	OTTHUMG00000015886.1	pseudogene	1	2.58398
chr6	166275462	166277077	1615	-	ENSG00000280850.1	lincRNA	RP4-655C5.9	OTTHUMG00000190284.1	lincRNA	1	0.619195
chr6	167767083	167768568	1485	-	ENSG00000213065.2	processed_pseudogene	RP3-431P23.2	OTTHUMG00000016028.1	pseudogene	1	0.673401
chr7	12685637	12686033	396	+	ENSG00000271253.1	processed_pseudogene	CTD-2320J21.1	OTTHUMG00000184480.1	pseudogene	1	2.52525
chr7	22725395	22727620	2225	-	ENSG00000179428.2	antisense	AC073072.5	OTTHUMG00000152547.1	lncRNA	2	0.898876
chr7	50141540	50142823	1283	-	ENSG00000228005.1	antisense	AC020743.2	OTTHUMG00000155880.1	lncRNA	1	0.779423
chr7	55593777	55595006	1229	+	ENSG00000231394.1	lincRNA	RP11-310H4.3	OTTHUMG00000156122.1	lincRNA	1	0.81367
chr7	73735038	73736054	1016	+	ENSG00000225969.1	antisense	ABHD11-AS1	OTTHUMG00000153263.1	lncRNA	1	0.984252
chr7	105013425	105014321	896	-	ENSG00000239569.3	antisense	KMT2E-AS1	OTTHUMG00000157280.1	lncRNA	1	1.11607
chr7	107742817	107744581	1764	-	ENSG00000241764.3	antisense	AC002467.7	OTTHUMG00000154805.3	lncRNA	1	0.566893
chr7	121398452	121398767	315	+	ENSG00000213310.3	processed_pseudogene	CYCSP19	OTTHUMG00000157004.1	pseudogene	1	3.1746
chr7	131753746	131754252	506	-	ENSG00000236281.1	processed_pseudogene	AC093106.5	OTTHUMG00000155054.1	pseudogene	2	3.95257
chr7	135168403	135169547	1144	+	ENSG00000272941.1	antisense	RP11-134L10.1	OTTHUMG00000186343.1	lncRNA	1	0.874126
chr7	138645671	138646448	777	-	ENSG00000234658.1	processed_pseudogene	AC013429.4	OTTHUMG00000155874.3	pseudogene	1	1.287
chr7	143379692	143380495	803	-	ENSG00000232533.1	antisense	AC093673.5	OTTHUMG00000152694.1	lncRNA	1	1.24533
chr7	151028781	151029754	973	-	ENSG00000243433.1	antisense	RP11-148K1.10	OTTHUMG00000158684.1	lncRNA	1	1.02775
chr7	155295918	155297541	1623	-	ENSG00000273117.1	lincRNA	AC144652.1	OTTHUMG00000186379.1	lincRNA	1	0.616143
chr8	4787332	4788584	1252	+	ENSG00000254244.1	processed_pseudogene	PAICSP4	OTTHUMG00000163651.1	pseudogene	1	0.798722
chr8	6928608	6930473	1865	+	ENSG00000254625.1	antisense	GS1-24F4.3	OTTHUMG00000165211.1	lncRNA	1	0.536193
chr8	11553224	11554207	983	-	ENSG00000254774.1	antisense	RP11-148O21.3	OTTHUMG00000165415.1	lncRNA	2	2.03459
chr8	15806149	15807283	1134	-	ENSG00000250483.1	processed_pseudogene	PPM1AP1	OTTHUMG00000161571.1	pseudogene	1	0.881834
chr8	31497423	31498612	1189	+	ENSG00000253275.1	lincRNA	RP11-566H8.1	OTTHUMG00000163914.1	lincRNA	1	0.841043
chr8	37516410	37517021	611	-	ENSG00000253414.2	sense_intronic	RP11-150O12.6	OTTHUMG00000164286.2	lncRNA	1	1.63666
chr8	38400536	38401683	1147	-	ENSG00000254981.1	antisense	RP11-350N15.3	OTTHUMG00000165098.1	lncRNA	1	0.87184
chr8	41828165	41829934	1769	-	ENSG00000260588.1	lincRNA	RP11-930P14.2	OTTHUMG00000164085.2	lincRNA	1	0.565291
chr8	47194002	47194347	345	-	ENSG00000253502.1	processed_pseudogene	ATP6V1G1P2	OTTHUMG00000164147.1	pseudogene	1	2.89855
chr8	47511034	47512141	1107	-	ENSG00000253330.1	processed_pseudogene	RP11-697N18.3	OTTHUMG00000164177.1	pseudogene	1	0.903342
chr8	51810110	51810681	571	-	ENSG00000272076.1	lincRNA	RP11-11C20.3	OTTHUMG00000185455.1	lincRNA	1	1.75131
chr8	56074592	56075274	682	+	ENSG00000253603.1	antisense	CTA-397H3.3	OTTHUMG00000164298.1	lncRNA	1	1.46628
chr8	97788210	97788357	147	-	ENSG00000270682.1	processed_pseudogene	KB-1907C4.2	OTTHUMG00000184717.1	pseudogene	1	6.80272
chr8	104990308	104990692	384	-	ENSG00000253997.1	processed_pseudogene	RP11-200A13.3	OTTHUMG00000164815.1	pseudogene	2	5.20833
chr8	122779971	122780830	859	-	ENSG00000272384.1	lincRNA	RP11-44N11.2	OTTHUMG00000185333.1	lincRNA	1	1.16414
chr8	127400399	127402150	1751	+	ENSG00000280997.1	lincRNA	CCAT2	OTTHUMG00000189734.1	lincRNA	2	1.1422
chr8	129728744	129730445	1701	+	ENSG00000224110.3	processed_pseudogene	MTRF1LP2	OTTHUMG00000160430.1	pseudogene	2	1.17578
chr8	134832747	134834482	1735	+	ENSG00000254028.1	lincRNA	AC083843.2	OTTHUMG00000164325.1	lincRNA	1	0.576369
chr8	140636281	140638283	2002	+	ENSG00000280303.2	lincRNA	ERICD	OTTHUMG00000164249.2	lincRNA	3	1.4985
chr8	142727283	142727690	407	-	ENSG00000253806.1	antisense	CTD-2292P10.2	OTTHUMG00000164674.1	lncRNA	1	2.457
chr8	143280161	143281690	1529	-	ENSG00000253716.5	antisense	LINC01604	OTTHUMG00000164976.1	lncRNA	1	0.654022
chr8	144409492	144409976	484	+	ENSG00000272115.1	antisense	GS1-393G12.14	OTTHUMG00000185629.1	lncRNA	1	2.06612
chr9	21135598	21136350	752	-	ENSG00000275980.1	processed_pseudogene	RP11-113D19.9	OTTHUMG00000187719.1	pseudogene	1	1.32979
chr9	21455484	21456049	565	+	ENSG00000238271.2	unprocessed_pseudogene	IFNWP19	OTTHUMG00000019680.2	pseudogene	1	1.76991
chr9	32333457	32334354	897	-	ENSG00000225347.1	processed_pseudogene	SLC25A5P8	OTTHUMG00000019739.1	pseudogene	1	1.11483
chr9	33624274	33625293	1019	+	ENSG00000231991.4	processed_pseudogene	ANXA2P2	OTTHUMG00000019778.4	pseudogene	1	0.981354
chr9	33719690	33722555	2865	+	ENSG00000227301.1	lincRNA	RP11-384P7.5	OTTHUMG00000000412.1	lincRNA	2	0.69808
chr9	34191555	34191881	326	+	ENSG00000227383.1	processed_pseudogene	RP11-571F15.2	OTTHUMG00000019811.2	pseudogene	1	3.06748
chr9	34546524	34546996	472	-	ENSG00000232983.2	processed_pseudogene	RP11-296L22.7	OTTHUMG00000000444.2	pseudogene	1	2.11864
chr9	35096378	35098141	1763	+	ENSG00000234181.1	antisense	RP11-182N22.8	OTTHUMG00000019849.1	lncRNA	2	1.13443
chr9	35646270	35647099	829	+	ENSG00000227933.1	antisense	RP11-331F9.4	OTTHUMG00000019866.1	lncRNA	1	1.20627
chr9	35756712	35757940	1228	-	ENSG00000228843.2	antisense	RP11-112J3.15	OTTHUMG00000019883.2	lncRNA	1	0.814332
chr9	37509150	37510299	1149	+	ENSG00000234160.1	antisense	RP11-613M10.6	OTTHUMG00000019924.1	lncRNA	1	0.870322
chr9	69672749	69673713	964	+	ENSG00000261447.1	lincRNA	RP11-109D9.4	OTTHUMG00000175664.1	lincRNA	1	1.03734
chr9	76419934	76420631	697	+	ENSG00000233814.1	processed_pseudogene	RP11-66C24.1	OTTHUMG00000020042.1	pseudogene	1	1.43472
chr9	86414282	86414570	288	+	ENSG00000235819.1	lincRNA	RP11-359J6.1	OTTHUMG00000020138.1	lincRNA	1	3.47222
chr9	91426238	91427144	906	+	ENSG00000233081.1	lincRNA	RP11-440G5.2	OTTHUMG00000020208.1	lincRNA	1	1.10375
chr9	95506235	95507636	1401	+	ENSG00000271155.1	antisense	RP11-435O5.5	OTTHUMG00000185271.1	lncRNA	2	1.42755
chr9	99183373	99184891	1518	+	ENSG00000227269.1	lincRNA	RP11-96L7.2	OTTHUMG00000020352.1	lincRNA	1	0.658762
chr9	121279863	121282730	2867	-	ENSG00000239593.1	antisense	RP11-477J21.6	OTTHUMG00000020588.1	lncRNA	2	0.697593
chr9	122400970	122402906	1936	-	ENSG00000233616.2	lincRNA	RP11-542K23.10	OTTHUMG00000020610.2	lincRNA	1	0.516529
chr9	122837557	122838820	1263	+	ENSG00000233425.1	processed_pseudogene	KRT18P67	OTTHUMG00000020626.1	pseudogene	1	0.791766
chr9	128663134	128663578	444	-	ENSG00000234705.1	antisense	HMGA1P4	OTTHUMG00000020753.1	lncRNA	1	2.25225
chr9	129480605	129482538	1933	-	ENSG00000261334.1	lincRNA	RP11-65J3.14	OTTHUMG00000175667.1	lincRNA	2	1.03466
chr9	134168769	134169340	571	+	ENSG00000273473.1	lincRNA	LL09NC01-139C3.1	OTTHUMG00000186052.1	lincRNA	1	1.75131
chr9	136122521	136124363	1842	+	ENSG00000275329.1	lincRNA	RP11-83N9.6	OTTHUMG00000187245.1	lincRNA	1	0.542888
chr9	136975094	136976981	1887	+	ENSG00000238268.2	lincRNA	RP11-229P13.19	OTTHUMG00000020963.2	lincRNA	1	0.529942
chr9	137063535	137064581	1046	+	ENSG00000231864.2	antisense	RP11-229P13.23	OTTHUMG00000020975.2	lncRNA	1	0.956023
chr9	137286112	137287236	1124	+	ENSG00000270259.2	processed_pseudogene	RP13-122B23.9	OTTHUMG00000184711.2	pseudogene	1	0.88968
chr9	137293868	137295721	1853	-	ENSG00000260996.1	sense_overlapping	RP13-122B23.8	OTTHUMG00000175633.1	lncRNA	1	0.539665
chr10	5776071	5776858	787	+	ENSG00000270427.1	processed_pseudogene	NRBF2P5	OTTHUMG00000184677.1	pseudogene	1	1.27065
chr10	8052242	8053449	1207	-	ENSG00000243350.1	lincRNA	RP11-379F12.3	OTTHUMG00000017641.1	lincRNA	1	0.8285
chr10	72274915	72275980	1065	-	ENSG00000269926.1	antisense	RP11-442H21.2	OTTHUMG00000018435.2	lncRNA	1	0.938967
chr10	73252791	73254349	1558	+	ENSG00000227540.1	antisense	RP11-152N13.5	OTTHUMG00000018458.1	lncRNA	1	0.641849
chr10	88727485	88728914	1429	+	ENSG00000226358.1	processed_pseudogene	KRT8P38	OTTHUMG00000018697.1	pseudogene	1	0.69979
chr10	91908131	91909348	1217	+	ENSG00000272817.1	antisense	RP11-402D21.2	OTTHUMG00000186460.1	lncRNA	1	0.821693
chr10	95183653	95184217	564	+	ENSG00000225533.1	processed_pseudogene	PAWRP1	OTTHUMG00000018807.1	pseudogene	1	1.77305
chr10	101060029	101061005	976	-	ENSG00000273162.1	lincRNA	RP11-108L7.15	OTTHUMG00000186479.1	lincRNA	1	1.02459
chr10	119208531	119211760	3229	+	ENSG00000228485.1	sense_intronic	GRK5-IT1	OTTHUMG00000019145.1	lncRNA	2	0.619387
chr10	131980240	131981337	1097	+	ENSG00000273521.1	antisense	RP11-45A17.4	OTTHUMG00000186612.1	lncRNA	1	0.911577
chr10	133246478	133247891	1413	-	ENSG00000166917.8	antisense	MIR202HG	OTTHUMG00000170605.1	lncRNA	1	0.707714
chr11	3854318	3855509	1191	-	ENSG00000228661.1	antisense	AC090587.5	OTTHUMG00000012285.1	lncRNA	1	0.839631
chr11	3854612	3855399	787	+	ENSG00000229368.1	sense_overlapping	AC090587.4	OTTHUMG00000012284.1	lncRNA	1	1.27065
chr11	6297189	6298606	1417	-	ENSG00000270435.1	processed_pseudogene	RP11-304C12.4	OTTHUMG00000184841.1	pseudogene	3	2.11715
chr11	6323554	6324023	469	+	ENSG00000282556.1	lincRNA	RP11-304C12.5	OTTHUMG00000191408.1	lincRNA	1	2.1322
chr11	6603642	6604420	778	-	ENSG00000254400.1	antisense	RP11-732A19.8	OTTHUMG00000166620.1	lncRNA	1	1.28535
chr11	9094377	9095890	1513	+	ENSG00000213538.5	processed_pseudogene	KRT8P41	OTTHUMG00000165715.1	pseudogene	1	0.660939
chr11	12086891	12089441	2550	+	ENSG00000255400.1	lincRNA	RP13-631K18.5	OTTHUMG00000165727.1	lincRNA	2	0.784314
chr11	14907518	14907986	468	+	ENSG00000253179.1	unprocessed_pseudogene	CALCP	OTTHUMG00000164573.23	pseudogene	1	2.13675
chr11	31280672	31280987	315	-	ENSG00000255370.1	processed_pseudogene	CYCSP25	OTTHUMG00000166209.1	pseudogene	1	3.1746
chr11	43943787	43947206	3419	-	ENSG00000244953.1	lincRNA	RP11-613D13.8	OTTHUMG00000166556.1	lincRNA	2	0.584966
chr11	45771432	45772358	926	+	ENSG00000205106.4	lincRNA	DKFZp779M0652	OTTHUMG00000166518.1	lincRNA	2	2.15983
chr11	46238382	46239267	885	+	ENSG00000254639.1	lincRNA	CTD-2589M5.5	OTTHUMG00000166909.1	lincRNA	1	1.12994
chr11	47270657	47272110	1453	-	ENSG00000256746.5	antisense	RP11-17G12.3	OTTHUMG00000167884.1	lncRNA	1	0.688231
chr11	55714996	55715632	636	+	ENSG00000254457.1	unprocessed_pseudogene	OR5D2P	OTTHUMG00000166804.1	pseudogene	1	1.57233
chr11	55726118	55727158	1040	+	ENSG00000186886.6	unprocessed_pseudogene	OR5D3P	OTTHUMG00000166805.2	pseudogene	1	0.961538
chr11	57476493	57477534	1041	-	ENSG00000255301.1	antisense	RP11-624G17.3	OTTHUMG00000167029.1	lncRNA	1	0.960615
chr11	59263389	59263802	413	-	ENSG00000254799.1	processed_pseudogene	SLC25A47P1	OTTHUMG00000167415.1	pseudogene	1	2.42131
chr11	59531754	59532695	941	+	ENSG00000254770.1	unprocessed_pseudogene	OR4D7P	OTTHUMG00000167344.1	pseudogene	1	1.0627
chr11	59753015	59754975	1960	-	ENSG00000254477.1	antisense	AP000640.10	OTTHUMG00000167407.1	lncRNA	1	0.510204
chr11	62786023	62786785	762	-	ENSG00000269176.2	antisense	RP11-727F15.12	OTTHUMG00000183002.2	lncRNA	1	1.31234
chr11	64449074	64451657	2583	+	ENSG00000181908.5	lincRNA	AP003774.4	OTTHUMG00000046124.3	lincRNA	2	0.774293
chr11	65498010	65498405	395	-	ENSG00000270117.1	lincRNA	AP000769.7	OTTHUMG00000184021.1	lincRNA	1	2.53165
chr11	65568482	65570423	1941	-	ENSG00000260233.3	processed_transcript	SSSCA1-AS1	OTTHUMG00000166387.2	processed_transcript	1	0.515198
chr11	65726939	65728214	1275	+	ENSG00000214659.4	processed_pseudogene	KRT8P26	OTTHUMG00000166591.1	pseudogene	1	0.784314
chr11	66067277	66069619	2342	-	ENSG00000255038.1	antisense	RP11-1167A19.2	OTTHUMG00000166666.1	lncRNA	2	0.853971
chr11	66264777	66265666	889	-	ENSG00000254855.1	antisense	RP11-867G23.1	OTTHUMG00000166905.1	lncRNA	1	1.12486
chr11	67195569	67197167	1598	-	ENSG00000179038.8	transcribed_processed_pseudogene	RP11-157K17.5	OTTHUMG00000187455.1	pseudogene	1	0.625782
chr11	67374416	67374932	516	+	ENSG00000275484.1	lincRNA	CTC-1337H24.4	OTTHUMG00000188153.1	lincRNA	1	1.93798
chr11	67612653	67616257	3604	-	ENSG00000231793.4	unitary_pseudogene	DOC2GP	OTTHUMG00000154229.1	pseudogene	2	0.554939
chr11	69000765	69002048	1283	-	ENSG00000261625.1	sense_overlapping	RP11-554A11.4	OTTHUMG00000172938.1	lncRNA	1	0.779423
chr11	69909184	69910994	1810	-	ENSG00000260348.1	lincRNA	RP11-643C9.1	OTTHUMG00000175910.1	lincRNA	2	1.10497
chr11	72351347	72353210	1863	+	ENSG00000256739.1	antisense	RP11-45F15.1	OTTHUMG00000167904.1	lncRNA	2	1.07354
chr11	73760563	73761070	507	+	ENSG00000256034.1	antisense	RP11-707G14.1	OTTHUMG00000168031.1	lncRNA	1	1.97239
chr11	89498748	89499198	450	-	ENSG00000255295.1	processed_pseudogene	RP11-745I13.1	OTTHUMG00000167299.1	pseudogene	1	2.22222
chr11	102306112	102306271	159	+	ENSG00000270868.1	processed_pseudogene	RP11-864G5.7	OTTHUMG00000184750.1	pseudogene	1	6.28931
chr11	118688039	118690600	2561	-	ENSG00000255239.1	unprocessed_pseudogene	AP002954.6	OTTHUMG00000166410.1	pseudogene	2	0.780945
chr11	118885841	118887742	1901	-	ENSG00000245869.2	antisense	RP11-158I9.5	OTTHUMG00000166413.1	lncRNA	1	0.526039
chr11	119044188	119045493	1305	+	ENSG00000255114.1	antisense	RP11-110I1.6	OTTHUMG00000166353.1	lncRNA	1	0.766284
chr11	119065263	119065677	414	-	ENSG00000271751.1	lincRNA	RP11-110I1.14	OTTHUMG00000185714.1	lincRNA	1	2.41546
chr11	120168977	120171679	2702	+	ENSG00000176984.6	antisense	AP000679.2	OTTHUMG00000166138.3	lncRNA	2	0.740192
chr11	124891304	124892126	822	+	ENSG00000254943.1	antisense	RP11-664I21.6	OTTHUMG00000165937.1	lncRNA	1	1.21655
chr12	6537794	6538370	576	-	ENSG00000269968.1	antisense	RP5-940J5.9	OTTHUMG00000183895.1	lncRNA	1	1.73611
chr12	6943508	6944604	1096	-	ENSG00000272173.1	antisense	U47924.31	OTTHUMG00000185702.1	lncRNA	1	0.912409
chr12	6964949	6965382	433	+	ENSG00000271969.1	antisense	U47924.29	OTTHUMG00000185704.1	lncRNA	1	2.30947
chr12	7860437	7860764	327	+	ENSG00000241828.2	processed_pseudogene	RP11-277J24.1	OTTHUMG00000157430.2	pseudogene	1	3.0581
chr12	9135084	9135591	507	+	ENSG00000256720.1	processed_pseudogene	BTG1P1	OTTHUMG00000168328.1	pseudogene	1	1.97239
chr12	11512723	11514136	1413	+	ENSG00000270863.1	processed_pseudogene	DDX55P1	OTTHUMG00000184770.1	pseudogene	1	0.707714
chr12	12355406	12357067	1661	-	ENSG00000205791.3	lincRNA	LOH12CR2	OTTHUMG00000187482.1	lincRNA	1	0.602047
chr12	15151923	15155283	3360	+	ENSG00000255660.1	lincRNA	RERG-AS1	OTTHUMG00000168747.1	lincRNA	2	0.595238
chr12	25385670	25386241	571	-	ENSG00000278743.1	lincRNA	RP11-707G18.1	OTTHUMG00000187136.1	lincRNA	1	1.75131
chr12	47817451	47817966	515	-	ENSG00000274737.1	sense_intronic	RP5-1057I20.6	OTTHUMG00000187387.2	lncRNA	1	1.94175
chr12	48442030	48442947	917	-	ENSG00000226413.2	unprocessed_pseudogene	OR8T1P	OTTHUMG00000154311.2	pseudogene	1	1.09051
chr12	48995150	48996334	1184	+	ENSG00000258283.1	antisense	RP11-386G11.3	OTTHUMG00000170404.1	lncRNA	1	0.844595
chr12	53159586	53161000	1414	+	ENSG00000257808.1	lincRNA	RP11-1136G11.8	OTTHUMG00000170026.1	lincRNA	2	1.41443
chr12	53981509	53985519	4010	-	ENSG00000251151.2	processed_transcript	HOXC-AS3	OTTHUMG00000160025.1	processed_transcript	4	0.997506
chr12	56118968	56119939	971	-	ENSG00000258345.1	antisense	RP11-603J24.6	OTTHUMG00000170141.1	lncRNA	1	1.02987
chr12	56376818	56377331	513	-	ENSG00000274823.1	processed_pseudogene	RP11-348M3.6	OTTHUMG00000188037.1	pseudogene	1	1.94932
chr12	62021570	62022174	604	-	ENSG00000213363.4	processed_pseudogene	RPS3P6	OTTHUMG00000157595.1	pseudogene	1	1.65563
chr12	62601751	62603690	1939	-	ENSG00000221949.5	lincRNA	LINC01465	OTTHUMG00000169983.2	lincRNA	1	0.51573
chr12	67440998	67442559	1561	-	ENSG00000256172.1	lincRNA	RP11-473M14.3	OTTHUMG00000169068.1	lincRNA	1	0.640615
chr12	68001394	68001548	154	-	ENSG00000244432.2	processed_pseudogene	RPL39P28	OTTHUMG00000157610.2	pseudogene	1	6.49351
chr12	69284397	69285485	1088	+	ENSG00000257818.1	processed_pseudogene	C1GALT1P1	OTTHUMG00000169341.1	pseudogene	1	0.919118
chr12	75333798	75334486	688	-	ENSG00000273987.1	sense_intronic	RP11-585P4.6	OTTHUMG00000187280.1	lncRNA	1	1.45349
chr12	76878193	76880352	2159	+	ENSG00000257910.1	antisense	RP11-461F16.3	OTTHUMG00000169920.1	lncRNA	2	0.926355
chr12	94140077	94141337	1260	+	ENSG00000257360.1	processed_pseudogene	RP11-74K11.1	OTTHUMG00000170234.1	pseudogene	1	0.793651
chr12	101773114	101773755	641	-	ENSG00000258230.2	transcribed_processed_pseudogene	RP11-511H9.3	OTTHUMG00000170445.2	pseudogene	1	1.56006
chr12	103503381	103504936	1555	+	ENSG00000257415.1	processed_pseudogene	RP11-626I20.1	OTTHUMG00000170053.1	pseudogene	1	0.643087
chr12	117889454	117891008	1554	+	ENSG00000256071.1	antisense	RP11-465L8.1	OTTHUMG00000169021.1	lncRNA	1	0.643501
chr12	118375350	118376275	925	-	ENSG00000270482.1	lincRNA	RP11-131L12.2	OTTHUMG00000185168.1	lincRNA	1	1.08108
chr12	120224744	120225421	677	+	ENSG00000275936.1	antisense	RP1-278C19.8	OTTHUMG00000187240.1	lncRNA	1	1.4771
chr12	122501187	122501641	454	+	ENSG00000275265.1	lincRNA	RP11-15J22.8	OTTHUMG00000187270.1	lincRNA	1	2.20264
chr12	122865335	122867021	1686	+	ENSG00000256152.2	lincRNA	RP11-463O12.3	OTTHUMG00000168766.2	lincRNA	1	0.59312
chr12	130047132	130048376	1244	+	ENSG00000256298.1	lincRNA	RP11-474D1.1	OTTHUMG00000168374.1	lincRNA	1	0.803859
chr12	132282814	132284606	1792	+	ENSG00000277011.1	lincRNA	RP13-895J2.6	OTTHUMG00000167983.1	lincRNA	1	0.558036
chr13	19587118	19588350	1232	+	ENSG00000225316.1	lincRNA	LINC00350	OTTHUMG00000016497.1	lincRNA	1	0.811688
chr13	19818121	19818619	498	-	ENSG00000233469.1	processed_pseudogene	ST6GALNAC4P1	OTTHUMG00000016501.1	pseudogene	2	4.01606
chr13	19863858	19865048	1190	+	ENSG00000275964.1	lincRNA	RP11-61K9.3	OTTHUMG00000187050.1	lincRNA	1	0.840336
chr13	27953526	27955370	1844	+	ENSG00000260704.1	lincRNA	LINC00543	OTTHUMG00000170880.1	lincRNA	1	0.542299
chr13	33610967	33611522	555	+	ENSG00000234535.1	lincRNA	RP11-37L2.1	OTTHUMG00000016713.1	lincRNA	1	1.8018
chr13	41384773	41385183	410	-	ENSG00000214222.2	processed_pseudogene	TUBBP2	OTTHUMG00000016794.1	pseudogene	1	2.43902
chr13	43158631	43159466	835	+	ENSG00000229928.1	lincRNA	LINC00400	OTTHUMG00000016815.1	lincRNA	1	1.1976
chr13	102903339	102904000	661	+	ENSG00000278445.1	lincRNA	RP11-255P5.3	OTTHUMG00000187302.1	lincRNA	2	3.02572
chr13	106376563	106378217	1654	+	ENSG00000233532.5	lincRNA	LINC00460	OTTHUMG00000017319.1	lincRNA	1	0.604595
chr14	20305730	20306811	1081	+	ENSG00000258459.1	antisense	CTD-2292M16.7	OTTHUMG00000170853.1	lncRNA	1	0.925069
chr14	22556311	22557062	751	-	ENSG00000259054.1	lincRNA	AE000662.93	OTTHUMG00000170967.2	lincRNA	2	2.66312
chr14	22556640	22559037	2397	+	ENSG00000259003.1	lincRNA	AE000662.92	OTTHUMG00000170968.2	lincRNA	2	0.834376
chr14	23293852	23295798	1946	+	ENSG00000270433.1	transcribed_unprocessed_pseudogene	RP11-124D2.7	OTTHUMG00000184412.1	pseudogene	2	1.02775
chr14	25431193	25432234	1041	-	ENSG00000257976.1	processed_pseudogene	RP11-388G3.1	OTTHUMG00000170317.1	pseudogene	1	0.960615
chr14	48398310	48399375	1065	+	ENSG00000258750.2	processed_pseudogene	RP11-2G1.2	OTTHUMG00000170799.2	pseudogene	1	0.938967
chr14	49620815	49623480	2665	-	ENSG00000258377.1	antisense	RP11-649E7.5	OTTHUMG00000170874.1	lncRNA	2	0.750469
chr14	49677369	49677893	524	+	ENSG00000259155.2	processed_pseudogene	RP11-831F12.3	OTTHUMG00000170875.2	pseudogene	1	1.9084
chr14	65411170	65412690	1520	-	ENSG00000276116.2	antisense	FUT8-AS1	OTTHUMG00000186893.2	lncRNA	1	0.657895
chr14	73539221	73539781	560	-	ENSG00000258408.1	processed_pseudogene	NT5CP2	OTTHUMG00000171604.1	pseudogene	1	1.78571
chr14	73571159	73571667	508	-	ENSG00000258524.1	processed_pseudogene	NT5CP1	OTTHUMG00000171605.1	pseudogene	1	1.9685
chr14	73631475	73632019	544	+	ENSG00000258972.1	processed_pseudogene	NDUFB8P1	OTTHUMG00000171641.1	pseudogene	1	1.83824
chr14	75970924	75971587	663	+	ENSG00000258876.1	lincRNA	RP11-270M14.5	OTTHUMG00000171614.1	lincRNA	1	1.5083
chr14	85528599	85529386	787	+	ENSG00000258945.1	lincRNA	RP11-497E19.2	OTTHUMG00000171371.1	lincRNA	1	1.27065
chr14	91418266	91421176	2910	+	ENSG00000258798.1	lincRNA	RP11-895M11.3	OTTHUMG00000171100.1	lincRNA	2	0.687285
chr14	93138066	93138465	399	+	ENSG00000258595.2	processed_pseudogene	RP11-371E8.2	OTTHUMG00000171264.2	pseudogene	1	2.50627
chr14	95516136	95517911	1775	+	ENSG00000258572.1	lincRNA	RP11-1070N10.3	OTTHUMG00000171637.1	lincRNA	1	0.56338
chr14	96275046	96276723	1677	-	ENSG00000258729.2	lincRNA	RP11-404P21.6	OTTHUMG00000171413.1	lincRNA	1	0.596303
chr14	101843394	101844122	728	-	ENSG00000259161.2	processed_pseudogene	CTD-2017C7.3	OTTHUMG00000171643.2	pseudogene	1	1.37363
chr14	103694516	103695050	534	-	ENSG00000269910.1	antisense	RP11-73M18.10	OTTHUMG00000183944.1	lncRNA	1	1.87266
chr14	103694560	103695170	610	+	ENSG00000269940.1	sense_intronic	RP11-73M18.7	OTTHUMG00000183945.1	lncRNA	1	1.63934
chr14	104137150	104137898	748	-	ENSG00000258748.1	antisense	CTD-2223O18.1	OTTHUMG00000171595.1	lncRNA	1	1.3369
chr14	106286811	106287657	846	-	ENSG00000238275.2	processed_pseudogene	HOMER2P2	OTTHUMG00000152092.2	pseudogene	1	1.18203
chr14	106436415	106436555	140	-	ENSG00000228757.1	unprocessed_pseudogene	AB019438.66	OTTHUMG00000152076.2	pseudogene	1	7.14286
chr14	106460092	106461055	963	-	ENSG00000228966.2	processed_pseudogene	HOMER2P1	OTTHUMG00000152103.3	pseudogene	1	1.03842
chr15	25345633	25347235	1602	-	ENSG00000261529.1	sense_intronic	RP13-487P22.1	OTTHUMG00000176881.1	lncRNA	1	0.62422
chr15	29612570	29614274	1704	+	ENSG00000259300.2	processed_pseudogene	TUBBP8	OTTHUMG00000172188.3	pseudogene	1	0.586854
chr15	41016990	41018843	1853	-	ENSG00000280036.1	sense_intronic	RP11-540O11.8	OTTHUMG00000172520.1	lncRNA	1	0.539665
chr15	41770756	41772732	1976	-	ENSG00000260814.2	lincRNA	RP11-107F6.3	OTTHUMG00000172724.2	lincRNA	1	0.506073
chr15	45198517	45199139	622	-	ENSG00000259932.1	sense_intronic	CTD-2651B20.7	OTTHUMG00000172833.1	lncRNA	1	1.60772
chr15	45215547	45215943	396	+	ENSG00000259338.1	processed_pseudogene	CTD-2651B20.2	OTTHUMG00000172001.1	pseudogene	1	2.52525
chr15	48810701	48811909	1208	+	ENSG00000259700.3	processed_transcript	RP11-485O10.3	OTTHUMG00000172160.1	processed_transcript	1	0.827815
chr15	49177610	49178741	1131	-	ENSG00000259545.2	processed_pseudogene	RP11-325E5.4	OTTHUMG00000172327.2	pseudogene	1	0.884173
chr15	56887107	56888219	1112	+	ENSG00000276524.1	lincRNA	RP11-323F24.3	OTTHUMG00000186905.1	lincRNA	1	0.899281
chr15	57527187	57529009	1822	-	ENSG00000261265.1	lincRNA	CTD-2515H24.4	OTTHUMG00000176408.1	lincRNA	1	0.548847
chr15	62060503	62062434	1931	+	ENSG00000259251.2	antisense	RP11-643M14.1	OTTHUMG00000171941.2	lncRNA	1	0.517866
chr15	63046034	63049387	3353	-	ENSG00000259498.1	antisense	RP11-244F12.3	OTTHUMG00000172299.1	lncRNA	3	0.894721
chr15	74303005	74304343	1338	+	ENSG00000261384.1	sense_intronic	RP11-60L3.2	OTTHUMG00000172634.1	lncRNA	1	0.747384
chr15	74374678	74375511	833	+	ENSG00000274937.1	lincRNA	CTD-2311M21.4	OTTHUMG00000186953.1	lincRNA	1	1.20048
chr15	74976240	74976573	333	-	ENSG00000261813.2	processed_pseudogene	RP11-151H2.3	OTTHUMG00000172712.2	pseudogene	1	3.003
chr15	75452964	75453947	983	-	ENSG00000276744.1	sense_intronic	CTD-2562G15.3	OTTHUMG00000186962.1	lncRNA	1	1.01729
chr15	75639760	75640976	1216	+	ENSG00000275454.1	antisense	CTD-2026K11.4	OTTHUMG00000186970.1	lncRNA	1	0.822368
chr15	77993405	77995289	1884	+	ENSG00000259792.1	antisense	RP11-114H24.6	OTTHUMG00000172984.1	lncRNA	1	0.530786
chr15	84631898	84633987	2089	-	ENSG00000254414.1	antisense	RP11-182J1.1	OTTHUMG00000166531.1	lncRNA	2	0.957396
chr15	86139838	86140240	402	-	ENSG00000261077.1	processed_pseudogene	RP11-553E24.1	OTTHUMG00000172871.1	pseudogene	1	2.48756
chr15	86914443	86916155	1712	+	ENSG00000273540.1	sense_intronic	RP11-133L19.3	OTTHUMG00000172873.1	lncRNA	1	0.584112
chr15	90932586	90935130	2544	-	ENSG00000224441.1	antisense	AC068831.3	OTTHUMG00000141259.1	lncRNA	2	0.786164
chr15	92808451	92809057	606	+	ENSG00000274215.1	lincRNA	CTD-2313J17.6	OTTHUMG00000187014.1	lincRNA	1	1.65017
chr15	94168349	94168751	402	+	ENSG00000258570.1	processed_pseudogene	RP11-452K20.1	OTTHUMG00000171812.1	pseudogene	1	2.48756
chr16	1579242	1580308	1066	-	ENSG00000260954.1	sense_intronic	LA16c-425C2.1	OTTHUMG00000176603.1	lncRNA	2	1.87617
chr16	2857898	2859726	1828	+	ENSG00000263325.1	antisense	LA16c-325D7.1	OTTHUMG00000177362.1	lncRNA	1	0.547046
chr16	3003431	3005101	1670	-	ENSG00000262362.1	sense_overlapping	LA16c-380H5.2	OTTHUMG00000177449.1	lncRNA	1	0.598802
chr16	4839244	4840334	1090	-	ENSG00000275056.1	sense_intronic	RP11-127I20.8	OTTHUMG00000186765.1	lncRNA	1	0.917431
chr16	8869251	8870032	781	+	ENSG00000261481.1	antisense	RP11-77H9.6	OTTHUMG00000176902.1	lncRNA	1	1.28041
chr16	12093627	12095307	1680	-	ENSG00000261293.1	antisense	RP11-276H1.2	OTTHUMG00000172961.2	lncRNA	2	1.19048
chr16	14018880	14021077	2197	-	ENSG00000261856.1	lincRNA	CTD-2135D7.4	OTTHUMG00000177378.1	lincRNA	2	0.910332
chr16	19410729	19411662	933	-	ENSG00000260681.1	antisense	CTA-363E6.5	OTTHUMG00000177223.1	lncRNA	1	1.07181
chr16	21950218	21951708	1490	-	ENSG00000274460.1	processed_transcript	CTD-2649C14.2	OTTHUMG00000186800.1	processed_transcript	1	0.671141
chr16	25106569	25107102	533	-	ENSG00000275494.1	sense_intronic	RP11-266L9.8	OTTHUMG00000186826.1	lncRNA	1	1.87617
chr16	29806496	29807732	1236	-	ENSG00000259952.1	antisense	AC009133.15	OTTHUMG00000177140.1	lncRNA	1	0.809061
chr16	30355441	30357104	1663	+	ENSG00000260219.2	lincRNA	RP11-347C12.10	OTTHUMG00000176862.2	lincRNA	1	0.601323
chr16	30615256	30615679	423	-	ENSG00000260678.1	transcribed_processed_pseudogene	RP11-146F11.4	OTTHUMG00000176952.1	pseudogene	1	2.36407
chr16	30956872	30957199	327	-	ENSG00000275263.1	lincRNA	RP11-1072A3.4	OTTHUMG00000186886.1	lincRNA	1	3.0581
chr16	31456711	31459736	3025	-	ENSG00000260267.1	antisense	RP11-452L6.5	OTTHUMG00000176617.1	lncRNA	2	0.661157
chr16	50806668	50807629	961	+	ENSG00000261703.1	lincRNA	RP11-327F22.5	OTTHUMG00000173406.1	lincRNA	2	2.08117
chr16	56643705	56644786	1081	+	ENSG00000205361.8	transcribed_unprocessed_pseudogene	MT1DP	OTTHUMG00000158354.2	pseudogene	1	0.925069
chr16	57461055	57462737	1682	+	ENSG00000260345.1	processed_transcript	AC009052.12	OTTHUMG00000176595.1	processed_transcript	1	0.59453
chr16	66579983	66580716	733	-	ENSG00000260650.1	antisense	RP11-403P17.2	OTTHUMG00000175511.1	lncRNA	1	1.36426
chr16	75694434	75696107	1673	-	ENSG00000282757.1	unprocessed_pseudogene	RP11-490B18.8	OTTHUMG00000191434.1	pseudogene	1	0.597729
chr16	88194281	88195217	936	+	ENSG00000260420.2	lincRNA	LA16c-444G7.2	OTTHUMG00000175545.2	lincRNA	1	1.06838
chr17	4731756	4732371	615	-	ENSG00000261898.2	antisense	RP11-314A20.5	OTTHUMG00000177897.2	lncRNA	1	1.62602
chr17	5019214	5020093	879	-	ENSG00000227495.1	antisense	AC109333.10	OTTHUMG00000132924.2	lncRNA	1	1.13766
chr17	7436557	7437523	966	-	ENSG00000262624.1	antisense	RP11-104H15.9	OTTHUMG00000178213.1	lncRNA	1	1.0352
chr17	16427474	16428719	1245	+	ENSG00000239203.1	processed_transcript	AC093484.4	OTTHUMG00000058991.1	processed_transcript	1	0.803213
chr17	20008051	20009234	1183	-	ENSG00000261033.1	antisense	RP11-209D14.2	OTTHUMG00000175977.2	lncRNA	1	0.845309
chr17	21456513	21460215	3702	-	ENSG00000265043.1	lincRNA	RP11-728E14.3	OTTHUMG00000175986.2	lincRNA	2	0.540249
chr17	21457434	21458989	1555	+	ENSG00000264023.1	lincRNA	RP11-728E14.2	OTTHUMG00000179015.1	lincRNA	1	0.643087
chr17	28416922	28417492	570	+	ENSG00000265541.1	unprocessed_pseudogene	H3F3BP2	OTTHUMG00000179306.1	pseudogene	1	1.75439
chr17	28749731	28750079	348	-	ENSG00000265840.1	antisense	AC010761.10	OTTHUMG00000179493.1	lncRNA	1	2.87356
chr17	28848860	28849592	732	+	ENSG00000264138.1	unprocessed_pseudogene	RP11-20B24.3	OTTHUMG00000179496.1	pseudogene	1	1.36612
chr17	29591703	29592241	538	-	ENSG00000264647.1	antisense	RP11-68I3.7	OTTHUMG00000179725.1	lncRNA	1	1.85874
chr17	29639627	29640825	1198	+	ENSG00000263370.1	antisense	RP11-68I3.5	OTTHUMG00000179727.1	lncRNA	1	0.834725
chr17	30971652	30973312	1660	+	ENSG00000264456.1	sense_intronic	RP11-848P1.2	OTTHUMG00000179051.1	lncRNA	1	0.60241
chr17	32111562	32112590	1028	-	ENSG00000265574.1	processed_pseudogene	WDR45BP1	OTTHUMG00000179563.1	pseudogene	1	0.972763
chr17	32141226	32143135	1909	-	ENSG00000214708.4	antisense	AC090616.2	OTTHUMG00000132778.2	lncRNA	1	0.523834
chr17	32876759	32878637	1878	+	ENSG00000226377.1	antisense	AC084809.2	OTTHUMG00000132777.1	lncRNA	1	0.532481
chr17	34080882	34082224	1342	-	ENSG00000263485.1	sense_intronic	CTC-304I17.4	OTTHUMG00000179673.1	lncRNA	1	0.745156
chr17	34176538	34178166	1628	+	ENSG00000264990.1	lincRNA	RP11-215E13.2	OTTHUMG00000179677.1	lincRNA	1	0.614251
chr17	35808489	35808897	408	-	ENSG00000270829.1	lincRNA	AC015849.12	OTTHUMG00000188390.1	lincRNA	1	2.45098
chr17	37649133	37650894	1761	+	ENSG00000274244.1	lincRNA	RP11-697E22.3	OTTHUMG00000188477.1	lincRNA	1	0.567859
chr17	39619613	39622513	2900	+	ENSG00000214546.3	lincRNA	AC087491.2	OTTHUMG00000132690.1	lincRNA	2	0.689655
chr17	39835037	39836080	1043	-	ENSG00000264663.1	processed_pseudogene	KRT8P34	OTTHUMG00000179518.1	pseudogene	1	0.958773
chr17	42679963	42682020	2057	+	ENSG00000267042.1	antisense	CTD-3193K9.4	OTTHUMG00000180642.1	lncRNA	2	0.97229
chr17	44328613	44331462	2849	+	ENSG00000267211.1	lincRNA	RP5-1067M6.3	OTTHUMG00000181815.1	lincRNA	2	0.702001
chr17	46193576	46196723	3147	+	ENSG00000214401.4	antisense	KANSL1-AS1	OTTHUMG00000178028.2	lncRNA	3	0.953289
chr17	47946802	47948275	1473	-	ENSG00000264019.1	antisense	RP11-6N17.6	OTTHUMG00000178296.1	lncRNA	1	0.678887
chr17	50094065	50094647	582	+	ENSG00000276851.1	lincRNA	RP5-875H18.9	OTTHUMG00000186661.1	lincRNA	1	1.71821
chr17	50396438	50397888	1450	+	ENSG00000253102.1	antisense	RP1-117B12.4	OTTHUMG00000162080.3	lncRNA	2	1.37931
chr17	50909637	50910232	595	-	ENSG00000262006.1	lincRNA	RP11-700H6.4	OTTHUMG00000177525.1	lincRNA	1	1.68067
chr17	54754165	54754649	484	-	ENSG00000263125.1	processed_pseudogene	ARL2BPP8	OTTHUMG00000177815.2	pseudogene	1	2.06612
chr17	56939932	56941275	1343	+	ENSG00000262298.1	antisense	RP5-1107A17.3	OTTHUMG00000178127.1	lncRNA	1	0.744602
chr17	60315834	60316215	381	+	ENSG00000271626.1	processed_pseudogene	RP11-3K24.2	OTTHUMG00000184886.1	pseudogene	1	2.62467
chr17	61411751	61413280	1529	+	ENSG00000187013.4	lincRNA	C17orf82	OTTHUMG00000180077.1	lincRNA	1	0.654022
chr17	62966817	62968549	1732	-	ENSG00000266411.1	lincRNA	RP11-180P8.3	OTTHUMG00000179102.1	lincRNA	1	0.577367
chr17	67276118	67276351	233	-	ENSG00000264093.1	processed_pseudogene	RP11-401F2.2	OTTHUMG00000179557.1	pseudogene	1	4.29185
chr17	74209980	74213342	3362	-	ENSG00000246731.2	antisense	MGC16275	OTTHUMG00000166017.1	lncRNA	2	0.594884
chr17	75679474	75679967	493	-	ENSG00000264829.1	antisense	RP11-474I11.8	OTTHUMG00000179799.1	lncRNA	1	2.0284
chr17	76671942	76673658	1716	+	ENSG00000261335.1	antisense	RP11-318A15.2	OTTHUMG00000176088.1	lncRNA	1	0.582751
chr17	79800598	79802529	1931	+	ENSG00000262768.2	antisense	RP11-353N14.1	OTTHUMG00000177464.2	lncRNA	1	0.517866
chr17	79991944	79992841	897	-	ENSG00000262172.1	sense_intronic	CTD-2529O21.1	OTTHUMG00000177535.1	lncRNA	1	1.11483
chr17	81023545	81025503	1958	-	ENSG00000262098.1	lincRNA	CTD-2561B21.10	OTTHUMG00000177696.1	lincRNA	1	0.510725
chr17	81339183	81339691	508	-	ENSG00000275542.1	lincRNA	RP11-455O6.9	OTTHUMG00000186720.1	lincRNA	1	1.9685
chr17	81345476	81345966	490	-	ENSG00000275966.1	lincRNA	RP11-1055B8.9	OTTHUMG00000186721.1	lincRNA	1	2.04082
chr17	81480523	81481570	1047	-	ENSG00000278200.1	lincRNA	RP13-766D20.4	OTTHUMG00000186760.1	lincRNA	1	0.95511
chr17	82153430	82154815	1385	+	ENSG00000265678.1	antisense	RP11-1376P16.2	OTTHUMG00000178560.1	lncRNA	1	0.722022
chr18	3246401	3247086	685	-	ENSG00000272688.1	lincRNA	RP13-270P17.3	OTTHUMG00000186210.1	lincRNA	1	1.45985
chr18	3653410	3656282	2872	+	ENSG00000266401.1	antisense	RP11-874J12.4	OTTHUMG00000178410.1	lncRNA	2	0.696379
chr18	6728821	6729862	1041	-	ENSG00000266441.1	antisense	RP11-91I8.3	OTTHUMG00000178470.1	lncRNA	1	0.960615
chr18	12056676	12057822	1146	-	ENSG00000212712.2	processed_pseudogene	AP002414.1	OTTHUMG00000073721.2	pseudogene	1	0.8726
chr18	12091674	12093141	1467	-	ENSG00000267478.1	processed_pseudogene	RP11-815J4.5	OTTHUMG00000180684.1	pseudogene	1	0.681663
chr18	14074912	14075741	829	-	ENSG00000267756.1	unprocessed_pseudogene	RP11-411B10.4	OTTHUMG00000182056.1	pseudogene	1	1.20627
chr18	24402153	24402714	561	+	ENSG00000273321.1	lincRNA	RP11-621L6.3	OTTHUMG00000186241.1	lincRNA	1	1.78253
chr18	44320800	44322257	1457	-	ENSG00000267573.1	processed_pseudogene	KRT8P5	OTTHUMG00000178346.1	pseudogene	1	0.686342
chr18	58398663	58400082	1419	-	ENSG00000267396.1	antisense	RP11-845C23.3	OTTHUMG00000179965.1	lncRNA	1	0.704722
chr18	61957273	61958014	741	-	ENSG00000267597.1	processed_pseudogene	RPIAP1	OTTHUMG00000180097.1	pseudogene	1	1.34953
chr18	76256891	76258337	1446	+	ENSG00000264212.1	lincRNA	RP11-94B19.3	OTTHUMG00000179136.1	lincRNA	1	0.691563
chr18	76805151	76805736	585	-	ENSG00000278107.1	lincRNA	RP11-162A12.4	OTTHUMG00000186681.1	lincRNA	1	1.7094
chr19	999796	1002757	2961	-	ENSG00000266990.1	antisense	LLNLR-284B4.2	OTTHUMG00000189099.1	lncRNA	2	0.675447
chr19	1852382	1853622	1240	+	ENSG00000267125.2	antisense	CTB-31O20.6	OTTHUMG00000179993.2	lncRNA	1	0.806452
chr19	2610155	2611862	1707	-	ENSG00000267412.1	sense_intronic	CTC-265F19.2	OTTHUMG00000180437.1	lncRNA	1	0.585823
chr19	6562123	6563848	1725	-	ENSG00000269546.1	processed_pseudogene	CLIC4P2	OTTHUMG00000181833.1	pseudogene	1	0.57971
chr19	6716386	6717742	1356	-	ENSG00000276980.1	sense_intronic	CTD-3128G10.7	OTTHUMG00000186561.1	lncRNA	1	0.737463
chr19	8581160	8582715	1555	+	ENSG00000267986.1	antisense	AC130469.2	OTTHUMG00000182429.1	lncRNA	1	0.643087
chr19	10259109	10260045	936	-	ENSG00000267105.1	antisense	CTD-2369P2.4	OTTHUMG00000180402.1	lncRNA	1	1.06838
chr19	13069792	13071374	1582	-	ENSG00000267610.2	antisense	AC007787.2	OTTHUMG00000180728.2	lncRNA	1	0.632111
chr19	13796574	13796933	359	-	ENSG00000267582.1	antisense	CTD-3252C9.2	OTTHUMG00000181753.1	lncRNA	1	2.78552
chr19	16051929	16052689	760	+	ENSG00000267450.1	processed_pseudogene	OR1AB1P	OTTHUMG00000182236.1	pseudogene	2	2.63158
chr19	17296196	17296695	499	-	ENSG00000269815.1	sense_intronic	CTD-2278I10.4	OTTHUMG00000182664.1	lncRNA	1	2.00401
chr19	36378028	36378832	804	+	ENSG00000266973.1	antisense	CTD-3162L10.3	OTTHUMG00000180676.1	lncRNA	1	1.24378
chr19	47863483	47865341	1858	-	ENSG00000259108.2	lincRNA	LINC01595	OTTHUMG00000170611.2	lincRNA	1	0.538213
chr19	50486810	50487638	828	-	ENSG00000268518.1	lincRNA	CTD-2545M3.8	OTTHUMG00000183047.1	lincRNA	1	1.20773
chr19	53512092	53512616	524	-	ENSG00000274892.1	unprocessed_pseudogene	CTB-167G5.7	OTTHUMG00000188032.1	pseudogene	1	1.9084
chr19	53772506	53773280	774	-	ENSG00000229000.1	processed_pseudogene	SEPT7P8	OTTHUMG00000060777.1	pseudogene	1	1.29199
chr19	54031412	54031504	92	+	ENSG00000276206.1	unprocessed_pseudogene	CTD-3093M3.1	OTTHUMG00000188518.1	pseudogene	1	10.8696
chr19	54438665	54439544	879	-	ENSG00000267838.2	lincRNA	AC008746.12	OTTHUMG00000150514.2	lincRNA	1	1.13766
chr19	55338945	55339283	338	-	ENSG00000276831.1	lincRNA	CTD-2105E13.16	OTTHUMG00000186783.1	lincRNA	1	2.95858
chr19	55670632	55672069	1437	+	ENSG00000267096.1	sense_intronic	CTD-2537I9.13	OTTHUMG00000180910.1	lncRNA	1	0.695894
chr19	55777553	55778900	1347	+	ENSG00000255238.1	processed_pseudogene	RFPL4AP1	OTTHUMG00000165451.1	pseudogene	1	0.74239
chr20	267186	268857	1671	+	ENSG00000272874.1	lincRNA	RP5-1103G7.10	OTTHUMG00000186509.1	lincRNA	1	0.598444
chr20	2780614	2781041	427	+	ENSG00000226217.1	processed_pseudogene	RPL19P1	OTTHUMG00000031708.1	pseudogene	1	2.34192
chr20	3888239	3888868	629	-	ENSG00000229539.1	antisense	RP11-119B16.2	OTTHUMG00000031766.1	lncRNA	1	1.58983
chr20	21530202	21530744	542	+	ENSG00000233492.1	lincRNA	RP5-984P4.4	OTTHUMG00000032029.1	lincRNA	1	1.84502
chr20	31547504	31548049	545	+	ENSG00000101898.5	processed_pseudogene	MCTS2P	OTTHUMG00000032177.1	pseudogene	1	1.83486
chr20	31563166	31564076	910	+	ENSG00000235313.1	sense_intronic	HM13-IT1	OTTHUMG00000046194.1	lncRNA	1	1.0989
chr20	31721507	31723409	1902	+	ENSG00000281376.1	antisense	ABALON	OTTHUMG00000189574.1	lncRNA	1	0.525762
chr20	33752167	33752543	376	-	ENSG00000230837.1	processed_pseudogene	RPL31P2	OTTHUMG00000032276.1	pseudogene	1	2.65957
chr20	34833575	34834462	887	-	ENSG00000225336.2	processed_pseudogene	HMGB3P1	OTTHUMG00000032313.1	pseudogene	1	1.1274
chr20	37095785	37097178	1393	+	ENSG00000269846.1	antisense	RP4-621N11.2	OTTHUMG00000187317.1	lncRNA	2	1.43575
chr20	38962472	38962993	521	+	ENSG00000277581.1	sense_intronic	RP4-616B8.6	OTTHUMG00000186879.1	lncRNA	1	1.91939
chr20	44448777	44450092	1315	-	ENSG00000237907.1	antisense	LINC01430	OTTHUMG00000032534.2	lncRNA	1	0.760456
chr20	45229817	45230191	374	+	ENSG00000233352.1	unprocessed_pseudogene	RP1-300I2.3	OTTHUMG00000154638.1	pseudogene	1	2.6738
chr20	46681676	46682375	699	-	ENSG00000273893.1	sense_intronic	RP1-101A2.1	OTTHUMG00000186929.1	lncRNA	1	1.43062
chr20	59515191	59516039	848	+	ENSG00000227282.1	lincRNA	RP11-164D18.2	OTTHUMG00000137386.1	lincRNA	1	1.17925
chr20	62477870	62478594	724	+	ENSG00000272050.1	lincRNA	RP13-379O24.3	OTTHUMG00000185378.1	lincRNA	2	2.76243
chr20	64278306	64278561	255	+	ENSG00000278171.1	processed_pseudogene	RP11-476I15.5	OTTHUMG00000187990.1	pseudogene	1	3.92157
chr21	32393130	32393960	830	+	ENSG00000256073.3	lincRNA	URB1-AS1	OTTHUMG00000064921.2	lincRNA	1	1.20482
chr21	36168970	36170180	1210	-	ENSG00000228149.1	processed_pseudogene	RPL3P1	OTTHUMG00000086610.1	pseudogene	1	0.826446
chr22	17213516	17214155	639	+	ENSG00000203416.3	processed_pseudogene	FAM32B	OTTHUMG00000150068.2	pseudogene	1	1.56495
chr22	20110821	20111875	1054	-	ENSG00000243762.1	antisense	AC006547.8	OTTHUMG00000150489.2	lncRNA	1	0.948767
chr22	22103219	22104857	1638	+	ENSG00000225741.1	unprocessed_pseudogene	LL22NC03-88E1.17	OTTHUMG00000150843.1	pseudogene	1	0.610501
chr22	22347807	22348164	357	+	ENSG00000232515.1	unprocessed_pseudogene	LL22NC03-75A1.9	OTTHUMG00000151039.2	pseudogene	1	2.80112
chr22	22692778	22693312	534	-	ENSG00000223999.1	lincRNA	LL22NC03-102D1.18	OTTHUMG00000151209.1	lincRNA	1	1.87266
chr22	25048967	25051966	2999	-	ENSG00000279006.1	antisense	CTA-243E7.2	OTTHUMG00000189170.1	lncRNA	2	0.666889
chr22	26644889	26645336	447	-	ENSG00000226912.1	processed_pseudogene	ISCA2P1	OTTHUMG00000150978.1	pseudogene	1	2.23714
chr22	29608900	29609501	601	+	ENSG00000233010.1	processed_pseudogene	RPEP4	OTTHUMG00000155625.1	pseudogene	1	1.66389
chr22	31082156	31083565	1409	-	ENSG00000273387.1	antisense	RP3-412A9.16	OTTHUMG00000186126.1	lncRNA	1	0.709723
chr22	44566965	44568247	1282	+	ENSG00000215333.3	processed_pseudogene	KRT18P23	OTTHUMG00000150459.1	pseudogene	1	0.780031
chr22	46013606	46015498	1892	+	ENSG00000273145.1	lincRNA	CITF22-92A6.1	OTTHUMG00000170172.1	lincRNA	1	0.528541
chrX	8783514	8784461	947	-	ENSG00000225574.1	processed_pseudogene	DRAXINP1	OTTHUMG00000021108.2	pseudogene	1	1.05597
chrX	15117437	15117768	331	-	ENSG00000236929.2	processed_pseudogene	RP11-699A7.1	OTTHUMG00000021171.2	pseudogene	1	3.02115
chrX	28659065	28659469	404	-	ENSG00000226436.1	processed_pseudogene	RP1-22N22.1	OTTHUMG00000021314.1	pseudogene	1	2.47525
chrX	30821815	30823407	1592	-	ENSG00000277876.1	unprocessed_pseudogene	RP11-467P22.5	OTTHUMG00000188011.2	pseudogene	1	0.628141
chrX	41275739	41276778	1039	+	ENSG00000223714.1	lincRNA	RP5-1172N10.2	OTTHUMG00000021366.1	lincRNA	1	0.962464
chrX	45632292	45633733	1441	-	ENSG00000214282.3	processed_pseudogene	KRT8P14	OTTHUMG00000021407.2	pseudogene	1	0.693963
chrX	46646594	46647330	736	-	ENSG00000213997.3	processed_pseudogene	PGAM1P7	OTTHUMG00000039871.1	pseudogene	1	1.3587
chrX	47204921	47205865	944	+	ENSG00000224975.1	sense_intronic	INE1	OTTHUMG00000046428.1	lncRNA	1	1.05932
chrX	49876724	49879241	2517	-	ENSG00000234390.4	lincRNA	USP27X-AS1	OTTHUMG00000024154.2	lincRNA	2	0.794597
chrX	50905438	50905866	428	+	ENSG00000226881.5	processed_pseudogene	H3F3AP5	OTTHUMG00000021523.1	pseudogene	2	4.6729
chrX	70452958	70455994	3036	-	ENSG00000231651.1	antisense	DLG3-AS1	OTTHUMG00000021777.1	lncRNA	2	0.658762
chrX	104803915	104804440	525	+	ENSG00000223733.1	processed_pseudogene	RPL18AP14	OTTHUMG00000022128.1	pseudogene	1	1.90476
chrX	107428630	107429461	831	+	ENSG00000214720.4	processed_pseudogene	KRT18P49	OTTHUMG00000022163.2	pseudogene	2	2.40674
chrX	130330857	130331069	212	+	ENSG00000225046.2	processed_pseudogene	RP1-20I3.3	OTTHUMG00000022396.2	pseudogene	1	4.71698
chrX	131803312	131803741	429	-	ENSG00000228089.1	processed_pseudogene	PNKDP1	OTTHUMG00000022418.1	pseudogene	1	2.331
chrX	154396878	154398816	1938	-	ENSG00000280195.1	antisense	XX-FW83563B9.5	OTTHUMG00000057501.1	lncRNA	1	0.515996

## Sheet: IMR90
chromosome	start	end	width	strand	gene id	gene type	gene name	havana gene	biotype	CTCF count	CTCF density
chr1	2546465	2547460	995	+	ENSG00000272449.1	lincRNA	RP3-395M20.12	OTTHUMG00000185639.1	lincRNA	1	1.00503
chr1	3785008	3785538	530	+	ENSG00000272153.1	antisense	RP1-286D6.5	OTTHUMG00000185643.1	lncRNA	1	1.88679
chr1	6204840	6205780	940	-	ENSG00000226944.1	antisense	RP1-120G22.11	OTTHUMG00000041452.1	lncRNA	1	1.06383
chr1	6393555	6394391	836	+	ENSG00000271746.1	antisense	RP1-202O8.3	OTTHUMG00000185645.1	lncRNA	1	1.19617
chr1	7942372	7942726	354	+	ENSG00000270330.1	processed_pseudogene	RP5-892F13.2	OTTHUMG00000184257.1	pseudogene	1	2.82486
chr1	9182007	9183750	1743	-	ENSG00000228526.3	lincRNA	RP3-510D11.1	OTTHUMG00000001762.2	lincRNA	1	0.573723
chr1	9197143	9198906	1763	-	ENSG00000281937.1	lincRNA	RP3-510D11.4	OTTHUMG00000191469.1	lincRNA	1	0.567215
chr1	10429881	10430677	796	-	ENSG00000271989.1	antisense	RP4-736L20.3	OTTHUMG00000185648.1	lncRNA	1	1.25628
chr1	20732880	20733952	1072	+	ENSG00000233069.1	antisense	RP5-930J4.2	OTTHUMG00000002621.1	lncRNA	1	0.932836
chr1	23949016	23949383	367	-	ENSG00000230228.2	processed_pseudogene	RP11-4M23.4	OTTHUMG00000013896.2	pseudogene	1	2.7248
chr1	25247837	25248321	484	+	ENSG00000272432.1	lincRNA	RP3-465N24.6	OTTHUMG00000185697.1	lincRNA	1	2.06612
chr1	26692132	26694131	1999	-	ENSG00000260063.1	antisense	RP5-968P14.2	OTTHUMG00000175777.1	lncRNA	2	1.0005
chr1	40690380	40692066	1686	-	ENSG00000272145.1	antisense	NFYC-AS1	OTTHUMG00000185712.1	lncRNA	1	0.59312
chr1	45303910	45305619	1709	+	ENSG00000281912.1	lincRNA	LINC01144	OTTHUMG00000189536.1	lincRNA	1	0.585138
chr1	47179250	47180339	1089	+	ENSG00000224805.2	antisense	LINC00853	OTTHUMG00000007850.2	lncRNA	1	0.918274
chr1	53291791	53292138	347	-	ENSG00000225030.1	sense_intronic	RP4-784A16.3	OTTHUMG00000008933.1	lncRNA	1	2.88184
chr1	62530636	62530873	237	+	ENSG00000270549.1	processed_pseudogene	RP11-293K19.1	OTTHUMG00000184290.1	pseudogene	1	4.21941
chr1	74468195	74469543	1348	+	ENSG00000233894.1	antisense	RP4-650F12.2	OTTHUMG00000009610.1	lncRNA	1	0.74184
chr1	86703502	86704462	960	-	ENSG00000261737.1	antisense	RP4-612B15.3	OTTHUMG00000175864.1	lncRNA	1	1.04167
chr1	92749175	92749330	155	-	ENSG00000234202.2	processed_pseudogene	RP11-330C7.4	OTTHUMG00000010893.2	pseudogene	1	6.45161
chr1	108199926	108201491	1565	+	ENSG00000260879.1	antisense	RP11-483I13.5	OTTHUMG00000175898.1	lncRNA	1	0.638978
chr1	110848077	110848941	864	-	ENSG00000237415.2	processed_pseudogene	NRBF2P3	OTTHUMG00000034490.2	pseudogene	1	1.15741
chr1	110963302	110964649	1347	+	ENSG00000273010.1	antisense	RP11-96K19.5	OTTHUMG00000186361.1	lncRNA	1	0.74239
chr1	119886304	119886927	623	+	ENSG00000226446.1	processed_pseudogene	NOTCH2P1	OTTHUMG00000057603.1	pseudogene	1	1.60514
chr1	147840962	147842359	1397	+	ENSG00000223728.3	processed_pseudogene	RP11-314N2.2	OTTHUMG00000037548.2	pseudogene	1	0.71582
chr1	150255095	150257286	2191	-	ENSG00000276110.1	antisense	RP4-790G17.7	OTTHUMG00000185690.2	lncRNA	2	0.912825
chr1	151280024	151281929	1905	-	ENSG00000232671.5	antisense	RP11-126K1.2	OTTHUMG00000012346.6	lncRNA	1	0.524934
chr1	151340648	151341966	1318	+	ENSG00000224645.1	antisense	RP11-126K1.8	OTTHUMG00000073673.1	lncRNA	1	0.758725
chr1	154480012	154481501	1489	+	ENSG00000273110.1	antisense	RP11-350G8.9	OTTHUMG00000186422.1	lncRNA	1	0.671592
chr1	154937370	154938059	689	+	ENSG00000270361.1	lincRNA	RP11-307C12.13	OTTHUMG00000185167.1	lincRNA	1	1.45138
chr1	154961825	154962623	798	+	ENSG00000271380.1	antisense	RP11-307C12.12	OTTHUMG00000185142.1	lncRNA	1	1.25313
chr1	155045191	155046118	927	-	ENSG00000232093.1	antisense	RP11-307C12.11	OTTHUMG00000041316.1	lncRNA	1	1.07875
chr1	156687695	156691997	4302	-	ENSG00000237588.2	lincRNA	RP11-66D17.3	OTTHUMG00000041297.2	lincRNA	3	0.69735
chr1	157073257	157074703	1446	+	ENSG00000224520.2	processed_pseudogene	KRT8P45	OTTHUMG00000041329.2	pseudogene	1	0.691563
chr1	160261744	160262778	1034	+	ENSG00000228606.1	antisense	RP11-574F21.2	OTTHUMG00000033109.1	lncRNA	1	0.967118
chr1	160776975	160780140	3165	-	ENSG00000274562.1	unprocessed_pseudogene	RP11-404F10.5	OTTHUMG00000187540.1	pseudogene	2	0.631912
chr1	169486076	169486986	910	+	ENSG00000213062.4	lincRNA	RP1-206D15.6	OTTHUMG00000186558.1	lincRNA	1	1.0989
chr1	178091508	178093984	2476	-	ENSG00000224687.1	lincRNA	RASAL2-AS1	OTTHUMG00000040865.1	lincRNA	2	0.807754
chr1	179137764	179137934	170	+	ENSG00000234041.1	processed_pseudogene	RP11-345I18.1	OTTHUMG00000041095.1	pseudogene	1	5.88235
chr1	179447578	179448440	862	-	ENSG00000224620.2	processed_pseudogene	MEF2AP1	OTTHUMG00000035267.2	pseudogene	1	1.16009
chr1	179953184	179954440	1256	-	ENSG00000260360.1	lincRNA	RP11-533E19.5	OTTHUMG00000176152.1	lincRNA	1	0.796178
chr1	201222113	201223123	1010	-	ENSG00000229821.1	antisense	RP11-567E21.3	OTTHUMG00000040658.1	lncRNA	1	0.990099
chr1	204131062	204131966	904	+	ENSG00000261065.1	antisense	RP11-74C13.4	OTTHUMG00000036063.1	lncRNA	1	1.10619
chr1	206634649	206635622	973	-	ENSG00000237605.1	antisense	RP11-343H5.6	OTTHUMG00000036345.1	lncRNA	2	2.0555
chr1	206907619	206908229	610	+	ENSG00000226945.1	processed_pseudogene	RP11-564A8.4	OTTHUMG00000036458.1	pseudogene	1	1.63934
chr1	212557833	212559731	1898	-	ENSG00000260805.2	lincRNA	RP11-61J19.5	OTTHUMG00000186548.2	lincRNA	1	0.52687
chr1	222452738	222454705	1967	-	ENSG00000226643.2	lincRNA	RP11-358H9.1	OTTHUMG00000037291.2	lincRNA	1	0.508388
chr1	226331999	226333655	1656	-	ENSG00000275406.1	unprocessed_pseudogene	RP11-125A15.3	OTTHUMG00000187548.1	pseudogene	1	0.603865
chr1	227234269	227235355	1086	+	ENSG00000228729.1	processed_pseudogene	RP11-211A18.2	OTTHUMG00000037614.1	pseudogene	1	0.92081
chr1	229270927	229271599	672	-	ENSG00000240524.2	transcribed_processed_pseudogene	RP5-1061H20.3	OTTHUMG00000037659.2	pseudogene	1	1.4881
chr1	229440284	229441020	736	-	ENSG00000226920.1	3prime_overlapping_ncrna	RP5-1068B5.5	OTTHUMG00000189502.1	lncRNA	1	1.3587
chr1	235104180	235104609	429	-	ENSG00000273416.1	lincRNA	RP4-597N16.4	OTTHUMG00000185835.1	lincRNA	1	2.331
chr1	236523052	236524508	1456	-	ENSG00000223776.5	antisense	LGALS8-AS1	OTTHUMG00000039952.2	lncRNA	1	0.686813
chr1	239898016	239899872	1856	-	ENSG00000234601.1	antisense	CHRM3-AS1	OTTHUMG00000039650.1	lncRNA	1	0.538793
chr1	244969350	244971088	1738	-	ENSG00000272195.1	antisense	RP11-156E8.1	OTTHUMG00000185820.1	lncRNA	1	0.575374
chr1	247936061	247937513	1452	-	ENSG00000226191.3	processed_pseudogene	CLK3P2	OTTHUMG00000040208.2	pseudogene	1	0.688705
chr2	7671604	7672246	642	-	ENSG00000230515.1	lincRNA	AC092580.3	OTTHUMG00000151592.1	lincRNA	1	1.55763
chr2	11681460	11683328	1868	+	ENSG00000228496.1	sense_intronic	AC106875.1	OTTHUMG00000151822.1	lncRNA	1	0.535332
chr2	12715415	12716227	812	+	ENSG00000261117.1	lincRNA	RP11-333O1.1	OTTHUMG00000175731.1	lincRNA	1	1.23153
chr2	20451042	20452947	1905	+	ENSG00000228950.1	lincRNA	AC023137.2	OTTHUMG00000151780.1	lincRNA	1	0.524934
chr2	28396815	28397110	295	+	ENSG00000270640.1	sense_intronic	RP11-373D23.2	OTTHUMG00000185291.1	lncRNA	1	3.38983
chr2	38535258	38536249	991	-	ENSG00000271443.1	transcribed_processed_pseudogene	RP11-541E12.1	OTTHUMG00000184445.1	pseudogene	1	1.00908
chr2	38959287	38960342	1055	-	ENSG00000269210.2	antisense	RP11-173C1.1	OTTHUMG00000187088.1	lncRNA	1	0.947867
chr2	43227210	43228855	1645	+	ENSG00000279873.2	lincRNA	LINC01126	OTTHUMG00000152397.3	lincRNA	1	0.607903
chr2	48440043	48440597	554	-	ENSG00000272663.1	lincRNA	RP11-191L17.1	OTTHUMG00000185920.2	lincRNA	1	1.80505
chr2	55617909	55618373	464	+	ENSG00000272606.1	antisense	RP11-554J4.1	OTTHUMG00000185926.1	lncRNA	1	2.15517
chr2	64330486	64332131	1645	-	ENSG00000238012.1	lincRNA	AC114752.1	OTTHUMG00000152671.1	lincRNA	1	0.607903
chr2	64522187	64524093	1906	-	ENSG00000260101.1	lincRNA	RP11-568N6.1	OTTHUMG00000175896.1	lincRNA	1	0.524659
chr2	70301451	70302072	621	+	ENSG00000233849.1	antisense	AC022201.5	OTTHUMG00000154180.1	lncRNA	3	4.83092
chr2	74148009	74150061	2052	+	ENSG00000225439.2	antisense	BOLA3-AS1	OTTHUMG00000152835.2	lncRNA	1	0.487329
chr2	85186409	85187253	844	+	ENSG00000231134.1	sense_intronic	TCF7L1-IT1	OTTHUMG00000153211.1	lncRNA	1	1.18483
chr2	85889280	85890980	1700	+	ENSG00000232504.4	lincRNA	ST3GAL5-AS1	OTTHUMG00000153169.4	lincRNA	1	0.588235
chr2	95413456	95414296	840	-	ENSG00000248821.1	unprocessed_pseudogene	AC009238.6	OTTHUMG00000155175.1	pseudogene	1	1.19048
chr2	95525109	95526702	1593	-	ENSG00000272913.1	lincRNA	RP11-440D17.3	OTTHUMG00000186024.1	lincRNA	1	0.627746
chr2	104412227	104414008	1781	-	ENSG00000225765.1	lincRNA	AC068535.3	OTTHUMG00000153049.1	lincRNA	1	0.561482
chr2	106543014	106544297	1283	+	ENSG00000232001.1	lincRNA	AC108868.6	OTTHUMG00000153180.1	lincRNA	1	0.779423
chr2	109127327	109128930	1603	-	ENSG00000259863.1	lincRNA	SH3RF3-AS1	OTTHUMG00000153437.1	lincRNA	1	0.62383
chr2	111887914	111888741	827	+	ENSG00000236307.2	processed_pseudogene	EEF1E1P1	OTTHUMG00000153261.2	pseudogene	1	1.20919
chr2	121530422	121532705	2283	+	ENSG00000265451.1	antisense	RP11-204L24.2	OTTHUMG00000179705.1	lncRNA	2	0.87604
chr2	127024252	127025723	1471	-	ENSG00000260634.1	lincRNA	RP11-521O16.1	OTTHUMG00000176160.1	lincRNA	2	1.35962
chr2	169767185	169768799	1614	-	ENSG00000231550.1	processed_pseudogene	PTCHD3P2	OTTHUMG00000154119.1	pseudogene	1	0.619579
chr2	169790093	169790885	792	+	ENSG00000214369.2	processed_pseudogene	AC009967.3	OTTHUMG00000153985.1	pseudogene	1	1.26263
chr2	171491422	171491931	509	+	ENSG00000228507.1	processed_pseudogene	DAP3P2	OTTHUMG00000154084.1	pseudogene	1	1.96464
chr2	172427774	172428603	829	-	ENSG00000226963.1	antisense	AC078883.4	OTTHUMG00000154231.1	lncRNA	1	1.20627
chr2	172464262	172466022	1760	-	ENSG00000232788.1	antisense	AC078883.3	OTTHUMG00000154089.1	lncRNA	1	0.568182
chr2	172674212	172674898	686	-	ENSG00000230104.1	processed_pseudogene	AC018712.2	OTTHUMG00000154093.1	pseudogene	1	1.45773
chr2	177264359	177265515	1156	+	ENSG00000222043.2	antisense	AC079305.10	OTTHUMG00000154178.1	lncRNA	2	1.7301
chr2	183071040	183072486	1446	-	ENSG00000231203.1	processed_pseudogene	KRT8P10	OTTHUMG00000154237.2	pseudogene	1	0.691563
chr2	189762704	189765556	2852	+	ENSG00000253559.1	antisense	OSGEPL1-AS1	OTTHUMG00000164097.1	lncRNA	2	0.701262
chr2	189763859	189764456	597	-	ENSG00000273240.1	antisense	RP11-455J20.3	OTTHUMG00000186272.1	lncRNA	1	1.67504
chr2	206084605	206086564	1959	+	ENSG00000227946.1	lincRNA	AC007383.3	OTTHUMG00000154653.1	lincRNA	2	1.02093
chr2	208255247	208256181	934	+	ENSG00000231908.1	antisense	IDH1-AS1	OTTHUMG00000154707.1	lncRNA	1	1.07066
chr2	208269343	208269957	614	-	ENSG00000228380.1	processed_pseudogene	MYL6BP1	OTTHUMG00000154704.1	pseudogene	1	1.62866
chr2	208466238	208466626	388	-	ENSG00000227430.1	processed_pseudogene	AC019185.2	OTTHUMG00000154661.1	pseudogene	1	2.57732
chr2	221572506	221574454	1948	+	ENSG00000272944.1	antisense	CTD-2308L22.1	OTTHUMG00000186317.1	lncRNA	2	1.02669
chr2	222317242	222318653	1411	-	ENSG00000267034.1	lincRNA	RP11-384O8.1	OTTHUMG00000180633.1	lincRNA	1	0.708717
chr2	231452195	231453153	958	+	ENSG00000233538.1	lincRNA	AC017104.2	OTTHUMG00000153867.1	lincRNA	1	1.04384
chr2	241724615	241725693	1078	-	ENSG00000235351.1	antisense	AC114730.11	OTTHUMG00000151506.1	lncRNA	1	0.927644
chr2	241734715	241735498	783	-	ENSG00000215692.2	antisense	AC114730.8	OTTHUMG00000151478.1	lncRNA	1	1.27714
chr2	241844380	241845036	656	+	ENSG00000235151.1	lincRNA	AC114730.2	OTTHUMG00000151392.1	lincRNA	1	1.52439
chr3	12787393	12788671	1278	-	ENSG00000213943.3	processed_pseudogene	KRT18P17	OTTHUMG00000155395.1	pseudogene	1	0.782473
chr3	25441164	25441502	338	-	ENSG00000229421.1	processed_pseudogene	AC133141.1	OTTHUMG00000155597.2	pseudogene	1	2.95858
chr3	26712307	26713364	1057	+	ENSG00000234165.1	lincRNA	AC114877.3	OTTHUMG00000155686.1	lincRNA	1	0.946074
chr3	49029316	49029706	390	+	ENSG00000272434.1	antisense	RP13-131K19.6	OTTHUMG00000185526.1	lncRNA	1	2.5641
chr3	52239258	52241097	1839	+	ENSG00000243224.1	antisense	RP5-1157M23.2	OTTHUMG00000158107.1	lncRNA	1	0.543774
chr3	70753854	70754573	719	+	ENSG00000243873.1	processed_pseudogene	HMGB1P36	OTTHUMG00000158798.1	pseudogene	1	1.39082
chr3	131526447	131527179	732	+	ENSG00000248530.1	processed_pseudogene	BCL2L12P1	OTTHUMG00000159630.2	pseudogene	1	1.36612
chr3	140972744	140973255	511	+	ENSG00000248773.1	sense_intronic	RP11-231L11.3	OTTHUMG00000160261.1	lncRNA	1	1.95695
chr3	146589602	146590325	723	+	ENSG00000241457.1	antisense	PLSCR5-AS1	OTTHUMG00000159436.1	lncRNA	1	1.38313
chr3	150238519	150240209	1690	+	ENSG00000244541.5	lincRNA	LINC01213	OTTHUMG00000159737.1	lincRNA	1	0.591716
chr3	179649494	179650200	706	-	ENSG00000243977.1	processed_pseudogene	RP11-473P24.2	OTTHUMG00000157785.1	pseudogene	1	1.41643
chr3	196631498	196632587	1089	-	ENSG00000232065.1	antisense	LINC01063	OTTHUMG00000155570.1	lncRNA	1	0.918274
chr4	26859806	26860599	793	-	ENSG00000240005.5	antisense	RP11-293A21.1	OTTHUMG00000159680.2	lncRNA	1	1.26103
chr4	39133913	39135608	1695	+	ENSG00000249685.1	lincRNA	RP11-360F5.3	OTTHUMG00000160465.1	lincRNA	1	0.589971
chr4	76756960	76758474	1514	-	ENSG00000233860.1	antisense	RP11-359D14.2	OTTHUMG00000157074.3	lncRNA	1	0.660502
chr4	101347780	101348883	1103	+	ENSG00000254531.1	lincRNA	FLJ20021	OTTHUMG00000166283.1	lincRNA	1	0.906618
chr4	126106139	126106923	784	-	ENSG00000251005.1	processed_pseudogene	RP11-318I4.2	OTTHUMG00000161148.1	pseudogene	1	1.27551
chr4	128069014	128069612	598	-	ENSG00000241651.4	processed_pseudogene	RP11-214O14.1	OTTHUMG00000157552.2	pseudogene	1	1.67224
chr4	128552590	128553416	826	-	ENSG00000273077.1	lincRNA	RP11-130C6.1	OTTHUMG00000186365.1	lincRNA	2	2.42131
chr4	146241806	146243669	1863	+	ENSG00000251010.1	antisense	RP11-6L6.7	OTTHUMG00000162030.1	lncRNA	2	1.07354
chr4	151407551	151408835	1284	-	ENSG00000251611.1	lincRNA	RP11-610P16.1	OTTHUMG00000161670.1	lincRNA	1	0.778816
chr4	157204462	157204855	393	-	ENSG00000249819.1	processed_pseudogene	RP11-392C20.1	OTTHUMG00000161953.1	pseudogene	1	2.54453
chr4	165016887	165017433	546	+	ENSG00000276623.1	processed_pseudogene	RP11-366M4.19	OTTHUMG00000187585.1	pseudogene	1	1.8315
chr4	185471516	185472263	747	+	ENSG00000249679.1	antisense	RP11-279O9.4	OTTHUMG00000160454.1	lncRNA	1	1.33869
chr5	195778	196341	563	+	ENSG00000261434.1	sense_overlapping	CTD-2083E4.7	OTTHUMG00000175446.1	lncRNA	1	1.7762
chr5	10627260	10628225	965	-	ENSG00000250106.1	antisense	ANKRD33B-AS1	OTTHUMG00000162124.1	lncRNA	1	1.03627
chr5	33997044	33997724	680	-	ENSG00000250767.1	processed_pseudogene	RP11-1084J3.3	OTTHUMG00000162528.1	pseudogene	1	1.47059
chr5	34656412	34657250	838	-	ENSG00000250234.1	antisense	CTD-2024P10.1	OTTHUMG00000162022.1	lncRNA	1	1.19332
chr5	35938822	35939993	1171	+	ENSG00000249748.1	antisense	RP11-79C6.3	OTTHUMG00000162092.1	lncRNA	1	0.853971
chr5	71475761	71476316	555	-	ENSG00000253536.1	processed_pseudogene	RP11-1174L13.2	OTTHUMG00000163655.1	pseudogene	1	1.8018
chr5	73451498	73453395	1897	+	ENSG00000251604.1	lincRNA	LINC01385	OTTHUMG00000162491.1	lincRNA	1	0.527148
chr5	78222184	78222517	333	+	ENSG00000249372.1	processed_pseudogene	ATP6V1G1P6	OTTHUMG00000162480.1	pseudogene	1	3.003
chr5	95834424	95835046	622	-	ENSG00000251000.1	processed_pseudogene	AC008592.3	OTTHUMG00000162736.1	pseudogene	1	1.60772
chr5	98769618	98773469	3851	-	ENSG00000246763.6	antisense	RGMB-AS1	OTTHUMG00000162743.1	lncRNA	2	0.519346
chr5	112173570	112175548	1978	+	ENSG00000250882.1	antisense	CTC-459M5.1	OTTHUMG00000162896.1	lncRNA	1	0.505561
chr5	112419583	112420978	1395	+	ENSG00000278921.2	lincRNA	EPB41L4A-AS2	OTTHUMG00000169519.1	lincRNA	1	0.716846
chr5	115770586	115770989	403	+	ENSG00000251118.1	processed_pseudogene	CTC-505O3.1	OTTHUMG00000162915.2	pseudogene	1	2.48139
chr5	122154496	122156015	1519	-	ENSG00000249610.1	antisense	CTC-441N14.1	OTTHUMG00000162971.1	lncRNA	1	0.658328
chr5	130140031	130141950	1919	+	ENSG00000248610.1	processed_pseudogene	HSPA8P4	OTTHUMG00000163044.1	pseudogene	1	0.521105
chr5	132179234	132181128	1894	-	ENSG00000224015.1	lincRNA	AC063976.3	OTTHUMG00000059642.1	lincRNA	1	0.527983
chr5	134005147	134005562	415	+	ENSG00000271737.1	lincRNA	CTB-113I20.2	OTTHUMG00000185563.1	lincRNA	1	2.40964
chr5	139648999	139649728	729	-	ENSG00000250635.1	lincRNA	CTD-3224K15.2	OTTHUMG00000163330.1	lincRNA	1	1.37174
chr5	139775305	139775472	167	+	ENSG00000271792.1	lincRNA	CTB-35F21.5	OTTHUMG00000185580.1	lincRNA	1	5.98802
chr5	141350109	141350662	553	-	ENSG00000280026.1	antisense	AC005618.8	OTTHUMG00000189141.1	lncRNA	1	1.80832
chr5	142317620	142318322	702	-	ENSG00000281881.1	lincRNA	SPRY4-IT1	OTTHUMG00000189512.1	lincRNA	1	1.4245
chr5	147887112	147887704	592	+	ENSG00000251320.1	antisense	CTC-327F10.4	OTTHUMG00000163419.1	lncRNA	1	1.68919
chr5	149430286	149432834	2548	+	ENSG00000269936.3	lincRNA	RP11-394O4.5	OTTHUMG00000184101.1	lincRNA	2	0.784929
chr5	159950493	159951498	1005	-	ENSG00000248626.1	processed_pseudogene	GAPDHP40	OTTHUMG00000159985.1	pseudogene	1	0.995025
chr5	173144162	173145039	877	-	ENSG00000253172.1	antisense	CTC-209H22.3	OTTHUMG00000163320.1	lncRNA	2	2.2805
chr5	177554824	177555364	540	+	ENSG00000272459.1	lincRNA	RP11-1277A3.3	OTTHUMG00000185636.1	lincRNA	1	1.85185
chr5	180293245	180295253	2008	+	ENSG00000248367.1	antisense	CTB-129O4.1	OTTHUMG00000163311.1	lncRNA	1	0.498008
chr5	181191046	181191852	806	-	ENSG00000248473.1	lincRNA	CTC-338M12.2	OTTHUMG00000162379.1	lincRNA	1	1.24069
chr6	2910613	2912113	1500	-	ENSG00000232999.1	unitary_pseudogene	RP1-90J20.10	OTTHUMG00000155040.1	pseudogene	1	0.666667
chr6	2987967	2991173	3206	+	ENSG00000244041.7	lincRNA	LINC01011	OTTHUMG00000014128.5	lincRNA	2	0.62383
chr6	3978062	3979099	1037	+	ENSG00000216657.1	processed_pseudogene	GLRX3P2	OTTHUMG00000014155.1	pseudogene	1	0.96432
chr6	15247815	15248634	819	-	ENSG00000235488.1	antisense	JARID2-AS1	OTTHUMG00000014292.1	lncRNA	1	1.221
chr6	16761138	16762652	1514	+	ENSG00000229931.1	antisense	RP1-151F17.1	OTTHUMG00000153136.1	lncRNA	2	1.321
chr6	16764346	16766883	2537	+	ENSG00000272341.1	lincRNA	RP1-151F17.2	OTTHUMG00000185677.1	lincRNA	2	0.788333
chr6	17706257	17707344	1087	+	ENSG00000272269.1	antisense	RP11-500C11.3	OTTHUMG00000185678.1	lncRNA	1	0.919963
chr6	26321876	26322292	416	-	ENSG00000220875.1	processed_pseudogene	HIST1H3PS1	OTTHUMG00000014455.1	pseudogene	1	2.40385
chr6	28837869	28839006	1137	-	ENSG00000225173.1	lincRNA	XXbac-BPG308K3.5	OTTHUMG00000084883.1	lincRNA	1	0.879507
chr6	29071824	29072599	775	-	ENSG00000236909.1	unprocessed_pseudogene	OR2P1P	OTTHUMG00000031042.3	pseudogene	1	1.29032
chr6	29791753	29792750	997	-	ENSG00000176998.4	unprocessed_pseudogene	HCG4	OTTHUMG00000035423.2	pseudogene	1	1.00301
chr6	43770429	43770616	187	-	ENSG00000272114.1	antisense	RP1-261G23.7	OTTHUMG00000185751.1	lncRNA	1	5.34759
chr6	45421079	45422005	926	-	ENSG00000271857.1	antisense	RP1-244F24.1	OTTHUMG00000185755.1	lncRNA	1	1.07991
chr6	63571005	63572408	1403	-	ENSG00000266680.1	antisense	RP5-1148A21.3	OTTHUMG00000179475.1	lncRNA	1	0.712758
chr6	79233718	79236797	3079	+	ENSG00000270362.1	antisense	HMGN3-AS1	OTTHUMG00000185118.1	lncRNA	2	0.649562
chr6	85659892	85660606	714	-	ENSG00000220563.1	processed_pseudogene	PKMP3	OTTHUMG00000015143.1	pseudogene	1	1.40056
chr6	109382795	109383666	871	+	ENSG00000260273.1	antisense	RP11-425D10.10	OTTHUMG00000175937.1	lncRNA	1	1.14811
chr6	136550661	136552554	1893	+	ENSG00000272189.1	antisense	RP3-325F22.5	OTTHUMG00000185823.1	lncRNA	1	0.528262
chr6	137705423	137707201	1778	-	ENSG00000220412.1	processed_pseudogene	RP11-95M15.2	OTTHUMG00000015660.1	pseudogene	1	0.56243
chr6	138402585	138403560	975	-	ENSG00000215878.3	processed_pseudogene	MARCKSL1P2	OTTHUMG00000015672.2	pseudogene	1	1.02564
chr6	152898047	152899280	1233	+	ENSG00000217372.2	processed_pseudogene	TUBB4BP7	OTTHUMG00000015853.2	pseudogene	1	0.81103
chr6	157323964	157324477	513	+	ENSG00000271040.1	lincRNA	RP5-933K21.3	OTTHUMG00000185283.1	lincRNA	1	1.94932
chr6	166275462	166277077	1615	-	ENSG00000280850.1	lincRNA	RP4-655C5.9	OTTHUMG00000190284.1	lincRNA	1	0.619195
chr7	5426277	5428927	2650	-	ENSG00000234432.4	lincRNA	RP11-1275H24.1	OTTHUMG00000186131.1	lincRNA	2	0.754717
chr7	5428731	5429672	941	+	ENSG00000273084.1	lincRNA	RP11-1275H24.3	OTTHUMG00000186132.1	lincRNA	1	1.0627
chr7	5475804	5479811	4007	+	ENSG00000230733.2	lincRNA	AC092171.4	OTTHUMG00000151833.2	lincRNA	2	0.499127
chr7	12685637	12686033	396	+	ENSG00000271253.1	processed_pseudogene	CTD-2320J21.1	OTTHUMG00000184480.1	pseudogene	1	2.52525
chr7	22725395	22727620	2225	-	ENSG00000179428.2	antisense	AC073072.5	OTTHUMG00000152547.1	lncRNA	2	0.898876
chr7	28615097	28615888	791	-	ENSG00000225286.1	processed_pseudogene	AC005105.2	OTTHUMG00000152816.1	pseudogene	1	1.26422
chr7	50141540	50142823	1283	-	ENSG00000228005.1	antisense	AC020743.2	OTTHUMG00000155880.1	lncRNA	1	0.779423
chr7	55593777	55595006	1229	+	ENSG00000231394.1	lincRNA	RP11-310H4.3	OTTHUMG00000156122.1	lincRNA	1	0.81367
chr7	64569428	64570437	1009	-	ENSG00000213642.3	processed_pseudogene	RP11-561N12.5	OTTHUMG00000156538.1	pseudogene	1	0.99108
chr7	66493706	66495474	1768	+	ENSG00000237310.1	lincRNA	GS1-124K5.4	OTTHUMG00000156593.1	lincRNA	1	0.565611
chr7	105013425	105014321	896	-	ENSG00000239569.3	antisense	KMT2E-AS1	OTTHUMG00000157280.1	lncRNA	2	2.23214
chr7	107742817	107744581	1764	-	ENSG00000241764.3	antisense	AC002467.7	OTTHUMG00000154805.3	lncRNA	2	1.13379
chr7	121398452	121398767	315	+	ENSG00000213310.3	processed_pseudogene	CYCSP19	OTTHUMG00000157004.1	pseudogene	1	3.1746
chr7	123749068	123751166	2098	+	ENSG00000272686.1	antisense	RP11-390E23.6	OTTHUMG00000186321.1	lncRNA	2	0.953289
chr7	131753746	131754252	506	-	ENSG00000236281.1	processed_pseudogene	AC093106.5	OTTHUMG00000155054.1	pseudogene	1	1.97628
chr7	135168403	135169547	1144	+	ENSG00000272941.1	antisense	RP11-134L10.1	OTTHUMG00000186343.1	lncRNA	1	0.874126
chr7	139359032	139359566	534	-	ENSG00000273391.1	antisense	RP11-634H22.1	OTTHUMG00000186346.1	lncRNA	1	1.87266
chr7	143379692	143380495	803	-	ENSG00000232533.1	antisense	AC093673.5	OTTHUMG00000152694.1	lncRNA	1	1.24533
chr7	155295918	155297541	1623	-	ENSG00000273117.1	lincRNA	AC144652.1	OTTHUMG00000186379.1	lincRNA	1	0.616143
chr8	6928608	6930473	1865	+	ENSG00000254625.1	antisense	GS1-24F4.3	OTTHUMG00000165211.1	lncRNA	1	0.536193
chr8	11553224	11554207	983	-	ENSG00000254774.1	antisense	RP11-148O21.3	OTTHUMG00000165415.1	lncRNA	1	1.01729
chr8	15806149	15807283	1134	-	ENSG00000250483.1	processed_pseudogene	PPM1AP1	OTTHUMG00000161571.1	pseudogene	1	0.881834
chr8	18387108	18387777	669	-	ENSG00000271654.1	processed_pseudogene	RP11-685B14.3	OTTHUMG00000184844.1	pseudogene	1	1.49477
chr8	22565997	22567171	1174	-	ENSG00000254230.1	antisense	RP11-582J16.3	OTTHUMG00000163842.1	lncRNA	1	0.851789
chr8	30082758	30083467	709	+	ENSG00000272256.1	antisense	RP11-489E7.4	OTTHUMG00000185429.1	lncRNA	1	1.41044
chr8	41828165	41829934	1769	-	ENSG00000260588.1	lincRNA	RP11-930P14.2	OTTHUMG00000164085.2	lincRNA	2	1.13058
chr8	42151772	42152763	991	-	ENSG00000261449.1	antisense	RP11-589C21.5	OTTHUMG00000173375.1	lncRNA	1	1.00908
chr8	43276270	43276823	553	-	ENSG00000234713.3	processed_pseudogene	RP11-726G23.10	OTTHUMG00000164109.1	pseudogene	1	1.80832
chr8	51810110	51810681	571	-	ENSG00000272076.1	lincRNA	RP11-11C20.3	OTTHUMG00000185455.1	lincRNA	1	1.75131
chr8	56074592	56075274	682	+	ENSG00000253603.1	antisense	CTA-397H3.3	OTTHUMG00000164298.1	lncRNA	1	1.46628
chr8	81279871	81281446	1575	-	ENSG00000254027.1	antisense	RP11-363E6.3	OTTHUMG00000164598.1	lncRNA	1	0.634921
chr8	85177522	85178150	628	-	ENSG00000254208.1	antisense	RP11-219B4.3	OTTHUMG00000164786.1	lncRNA	1	1.59236
chr8	93915734	93916682	948	-	ENSG00000264448.3	lincRNA	RP3-388N13.5	OTTHUMG00000185504.1	lincRNA	1	1.05485
chr8	104990308	104990692	384	-	ENSG00000253997.1	processed_pseudogene	RP11-200A13.3	OTTHUMG00000164815.1	pseudogene	1	2.60417
chr8	122779971	122780830	859	-	ENSG00000272384.1	lincRNA	RP11-44N11.2	OTTHUMG00000185333.1	lincRNA	1	1.16414
chr8	123924759	123925933	1174	-	ENSG00000254000.1	lincRNA	RP11-245A18.1	OTTHUMG00000164999.1	lincRNA	1	0.851789
chr8	127400399	127402150	1751	+	ENSG00000280997.1	lincRNA	CCAT2	OTTHUMG00000189734.1	lincRNA	1	0.571102
chr8	134832747	134834482	1735	+	ENSG00000254028.1	lincRNA	AC083843.2	OTTHUMG00000164325.1	lincRNA	1	0.576369
chr8	140636281	140638283	2002	+	ENSG00000280303.2	lincRNA	ERICD	OTTHUMG00000164249.2	lincRNA	2	0.999001
chr8	143280161	143281690	1529	-	ENSG00000253716.5	antisense	LINC01604	OTTHUMG00000164976.1	lncRNA	1	0.654022
chr8	144078002	144079265	1263	-	ENSG00000255224.1	antisense	CTD-3065J16.9	OTTHUMG00000165436.1	lncRNA	1	0.791766
chr8	144409492	144409976	484	+	ENSG00000272115.1	antisense	GS1-393G12.14	OTTHUMG00000185629.1	lncRNA	1	2.06612
chr8	144463817	144465101	1284	+	ENSG00000254578.1	antisense	CTD-2517M22.16	OTTHUMG00000165651.1	lncRNA	1	0.778816
chr9	14068932	14069417	485	+	ENSG00000213954.3	processed_pseudogene	ATP5HP3	OTTHUMG00000019568.2	pseudogene	1	2.06186
chr9	21394888	21396346	1458	-	ENSG00000261696.1	lincRNA	RP11-354P17.15	OTTHUMG00000175506.1	lincRNA	1	0.685871
chr9	21455484	21456049	565	+	ENSG00000238271.2	unprocessed_pseudogene	IFNWP19	OTTHUMG00000019680.2	pseudogene	1	1.76991
chr9	21695176	21696943	1767	+	ENSG00000229835.2	processed_pseudogene	KHSRPP1	OTTHUMG00000019683.2	pseudogene	1	0.565931
chr9	21995482	21996013	531	+	ENSG00000266446.1	sense_intronic	RP11-149I2.4	OTTHUMG00000179348.1	lncRNA	1	1.88324
chr9	33719690	33722555	2865	+	ENSG00000227301.1	lincRNA	RP11-384P7.5	OTTHUMG00000000412.1	lincRNA	3	1.04712
chr9	34191555	34191881	326	+	ENSG00000227383.1	processed_pseudogene	RP11-571F15.2	OTTHUMG00000019811.2	pseudogene	1	3.06748
chr9	34546524	34546996	472	-	ENSG00000232983.2	processed_pseudogene	RP11-296L22.7	OTTHUMG00000000444.2	pseudogene	1	2.11864
chr9	35096378	35098141	1763	+	ENSG00000234181.1	antisense	RP11-182N22.8	OTTHUMG00000019849.1	lncRNA	1	0.567215
chr9	35646270	35647099	829	+	ENSG00000227933.1	antisense	RP11-331F9.4	OTTHUMG00000019866.1	lncRNA	1	1.20627
chr9	35657751	35658018	267	-	ENSG00000269900.3	lincRNA	RMRP	OTTHUMG00000184014.1	lincRNA	1	3.74532
chr9	35756712	35757940	1228	-	ENSG00000228843.2	antisense	RP11-112J3.15	OTTHUMG00000019883.2	lncRNA	1	0.814332
chr9	35859062	35859983	921	-	ENSG00000236083.1	unitary_pseudogene	OR13E1P	OTTHUMG00000019877.1	pseudogene	1	1.08578
chr9	69672749	69673713	964	+	ENSG00000261447.1	lincRNA	RP11-109D9.4	OTTHUMG00000175664.1	lincRNA	1	1.03734
chr9	76419934	76420631	697	+	ENSG00000233814.1	processed_pseudogene	RP11-66C24.1	OTTHUMG00000020042.1	pseudogene	1	1.43472
chr9	77176756	77177994	1238	-	ENSG00000232998.1	antisense	VPS13A-AS1	OTTHUMG00000020054.1	lncRNA	1	0.807754
chr9	86414282	86414570	288	+	ENSG00000235819.1	lincRNA	RP11-359J6.1	OTTHUMG00000020138.1	lincRNA	1	3.47222
chr9	91426238	91427144	906	+	ENSG00000233081.1	lincRNA	RP11-440G5.2	OTTHUMG00000020208.1	lincRNA	1	1.10375
chr9	99183373	99184891	1518	+	ENSG00000227269.1	lincRNA	RP11-96L7.2	OTTHUMG00000020352.1	lincRNA	1	0.658762
chr9	129480605	129482538	1933	-	ENSG00000261334.1	lincRNA	RP11-65J3.14	OTTHUMG00000175667.1	lincRNA	1	0.517331
chr9	132768965	132770212	1247	-	ENSG00000224992.2	sense_intronic	RP11-295G24.5	OTTHUMG00000020846.2	lncRNA	1	0.801925
chr9	136122521	136124363	1842	+	ENSG00000275329.1	lincRNA	RP11-83N9.6	OTTHUMG00000187245.1	lincRNA	1	0.542888
chr9	136975094	136976981	1887	+	ENSG00000238268.2	lincRNA	RP11-229P13.19	OTTHUMG00000020963.2	lincRNA	1	0.529942
chr9	137063535	137064581	1046	+	ENSG00000231864.2	antisense	RP11-229P13.23	OTTHUMG00000020975.2	lncRNA	1	0.956023
chr9	137286112	137287236	1124	+	ENSG00000270259.2	processed_pseudogene	RP13-122B23.9	OTTHUMG00000184711.2	pseudogene	1	0.88968
chr9	137293868	137295721	1853	-	ENSG00000260996.1	sense_overlapping	RP13-122B23.8	OTTHUMG00000175633.1	lncRNA	2	1.07933
chr10	8052242	8053449	1207	-	ENSG00000243350.1	lincRNA	RP11-379F12.3	OTTHUMG00000017641.1	lincRNA	1	0.8285
chr10	14877688	14878686	998	-	ENSG00000272853.1	lincRNA	RP11-398C13.6	OTTHUMG00000186172.1	lincRNA	1	1.002
chr10	19489101	19489400	299	+	ENSG00000239539.1	processed_pseudogene	HMGN1P20	OTTHUMG00000017774.1	pseudogene	1	3.34448
chr10	43136824	43138334	1510	-	ENSG00000273008.1	lincRNA	RP11-351D16.3	OTTHUMG00000186248.1	lincRNA	1	0.662252
chr10	43420738	43422100	1362	+	ENSG00000230555.2	lincRNA	RP11-517P14.2	OTTHUMG00000018028.2	lincRNA	1	0.734214
chr10	72274915	72275980	1065	-	ENSG00000269926.1	antisense	RP11-442H21.2	OTTHUMG00000018435.2	lncRNA	1	0.938967
chr10	73252791	73254349	1558	+	ENSG00000227540.1	antisense	RP11-152N13.5	OTTHUMG00000018458.1	lncRNA	1	0.641849
chr10	88727485	88728914	1429	+	ENSG00000226358.1	processed_pseudogene	KRT8P38	OTTHUMG00000018697.1	pseudogene	1	0.69979
chr10	91908131	91909348	1217	+	ENSG00000272817.1	antisense	RP11-402D21.2	OTTHUMG00000186460.1	lncRNA	1	0.821693
chr10	95183653	95184217	564	+	ENSG00000225533.1	processed_pseudogene	PAWRP1	OTTHUMG00000018807.1	pseudogene	1	1.77305
chr10	101060029	101061005	976	-	ENSG00000273162.1	lincRNA	RP11-108L7.15	OTTHUMG00000186479.1	lincRNA	1	1.02459
chr10	102642792	102644140	1348	-	ENSG00000272933.1	lincRNA	RP11-47A8.5	OTTHUMG00000186503.1	lincRNA	1	0.74184
chr10	133246478	133247891	1413	-	ENSG00000166917.8	antisense	MIR202HG	OTTHUMG00000170605.1	lncRNA	1	0.707714
chr11	1309769	1310707	938	+	ENSG00000255153.1	antisense	TOLLIP-AS1	OTTHUMG00000166230.1	lncRNA	1	1.0661
chr11	3854318	3855509	1191	-	ENSG00000228661.1	antisense	AC090587.5	OTTHUMG00000012285.1	lncRNA	1	0.839631
chr11	3854612	3855399	787	+	ENSG00000229368.1	sense_overlapping	AC090587.4	OTTHUMG00000012284.1	lncRNA	1	1.27065
chr11	6297189	6298606	1417	-	ENSG00000270435.1	processed_pseudogene	RP11-304C12.4	OTTHUMG00000184841.1	pseudogene	1	0.705716
chr11	6603642	6604420	778	-	ENSG00000254400.1	antisense	RP11-732A19.8	OTTHUMG00000166620.1	lncRNA	2	2.57069
chr11	9094377	9095890	1513	+	ENSG00000213538.5	processed_pseudogene	KRT8P41	OTTHUMG00000165715.1	pseudogene	1	0.660939
chr11	12086891	12089441	2550	+	ENSG00000255400.1	lincRNA	RP13-631K18.5	OTTHUMG00000165727.1	lincRNA	2	0.784314
chr11	14907518	14907986	468	+	ENSG00000253179.1	unprocessed_pseudogene	CALCP	OTTHUMG00000164573.23	pseudogene	1	2.13675
chr11	19710934	19712619	1685	-	ENSG00000270607.1	lincRNA	RP11-359E10.1	OTTHUMG00000185180.1	lincRNA	1	0.593472
chr11	43943787	43947206	3419	-	ENSG00000244953.1	lincRNA	RP11-613D13.8	OTTHUMG00000166556.1	lincRNA	2	0.584966
chr11	45771432	45772358	926	+	ENSG00000205106.4	lincRNA	DKFZp779M0652	OTTHUMG00000166518.1	lincRNA	2	2.15983
chr11	46238382	46239267	885	+	ENSG00000254639.1	lincRNA	CTD-2589M5.5	OTTHUMG00000166909.1	lincRNA	1	1.12994
chr11	47270657	47272110	1453	-	ENSG00000256746.5	antisense	RP11-17G12.3	OTTHUMG00000167884.1	lncRNA	1	0.688231
chr11	57476493	57477534	1041	-	ENSG00000255301.1	antisense	RP11-624G17.3	OTTHUMG00000167029.1	lncRNA	1	0.960615
chr11	59142121	59142610	489	-	ENSG00000255381.1	processed_pseudogene	AP001258.5	OTTHUMG00000167436.1	pseudogene	1	2.04499
chr11	59753015	59754975	1960	-	ENSG00000254477.1	antisense	AP000640.10	OTTHUMG00000167407.1	lncRNA	1	0.510204
chr11	62391516	62393372	1856	-	ENSG00000255126.1	antisense	CTD-2531D15.5	OTTHUMG00000167525.1	lncRNA	1	0.538793
chr11	62545999	62547699	1700	+	ENSG00000257058.1	antisense	RP11-864I4.4	OTTHUMG00000167749.1	lncRNA	1	0.588235
chr11	62786023	62786785	762	-	ENSG00000269176.2	antisense	RP11-727F15.12	OTTHUMG00000183002.2	lncRNA	1	1.31234
chr11	64449074	64451657	2583	+	ENSG00000181908.5	lincRNA	AP003774.4	OTTHUMG00000046124.3	lincRNA	2	0.774293
chr11	64778954	64779405	451	+	ENSG00000269038.1	lincRNA	AP001462.6	OTTHUMG00000066836.2	lincRNA	1	2.21729
chr11	65568482	65570423	1941	-	ENSG00000260233.3	processed_transcript	SSSCA1-AS1	OTTHUMG00000166387.2	processed_transcript	1	0.515198
chr11	66067277	66069619	2342	-	ENSG00000255038.1	antisense	RP11-1167A19.2	OTTHUMG00000166666.1	lncRNA	2	0.853971
chr11	66264777	66265666	889	-	ENSG00000254855.1	antisense	RP11-867G23.1	OTTHUMG00000166905.1	lncRNA	1	1.12486
chr11	66267635	66268129	494	-	ENSG00000254762.1	antisense	RP11-867G23.2	OTTHUMG00000166906.1	lncRNA	1	2.02429
chr11	67374416	67374932	516	+	ENSG00000275484.1	lincRNA	CTC-1337H24.4	OTTHUMG00000188153.1	lincRNA	1	1.93798
chr11	67612653	67616257	3604	-	ENSG00000231793.4	unitary_pseudogene	DOC2GP	OTTHUMG00000154229.1	pseudogene	2	0.554939
chr11	69000765	69002048	1283	-	ENSG00000261625.1	sense_overlapping	RP11-554A11.4	OTTHUMG00000172938.1	lncRNA	1	0.779423
chr11	69909184	69910994	1810	-	ENSG00000260348.1	lincRNA	RP11-643C9.1	OTTHUMG00000175910.1	lincRNA	1	0.552486
chr11	72351347	72353210	1863	+	ENSG00000256739.1	antisense	RP11-45F15.1	OTTHUMG00000167904.1	lncRNA	1	0.536769
chr11	87094734	87096585	1851	-	ENSG00000254843.1	processed_pseudogene	RP11-648O15.1	OTTHUMG00000167235.1	pseudogene	1	0.540249
chr11	118688039	118690600	2561	-	ENSG00000255239.1	unprocessed_pseudogene	AP002954.6	OTTHUMG00000166410.1	pseudogene	2	0.780945
chr11	118791254	118793137	1883	+	ENSG00000278376.1	lincRNA	RP11-158I9.8	OTTHUMG00000188156.1	lincRNA	2	1.06213
chr11	118885841	118887742	1901	-	ENSG00000245869.2	antisense	RP11-158I9.5	OTTHUMG00000166413.1	lncRNA	1	0.526039
chr11	119065263	119065677	414	-	ENSG00000271751.1	lincRNA	RP11-110I1.14	OTTHUMG00000185714.1	lincRNA	1	2.41546
chr11	124744634	124746337	1703	-	ENSG00000255045.1	antisense	RP11-677M14.2	OTTHUMG00000165929.1	lncRNA	1	0.587199
chr11	124891304	124892126	822	+	ENSG00000254943.1	antisense	RP11-664I21.6	OTTHUMG00000165937.1	lncRNA	1	1.21655
chr12	2752597	2753132	535	-	ENSG00000256902.1	processed_pseudogene	IQSEC3P1	OTTHUMG00000168141.1	pseudogene	1	1.86916
chr12	6532290	6533498	1208	-	ENSG00000255966.1	antisense	RP5-940J5.3	OTTHUMG00000169161.1	lncRNA	1	0.827815
chr12	6537794	6538370	576	-	ENSG00000269968.1	antisense	RP5-940J5.9	OTTHUMG00000183895.1	lncRNA	1	1.73611
chr12	6964949	6965382	433	+	ENSG00000271969.1	antisense	U47924.29	OTTHUMG00000185704.1	lncRNA	1	2.30947
chr12	25210652	25211233	581	+	ENSG00000274987.1	antisense	RP11-295I5.3	OTTHUMG00000187134.1	lncRNA	1	1.72117
chr12	25385670	25386241	571	-	ENSG00000278743.1	lincRNA	RP11-707G18.1	OTTHUMG00000187136.1	lincRNA	1	1.75131
chr12	46371463	46373778	2315	+	ENSG00000258096.1	antisense	RP11-474P2.2	OTTHUMG00000169472.1	lncRNA	2	0.863931
chr12	47817451	47817966	515	-	ENSG00000274737.1	sense_intronic	RP5-1057I20.6	OTTHUMG00000187387.2	lncRNA	1	1.94175
chr12	47905122	47906865	1743	+	ENSG00000278385.1	lincRNA	RP11-89H19.2	OTTHUMG00000187441.1	lincRNA	1	0.573723
chr12	48995150	48996334	1184	+	ENSG00000258283.1	antisense	RP11-386G11.3	OTTHUMG00000170404.1	lncRNA	1	0.844595
chr12	51820459	51822415	1956	-	ENSG00000261308.1	processed_pseudogene	FIGNL2	OTTHUMG00000175693.1	pseudogene	1	0.511247
chr12	53159586	53161000	1414	+	ENSG00000257808.1	lincRNA	RP11-1136G11.8	OTTHUMG00000170026.1	lincRNA	1	0.707214
chr12	53298655	53300314	1659	-	ENSG00000257605.2	antisense	RP11-680A11.5	OTTHUMG00000170029.2	lncRNA	1	0.602773
chr12	55646195	55646663	468	-	ENSG00000272837.1	unprocessed_pseudogene	OR10AE3P	OTTHUMG00000185941.1	pseudogene	1	2.13675
chr12	56118968	56119939	971	-	ENSG00000258345.1	antisense	RP11-603J24.6	OTTHUMG00000170141.1	lncRNA	1	1.02987
chr12	57726271	57728356	2085	+	ENSG00000255737.2	antisense	AGAP2-AS1	OTTHUMG00000170286.1	lncRNA	2	0.959233
chr12	62601751	62603690	1939	-	ENSG00000221949.5	lincRNA	LINC01465	OTTHUMG00000169983.2	lincRNA	1	0.51573
chr12	64451591	64452901	1310	-	ENSG00000277895.1	antisense	RP11-114F3.4	OTTHUMG00000168795.1	lncRNA	1	0.763359
chr12	67440998	67442559	1561	-	ENSG00000256172.1	lincRNA	RP11-473M14.3	OTTHUMG00000169068.1	lincRNA	1	0.640615
chr12	69284397	69285485	1088	+	ENSG00000257818.1	processed_pseudogene	C1GALT1P1	OTTHUMG00000169341.1	pseudogene	1	0.919118
chr12	75333798	75334486	688	-	ENSG00000273987.1	sense_intronic	RP11-585P4.6	OTTHUMG00000187280.1	lncRNA	1	1.45349
chr12	76878193	76880352	2159	+	ENSG00000257910.1	antisense	RP11-461F16.3	OTTHUMG00000169920.1	lncRNA	2	0.926355
chr12	94140077	94141337	1260	+	ENSG00000257360.1	processed_pseudogene	RP11-74K11.1	OTTHUMG00000170234.1	pseudogene	1	0.793651
chr12	96900697	96902698	2001	-	ENSG00000258846.1	processed_pseudogene	EEF1A1P33	OTTHUMG00000170603.1	pseudogene	1	0.49975
chr12	101773114	101773755	641	-	ENSG00000258230.2	transcribed_processed_pseudogene	RP11-511H9.3	OTTHUMG00000170445.2	pseudogene	1	1.56006
chr12	106250759	106252786	2027	+	ENSG00000277715.1	antisense	RP11-651L5.3	OTTHUMG00000187254.1	lncRNA	1	0.49334
chr12	118375350	118376275	925	-	ENSG00000270482.1	lincRNA	RP11-131L12.2	OTTHUMG00000185168.1	lincRNA	1	1.08108
chr12	122865335	122867021	1686	+	ENSG00000256152.2	lincRNA	RP11-463O12.3	OTTHUMG00000168766.2	lincRNA	1	0.59312
chr12	130047132	130048376	1244	+	ENSG00000256298.1	lincRNA	RP11-474D1.1	OTTHUMG00000168374.1	lincRNA	1	0.803859
chr12	132282814	132284606	1792	+	ENSG00000277011.1	lincRNA	RP13-895J2.6	OTTHUMG00000167983.1	lincRNA	1	0.558036
chr13	19587118	19588350	1232	+	ENSG00000225316.1	lincRNA	LINC00350	OTTHUMG00000016497.1	lincRNA	1	0.811688
chr13	19818121	19818619	498	-	ENSG00000233469.1	processed_pseudogene	ST6GALNAC4P1	OTTHUMG00000016501.1	pseudogene	1	2.00803
chr13	19863858	19865048	1190	+	ENSG00000275964.1	lincRNA	RP11-61K9.3	OTTHUMG00000187050.1	lincRNA	1	0.840336
chr13	27953526	27955370	1844	+	ENSG00000260704.1	lincRNA	LINC00543	OTTHUMG00000170880.1	lincRNA	1	0.542299
chr13	28136843	28138193	1350	-	ENSG00000261485.1	antisense	PAN3-AS1	OTTHUMG00000175971.1	lncRNA	1	0.740741
chr13	45340039	45341183	1144	+	ENSG00000273149.1	antisense	RP11-290D2.6	OTTHUMG00000186000.1	lncRNA	1	0.874126
chr13	98577244	98578830	1586	+	ENSG00000224418.1	antisense	STK24-AS1	OTTHUMG00000017249.1	lncRNA	1	0.630517
chr13	102903339	102904000	661	+	ENSG00000278445.1	lincRNA	RP11-255P5.3	OTTHUMG00000187302.1	lincRNA	1	1.51286
chr14	20305730	20306811	1081	+	ENSG00000258459.1	antisense	CTD-2292M16.7	OTTHUMG00000170853.1	lncRNA	1	0.925069
chr14	22556311	22557062	751	-	ENSG00000259054.1	lincRNA	AE000662.93	OTTHUMG00000170967.2	lincRNA	1	1.33156
chr14	22556640	22559037	2397	+	ENSG00000259003.1	lincRNA	AE000662.92	OTTHUMG00000170968.2	lincRNA	2	0.834376
chr14	23293852	23295798	1946	+	ENSG00000270433.1	transcribed_unprocessed_pseudogene	RP11-124D2.7	OTTHUMG00000184412.1	pseudogene	1	0.513875
chr14	34874343	34876459	2116	+	ENSG00000258738.1	antisense	RP11-73E17.2	OTTHUMG00000170792.1	lncRNA	2	0.94518
chr14	38605255	38606098	843	+	ENSG00000271468.1	processed_pseudogene	RP11-14N4.1	OTTHUMG00000184397.1	pseudogene	1	1.18624
chr14	48398310	48399375	1065	+	ENSG00000258750.2	processed_pseudogene	RP11-2G1.2	OTTHUMG00000170799.2	pseudogene	1	0.938967
chr14	65411170	65412690	1520	-	ENSG00000276116.2	antisense	FUT8-AS1	OTTHUMG00000186893.2	lncRNA	1	0.657895
chr14	70858844	70859429	585	-	ENSG00000258431.1	processed_pseudogene	RP1-292L20.2	OTTHUMG00000171284.3	pseudogene	1	1.7094
chr14	73539221	73539781	560	-	ENSG00000258408.1	processed_pseudogene	NT5CP2	OTTHUMG00000171604.1	pseudogene	1	1.78571
chr14	73571159	73571667	508	-	ENSG00000258524.1	processed_pseudogene	NT5CP1	OTTHUMG00000171605.1	pseudogene	1	1.9685
chr14	75294404	75296638	2234	+	ENSG00000259687.1	lincRNA	LINC01220	OTTHUMG00000171867.1	lincRNA	2	0.895255
chr14	85528599	85529386	787	+	ENSG00000258945.1	lincRNA	RP11-497E19.2	OTTHUMG00000171371.1	lincRNA	1	1.27065
chr14	88551597	88552493	896	+	ENSG00000258789.1	antisense	RP11-507K2.3	OTTHUMG00000170802.1	lncRNA	1	1.11607
chr14	90697333	90699374	2041	+	ENSG00000258716.1	antisense	RP11-661G16.2	OTTHUMG00000171052.1	lncRNA	1	0.489956
chr14	95516136	95517911	1775	+	ENSG00000258572.1	lincRNA	RP11-1070N10.3	OTTHUMG00000171637.1	lincRNA	1	0.56338
chr14	96275046	96276723	1677	-	ENSG00000258729.2	lincRNA	RP11-404P21.6	OTTHUMG00000171413.1	lincRNA	1	0.596303
chr14	96500810	96502321	1511	-	ENSG00000260806.1	antisense	RP11-872J21.3	OTTHUMG00000171440.1	lncRNA	1	0.661813
chr14	101843394	101844122	728	-	ENSG00000259161.2	processed_pseudogene	CTD-2017C7.3	OTTHUMG00000171643.2	pseudogene	1	1.37363
chr14	103187221	103189028	1807	-	ENSG00000251533.2	lincRNA	LINC00605	OTTHUMG00000171894.1	lincRNA	1	0.553403
chr14	104137150	104137898	748	-	ENSG00000258748.1	antisense	CTD-2223O18.1	OTTHUMG00000171595.1	lncRNA	1	1.3369
chr15	29612570	29614274	1704	+	ENSG00000259300.2	processed_pseudogene	TUBBP8	OTTHUMG00000172188.3	pseudogene	1	0.586854
chr15	41016990	41018843	1853	-	ENSG00000280036.1	sense_intronic	RP11-540O11.8	OTTHUMG00000172520.1	lncRNA	1	0.539665
chr15	45198517	45199139	622	-	ENSG00000259932.1	sense_intronic	CTD-2651B20.7	OTTHUMG00000172833.1	lncRNA	2	3.21543
chr15	56887107	56888219	1112	+	ENSG00000276524.1	lincRNA	RP11-323F24.3	OTTHUMG00000186905.1	lincRNA	1	0.899281
chr15	57527187	57529009	1822	-	ENSG00000261265.1	lincRNA	CTD-2515H24.4	OTTHUMG00000176408.1	lincRNA	1	0.548847
chr15	60593027	60593460	433	+	ENSG00000273958.1	lincRNA	RP11-219B17.3	OTTHUMG00000186916.1	lincRNA	1	2.30947
chr15	62060503	62062434	1931	+	ENSG00000259251.2	antisense	RP11-643M14.1	OTTHUMG00000171941.2	lncRNA	1	0.517866
chr15	63046034	63049387	3353	-	ENSG00000259498.1	antisense	RP11-244F12.3	OTTHUMG00000172299.1	lncRNA	2	0.596481
chr15	65083042	65083663	621	-	ENSG00000278737.1	lincRNA	RP11-325L12.7	OTTHUMG00000186925.1	lincRNA	1	1.61031
chr15	74303005	74304343	1338	+	ENSG00000261384.1	sense_intronic	RP11-60L3.2	OTTHUMG00000172634.1	lncRNA	1	0.747384
chr15	74374678	74375511	833	+	ENSG00000274937.1	lincRNA	CTD-2311M21.4	OTTHUMG00000186953.1	lincRNA	1	1.20048
chr15	75251743	75252934	1191	-	ENSG00000261205.2	processed_pseudogene	NIFKP4	OTTHUMG00000172670.2	pseudogene	1	0.839631
chr15	75368155	75369584	1429	+	ENSG00000260274.1	lincRNA	RP11-817O13.8	OTTHUMG00000173067.1	lincRNA	1	0.69979
chr15	75452964	75453947	983	-	ENSG00000276744.1	sense_intronic	CTD-2562G15.3	OTTHUMG00000186962.1	lncRNA	1	1.01729
chr15	75624793	75625690	897	+	ENSG00000260235.1	antisense	CTD-2026K11.3	OTTHUMG00000172791.1	lncRNA	1	1.11483
chr15	75639760	75640976	1216	+	ENSG00000275454.1	antisense	CTD-2026K11.4	OTTHUMG00000186970.1	lncRNA	1	0.822368
chr15	86914443	86916155	1712	+	ENSG00000273540.1	sense_intronic	RP11-133L19.3	OTTHUMG00000172873.1	lncRNA	1	0.584112
chr15	90932586	90935130	2544	-	ENSG00000224441.1	antisense	AC068831.3	OTTHUMG00000141259.1	lncRNA	2	0.786164
chr16	2464950	2468213	3263	-	ENSG00000259895.1	antisense	RP11-715J22.2	OTTHUMG00000177050.1	lncRNA	2	0.612933
chr16	3003431	3005101	1670	-	ENSG00000262362.1	sense_overlapping	LA16c-380H5.2	OTTHUMG00000177449.1	lncRNA	1	0.598802
chr16	3263743	3267567	3824	+	ENSG00000281005.1	lincRNA	LINC00921	OTTHUMG00000189522.1	lincRNA	2	0.523013
chr16	12093627	12095307	1680	-	ENSG00000261293.1	antisense	RP11-276H1.2	OTTHUMG00000172961.2	lncRNA	1	0.595238
chr16	21950218	21951708	1490	-	ENSG00000274460.1	processed_transcript	CTD-2649C14.2	OTTHUMG00000186800.1	processed_transcript	1	0.671141
chr16	22007480	22008062	582	-	ENSG00000275445.1	antisense	CTD-2649C14.3	OTTHUMG00000186802.1	lncRNA	1	1.71821
chr16	25106569	25107102	533	-	ENSG00000275494.1	sense_intronic	RP11-266L9.8	OTTHUMG00000186826.1	lncRNA	1	1.87617
chr16	28553709	28554140	431	-	ENSG00000275441.1	antisense	RP11-666O2.2	OTTHUMG00000186839.1	lncRNA	1	2.32019
chr16	28822431	28823969	1538	-	ENSG00000275807.1	antisense	RP11-1348G14.8	OTTHUMG00000188139.1	lncRNA	1	0.650195
chr16	28862166	28863340	1174	-	ENSG00000261766.1	antisense	RP11-22P6.2	OTTHUMG00000176591.1	lncRNA	1	0.851789
chr16	29806496	29807732	1236	-	ENSG00000259952.1	antisense	AC009133.15	OTTHUMG00000177140.1	lncRNA	1	0.809061
chr16	29862760	29863417	657	+	ENSG00000278713.1	antisense	CTD-2574D22.7	OTTHUMG00000186861.1	lncRNA	2	3.04414
chr16	30355441	30357104	1663	+	ENSG00000260219.2	lincRNA	RP11-347C12.10	OTTHUMG00000176862.2	lincRNA	1	0.601323
chr16	30615256	30615679	423	-	ENSG00000260678.1	transcribed_processed_pseudogene	RP11-146F11.4	OTTHUMG00000176952.1	pseudogene	1	2.36407
chr16	30956872	30957199	327	-	ENSG00000275263.1	lincRNA	RP11-1072A3.4	OTTHUMG00000186886.1	lincRNA	1	3.0581
chr16	31456711	31459736	3025	-	ENSG00000260267.1	antisense	RP11-452L6.5	OTTHUMG00000176617.1	lncRNA	2	0.661157
chr16	50806668	50807629	961	+	ENSG00000261703.1	lincRNA	RP11-327F22.5	OTTHUMG00000173406.1	lincRNA	1	1.04058
chr16	56609501	56611375	1874	-	ENSG00000260823.1	lincRNA	RP11-249C24.10	OTTHUMG00000176939.1	lincRNA	1	0.533618
chr16	56643705	56644786	1081	+	ENSG00000205361.8	transcribed_unprocessed_pseudogene	MT1DP	OTTHUMG00000158354.2	pseudogene	1	0.925069
chr16	57461055	57462737	1682	+	ENSG00000260345.1	processed_transcript	AC009052.12	OTTHUMG00000176595.1	processed_transcript	1	0.59453
chr16	66549280	66551189	1909	+	ENSG00000261519.3	lincRNA	RP11-403P17.4	OTTHUMG00000176438.1	lincRNA	1	0.523834
chr16	66579983	66580716	733	-	ENSG00000260650.1	antisense	RP11-403P17.2	OTTHUMG00000175511.1	lncRNA	1	1.36426
chr16	67430667	67431464	797	-	ENSG00000261320.1	lincRNA	RP11-297D21.2	OTTHUMG00000175505.1	lincRNA	1	1.25471
chr16	67561411	67562309	898	-	ENSG00000259804.1	antisense	CTD-2012K14.7	OTTHUMG00000172888.1	lncRNA	1	1.11359
chr16	73232055	73233970	1915	+	ENSG00000261227.2	lincRNA	AC140912.1	OTTHUMG00000172965.2	lincRNA	1	0.522193
chr16	75694434	75696107	1673	-	ENSG00000282757.1	unprocessed_pseudogene	RP11-490B18.8	OTTHUMG00000191434.1	pseudogene	1	0.597729
chr16	86221423	86222729	1306	-	ENSG00000270058.1	lincRNA	RP11-514D23.3	OTTHUMG00000183864.1	lincRNA	1	0.765697
chr16	87773488	87779374	5886	-	ENSG00000260498.5	lincRNA	RP4-536B24.4	OTTHUMG00000176390.1	lincRNA	3	0.509684
chr16	89166383	89169147	2764	+	ENSG00000205015.1	lincRNA	RP11-46C24.3	OTTHUMG00000175525.1	lincRNA	2	0.723589
chr17	1711493	1717174	5681	-	ENSG00000186594.12	lincRNA	MIR22HG	OTTHUMG00000132197.7	lincRNA	3	0.528076
chr17	4731756	4732371	615	-	ENSG00000261898.2	antisense	RP11-314A20.5	OTTHUMG00000177897.2	lncRNA	1	1.62602
chr17	4967995	4968822	827	+	ENSG00000262429.1	antisense	RP5-1050D4.3	OTTHUMG00000177764.1	lncRNA	1	1.20919
chr17	5019214	5020093	879	-	ENSG00000227495.1	antisense	AC109333.10	OTTHUMG00000132924.2	lncRNA	1	1.13766
chr17	6749685	6749978	293	-	ENSG00000262990.1	processed_pseudogene	CTC-281F24.2	OTTHUMG00000177868.1	pseudogene	1	3.41297
chr17	6749718	6750188	470	+	ENSG00000244283.1	processed_pseudogene	RPL23AP73	OTTHUMG00000157675.1	pseudogene	1	2.12766
chr17	7436557	7437523	966	-	ENSG00000262624.1	antisense	RP11-104H15.9	OTTHUMG00000178213.1	lncRNA	1	1.0352
chr17	8079482	8081565	2083	+	ENSG00000214999.3	antisense	AC129492.6	OTTHUMG00000132872.1	lncRNA	2	0.960154
chr17	15261015	15265707	4692	+	ENSG00000265445.1	antisense	RP11-849N15.1	OTTHUMG00000178498.1	lncRNA	3	0.639386
chr17	16427474	16428719	1245	+	ENSG00000239203.1	processed_transcript	AC093484.4	OTTHUMG00000058991.1	processed_transcript	1	0.803213
chr17	20008051	20009234	1183	-	ENSG00000261033.1	antisense	RP11-209D14.2	OTTHUMG00000175977.2	lncRNA	1	0.845309
chr17	22693325	22694831	1506	-	ENSG00000264431.1	processed_pseudogene	RP11-285M22.2	OTTHUMG00000179097.2	pseudogene	1	0.664011
chr17	27351858	27352584	726	-	ENSG00000265683.1	processed_pseudogene	RP11-173M1.5	OTTHUMG00000179154.1	pseudogene	1	1.37741
chr17	28247444	28248289	845	+	ENSG00000265060.1	transcribed_unprocessed_pseudogene	PPY2P	OTTHUMG00000179302.1	pseudogene	1	1.18343
chr17	28416922	28417492	570	+	ENSG00000265541.1	unprocessed_pseudogene	H3F3BP2	OTTHUMG00000179306.1	pseudogene	1	1.75439
chr17	28848860	28849592	732	+	ENSG00000264138.1	unprocessed_pseudogene	RP11-20B24.3	OTTHUMG00000179496.1	pseudogene	2	2.73224
chr17	29591703	29592241	538	-	ENSG00000264647.1	antisense	RP11-68I3.7	OTTHUMG00000179725.1	lncRNA	1	1.85874
chr17	29639627	29640825	1198	+	ENSG00000263370.1	antisense	RP11-68I3.5	OTTHUMG00000179727.1	lncRNA	1	0.834725
chr17	32111562	32112590	1028	-	ENSG00000265574.1	processed_pseudogene	WDR45BP1	OTTHUMG00000179563.1	pseudogene	1	0.972763
chr17	32141226	32143135	1909	-	ENSG00000214708.4	antisense	AC090616.2	OTTHUMG00000132778.2	lncRNA	1	0.523834
chr17	32876759	32878637	1878	+	ENSG00000226377.1	antisense	AC084809.2	OTTHUMG00000132777.1	lncRNA	1	0.532481
chr17	34080882	34082224	1342	-	ENSG00000263485.1	sense_intronic	CTC-304I17.4	OTTHUMG00000179673.1	lncRNA	1	0.745156
chr17	37649133	37650894	1761	+	ENSG00000274244.1	lincRNA	RP11-697E22.3	OTTHUMG00000188477.1	lincRNA	1	0.567859
chr17	42679963	42682020	2057	+	ENSG00000267042.1	antisense	CTD-3193K9.4	OTTHUMG00000180642.1	lncRNA	2	0.97229
chr17	43917194	43917985	791	+	ENSG00000267496.4	lincRNA	FAM215A	OTTHUMG00000181798.1	lincRNA	1	1.26422
chr17	43938363	43938959	596	+	ENSG00000261514.1	lincRNA	RP11-527L4.2	OTTHUMG00000176999.1	lincRNA	1	1.67785
chr17	44328613	44331462	2849	+	ENSG00000267211.1	lincRNA	RP5-1067M6.3	OTTHUMG00000181815.1	lincRNA	2	0.702001
chr17	45146730	45148470	1740	-	ENSG00000276728.1	lincRNA	AC142472.6	OTTHUMG00000186651.1	lincRNA	1	0.574713
chr17	45585871	45586929	1058	+	ENSG00000264070.1	processed_pseudogene	DND1P1	OTTHUMG00000178253.1	pseudogene	1	0.94518
chr17	46193576	46196723	3147	+	ENSG00000214401.4	antisense	KANSL1-AS1	OTTHUMG00000178028.2	lncRNA	3	0.953289
chr17	47279526	47280047	521	-	ENSG00000276790.1	antisense	RP11-290H9.5	OTTHUMG00000186652.1	lncRNA	1	1.91939
chr17	47946802	47948275	1473	-	ENSG00000264019.1	antisense	RP11-6N17.6	OTTHUMG00000178296.1	lncRNA	1	0.678887
chr17	50094065	50094647	582	+	ENSG00000276851.1	lincRNA	RP5-875H18.9	OTTHUMG00000186661.1	lincRNA	1	1.71821
chr17	50396438	50397888	1450	+	ENSG00000253102.1	antisense	RP1-117B12.4	OTTHUMG00000162080.3	lncRNA	1	0.689655
chr17	50693448	50695449	2001	+	ENSG00000262967.1	antisense	RP11-294J22.6	OTTHUMG00000177508.1	lncRNA	1	0.49975
chr17	56939932	56941275	1343	+	ENSG00000262298.1	antisense	RP5-1107A17.3	OTTHUMG00000178127.1	lncRNA	1	0.744602
chr17	60315834	60316215	381	+	ENSG00000271626.1	processed_pseudogene	RP11-3K24.2	OTTHUMG00000184886.1	pseudogene	1	2.62467
chr17	61411751	61413280	1529	+	ENSG00000187013.4	lincRNA	C17orf82	OTTHUMG00000180077.1	lincRNA	2	1.30804
chr17	62966817	62968549	1732	-	ENSG00000266411.1	lincRNA	RP11-180P8.3	OTTHUMG00000179102.1	lincRNA	1	0.577367
chr17	68205489	68207493	2004	+	ENSG00000274712.1	lincRNA	RP11-147L13.15	OTTHUMG00000186697.1	lincRNA	1	0.499002
chr17	70166961	70169402	2441	-	ENSG00000267365.1	antisense	KCNJ2-AS1	OTTHUMG00000180350.1	lncRNA	2	0.819336
chr17	74209980	74213342	3362	-	ENSG00000246731.2	antisense	MGC16275	OTTHUMG00000166017.1	lncRNA	2	0.594884
chr17	74747319	74748912	1593	-	ENSG00000266036.1	antisense	RP11-452I5.2	OTTHUMG00000178862.1	lncRNA	1	0.627746
chr17	75876372	75879546	3174	+	ENSG00000267801.1	antisense	RP11-552F3.9	OTTHUMG00000179917.1	lncRNA	5	1.5753
chr17	80960766	80961713	947	-	ENSG00000262662.1	antisense	CTD-2561B21.3	OTTHUMG00000177624.1	lncRNA	1	1.05597
chr17	81023545	81025503	1958	-	ENSG00000262098.1	lincRNA	CTD-2561B21.10	OTTHUMG00000177696.1	lincRNA	1	0.510725
chr17	81345476	81345966	490	-	ENSG00000275966.1	lincRNA	RP11-1055B8.9	OTTHUMG00000186721.1	lincRNA	1	2.04082
chr17	81480523	81481570	1047	-	ENSG00000278200.1	lincRNA	RP13-766D20.4	OTTHUMG00000186760.1	lincRNA	1	0.95511
chr17	82153430	82154815	1385	+	ENSG00000265678.1	antisense	RP11-1376P16.2	OTTHUMG00000178560.1	lncRNA	1	0.722022
chr18	3770017	3771430	1413	-	ENSG00000266513.1	sense_intronic	RP11-874J12.3	OTTHUMG00000178332.1	lncRNA	1	0.707714
chr18	5236724	5238598	1874	-	ENSG00000264575.1	lincRNA	LINC00526	OTTHUMG00000178804.1	lincRNA	1	0.533618
chr18	6728821	6729862	1041	-	ENSG00000266441.1	antisense	RP11-91I8.3	OTTHUMG00000178470.1	lncRNA	1	0.960615
chr18	6873399	6875024	1625	-	ENSG00000263797.1	antisense	RP11-146G7.2	OTTHUMG00000178874.1	lncRNA	1	0.615385
chr18	8801656	8802305	649	+	ENSG00000272788.1	sense_intronic	RP11-674N23.4	OTTHUMG00000186222.1	lncRNA	1	1.54083
chr18	24402153	24402714	561	+	ENSG00000273321.1	lincRNA	RP11-621L6.3	OTTHUMG00000186241.1	lincRNA	1	1.78253
chr18	48962951	48963941	990	-	ENSG00000266905.1	lincRNA	RP11-1058N17.1	OTTHUMG00000179909.1	lincRNA	1	1.0101
chr18	58398663	58400082	1419	-	ENSG00000267396.1	antisense	RP11-845C23.3	OTTHUMG00000179965.1	lncRNA	1	0.704722
chr18	58670009	58671877	1868	-	ENSG00000267226.2	antisense	RP11-126O1.5	OTTHUMG00000180006.2	lncRNA	1	0.535332
chr18	59696459	59698111	1652	+	ENSG00000267774.2	antisense	RP11-2N1.2	OTTHUMG00000180091.2	lncRNA	1	0.605327
chr18	61957273	61958014	741	-	ENSG00000267597.1	processed_pseudogene	RPIAP1	OTTHUMG00000180097.1	pseudogene	1	1.34953
chr18	76256891	76258337	1446	+	ENSG00000264212.1	lincRNA	RP11-94B19.3	OTTHUMG00000179136.1	lincRNA	1	0.691563
chr18	76805151	76805736	585	-	ENSG00000278107.1	lincRNA	RP11-162A12.4	OTTHUMG00000186681.1	lincRNA	1	1.7094
chr19	999796	1002757	2961	-	ENSG00000266990.1	antisense	LLNLR-284B4.2	OTTHUMG00000189099.1	lncRNA	2	0.675447
chr19	1852382	1853622	1240	+	ENSG00000267125.2	antisense	CTB-31O20.6	OTTHUMG00000179993.2	lncRNA	1	0.806452
chr19	1860250	1862019	1769	+	ENSG00000267141.1	antisense	CTB-31O20.8	OTTHUMG00000179995.1	lncRNA	1	0.565291
chr19	2610155	2611862	1707	-	ENSG00000267412.1	sense_intronic	CTC-265F19.2	OTTHUMG00000180437.1	lncRNA	1	0.585823
chr19	10259109	10260045	936	-	ENSG00000267105.1	antisense	CTD-2369P2.4	OTTHUMG00000180402.1	lncRNA	1	1.06838
chr19	13153071	13154193	1122	-	ENSG00000267598.1	antisense	CTC-250I14.6	OTTHUMG00000180791.1	lncRNA	2	1.78253
chr19	13796574	13796933	359	-	ENSG00000267582.1	antisense	CTD-3252C9.2	OTTHUMG00000181753.1	lncRNA	1	2.78552
chr19	16801426	16801714	288	+	ENSG00000269799.1	sense_intronic	CTD-2538G9.6	OTTHUMG00000182641.1	lncRNA	1	3.47222
chr19	17296196	17296695	499	-	ENSG00000269815.1	sense_intronic	CTD-2278I10.4	OTTHUMG00000182664.1	lncRNA	1	2.00401
chr19	36378028	36378832	804	+	ENSG00000266973.1	antisense	CTD-3162L10.3	OTTHUMG00000180676.1	lncRNA	1	1.24378
chr19	39532412	39534422	2010	+	ENSG00000269792.1	antisense	CTB-60E11.9	OTTHUMG00000183069.1	lncRNA	1	0.497512
chr19	43553445	43555494	2049	+	ENSG00000269177.1	antisense	L34079.3	OTTHUMG00000182732.1	lncRNA	1	0.488043
chr19	45641494	45642840	1346	+	ENSG00000267757.4	processed_transcript	EML2-AS1	OTTHUMG00000182128.1	processed_transcript	1	0.742942
chr19	46728603	46732700	4097	+	ENSG00000269487.1	antisense	CTB-174O21.2	OTTHUMG00000183433.1	lncRNA	2	0.488162
chr19	47607873	47608454	581	-	ENSG00000277383.1	antisense	CTD-3001H11.2	OTTHUMG00000186770.1	lncRNA	1	1.72117
chr19	47863483	47865341	1858	-	ENSG00000259108.2	lincRNA	LINC01595	OTTHUMG00000170611.2	lincRNA	1	0.538213
chr19	49688853	49690573	1720	-	ENSG00000268677.1	antisense	CTB-33G10.6	OTTHUMG00000183248.1	lncRNA	1	0.581395
chr19	50486810	50487638	828	-	ENSG00000268518.1	lincRNA	CTD-2545M3.8	OTTHUMG00000183047.1	lincRNA	1	1.20773
chr19	53512092	53512616	524	-	ENSG00000274892.1	unprocessed_pseudogene	CTB-167G5.7	OTTHUMG00000188032.1	pseudogene	1	1.9084
chr19	53772506	53773280	774	-	ENSG00000229000.1	processed_pseudogene	SEPT7P8	OTTHUMG00000060777.1	pseudogene	1	1.29199
chr19	54031412	54031504	92	+	ENSG00000276206.1	unprocessed_pseudogene	CTD-3093M3.1	OTTHUMG00000188518.1	pseudogene	1	10.8696
chr19	54438665	54439544	879	-	ENSG00000267838.2	lincRNA	AC008746.12	OTTHUMG00000150514.2	lincRNA	1	1.13766
chr19	55670632	55672069	1437	+	ENSG00000267096.1	sense_intronic	CTD-2537I9.13	OTTHUMG00000180910.1	lncRNA	1	0.695894
chr19	57350848	57352012	1164	-	ENSG00000268678.1	antisense	CTC-444N24.13	OTTHUMG00000183244.1	lncRNA	1	0.859107
chr20	267186	268857	1671	+	ENSG00000272874.1	lincRNA	RP5-1103G7.10	OTTHUMG00000186509.1	lincRNA	1	0.598444
chr20	3888239	3888868	629	-	ENSG00000229539.1	antisense	RP11-119B16.2	OTTHUMG00000031766.1	lncRNA	1	1.58983
chr20	21302731	21303704	973	-	ENSG00000275457.1	antisense	RP1-198K11.5	OTTHUMG00000186716.1	lncRNA	1	1.02775
chr20	25284915	25285588	673	-	ENSG00000276952.1	antisense	RP5-965G21.6	OTTHUMG00000186746.1	lncRNA	1	1.48588
chr20	25669857	25670386	529	-	ENSG00000236542.1	processed_pseudogene	MED28P7	OTTHUMG00000032128.1	pseudogene	1	1.89036
chr20	31721507	31723409	1902	+	ENSG00000281376.1	antisense	ABALON	OTTHUMG00000189574.1	lncRNA	1	0.525762
chr20	34475924	34476474	550	-	ENSG00000181741.7	processed_pseudogene	FDX1P1	OTTHUMG00000032297.1	pseudogene	1	1.81818
chr20	34476205	34476787	582	+	ENSG00000277558.1	sense_intronic	RP3-468O1.6	OTTHUMG00000186779.1	lncRNA	1	1.71821
chr20	37095785	37097178	1393	+	ENSG00000269846.1	antisense	RP4-621N11.2	OTTHUMG00000187317.1	lncRNA	1	0.717875
chr20	38962472	38962993	521	+	ENSG00000277581.1	sense_intronic	RP4-616B8.6	OTTHUMG00000186879.1	lncRNA	1	1.91939
chr20	44448777	44450092	1315	-	ENSG00000237907.1	antisense	LINC01430	OTTHUMG00000032534.2	lncRNA	1	0.760456
chr20	45229817	45230191	374	+	ENSG00000233352.1	unprocessed_pseudogene	RP1-300I2.3	OTTHUMG00000154638.1	pseudogene	1	2.6738
chr20	59515191	59516039	848	+	ENSG00000227282.1	lincRNA	RP11-164D18.2	OTTHUMG00000137386.1	lincRNA	1	1.17925
chr21	36388878	36389112	234	-	ENSG00000224421.1	processed_pseudogene	ATP5J2LP	OTTHUMG00000086613.1	pseudogene	1	4.2735
chr21	36994643	36995075	432	+	ENSG00000215734.3	processed_pseudogene	MRPL20P1	OTTHUMG00000086645.1	pseudogene	1	2.31481
chr21	37267784	37268497	713	+	ENSG00000272948.2	antisense	AP001412.1	OTTHUMG00000186494.2	lncRNA	1	1.40252
chr21	39313935	39314962	1027	+	ENSG00000255568.3	antisense	BRWD1-AS2	OTTHUMG00000066154.5	lncRNA	1	0.97371
chr22	20110821	20111875	1054	-	ENSG00000243762.1	antisense	AC006547.8	OTTHUMG00000150489.2	lncRNA	1	0.948767
chr22	22103219	22104857	1638	+	ENSG00000225741.1	unprocessed_pseudogene	LL22NC03-88E1.17	OTTHUMG00000150843.1	pseudogene	1	0.610501
chr22	22692778	22693312	534	-	ENSG00000223999.1	lincRNA	LL22NC03-102D1.18	OTTHUMG00000151209.1	lincRNA	1	1.87266
chr22	23856427	23857039	612	-	ENSG00000272973.1	antisense	KB-1125A3.11	OTTHUMG00000186120.1	lncRNA	1	1.63399
chr22	24516508	24518386	1878	+	ENSG00000228923.1	antisense	AP000355.2	OTTHUMG00000150750.1	lncRNA	1	0.532481
chr22	25048967	25051966	2999	-	ENSG00000279006.1	antisense	CTA-243E7.2	OTTHUMG00000189170.1	lncRNA	2	0.666889
chr22	29608900	29609501	601	+	ENSG00000233010.1	processed_pseudogene	RPEP4	OTTHUMG00000155625.1	pseudogene	1	1.66389
chr22	30246205	30246998	793	+	ENSG00000268812.3	antisense	RP1-102K2.8	OTTHUMG00000186198.1	lncRNA	1	1.26103
chr22	31082156	31083565	1409	-	ENSG00000273387.1	antisense	RP3-412A9.16	OTTHUMG00000186126.1	lncRNA	1	0.709723
chr22	37950965	37951778	813	+	ENSG00000272582.1	antisense	RP5-1039K5.17	OTTHUMG00000186180.1	lncRNA	1	1.23001
chr22	42278188	42278846	658	+	ENSG00000273366.1	lincRNA	CTA-989H11.1	OTTHUMG00000186179.1	lincRNA	1	1.51976
chr22	44566965	44568247	1282	+	ENSG00000215333.3	processed_pseudogene	KRT18P23	OTTHUMG00000150459.1	pseudogene	1	0.780031
chr22	46013606	46015498	1892	+	ENSG00000273145.1	lincRNA	CITF22-92A6.1	OTTHUMG00000170172.1	lincRNA	1	0.528541
chr22	46295143	46296660	1517	-	ENSG00000277232.2	lincRNA	GTSE1-AS1	OTTHUMG00000189497.1	lincRNA	1	0.659196
chrX	41275739	41276778	1039	+	ENSG00000223714.1	lincRNA	RP5-1172N10.2	OTTHUMG00000021366.1	lincRNA	1	0.962464
chrX	49876724	49879241	2517	-	ENSG00000234390.4	lincRNA	USP27X-AS1	OTTHUMG00000024154.2	lincRNA	2	0.794597
chrX	85851575	85851682	107	-	ENSG00000276892.1	processed_pseudogene	RP1-93L7.4	OTTHUMG00000188095.1	pseudogene	1	9.34579
chrX	103687284	103691772	4488	+	ENSG00000231154.1	antisense	MORF4L2-AS1	OTTHUMG00000022108.2	lncRNA	3	0.668449
chrX	103917411	103919548	2137	-	ENSG00000231728.3	antisense	LL0XNC01-116E7.2	OTTHUMG00000022115.3	lncRNA	2	0.935891
chrX	130330857	130331069	212	+	ENSG00000225046.2	processed_pseudogene	RP1-20I3.3	OTTHUMG00000022396.2	pseudogene	1	4.71698
chrX	153662162	153662692	530	+	ENSG00000237793.3	processed_pseudogene	RPL18AP16	OTTHUMG00000024214.3	pseudogene	1	1.88679

## Sheet: MCF-7
chromosome	start	end	width	strand	gene id	gene type	gene name	havana gene	biotype	CTCF count	CTCF density
chr1	2049203	2050070	867	-	ENSG00000226969.1	antisense	RP11-547D24.3	OTTHUMG00000041087.1	lncRNA	1	1.1534
chr1	3785008	3785538	530	+	ENSG00000272153.1	antisense	RP1-286D6.5	OTTHUMG00000185643.1	lncRNA	1	1.88679
chr1	6204840	6205780	940	-	ENSG00000226944.1	antisense	RP1-120G22.11	OTTHUMG00000041452.1	lncRNA	1	1.06383
chr1	7942372	7942726	354	+	ENSG00000270330.1	processed_pseudogene	RP5-892F13.2	OTTHUMG00000184257.1	pseudogene	1	2.82486
chr1	9182007	9183750	1743	-	ENSG00000228526.3	lincRNA	RP3-510D11.1	OTTHUMG00000001762.2	lincRNA	1	0.573723
chr1	9576427	9576985	558	+	ENSG00000231181.1	processed_pseudogene	RP13-15M17.1	OTTHUMG00000001323.1	pseudogene	1	1.79211
chr1	10058671	10059648	977	+	ENSG00000233623.2	processed_pseudogene	PGAM1P11	OTTHUMG00000001802.2	pseudogene	1	1.02354
chr1	10429881	10430677	796	-	ENSG00000271989.1	antisense	RP4-736L20.3	OTTHUMG00000185648.1	lncRNA	1	1.25628
chr1	20732880	20733952	1072	+	ENSG00000233069.1	antisense	RP5-930J4.2	OTTHUMG00000002621.1	lncRNA	1	0.932836
chr1	23949016	23949383	367	-	ENSG00000230228.2	processed_pseudogene	RP11-4M23.4	OTTHUMG00000013896.2	pseudogene	1	2.7248
chr1	26692132	26694131	1999	-	ENSG00000260063.1	antisense	RP5-968P14.2	OTTHUMG00000175777.1	lncRNA	1	0.50025
chr1	45303910	45305619	1709	+	ENSG00000281912.1	lincRNA	LINC01144	OTTHUMG00000189536.1	lincRNA	1	0.585138
chr1	47179250	47180339	1089	+	ENSG00000224805.2	antisense	LINC00853	OTTHUMG00000007850.2	lncRNA	1	0.918274
chr1	48227888	48229561	1673	-	ENSG00000272491.1	antisense	RP5-1024N4.4	OTTHUMG00000185781.1	lncRNA	1	0.597729
chr1	52943536	52943930	394	-	ENSG00000237279.2	processed_pseudogene	RP4-631H13.5	OTTHUMG00000008931.2	pseudogene	1	2.53807
chr1	54792885	54794905	2020	+	ENSG00000237453.1	antisense	RP11-67L3.2	OTTHUMG00000009987.3	lncRNA	1	0.49505
chr1	62038842	62039111	269	+	ENSG00000236646.1	processed_pseudogene	LAMTOR5P1	OTTHUMG00000008916.2	pseudogene	1	3.71747
chr1	62530636	62530873	237	+	ENSG00000270549.1	processed_pseudogene	RP11-293K19.1	OTTHUMG00000184290.1	pseudogene	1	4.21941
chr1	68282388	68282622	234	+	ENSG00000225242.2	processed_pseudogene	COX6B1P7	OTTHUMG00000009209.2	pseudogene	1	4.2735
chr1	74468195	74469543	1348	+	ENSG00000233894.1	antisense	RP4-650F12.2	OTTHUMG00000009610.1	lncRNA	1	0.74184
chr1	86703502	86704462	960	-	ENSG00000261737.1	antisense	RP4-612B15.3	OTTHUMG00000175864.1	lncRNA	1	1.04167
chr1	92749175	92749330	155	-	ENSG00000234202.2	processed_pseudogene	RP11-330C7.4	OTTHUMG00000010893.2	pseudogene	1	6.45161
chr1	108199926	108201491	1565	+	ENSG00000260879.1	antisense	RP11-483I13.5	OTTHUMG00000175898.1	lncRNA	1	0.638978
chr1	119886304	119886927	623	+	ENSG00000226446.1	processed_pseudogene	NOTCH2P1	OTTHUMG00000057603.1	pseudogene	1	1.60514
chr1	147840962	147842359	1397	+	ENSG00000223728.3	processed_pseudogene	RP11-314N2.2	OTTHUMG00000037548.2	pseudogene	1	0.71582
chr1	150255095	150257286	2191	-	ENSG00000276110.1	antisense	RP4-790G17.7	OTTHUMG00000185690.2	lncRNA	2	0.912825
chr1	151280024	151281929	1905	-	ENSG00000232671.5	antisense	RP11-126K1.2	OTTHUMG00000012346.6	lncRNA	1	0.524934
chr1	151340648	151341966	1318	+	ENSG00000224645.1	antisense	RP11-126K1.8	OTTHUMG00000073673.1	lncRNA	1	0.758725
chr1	153746851	153751227	4376	-	ENSG00000243613.1	antisense	RP11-216N14.8	OTTHUMG00000041238.1	lncRNA	3	0.685558
chr1	154480012	154481501	1489	+	ENSG00000273110.1	antisense	RP11-350G8.9	OTTHUMG00000186422.1	lncRNA	1	0.671592
chr1	170369223	170370367	1144	-	ENSG00000226967.1	processed_pseudogene	HAUS4P1	OTTHUMG00000034663.1	pseudogene	1	0.874126
chr1	179447578	179448440	862	-	ENSG00000224620.2	processed_pseudogene	MEF2AP1	OTTHUMG00000035267.2	pseudogene	1	1.16009
chr1	179953184	179954440	1256	-	ENSG00000260360.1	lincRNA	RP11-533E19.5	OTTHUMG00000176152.1	lincRNA	2	1.59236
chr1	181190471	181191149	678	-	ENSG00000225359.1	lincRNA	RP11-540K16.2	OTTHUMG00000035181.1	lincRNA	1	1.47493
chr1	182615254	182616629	1375	+	ENSG00000261504.1	lincRNA	RP11-317P15.4	OTTHUMG00000176155.1	lincRNA	1	0.727273
chr1	185317779	185318530	751	+	ENSG00000273004.1	lincRNA	GS1-279B7.2	OTTHUMG00000186480.1	lincRNA	1	1.33156
chr1	185435839	185436047	208	+	ENSG00000270920.1	processed_pseudogene	FAM195DP	OTTHUMG00000184457.1	pseudogene	1	4.80769
chr1	201222113	201223123	1010	-	ENSG00000229821.1	antisense	RP11-567E21.3	OTTHUMG00000040658.1	lncRNA	1	0.990099
chr1	203127259	203127954	695	-	ENSG00000234775.1	antisense	RP11-335O13.7	OTTHUMG00000043020.1	lncRNA	1	1.43885
chr1	203835585	203835912	327	-	ENSG00000223505.2	processed_pseudogene	RP11-397P13.7	OTTHUMG00000057667.2	pseudogene	1	3.0581
chr1	204131062	204131966	904	+	ENSG00000261065.1	antisense	RP11-74C13.4	OTTHUMG00000036063.1	lncRNA	1	1.10619
chr1	204528845	204529692	847	-	ENSG00000236779.1	processed_pseudogene	RP11-430C7.2	OTTHUMG00000035988.1	pseudogene	1	1.18064
chr1	206634649	206635622	973	-	ENSG00000237605.1	antisense	RP11-343H5.6	OTTHUMG00000036345.1	lncRNA	1	1.02775
chr1	206907619	206908229	610	+	ENSG00000226945.1	processed_pseudogene	RP11-564A8.4	OTTHUMG00000036458.1	pseudogene	1	1.63934
chr1	218344196	218345678	1482	-	ENSG00000232480.1	antisense	TGFB2-AS1	OTTHUMG00000039520.1	lncRNA	2	1.34953
chr1	226331999	226333655	1656	-	ENSG00000275406.1	unprocessed_pseudogene	RP11-125A15.3	OTTHUMG00000187548.1	pseudogene	1	0.603865
chr1	227234269	227235355	1086	+	ENSG00000228729.1	processed_pseudogene	RP11-211A18.2	OTTHUMG00000037614.1	pseudogene	1	0.92081
chr1	228274584	228276066	1482	-	ENSG00000269934.1	antisense	RP5-1139B12.3	OTTHUMG00000183901.1	lncRNA	1	0.674764
chr1	230280312	230281893	1581	-	ENSG00000224407.1	antisense	RP5-956O18.3	OTTHUMG00000037756.1	lncRNA	1	0.632511
chr1	234607008	234609483	2475	+	ENSG00000228830.1	antisense	RP4-781K5.2	OTTHUMG00000037978.1	lncRNA	2	0.808081
chr1	235104180	235104609	429	-	ENSG00000273416.1	lincRNA	RP4-597N16.4	OTTHUMG00000185835.1	lincRNA	1	2.331
chr1	239898016	239899872	1856	-	ENSG00000234601.1	antisense	CHRM3-AS1	OTTHUMG00000039650.1	lncRNA	1	0.538793
chr1	244969350	244971088	1738	-	ENSG00000272195.1	antisense	RP11-156E8.1	OTTHUMG00000185820.1	lncRNA	1	0.575374
chr1	247833349	247834288	939	-	ENSG00000230576.1	unprocessed_pseudogene	OR6R1P	OTTHUMG00000040202.1	pseudogene	1	1.06496
chr1	247936061	247937513	1452	-	ENSG00000226191.3	processed_pseudogene	CLK3P2	OTTHUMG00000040208.2	pseudogene	1	0.688705
chr2	7671604	7672246	642	-	ENSG00000230515.1	lincRNA	AC092580.3	OTTHUMG00000151592.1	lincRNA	1	1.55763
chr2	11681460	11683328	1868	+	ENSG00000228496.1	sense_intronic	AC106875.1	OTTHUMG00000151822.1	lncRNA	1	0.535332
chr2	12715415	12716227	812	+	ENSG00000261117.1	lincRNA	RP11-333O1.1	OTTHUMG00000175731.1	lincRNA	1	1.23153
chr2	20451042	20452947	1905	+	ENSG00000228950.1	lincRNA	AC023137.2	OTTHUMG00000151780.1	lincRNA	1	0.524934
chr2	21362292	21364025	1733	-	ENSG00000270654.1	processed_pseudogene	NUTF2P8	OTTHUMG00000184437.1	pseudogene	1	0.577034
chr2	28396815	28397110	295	+	ENSG00000270640.1	sense_intronic	RP11-373D23.2	OTTHUMG00000185291.1	lncRNA	1	3.38983
chr2	38535258	38536249	991	-	ENSG00000271443.1	transcribed_processed_pseudogene	RP11-541E12.1	OTTHUMG00000184445.1	pseudogene	1	1.00908
chr2	43227210	43228855	1645	+	ENSG00000279873.2	lincRNA	LINC01126	OTTHUMG00000152397.3	lincRNA	1	0.607903
chr2	48440043	48440597	554	-	ENSG00000272663.1	lincRNA	RP11-191L17.1	OTTHUMG00000185920.2	lincRNA	1	1.80505
chr2	48915267	48916530	1263	-	ENSG00000214602.3	processed_pseudogene	CTBP2P5	OTTHUMG00000151768.1	pseudogene	1	0.791766
chr2	55617909	55618373	464	+	ENSG00000272606.1	antisense	RP11-554J4.1	OTTHUMG00000185926.1	lncRNA	1	2.15517
chr2	64330486	64332131	1645	-	ENSG00000238012.1	lincRNA	AC114752.1	OTTHUMG00000152671.1	lincRNA	1	0.607903
chr2	64522187	64524093	1906	-	ENSG00000260101.1	lincRNA	RP11-568N6.1	OTTHUMG00000175896.1	lincRNA	1	0.524659
chr2	64644612	64646698	2086	+	ENSG00000226756.1	lincRNA	AC007365.3	OTTHUMG00000152702.1	lincRNA	1	0.479386
chr2	65666695	65667737	1042	+	ENSG00000214533.3	processed_pseudogene	KRT18P33	OTTHUMG00000152796.1	pseudogene	1	0.959693
chr2	70301451	70302072	621	+	ENSG00000233849.1	antisense	AC022201.5	OTTHUMG00000154180.1	lncRNA	2	3.22061
chr2	74148009	74150061	2052	+	ENSG00000225439.2	antisense	BOLA3-AS1	OTTHUMG00000152835.2	lncRNA	1	0.487329
chr2	74502595	74504678	2083	+	ENSG00000257702.3	antisense	LBX2-AS1	OTTHUMG00000170509.3	lncRNA	1	0.480077
chr2	76260755	76261661	906	-	ENSG00000271356.1	processed_pseudogene	RP11-335E8.1	OTTHUMG00000184501.1	pseudogene	1	1.10375
chr2	85186409	85187253	844	+	ENSG00000231134.1	sense_intronic	TCF7L1-IT1	OTTHUMG00000153211.1	lncRNA	1	1.18483
chr2	94737337	94738249	912	+	ENSG00000213355.3	processed_pseudogene	CNN2P8	OTTHUMG00000155130.1	pseudogene	1	1.09649
chr2	94759259	94760279	1020	-	ENSG00000223564.1	unprocessed_pseudogene	CYP4F32P	OTTHUMG00000155129.1	pseudogene	1	0.980392
chr2	95051395	95053176	1781	-	ENSG00000231062.1	antisense	AC103563.9	OTTHUMG00000155169.1	lncRNA	1	0.561482
chr2	95413456	95414296	840	-	ENSG00000248821.1	unprocessed_pseudogene	AC009238.6	OTTHUMG00000155175.1	pseudogene	1	1.19048
chr2	95525109	95526702	1593	-	ENSG00000272913.1	lincRNA	RP11-440D17.3	OTTHUMG00000186024.1	lincRNA	1	0.627746
chr2	104412227	104414008	1781	-	ENSG00000225765.1	lincRNA	AC068535.3	OTTHUMG00000153049.1	lincRNA	1	0.561482
chr2	109127327	109128930	1603	-	ENSG00000259863.1	lincRNA	SH3RF3-AS1	OTTHUMG00000153437.1	lincRNA	1	0.62383
chr2	111887914	111888741	827	+	ENSG00000236307.2	processed_pseudogene	EEF1E1P1	OTTHUMG00000153261.2	pseudogene	1	1.20919
chr2	113979909	113983258	3349	+	ENSG00000243179.1	lincRNA	AC110769.3	OTTHUMG00000153531.1	lincRNA	2	0.597193
chr2	127024252	127025723	1471	-	ENSG00000260634.1	lincRNA	RP11-521O16.1	OTTHUMG00000176160.1	lincRNA	2	1.35962
chr2	130692243	130693770	1527	-	ENSG00000223349.1	processed_pseudogene	KLF2P3	OTTHUMG00000154048.2	pseudogene	1	0.654879
chr2	130776646	130776957	311	+	ENSG00000232503.1	processed_pseudogene	CYCSP8	OTTHUMG00000154067.1	pseudogene	1	3.21543
chr2	131821987	131822920	933	-	ENSG00000274353.1	unprocessed_pseudogene	RP11-788A1.1	OTTHUMG00000187698.1	pseudogene	1	1.07181
chr2	169767185	169768799	1614	-	ENSG00000231550.1	processed_pseudogene	PTCHD3P2	OTTHUMG00000154119.1	pseudogene	1	0.619579
chr2	169790093	169790885	792	+	ENSG00000214369.2	processed_pseudogene	AC009967.3	OTTHUMG00000153985.1	pseudogene	1	1.26263
chr2	172427774	172428603	829	-	ENSG00000226963.1	antisense	AC078883.4	OTTHUMG00000154231.1	lncRNA	1	1.20627
chr2	172464262	172466022	1760	-	ENSG00000232788.1	antisense	AC078883.3	OTTHUMG00000154089.1	lncRNA	1	0.568182
chr2	173431349	173431812	463	-	ENSG00000213148.3	processed_pseudogene	AC073465.1	OTTHUMG00000154105.1	pseudogene	1	2.15983
chr2	177197985	177198547	562	+	ENSG00000213069.3	processed_pseudogene	KRT8P40	OTTHUMG00000154099.3	pseudogene	2	3.55872
chr2	177264359	177265515	1156	+	ENSG00000222043.2	antisense	AC079305.10	OTTHUMG00000154178.1	lncRNA	1	0.865052
chr2	177344443	177344836	393	+	ENSG00000237178.2	processed_pseudogene	AC019080.1	OTTHUMG00000154138.2	pseudogene	1	2.54453
chr2	183071040	183072486	1446	-	ENSG00000231203.1	processed_pseudogene	KRT8P10	OTTHUMG00000154237.2	pseudogene	1	0.691563
chr2	189311263	189311967	704	-	ENSG00000213601.3	processed_pseudogene	KRT18P19	OTTHUMG00000154302.1	pseudogene	1	1.42045
chr2	189762704	189765556	2852	+	ENSG00000253559.1	antisense	OSGEPL1-AS1	OTTHUMG00000164097.1	lncRNA	2	0.701262
chr2	202032770	202033537	767	-	ENSG00000273209.1	lincRNA	RP11-107N15.1	OTTHUMG00000186300.1	lincRNA	1	1.30378
chr2	202374932	202375604	672	-	ENSG00000273456.1	lincRNA	RP11-686O6.2	OTTHUMG00000186303.1	lincRNA	1	1.4881
chr2	206084605	206086564	1959	+	ENSG00000227946.1	lincRNA	AC007383.3	OTTHUMG00000154653.1	lincRNA	1	0.510465
chr2	208255247	208256181	934	+	ENSG00000231908.1	antisense	IDH1-AS1	OTTHUMG00000154707.1	lncRNA	1	1.07066
chr2	208269343	208269957	614	-	ENSG00000228380.1	processed_pseudogene	MYL6BP1	OTTHUMG00000154704.1	pseudogene	1	1.62866
chr2	208466238	208466626	388	-	ENSG00000227430.1	processed_pseudogene	AC019185.2	OTTHUMG00000154661.1	pseudogene	1	2.57732
chr2	218953401	218954050	649	-	ENSG00000224928.2	processed_pseudogene	KRT8P30	OTTHUMG00000154667.1	pseudogene	1	1.54083
chr2	221572506	221574454	1948	+	ENSG00000272944.1	antisense	CTD-2308L22.1	OTTHUMG00000186317.1	lncRNA	2	1.02669
chr2	222317242	222318653	1411	-	ENSG00000267034.1	lincRNA	RP11-384O8.1	OTTHUMG00000180633.1	lincRNA	1	0.708717
chr2	231452195	231453153	958	+	ENSG00000233538.1	lincRNA	AC017104.2	OTTHUMG00000153867.1	lincRNA	1	1.04384
chr2	232420661	232421461	800	-	ENSG00000237087.1	lincRNA	AC068134.6	OTTHUMG00000153335.1	lincRNA	1	1.25
chr2	234743542	234745606	2064	-	ENSG00000278593.1	unprocessed_pseudogene	RP13-977E11.1	OTTHUMG00000187710.1	pseudogene	1	0.484496
chr2	238788648	238789716	1068	-	ENSG00000226992.1	lincRNA	AC144525.1	OTTHUMG00000152844.1	lincRNA	1	0.93633
chr2	241724615	241725693	1078	-	ENSG00000235351.1	antisense	AC114730.11	OTTHUMG00000151506.1	lncRNA	1	0.927644
chr2	241734715	241735498	783	-	ENSG00000215692.2	antisense	AC114730.8	OTTHUMG00000151478.1	lncRNA	1	1.27714
chr3	53348	54346	998	-	ENSG00000224918.1	lincRNA	AY269186.2	OTTHUMG00000154852.1	lincRNA	1	1.002
chr3	9014123	9015979	1856	+	ENSG00000224808.1	antisense	SRGAP3-AS1	OTTHUMG00000155031.1	lncRNA	1	0.538793
chr3	10057973	10058287	314	-	ENSG00000229217.1	processed_pseudogene	CYCSP11	OTTHUMG00000155399.1	pseudogene	1	3.18471
chr3	11878830	11879129	299	-	ENSG00000224263.1	processed_pseudogene	CYCSP12	OTTHUMG00000155299.1	pseudogene	1	3.34448
chr3	12787393	12788671	1278	-	ENSG00000213943.3	processed_pseudogene	KRT18P17	OTTHUMG00000155395.1	pseudogene	1	0.782473
chr3	13926813	13927778	965	+	ENSG00000233121.1	unitary_pseudogene	VN1R20P	OTTHUMG00000154485.1	pseudogene	1	1.03627
chr3	25441164	25441502	338	-	ENSG00000229421.1	processed_pseudogene	AC133141.1	OTTHUMG00000155597.2	pseudogene	1	2.95858
chr3	26015669	26016369	700	+	ENSG00000234158.1	processed_pseudogene	RPEP2	OTTHUMG00000155599.1	pseudogene	1	1.42857
chr3	26712307	26713364	1057	+	ENSG00000234165.1	lincRNA	AC114877.3	OTTHUMG00000155686.1	lincRNA	1	0.946074
chr3	40970541	40971578	1037	-	ENSG00000233096.1	lincRNA	RP11-520A21.1	OTTHUMG00000156006.1	lincRNA	1	0.96432
chr3	42340588	42342367	1779	+	ENSG00000229572.1	processed_pseudogene	EIF4BP4	OTTHUMG00000156187.1	pseudogene	1	0.562114
chr3	43087479	43088068	589	+	ENSG00000227245.1	lincRNA	RP11-136C24.2	OTTHUMG00000156464.1	lincRNA	1	1.69779
chr3	52239258	52241097	1839	+	ENSG00000243224.1	antisense	RP5-1157M23.2	OTTHUMG00000158107.1	lncRNA	1	0.543774
chr3	62926371	62926882	511	+	ENSG00000226082.2	processed_pseudogene	RP11-24H1.1	OTTHUMG00000157308.1	pseudogene	1	1.95695
chr3	109409678	109410084	406	-	ENSG00000230618.3	processed_pseudogene	H3F3AP3	OTTHUMG00000159215.1	pseudogene	1	2.46305
chr3	119635526	119636150	624	-	ENSG00000242052.1	processed_pseudogene	RP11-190C22.1	OTTHUMG00000157355.1	pseudogene	1	1.60256
chr3	122660613	122662438	1825	+	ENSG00000243918.1	processed_pseudogene	EIF4BP8	OTTHUMG00000159551.1	pseudogene	1	0.547945
chr3	124862094	124863317	1223	-	ENSG00000243986.2	processed_pseudogene	ENO1P3	OTTHUMG00000159521.2	pseudogene	1	0.817661
chr3	138101478	138102917	1439	-	ENSG00000240668.1	processed_pseudogene	KRT8P36	OTTHUMG00000159822.1	pseudogene	1	0.694927
chr3	140972744	140973255	511	+	ENSG00000248773.1	sense_intronic	RP11-231L11.3	OTTHUMG00000160261.1	lncRNA	1	1.95695
chr3	146589602	146590325	723	+	ENSG00000241457.1	antisense	PLSCR5-AS1	OTTHUMG00000159436.1	lncRNA	1	1.38313
chr3	150238519	150240209	1690	+	ENSG00000244541.5	lincRNA	LINC01213	OTTHUMG00000159737.1	lincRNA	1	0.591716
chr3	156044155	156044948	793	-	ENSG00000242017.1	processed_pseudogene	ALG1L15P	OTTHUMG00000158546.1	pseudogene	1	1.26103
chr3	157162663	157163932	1269	-	ENSG00000244515.1	processed_pseudogene	KRT18P34	OTTHUMG00000158716.1	pseudogene	1	0.788022
chr3	160342685	160343015	330	+	ENSG00000243687.1	processed_pseudogene	RP11-432B6.1	OTTHUMG00000157339.1	pseudogene	1	3.0303
chr3	169769649	169772043	2394	+	ENSG00000269889.1	antisense	RP11-816J6.3	OTTHUMG00000184026.1	lncRNA	2	0.835422
chr3	170062244	170062951	707	+	ENSG00000242583.1	processed_pseudogene	RP11-379K17.9	OTTHUMG00000158778.1	pseudogene	1	1.41443
chr3	170495627	170496636	1009	+	ENSG00000241416.1	processed_pseudogene	KRT8P13	OTTHUMG00000158860.1	pseudogene	1	0.99108
chr3	179649494	179650200	706	-	ENSG00000243977.1	processed_pseudogene	RP11-473P24.2	OTTHUMG00000157785.1	pseudogene	1	1.41643
chr3	183884924	183888449	3525	+	ENSG00000234371.6	transcribed_processed_pseudogene	RPSAP31	OTTHUMG00000156888.1	pseudogene	2	0.567376
chr3	184149704	184150435	731	+	ENSG00000228205.1	processed_pseudogene	RP11-778D9.4	OTTHUMG00000156842.1	pseudogene	1	1.36799
chr3	184741937	184742462	525	+	ENSG00000273403.1	lincRNA	RP11-329B9.3	OTTHUMG00000186128.1	lincRNA	1	1.90476
chr3	195912049	195913986	1937	+	ENSG00000226155.1	antisense	AC124944.3	OTTHUMG00000155825.1	lncRNA	1	0.516262
chr3	196631498	196632587	1089	-	ENSG00000232065.1	antisense	LINC01063	OTTHUMG00000155570.1	lncRNA	1	0.918274
chr3	196999460	197004744	5284	+	ENSG00000228109.1	antisense	MFI2-AS1	OTTHUMG00000155519.1	lncRNA	4	0.757002
chr4	6687448	6690519	3071	-	ENSG00000246526.2	lincRNA	RP11-539L10.2	OTTHUMG00000160124.2	lincRNA	3	0.97688
chr4	39133913	39135608	1695	+	ENSG00000249685.1	lincRNA	RP11-360F5.3	OTTHUMG00000160465.1	lincRNA	1	0.589971
chr4	54376002	54376752	750	+	ENSG00000248518.1	lincRNA	RP11-231C18.2	OTTHUMG00000160648.1	lincRNA	1	1.33333
chr4	69517667	69518400	733	-	ENSG00000248886.2	unprocessed_pseudogene	UGT2A3P7	OTTHUMG00000161619.2	pseudogene	1	1.36426
chr4	70703747	70704491	744	-	ENSG00000272986.1	antisense	RP11-46J23.1	OTTHUMG00000186293.1	lncRNA	1	1.34409
chr4	76756960	76758474	1514	-	ENSG00000233860.1	antisense	RP11-359D14.2	OTTHUMG00000157074.3	lncRNA	1	0.660502
chr4	81919995	81920387	392	-	ENSG00000248448.2	processed_pseudogene	COX5BP1	OTTHUMG00000160936.2	pseudogene	1	2.55102
chr4	82275071	82276600	1529	+	ENSG00000234568.3	processed_pseudogene	BIN2P1	OTTHUMG00000160953.1	pseudogene	1	0.654022
chr4	101347780	101348883	1103	+	ENSG00000254531.1	lincRNA	FLJ20021	OTTHUMG00000166283.1	lincRNA	1	0.906618
chr4	126106139	126106923	784	-	ENSG00000251005.1	processed_pseudogene	RP11-318I4.2	OTTHUMG00000161148.1	pseudogene	1	1.27551
chr4	128069014	128069612	598	-	ENSG00000241651.4	processed_pseudogene	RP11-214O14.1	OTTHUMG00000157552.2	pseudogene	1	1.67224
chr4	135371177	135371924	747	-	ENSG00000250834.1	processed_pseudogene	KRT18P54	OTTHUMG00000161222.1	pseudogene	1	1.33869
chr4	139556799	139557643	844	+	ENSG00000272717.1	antisense	RP11-342I1.2	OTTHUMG00000186389.1	lncRNA	1	1.18483
chr4	144572238	144572983	745	+	ENSG00000250504.2	processed_pseudogene	KRT18P51	OTTHUMG00000161431.2	pseudogene	1	1.34228
chr4	146241806	146243669	1863	+	ENSG00000251010.1	antisense	RP11-6L6.7	OTTHUMG00000162030.1	lncRNA	2	1.07354
chr4	151407551	151408835	1284	-	ENSG00000251611.1	lincRNA	RP11-610P16.1	OTTHUMG00000161670.1	lincRNA	1	0.778816
chr4	157204462	157204855	393	-	ENSG00000249819.1	processed_pseudogene	RP11-392C20.1	OTTHUMG00000161953.1	pseudogene	1	2.54453
chr4	165016887	165017433	546	+	ENSG00000276623.1	processed_pseudogene	RP11-366M4.19	OTTHUMG00000187585.1	pseudogene	1	1.8315
chr4	169010430	169010939	509	+	ENSG00000251445.1	antisense	RP11-483A20.3	OTTHUMG00000161027.1	lncRNA	1	1.96464
chr4	185471516	185472263	747	+	ENSG00000249679.1	antisense	RP11-279O9.4	OTTHUMG00000160454.1	lncRNA	1	1.33869
chr4	189979902	189981808	1906	+	ENSG00000271307.2	processed_pseudogene	AF146191.8	OTTHUMG00000185262.2	pseudogene	1	0.524659
chr5	10627260	10628225	965	-	ENSG00000250106.1	antisense	ANKRD33B-AS1	OTTHUMG00000162124.1	lncRNA	1	1.03627
chr5	10775058	10777062	2004	-	ENSG00000250576.1	lincRNA	CTD-2154B17.1	OTTHUMG00000162122.1	lincRNA	1	0.499002
chr5	17620533	17620939	406	-	ENSG00000250351.1	processed_pseudogene	RP11-432M8.10	OTTHUMG00000161841.1	pseudogene	1	2.46305
chr5	29001760	29003357	1597	+	ENSG00000249226.1	processed_pseudogene	SUCLG2P4	OTTHUMG00000160376.1	pseudogene	1	0.626174
chr5	32522758	32523865	1107	+	ENSG00000249142.1	processed_pseudogene	CTD-2290P7.1	OTTHUMG00000161977.1	pseudogene	1	0.903342
chr5	33997044	33997724	680	-	ENSG00000250767.1	processed_pseudogene	RP11-1084J3.3	OTTHUMG00000162528.1	pseudogene	1	1.47059
chr5	35938822	35939993	1171	+	ENSG00000249748.1	antisense	RP11-79C6.3	OTTHUMG00000162092.1	lncRNA	1	0.853971
chr5	43041575	43045390	3815	+	ENSG00000215068.7	antisense	AC025171.1	OTTHUMG00000131146.2	lncRNA	2	0.524246
chr5	43231812	43233173	1361	-	ENSG00000247763.2	processed_pseudogene	RP11-447H19.1	OTTHUMG00000162228.2	pseudogene	1	0.734754
chr5	61347126	61347716	590	+	ENSG00000251682.1	processed_pseudogene	RP11-631M6.3	OTTHUMG00000162250.1	pseudogene	1	1.69492
chr5	71475761	71476316	555	-	ENSG00000253536.1	processed_pseudogene	RP11-1174L13.2	OTTHUMG00000163655.1	pseudogene	1	1.8018
chr5	73152416	73152938	522	-	ENSG00000250747.1	processed_pseudogene	RP11-232L2.1	OTTHUMG00000162493.1	pseudogene	1	1.91571
chr5	73952940	73954014	1074	+	ENSG00000259968.3	lincRNA	RP11-428C6.2	OTTHUMG00000173474.1	lincRNA	1	0.931099
chr5	78222184	78222517	333	+	ENSG00000249372.1	processed_pseudogene	ATP6V1G1P6	OTTHUMG00000162480.1	pseudogene	1	3.003
chr5	79191549	79191747	198	+	ENSG00000249829.2	processed_pseudogene	CTC-422A18.1	OTTHUMG00000162789.2	pseudogene	1	5.05051
chr5	88602780	88603117	337	+	ENSG00000250705.1	processed_pseudogene	CTC-470C15.1	OTTHUMG00000162633.1	pseudogene	1	2.96736
chr5	90410000	90410669	669	+	ENSG00000255647.3	processed_transcript	CTD-2373J6.2	OTTHUMG00000186592.2	processed_transcript	1	1.49477
chr5	93741640	93743500	1860	+	ENSG00000272406.1	lincRNA	RP11-185E12.2	OTTHUMG00000182153.2	lincRNA	1	0.537634
chr5	95834424	95835046	622	-	ENSG00000251000.1	processed_pseudogene	AC008592.3	OTTHUMG00000162736.1	pseudogene	1	1.60772
chr5	112173570	112175548	1978	+	ENSG00000250882.1	antisense	CTC-459M5.1	OTTHUMG00000162896.1	lncRNA	1	0.505561
chr5	112419583	112420978	1395	+	ENSG00000278921.2	lincRNA	EPB41L4A-AS2	OTTHUMG00000169519.1	lincRNA	1	0.716846
chr5	115770586	115770989	403	+	ENSG00000251118.1	processed_pseudogene	CTC-505O3.1	OTTHUMG00000162915.2	pseudogene	1	2.48139
chr5	129459559	129460689	1130	-	ENSG00000249421.1	antisense	ADAMTS19-AS1	OTTHUMG00000163040.1	lncRNA	1	0.884956
chr5	130140031	130141950	1919	+	ENSG00000248610.1	processed_pseudogene	HSPA8P4	OTTHUMG00000163044.1	pseudogene	1	0.521105
chr5	132011448	132013199	1751	+	ENSG00000231585.1	antisense	AC034228.2	OTTHUMG00000059635.1	lncRNA	1	0.571102
chr5	132179234	132181128	1894	-	ENSG00000224015.1	lincRNA	AC063976.3	OTTHUMG00000059642.1	lincRNA	1	0.527983
chr5	134226410	134227827	1417	+	ENSG00000270177.1	lincRNA	CTD-2410N18.3	OTTHUMG00000184010.1	lincRNA	1	0.705716
chr5	139775305	139775472	167	+	ENSG00000271792.1	lincRNA	CTB-35F21.5	OTTHUMG00000185580.1	lincRNA	1	5.98802
chr5	140875346	140875922	576	-	ENSG00000278915.1	antisense	AC005609.18	OTTHUMG00000189138.1	lncRNA	1	1.73611
chr5	141177849	141182369	4520	+	ENSG00000279472.1	processed_transcript	CH17-140K24.4	OTTHUMG00000189125.1	processed_transcript	3	0.663717
chr5	141326210	141329357	3147	+	ENSG00000272070.1	lincRNA	AC005618.6	OTTHUMG00000185596.1	lincRNA	2	0.635526
chr5	141350109	141350662	553	-	ENSG00000280026.1	antisense	AC005618.8	OTTHUMG00000189141.1	lncRNA	1	1.80832
chr5	147887112	147887704	592	+	ENSG00000251320.1	antisense	CTC-327F10.4	OTTHUMG00000163419.1	lncRNA	1	1.68919
chr5	149430286	149432834	2548	+	ENSG00000269936.3	lincRNA	RP11-394O4.5	OTTHUMG00000184101.1	lincRNA	2	0.784929
chr5	151319422	151319776	354	+	ENSG00000270904.1	processed_pseudogene	CTC-224D3.1	OTTHUMG00000184553.1	pseudogene	1	2.82486
chr5	159950493	159951498	1005	-	ENSG00000248626.1	processed_pseudogene	GAPDHP40	OTTHUMG00000159985.1	pseudogene	1	0.995025
chr5	171365595	171367693	2098	+	ENSG00000254256.1	processed_pseudogene	RP11-117L6.1	OTTHUMG00000163206.1	pseudogene	1	0.476644
chr5	173144162	173145039	877	-	ENSG00000253172.1	antisense	CTC-209H22.3	OTTHUMG00000163320.1	lncRNA	2	2.2805
chr5	174056060	174056585	525	-	ENSG00000253244.1	antisense	RP11-619L12.3	OTTHUMG00000163446.1	lncRNA	1	1.90476
chr5	176006145	176007387	1242	+	ENSG00000272494.1	unprocessed_pseudogene	OR1X1P	OTTHUMG00000185807.1	pseudogene	1	0.805153
chr5	176354206	176356168	1962	+	ENSG00000251414.1	antisense	RP11-843P14.1	OTTHUMG00000163188.1	lncRNA	1	0.509684
chr5	177554824	177555364	540	+	ENSG00000272459.1	lincRNA	RP11-1277A3.3	OTTHUMG00000185636.1	lincRNA	1	1.85185
chr5	177836434	177837646	1212	-	ENSG00000214351.5	unprocessed_pseudogene	OR1X5P	OTTHUMG00000154337.1	pseudogene	1	0.825083
chr5	180293245	180295253	2008	+	ENSG00000248367.1	antisense	CTB-129O4.1	OTTHUMG00000163311.1	lncRNA	1	0.498008
chr5	181191046	181191852	806	-	ENSG00000248473.1	lincRNA	CTC-338M12.2	OTTHUMG00000162379.1	lincRNA	1	1.24069
chr6	2910613	2912113	1500	-	ENSG00000232999.1	unitary_pseudogene	RP1-90J20.10	OTTHUMG00000155040.1	pseudogene	1	0.666667
chr6	2916894	2917733	839	+	ENSG00000228365.1	lincRNA	RP1-90J20.2	OTTHUMG00000014132.1	lincRNA	1	1.1919
chr6	2987967	2991173	3206	+	ENSG00000244041.7	lincRNA	LINC01011	OTTHUMG00000014128.5	lincRNA	3	0.935745
[truncated: 458 more rows]

## Sheet: HCT-116
chromosome	start	end	width	strand	gene id	gene type	gene name	havana gene	biotype	CTCF count	CTCF density
[truncated: 592 more rows]

[truncated: 10 more sheets: HEK293, HL-60, NB4, CD14+ monocyte, B cell, neutrophil, fibroblast lung, kidney epithelial cell, cardiac muscle cell, osteoblast]
