# Supplementary material for: Myeloid leukemia vulnerabilities at CTCF-enriched long noncoding RNA loci
Source: Research Square preprint supplement (doi:10.21203/rs.3.rs-727909/v1), 2021-08-09
Supplement: Supplementary file 7 [file dabb3296d0c3f4f17efc5f8e.xlsx]

## Sheet: Sheet 1
Supplementary Table 9: Capture-C gained region library sequences
sgRNA name	target gene	spacer	purpose
DH-CTS11a_Luc	LUC	AGTTCACCGGCGTCATCGTC	controls
DH-CTS12a_Luc	LUC	TCCAAAACAACAACGGCGGC	controls
DH-CTS13a_Luc	LUC	ACCGCGAAAAAGTTGCGCGG	controls
DH-CTS14a_Luc	LUC	ACAACCGCGAAAAAGTTGCG	controls
LUC3_7	LUC	CCGCTGGAAGATGGAACCGC	controls
LUC3_8	LUC	GGGCATTTCGCAGCCTACCG	controls
DH-CTS15a_NeoR	NeoR	TGCGCAAGGAACGCCCGTCG	controls
DH-CTS16a_NeoR	NeoR	CGGCGATACCGTAAAGCACG	controls
PPP1R12C_1	PPP1R12C	GGCGCTGATACCGTCGGCGT	controls
PPP1R12C_2	PPP1R12C	ACTCGGCGGCGCGCTCGAAG	controls
PPP1R12C_3	PPP1R12C	GTGGCTACCTAGATATCGCC	controls
PPP1R12C_4	PPP1R12C	ACTGTTGACGGCGGCGATGT	controls
PPP1R12C_5	PPP1R12C	GCCGAGTCGGACGCCATGGA	controls
SLC22A13_1	SLC22A13	GCTGCGTCTCATTGAAGCGG	controls
SLC22A13_2	SLC22A13	GGTGCTTCCGATCACAAACC	controls
SLC22A13_3	SLC22A13	CGCAAGCACCATCTGCCCGA	controls
U2AF1_2	U2AF1	GCTTCTCTGAAGTCCGTCAC	controls
U2AF1_5	U2AF1	GGTGGGGAACGTGTACGTCA	controls
RPL9_1	RPL9	TCTAGTCGACATTACTCTGA	controls
RPL9_2	RPL9	TACAGCTCCGGGTTGACAAA	controls
POL2RA_1	POL2RA	ACTGTGACAATCATCCACTC	controls
POL2RA_4	POL2RA	CACTCTGGCCGTGCATAGCG	controls
COMMD4_1	COMMD4	GGACTGTCCCGACTGGGTCC	test
COMMD4_2	COMMD4	GATTTCTGCCAGGACCCAGT	test
COMMD4_3	COMMD4	CTCACGGCTGACGCCAAGTT	test
COMMD4_4	COMMD4	TGGCGTCAGCCGTGAGCTTC	test
COMMD4_5	COMMD4	TGTGCTTGGCCGCACTGGAG	test
NEIL1_1	NEIL1	TTCGTGGACATCCGCCGGTT	test
NEIL1_2	NEIL1	GTCTTCCGCTTCGGCATGTC	test
NEIL1_3	NEIL1	CCGGCTCGCCCTATGTTTCG	test
NEIL1_4	NEIL1	CATGCCGAAGCGGAAGACCA	test
NEIL1_5	NEIL1	CATGGCGTGGCAGCTCCTCG	test
MAN2C1_1	MAN2C1	TTTACCGACTGTAACCTCCG	test
MAN2C1_2	MAN2C1	CTGCGCCGGCCTTGAAGCAC	test
MAN2C1_3	MAN2C1	GACTTCCGCCCCGCGCAGGT	test
MAN2C1_4	MAN2C1	AGGGAAGTCTCTCCGGCGTC	test
MAN2C1_5	MAN2C1	GAAGGTCTGGTGTGGCGTGA	test
SIN3A_1	SIN3A	TGTATGCAGCCCAGCAGCGT	test
SIN3A_2	SIN3A	TGCCAGGGATCCGACGCTGC	test
SIN3A_3	SIN3A	ACTGGTGCAACTGGTGGGGC	test
SIN3A_4	SIN3A	TATAGCGGGCCCATGACTGC	test
SIN3A_5	SIN3A	CGTGGGGCTGCACCGCTGTT	test
PTPN9_1	PTPN9	TCCGGCGCCATGTCGGGCCG	test
PTPN9_2	PTPN9	GTCAGCTCCGGCGCCATGTC	test
PTPN9_3	PTPN9	GAACGAAGAGGTTCCTCATG	test
PTPN9_4	PTPN9	AGTCCAACATGTGGTACTTC	test
PTPN9_5	PTPN9	GATGCAACCTGGCAGTAAAG	test
SNUPN_1	SNUPN	TGAGCGCCGCCGGAGGTTAC	test
SNUPN_2	SNUPN	GCAGTTCCAGTAACCTCCGG	test
SNUPN_3	SNUPN	ACTTGTACTGGGATAGGCGG	test
SNUPN_4	SNUPN	TGTGAACCATGCCAGAAGAC	test
SNUPN_5	SNUPN	GTCATCTTCAGCCAGTCTTC	test
IMP3_1	IMP3	ACGCGGAACTGGTCGCGTTC	test
IMP3_2	IMP3	GGAGCAAGGGCACGTACGCG	test
IMP3_3	IMP3	TGCGCGTGCTGCGGCGTTAC	test
IMP3_4	IMP3	CGGGGTCGGTAACCACGTCA	test
IMP3_5	IMP3	GGAGCTCTGCGACTTCGTCA	test
SNX33_1	SNX33	TATGTGGAGATCGTCCGTTC	test
SNX33_2	SNX33	CATCTTTAGCGAGACCTCAC	test
SNX33_3	SNX33	GGACGACGGATGCACAGTGG	test
SNX33_4	SNX33	GCAGGGCGAAACCCACCACG	test
SNX33_5	SNX33	AGAGGTTGTCATACATGCGC	test
CSPG4_1	CSPG4	TTGGCCAGACTTGCATCCGC	test
CSPG4_2	CSPG4	TCGGTCAGAGCCGTGGCCAC	test
CSPG4_3	CSPG4	GGTATGTTTGGCCCCTCCGA	test
CSPG4_4	CSPG4	TGTCCAGCTCGAGCTCGCCA	test
CSPG4_5	CSPG4	GGAGGTGTCGGTGACGGCTC	test
ODF3L1_1	ODF3L1	TTGATCTTGGCCATGATGAC	test
ODF3L1_2	ODF3L1	ACAGAGCTCCTGGTCCCCTT	test
ODF3L1_3	ODF3L1	CAGCTTATACCCTGCATAGC	test
ODF3L1_4	ODF3L1	ATGATCTATGTAGCCCGTGC	test
ODF3L1_5	ODF3L1	CGGGGCCCGCCAAGTACCTC	test
FBXO22_1	FBXO22	CGCCAGGTTACTCAACACGA	test
FBXO22_2	FBXO22	GCAGAGTATTGCGGACCCAT	test
FBXO22_3	FBXO22	GGGGCATTGCTTGGTTCGCG	test
FBXO22_4	FBXO22	GAGTGTCGTGGCCATAAGAG	test
FBXO22_5	FBXO22	CGATTGCTACCTGATCCCAT	test
NRG4_1	NRG4	AGGCAAAACGACTTGTGACT	test
NRG4_2	NRG4	CATAACAAAGCCCCCCATTC	test
NRG4_3	NRG4	GTCCTAGTAACACTTATCAT	test
NRG4_4	NRG4	TACAGGAGCTCGTTGTGAAG	test
NRG4_5	NRG4	TTAGTTTGGATGCTGGAGCC	test
TMEM266_1	TMEM266	CTCGCAGCTCCTGTCAAATC	test
TMEM266_2	TMEM266	GCTGTCGATCTCTCCACGGC	test
TMEM266_3	TMEM266	GCTGGTGAACTTTGCCTATC	test
TMEM266_4	TMEM266	CCTGGTAGCCTGTGTAATAT	test
TMEM266_5	TMEM266	GGTGGTGATTCTCCTGACTC	test
ETFA_1	ETFA	ATGTTCCGAGCGGCGGCTCC	test
ETFA_2	ETFA	GCTCAGCATGATGTGTACAA	test
ETFA_3	ETFA	TGGAGCATCTGCCTTCGGAA	test
ETFA_4	ETFA	AATCGGGGCAACCTCAAGTT	test
ETFA_5	ETFA	CGGTAGTGCCAGTTCAGAAA	test
ISL2_1	ISL2	TCACCCATAGCACCCAGAAA	test
ISL2_2	ISL2	GGGTGTCGCCCGACCTCGAG	test
ISL2_3	ISL2	CCCGCAGGATAAACTGGTCG	test
ISL2_4	ISL2	TGCCGAGTGCAGCCAGTACC	test
ISL2_5	ISL2	CCCGGGACGGCCATGTGCGT	test
SCAPER_1	SCAPER	TGTCATGACTATTGGAGCGC	test
SCAPER_2	SCAPER	CCAATAGTCATGACAAAGTA	test
SCAPER_3	SCAPER	TGATCTAAGAGCTCGATACT	test
SCAPER_4	SCAPER	AAAATAACATCGTCTACGAC	test
SCAPER_5	SCAPER	GCTAGCAGATCGTCTAGAAA	test
SCAPER_6	SCAPER	TTTAGCAAGGACTTCTGCCA	test
RCN2_1	RCN2	CGAGGAGCTGCACTACCCGC	test
RCN2_2	RCN2	AGCCCCAACGCCGCGGTCCT	test
RCN2_3	RCN2	CCGCAGCGACTACGACCGCG	test
RCN2_4	RCN2	GTCATATAATCAACTTCTTC	test
RCN2_5	RCN2	TCAAACCGGGACCTGAATCC	test
PSTPIP1_1	PSTPIP1	CAGCACCTCGTAGCCCGTGT	test
PSTPIP1_2	PSTPIP1	CACAGCCCACACGGGCTACG	test
PSTPIP1_3	PSTPIP1	TCCCGTACCGCTCCTCCGCC	test
PSTPIP1_4	PSTPIP1	GTGCAGATCGCACGGAAGGC	test
PSTPIP1_5	PSTPIP1	GTCTCGAGGAGTTTCGTGAG	test
TSPAN3_1	TSPAN3	AAAGACCAGCACGGTCTTGG	test
TSPAN3_2	TSPAN3	ACAGCGACTTTCCCGGATTG	test
TSPAN3_3	TSPAN3	ACAGCTATGATCACTACAGC	test
TSPAN3_4	TSPAN3	CCAACCCTGATGCTGCTAGC	test
TSPAN3_5	TSPAN3	ATAGCCCGGCTAGCAGCATC	test
PEAK1_1	PEAK1	AGTGGGCTTCACAGCTATAG	test
PEAK1_2	PEAK1	TGTGAAGCCCACTATGATAG	test
PEAK1_3	PEAK1	GCGGTGGTTGTTACTGTGAT	test
PEAK1_4	PEAK1	CGGTTCCACCCTATGATGAC	test
PEAK1_5	PEAK1	TGATTGCTATAAACGATCAT	test
PEAK1_6	PEAK1	CCACCTATCATGCAACTTGG	test
HMG20A_1	HMG20A	ATCTGCAAAAAGGGGCGGTA	test
HMG20A_2	HMG20A	GATGTGGCGCCACTACTGTA	test
HMG20A_3	HMG20A	GAGAGATCCTCCACAAATTC	test
HMG20A_4	HMG20A	GCACCCAAATCCCCCCTTAC	test
HMG20A_5	HMG20A	GGTGCATTGCTGTCTCGAAG	test
LINGO1_1	LINGO1	TCCAGCAGGCGCGTCTCGGT	test
LINGO1_2	LINGO1	GGACTGCCACAAAGCGCTTG	test
LINGO1_3	LINGO1	GCGCTTTGTGGCAGTCCCCG	test
LINGO1_4	LINGO1	CTGCCACAAAGCGCTTGCGG	test
LINGO1_5	LINGO1	GGCACAGCACAGCGCGGTCC	test
TBC1D2B_1	TBC1D2B	GCGCGTCGAACACGAACCAG	test
TBC1D2B_2	TBC1D2B	TTACTATTTCAAGAGTCCGC	test
TBC1D2B_3	TBC1D2B	GCGGCTGCGGTAGCCACGCA	test
TBC1D2B_4	TBC1D2B	GTAAGTCATGAGTTGACGAT	test
TBC1D2B_5	TBC1D2B	GCTGCAAATCAGCCCGCCCC	test
SH2D7_1	SH2D7	CACCGTTCTGCAGAATGAAG	test
SH2D7_2	SH2D7	CGCCTCAGTGACCGAGCCAC	test
SH2D7_3	SH2D7	GGGCCTCCACCAGACCATCG	test
SH2D7_4	SH2D7	GGGGGCTGGCGGCCTTGTCG	test
SH2D7_5	SH2D7	AGGATGAACCAGGCACGGCT	test
CIB2_1	CIB2	GTAGTTGTCTAGCTGCTCTT	test
CIB2_2	CIB2	GCTCATGGGCACGTGGACGA	test
CIB2_3	CIB2	GTAGTCCATTGGGACGAGGT	test
CIB2_4	CIB2	TAGTTTGCCTTGAGCTCTCG	test
CIB2_5	CIB2	CTTCAAAGAAAGGATCGTGG	test
IDH3A_1	IDH3A	TGGGCCCGCGTGGATCTCTA	test
IDH3A_2	IDH3A	AACCCAAAACAGGTGACCAG	test
IDH3A_3	IDH3A	TCTGGGCCAATACCATCTCC	test
IDH3A_4	IDH3A	CGGAACGTCACTGCCATTCA	test
IDH3A_5	IDH3A	ATGGTCGGACATTCGCGTAA	test
IDH3A_6	IDH3A	ATGGGTGACCGGCTGCTATT	test
ACSBG1_1	ACSBG1	TATCCAGCTCCAGAATTGCG	test
ACSBG1_2	ACSBG1	TGGATACGGCTGCCCACACG	test
ACSBG1_3	ACSBG1	TGTGGACGACTCGGGCCGAT	test
ACSBG1_4	ACSBG1	GGCAGCTGGGGTCTATGCGC	test
ACSBG1_5	ACSBG1	TATGGGGACCTCATCGCTTT	test
DNAJA4_1	DNAJA4	CATCCGGGTTCTTGTCCGGG	test
DNAJA4_2	DNAJA4	CTTGAGCGCCAGCTTCCGAT	test
DNAJA4_3	DNAJA4	ATCTCCTCCGGGGACGCGCT	test
DNAJA4_4	DNAJA4	TTATGACCAAGGCGGAGAGC	test
DNAJA4_5	DNAJA4	TCCATGGGTGAAGAGAAGCT	test
WDR61_1	WDR61	GACCTTCACCAGGTCATCTA	test
WDR61_2	WDR61	TTGATGCTCATATTCGTCTT	test
WDR61_3	WDR61	GAATATTCTTTGGACACGAG	test
WDR61_4	WDR61	CTGGCTAGGTATTTCCCATC	test
WDR61_5	WDR61	GCTCAGCGTGCCAGCCAAAT	test
WDR61_6	WDR61	GAATGCAACGTTCAGCACCC	test
